# Supplementary material for: Regioselective and stereoselective cyclizations of cyclohexadienones tethered to active methylene groups
Source: Royal Society of Chemistry journal article supplement (doi:10.1039/c1ob06125a), 2011-01-01
Supplement: c1ob06125a.pdf [file c1ob06125a.pdf]

**Regioselective and Stereoselective Cyclizations of Cyclohexadienones Tethered to Active Methylene Groups.**

Rodolfo Tello-Aburto, Kyle A. Kalstabakken, Kelly A. Volp, and Andrew M. Harned\*

*University of Minnesota, Department of Chemistry, 207 Pleasant Street SE, Minneapolis, MN, USA 55455*

**SUPPORTING INFORMATION**

**Table of Contents**

|                                                                                     |               |
|-------------------------------------------------------------------------------------|---------------|
| <b>Structures of Catalysts</b>                                                      | <b>SI-2</b>   |
| <b>Optimization of Desymmetrization Reaction</b>                                    | <b>SI-3</b>   |
| <b>X-ray structure of 12r</b>                                                       | <b>SI-4</b>   |
| <b>Materials and Methods</b>                                                        | <b>SI-5</b>   |
| <b>Experimental Details and Characterization Data</b>                               | <b>SI-6</b>   |
| <b>Copies of <math>^1\text{H}</math> and <math>^{13}\text{C}</math> NMR Spectra</b> | <b>SI-40</b>  |
| <b>HPLC Chromatograms</b>                                                           | <b>SI-191</b> |

## Structures of Catalysts

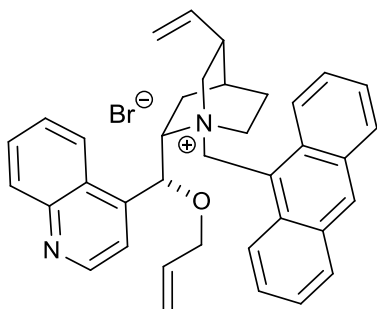

Catalyst A

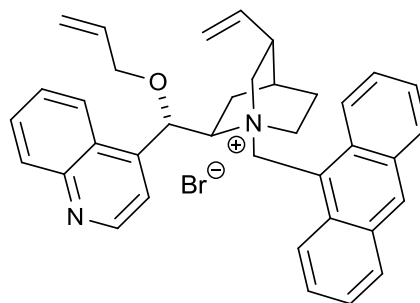

Catalyst B

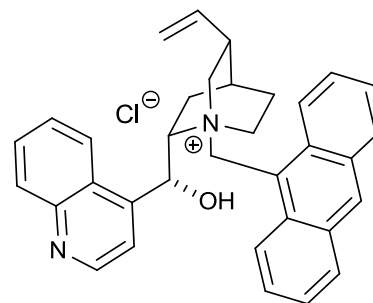

Catalyst C

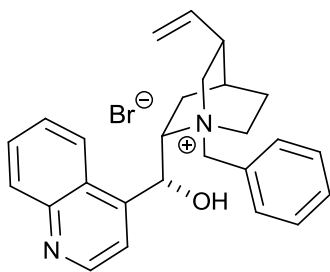

Catalyst D

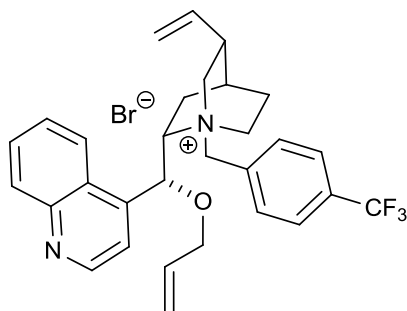

Catalyst E

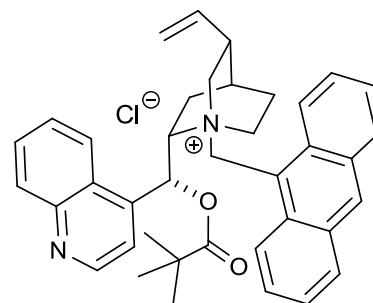

Catalyst F

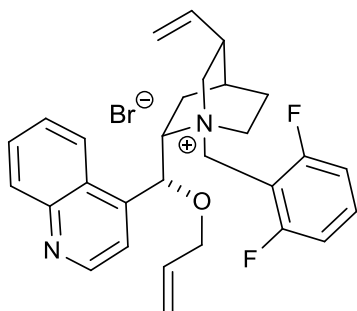

Catalyst G

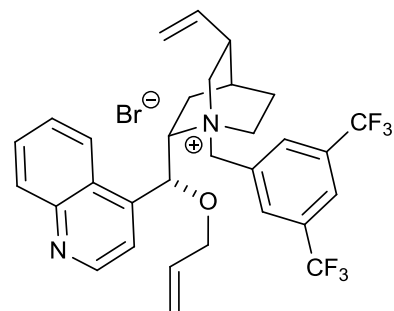

Catalyst H

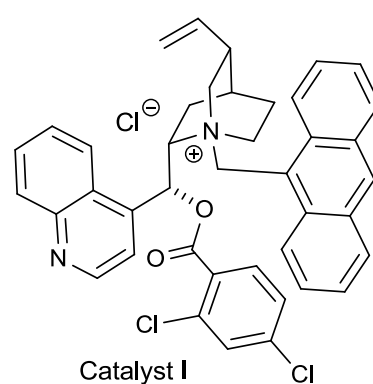

Catalyst I

# Optimization of Desymmetrization Reaction <sup>a</sup>

| Entry           | Substrate | Catalyst | Base <sup>b</sup>                            | Solvent                                            | Additive       | Time (h) | Yield (%) | er <sup>c</sup> |
|-----------------|-----------|----------|----------------------------------------------|----------------------------------------------------|----------------|----------|-----------|-----------------|
| 1 <sup>d</sup>  | <b>2</b>  | <b>A</b> | Cs <sub>2</sub> CO <sub>3</sub>              | CH <sub>2</sub> Cl <sub>2</sub>                    | –              | 24       | 75        | 64 : 36         |
| 2               | <b>2</b>  | <b>A</b> | CsOH•H <sub>2</sub> O <sup>e</sup>           | CH <sub>2</sub> Cl <sub>2</sub>                    | –              | 9        | 75        | 65 : 35         |
| 3               | <b>2</b>  | <b>C</b> | Cs <sub>2</sub> CO <sub>3</sub>              | CH <sub>2</sub> Cl <sub>2</sub>                    | –              | 2        | ND        | 58 : 42         |
| 4 <sup>d</sup>  | <b>2</b>  | <b>D</b> | Cs <sub>2</sub> CO <sub>3</sub>              | CH <sub>2</sub> Cl <sub>2</sub>                    | –              | 7.5      | >99       | 48 : 52         |
| 5 <sup>d</sup>  | <b>3</b>  | <b>A</b> | Cs <sub>2</sub> CO <sub>3</sub>              | CH <sub>2</sub> Cl <sub>2</sub>                    | –              | 6.5      | 99        | 59 : 41         |
| 6               | <b>4a</b> | <b>A</b> | Cs <sub>2</sub> CO <sub>3</sub>              | CH <sub>2</sub> Cl <sub>2</sub>                    | –              | 1        | 79        | 71 : 29         |
| 7               | <b>4a</b> | <b>B</b> | Cs <sub>2</sub> CO <sub>3</sub>              | CH <sub>2</sub> Cl <sub>2</sub>                    | –              | 2        | 97        | 29 : 71         |
| 8               | <b>4a</b> | <b>A</b> | K <sub>2</sub> CO <sub>3</sub>               | CH <sub>2</sub> Cl <sub>2</sub>                    | –              | 4.5      | 77        | 71 : 29         |
| 9               | <b>4a</b> | <b>A</b> | Cs <sub>2</sub> CO <sub>3</sub> <sup>f</sup> | CH <sub>2</sub> Cl <sub>2</sub>                    | –              | 0.33     | 63        | 71 : 29         |
| 10              | <b>4a</b> | <b>A</b> | KF•2H <sub>2</sub> O <sup>g</sup>            | CH <sub>2</sub> Cl <sub>2</sub>                    | –              | 96       | ND        | 68 : 32         |
| 11              | <b>4a</b> | <b>A</b> | KF•2H <sub>2</sub> O <sup>h</sup>            | CH <sub>2</sub> Cl <sub>2</sub>                    | –              | 24       | ND        | 67 : 33         |
| 12 <sup>d</sup> | <b>4a</b> | <b>A</b> | Cs <sub>2</sub> CO <sub>3</sub>              | toluene                                            | –              | 19       | 92        | 63 : 37         |
| 13              | <b>4a</b> | <b>A</b> | Cs <sub>2</sub> CO <sub>3</sub>              | THF                                                | –              | 3.5      | 82        | 67 : 33         |
| 14              | <b>4a</b> | <b>E</b> | Cs <sub>2</sub> CO <sub>3</sub>              | CH <sub>2</sub> Cl <sub>2</sub>                    | –              | 2        | 85        | 59 : 41         |
| 15              | <b>4a</b> | <b>F</b> | Cs <sub>2</sub> CO <sub>3</sub>              | CH <sub>2</sub> Cl <sub>2</sub>                    | –              | 1        | 83        | 70 : 30         |
| 16              | <b>4a</b> | <b>F</b> | Cs <sub>2</sub> CO <sub>3</sub> <sup>i</sup> | CH <sub>2</sub> Cl <sub>2</sub>                    | –              | 1        | 90        | 41 : 59         |
| 17 <sup>d</sup> | <b>4a</b> | <b>A</b> | Cs <sub>2</sub> CO <sub>3</sub>              | “wet” CH <sub>2</sub> Cl <sub>2</sub> <sup>j</sup> | –              | 5        | 85        | 73 : 27         |
| 18 <sup>d</sup> | <b>4a</b> | <b>A</b> | Cs <sub>2</sub> CO <sub>3</sub>              | CH <sub>2</sub> Cl <sub>2</sub>                    | 4Å mol. sieves | 18       | 88        | 74 : 26         |
| 19              | <b>4a</b> | <b>A</b> | Cs <sub>2</sub> CO <sub>3</sub>              | CF <sub>3</sub> C <sub>6</sub> H <sub>5</sub>      | 4Å mol. sieves | 2        | 79        | 75 : 25         |
| 20              | <b>4a</b> | <b>G</b> | Cs <sub>2</sub> CO <sub>3</sub>              | CF <sub>3</sub> C <sub>6</sub> H <sub>5</sub>      | 4Å mol. sieves | 2.5      | 96        | 69 : 31         |
| 21              | <b>4a</b> | <b>H</b> | Cs <sub>2</sub> CO <sub>3</sub>              | CF <sub>3</sub> C <sub>6</sub> H <sub>5</sub>      | 4Å mol. sieves | 7        | 81        | 59 : 41         |
| 22              | <b>4a</b> | <b>I</b> | Cs <sub>2</sub> CO <sub>3</sub>              | CF <sub>3</sub> C <sub>6</sub> H <sub>5</sub>      | 4Å mol. sieves | 7        | 99        | 74 : 26         |

<sup>a</sup> All reactions run at 0 °C unless otherwise noted. ND: Not determined. <sup>b</sup> 1 equiv used, unless otherwise noted. <sup>c</sup> Determined by chiral HPLC analysis with monitoring at 225 nm. <sup>d</sup> Performed at –78 °C → r.t. <sup>e</sup> Performed at –78 °C. <sup>f</sup> Aq. saturated solution. <sup>g</sup> Performed at 0 °C → r.t. <sup>h</sup> 10 equiv base. <sup>i</sup> 0.1 equiv base. <sup>j</sup> CH<sub>2</sub>Cl<sub>2</sub> was shaken with H<sub>2</sub>O and separated before use.

## X-ray Structure of 12r<sup>1</sup>

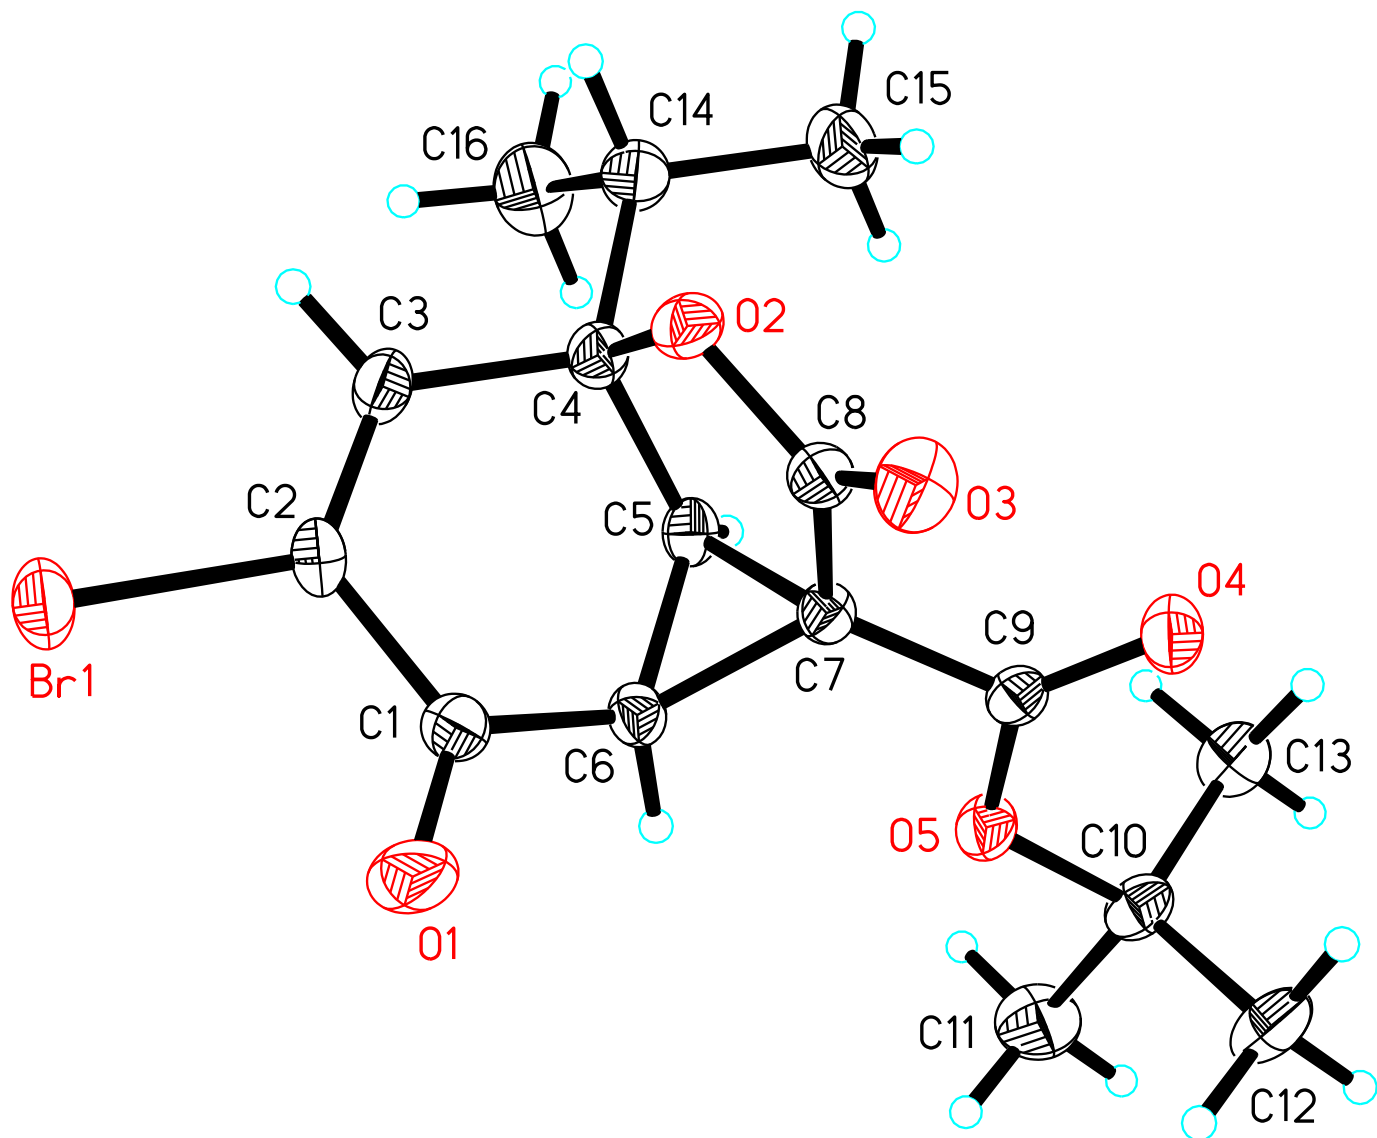

<sup>1</sup> See CIF file for more information.

## Materials and Methods

Unless otherwise stated, reactions were performed in flame- or oven-dried glassware under an argon or nitrogen atmosphere using anhydrous solvents. Acetonitrile,  $\text{CH}_2\text{Cl}_2$  and DME were dried by passage through an activated alumina column under argon. THF was distilled from sodium/benzophenone ketyl. Powdered 4Å molecular sieves were activated by heating under vacuum and kept at 90 °C until use. Microwave reactions were prepared in sealed reaction tubes and conducted in a Biotage Initiator 8 microwave reactor equipped with an IR sensor to monitor reaction temperature. Thin-layer chromatography (TLC) was performed using plates precoated with silica gel XHL w/ UV254 (250  $\mu\text{m}$ ) or alumina W/ UV and visualized by UV light or  $\text{KMnO}_4$ , phosphomolybdic acid, or anisaldehyde stains, followed by heating. Silica gel (particle size 32-63  $\mu\text{m}$ ) was used for flash chromatography.  $^1\text{H}$  and  $^{13}\text{C}$  NMR spectra are reported relative to the residual solvent peak ( $\delta$  7.26 and  $\delta$  77.2 for  $^1\text{H}$  and  $^{13}\text{C}$  in  $\text{CDCl}_3$ ,  $\delta$  7.16 and  $\delta$  128.0 for  $^1\text{H}$  and  $^{13}\text{C}$  in  $\text{C}_6\text{D}_6$ , respectively). Data for  $^1\text{H}$  NMR spectra are reported as follows: chemical shift ( $\delta$  ppm) (multiplicity, coupling constant (Hz), integration). Spectra are described using the following abbreviations: s = singlet, d = doublet, t = triplet, q = quartet, hept = heptet, m = multiplet, bs = broad singlet. IR samples were prepared on NaCl plates either neat or by evaporation from  $\text{CHCl}_3$  or  $\text{CH}_2\text{Cl}_2$ .

## Experimental Details and Characterization Data

**General method A: Dearomatization of phenols using  $\text{PhI}(\text{OAc})_2$ .** A solution of the corresponding phenol (1 equiv) in 3:1 MeCN–H<sub>2</sub>O (0.1 M in substrate) was cooled to 0 °C and treated with  $\text{PhI}(\text{OAc})_2$  (1.1 equiv). The reaction mixture was stirred until consumption of the starting material (usually within 1 h), then diluted with CH<sub>2</sub>Cl<sub>2</sub>, washed with saturated aq. NaHCO<sub>3</sub> and brine, dried over Na<sub>2</sub>SO<sub>4</sub>, filtered and concentrated.

**General method B: Coupling of phenols using trifluoroacetic anhydride.** A procedure by Stork<sup>2</sup> was adapted. Trifluoroacetic anhydride (2 mL per mmol of substrate) was added to a flask containing the mono-alkyl malonate (2.5 equiv). The mixture was stirred for 30 min before it was placed it under high vacuum to remove formed TFA and excess trifluoroacetic anhydride. The flask was back-filled with nitrogen and a solution of the appropriate quinol (1 equiv) in DME (0.05 M in substrate) was added. The solution was stirred until consumption of the starting material (usually between 1 and 3 h), at which point it was quenched by addition of saturated aq. NaHCO<sub>3</sub>. The mixture was extracted with CH<sub>2</sub>Cl<sub>2</sub> and the organic layer dried over Na<sub>2</sub>SO<sub>4</sub>, filtered, and concentrated.

**General method C: Coupling of phenols using DCC.** DCC (3 equiv) was added to a solution of the appropriate quinol (1 equiv), the corresponding acid (3 equiv), and DMAP (10 mol%) in CH<sub>2</sub>Cl<sub>2</sub> (0.4 M in substrate). The mixture was stirred until consumption of the starting material (usually between 1 and 3 h), then diluted with Et<sub>2</sub>O, filtered, and concentrated.

---

<sup>2</sup> G. Stork, J. J. La Clair, P. Spargo, R. P. Nargund, and N. Totah, *J. Am. Chem. Soc.* 1996, **118**, 5304.

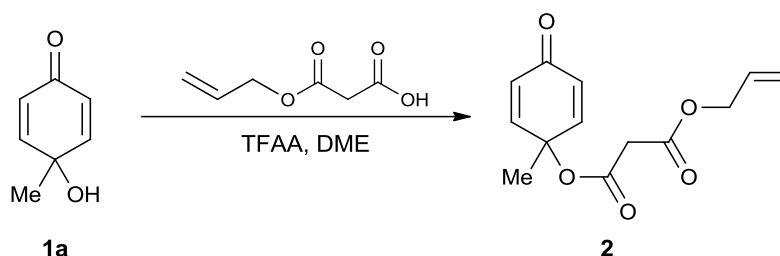

**Allyl-(1-methyl-4-oxocyclohexa-2,5-dien-1-yl) malonate (2).** Using general method B, mono-allyl malonate<sup>3</sup> was coupled to quinol **1a**<sup>4</sup> to give **2** in 66% yield after flash-column chromatography (3:1 hexanes–EtOAc). **IR** (thin film) 2983, 2941, 1736, 1668, 1631, 1329, 1270, 1150, 1053, 992, 858 cm<sup>-1</sup>; **<sup>1</sup>H NMR** (300 MHz, CDCl<sub>3</sub>) δ 6.90 (d, *J* = 10.2 Hz, 2 H), 6.25 (d, *J* = 10.2 Hz, 2 H), 6.00–5.81 (m, 1 H), 5.35 (ddd, *J* = 17.2, 2.6, 1.2 Hz, 1 H), 5.28 (ddd, *J* = 10.4, 2.3, 1.2 Hz, 1 H), 4.65 (d, *J* = 5.8 Hz, 2 H), 3.40 (s, 3H); **<sup>13</sup>C NMR** (75 MHz, CDCl<sub>3</sub>, DEPT) δ 185.0 (C), 166.0 (C), 165.0 (C), 148.4 (CH × 2), 131.4 (CH), 128.6 (CH × 2), 119.3 (CH<sub>2</sub>), 75.5 (C), 66.4 (CH<sub>2</sub>), 41.8 (CH<sub>2</sub>); 26.3 (CH<sub>3</sub>); **HRMS** (ESI+) 273.0733 calcd for C<sub>13</sub>H<sub>14</sub>O<sub>5</sub>Na, found 273.0742.

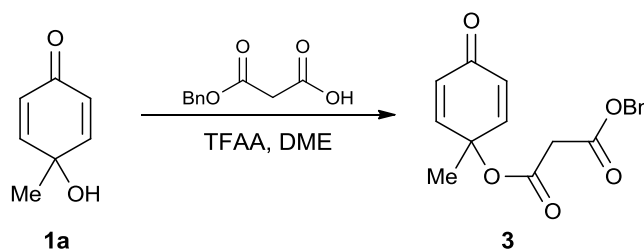

**Benzyl (1-methyl-4-oxocyclohexa-2,5-dien-1-yl) malonate (3).** Using general method B, mono-benzyl malonate<sup>5</sup> was coupled to quinol **1a** to give **3** in 63% yield after flash-column chromatography (3:1 hexanes–EtOAc). **IR** (thin film) 3036, 2983, 2937, 1734, 1666, 1630, 1328, 1266, 1149, 1152, 858 cm<sup>-1</sup>; **<sup>1</sup>H NMR** (300 MHz, CDCl<sub>3</sub>) δ 7.36 (s, 5 H), 6.78 (d, *J* = 10.2 Hz, 2 H), 6.20 (d, *J* = 10.2 Hz, 2 H), 5.18 (s, 2 H), 3.41 (s,

<sup>3</sup> Prepared according to: I. Navarro, J.-F. Basset, S. Hebbe, S. M. Major, T. Werner, C. Howsham, J. Bräckow, and A. G. M. Barret, *J. Am. Chem. Soc.* 2008, **130**, 10293.

<sup>4</sup> M. C. Carreño, M. González-López, and A. Urbano, *Angew. Chem. Int. Ed.* 2006, **45**, 2737.

<sup>5</sup> S. A.-L. Thetiot-Laurent, B. Nadal, and T. Le Gall, *Synthesis* 2010, 1697.

2 H), 1.49 (s, 3 H);  $^{13}\text{C}$  NMR (75 MHz,  $\text{CDCl}_3$ , DEPT)  $\delta$  184.9(C), 166.1(C), 164.9(C), 148.4 (CH  $\times$  2), 135.1(C), 128.8 (CH  $\times$  4), 128.7 (CH), 128.5 (CH  $\times$  2), 75.4(C), 67.5 ( $\text{CH}_2$ ), 41.9 ( $\text{CH}_2$ ), 26.2 ( $\text{CH}_3$ ); HRMS (ESI+) 323.0890 calcd for  $\text{C}_{17}\text{H}_{16}\text{O}_5\text{Na}$ , found 323.0898.

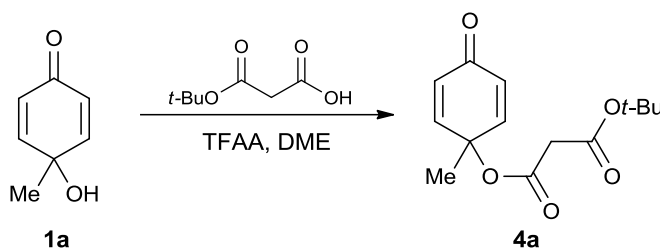

***tert*-Butyl (1-methyl-4-oxocyclohexa-2,5-dien-1-yl) malonate (4a).** Using general method B, mono-*tert*-butyl malonate<sup>6</sup> was coupled to quinol **1a** to give **4a** in 43% yield after flash-column chromatography (3:1 hexanes–EtOAc). IR (thin film) 2983, 2937, 1755, 1728, 1671, 1629, 1144, 1055, 854  $\text{cm}^{-1}$ ;  $^1\text{H}$  NMR (300 MHz,  $\text{C}_6\text{D}_6$ )  $\delta$  6.35 (d,  $J$  = 10.2 Hz, 2 H), 6.07 (d,  $J$  = 10.2 Hz, 2 H), 2.97 (s, 2 H), 1.30 (s, 9 H), 1.04 (s, 3 H);  $^{13}\text{C}$  NMR (75 MHz,  $\text{C}_6\text{D}_6$ , DEPT)  $\delta$  189.6 (C), 165.4 (C), 165.1 (C), 147.8 (CH  $\times$  2), 128.6 (CH  $\times$  2), 81.7 (C), 75.0 (C), 43.0 ( $\text{CH}_2$ ), 27.9 ( $\text{CH}_3 \times 3$ ), 25.9 ( $\text{CH}_3$ ); HRMS (ESI+) 289.1046 calcd for  $\text{C}_{14}\text{H}_{18}\text{O}_5\text{Na}$ , found 289.1059.

<sup>6</sup> Although this substrate is commercially available, it is also easily obtained by DCC coupling of malonic acid with 1 equiv of *t*-BuOH; see: R. Shelkov, M. Nahmany, and A. Melman, *J. Org. Chem.* **2002**, 67, 8975.



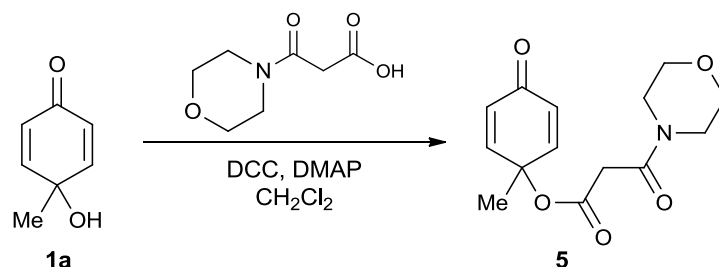

**1-Methyl-4-oxocyclohexa-2,5-dien-1-yl 3-morpholino-3-oxopropanoate (5).** Using general method C, mono-morpholine malonic acid<sup>7</sup> was coupled to quinol **1a** to give **5** in 96% yield after flash-column chromatography (2:1 hexanes–acetone). **IR** (thin film) 3497, 3288, 2925, 2856, 1744, 1657, 1444, 1313, 1230, 1052, 857  $\text{cm}^{-1}$ ; **<sup>1</sup>H NMR** (300 MHz,  $\text{CDCl}_3$ )  $\delta$  6.89 (d,  $J$  = 10.2 Hz, 2 H), 6.20 (d,  $J$  = 10.2 Hz, 2 H), 3.69–3.55 (m, 6 H), 3.40 (s, 2 H), 3.43–3.34 (m, 2 H) 1.54 (s, 3 H); **<sup>13</sup>C NMR** (75 MHz,  $\text{CDCl}_3$ , DEPT)  $\delta$  184.9 (C), 166.0 (C), 164.3 (C), 148.6 (CH  $\times$  2), 128.4 (CH  $\times$  2), 75.3 (C), 66.6 ( $\text{CH}_2$ ), 66.4 ( $\text{CH}_2$ ), 46.6 ( $\text{CH}_2$ ), 42.2 ( $\text{CH}_2$ ), 41.1 ( $\text{CH}_2$ ), 26.3 ( $\text{CH}_3$ ); **HRMS** (ESI+) 302.0999 calcd for  $\text{C}_{14}\text{H}_{17}\text{NO}_5\text{Na}$ , found 302.0990.

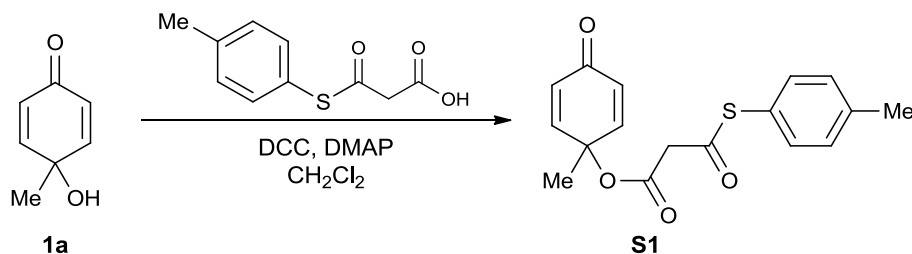

**1-Methyl-4-oxocyclohexa-2,5-dien-1-yl 2-(p-tolylthio)acetate (S1).** Using general method C, 2-(p-tolylthio)acetic acid<sup>8</sup> was coupled to **1a** to give sulfide **S1** in 65% yield after flash-column chromatography (3:1 hexanes–EtOAc). **IR** (thin film) 3022, 2779, 2924, 1739, 1668, 1631, 1269, 1134, 1052, 857  $\text{cm}^{-1}$ ; **<sup>1</sup>H NMR** (300 MHz,  $\text{CDCl}_3$ )  $\delta$  7.31 (d,  $J$  = 8.1 Hz, 2 H), 7.11 (d,  $J$  = 8.0 Hz, 2 H), 6.72 (d,  $J$  = 10.2 Hz, 2 H), 6.17 (d,  $J$  =

<sup>7</sup> (a) M. R. Angelastro, L. E. Baugh, P. Bey, J. P. Burkhart, T.-M. Chen, S. L. Durham, C. M. Hare, E. W. Huber, M. J. Janusz, J. R. Koehl, A. L. Marquart, S. Mehdi, and N. P. Peet, *J. Med. Chem.* 1994, **37**, 4538. (b) B. Rigo, D. Fasseur, P. Cauliez, and D. Couturier, *Tetrahedron Lett.* 1989, **30**, 3073.

<sup>8</sup> (a) Prepared according to W. J. Kenney, J. A. Walsh, and D. A. Davenport, *J. Am. Chem. Soc.* 1961, **83**, 4019. (b) Y. Nagao, S. Miyamoto, M. Miyamoto, H. Takeshige, K. Hayashi, S. Sano, M. Shiro, K. Yamaguchi, and Y. Sei, *J. Am. Chem. Soc.* 2006, **128**, 9722.

10.2 Hz, 2 H), 3.52 (s, 2 H), 2.31 (s, 3 H), 1.45 (s, 3 H); **<sup>13</sup>C NMR** (75 MHz, CDCl<sub>3</sub>, DEPT) δ 184.9 (C), 168.3 (C), 148.5 (CH × 2), 137.8 (C), 131.4 (CH × 2), 130.6 (C), 129.9 (CH × 2), 128.3 (CH × 2), 75.0 (C), 37.5 (CH<sub>2</sub>), 26.0 (CH<sub>3</sub>), 21.1 (CH<sub>3</sub>); **HRMS** (ESI+) 311.0712 calcd for C<sub>16</sub>H<sub>16</sub>O<sub>3</sub>SNa, found 311.0708.

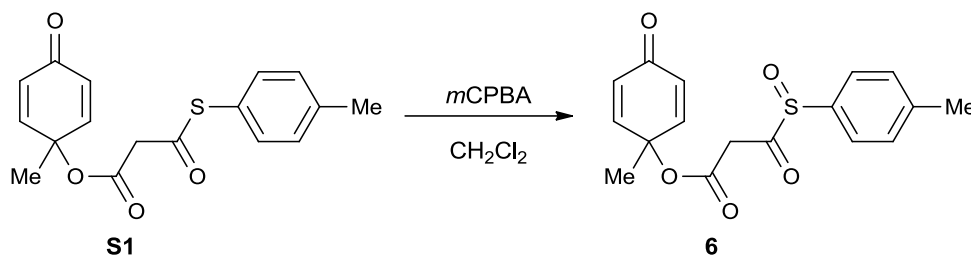

**1-Methyl-4-oxocyclohexa-2,5-dien-1-yl 2-tosylacetate (6).** Sulfide **S1** (89 mg, 0.30 mmol) was dissolved in CH<sub>2</sub>Cl<sub>2</sub> (5 mL) and treated with 77% *m*-chloroperbenzoic acid (207 mg, 0.9 mmol). The mixture was stirred for 2 h before being quenched with saturated aq. NaHCO<sub>3</sub> (10 mL). The phases were separated and the aqueous layer extracted with CH<sub>2</sub>Cl<sub>2</sub>. The combined organic layers were dried over Na<sub>2</sub>SO<sub>4</sub>, filtered, and concentrated to give **6** (87.3 mg, 88% yield) after flash-column chromatography (2:1→1:1 hexanes–EtOAc). **IR** (thin film) 3051, 2992, 2937, 1746, 1669, 1632, 1391, 1320, 1280, 1152, 1050, 859 cm<sup>-1</sup>; **<sup>1</sup>H NMR** (300 MHz, CDCl<sub>3</sub>) δ 7.76 (d, *J* = 8.3 Hz, 2 H), 7.35 (d, *J* = 8.4 Hz, 2 H), 6.78 (d, *J* = 10.2 Hz, 2 H), 6.18 (d, *J* = 10.2 Hz, 2 H), 4.07 (s, 2 H), 2.43 (s, 3 H), 1.50 (s, 3 H); **<sup>13</sup>C NMR** (75 MHz, CDCl<sub>3</sub>, DEPT) δ 184.7 (C), 160.9 (C), 147.5 (CH × 2), 145.8 (C), 135.7 (C), 130.0 (CH × 2), 128.7 (CH × 2), 128.5 (CH × 2), 76.3 (C), 61.4 (CH<sub>2</sub>), 25.9 (CH<sub>3</sub>), 21.8 (CH<sub>3</sub>); **HRMS** (ESI+) 343.0611 calcd for C<sub>16</sub>H<sub>16</sub>O<sub>5</sub>SNa, found 343.0616.

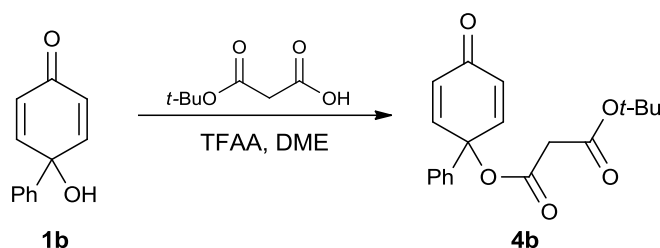

**tert-Butyl (4-oxo-1,4-dihydro-[1,1'-biphenyl]-1-yl) malonate (4b).** Using general method B, mono-*tert*-butyl malonate was coupled to quinol **1b**<sup>9</sup> to give **4b** in 36% yield after flash-column chromatography (4:1 hexanes–EtOAc). **IR** (thin film) 1729, 1670, 1625, 1325, 1135, 994, 842 cm<sup>-1</sup>; **<sup>1</sup>H NMR** (300 MHz, CDCl<sub>3</sub>) δ 7.47–7.30 (m, 5 H), 6.97 (d, *J* = 10.1 Hz, 2 H), 6.34 (d, *J* = 10.1 Hz, 2 H), 3.40 (s, 2 H), 1.48 (s, 9 H); **<sup>13</sup>C NMR** (75 MHz, CDCl<sub>3</sub>, DEPT) δ 185.5 (C), 165.3 (C), 165.0 (C), 147.1 (CH × 2), 136.1 (C), 129.2 (CH × 2), 129.0 (CH), 128.4 (CH × 2), 125.4 (CH × 2), 82.7 (C), 78.2 (C), 43.4 (CH<sub>2</sub>), 28.1 (CH<sub>3</sub> × 3); **HRMS** (ESI<sup>+</sup>) 351.1203 calcd for C<sub>19</sub>H<sub>20</sub>O<sub>5</sub>Na, found 351.1199.

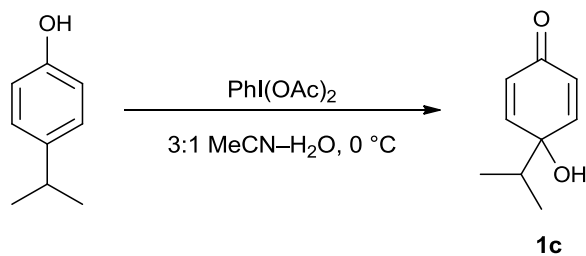

**4-Hydroxy-4-isopropylcyclohexa-2,5-dienone (1c).** Using general method A, 4-isopropyl phenol was converted into quinol **1c** in 73% yield after flash-column chromatography (3:1 hexanes–EtOAc). This compound has been prepared and characterized before;<sup>10</sup> however, our <sup>1</sup>H NMR spectrum differs from the literature data. **IR** (thin film) 3343, 2960, 1648, 1641, 1496, 1454, 1367, 1311, 1186, 1028, 968, 865, 774 cm<sup>-1</sup>; **<sup>1</sup>H NMR** (300 MHz, CDCl<sub>3</sub>) δ 6.80 (d, *J* = 10.2 Hz, 2 H), 6.14 (d, *J* = 10.2 Hz, 2 H), 3.14 (bs, 1 H), 1.96 (hept, *J* = 6.9 Hz, 1 H), 0.91 (d, *J* = 6.9 Hz, 6 H). **<sup>13</sup>C NMR** (75 MHz, CDCl<sub>3</sub>, DEPT) δ 186.3 (C), 151.1 (CH × 2),

<sup>9</sup> Prepared according to: F.-X. Felpin, *Tetrahedron Lett.* 2007, **48**, 409.

<sup>10</sup> J. McKinley, A. Aponick, J. C. Raber, C. Fritz, D. Montgomery, and C. T. Wigal, *J. Org. Chem.* 1997, **62**, 4874.

128.8 (CH × 2), 72.3 (C), 36.7 (CH), 17.0 (CH<sub>3</sub> × 2); **HRMS** (ESI+) 175.0740 calcd for C<sub>9</sub>H<sub>12</sub>O<sub>2</sub>Na, found 175.0741.

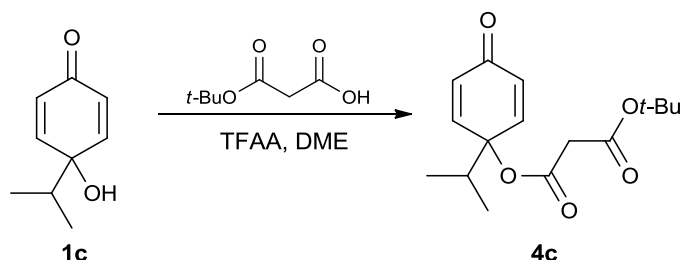

**tert-butyl (1-isopropyl-4-oxocyclohexa-2,5-dien-1-yl) malonate (4c).** Using general method B, mono-*tert*-butyl malonate was coupled to **1c** to give **4c** in 56% yield after flash-column chromatography (5:1 hexanes–EtOAc). **IR** (thin film) 2976, 2937, 2880, 1751, 1730, 1670, 1629, 1461, 1333, 1272, 1146, 1005 cm<sup>-1</sup>; **<sup>1</sup>H NMR** (300 MHz, CDCl<sub>3</sub>) δ 6.77 (d, *J* = 10.3 Hz, 2 H), 6.31 (d, *J* = 10.3 Hz, 2 H), 3.27 (s, 2 H), 2.11 (hept, *J* = 6.9 Hz, 1 H), 1.45 (s, 9 H), 0.93 (d, *J* = 6.9 Hz, 6 H); **<sup>13</sup>C NMR** (75 MHz, CDCl<sub>3</sub>, DEPT) δ 185.3 (C), 165.5 (C), 165.3 (C), 146.8 (CH × 2), 130.1 (CH × 2), 82.5 (C), 80.4 (C), 43.2 (CH<sub>2</sub>), 36.5 (CH), 28.0 (CH<sub>3</sub> × 3), 16.9 (CH<sub>3</sub>); **HRMS** (ESI+) 317.1359 calcd for C<sub>16</sub>H<sub>22</sub>O<sub>5</sub>Na, found 317.1417.

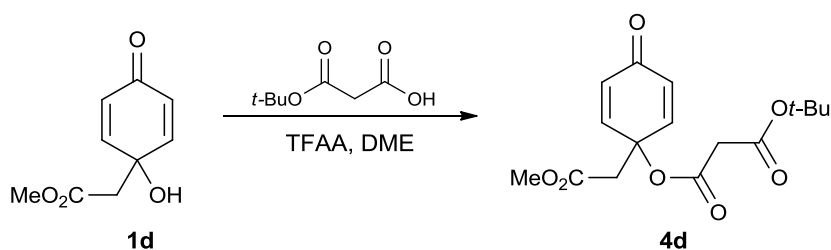

**tert-Butyl (1-(2-methoxy-2-oxoethyl)-4-oxocyclohexa-2,5-dien-1-yl) malonate (4d).** Using general method B, mono-*tert*-butyl malonate was coupled to jacaranone<sup>11</sup> (**1d**) to give **4d** in 38% yield after flash-column chromatography (3:1 hexanes–EtOAc). **IR** (thin film) 2980, 1734, 1672, 1633, 1333, 1249, 1154, 1032, 855 cm<sup>-1</sup>; **<sup>1</sup>H NMR** (300 MHz, CDCl<sub>3</sub>) δ 7.07 (d, *J* = 10.2 Hz, 2 H), 6.29 (d, *J* = 10.2 Hz, 2 H), 3.67 (s, 3 H), 3.26 (s,

<sup>11</sup> K. A. Parker and J. R. Andrade, *J. Org. Chem.* 1979, **44**, 3964.

2 H), 2.82 (s, 2 H), 1.44 (s, 9 H);  $^{13}\text{C}$  NMR (75 MHz,  $\text{CDCl}_3$ , DEPT)  $\delta$  184.7 (C), 168.0 (C), 165.1 (C), 146.2 (CH  $\times$  2), 129.4 (CH), 82.7 (C), 74.5 (C), 52.3 ( $\text{CH}_3$ ), 43.8 ( $\text{CH}_2$ ), 43.0 ( $\text{CH}_2$ ), 28.0 ( $\text{CH}_3 \times 3$ ); HRMS (ESI+) 347.1101 calcd for  $\text{C}_{16}\text{H}_{20}\text{O}_7\text{Na}$ , found 347.1126.

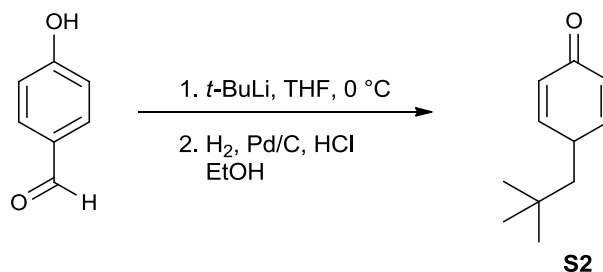

**4-neopentylphenol (S2).** A solution of 4-hydroxybenzaldehyde (1.0 g, 8.2 mmol) in THF (40 mL) was cooled to 0 °C and treated with *t*-BuLi (1.28 M in pentane, 14.0 mL, 18.0 mmol). The mixture was stirred for 1 h before being quenched with 10% aq. HCl (1 mL). The mixture was diluted with brine and acidified with 10% aq. HCl until a clear solution was obtained. Extraction with  $\text{Et}_2\text{O}$  followed by drying over  $\text{MgSO}_4$  and concentration gave a residue that was purified by flash-column chromatography (3:1 hexanes–EtOAc). Further purification was achieved by suspending the obtained solid in chloroform, followed by filtration to give 471 mg of the intermediate benzylic alcohol. This material was dissolved in EtOH (35 mL), treated with 100 mg Pd/C (10% w/w) and 1 drop of conc. HCl. The mixture was stirred under an atmosphere of  $\text{H}_2$  (balloon) for 14 h, then filtered through a short plug of Celite. Solvent was removed in vacuo and the residue purified by flash-column chromatography (19:1 hexanes–EtOAc) to give **S2** (387 mg, 24% yield over 2 steps). Identity was verified by comparison of  $^1\text{H}$  NMR spectrum with literature data.<sup>12</sup>

<sup>12</sup> R. B. Bates and T. J. Siahaan, *J. Org. Chem.* 1986, **51**, 1432.

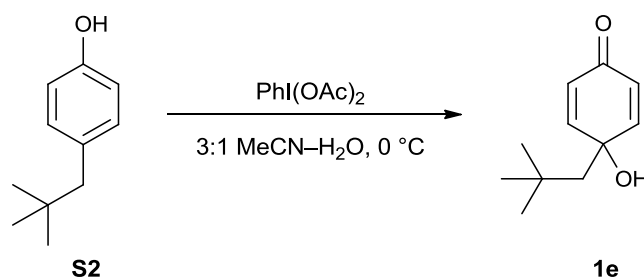

**4-Hydroxy-4-neopentylcyclohexa-2,5-dienone (1e).** Using general method A, phenol **S2** was converted into **1e** in 31% yield after flash-column chromatography (3:1 hexanes–EtOAc). **IR** (thin film) 3429, 2960, 2873, 1661, 1621, 1470, 1397, 1279, 1074  $\text{cm}^{-1}$ ;  **$^1\text{H}$  NMR** (300 MHz,  $\text{CDCl}_3$ )  $\delta$  6.91 (d,  $J = 10.1$  Hz, 2 H), 6.12 (d,  $J = 10.1$  Hz, 2 H), 2.42 (bs, 1 H), 1.85 (s, 2 H), 0.93 (s, 9 H);  **$^{13}\text{C}$  NMR** (75 MHz,  $\text{CDCl}_3$ , DEPT)  $\delta$  186.1 (C), 152.7 ( $\text{CH} \times 2$ ), 127.2 ( $\text{CH} \times 2$ ), 69.6 (C), 53.8 ( $\text{CH}_2$ ), 31.3 ( $\text{CH}_3 \times 3$ ), 30.9 (C); **HRMS** (ESI+) 203.1043 calcd for  $\text{C}_{11}\text{H}_{16}\text{O}_2\text{Na}$ , found 203.1059.

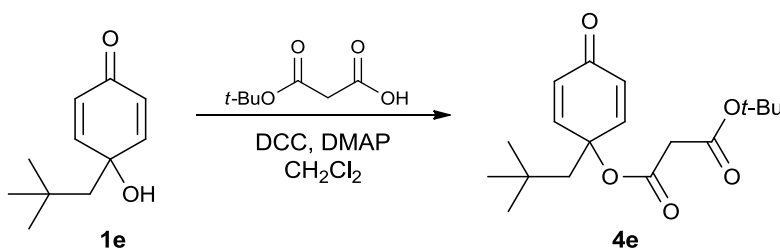

**tert-Butyl (1-neopentyl-4-oxocyclohexa-2,5-dien-1-yl) malonate (4e).** Using general method C, mono-*tert*-butyl malonate was coupled to quinol **1e** to give **4e** in quantitative yield after flash-column chromatography (5:1 hexanes–EtOAc). **IR** (thin film) 2976, 2935, 2870, 1732, 1671, 1630, 1368, 1331, 1143, 1046, 853  $\text{cm}^{-1}$ ;  **$^1\text{H}$  NMR** (300 MHz,  $\text{CDCl}_3$ )  $\delta$  6.99 (d,  $J = 10.2$  Hz, 2 H), 6.22 (d,  $J = 10.2$  Hz, 2 H), 3.24 (s, 2 H), 1.81 (s, 2 H), 1.44 (s, 9 H), 0.99 (s, 9 H);  **$^{13}\text{C}$  NMR** (75 MHz,  $\text{CDCl}_3$ , DEPT)  $\delta$  185.4 (C), 165.4 (C), 165.2 (C), 149.0 ( $\text{CH} \times 2$ ), 128.0 ( $\text{CH} \times 2$ ), 82.6 (C), 78.5 (C), 53.1 ( $\text{CH}_2$ ), 43.3 ( $\text{CH}_2$ ), 31.8 (C), 31.5 ( $\text{CH}_3 \times 3$ ), 28.0 ( $\text{CH}_3 \times 3$ ); **HRMS** (ESI+) 345.1672 calcd for  $\text{C}_{18}\text{H}_{26}\text{O}_5\text{Na}$ , found 345.1679.

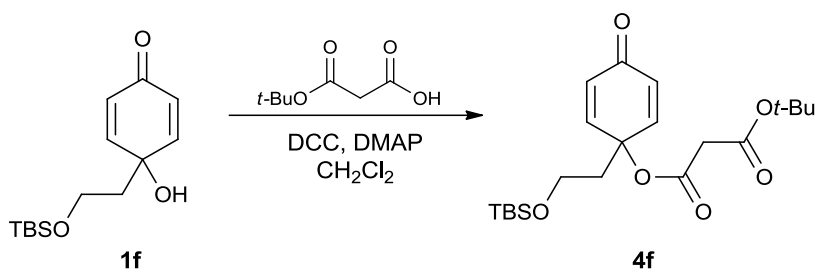

***tert*-Butyl (1-(2-((*tert*-butyldimethylsilyl)oxy)ethyl)-4-oxocyclohexa-2,5-dien-1-yl) malonate (4f).** Using general method C, mono-*tert*-butyl malonate was coupled to quinol **1f**<sup>13</sup> to give **4f** as a white solid in 74% yield after flash-column chromatography (10:1 hexanes/EtOAc). **IR** (thin film) 2955, 2929, 2857, 1757, 1730, 1674, 1632, 1258, 1148, 1100, 839, 778 cm<sup>-1</sup>; **<sup>1</sup>H NMR** (300 MHz, CDCl<sub>3</sub>) δ 6.93 (d, *J* = 10.2 Hz, 2 H), 6.24 (d, *J* = 10.2 Hz, 2 H), 3.72 (t, *J* = 6.1 Hz, 2 H), 3.27 (s, 2 H), 2.03 (t, *J* = 6.1 Hz, 2 H), 1.46 (s, 9 H), 0.85 (s, 9 H), 0.00 (s, 6 H); **<sup>13</sup>C NMR** (75 MHz, CDCl<sub>3</sub>, DEPT) δ 185.3 (C), 165.4 (C), 165.3 (C), 148.1 (CH × 2), 128.6 (CH × 2), 82.6 (C), 76.8 (C), 57.8 (CH<sub>2</sub>), 43.2 (CH<sub>2</sub>), 42.9 (CH<sub>2</sub>), 28.1 (CH<sub>3</sub> × 3), 25.9 (CH<sub>3</sub> × 3), 18.2 (C), -5.4 (CH<sub>3</sub> × 2); **HRMS** (ESI+) 433.2017 calcd for C<sub>21</sub>H<sub>34</sub>O<sub>6</sub>SiNa, found 433.2028.

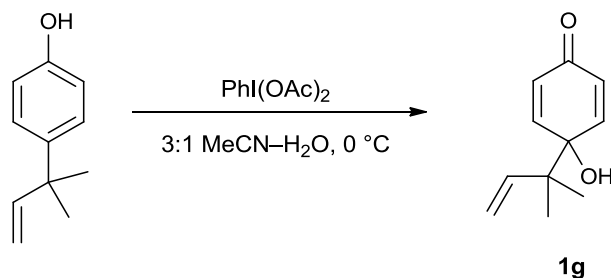

**4-Hydroxy-4-(2-methylpent-4-en-2-yl)cyclohexa-2,5-dienone (1g).** Using general procedure A, 4-(2-methylpent-4-en-2-yl)phenol<sup>14</sup> was converted into quinol **1g** in 37% yield after flash-column chromatography (3:1 hexanes–EtOAc). **IR** (thin film) 3398, 2970, 1667, 1620, 1385, 1463, 1173, 1063, 955, 916, 859 cm<sup>-1</sup>; **<sup>1</sup>H NMR** (300 MHz, CDCl<sub>3</sub>) δ 6.99 (d, *J* = 10.4 Hz, 2 H), 6.18 (d, *J* = 10.4 Hz, 2 H), 5.80 (ddt, *J* = 17.7, 10.3, 7.4 Hz, 1 H), 5.10–4.97 (m, 2 H), 2.66 (s, 1 H), 2.14 (d, *J* = 7.4 Hz, 1 H), 0.98 (s, 6 H); **<sup>13</sup>C NMR** (75 MHz,

<sup>13</sup> Prepared according to: Z. You, A. H. Hoveyda, and M. L. Snapper, *Ang. Chem. Int. Ed.* 2009, **48**, 547.

<sup>14</sup> J. A. Cella, *J. Org. Chem.* 1982, **47**, 2125.

$\text{CDCl}_3$ , DEPT)  $\delta$  185.7 (C), 150.5 (CH  $\times$  2), 134.8 (CH), 129.0 (CH  $\times$  2), 118.2 (CH<sub>2</sub>), 74.1 (C), 41.8 (C, overlapped), 41.8 (CH<sub>2</sub>), 21.9 (CH<sub>3</sub>  $\times$  2); **HRMS** (ESI+) 215.1043 calcd for C<sub>12</sub>H<sub>16</sub>O<sub>2</sub>Na, found 215.1059.

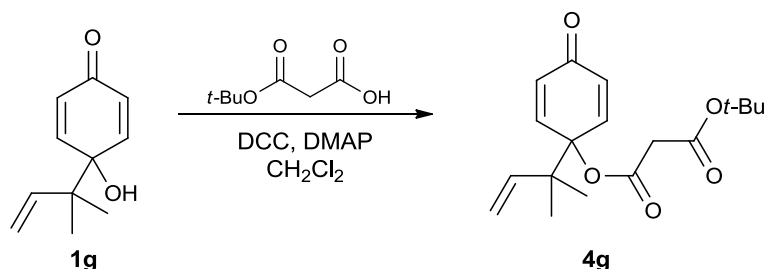

***tert*-Butyl (1-(2-methylpent-4-en-2-yl)-4-oxocyclohexa-2,5-dien-1-yl) malonate (4g).** Using general method C, mono-*tert*-butyl malonate was coupled to quinol **1g** to give **4g** in 50% yield after flash-column chromatography (3:1 hexanes–Et<sub>2</sub>O). **IR** (thin film) 2977, 2941, 1759, 1731, 1671, 1629, 1332, 1257, 1143, 1000, 914, cm<sup>-1</sup>; **<sup>1</sup>H NMR** (300 MHz, CDCl<sub>3</sub>)  $\delta$  6.88 (d,  $J$  = 10.3 Hz, 2 H), 6.35 (d,  $J$  = 10.3 Hz, 2 H), 5.75 (ddt,  $J$  = 17.3, 10.0, 7.4 Hz, 1 H), 5.07 (d,  $J$  = 10.3 Hz, 1 H), 5.02 (d,  $J$  = 17.2 Hz, 1 H) 3.31 (s, 2 H), 2.15 (d,  $J$  = 7.4 Hz, 2 H), 1.47 (s, 9 H), 0.98 (s, 6 H); **<sup>13</sup>C NMR** (75 MHz, CDCl<sub>3</sub>, DEPT)  $\delta$  185.0 (C), 165.5 (C), 165.2 (C), 146.9 (CH  $\times$  2), 134.0 (CH), 130.4 (CH  $\times$  2); 118.6 (CH<sub>2</sub>), 82.7 (C), 82.0 (C), 43.3 (C), 43.2 (CH<sub>2</sub>), 41.5 (CH<sub>2</sub>), 28.1 (CH<sub>3</sub>  $\times$  3), 21.9 (CH<sub>3</sub>  $\times$  2); **HRMS** (ESI+) 357.1672 calcd for C<sub>19</sub>H<sub>26</sub>O<sub>5</sub>Na, found 357.1690.

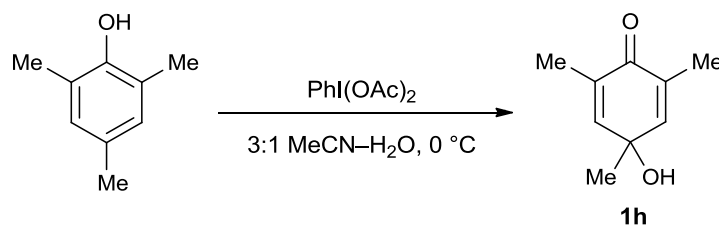

**4-Hydroxy-2,4,6-trimethylcyclohexa-2,5-dienone (1h).** Using general method A, 2,4,6-trimethylphenol was converted into **1h** in 78% yield after flash-column chromatography (4:1→3:1 hexanes–EtOAc). Identity was verified by comparison of <sup>1</sup>H NMR spectrum with literature data.<sup>4,15</sup>

<sup>15</sup> M. Ochiai, K. Miyamoto, M. Shiro, T. Ozawa, and K. Yamaguchi, *J. Am. Chem. Soc.* 2003, **125**, 13006.



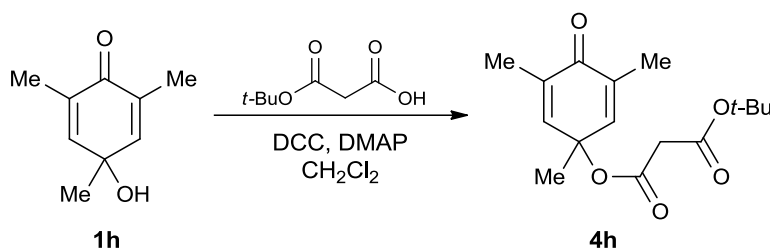

**tert-Butyl (1,3,5-trimethyl-4-oxocyclohexa-2,5-dien-1-yl) malonate (4h).** Using general method C, mono-*tert*-butyl malonate was coupled to quinol **1h** to give **4h** in quantitative yield after flash-column chromatography (9:1 hexanes–EtOAc). **IR** (thin film) 2979, 2930, 1731, 1679, 1644, 1370, 1333, 1144, 1048, 971, 847  $\text{cm}^{-1}$ ;  **$^1\text{H}$  NMR** (300 MHz,  $\text{CDCl}_3$ )  $\delta$  6.65 (s, 2 H), 3.22 (s, 2 H), 1.87 (s, 6 H), 1.52 (s, 3 H), 1.45 (s, 9 H);  **$^{13}\text{C}$  NMR** (75 MHz,  $\text{CDCl}_3$ , DEPT)  $\delta$  186.4 (C), 165.7 (C), 165.5 (C), 143.4 ( $\text{CH} \times 2$ ), 134.9 ( $\text{C} \times 2$ ), 82.3 (C), 75.9 (C), 43.5 ( $\text{CH}_2$ ), 28.1 ( $\text{CH}_3 \times 3$ ), 26.4 ( $\text{CH}_3$ ), 16.0 ( $\text{CH}_3 \times 2$ ); **HRMS** (ESI+) 317.1359 calcd for  $\text{C}_{16}\text{H}_{22}\text{O}_5\text{Na}$ , found 317.1373.

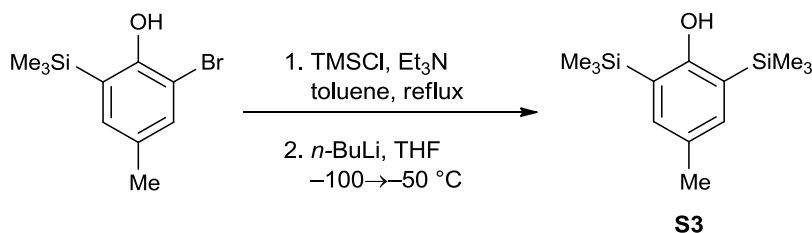

**4-Methyl-2,6-bis(trimethylsilyl)phenol (S3).** A mixture of 2-bromo-4-methyl-6-(trimethylsilyl)phenol<sup>16</sup> (660 mg, 2.54 mmol), TMSCl (0.64 mL, 5.1 mmol) and  $\text{Et}_3\text{N}$  (0.71 mL, 5.1 mmol) was dissolved in toluene (20 mL) and refluxed for 12 h. The mixture was then allowed to cool to r.t. and concentrated. Full conversion of the phenol to the TMS ether was confirmed by  $^1\text{H}$  NMR analysis. The residue was then dissolved in 20 mL THF and cooled to  $-100^\circ\text{C}$ .  $n\text{-BuLi}$  (2.5 M in hexanes, 1.01 mL, 2.54 mmol) was added and the mixture was allowed to gradually warm to  $-50^\circ\text{C}$ , at which point it was quenched with saturated aq.  $\text{NH}_4\text{Cl}$  (1 mL). The cooling bath was removed and the mixture was diluted with  $\text{Et}_2\text{O}$ , washed with brine, dried over  $\text{MgSO}_4$ ,

<sup>16</sup> S. Akai, T. Ikawa, S.-i. Takayanagi, Y. Morikawa, S. Mohri, M. Tsubakiyama, M. Egi, Y. Wada, and Y. Kita, *Angew. Chem. Int. Ed.* 2008, **47**, 7673.

filtered, and concentrated. Flash-column chromatography (100% petroleum ether) afforded phenol **S3** (564.2 mg, 87% yield over 2 steps). **IR** (thin film) 3599, 2951, 1572, 1403, 1241, 1169, 832  $\text{cm}^{-1}$ ;  **$^1\text{H}$  NMR** (300 MHz,  $\text{CDCl}_3$ )  $\delta$  7.17 (s, 2 H), 4.85 (s, 1 H), 2.29 (s, 3 H), 0.34 (s, 18 H);  **$^{13}\text{C}$  NMR** (75 MHz,  $\text{CDCl}_3$ , DEPT)  $\delta$  163.4 (C), 137.3 ( $\text{CH} \times 2$ ), 129.2 (C), 124.1 ( $\text{C} \times 2$ ), 20.8 ( $\text{CH}_3$ ),  $-0.3$  ( $\text{CH}_3 \times 6$ ); **HRMS** (ESI $^-$ ) 251.1282 calcd for  $\text{C}_{13}\text{H}_{23}\text{OSi}_2$ , found 251.0992.

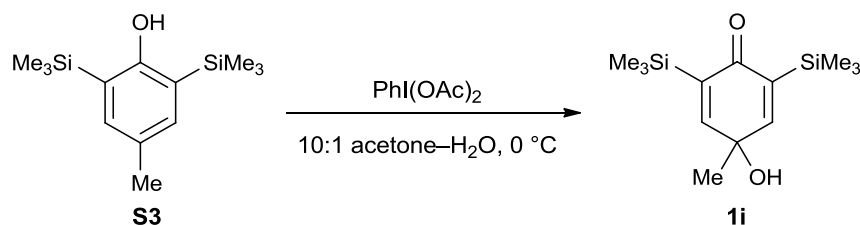

**4-Hydroxy-4-methyl-2,6-bis(trimethylsilyl)cyclohexa-2,5-dienone (1i).** Using a modification of general method A in which 10:1 acetone– $\text{H}_2\text{O}$  was used as solvent, **S3** was converted into **1i** in 67% yield after flash-column chromatography (19:1 hexanes–EtOAc). **IR** (thin film) 3464, 1619, 1351, 1246, 1032, 841, 740  $\text{cm}^{-1}$ ;  **$^1\text{H}$  NMR** (300 MHz,  $\text{CDCl}_3$ )  $\delta$  6.97 (s, 2 H), 1.84 (bs, 1 H), 1.42 (s, 3 H), 0.17 (s, 18 H);  **$^{13}\text{C}$  NMR** (75 MHz,  $\text{CDCl}_3$ , DEPT)  $\delta$  190.9 (C), 158.7 ( $\text{CH} \times 2$ ), 140.2 ( $\text{C} \times 2$ ), 66.6 (C), 27.3 ( $\text{CH}_3$ ),  $-1.3$  ( $\text{CH}_3 \times 6$ ); **HRMS** (ESI $^+$ ) 291.1207 calcd for  $\text{C}_{13}\text{H}_{24}\text{O}_2\text{Si}_2\text{Na}$ , found 291.1209.

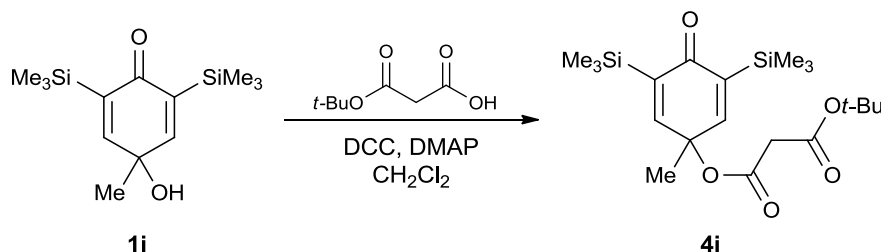

**tert-Butyl (1-methyl-4-oxo-3,5-bis(trimethylsilyl)cyclohexa-2,5-dien-1-yl) malonate (4i)** Using general method C, mono-*tert*-butyl malonate was coupled to quinol **1i** to give **4i** in 86% yield after flash-column chromatography (19:1 hexanes–EtOAc). **IR** (thin film) 2953, 1725, 1630, 1313, 1244, 1157, 1047, 843  $\text{cm}^{-1}$ ;  **$^1\text{H}$  NMR** (300 MHz,  $\text{CDCl}_3$ )  $\delta$  6.99 (s, 2 H), 3.26 (s, 2 H), 1.50 (s, 3 H), 1.47 (s, 9 H), 0.16 (s, 18 H);  **$^{13}\text{C}$  NMR**

(75 MHz, CDCl<sub>3</sub>, DEPT)  $\delta$  190.7 (C), 165.5(C), 165.3(C), 155.1 (CH  $\times$  2), 140.9 (C  $\times$  2), 82.2 (C), 75.3 (C), 43.5 (CH<sub>2</sub>), 28.1 (CH<sub>3</sub>  $\times$ 3), 26.6 (CH<sub>3</sub>), -1.3 (CH<sub>3</sub>  $\times$ 6); **HRMS** (ESI+) 433.1837 calcd for C<sub>20</sub>H<sub>34</sub>O<sub>5</sub>Si<sub>2</sub>Na, found 433.1853.

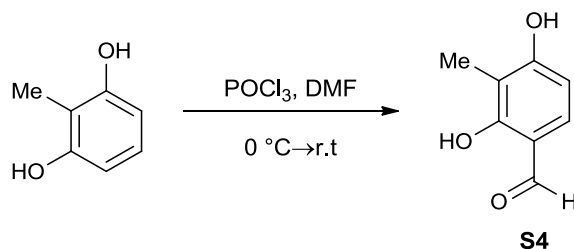

**2,4-Dihydroxy-3-methylbenzaldehyde (S4).** Phosphorous oxychloride (83 mL, 0.89 mol) was added dropwise to DMF (250 mL) at 0 °C. This was transferred via cannula to a solution of 2-methylresorcinol (50.0 g, 0.40 mol) in DMF (250 mL) at 0 °C. The reaction was stirred for 1.5 h, gradually warming to r.t. The mixture was then cooled to 0 °C and quenched with 2 M NaOH until pH 6. The product was extracted with EtOAc and concentrated. The resulting residue was recrystallized from hot 10% IPA–H<sub>2</sub>O to give **S4** (30.30 g) as beige crystalline needles. A second crop of crystals yielded an additional 6.99 g for a total of 37.29 g (61% yield). **mp** 153.0–154.4 °C (uncorrected); **IR** (neat): 3276, 2780, 1622, 1596, 1493, 1435, 1306, 1251, 1217, 1095 cm<sup>-1</sup>; **<sup>1</sup>H NMR** (300 MHz, CDCl<sub>3</sub>)  $\delta$  11.67 (s, 1 H), 9.69 (s, 1 H), 7.29 (d, *J* = 8.5 Hz, 1 H), 6.47 (d, *J* = 8.5 Hz, 1 H), 5.62 (s, 1 H), 2.14 (s, 3 H); **<sup>13</sup>C NMR** (75 MHz, CDCl<sub>3</sub>)  $\delta$  194.8, 162.4, 161.2, 133.1, 115.3, 111.2, 108.2, 7.2; **HRMS** (ESI+) 151.0390 calcd for C<sub>8</sub>H<sub>7</sub>O<sub>3</sub>, found 151.0399.

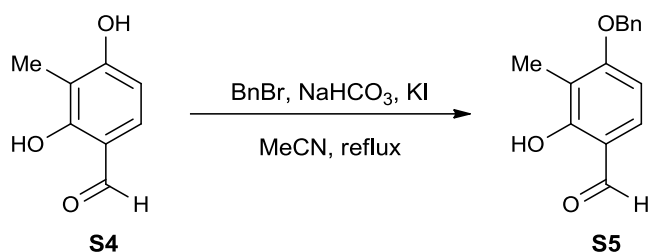

**4-(Benzyloxy)-2-hydroxy-3-methylbenzaldehyde (S5).** A literature procedure was adapted.<sup>17</sup> 2,4-Dihydroxy-3-methylbenzaldehyde (**S4**) (30.0 g, 0.197 mol), sodium bicarbonate (18.88 g, 0.23 mol), and KI (6.54 g, 0.039 mol) were dissolved in MeCN (500 mL). The flask was fitted with a reflux condenser and slowly warmed to 60 °C. At this time, the benzyl bromide (28.3 mL, 0.236 mol) was added and the mixture was warmed to 80 °C. After refluxing overnight, KHCO<sub>3</sub> (9.86 g, 0.099 mol) was added and the mixture was stirred for an additional 5 h, then cooled to r.t. and concentrated. The residue was quenched with 10% aq. HCl (100 mL) and extracted with EtOAc. The combined organic layers were washed with brine, dried with Na<sub>2</sub>SO<sub>4</sub>, filtered, and concentrated. The resulting oil was purified by flash-column chromatography using 100% hexanes until removal of benzyl bromide, then 6:1 hexanes–EtOAc to afford a **S5** as a yellow solid (46.89 g, 98% yield). **IR** (thin film, NaCl) 3030, 2923, 2839, 1641, 1626, 1498, 1289, 1250, 1111 cm<sup>-1</sup>; **<sup>1</sup>H NMR** (300 MHz, CDCl<sub>3</sub>) δ 11.47 (s, 1 H), 9.71 (s, 1 H), 7.42–7.34 (m, 6 H), 6.61 (d, *J* = 8.7, 1H), 5.19 (s, 2 H), 2.17 (s, 3 H); **<sup>13</sup>C NMR** (75 MHz, CDCl<sub>3</sub>) δ 194.9, 163.5, 161.3, 136.4, 133.3, 128.8, 128.3, 127.2, 115.6, 104.4, 104.2, 70.4, 7.7; **MS** (CI, CH<sub>4</sub>) 243.1016 calcd for C<sub>15</sub>H<sub>15</sub>O<sub>3</sub>, found 243.1031.

<sup>17</sup> W. L. Mendelson, M. Holmes, and J. Dougherty, *Synth. Commun.* 1996, **26**, 593.

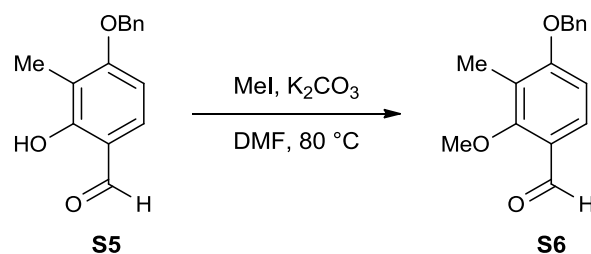

**4-(Benzyloxy)-2-methoxy-3-methylbenzaldehyde (S6).** To a solution of benzaldehyde **S5** (18.5 g, 0.076 mol) in DMF (300 mL) was added  $K_2CO_3$  (31.7 g, 0.229 mol) and MeI (5.14 mL, 0.826 mol). The flask was fitted with a reflux condenser and the solution was heated to 80 °C for 3 hours. The reaction was then cooled to r.t., poured onto  $H_2O$  and extracted with  $Et_2O$ . The combined organic layers were washed with  $H_2O$ , 10% aq. NaOH and brine; dried over  $MgSO_4$ ; filtered; and concentrated to obtain **S6** as a yellow solid (19.1 g, 97% yield). **IR** (neat) 2934, 2861, 1678, 1591, 1277, 1256, 1100  $cm^{-1}$ ;  **$^1H$  NMR** (300 MHz,  $CDCl_3$ )  $\delta$  10.24 (s, 1 H), 7.73 (d,  $J = 8.7$  Hz, 1 H), 7.46–7.32 (m, 5 H), 6.81 (d,  $J = 8.7$  Hz, 1 H), 5.16 (s, 2 H), 3.87 (s, 3 H), 2.23 (s, 3 H);  **$^{13}C$  NMR** (75 MHz,  $CDCl_3$ )  $\delta$  189.3, 163.2, 162.8, 136.4, 128.8, 128.3, 128.0, 127.3, 123.1, 120.7, 107.9, 70.4, 63.4, 8.9; **HRMS** (ESI+) 279.0992 calcd for  $C_{16}H_{16}NaO_3$ , found 279.0986.

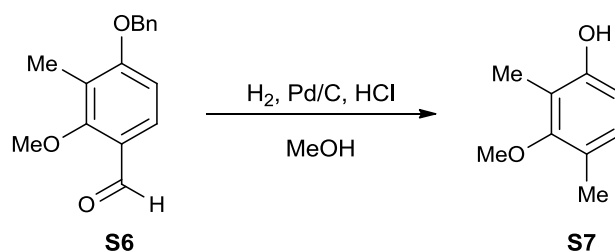

**3-Methoxy-2,4-dimethylphenol (S7).** Benzaldehyde **S6** (15.0 g, 58.5 mmol) 10% Pd/C<sup>18</sup> (3 mol %, 3.2 g) were suspended in MeOH (250 mL) and placed under a  $H_2$  atmosphere (balloon). The mixture was stirred for 3 h. After such time, 1 drop of conc. HCl was added and the reaction was stirred overnight. The mixture was then filtered through a pad of Celite and concentrated. The crude residue was purified by flash-column chromatography (3:1 hexanes–EtOAc) to give **S7** as a pale yellow crystalline solid (8.6 g, 96% yield). **IR** (neat)

<sup>18</sup> Pd/C catalyst obtained from Johnson Matthey (56%  $H_2O$ , Type 10R39).

3388, 2940, 2861, 1603, 1496, 1469, 1411, 1285, 1079, 999  $\text{cm}^{-1}$ ;  $^1\text{H NMR}$  (500 MHz,  $\text{CDCl}_3$ )  $\delta$  6.87 (d,  $J$  = 8.1 Hz, 1 H), 6.50 (d,  $J$  = 8.2, 1 H), 4.58 (s, H), 3.71 (s, 3 H), 2.21 (s, 3 H), 2.18 (s, 3 H);  $^{13}\text{C NMR}$  (75 MHz,  $\text{CDCl}_3$ )  $\delta$  157.5, 153.0, 128.2, 122.9, 117.4, 110.8, 60.1, 15.8, 9.0; **HRMS** (CI,  $\text{CH}_4$ ) 153.0910 calcd for  $\text{C}_9\text{H}_{13}\text{O}_2$ , found 153.0930.

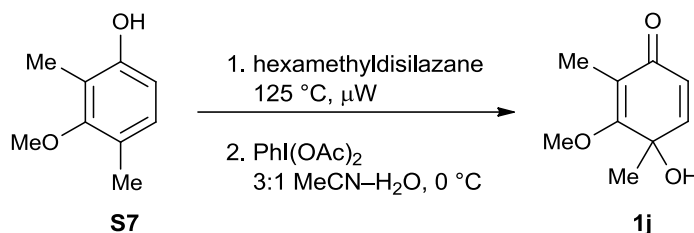

**4-Hydroxy-3-methoxy-2,4-dimethylcyclohexa-2,5-dienone (1j).** A mixture of phenol **S7** (53 mmol, 8.0 g) and hexamethyldisilazane (17 mL) was heated at 125  $^\circ\text{C}$  for 10 minutes in a microwave reactor.<sup>19</sup> General method A was then used to convert the resulting TMS phenol to quinol **1j** in 80% yield after flash-column chromatography (1:0→1:1 hexanes–EtOAc). **IR** (neat) 3391, 2981, 2932, 2851, 1662, 1608, 1456, 1214, 1094  $\text{cm}^{-1}$ ;  $^1\text{H NMR}$  (300 MHz,  $\text{CDCl}_3$ )  $\delta$  6.66 (d,  $J$  = 9.9 Hz, 1 H), 6.09 (d,  $J$  = 9.9 Hz, 1 H), 4.02 (s, 3 H), 2.61 (s, 1 H), 1.87 (s, 3 H), 1.51 (s, 3 H);  $^{13}\text{C NMR}$  (75 MHz,  $\text{CDCl}_3$ , DEPT)  $\delta$  188.5 (C), 171.5 (C), 147.8 (CH), 126.5 (CH), 117.5 (C), 69.8 (C), 61.7 ( $\text{CH}_3$ ), 26.5 ( $\text{CH}_3$ ), 9.2 ( $\text{CH}_3$ ); **HRMS** (ESI+) 191.0679 calcd for  $\text{C}_9\text{H}_{12}\text{NaO}_3$ , found 191.0674.

<sup>19</sup> M. M. Mojtahedi, M. R. Saidi, M. Bolourtchian, and M. M. Heravi, *Phosphorus, Sulfur Silicon Relat. Elem.* 2002, **177**, 289.

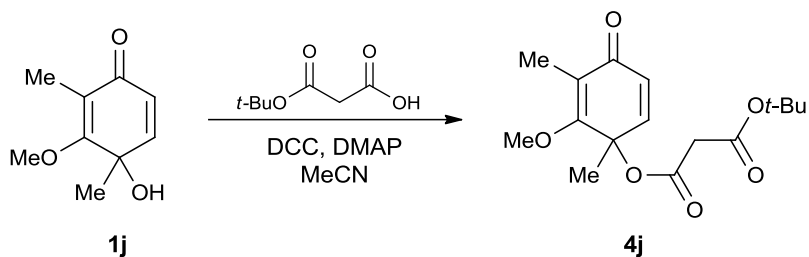

***tert*-Butyl (2-methoxy-1,3-dimethyl-4-oxocyclohexa-2,5-dien-1-yl) malonate (4j).** Using a modification of general method C, in which MeCN was used as solvent, mono-*tert*-butyl malonate was coupled to quinol **1j** to give **4j** in 98% yield (3:1 hexanes–EtOAc). **IR** (neat) 2987, 2922, 1753, 1730, 1665, 1614, 1321, 1143, 1056 cm<sup>-1</sup>; **<sup>1</sup>H NMR** (300 MHz, CDCl<sub>3</sub>) δ 6.61 (d, *J* = 10.0 Hz, 1H), 6.22 (d, *J* = 10.0 Hz, 1 H), 3.91 (s, 3 H), 3.29 (s, 2 H), 1.92 (s, 3 H), 1.56 (s, 3 H), 1.48 (s, 9 H); **<sup>13</sup>C NMR** (75 MHz, CDCl<sub>3</sub>) δ 187.7, 170.1, 165.40, 165.35, 144.4, 128.0, 118.2, 82.4, 76.6, 61.5, 43.1, 28.1, 25.4, 9.7; **HRMS** (ESI<sup>+</sup>) 333.1309 calcd for C<sub>16</sub>H<sub>22</sub>NaO<sub>6</sub>, found 333.1307.

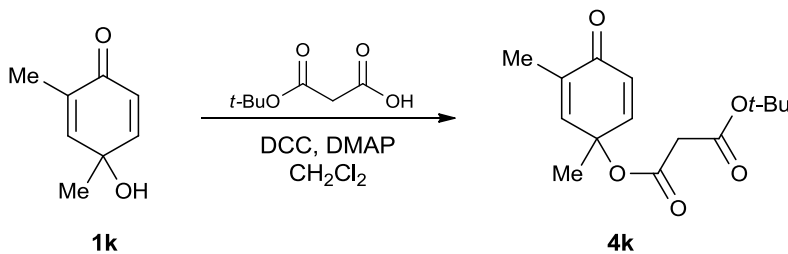

***tert*-Butyl (1,3-dimethyl-4-oxocyclohexa-2,5-dien-1-yl) malonate (4k).** Using general method C, mono-*tert*-butyl malonate was coupled to quinol **1k**<sup>4</sup> to give **4k**, in 95% yield (9:1 hexanes–EtOAc). **IR** (thin film) 2980, 1753, 1730, 1673, 1645, 1369, 1333, 1144, 1051, 969 cm<sup>-1</sup>; **<sup>1</sup>H NMR** (300 MHz, CDCl<sub>3</sub>) δ 6.82 (dd, *J* = 10.1, 3.2 Hz, 1 H), 6.61 (dq, *J* = 3.2, 1.4 Hz, 1 H), 6.15 (d, *J* = 10.1 Hz, 1 H), 3.19 (s, 3 H), 1.82 (d, *J* = 1.4 Hz, 3 H), 1.48 (s, 3 H), 1.40 (s, 9 H); **<sup>13</sup>C NMR** (75 MHz, CDCl<sub>3</sub>, DEPT) δ 185.5 (C), 165.4 (C), 165.3 (C), 148.3 (CH), 143.6 (CH), 135.1 (C), 128.1 (CH), 82.2 (C), 75.6 (C), 43.1 (CH<sub>2</sub>), 27.9 (CH<sub>3</sub> × 3), 26.2 (CH<sub>3</sub>), 15.6 (CH<sub>3</sub>); **HRMS** (ESI<sup>+</sup>) 303.1203 calcd for C<sub>15</sub>H<sub>20</sub>O<sub>5</sub>Na, found 303.1196.

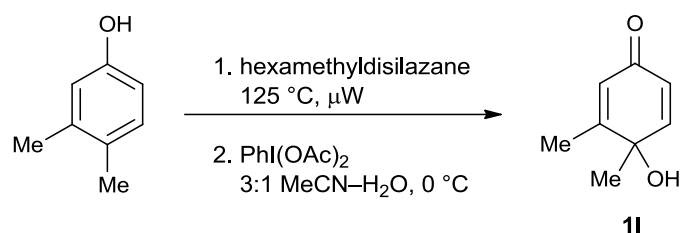

**4-Hydroxy-3,4-dimethylcyclohexa-2,5-dienone (11).** A mixture of 3,4-dimethylphenol (8.84 mmol, 1.08 g) and hexamethyldisilazane (2 mL) was heated at 125 °C for 10 min in a microwave reactor.<sup>19</sup> General method A was then used to convert the resulting TMS phenol to quinol **11** in 48% yield (two steps) after flash-column chromatography (1:0→1:1 hexanes–EtOAc). Identity was verified by comparison of <sup>1</sup>H NMR spectrum with literature data.<sup>4</sup>

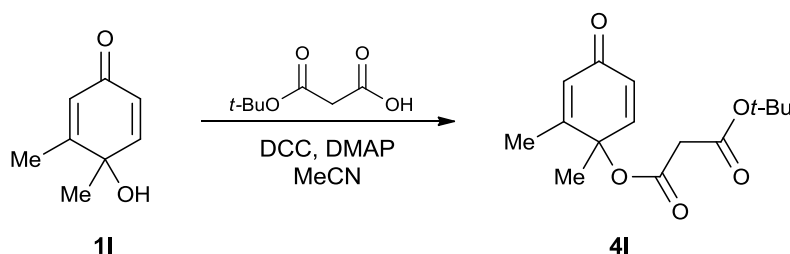

***tert*-Butyl (1,2-dimethyl-4-oxocyclohexa-2,5-dien-1-yl) malonate (41).** Using a modification of general method C, in which MeCN was used as solvent, mono-*tert*-butyl malonate was coupled to quinol **11** to give **41**, in 73% yield (9:1 hexanes–EtOAc). **IR** (neat) 2979, 2932, 1753, 1729, 1670, 1635, 1142, 1958 cm<sup>-1</sup>; **<sup>1</sup>H NMR** (300 MHz, CDCl<sub>3</sub>) δ 6.83 (d, *J* = 10.1, 1 H), 6.21 (dd, *J* = 1.9, 10.0, 1 H), 6.10–6.08 (m, 1 H), 3.29 (s, 2 H), 1.97 (d, *J* = 1.4 Hz, 3 H), 1.51 (s, 3 H), 1.47 (s, 9 H); **<sup>13</sup>C NMR** (75 MHz, CDCl<sub>3</sub>, DEPT) δ 185.4 (C), 165.4 (C), 165.1 (C), 158.7 (C), 149.2 (CH), 128.2 (CH), 127.0 (CH), 82.6 (C), 77.3 (C), 43.0 (CH<sub>2</sub>), 28.1 (CH<sub>3</sub> × 3), 26.3 (CH<sub>3</sub>), 17.9 (CH<sub>3</sub>); **HRMS** (ESI+) 303.1203 calcd for C<sub>15</sub>H<sub>20</sub>O<sub>5</sub>Na, found 303.1206.



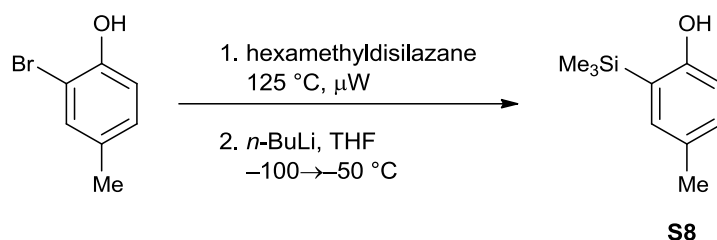

**4-Methyl-2-(trimethylsilyl)phenol (S8).** A solution of 2-bromo-4-methyl phenol (500 mg, 2.67 mmol) in 1 mL of hexamethyldisilazane was heated at 125 °C for 20 min in a microwave reactor.<sup>19</sup> After excess hexamethyldisilazane was removed in vacuo, the resulting TMS ether was dissolved in 15 mL of dry THF and cooled to -100 °C. *n*-BuLi (2.5 M in hexanes, 1.06 mL, 2.65 mmol) was added slowly, then the mixture was allowed to warm to -50 °C. The reaction was then quenched with saturated aq. NH<sub>4</sub>Cl (10 mL). The cooling bath was removed and the mixture was diluted with Et<sub>2</sub>O, washed with brine, dried over MgSO<sub>4</sub>, filtered, and concentrated. Flash-column chromatography (95:5 hexanes–EtOAc) afforded phenol **S8** (343.1 mg, 62% yield over 2 steps). **IR** (thin film) 3533, 2953, 1599, 1490, 1389, 1244, 1181, 1073, 890, 839 cm<sup>-1</sup>; **<sup>1</sup>H NMR** (300 MHz, CDCl<sub>3</sub>) δ 7.16 (d, *J* = 1.7 Hz, 1 H), 7.04 (dd, *J* = 8.1, 2.3 Hz, 1 H), 6.59 (d, *J* = 8.1, 1 H), 4.62 (s, 1 H), 2.29 (s, 3 H), 0.31 (s, 9 H); **<sup>13</sup>C NMR** (75 MHz, CDCl<sub>3</sub>, DEPT) δ 158.3 (C), 135.8 (CH), 131.2 (CH), 129.5 (C), 125.2 (C), 114.5 (CH), 20.7 (CH<sub>3</sub>), -0.8 (CH<sub>3</sub> × 3); **HRMS** (ESI-) 179.0887 calcd for C<sub>10</sub>H<sub>15</sub>OSi, found 179.1305.

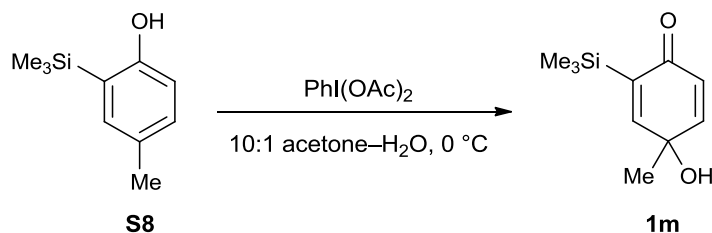

**4-Hydroxy-4-methyl-2-(trimethylsilyl)cyclohexa-2,5-dienone (1m).** Using a modification of general method A in which 10:1 acetone–H<sub>2</sub>O was used as solvent, phenol **S8** was converted into quinol **1m** in 51% yield after flash-column chromatography (5:1 hexanes–EtOAc). **IR** (thin film) 3381, 2958, 1649, 1611, 1361, 1242, 1138, 1050, 841 cm<sup>-1</sup>; **<sup>1</sup>H NMR** (300 MHz, CDCl<sub>3</sub>) δ 6.99 (d, *J* = 3.1 Hz, 1 H), 6.83 (dd, *J* = 10.0, 3.1 Hz,

1 H), 2.12 (bs, 1 H), 1.44 (s, 3 H), 0.17 (s, 9 H);  $^{13}\text{C}$  NMR (75 MHz,  $\text{CDCl}_3$ , DEPT)  $\delta$  188.5 (C), 160.0 (CH), 151.7 (CH), 139.0 (C), 127.8 (CH), 66.8 (C), 27.0 ( $\text{CH}_3$ ), -1.4 ( $\text{CH}_3 \times 3$ ); HRMS (ESI+) 219.0812 calcd for  $\text{C}_{10}\text{H}_{16}\text{O}_2\text{SiNa}$ , found 219.0825.

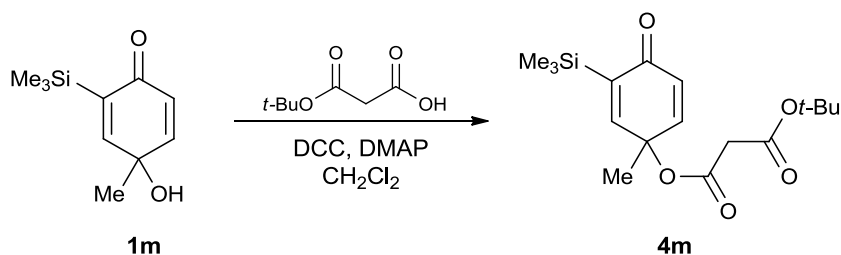

**tert-Butyl (1-methyl-4-oxo-3-(trimethylsilyl)cyclohexa-2,5-dien-1-yl) malonate (4m).** Using general method C, mono-*tert*-butyl malonate was coupled to quinol **1m** to give **4m** in 82% yield after flash-column chromatography (9:1 hexanes–EtOAc). IR (thin film) 2978, 1754, 1732, 1657, 1628, 1369, 1333, 1248, 1140, 1055, 845  $\text{cm}^{-1}$ ;  $^1\text{H}$  NMR (300 MHz,  $\text{CDCl}_3$ )  $\delta$  6.94 (d,  $J = 3.1$  Hz, 1 H), 6.85 (dd,  $J = 10.0, 3.1$  Hz, 1 H), 6.15 (d,  $J = 10.0$  Hz, 1 H), 3.23 (s, 2 H), 1.50 (s, 3 H), 1.43 (s, 9 H), 0.14 (s, 9 H);  $^{13}\text{C}$  NMR (75 MHz,  $\text{CDCl}_3$ , DEPT)  $\delta$  187.8 (C), 165.4 (C), 165.3 (C), 155.6 (CH), 147.6 (CH), 140.4 (C), 129.0 (CH), 82.3 (C), 75.2 (C), 43.3 ( $\text{CH}_2$ ), 28.0 ( $\text{CH}_3 \times 3$ ), 26.4 ( $\text{CH}_3$ ), -1.5 ( $\text{CH}_3 \times 3$ ); HRMS (ESI+) 361.1442 calcd for  $\text{C}_{17}\text{H}_{26}\text{O}_5\text{SiNa}$ , found 361.1443.

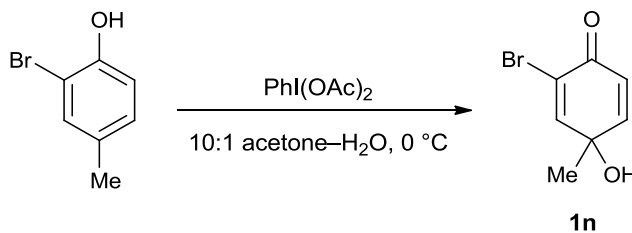

**2-Bromo-4-hydroxy-4-methylcyclohexa-2,5-dienone (1n).** Using a modification of general method A, in which 10:1 acetone– $\text{H}_2\text{O}$  was used as solvent, 2-bromo-4-methylphenol gave **1n** as a yellow/orange solid in 76% yield after flash-column chromatography (3:1 hexanes–EtOAc). IR (thin film) 3474, 3045, 2980, 2937, 1660, 1594, 1052  $\text{cm}^{-1}$ ;  $^1\text{H}$  NMR (300 MHz,  $\text{CDCl}_3$ )  $\delta$  7.34 (d,  $J = 2.8$  Hz, 1 H), 6.92 (dd,  $J = 10.0, 2.8$  Hz, 1 H), 6.15 (d,  $J = 10.0$  Hz, 1 H), 3.23 (s, 2 H), 1.50 (s, 3 H), 1.43 (s, 9 H), 0.14 (s, 9 H);  $^{13}\text{C}$  NMR (75 MHz,  $\text{CDCl}_3$ , DEPT)  $\delta$  187.8 (C), 165.4 (C), 165.3 (C), 155.6 (CH), 147.6 (CH), 140.4 (C), 129.0 (CH), 82.3 (C), 75.2 (C), 43.3 ( $\text{CH}_2$ ), 28.0 ( $\text{CH}_3 \times 3$ ), 26.4 ( $\text{CH}_3$ ), -1.5 ( $\text{CH}_3 \times 3$ ); HRMS (ESI+) 361.1442 calcd for  $\text{C}_{17}\text{H}_{26}\text{O}_5\text{SiNa}$ , found 361.1443.

1 H), 6.27 (d, 10.0 Hz, 1 H), 2.04 (bs, 1 H), 1.53 (s, 3 H);  $^{13}\text{C}$  NMR (75 MHz,  $\text{CDCl}_3$ , DEPT)  $\delta$  178.6 (C), 152.9 (CH), 152.7 (CH), 125.6 (CH), 123.4 (C), 70.1 (C), 26.5 ( $\text{CH}_3$ ); HRMS (ESI+) 224.9522 calcd for  $\text{C}_7\text{H}_7\text{BrO}_2\text{Na}$ , found 224.9531.

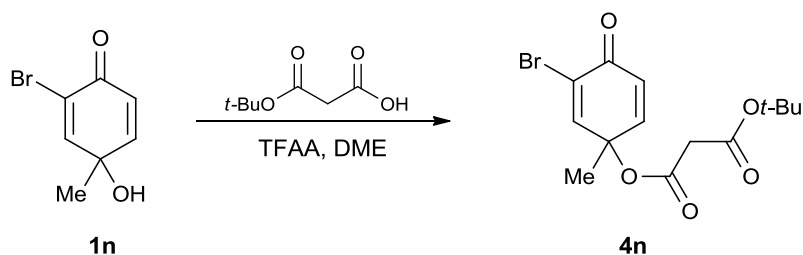

**3-Bromo-1-methyl-4-oxocyclohexa-2,5-dien-1-yl *tert*-butyl malonate (4n).** Using a modification of general method B, in which the concentration was 0.2 M in quinol, **1n** gave **4n** as a yellow oil in 69% yield after flash-column chromatography (3:1 hexanes–EtOAc). IR (neat) 3050, 2981, 2934, 1759, 1728, 1672, 1640, 1606, 1334, 1146, 1056, 965, 824  $\text{cm}^{-1}$ ;  $^1\text{H}$  NMR (500 MHz,  $\text{CDCl}_3$ )  $\delta$  7.36 (d,  $J = 2.9$  Hz, 1 H), 6.94 (dd,  $J = 10.0$ , 2.9 Hz, 1 H), 6.37 (d,  $J = 10.0$  Hz, 1 H), 3.30 (s, 2 H), 1.62 (s, 3 H), 1.49 (s, 9 H);  $^{13}\text{C}$  NMR (MHz,  $\text{CDCl}_3$ , DEPT)  $\delta$  177.9 (C), 165.3 (C), 165.2 (C), 148.79 (CH), 148.72 (CH), 126.7 (CH), 124.6 (C), 82.7 (C), 76.7 (C), 43.0 ( $\text{CH}_2$ ), 28.0 ( $\text{CH}_3 \times 3$ ), 25.9 ( $\text{CH}_3$ ); HRMS (ESI+) 367.0152 calcd for  $\text{C}_{14}\text{H}_{17}\text{BrO}_5\text{Na}$ , found 367.0143.

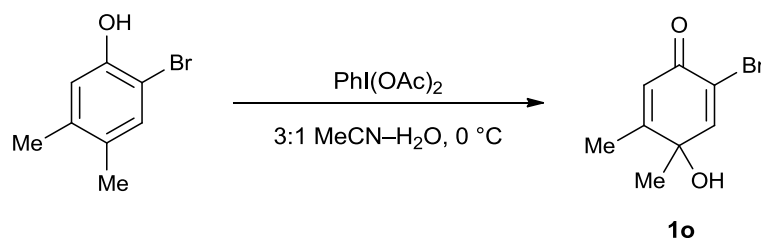

**2-Bromo-4-hydroxy-4,5-dimethylcyclohexa-2,5-dienone (1o).** Using general method A, 2-bromo-4,5-dimethylphenol<sup>20</sup> was converted into quinol **1o** in 74% yield after flash-column chromatography (3:1 hexanes–EtOAc). IR (thin film) 3457, 3038, 2986, 2934, 1648, 1626, 1596, 1363, 1231, 1132, 1041,  $\text{cm}^{-1}$ ;  $^1\text{H}$  NMR

<sup>20</sup> S. Kajigaeshi, T. Kakinami, T. Okamoto, H. Nakamura, M. Fujikawa, and T. Ube, *Bull Chem. Soc. Jpn.* 1987, **60**, 4187.

(300 MHz, CDCl<sub>3</sub>)  $\delta$  7.29 (s, 1 H), 5.95 (q,  $J$  = 1.4 Hz, 1 H), 3.64 (s, 1 H), 2.05 (d,  $J$  = 1.4 Hz, 3 H), 1.41 (s, 3 H); <sup>13</sup>C NMR (75 MHz, CDCl<sub>3</sub>, DEPT)  $\delta$  179.3 (C), 164.1 (C), 154.1 (CH), 123.8 (CH), 122.6 (C), 71.7 (C), 25.9 (CH<sub>3</sub>), 18.2 (CH<sub>3</sub>); **HRMS** (ESI+) 238.9678 calcd for C<sub>8</sub>H<sub>9</sub>OBr<sub>2</sub>Na, found 238.9736.

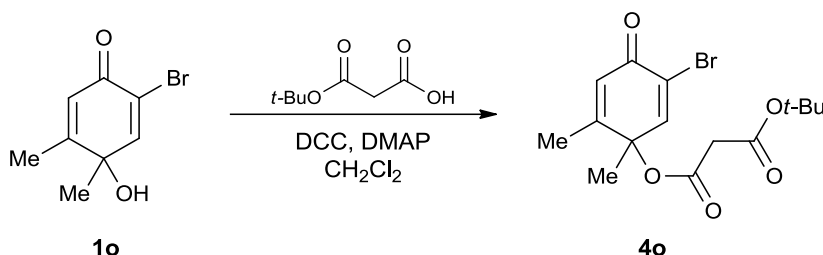

**5-Bromo-1,2-dimethyl-4-oxocyclohexa-2,5-dien-1-yl tert-butyl malonate (4o).** Using general method C, mono-*tert*-butyl malonate was coupled to quinol **1o** to give **4o** in 96% yield after flash-column chromatography (5:1 hexanes–EtOAc). **IR** (thin film) 2979, 2933, 2859, 1729, 1666, 1332, 1222, 1145 1030 cm<sup>-1</sup>; **<sup>1</sup>H NMR** (300 MHz, CDCl<sub>3</sub>)  $\delta$  7.27 (s, 1 H), 6.20 (q,  $J$  = 1.3 Hz, 1 H), 3.30 (s, 2 H), 1.99 (d,  $J$  = 1.3 Hz, 3 H), 1.55 (s, 3 H) 1.47 (s, 9 H); <sup>13</sup>C NMR (75 MHz, CDCl<sub>3</sub>, DEPT)  $\delta$  177.9 (C), 165.0 (C), 164.8 (C), 159.3 (C), 149.2 (CH), 124.8 (CH), 124.0 (C), 82.4 (C), 78.4 (C), 42.6 (CH<sub>2</sub>), 27.8 (CH<sub>3</sub> × 3), 25.7 (CH<sub>3</sub>), 17.5 (CH<sub>3</sub>); **HRMS** (ESI+) 381.0308 calcd for C<sub>15</sub>H<sub>19</sub>O<sub>5</sub>BrNa, found 381.0337.

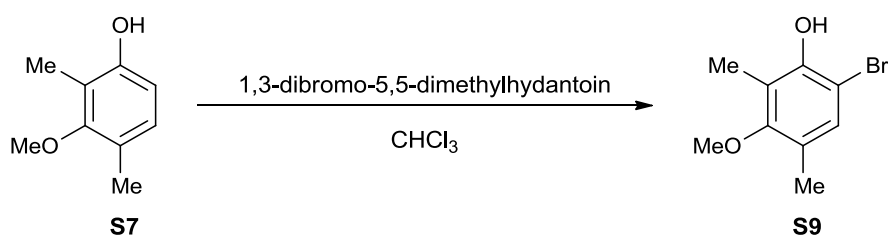

**6-Bromo-3-methoxy-2,4-dimethylphenol (S9).** Phenol **S7** (500 mg, 3.29 mmol) was dissolved in chloroform (30 mL). To this, 1,3-dibromo-5,5-dimethylhydantoin (70 mg, 2.5 mmol) was added portion-wise. The reaction mixture was protected from light and stirred overnight before being quenched with 10% aq. Na<sub>2</sub>S<sub>2</sub>O<sub>3</sub> and extracted with CH<sub>2</sub>Cl<sub>2</sub>. The combined organic layers were washed with brine, dried over MgSO<sub>4</sub>, filtered, and concentrated. The resulting brown solid was purified by flash-column chromatography (9:1 hexanes–EtOAc) to

afford **S9** as a yellow solid (39 mg, 51% yield), which quickly turned brown upon standing (product is suspected to be light sensitive).; **IR** (neat) 3511, 2939, 1596, 1470, 1405, 1308, 1235, 1209, 1085, 1003, 778  $\text{cm}^{-1}$ ;  **$^1\text{H}$  NMR** (300 MHz,  $\text{CDCl}_3$ )  $\delta$  7.12 (s, 1 H), 5.42 (s, 1 H), 3.69 (s, 3 H), 2.23 (s, 3 H), 2.20 (s, 3 H);  **$^{13}\text{C}$  NMR** (75 MHz,  $\text{CDCl}_3$ , DEPT)  $\delta$  157.3 (C), 149.3 (C), 129.8 (CH), 124.3 (C), 119.2 (C), 104.7 (C), 60.1 (CH<sub>3</sub>), 15.6 (CH<sub>3</sub>), 10.1 (CH<sub>3</sub>); **HRMS** (ESI+) 229.9937 calcd for  $\text{C}_9\text{H}_{11}\text{BrO}_2$ , found 229.0151.

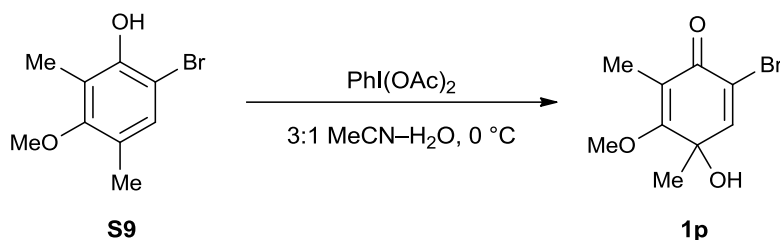

**6-Bromo-4-hydroxy-3-methoxy-2,4-dimethylcyclohexa-2,5-dienone (1p).** Using general method A, phenol **S9** was converted into quinol **1p** in 51% after flash-column chromatography (1:0→1:1 hexanes–EtOAc). **IR** (neat) 3397, 2928, 2853, 1640, 1601, 1370, 1299, 1208, 1150, 1062, 868, 762  $\text{cm}^{-1}$ ;  **$^1\text{H}$  NMR** (300 MHz,  $\text{CDCl}_3$ )  $\delta$  7.08 (s, 1 H), 4.05 (s, 3 H), 1.85 (s, 3 H), 1.51 (s, 3 H);  **$^{13}\text{C}$  NMR** (75 MHz,  $\text{CDCl}_3$ , DEPT)  $\delta$  181.6 (C), 171.7 (C), 148.7 (CH), 122.7 (C), 116.8 (C), 71.6 (C), 61.6 (CH<sub>3</sub>), 25.8 (CH<sub>3</sub> × 3), 9.9 (CH<sub>3</sub>); **HRMS** (ESI+) 268.9784 calcd for  $\text{C}_9\text{H}_{11}\text{BrO}_3\text{Na}$ , found 268.9781.

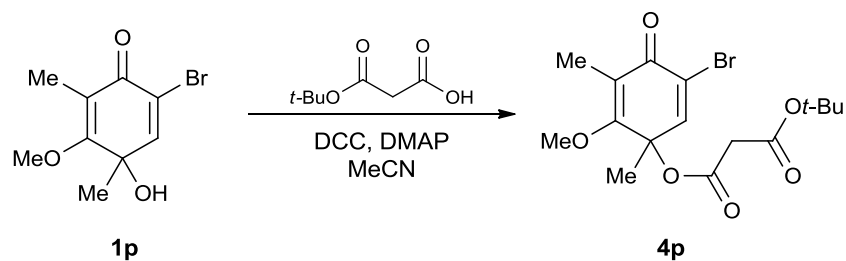

**5-Bromo-2-methoxy-1,3-dimethyl-4-oxocyclohexa-2,5-dien-1-yl-tert-butyl malonate (4p).** Using a modification of general method C, in which MeCN was used as solvent, mono-*tert*-butyl malonate was coupled to quinol **1p** to give **4p** in 55% yield and 19% of recovered **1p** after flash-column chromatography (9:1

hexanes–EtOAc). **IR** (neat) 2979, 2933, 2853, 1754, 1730, 1657, 1651, 1613, 1309, 1214, 1143, 1054  $\text{cm}^{-1}$ ;  **$^1\text{H}$  NMR** (300 MHz,  $\text{CDCl}_3$ )  $\delta$  7.04 (s, 1 H), 3.90 (s, 3 H), 3.28 (s, 2 H), 1.95 (s, 3 H), 1.56 (s, 3 H), 1.46 (s, 9 H);  **$^{13}\text{C}$  NMR** (75 MHz,  $\text{CDCl}_3$ , DEPT)  $\delta$  180.5 (C), 170.2 (C), 165.3 (C), 165.1 (C), 144.1 (CH), 124.7 (C), 117.0 (C), 82.5 (C), 77.6 (C), 61.7 ( $\text{CH}_3$ ), 42.9 ( $\text{CH}_2$ ), 28.0 ( $\text{CH}_3 \times 3$ ), 25.1 ( $\text{CH}_3$ ), 10.6 ( $\text{CH}_3$ ); **HRMS** (ESI+) 441.0414 calcd for  $\text{C}_{16}\text{H}_{21}\text{BrO}_6\text{Na}$ , found 411.0432.

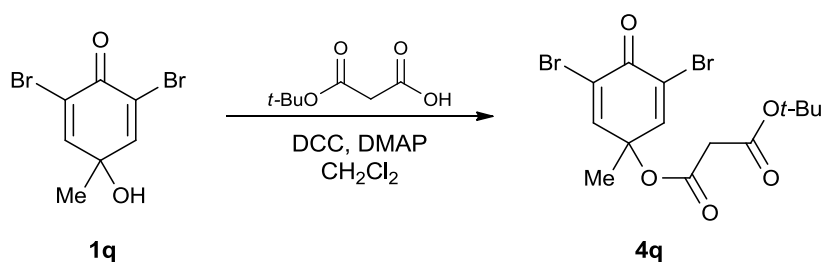

**tert-Butyl (3,5-dibromo-1-methyl-4-oxocyclohexa-2,5-dien-1-yl) malonate (4q).** Using general method C, mono-*tert*-butyl malonate was coupled to quinol **1q**<sup>21</sup> to give **4q** in quantitative yield after flash-column chromatography (5:1 hexanes–EtOAc). **IR** (thin film) 3051, 2977, 2927, 1729, 1681, 1600, 1310, 1142, 1052, 698  $\text{cm}^{-1}$ ;  **$^1\text{H}$  NMR** (300 MHz,  $\text{CDCl}_3$ )  $\delta$  7.35 (s, 2 H), 3.30 (s, 2 H), 1.63 (s, 3 H), 1.48 (s, 9 H);  **$^{13}\text{C}$  NMR** (75 MHz,  $\text{CDCl}_3$ , DEPT)  $\delta$  165.3 ( $\text{C} \times 2$ ), 165.1 (C), 148.9 ( $\text{CH} \times 2$ ), 82.9 (C), 77.7(C), 42.9 ( $\text{CH}_2$ ), 28.1 ( $\text{CH}_3 \times 3$ ), 25.7 ( $\text{CH}_3$ ); **HRMS** (ESI+) 444.9257 calcd for  $\text{C}_{14}\text{H}_{16}\text{Br}_2\text{O}_5\text{Na}$ , found 444.9250.

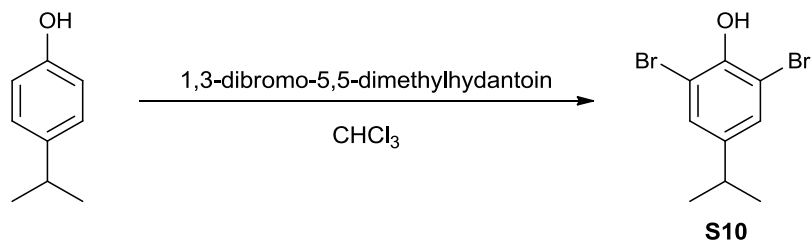

**2,6-dibromo-4-isopropyl phenol (S10).** A solution of 4-isopropyl phenol (266 mg, 1.95 mmol) in 15 mL of dry  $\text{CH}_2\text{Cl}_2$  was treated with 1,3-dibromo-5,5-dimethylhydantoin (614.3 mg, 2.14 mmol) in small portions. The

<sup>21</sup> Prepared according to: A. McKillop, L. McLaren, and R. J. K. Taylor, *J. Chem. Soc., Perkin Trans. I* 1994, 2047.

mixture was then protected from light and stirred. After 16 h, the mixture was diluted with CH<sub>2</sub>Cl<sub>2</sub> and washed with 10% HCl solution, dried over Na<sub>2</sub>SO<sub>4</sub>, filtered and concentrated. Crude product was purified by flash-column chromatography (39:1 hexanes-EtOAc) to give 285.8 mg of **S10** in 49% yield. Identity was verified by comparison of <sup>1</sup>H NMR spectrum with literature data.<sup>22</sup>

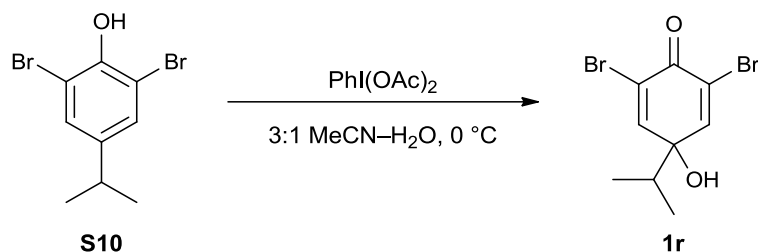

**2,6-Dibromo-4-hydroxy-4-isopropylcyclohexa-2,5-dienone (1r).** Using general method A, **S10** was converted into quinol **1r** in 78% yield after flash-column chromatography (5:1 hexanes–EtOAc). **IR** (thin film) 3434, 1671, 1596, 1461, 1358, 997, 692 cm<sup>-1</sup>; **<sup>1</sup>H NMR** (300 MHz, CDCl<sub>3</sub>) δ 7.29 (s, 2 H), 2.29 (bs, 1 H), 2.06 (hept, *J* = 6.9 Hz, 1 H), 1.01 (d, *J* = 6.9 Hz, 6 H); **<sup>13</sup>C NMR** (75 MHz, CDCl<sub>3</sub>, DEPT) δ 172.5 (C), 151.0 (CH × 2), 122.2 (C × 2), 77.3 (C), 37.3 (CH), 17.1 (CH<sub>3</sub> × 2); **HRMS** (ESI+) 330.8940 calcd for C<sub>9</sub>H<sub>10</sub>Br<sub>2</sub>O<sub>2</sub>Na, found 330.8940.

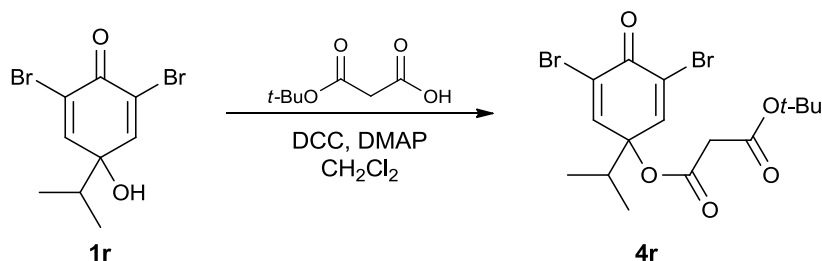

**tert-Butyl (3,5-dibromo-1-isopropyl-4-oxocyclohexa-2,5-dien-1-yl) malonate (4r).** Using general method C, mono-*tert*-butyl malonate was coupled to quinol **1r** to give **4r** in 95% yield after flash-column

<sup>22</sup> (a) A. O. Fitton, A. Rigby, and R. J. Hurlock, *J. Chem. Soc. C* 1968, 1000. (b) J. Eriksson, S. Rahm, N. Green, Å. Bergman, E. Jakobsson, *Chemosphere* 2004, **54**, 117.

chromatography (9:1 hexanes–EtOAc). **IR** (thin film) 2976, 2934, 1730, 1682, 1599, 1463, 1329, 1255, 1147, 1002, 842  $\text{cm}^{-1}$ ;  **$^1\text{H}$  NMR** (300 MHz,  $\text{CDCl}_3$ )  $\delta$  7.29 (s, 2 H), 3.35 (s, 2 H), 2.22 (hept,  $J = 6.9$  Hz 1 H), 1.49 (s, 9 H), 1.01 (d,  $J = 6.9$  Hz, 6 H);  **$^{13}\text{C}$  NMR** (75 MHz,  $\text{CDCl}_3$ , DEPT)  $\delta$  172.2 (C), 165.1 (C), 165.0 (C), 147.6 (CH  $\times$  2), 122.6 (C), 82.8 (C), 82.6 (C), 42.8 ( $\text{CH}_2$ ), 36.9 (CH), 27.9 ( $\text{CH}_3 \times 3$ ), 16.9 ( $\text{CH}_3 \times 2$ ); **HRMS** (ESI+) 474.9550 calcd for  $\text{C}_{16}\text{H}_{20}^{81}\text{Br}_2\text{O}_5$ , found 474.9569.

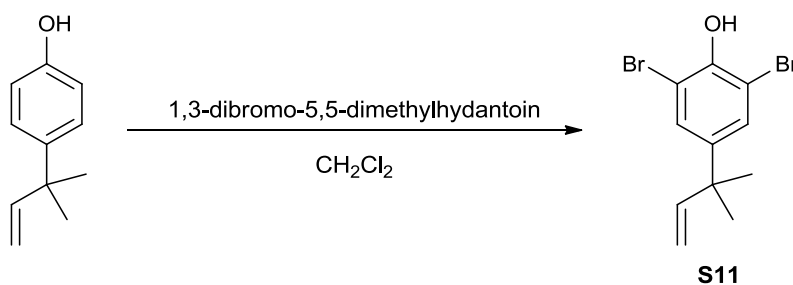

**2,6-Dibromo-4-(2-methylpent-4-en-2-yl)phenol (S11).** A solution of 4-(2-methylpent-4-en-2-yl)phenol<sup>14</sup> (159.9 mg, 0.90 mmol) in 12 mL of  $\text{CH}_2\text{Cl}_2$  was treated with 1,3-dibromo-5,5-dimethylhydantoin (259.3 mg, 0.9 mmol). The reaction flask was protected from light and stirred for 16 h. The mixture was then diluted with  $\text{CH}_2\text{Cl}_2$ , washed with 10% aq. HCl and brine, dried over  $\text{Na}_2\text{SO}_4$ , filtered, and concentrated. Flash-column chromatography (20:1 hexanes– $\text{Et}_2\text{O}$ ) provided **S11** (243 mg, 80% yield). **IR** (thin film) 3498, 2964, 1555, 1475, 1393, 1285, 1163, 998, 917, 733  $\text{cm}^{-1}$ ;  **$^1\text{H}$  NMR** (300 MHz,  $\text{CDCl}_3$ )  $\delta$  7.38 (s, 2 H), 5.74 (s, 1 H), 5.61–5.42 (m, 1 H), 4.99 (s, 1 H), 4.97–4.90 (m, 1 H), 2.28 (d,  $J = 7.3$  Hz, 2 H), 1.24 (s, 6 H);  **$^{13}\text{C}$  NMR** (75 MHz,  $\text{CDCl}_3$ , DEPT)  $\delta$  147.2 (C), 144.2 (C), 134.6 (CH), 129.8 (CH  $\times$  2), 117.8 ( $\text{CH}_2$ ), 48.7 ( $\text{CH}_2$ ), 37.4 (C), 28.5 ( $\text{CH}_3 \times 2$ ); **HRMS** (ESI–) 333.9386 calcd for  $\text{C}_{12}\text{H}_{14}\text{Br}_2\text{O}$ , found 333.1305.



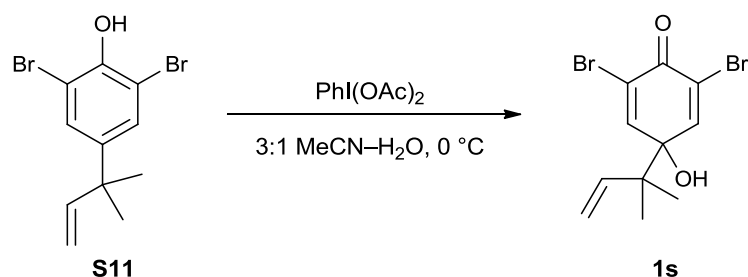

**2,6-Dibromo-4-hydroxy-4-(2-methylpent-4-en-2-yl)cyclohexa-2,5-dienone (1s).** Using general method A, phenol **S11** was converted into quinol **1s** in 74% yield after flash-column chromatography (5:1 hexanes–EtOAc). **IR** (thin film) 3470, 2970, 1677, 1592, 1467, 1312, 988, 918  $\text{cm}^{-1}$ ;  **$^1\text{H}$  NMR** (300 MHz,  $\text{CDCl}_3$ )  $\delta$  7.48 (s, 2 H), 5.79 (ddt,  $J = 17.5, 10.1, 7.4$  Hz, 1 H), 5.11 (d,  $J = 10.1$  Hz, 1 H), 5.07 (d,  $J = 17.5$  Hz, 1 H), 3.08 (s, 2 H), 2.17 (d,  $J = 7.4$  Hz, 2 H), 1.04 (s, 6 H);  **$^{13}\text{C}$  NMR** (75 MHz,  $\text{CDCl}_3$ , DEPT)  $\delta$  172.5 (C), 151.5 ( $\text{CH} \times 2$ ), 134.0 (CH), 121.8 ( $\text{C} \times 2$ ), 118.7 ( $\text{CH}_2$ ), 79.0 (C), 43.0 (C), 42.0 ( $\text{CH}_2$ ), 22.2 ( $\text{CH}_3 \times 2$ ); **HRMS** (ESI+) 370.9253 calcd for  $\text{C}_{12}\text{H}_{14}\text{Br}_2\text{O}_2\text{Na}$ , found 370.9264.

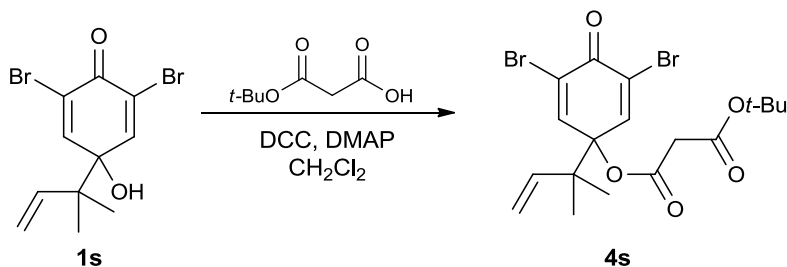

**tert-Butyl (3,5-dibromo-1-(2-methylpent-4-en-2-yl)-4-oxocyclohexa-2,5-dien-1-yl) malonate (4s).** Using general method C, mono-*tert*-butyl malonate was coupled to quinol **1s** to give **4s** in 81% yield after flash-column chromatography (19:1 hexanes–EtOAc). **IR** (thin film) 2974, 1730, 1682, 1595, 1466, 1313, 1254, 1145, 991, 697  $\text{cm}^{-1}$ ;  **$^1\text{H}$  NMR** (300 MHz,  $\text{CDCl}_3$ )  $\delta$  7.36 (s, 2 H), 5.75 (ddt,  $J = 17.3, 10.1, 7.4$  Hz, 1 H), 5.12 (d,  $J = 10.1$  Hz, 1 H), 5.06 (d,  $J = 17.3$  Hz, 1 H), 3.35 (s, 2 H), 2.17 (d,  $J = 7.4$  Hz, 2 H), 1.50 (s, 9 H), 1.03 (s, 6 H);  **$^{13}\text{C}$  NMR** (75 MHz,  $\text{CDCl}_3$ , DEPT)  $\delta$  172.1 (C), 165.1 (C), 165.0 (C), 147.8 ( $\text{CH} \times 2$ ), 133.2 (CH), 122.7 (C), 119.2 ( $\text{CH}_2$ ), 84.7 (C), 82.9 (C), 44.3 (C), 42.9 ( $\text{CH}_2$ ), 41.8 ( $\text{CH}_2$ ), 28.1 ( $\text{CH}_3 \times 3$ ), 22.3 ( $\text{CH}_3 \times 2$ ); **HRMS** (ESI+) 514.9864 calcd for  $\text{C}_{19}\text{H}_{24}\text{Br}_2\text{O}_5\text{Na}$ , found 514.9882.

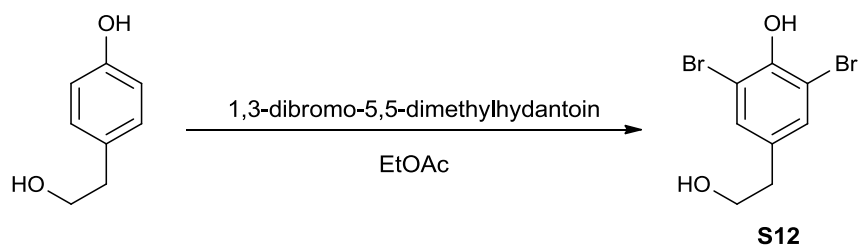

**2,6-Dibromo-4-(2-hydroxyethyl)phenol (S12).** To a solution of 2-(4-hydroxyphenyl)ethanol<sup>23</sup> (150 mg, 1.09 mmol) in EtOAc (11 mL) was added 1,3-dibromo-5,5-dimethylhydantoin (312 mg, 1.09 mmol). The solution was protected from light and stirred for 15 h. The reaction was then diluted with EtOAc and quenched with 10% aq. HCl. The organic layer was washed with H<sub>2</sub>O and brine, dried over Na<sub>2</sub>SO<sub>4</sub>, filtered, and concentrated. The crude material was purified by flash-column chromatography (2:1 hexanes/EtOAc) to give **S12** as a yellow solid (190 mg, 59% yield). **IR** (thin film) 3389, 2975, 2952, 2891, 1557, 1475, 1408, 1238, 1012, 997, 736 cm<sup>-1</sup>; **<sup>1</sup>H NMR** (300 MHz, CDCl<sub>3</sub>) δ 7.33 (s, 2 H), 5.80 (bs, 1 H), 3.83 (t, *J* = 6.4 Hz, 2 H), 2.76 (t, *J* = 6.4 Hz, 2 H), 1.47 (s, 1 H); **<sup>13</sup>C NMR** (75 MHz, CDCl<sub>3</sub>, DEPT) δ 148.1 (C), 133.5 (C), 132.6 (CH × 2), 109.9 (C × 2), 63.4 (CH<sub>2</sub>), 37.7 (CH<sub>2</sub>); **HRMS** (ESI<sup>-</sup>) 292.8818 calcd for C<sub>8</sub>H<sub>7</sub>Br<sub>2</sub>O<sub>2</sub>, found 292.8810.

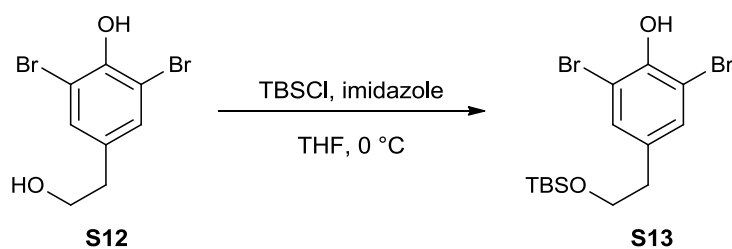

**2,6-Dibromo-4-(2-((*tert*-butyldimethylsilyl)oxy)ethyl)phenol (S13).** Imidazole (48 mg, 0.71 mmol) was added to a solution of alcohol **S12** (175 mg, 0.591 mmol) in THF (6 mL). The solution was cooled to 0 °C and TBSCl (107 mg, 0.710 mmol) was added. The mixture was stirred for 7 h, then quenched with saturated aq. NaHCO<sub>3</sub> (10 mL). The mixture was diluted with Et<sub>2</sub>O and the organic layer was washed with H<sub>2</sub>O and brine, dried over MgSO<sub>4</sub>, and concentrated. The crude material, a mixture of alkyl and aryl silyl ethers, was purified

<sup>23</sup> Although this substrate is commercially available, we chose to prepare it by LAH reduction of the less expensive methyl 4-hydroxyphenylacetate.

by flash-column chromatography (5:1 toluene–petroleum ether) to give **S13** as a yellow oil (65 mg, 27% yield). **IR** (thin film) 3512, 2955, 2928, 2858, 1563, 1472, 1256, 1163, 1100, 836, 778, 738  $\text{cm}^{-1}$ ;  **$^1\text{H}$  NMR** (300 MHz,  $\text{CDCl}_3$ )  $\delta$  7.31 (s, 2 H), 5.77 (s, 1 H), 3.74 (t,  $J = 6.4$  Hz, 2 H), 2.69 (t,  $J = 6.4$  Hz, 2 H), 0.87 (s, 9 H),  $-0.03$  (s, 6 H);  **$^{13}\text{C}$  NMR** (75 MHz,  $\text{CDCl}_3$ , DEPT)  $\delta$  147.7 (C), 134.4 (C), 132.8 ( $\text{CH} \times 2$ ), 109.5 ( $\text{C} \times 2$ ), 63.9 ( $\text{CH}_2$ ), 38.0 ( $\text{CH}_2$ ), 26.0 ( $\text{CH}_3 \times 3$ ), 18.4 (C),  $-5.3$  ( $\text{CH}_3 \times 2$ ); **HRMS** (ESI $^-$ ) 406.9683 calcd for  $\text{C}_{14}\text{H}_{21}\text{Br}_2\text{O}_2\text{Si}$ , found 406.9683.

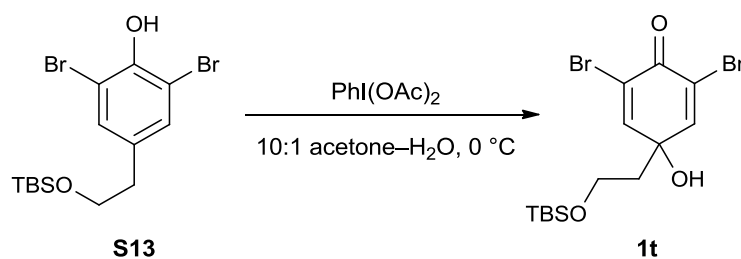

**2,6-Dibromo-4-(2-((tert-butyldimethylsilyl)oxy)ethyl)-4-hydroxycyclohexa-2,5-dienone (1t).** Using a modification of general method A, in which 10:1 acetone– $\text{H}_2\text{O}$  was used as solvent, **S13** gave **1t** as a yellow solid in 42% yield after flash-column chromatography (5:1 hexanes/ $\text{EtOAc}$ ). **IR** (thin film) 3466, 3036, 2926, 2856, 1668, 1592, 1471, 1349, 1093, 992, 840, 770, 701  $\text{cm}^{-1}$ ;  **$^1\text{H}$  NMR** (300 MHz,  $\text{CDCl}_3$ )  $\delta$  7.42 (s, 2 H), 4.51 (s, 1 H), 3.96 (t,  $J = 5.4$  Hz, 2 H), 1.99 (t,  $J = 5.4$  Hz, 2 H), 0.91 (s, 9 H), 0.11 (s, 6 H);  **$^{13}\text{C}$  NMR** (75 MHz,  $\text{CDCl}_3$ )  $\delta$  172.4 (C), 151.7 ( $\text{CH} \times 2$ ), 121.0 ( $\text{C} \times 2$ ), 74.3 (C), 60.4 ( $\text{CH}_2$ ), 41.0 ( $\text{CH}_2$ ), 25.9 ( $\text{CH}_3 \times 3$ ), 18.1 (C), 5.5 ( $\text{CH}_3 \times 2$ ); **HRMS** (ESI $^+$ ) 446.9608 calcd for  $\text{C}_{17}\text{H}_{22}\text{Br}_2\text{O}_3\text{SiNa}$ , found 446.9600.

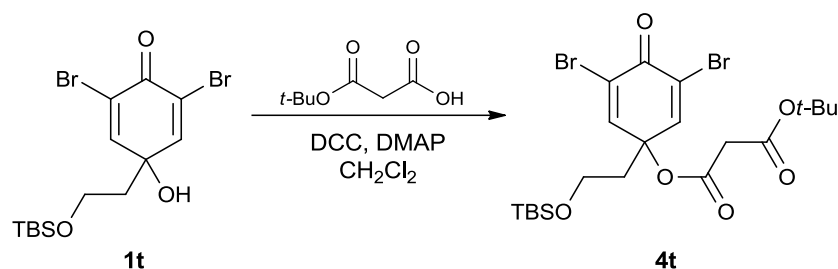

***tert*-Butyl (3,5-dibromo-1-(2-((*tert*-butyldimethylsilyl)oxy)ethyl)-4-oxocyclohexa-2,5-dien-1-yl) malonate (4t).** Using general method C, mono-*tert*-butyl malonate was coupled to quinol **1t** to give **4t** as a colorless oil in 96% yield after flash-column chromatography (10:1 hexanes/EtOAc). **IR** (thin film) 2953, 2929, 2856, 1757, 1732, 1682, 1599, 1369, 1257, 1142, 1099, 838, 779  $\text{cm}^{-1}$ ;  **$^1\text{H}$  NMR** (300 MHz,  $\text{CDCl}_3$ )  $\delta$  7.43 (s, 2 H), 3.79 (t, 5.5 Hz, 2 H), 3.30 (s, 2 H), 2.08 (t, 5.5 Hz, 2 H), 1.48 (s, 9 H), 0.88 (s, 9 H), 0.05 (s, 6 H);  **$^{13}\text{C}$  NMR** (75 MHz,  $\text{CDCl}_3$ , DEPT)  $\delta$  172.5 (C), 165.0 (C  $\times$  2, overlapped), 148.7 (CH  $\times$  2), 121.9 (C  $\times$  2), 82.9 (C), 79.5 (C), 57.5 ( $\text{CH}_2$ ), 43.0 ( $\text{CH}_2$ ), 42.7 ( $\text{CH}_2$ ), 28.1 ( $\text{CH}_3 \times 3$ ), 26.0 ( $\text{CH}_3 \times 3$ ), -5.3 ( $\text{CH}_3 \times 2$ ); **HRMS** (ESI+) 589.0227 calcd for  $\text{C}_{21}\text{H}_{32}\text{Br}_2\text{O}_6\text{SiNa}$ , found 589.0229.

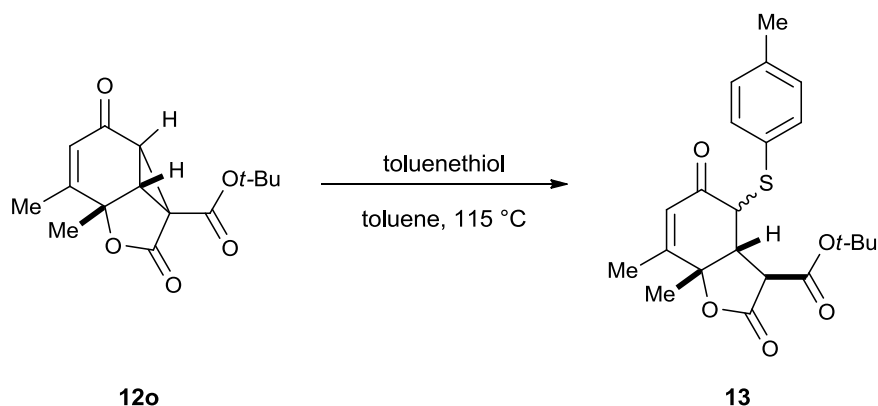

**(3*S*,3*aR*,7*aS*)-*tert*-Butyl 7,7a-dimethyl-2,5-dioxo-4-(*p*-tolylthio)-2,3,3a,4,5,7a-hexahydrobenzofuran-3-carboxylate (13).** A mixture of crude cyclopropane **12o** (68 mg, 0.24 mmol) and *p*-toluenethiol (30.3 mg, 0.24 mmol) was dissolved in 5 mL toluene. A condenser was attached to the flask and the reaction was heated to 115 °C for 1 h. The mixture was allowed to cool to r.t. The solvent was removed in vacuo and the residue purified by flash-column chromatography to give **13** (36.7 mg, 37.2% yield from **4o**), as a 2:1 inseparable

mixture of diastereomers. **IR** (thin film) 2979, 2928, 1787, 1731, 1675, 1370, 1293, 1257, 1153, 1090, 952  $\text{cm}^{-1}$ ;  **$^1\text{H}$  NMR** (300 MHz,  $\text{CDCl}_3$ , \*denotes minor diastereomer)  $\delta$  \*7.39 (d,  $J$  = 8.2 Hz), 7.34 (d,  $J$  = 8.2 Hz, 2 H), 7.16 (d,  $J$  = 7.9 Hz, 2 H), \*7.15 (d,  $J$  = 8.4 Hz), \*6.02 (q,  $J$  = 1.4 Hz), 5.94 (dq,  $J$  = 1.3, 1.3 Hz, 1 H), \*4.16 (d,  $J$  = 5.0 Hz), 3.74 (dd,  $J$  = 1.9, 1.2 Hz, 1 H), \*3.66 (dd,  $J$  = 11.9, 5.0 Hz), 3.48 (dd,  $J$  = 12.5, 2.0 Hz, 1 H), \*3.37 (d,  $J$  = 11.9 Hz), 3.32 (d,  $J$  = 12.5, Hz, 1 H), 2.34 (s, 3 H) \*2.34 (s), 2.06 (d,  $J$  = 1.4 Hz, 3 H), \*2.01 (d,  $J$  = 1.3 Hz), 1.90 (s, 3 H), \*1.66 (s), \*1.53 (s), 1.46 (s, 9 H);  **$^{13}\text{C}$  NMR** (75 MHz,  $\text{CDCl}_3$ , mixture of diastereomers)  $\delta$  191.2 (C), 190.5 (C), 169.7 (C), 168.5 (C), 166.3 (C), 164.9 (C), 157.1 (C), 156.0 (C), 139.5 (C), 138.5 (C), 133.9 (CH), 132.8 (CH), 130.3 (CH), 130.2 (CH), 129.6 (C), 128.6 (C), 127.0 (CH), 126.0 (CH), 84.0 (C), 83.4 (C), 83.3 (C), 81.9 (C), 56.3 (CH), 52.7 (CH), 51.9 (CH), 51.7 (CH), 51.3 (CH), 50.0 (CH), 28.04 ( $\text{CH}_3$ ), 28.02 ( $\text{CH}_3$ ), 25.5 ( $\text{CH}_3$ ), 22.5 ( $\text{CH}_3$ ), 21.4 ( $\text{CH}_3$ ), 21.3 ( $\text{CH}_3$ ), 18.6 ( $\text{CH}_3$ ), 18.3 ( $\text{CH}_3$ ); **HRMS** (ESI+) 425.1393 calcd for  $\text{C}_{22}\text{H}_{26}\text{O}_5\text{SNa}$ , found 425.1403.

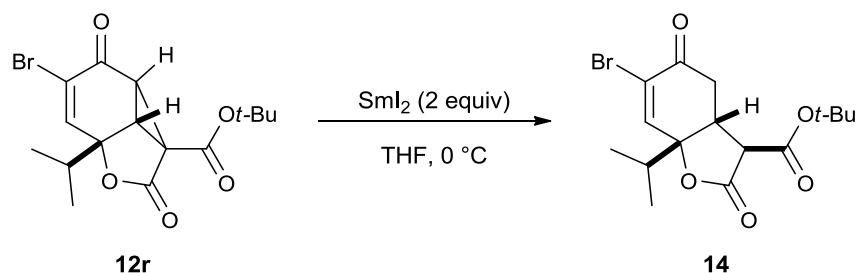

**(3S,3aR,7aS)-tert-Butyl 6-bromo- 7a-isopropyl- 2,5-dioxo- 2,3,3a,4,5,7a-hexahydrobenzofuran-3-carboxylate (14).** A solution of  $\text{SmI}_2$  in THF (4.5 mL, ~0.16 mmol) was added slowly to cyclopropane **12r** (22 mg, 0.059 mmol) at 0  $^\circ\text{C}$ . The reaction mixture was stirred for ~5 min before quenching with 0.5 mL of 10% aq. HCl. The cooling bath was removed and the mixture was extracted with  $\text{CH}_2\text{Cl}_2$ . The organic layer was dried over  $\text{Na}_2\text{SO}_4$ , filtered, and concentrated. The crude material was purified by flash-column chromatography (5:1 hexanes–EtOAc) to give **14** (8.7 mg, 39% yield). **IR** (thin film) 2978, 2927, 1785, 1716, 1699, 1371, 1152, 994, 948  $\text{cm}^{-1}$ ;  **$^1\text{H}$  NMR** (300 MHz,  $\text{CDCl}_3$ )  $\delta$  7.17 (d,  $J$  = 1.7 Hz, 1 H), 3.47 (dtd,  $J$  = 11.9, 3.8, 1.7 Hz, 1 H), 3.35 (d,  $J$  = 12.0 Hz, 1 H), 2.84 (d,  $J$  = 3.8 Hz, 2 H), 2.27 (hept,  $J$  = 6.9 Hz, 1 H), 1.50 (s, 9 H), 1.14 (d,  $J$  =

6.9 Hz, 6 H); **<sup>13</sup>C NMR** (75 MHz, CDCl<sub>3</sub>, DEPT) δ 187.3 (C), 168.8 (C), 165.2 (C), 146.4 (CH), 126.5 (C), 86.5 (C), 84.2 (C), 53.3 (CH), 40.0 (CH), 37.4 (CH<sub>2</sub>), 36.1 (CH), 28.1 (CH<sub>3</sub> × 3), 17.7 (CH<sub>3</sub>), 16.9 (CH<sub>3</sub>); **HRMS** (ESI+) 395.0465 calcd for C<sub>16</sub>H<sub>21</sub>BrO<sub>5</sub>Na, found 395.0445.

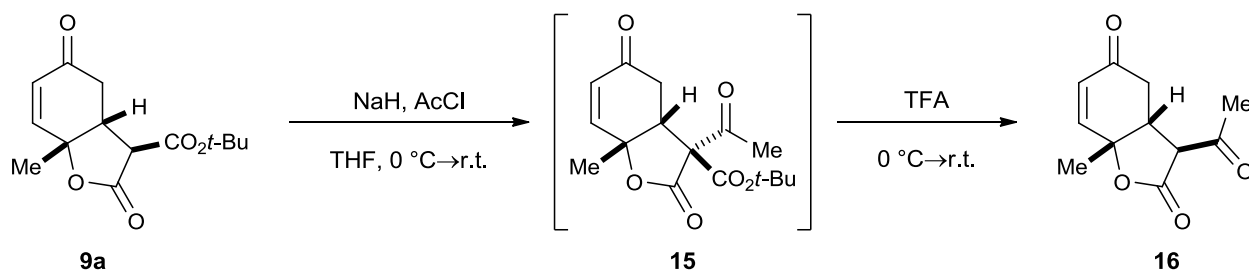

**3-Acetyl-7a-methyl-3a,4-dihydrobenzofuran-2,5(3*H*,7*aH*)-dione (16).** Compound **9a** (20 mg, 0.075 mmol) was added to a suspension of NaH (60% in mineral oil, 7.2 mg, 1.8 mmol) in THF (0.75 mL) at 0 °C. After 15 min, acetyl chloride (11 µL, 0.15 mmol) was added. The mixture was allowed to warm to r.t. and stirred for 16 h, at which point the THF was removed under reduced pressure. The remaining residue<sup>24</sup> was cooled to 0 °C and TFA (2 mL) was added. The solution was allowed to warm to r.t. and stirred for 4 h. It was then quenched with saturated aq. NaHCO<sub>3</sub>, extracted with CH<sub>2</sub>Cl<sub>2</sub>, dried over Na<sub>2</sub>SO<sub>4</sub>, and concentrated. The crude material was purified by flash-column chromatography (3:1 hexanes/EtOAc) to give **16** (7.3 mg, 46% yield). **IR** (thin film) 2980, 2925, 1769, 1715, 1685, 1372, 1237, 1095, 957 cm<sup>-1</sup>; **<sup>1</sup>H NMR** (300 MHz, CDCl<sub>3</sub>) δ 6.68 (dd, *J* = 10.4, 2.1 Hz, 1 H), 6.08 (d, 10.4 Hz, 1 H), 3.52 (d, 12.0 Hz, 1 H), 3.38 (dddd, *J* = 12.0, 5.5, 2.1, 2.1 Hz, 1 H), 2.73 (dd, *J* = 17.7, 5.5 Hz, 1 H), 2.55 (d, *J* = 17.7 Hz, 1 H), 2.46 (s, 3 H), 1.71 (s, 3 H); **<sup>13</sup>C NMR** (75 MHz, CDCl<sub>3</sub>, DEPT) δ 199.3 (C), 195.0 (C), 169.5 (C), 147.0 (CH), 129.7 (CH), 80.4 (C), 57.8 (CH), 41.9 (CH), 36.3 (CH<sub>2</sub>), 30.3 (CH<sub>3</sub>), 24.0 (CH<sub>3</sub>); **HRMS** (ESI-) 207.0663 calcd for C<sub>11</sub>H<sub>11</sub>O<sub>4</sub>, found 207.0684.

<sup>24</sup> The crude residue was identified as intermediate **15** by <sup>1</sup>H NMR.

Copies of <sup>1</sup>H and <sup>13</sup>C NMR spectra

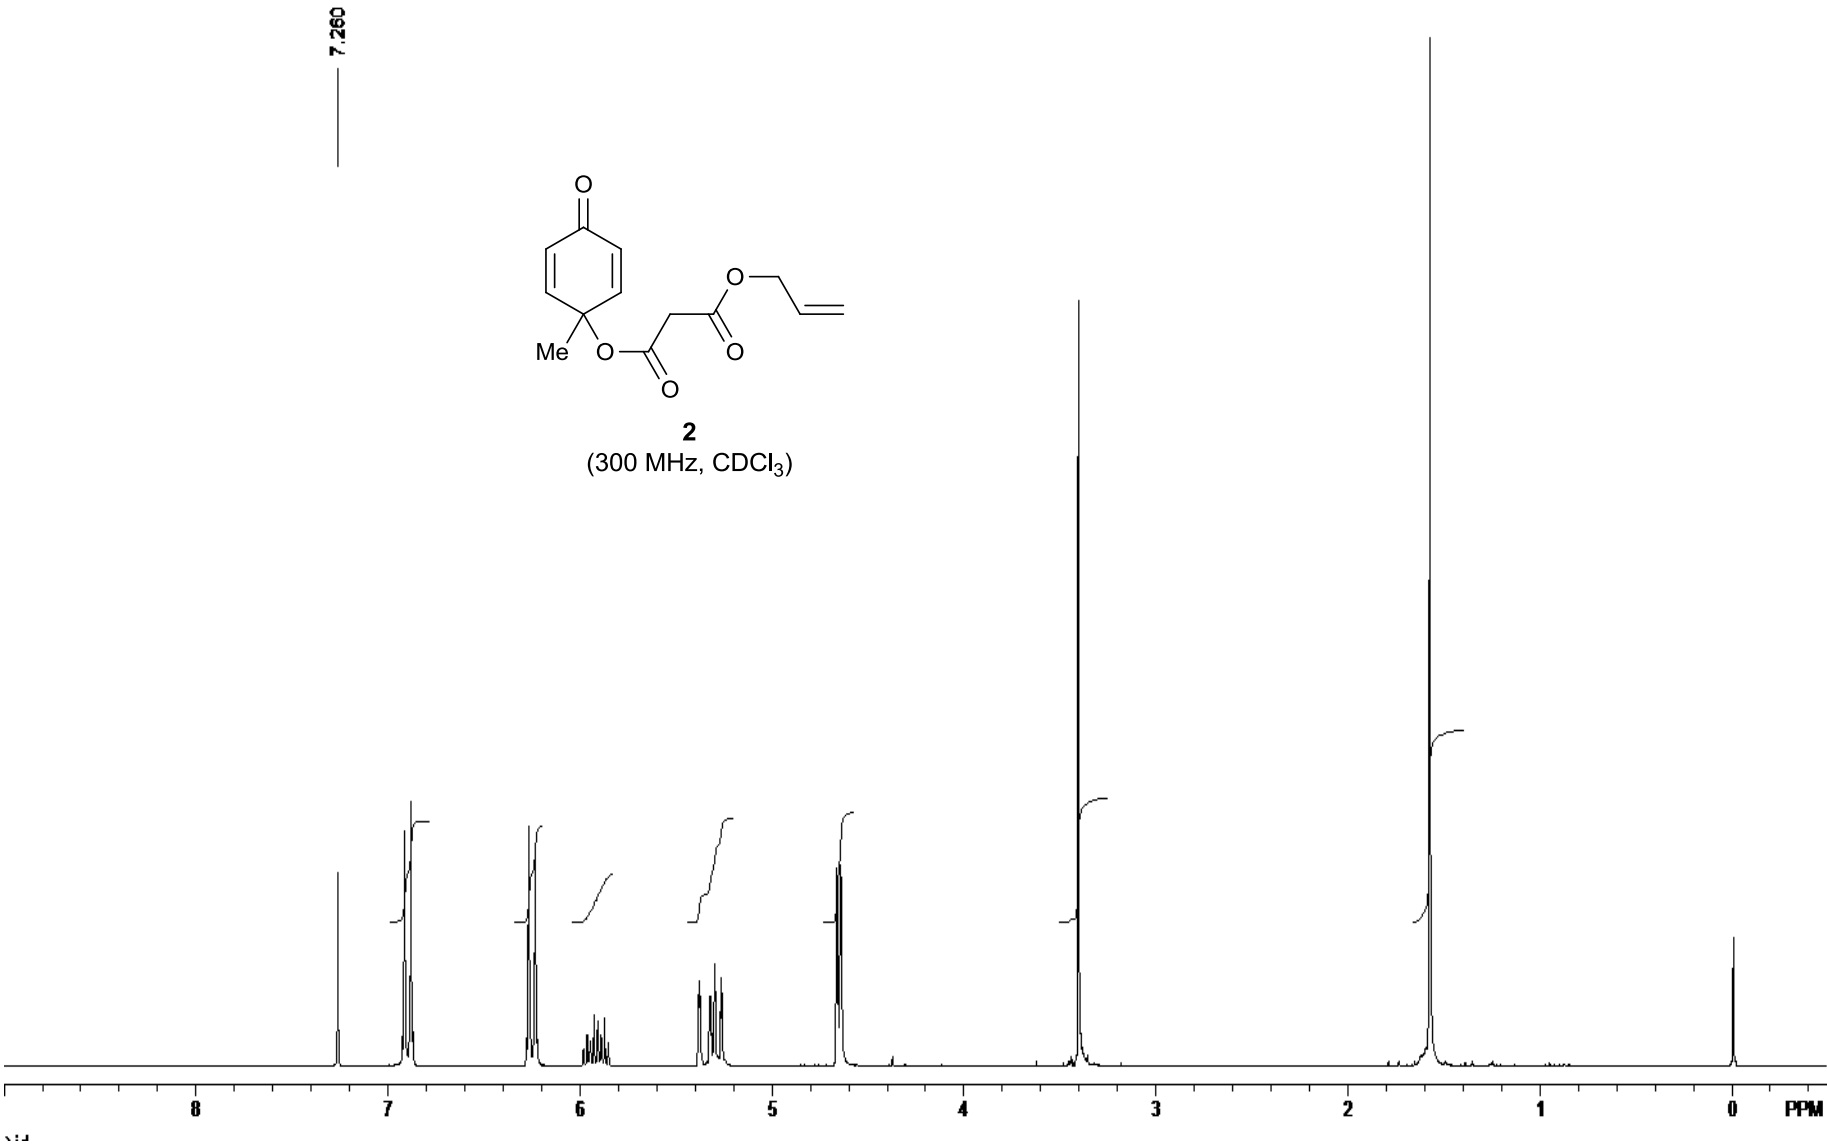

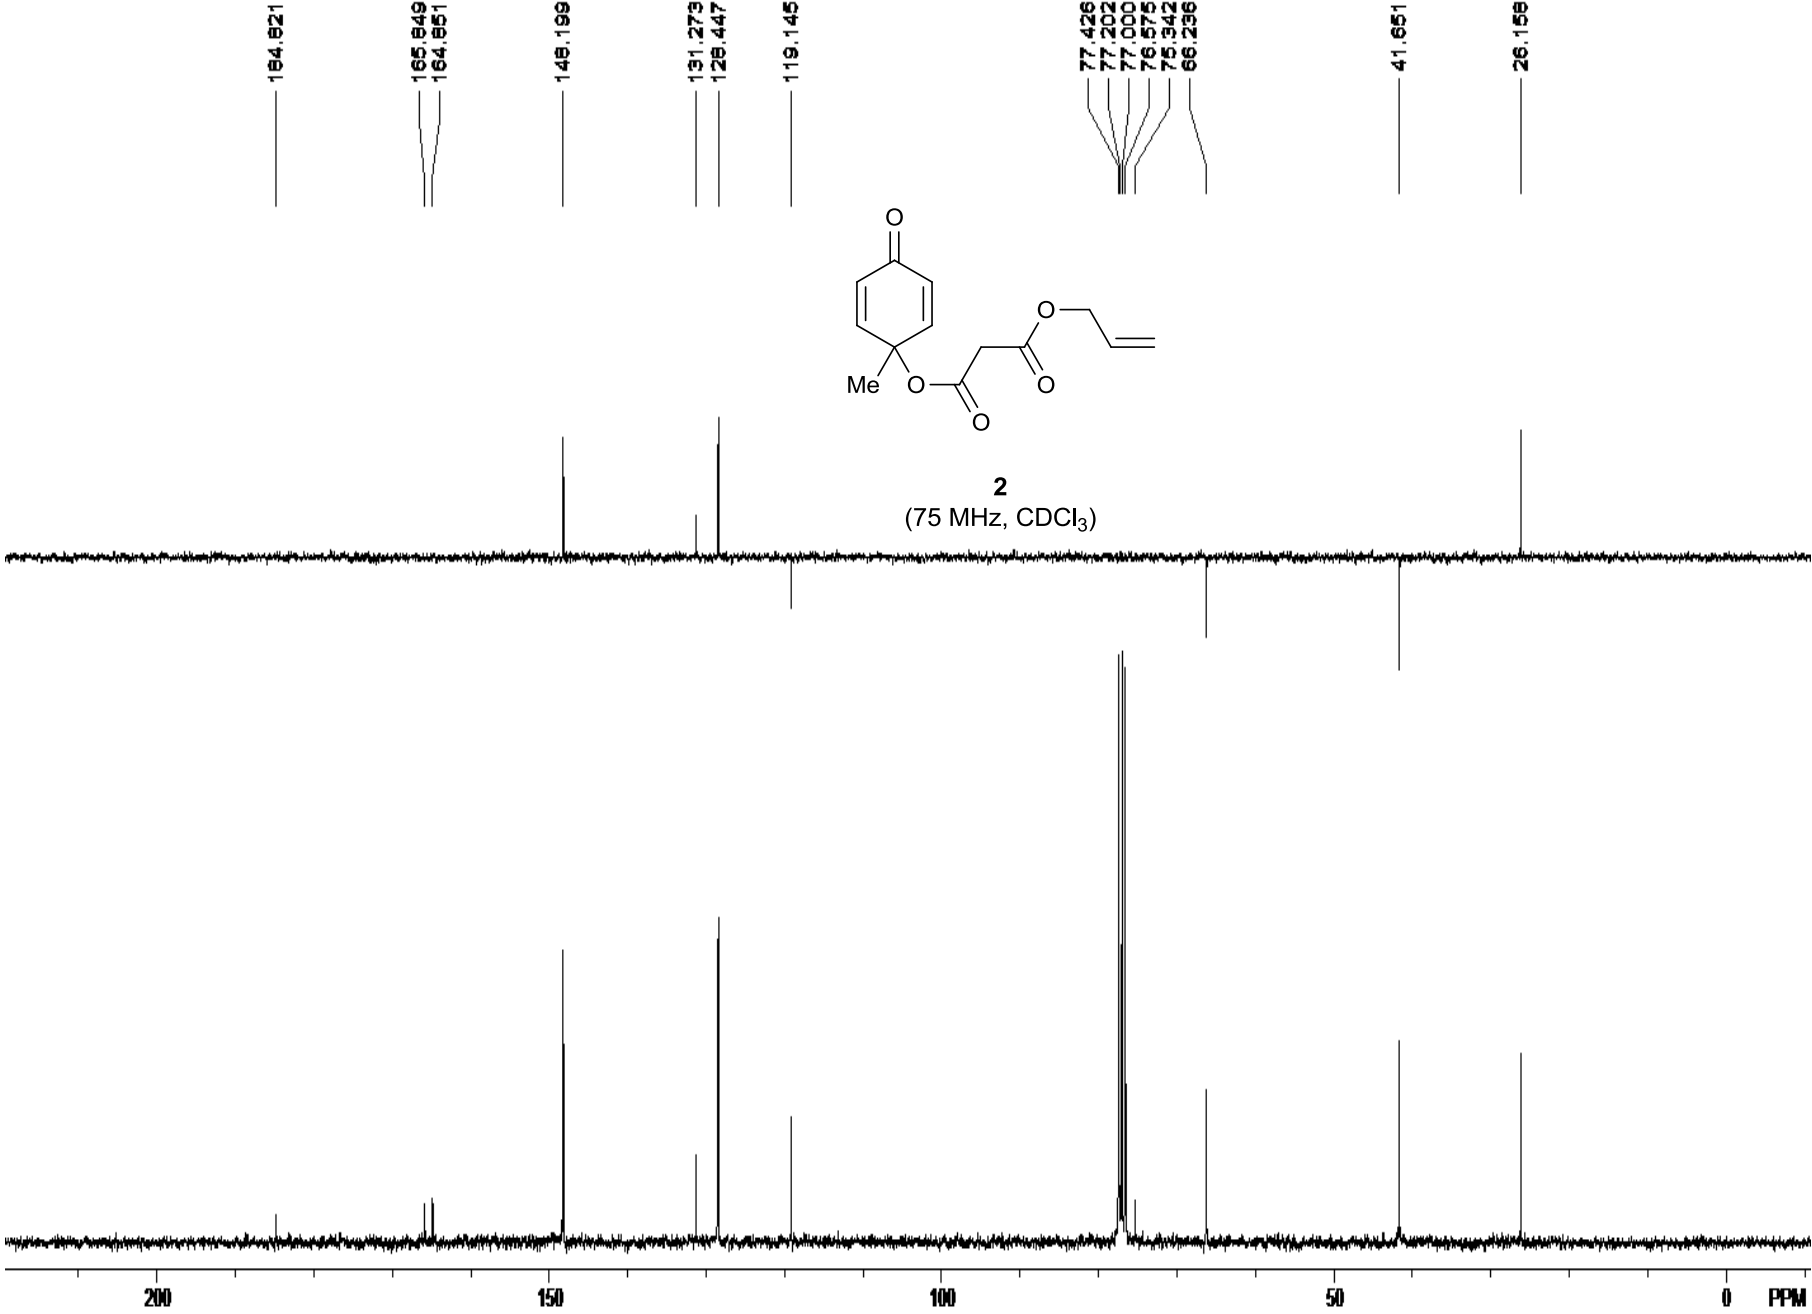



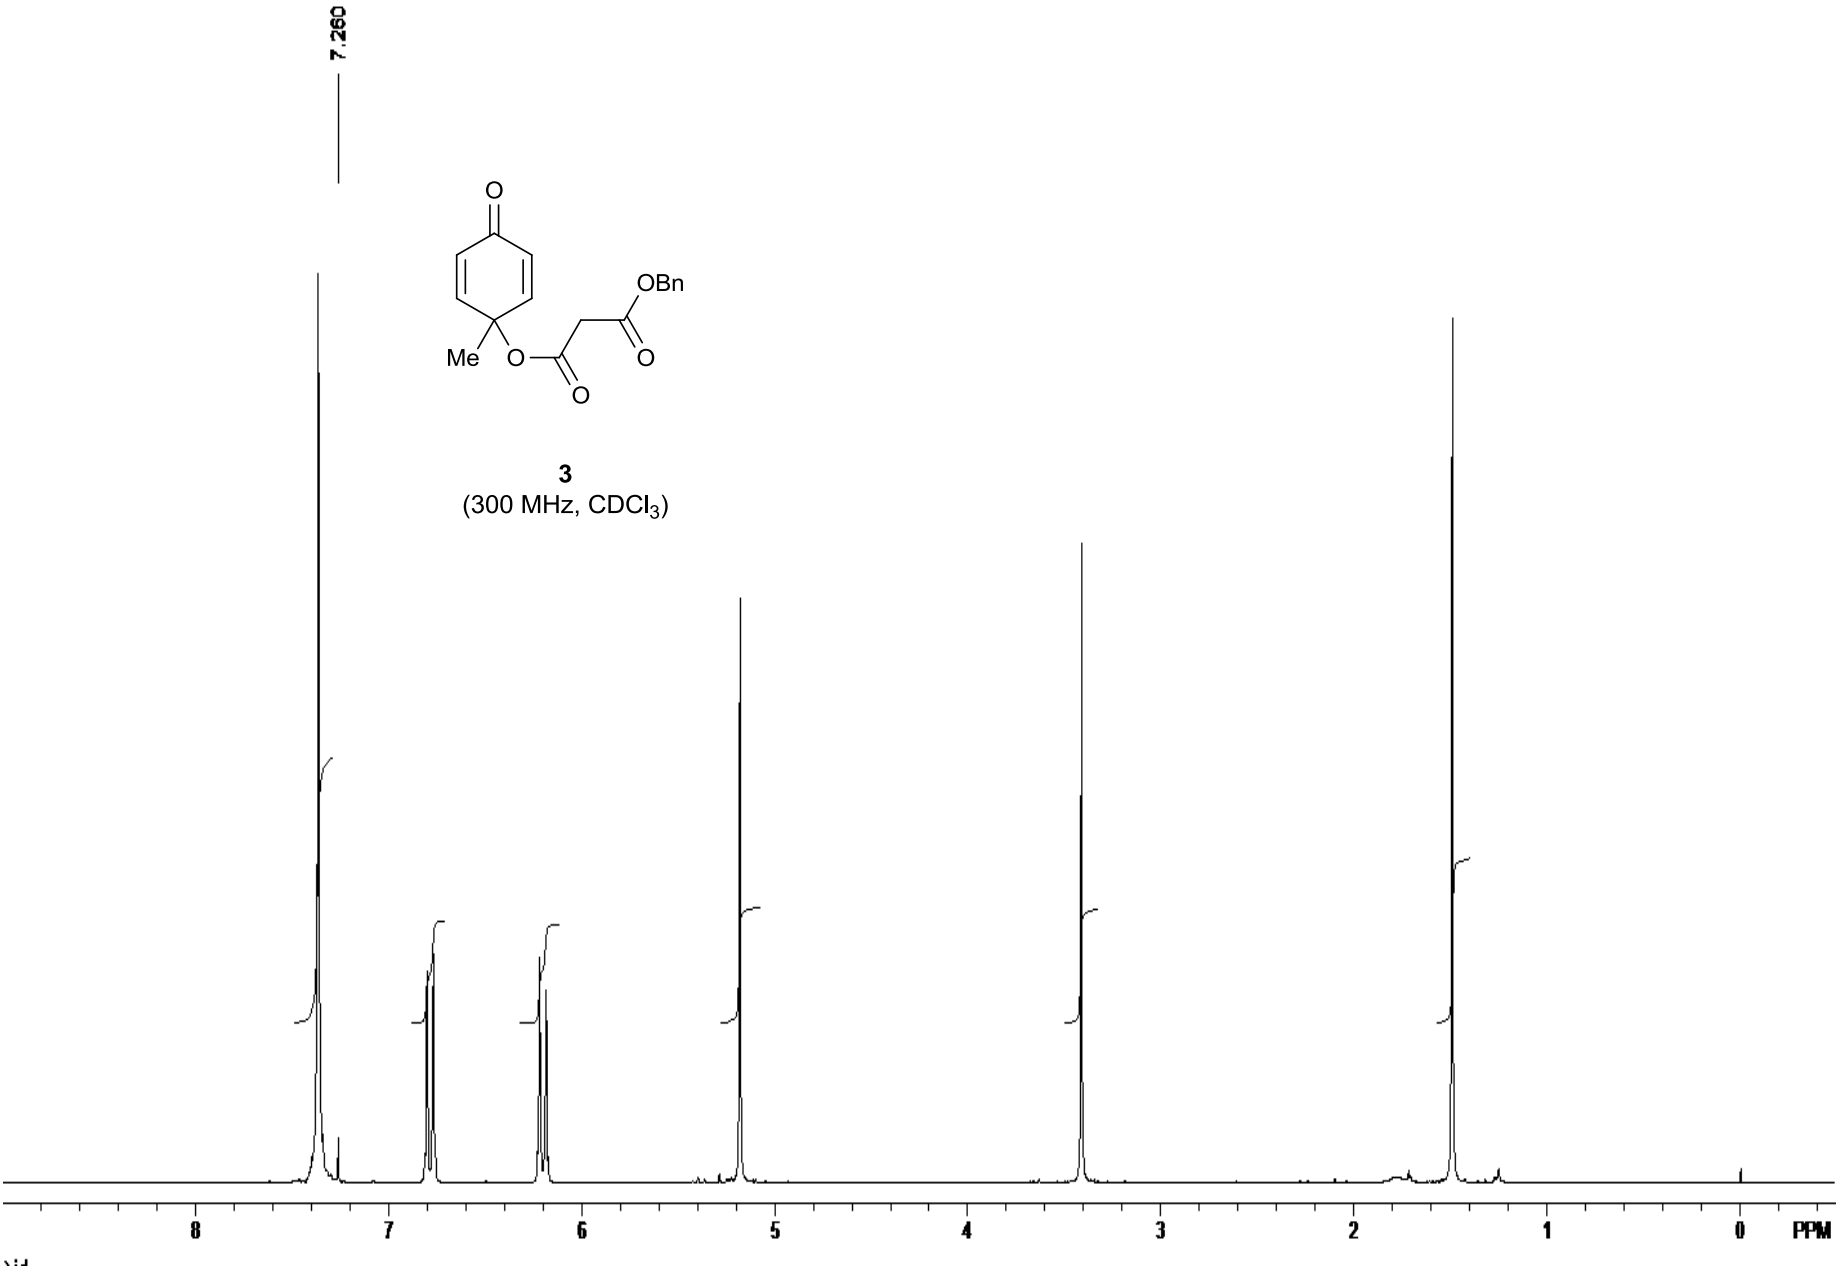

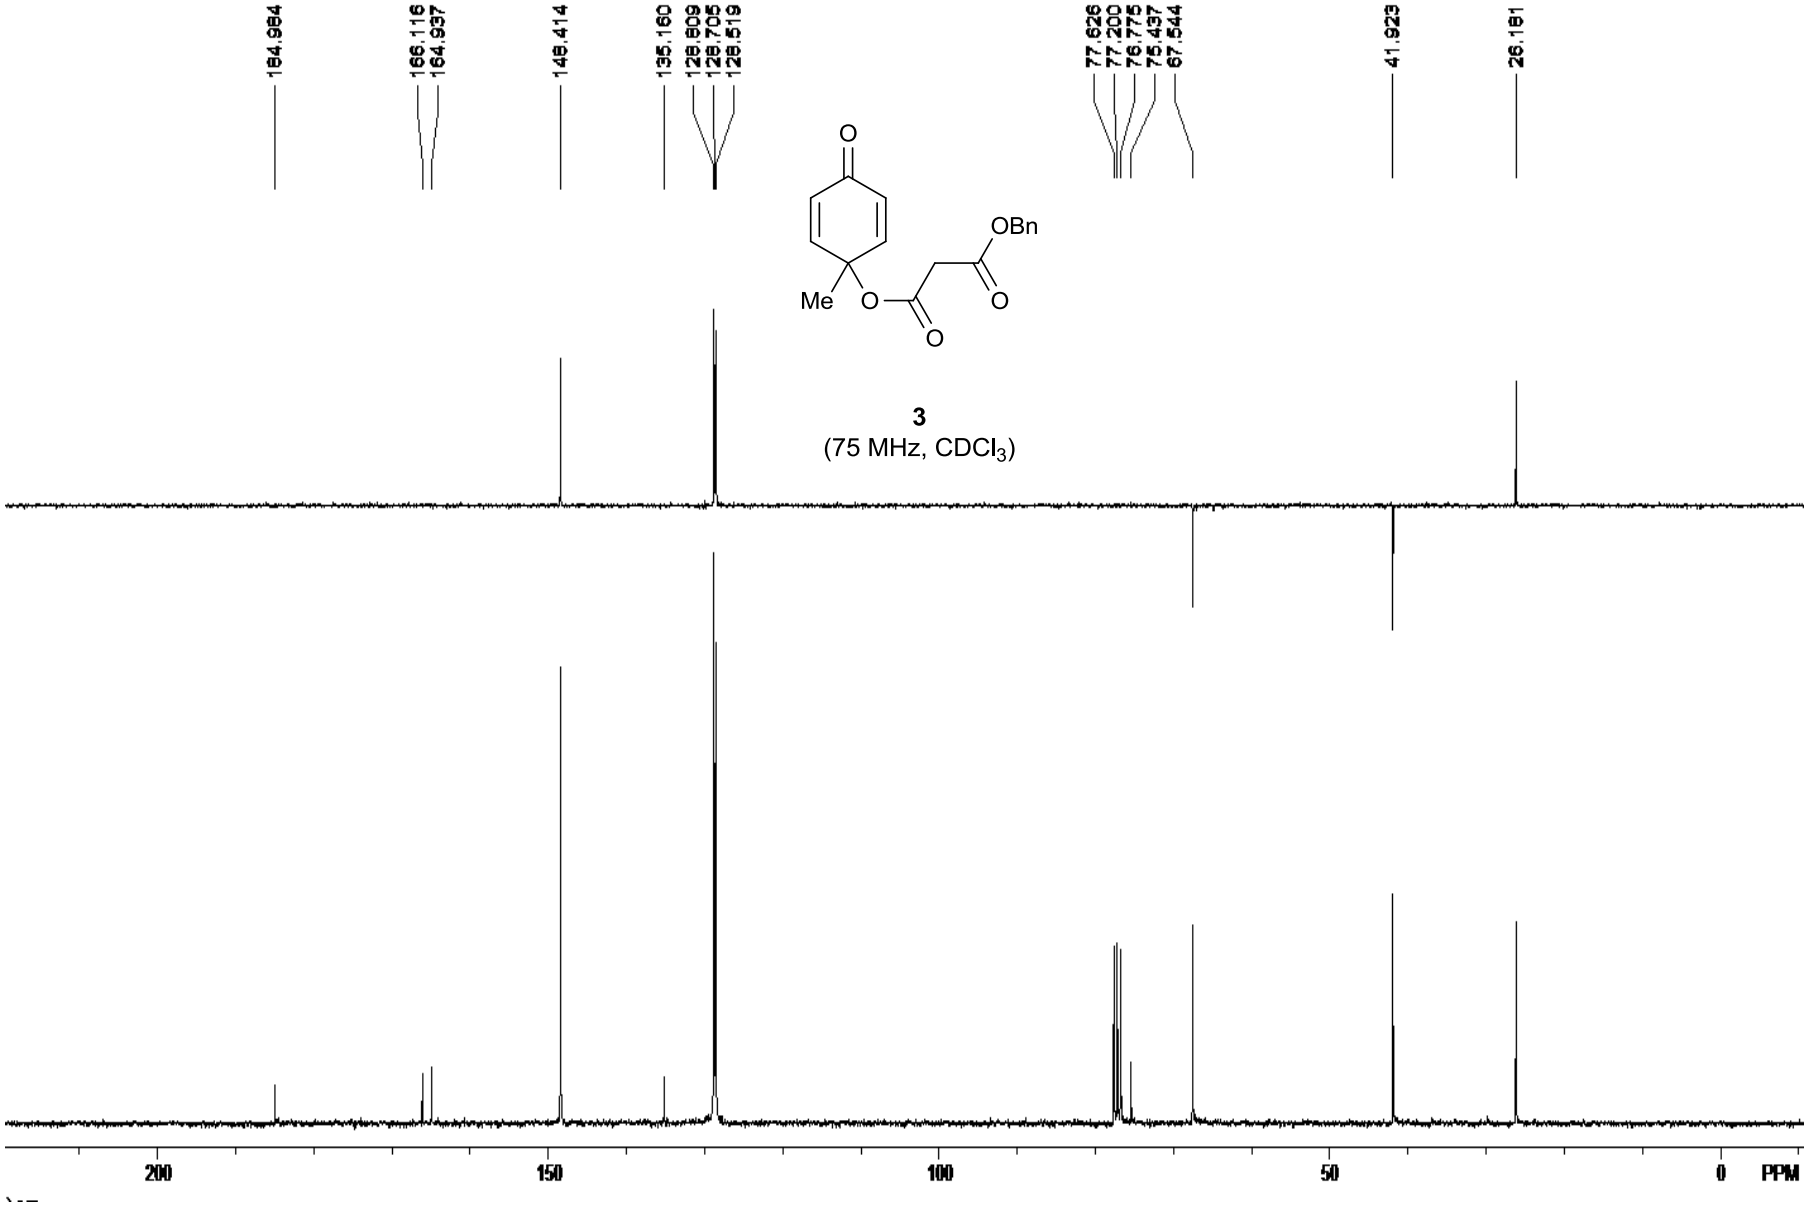

7.160

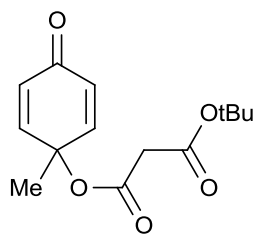

**4a**  
(300 MHz, C<sub>6</sub>D<sub>6</sub>)

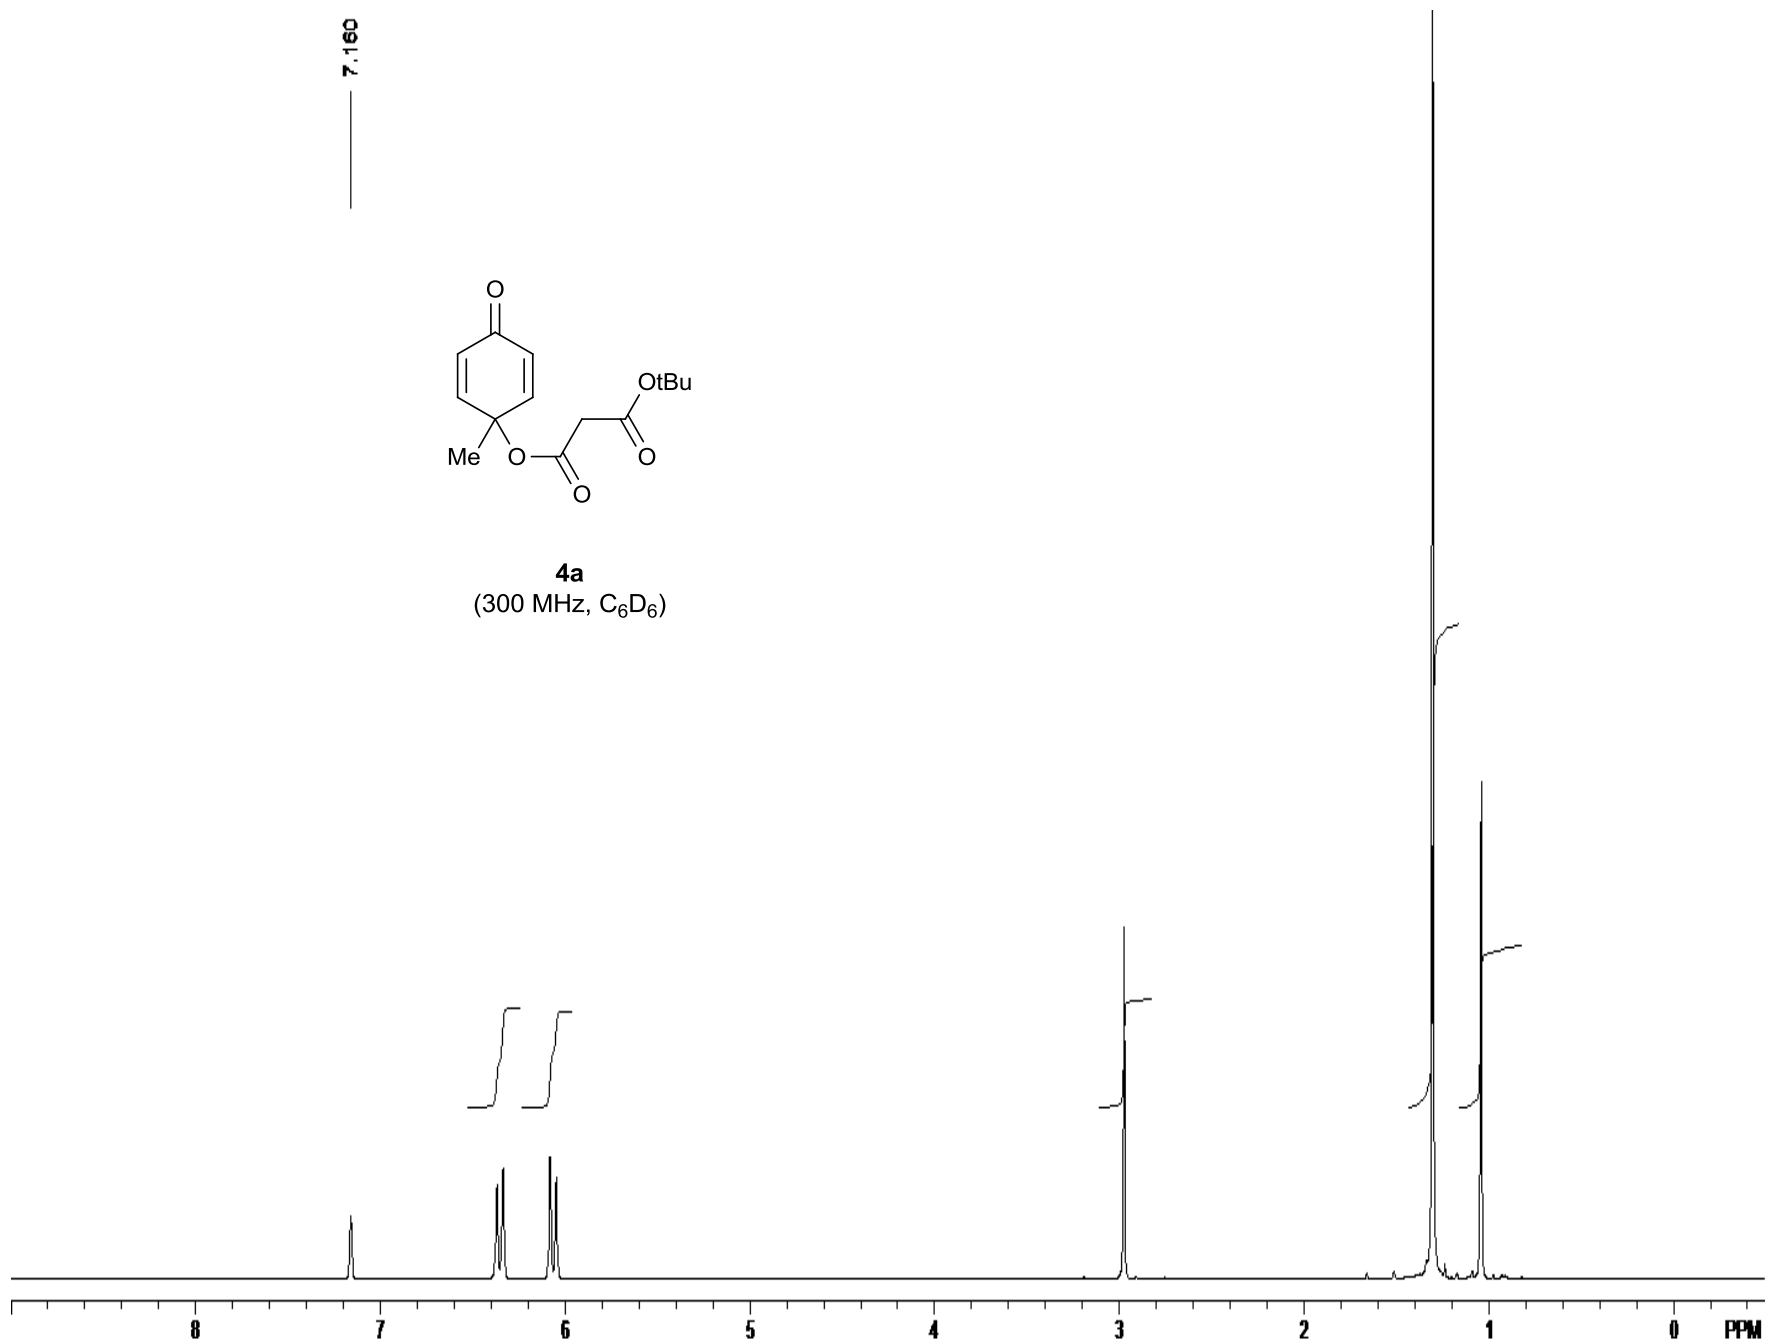

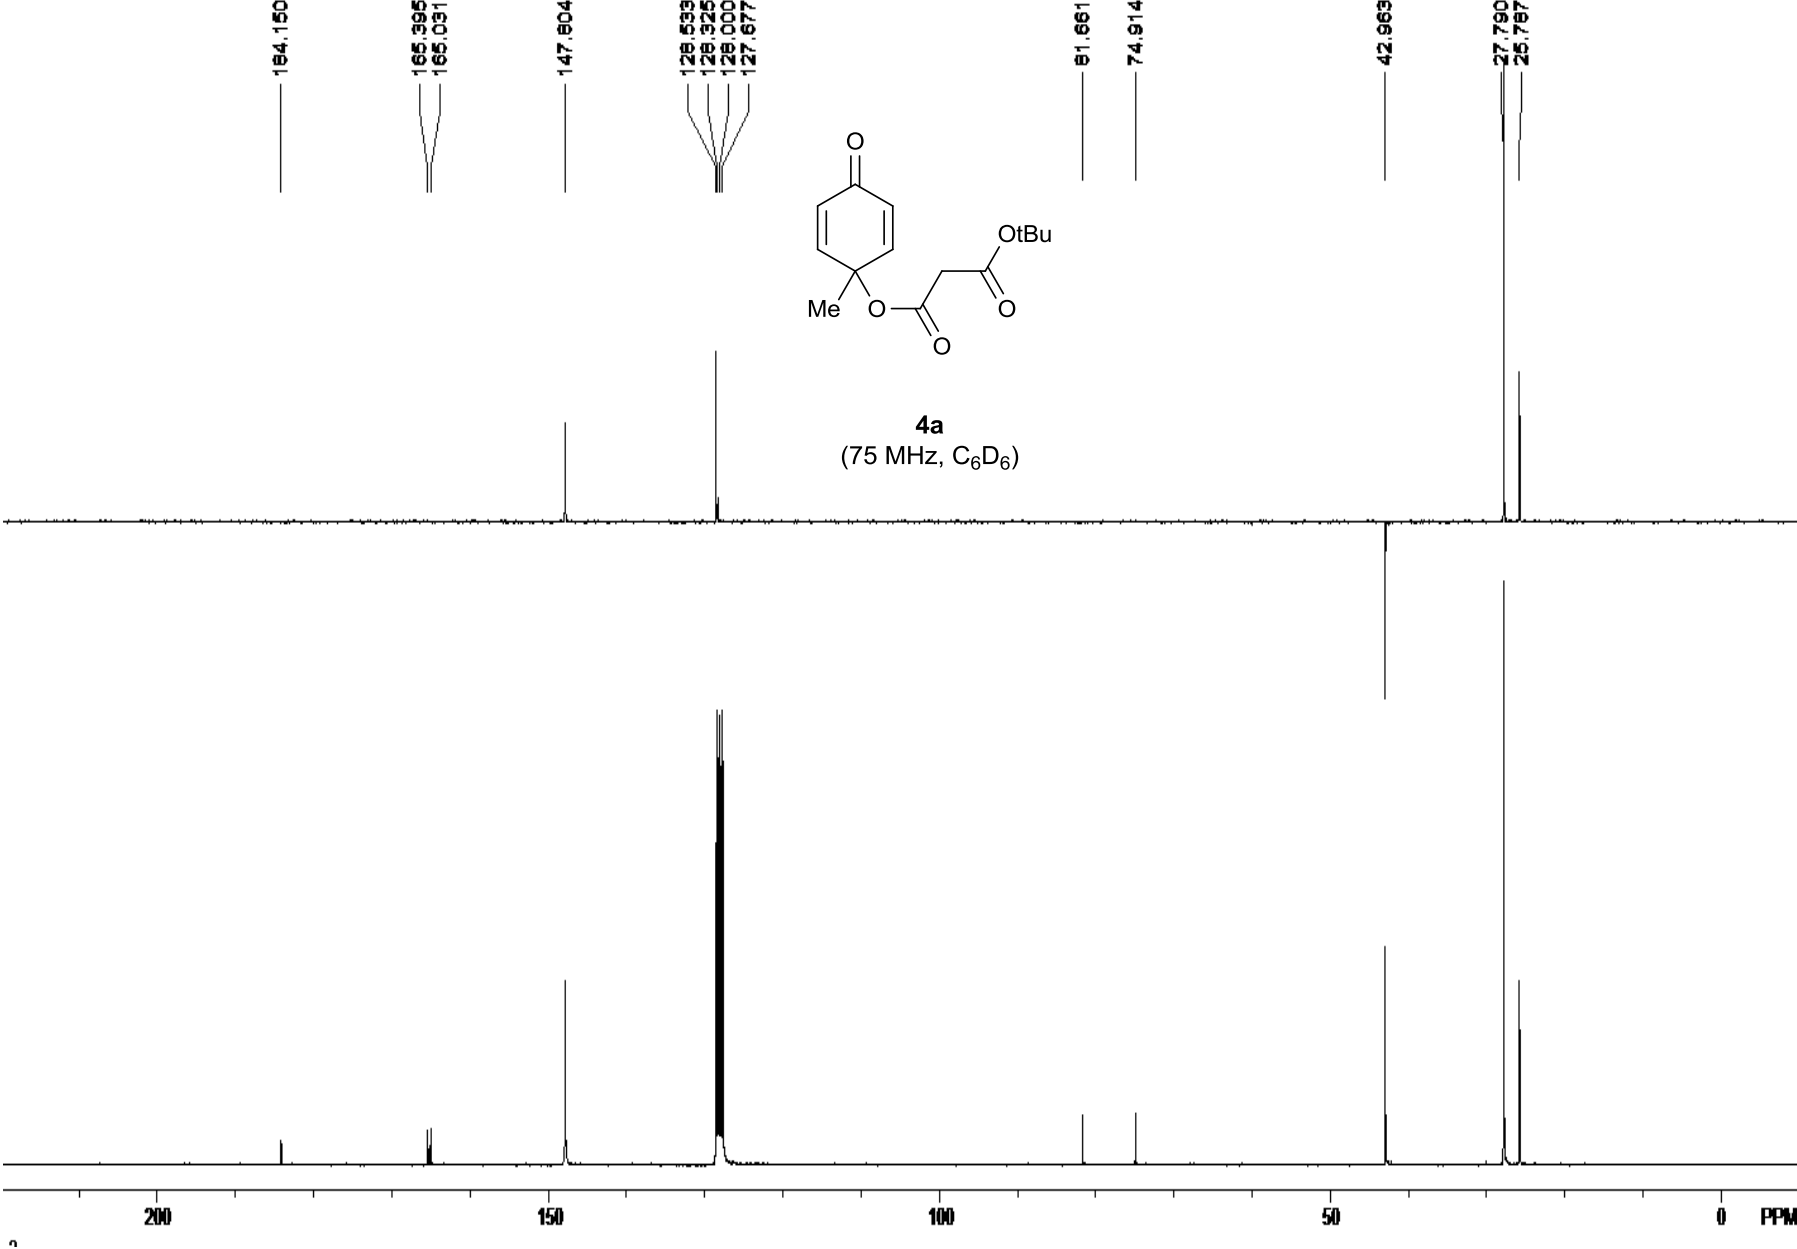

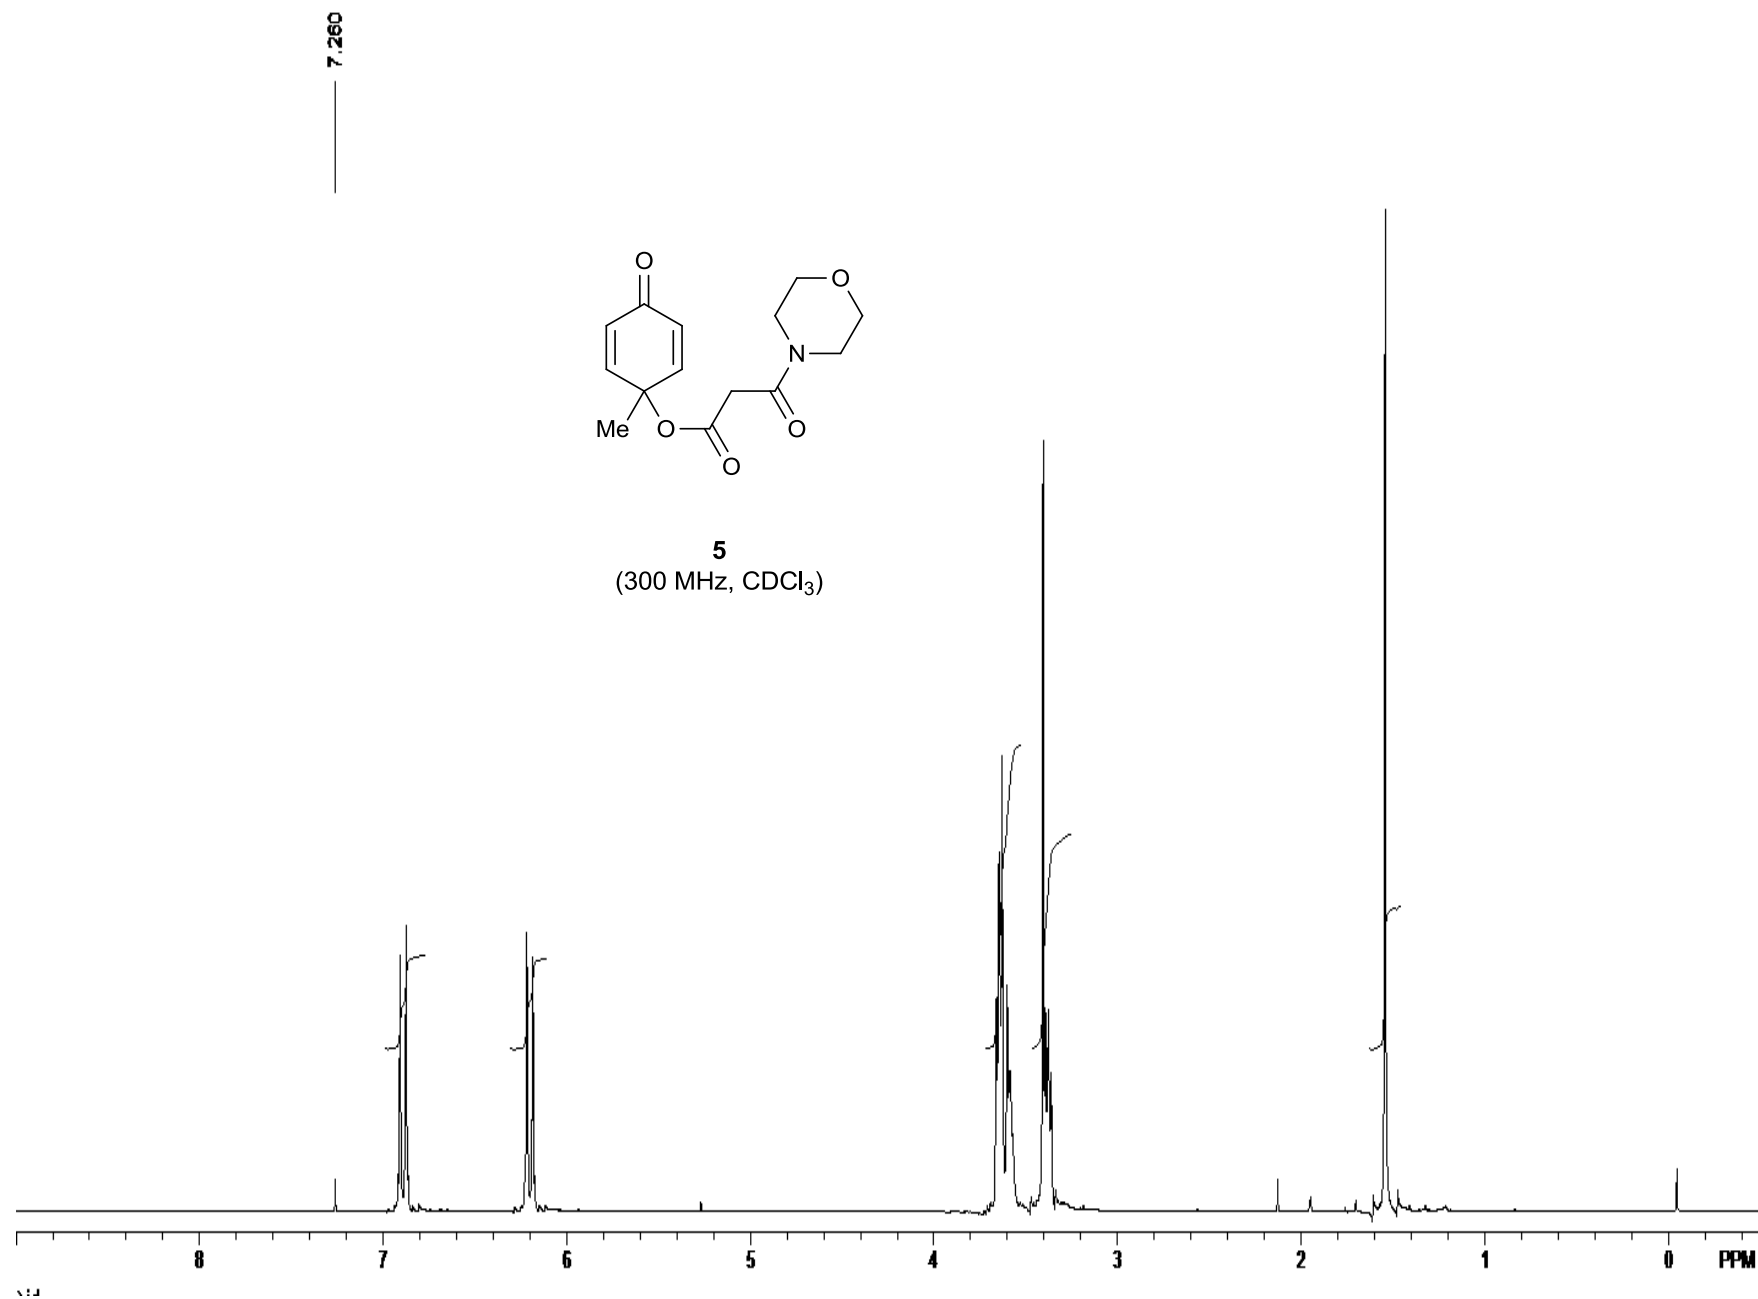

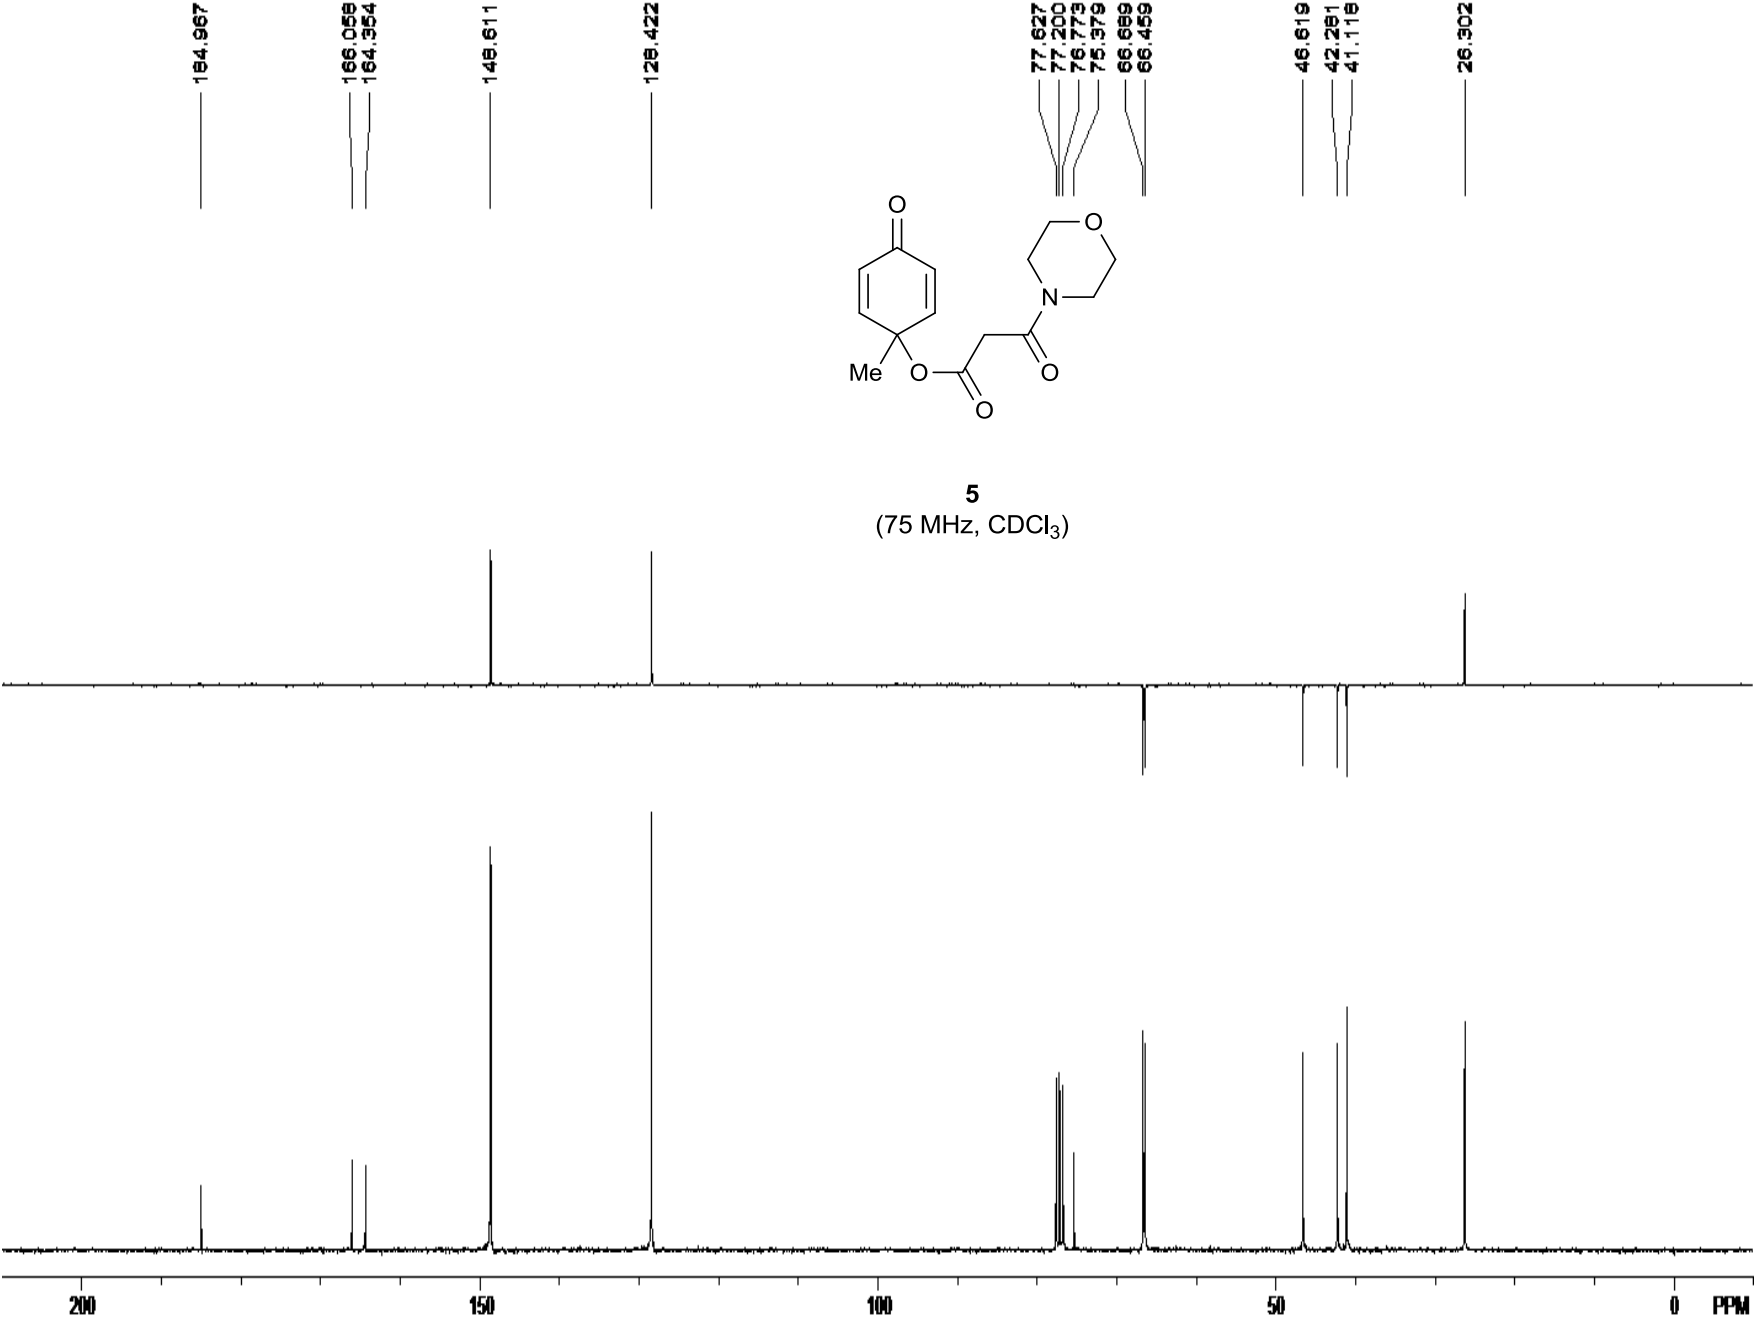

7.260

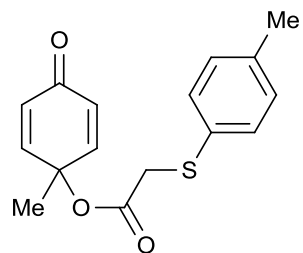

**S1**  
(300 MHz, CDCl<sub>3</sub>)

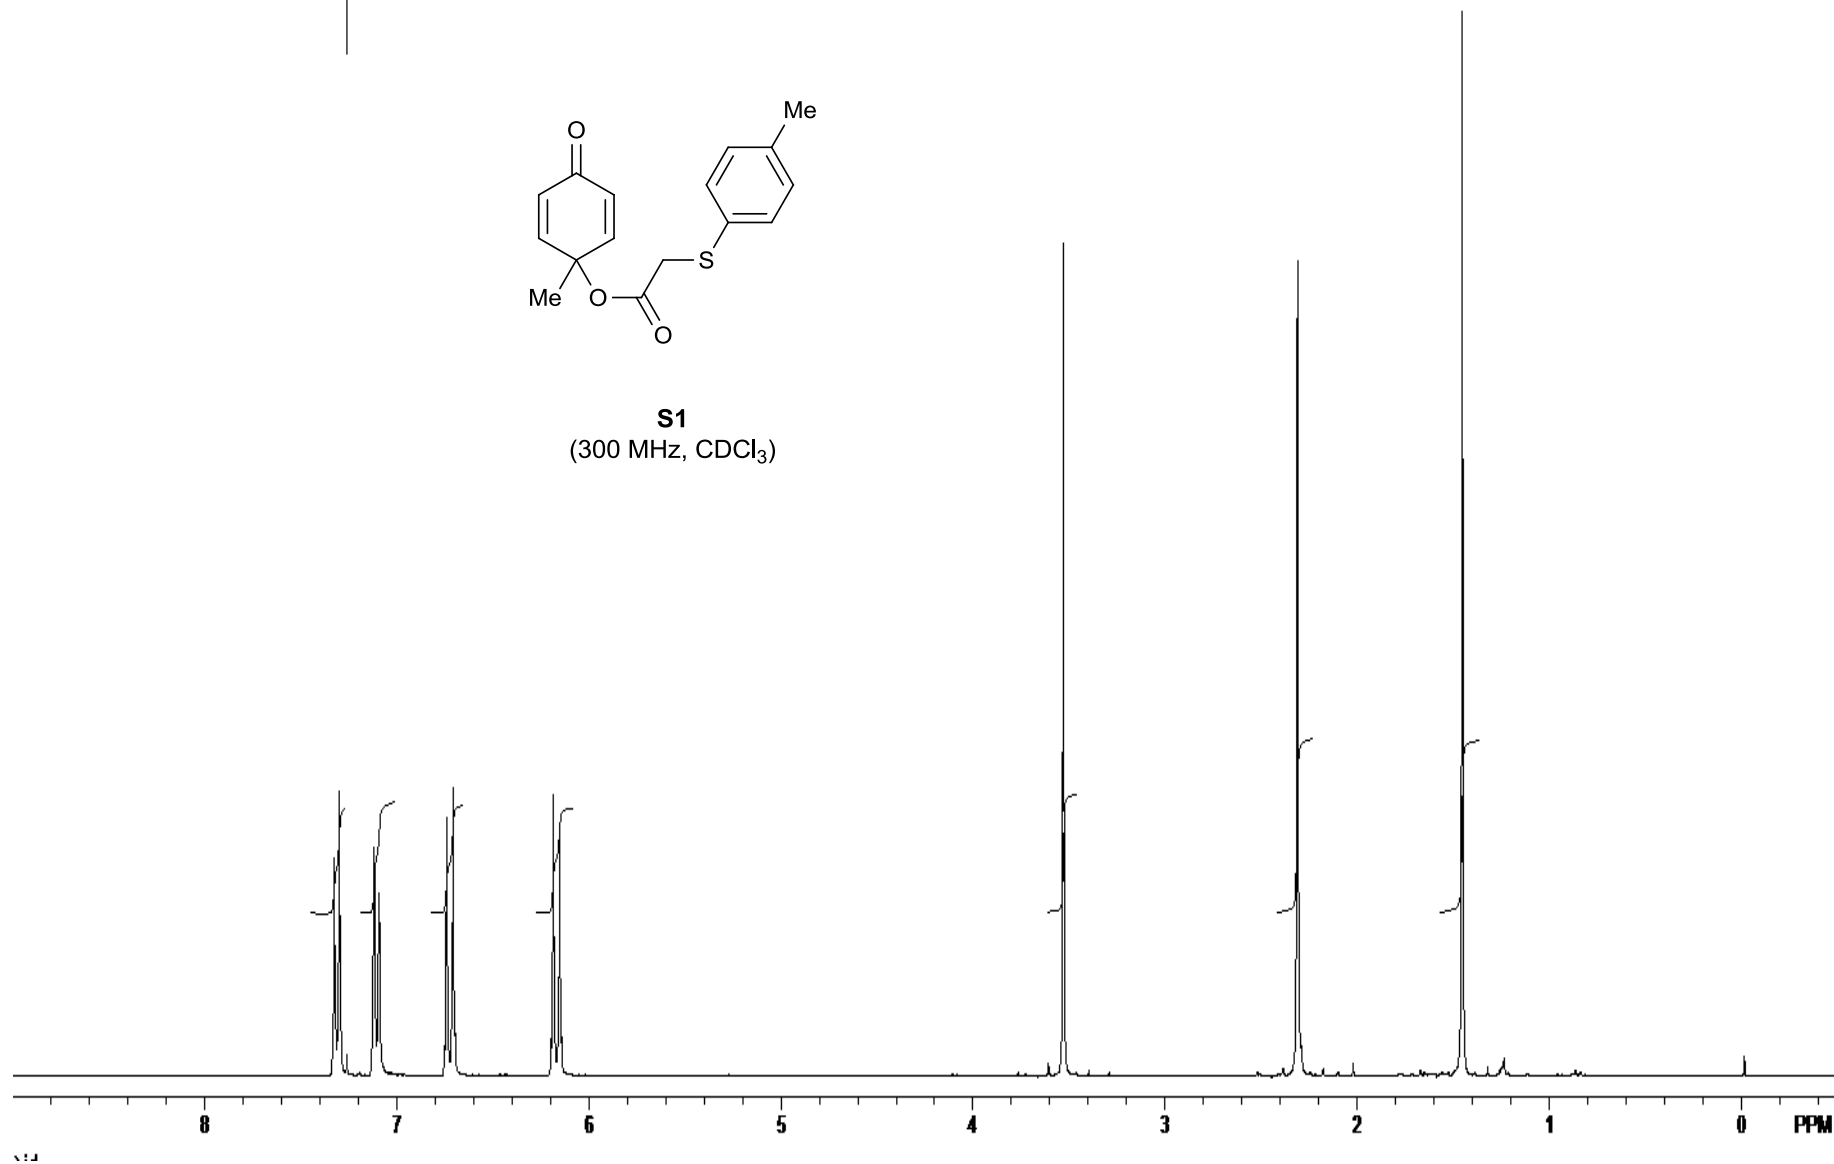

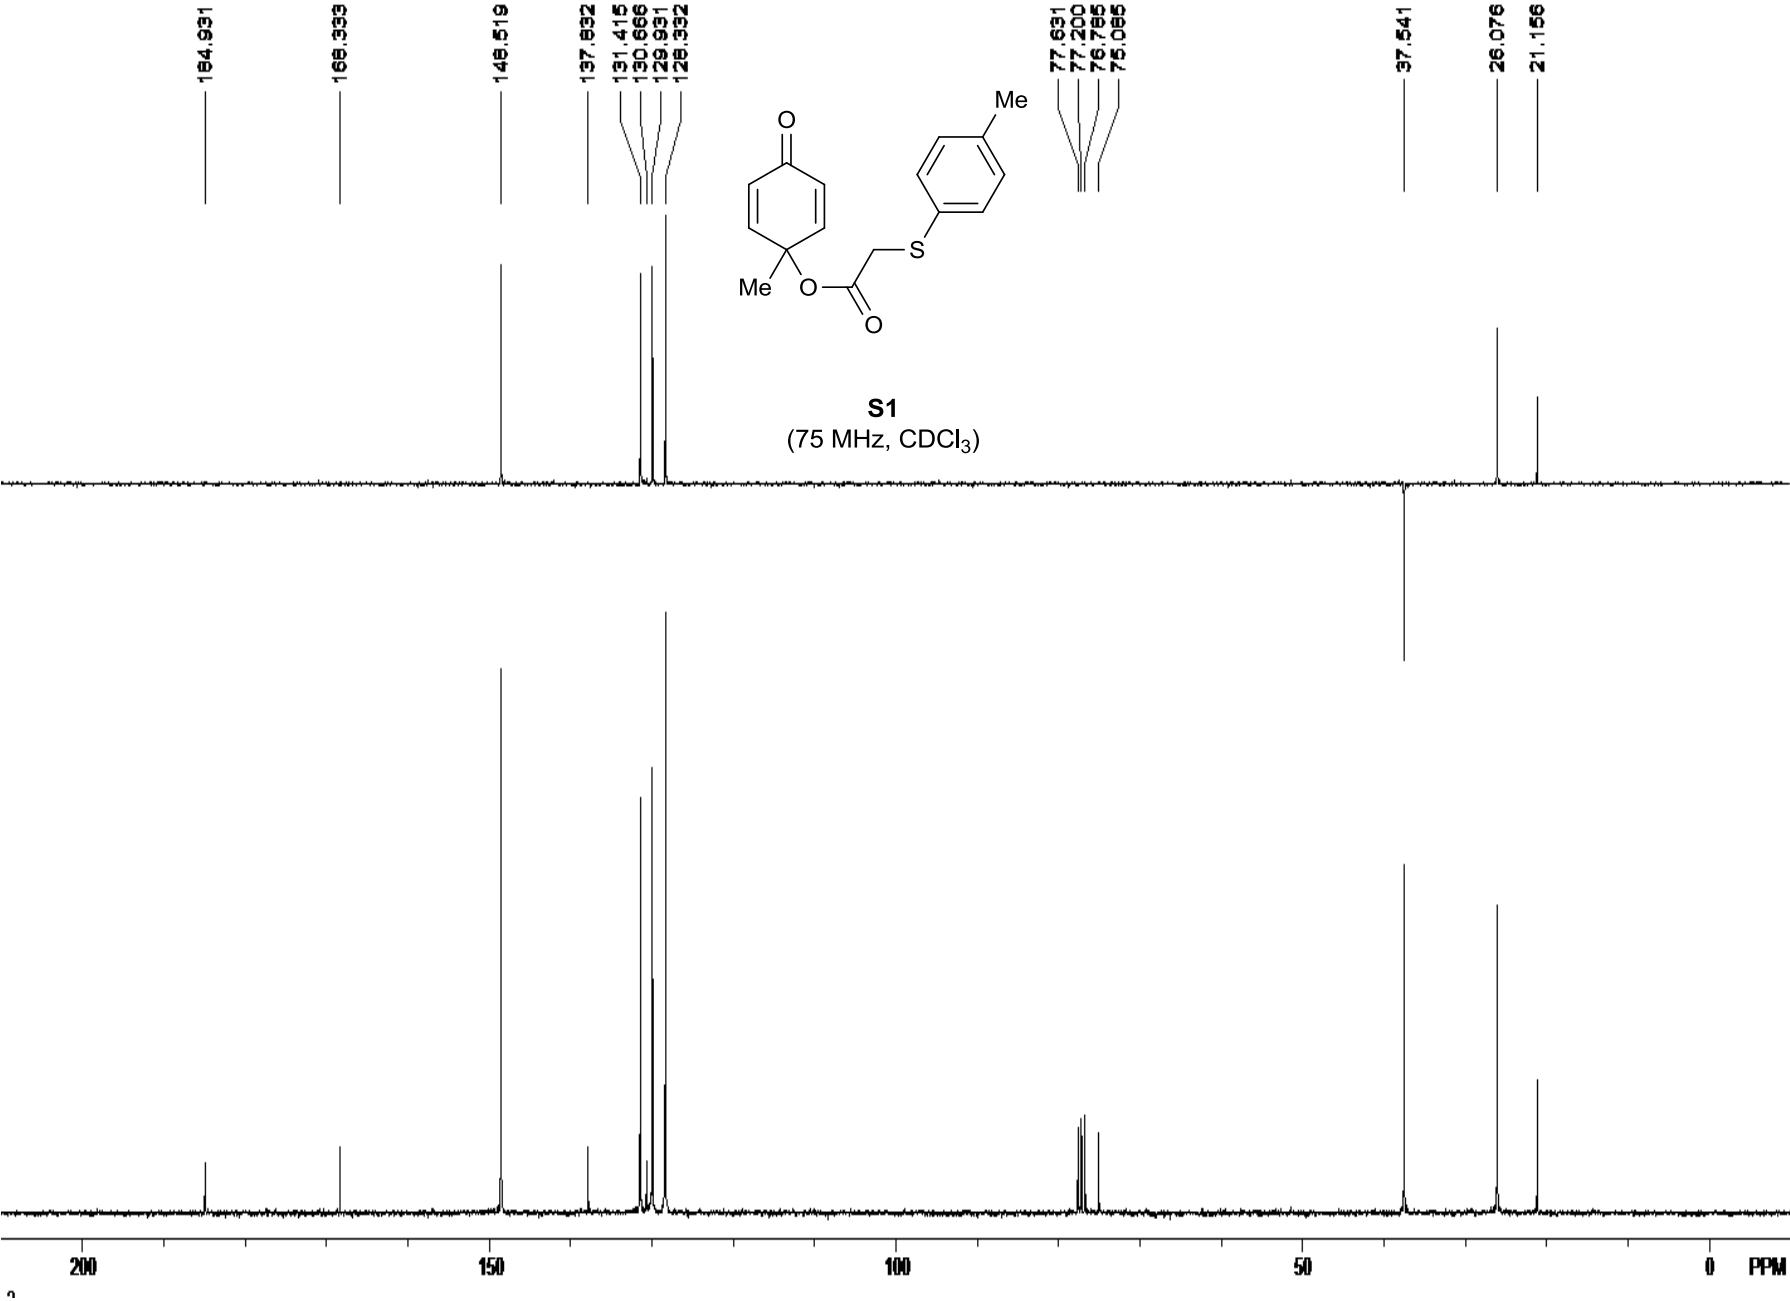



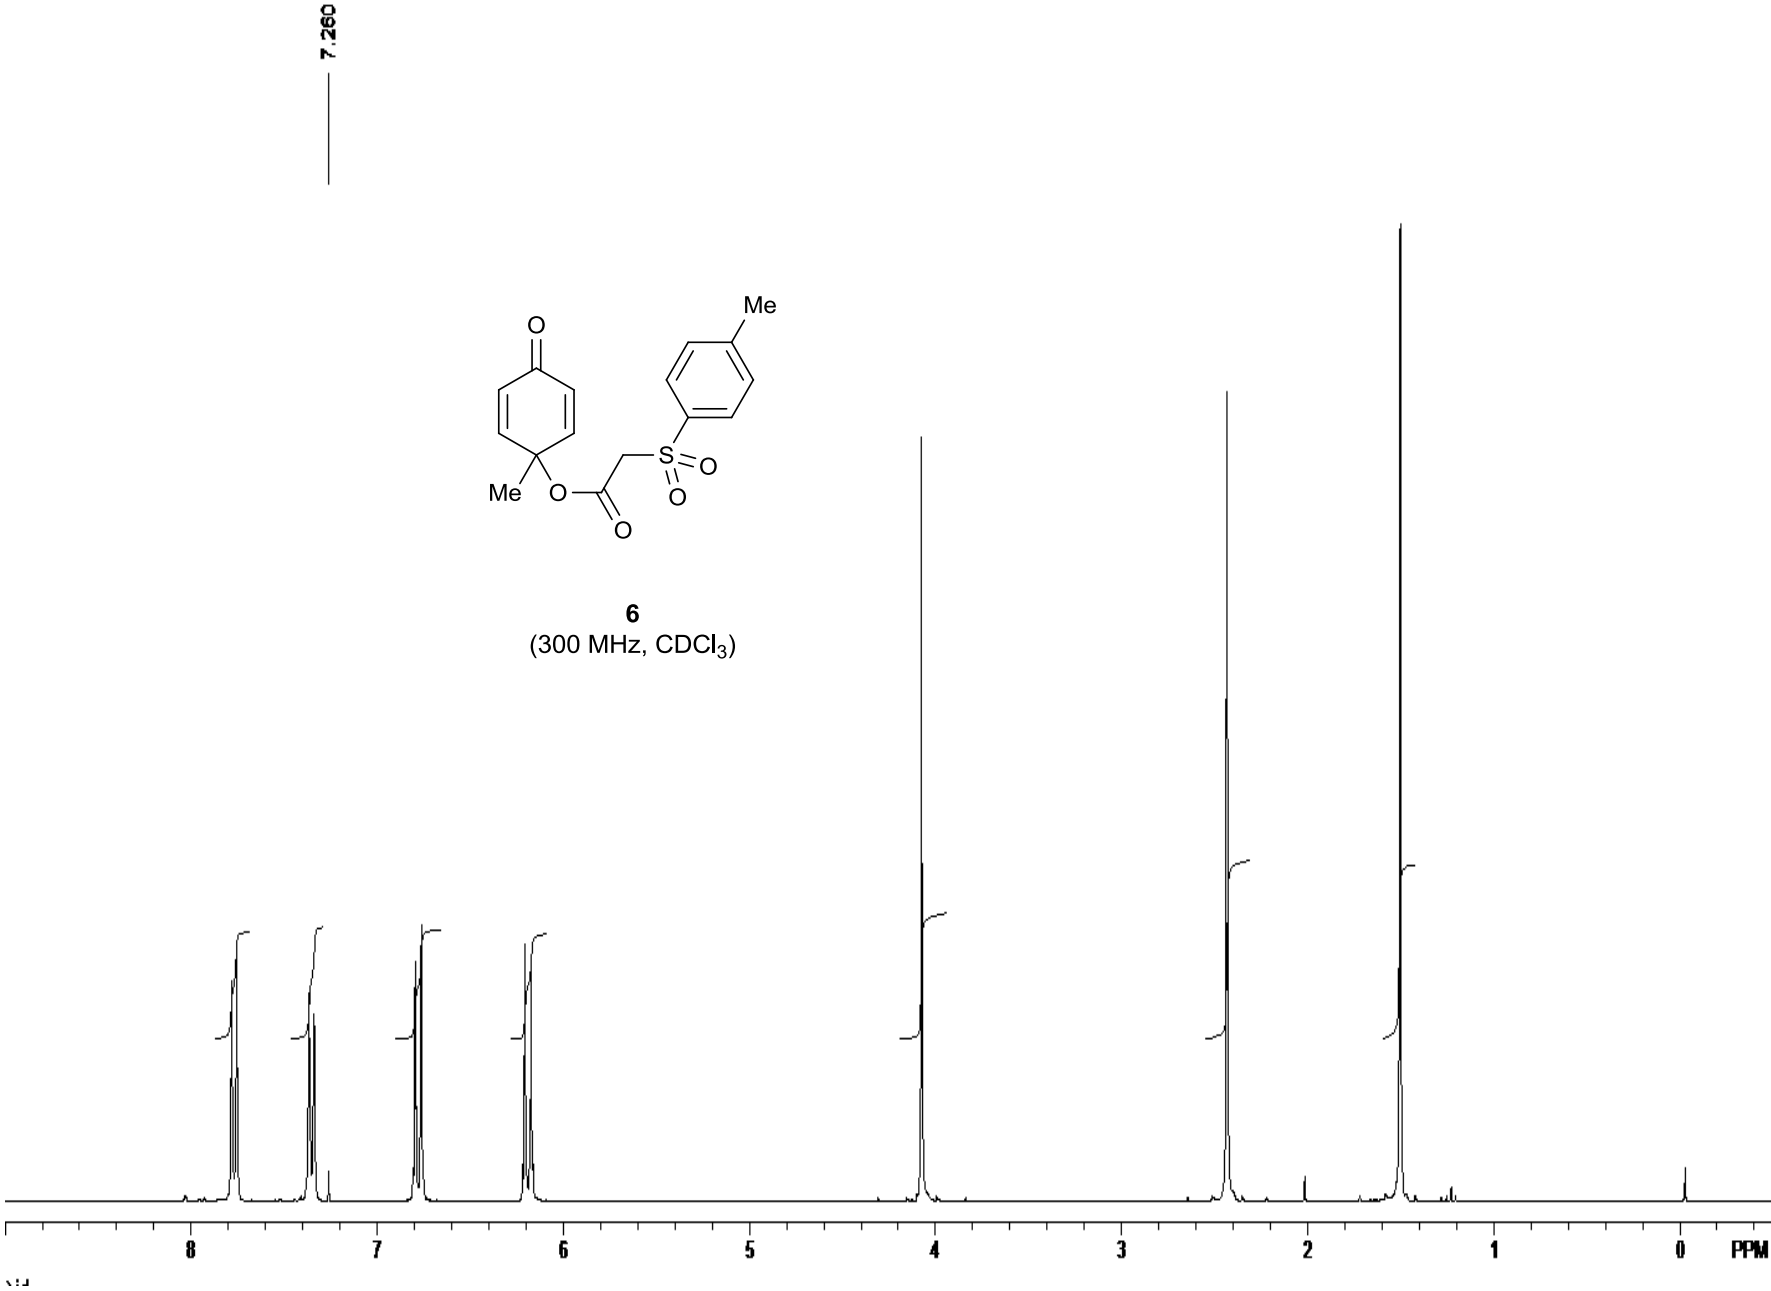

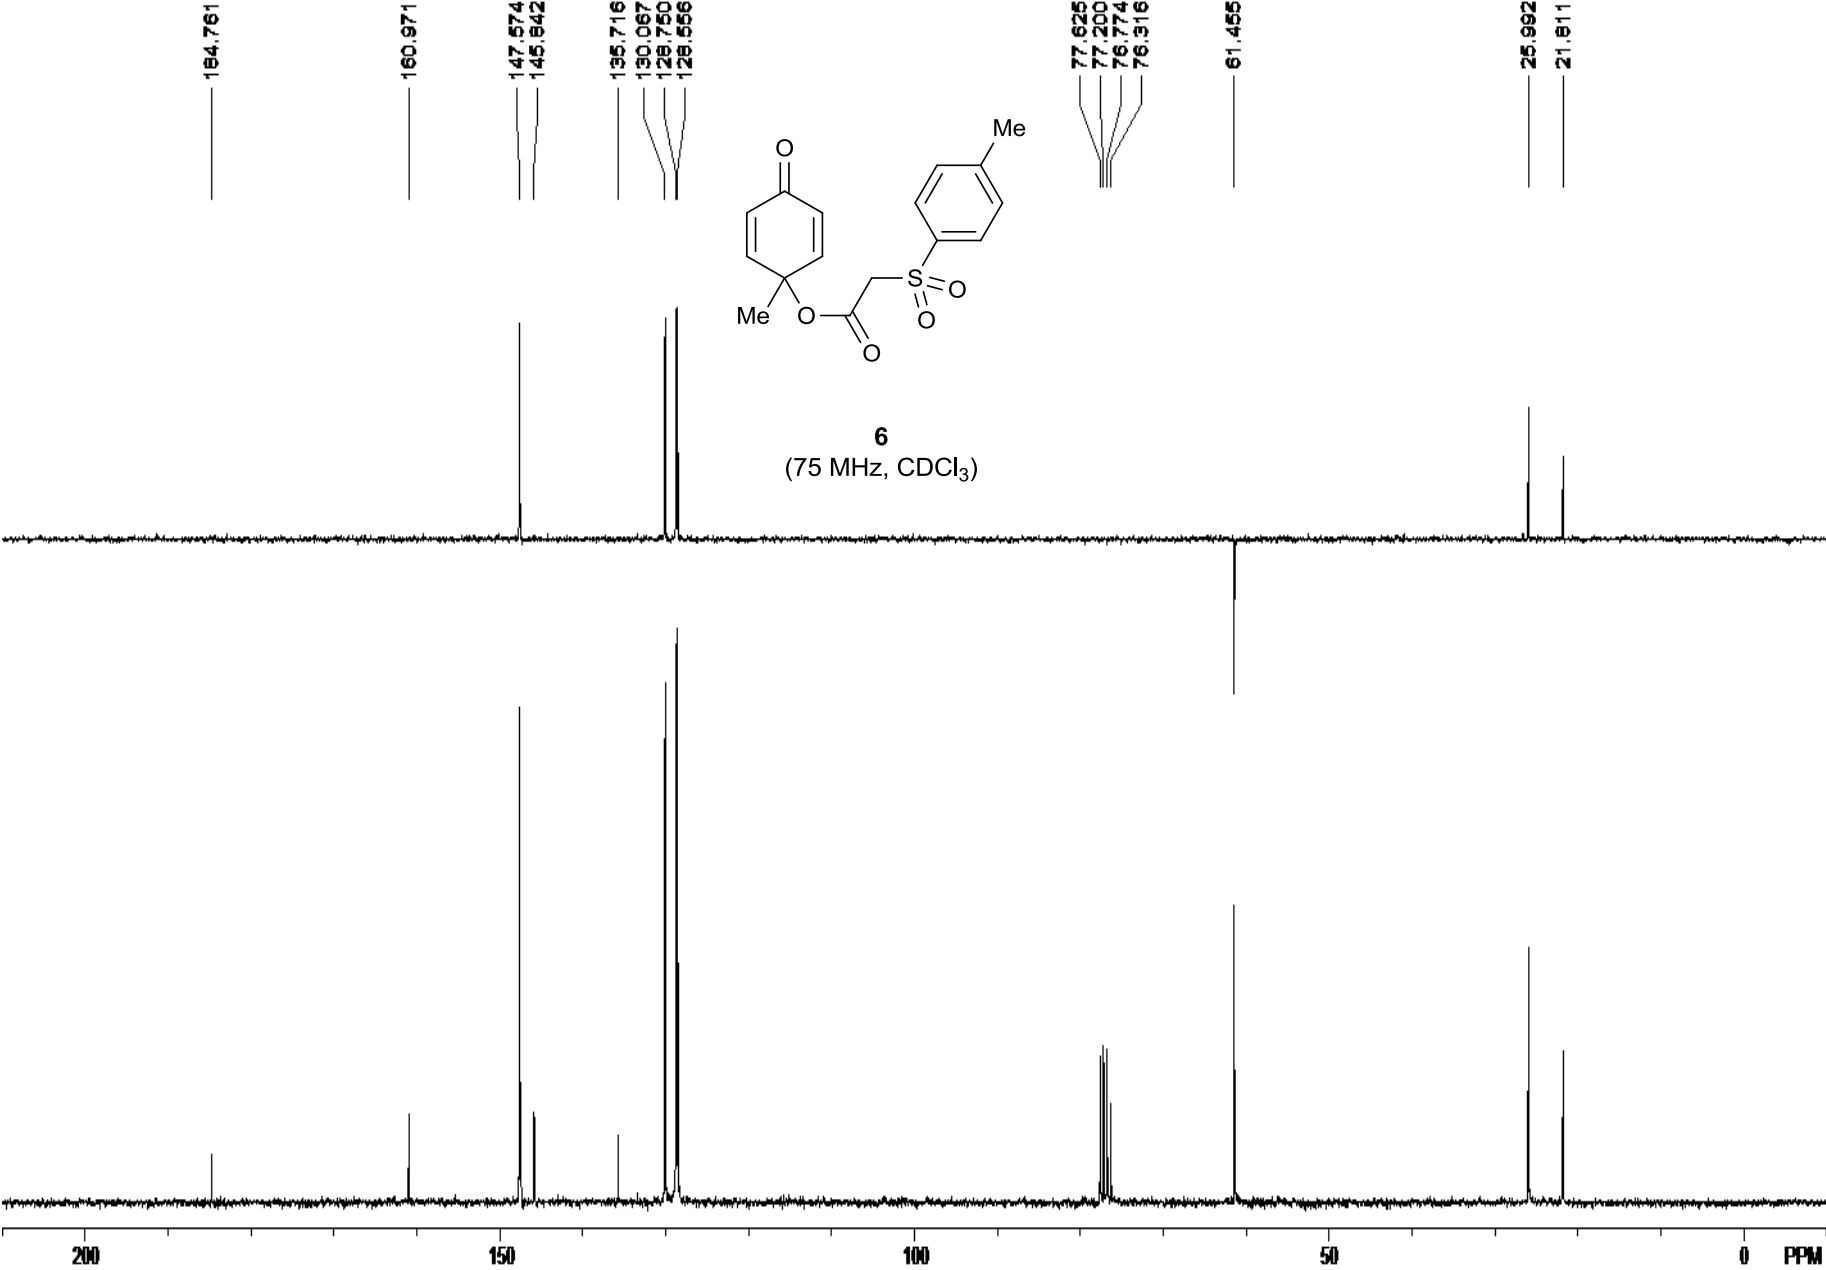

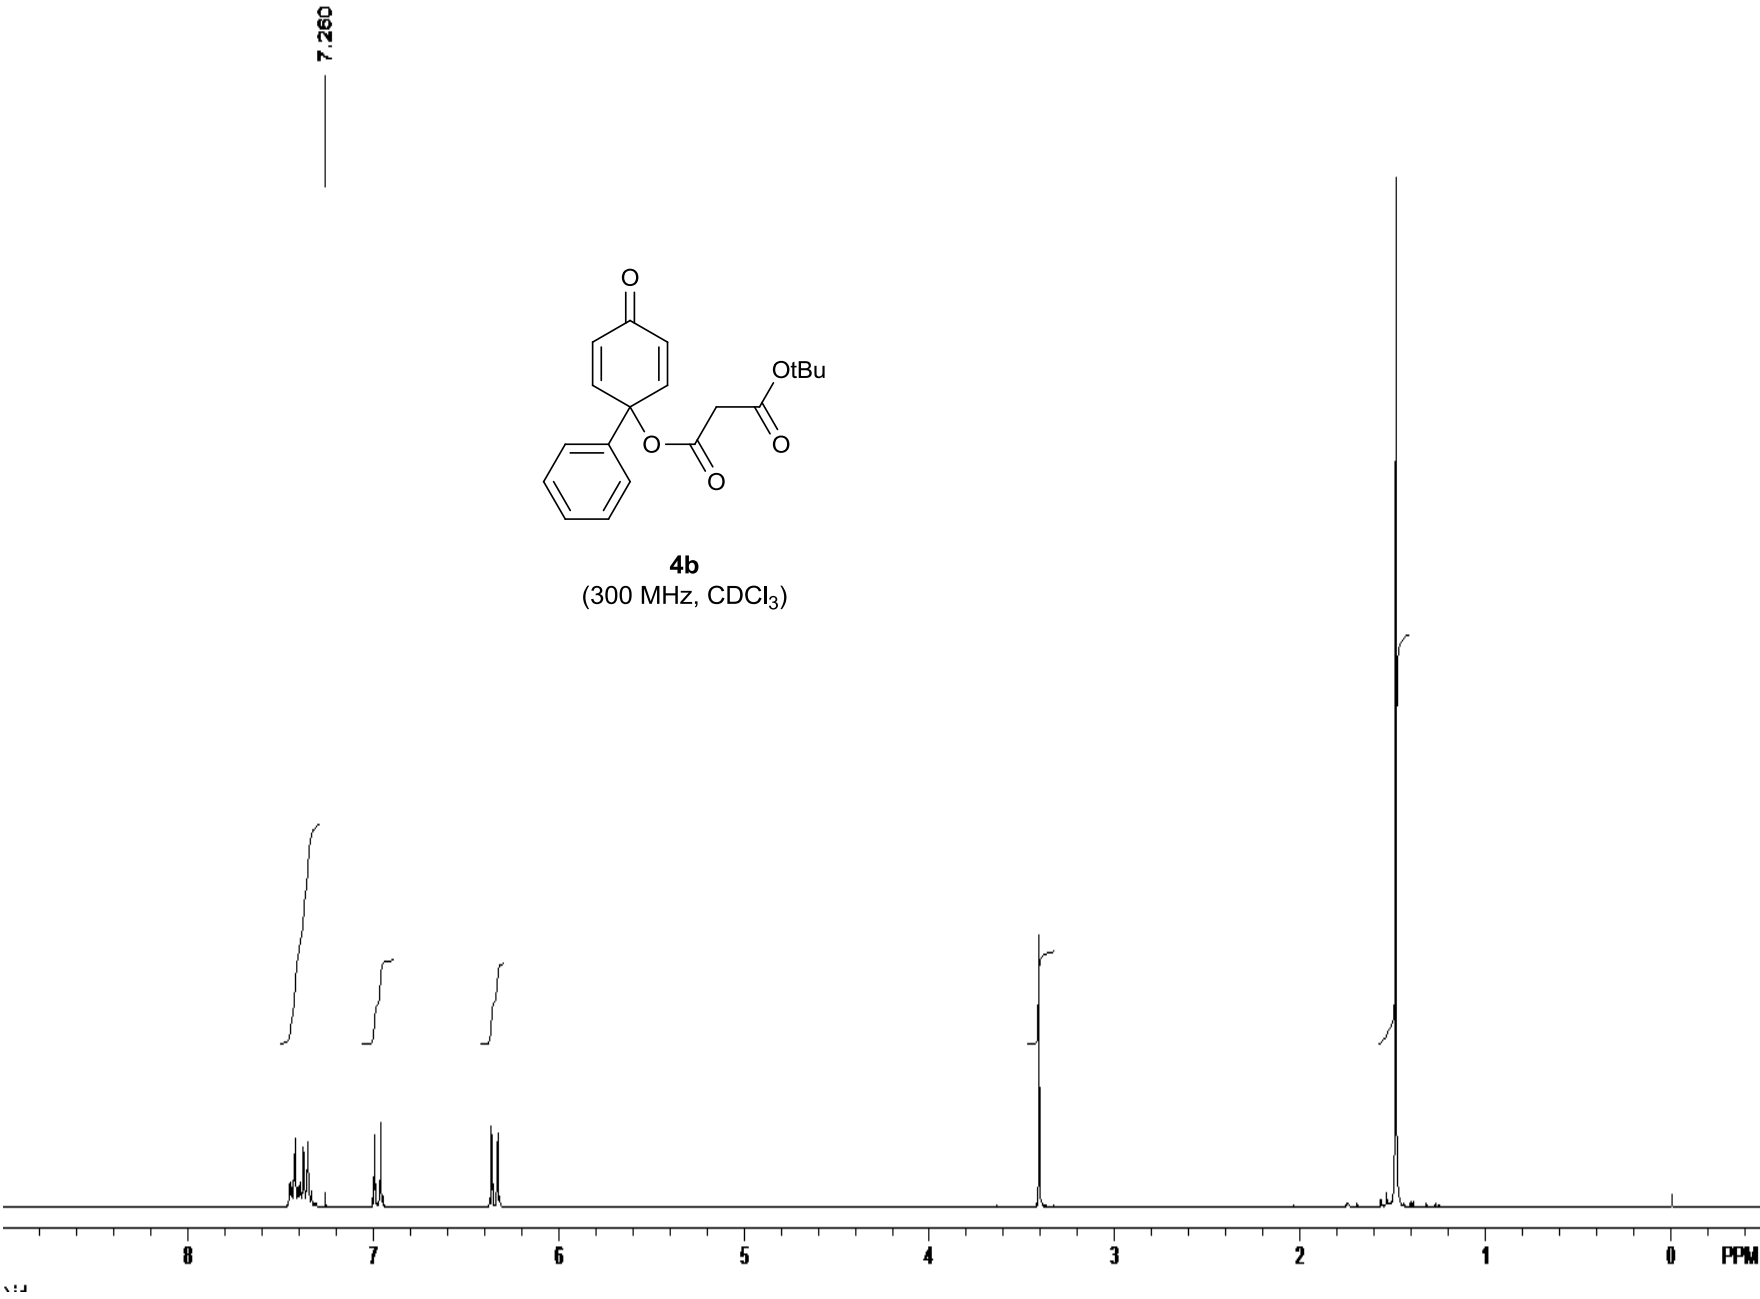

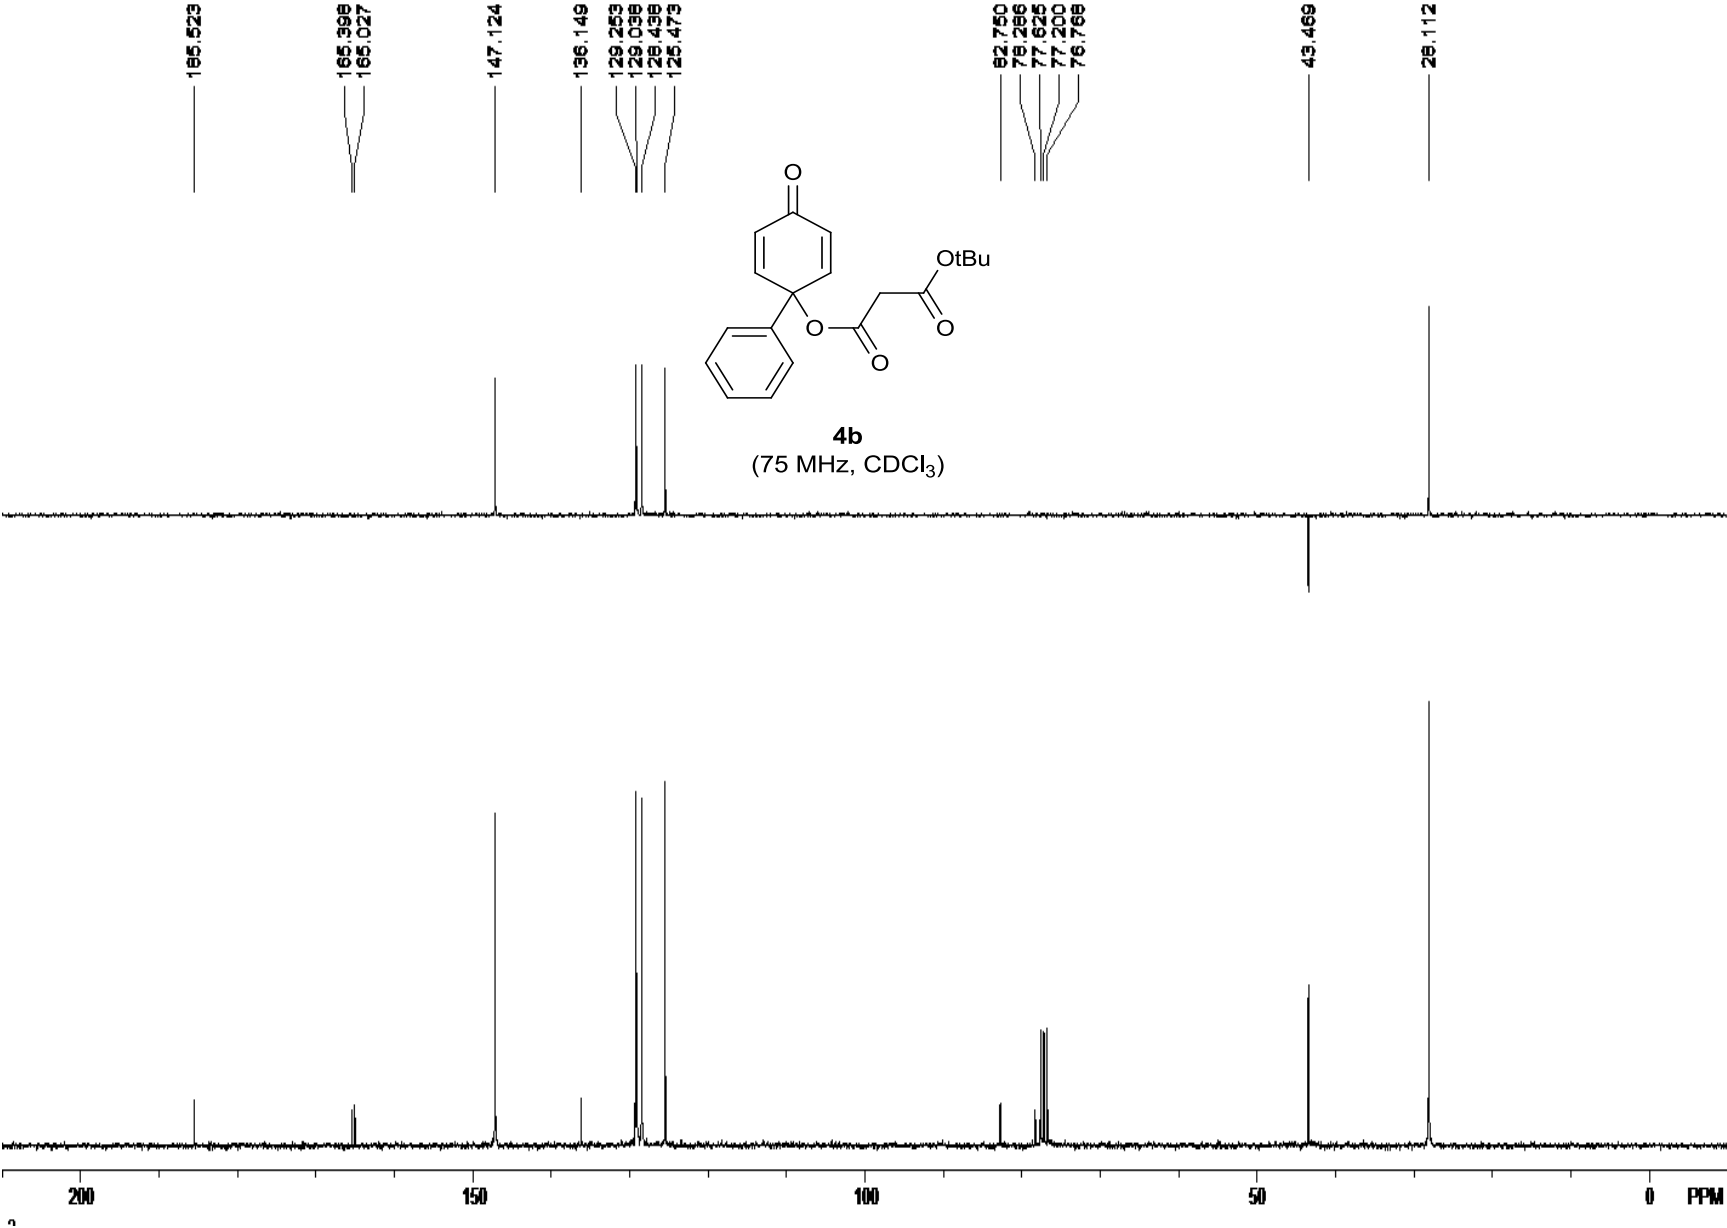

7.260

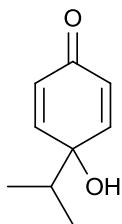

**1c**  
(300 MHz, CDCl<sub>3</sub>)

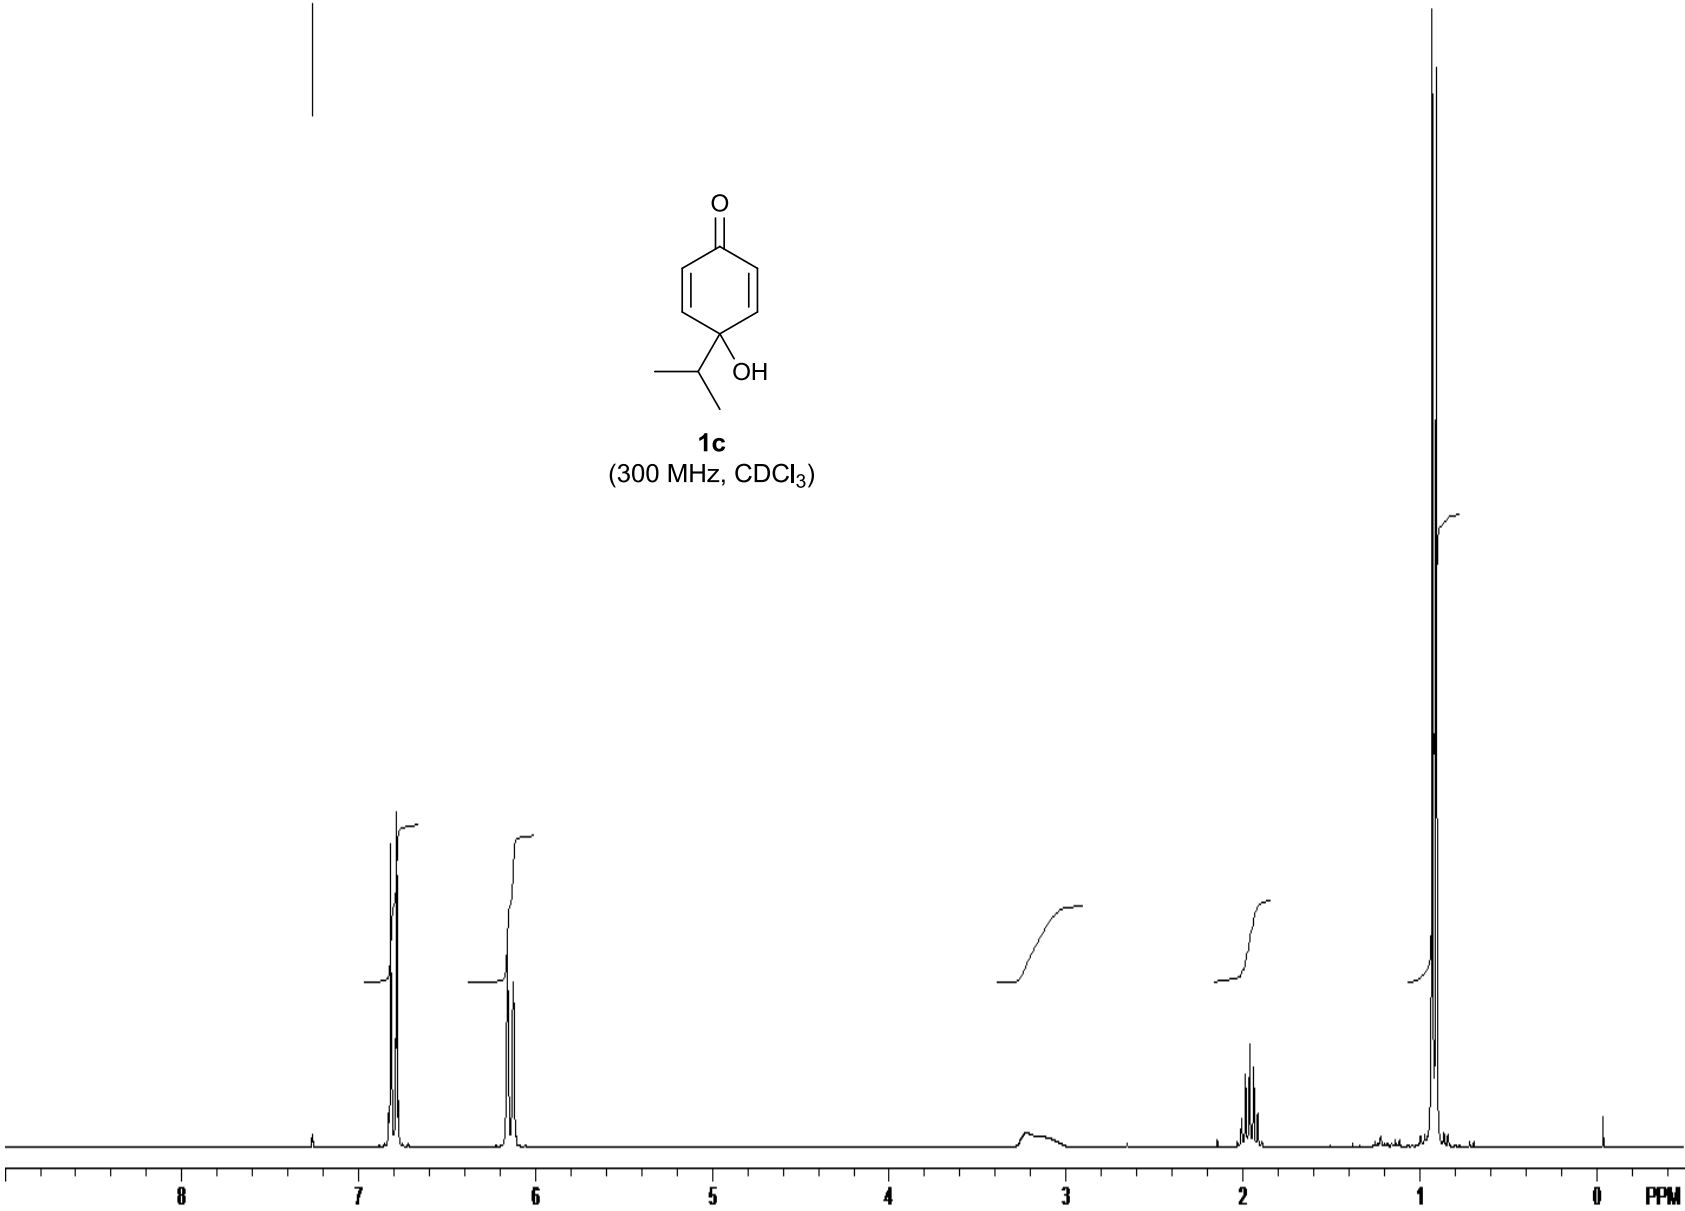

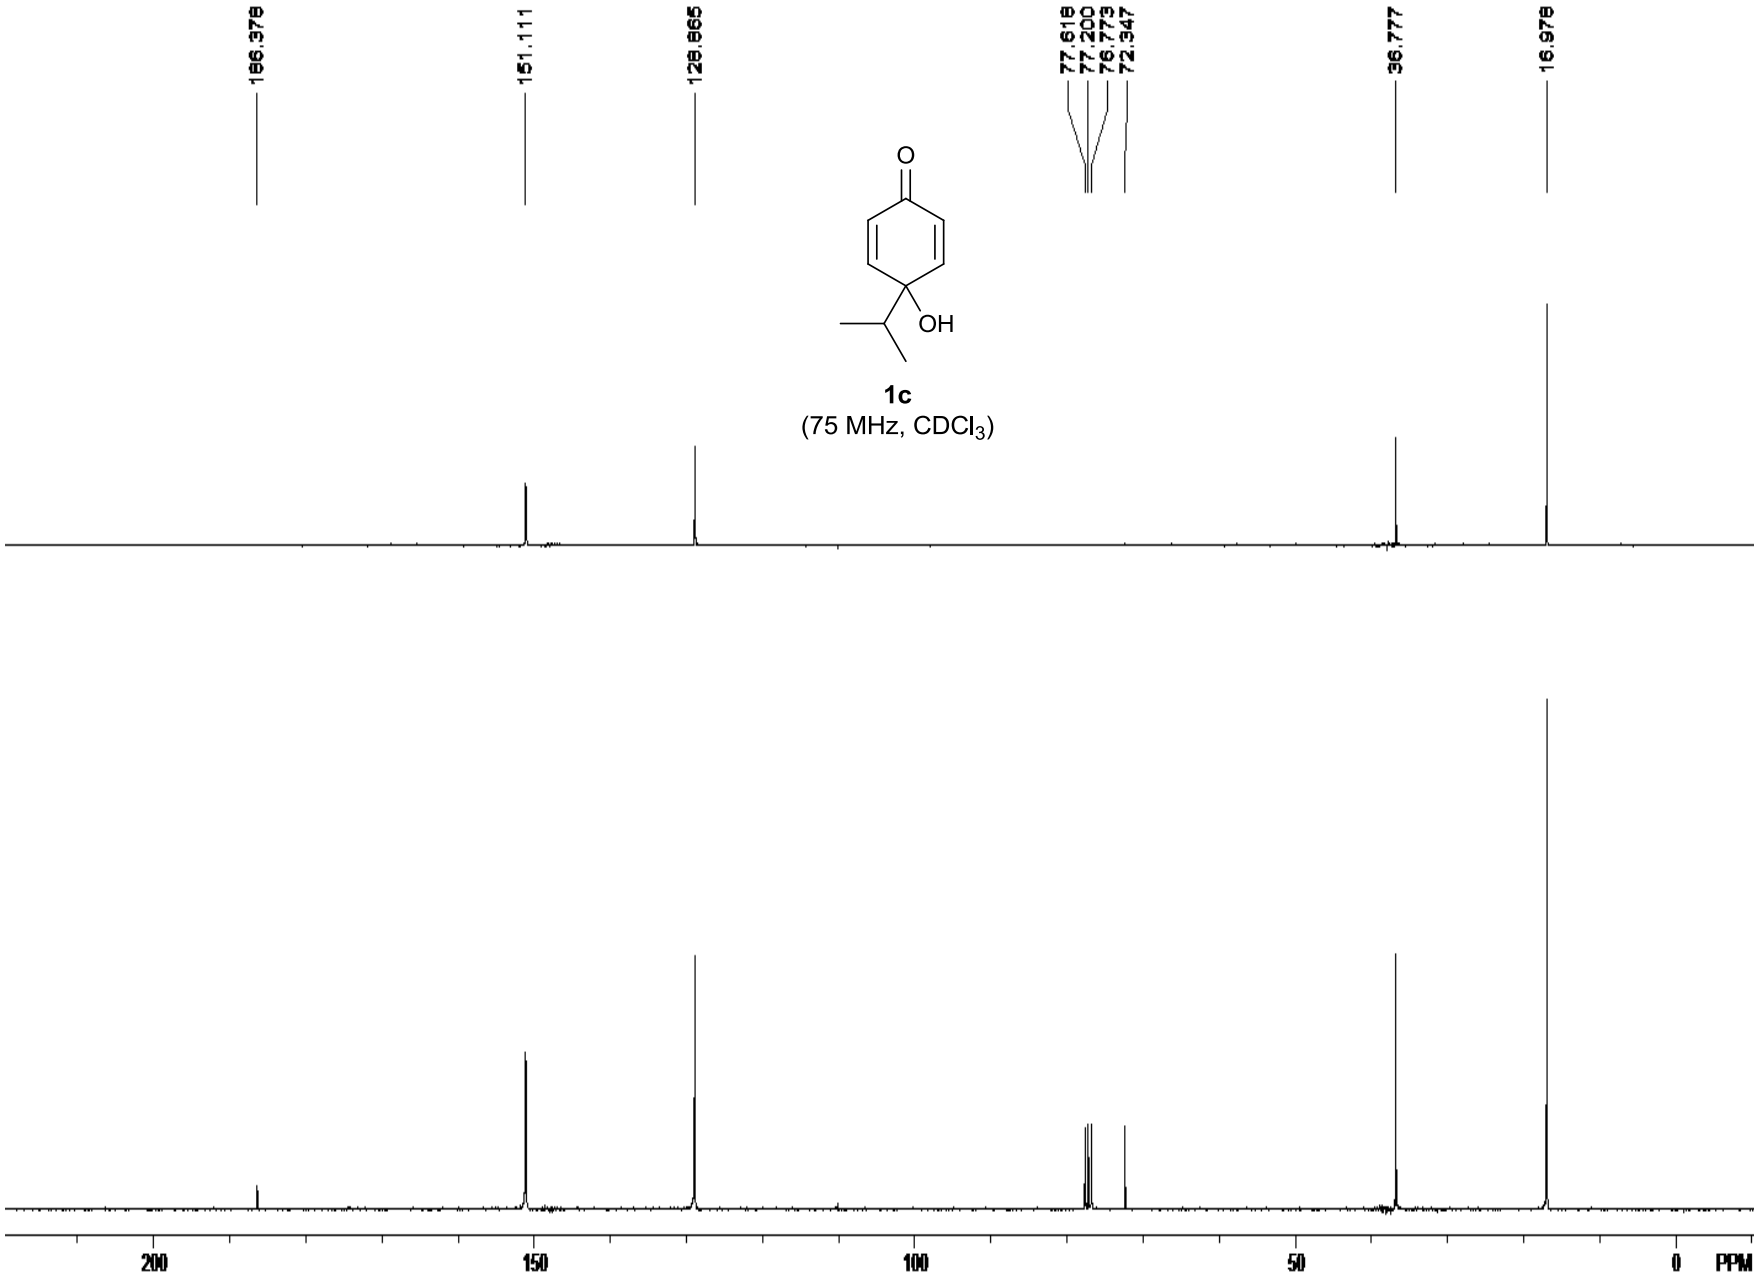

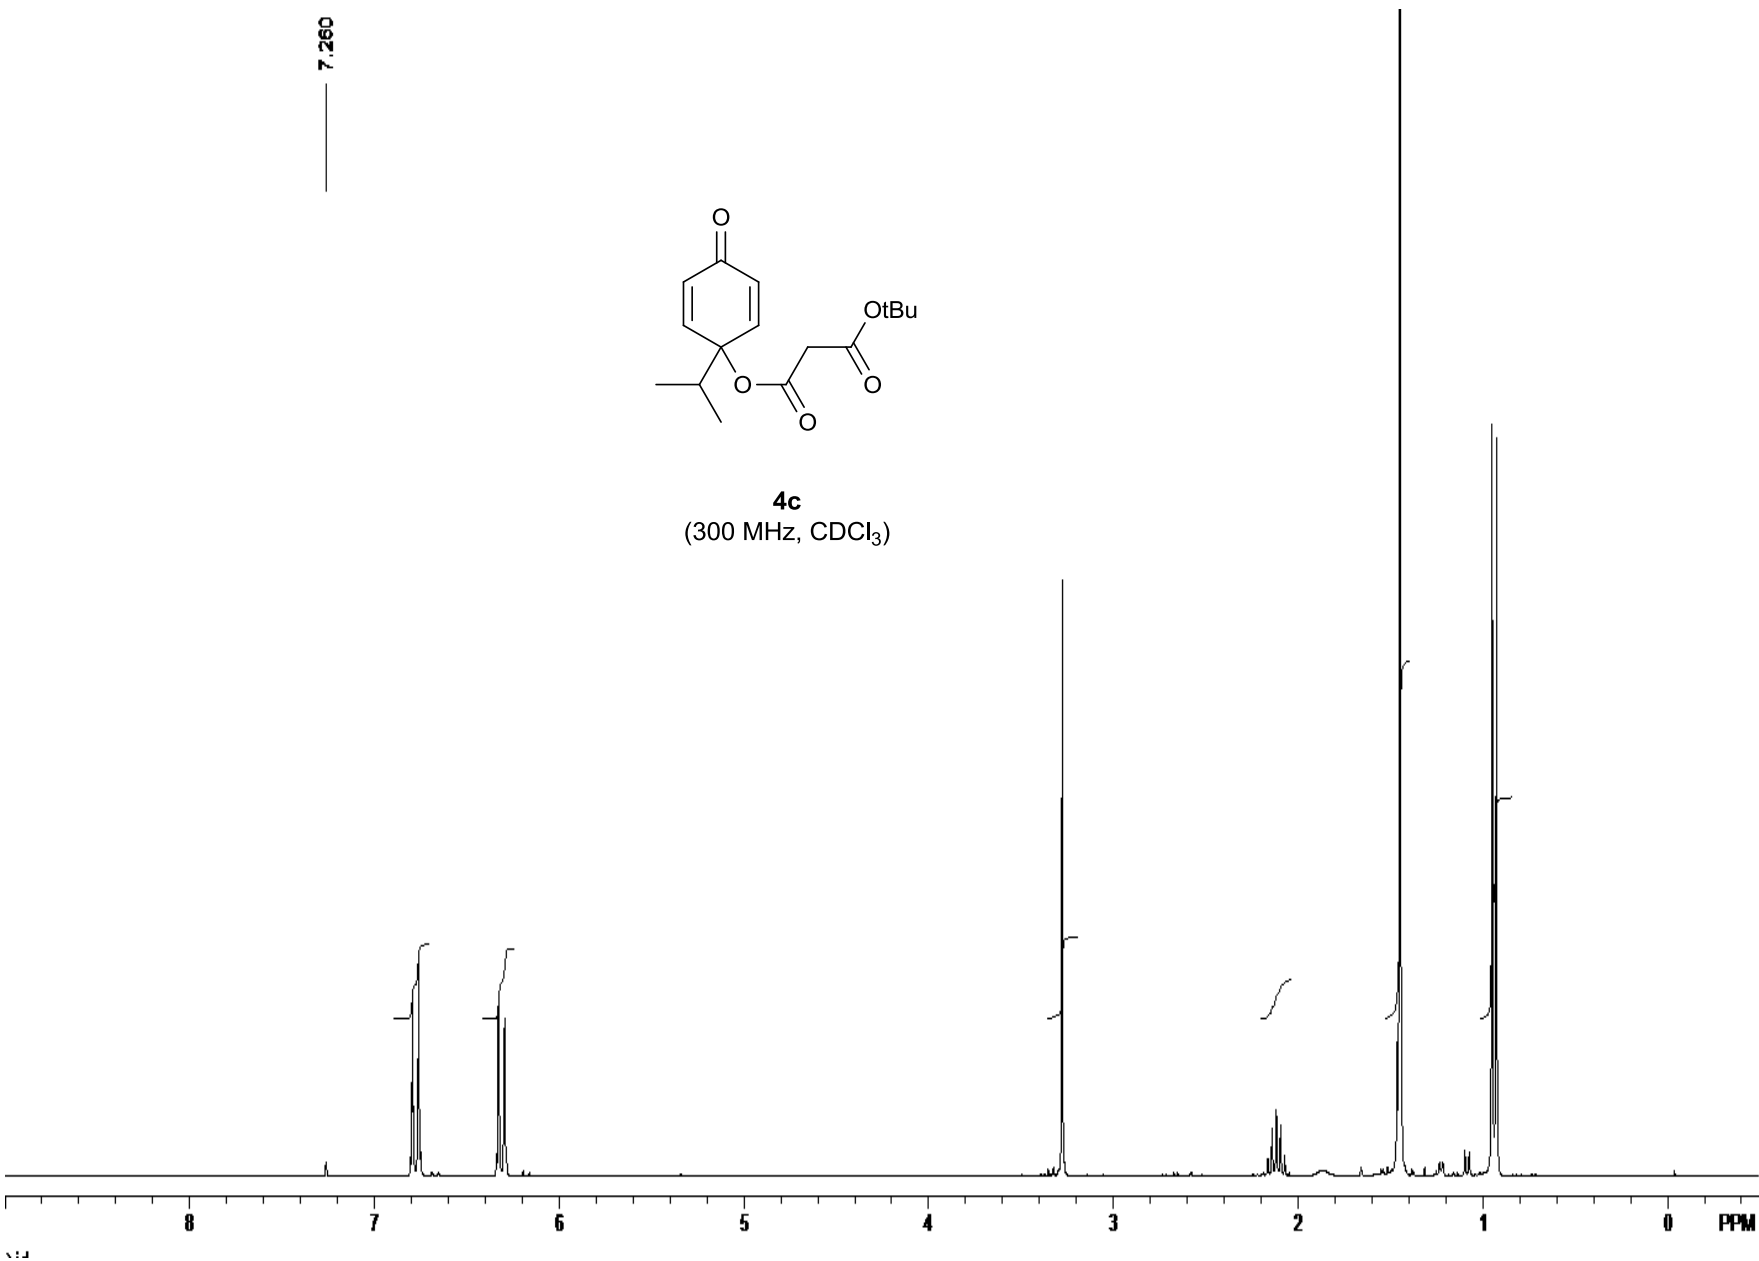

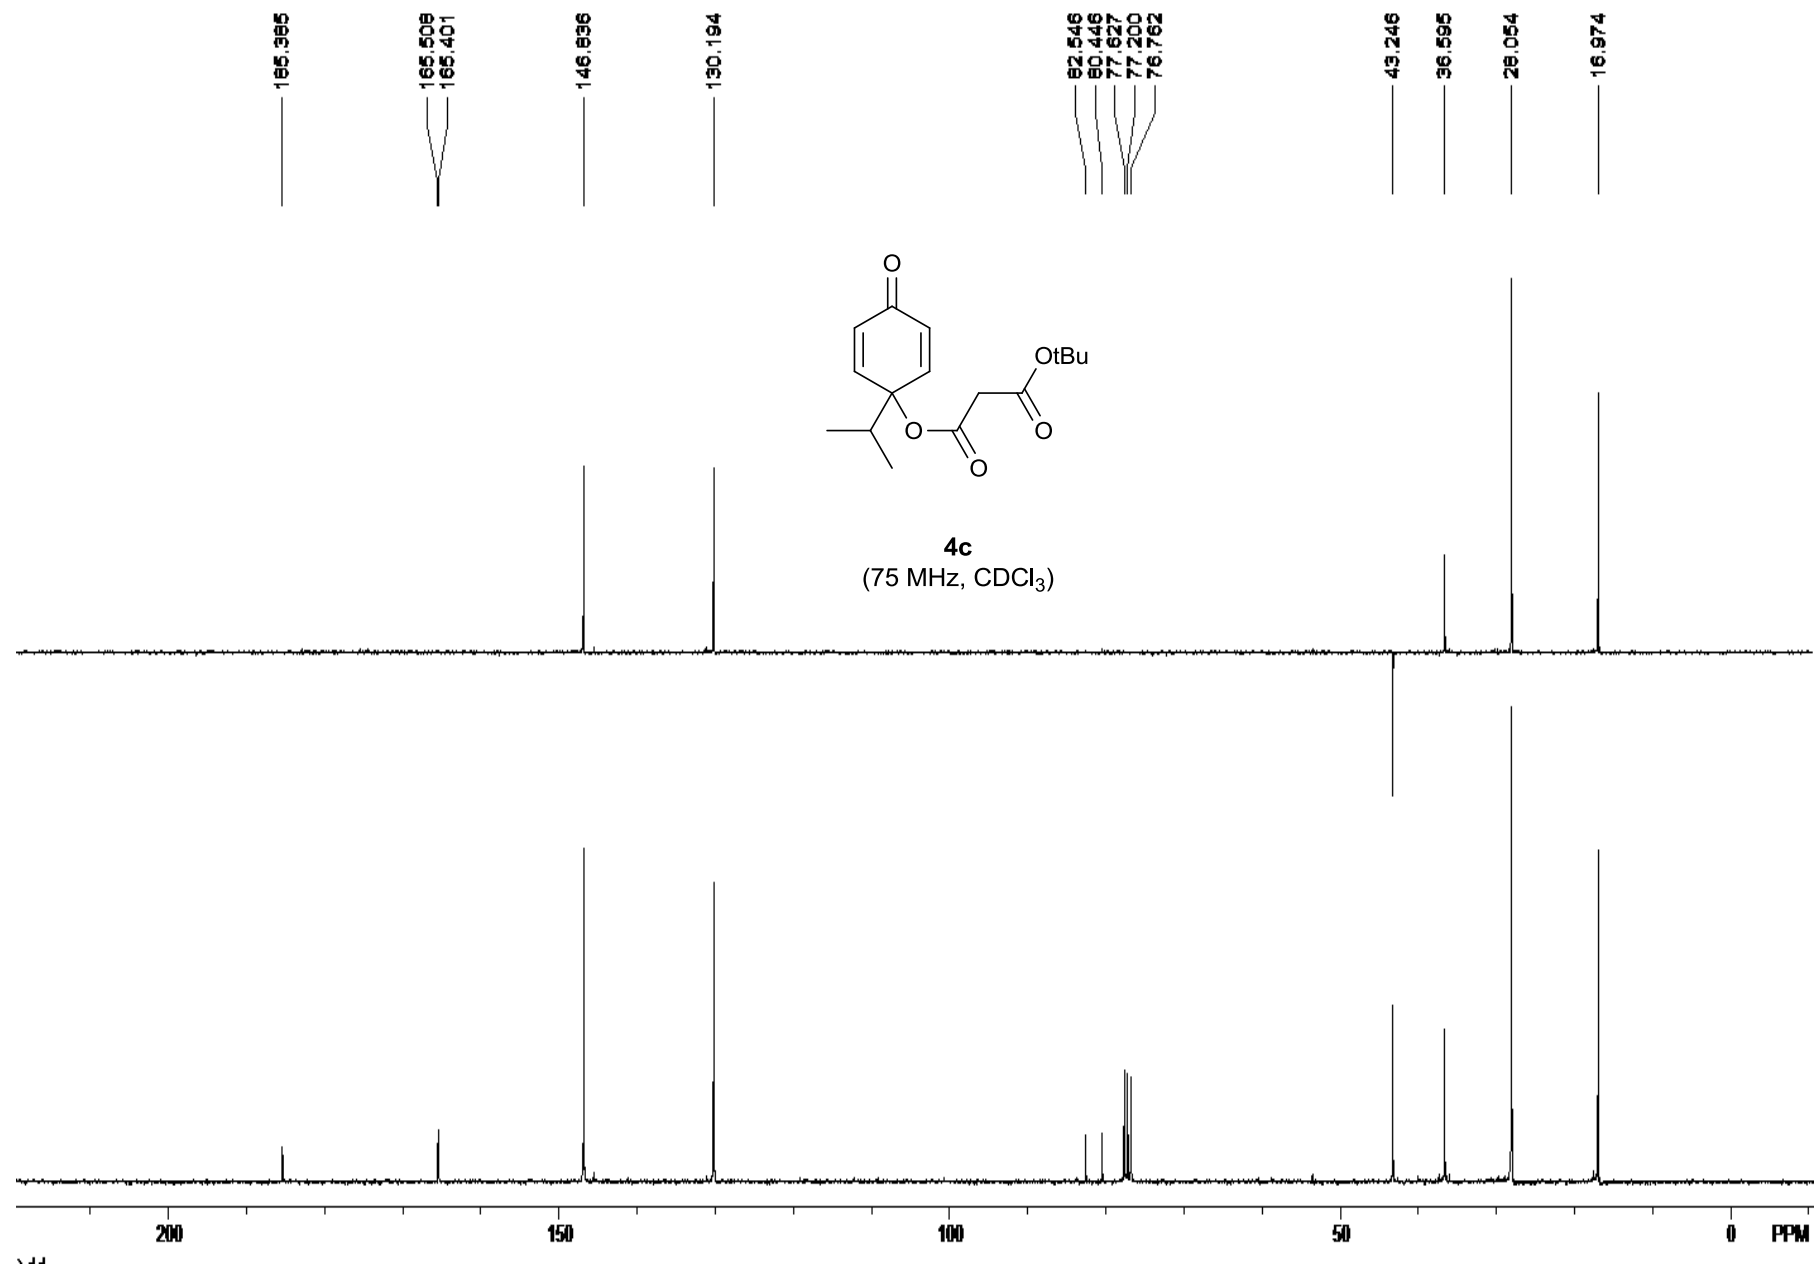



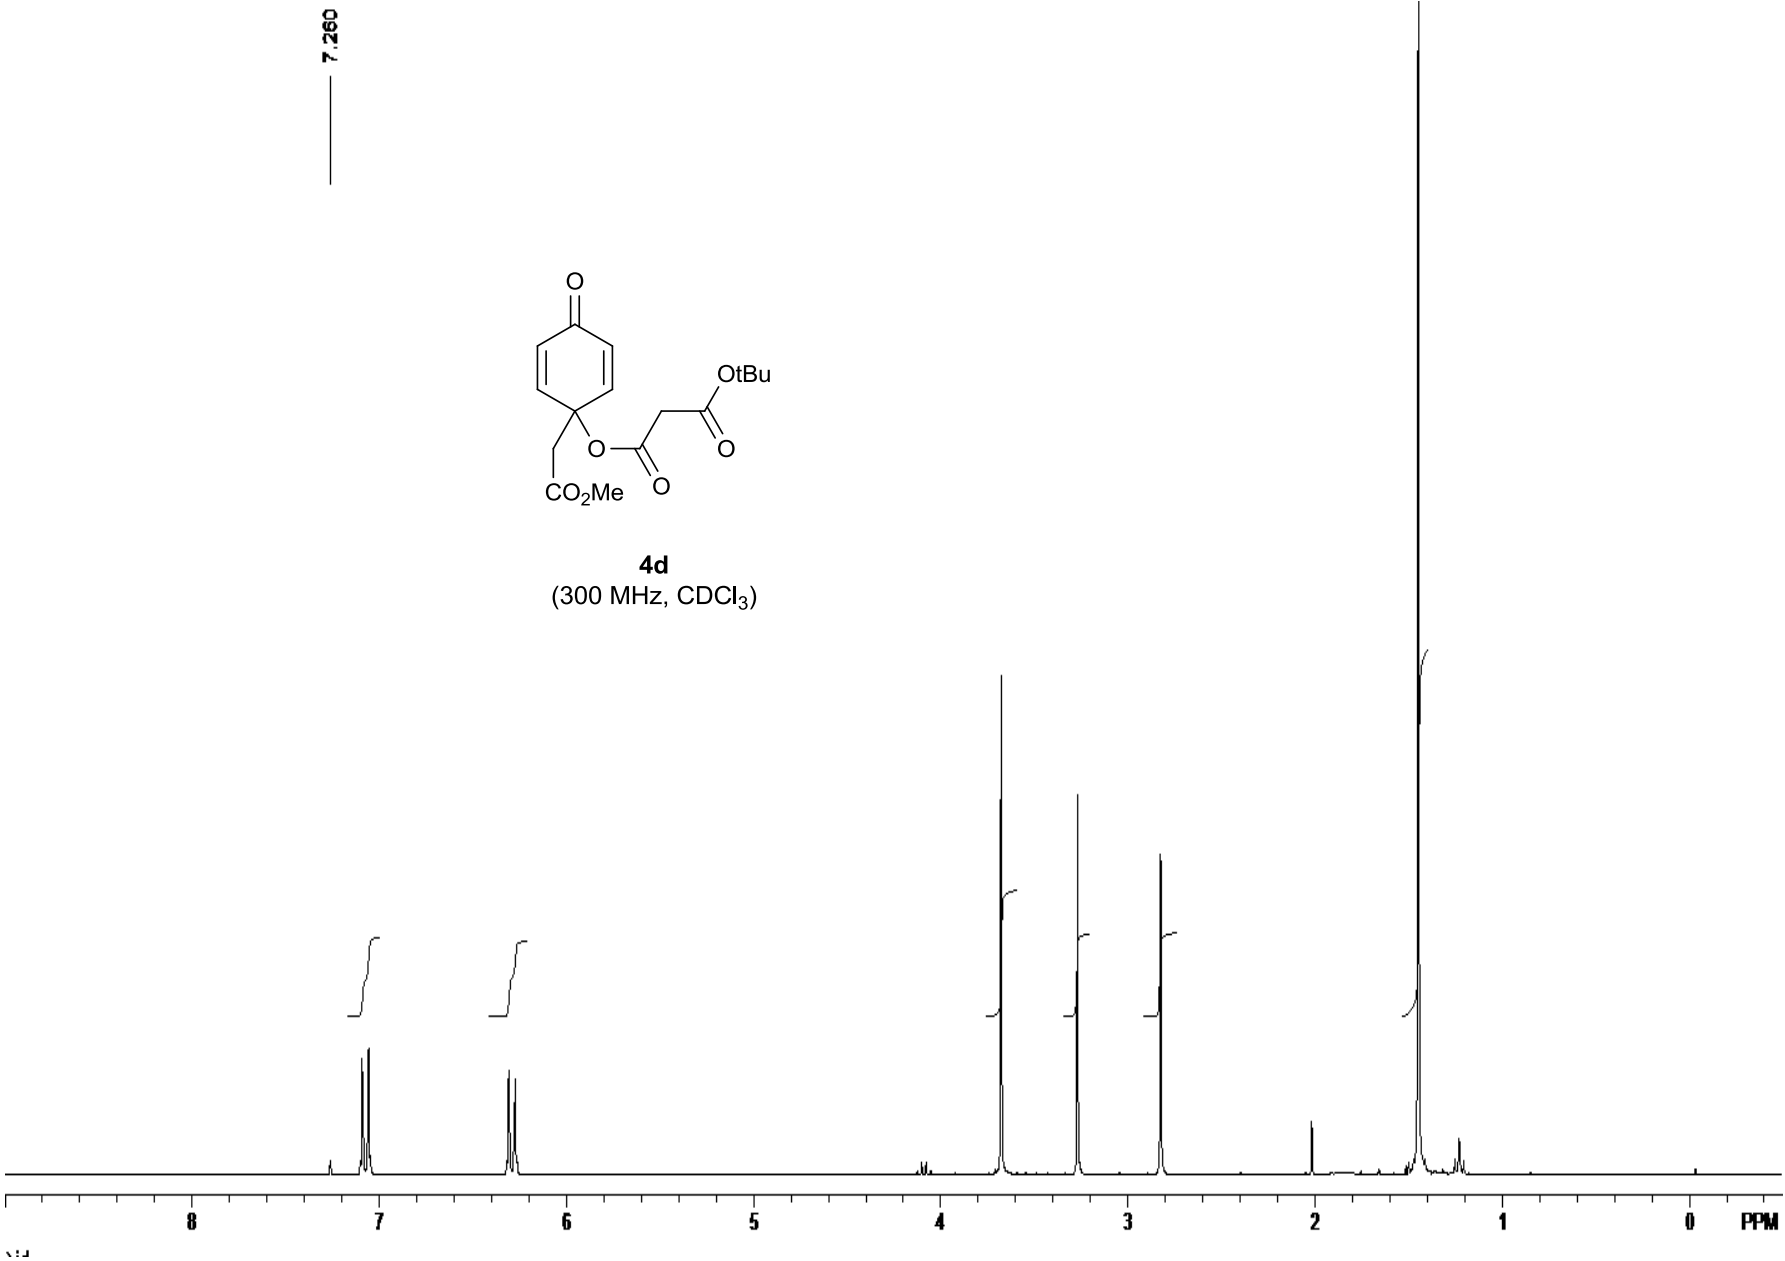

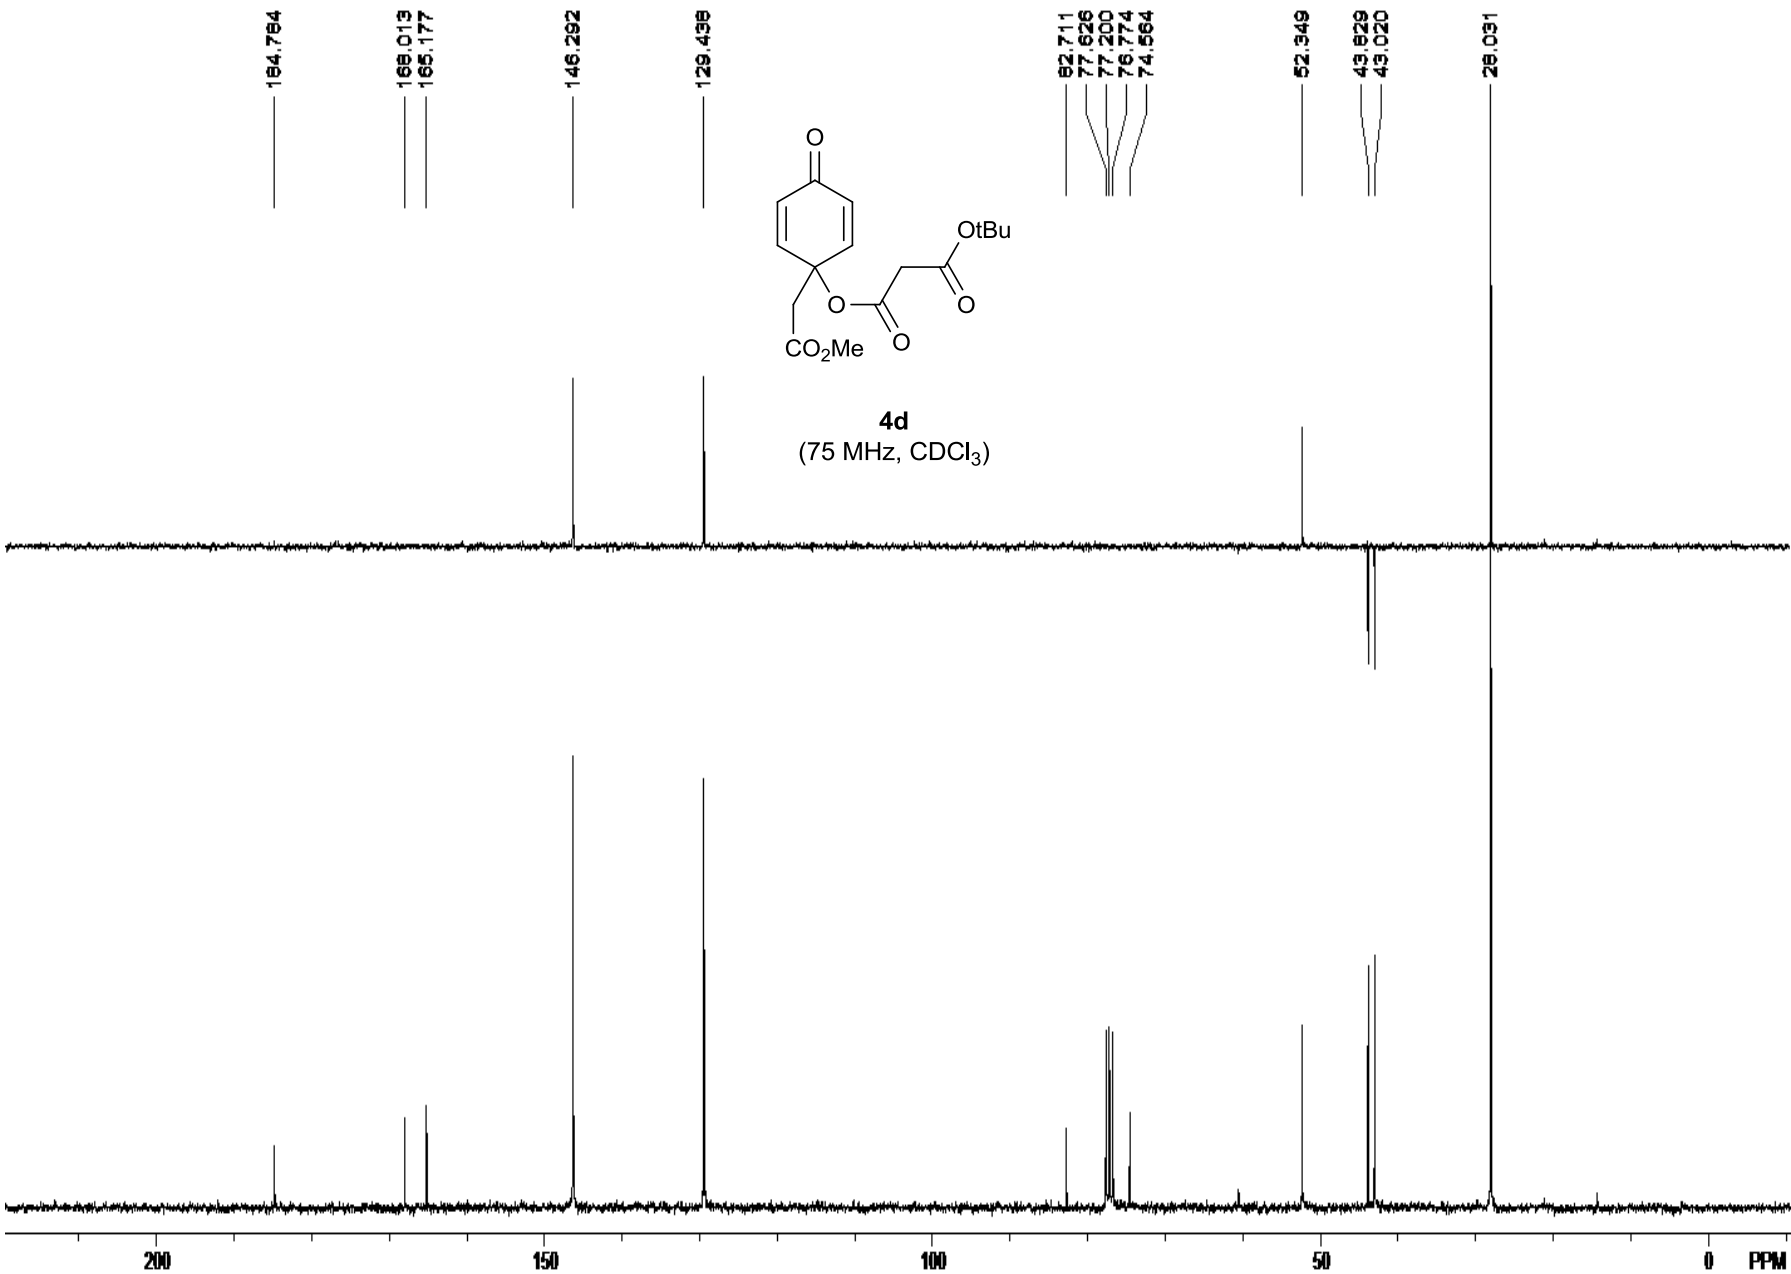

0.000

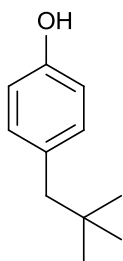

**S2**  
300 MHz, CDCl<sub>3</sub>)

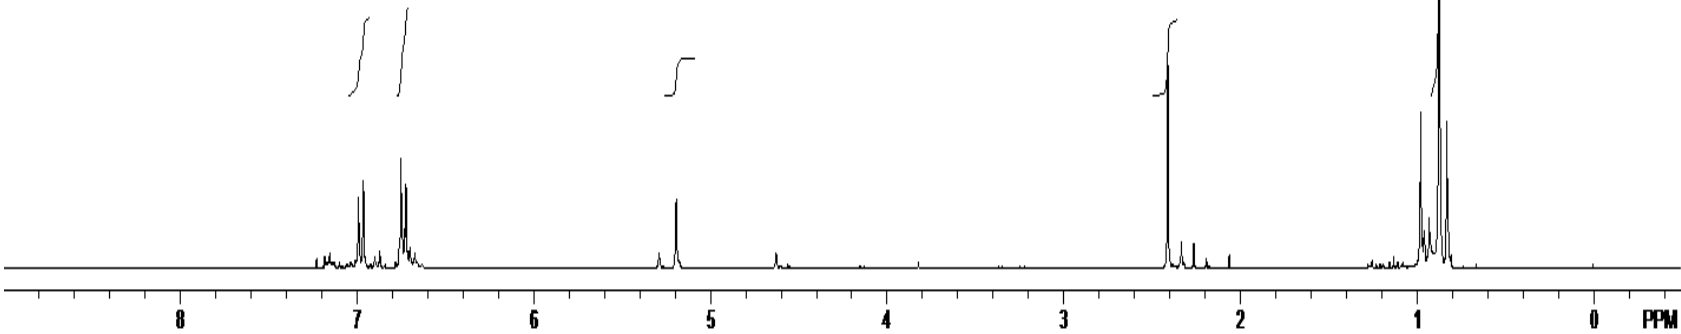

7.260

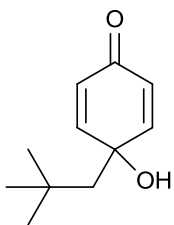

**1e**  
(300 MHz, CDCl<sub>3</sub>)

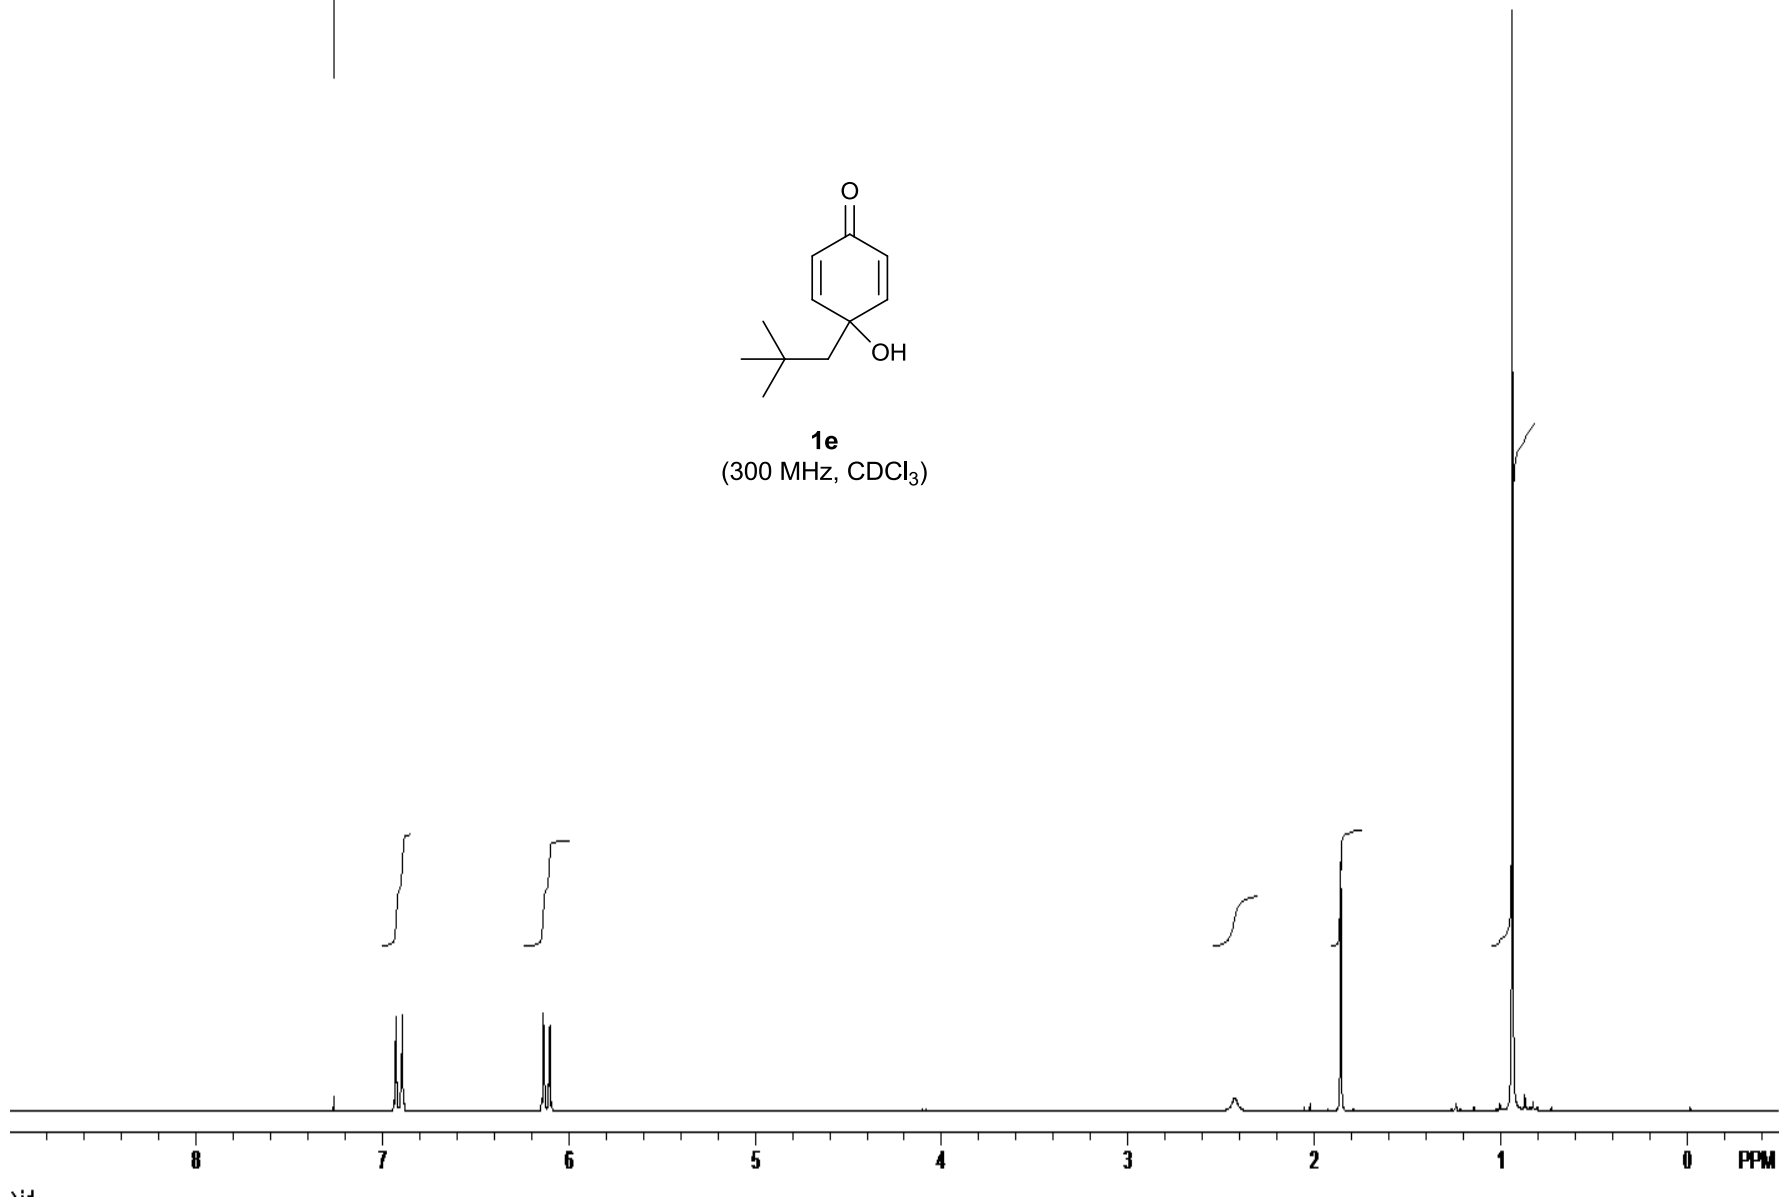

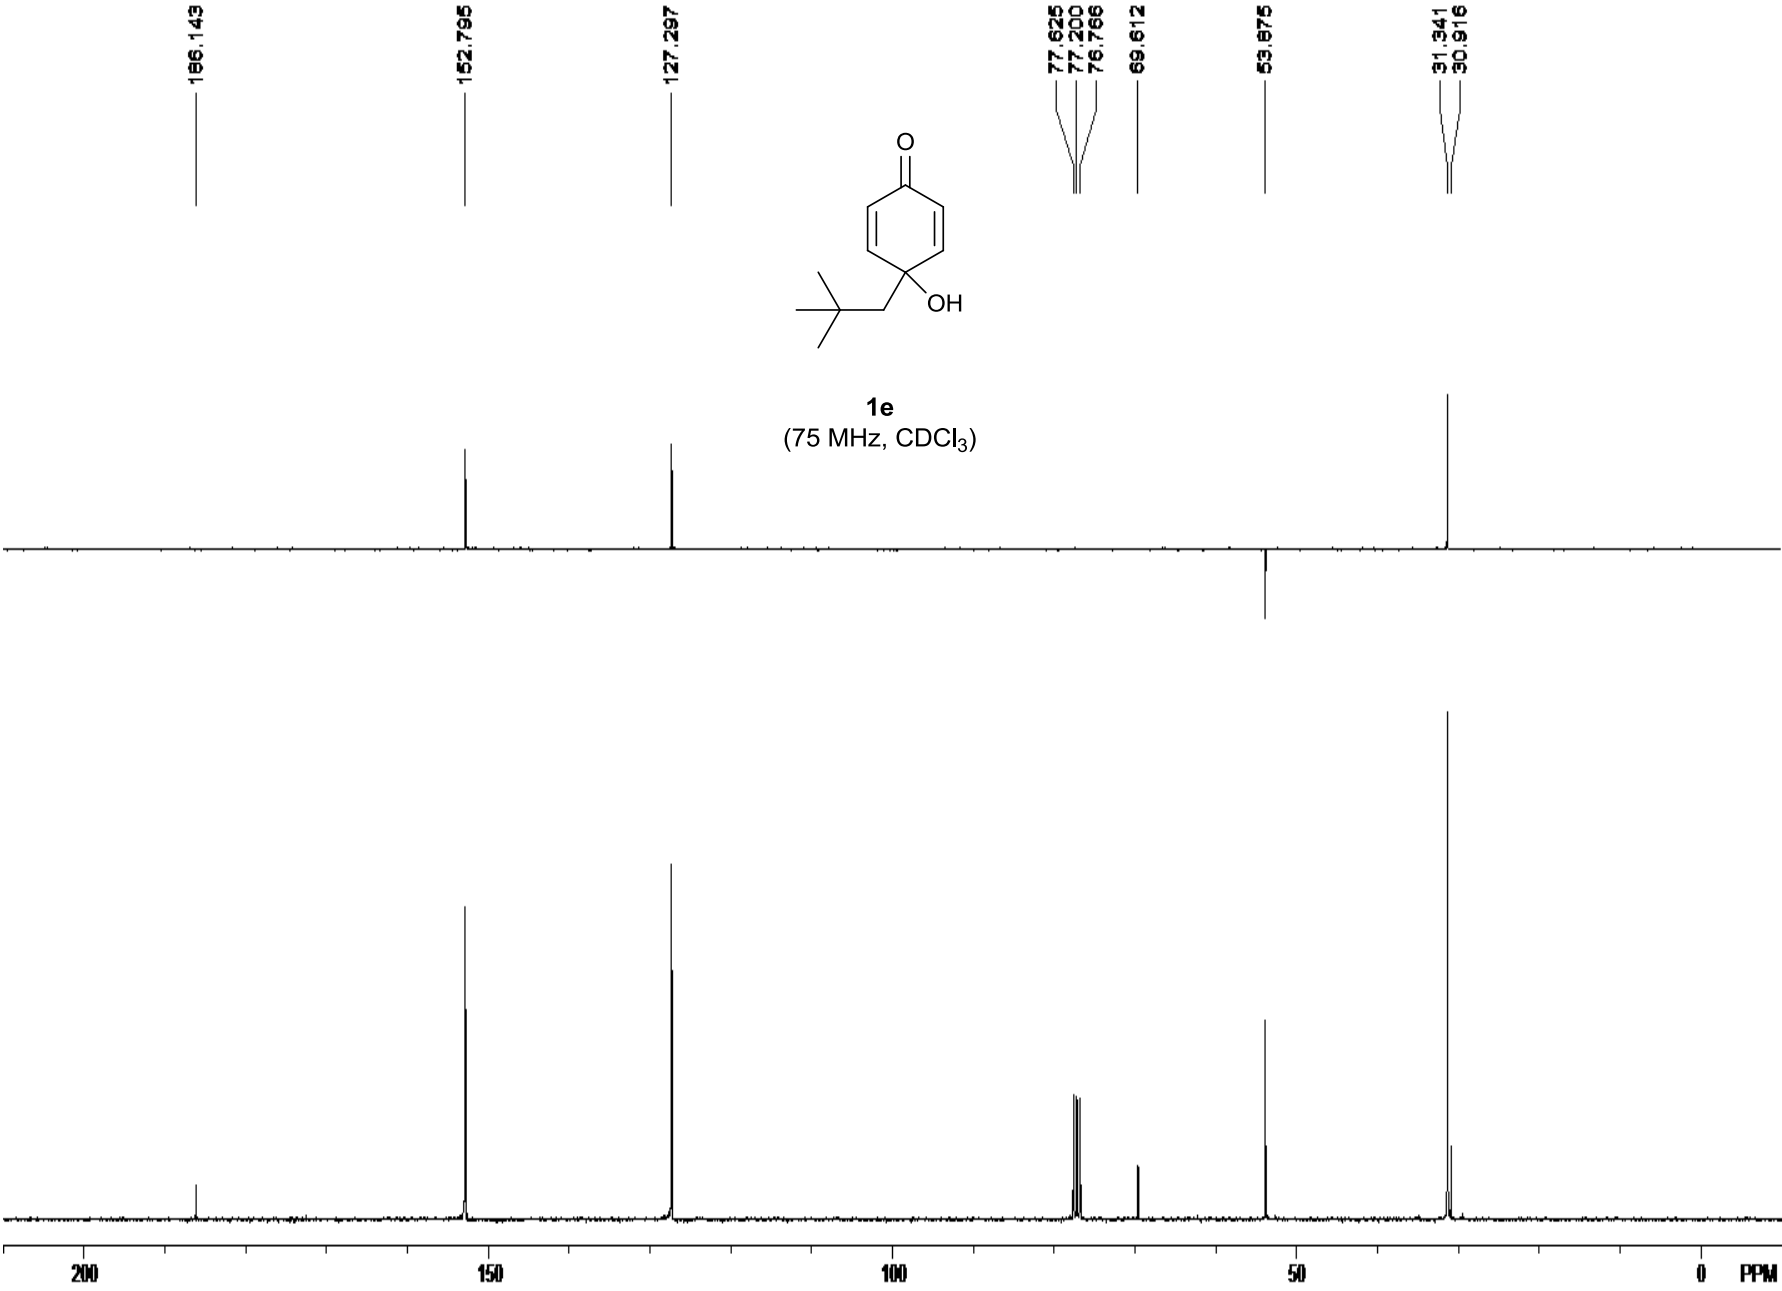

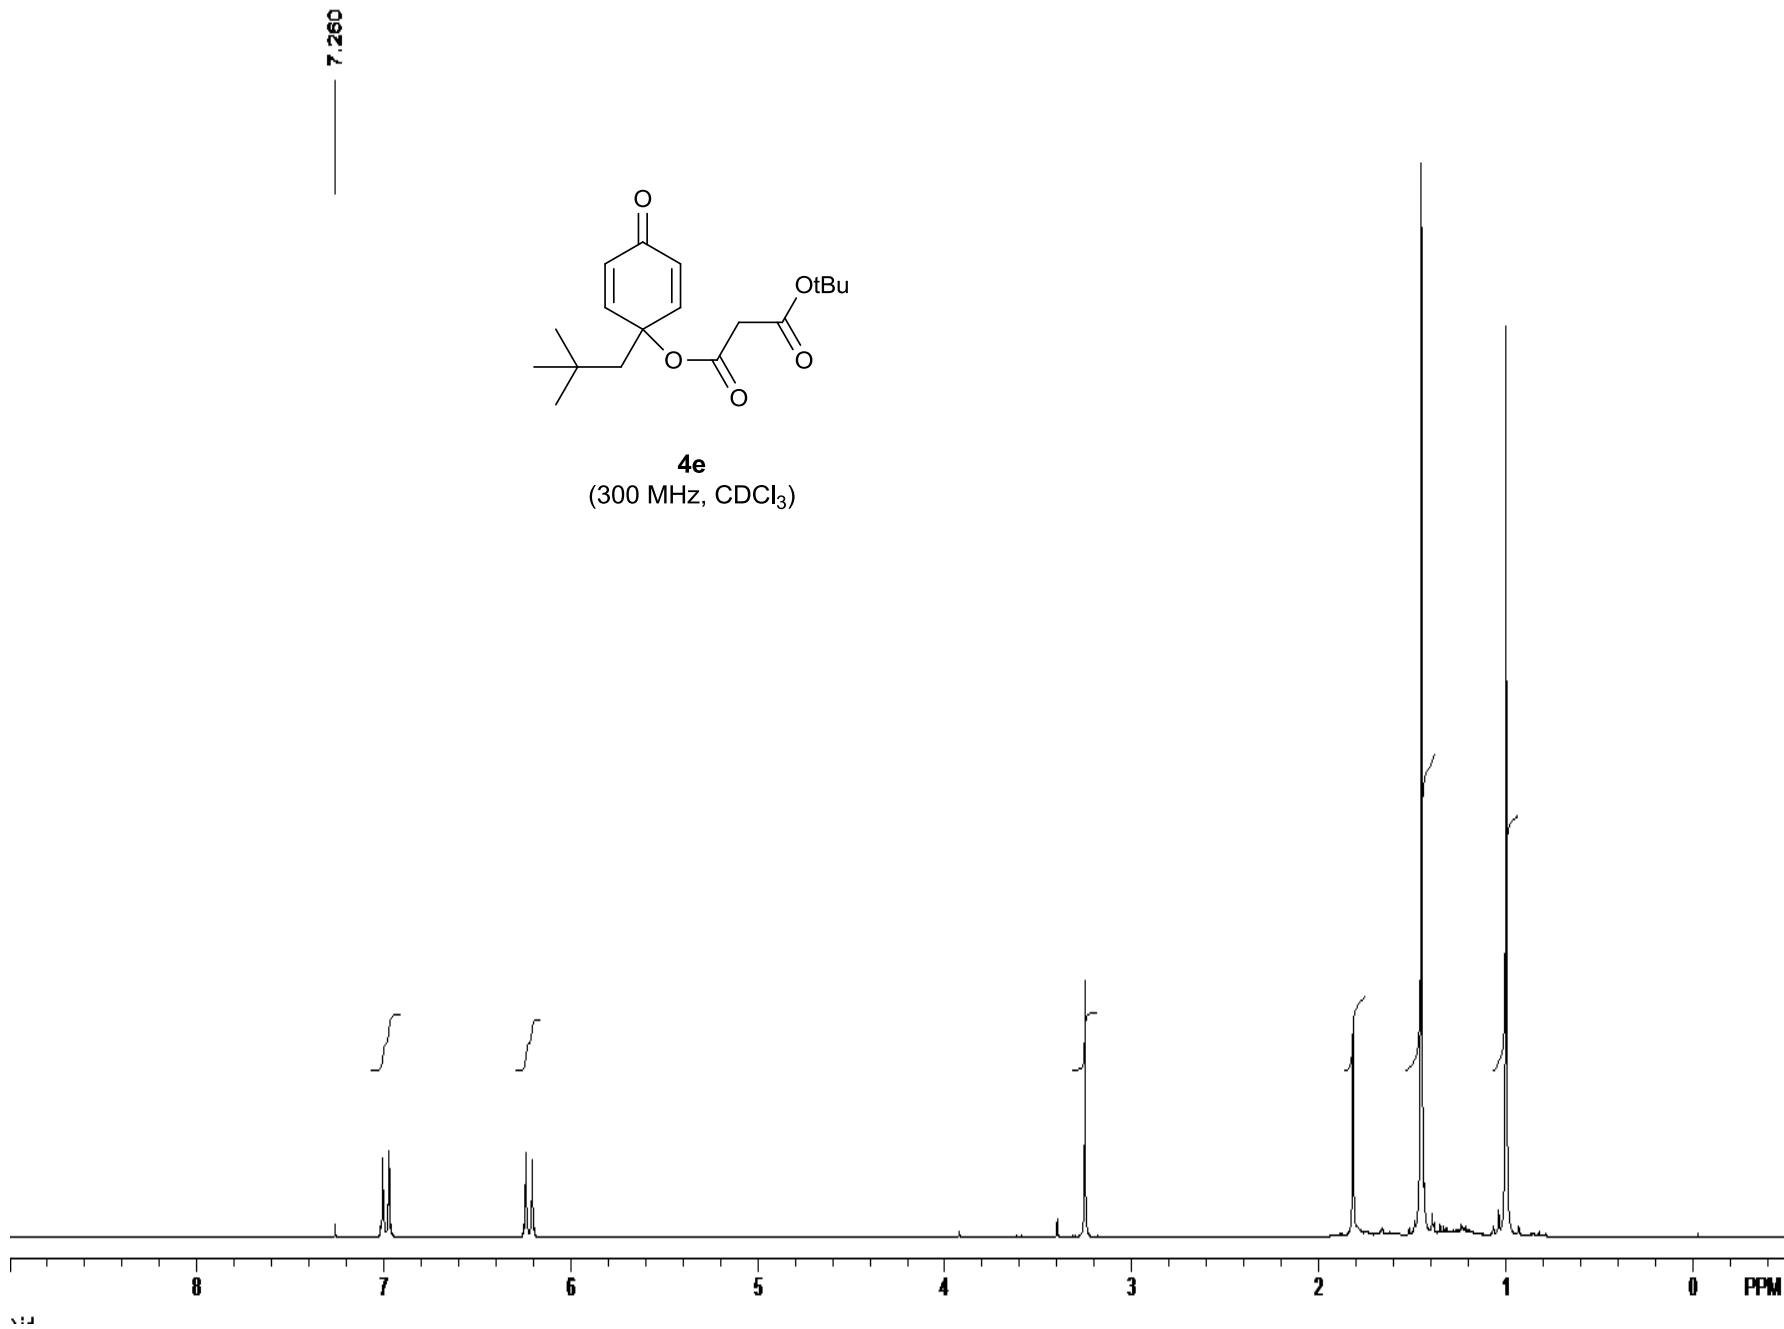

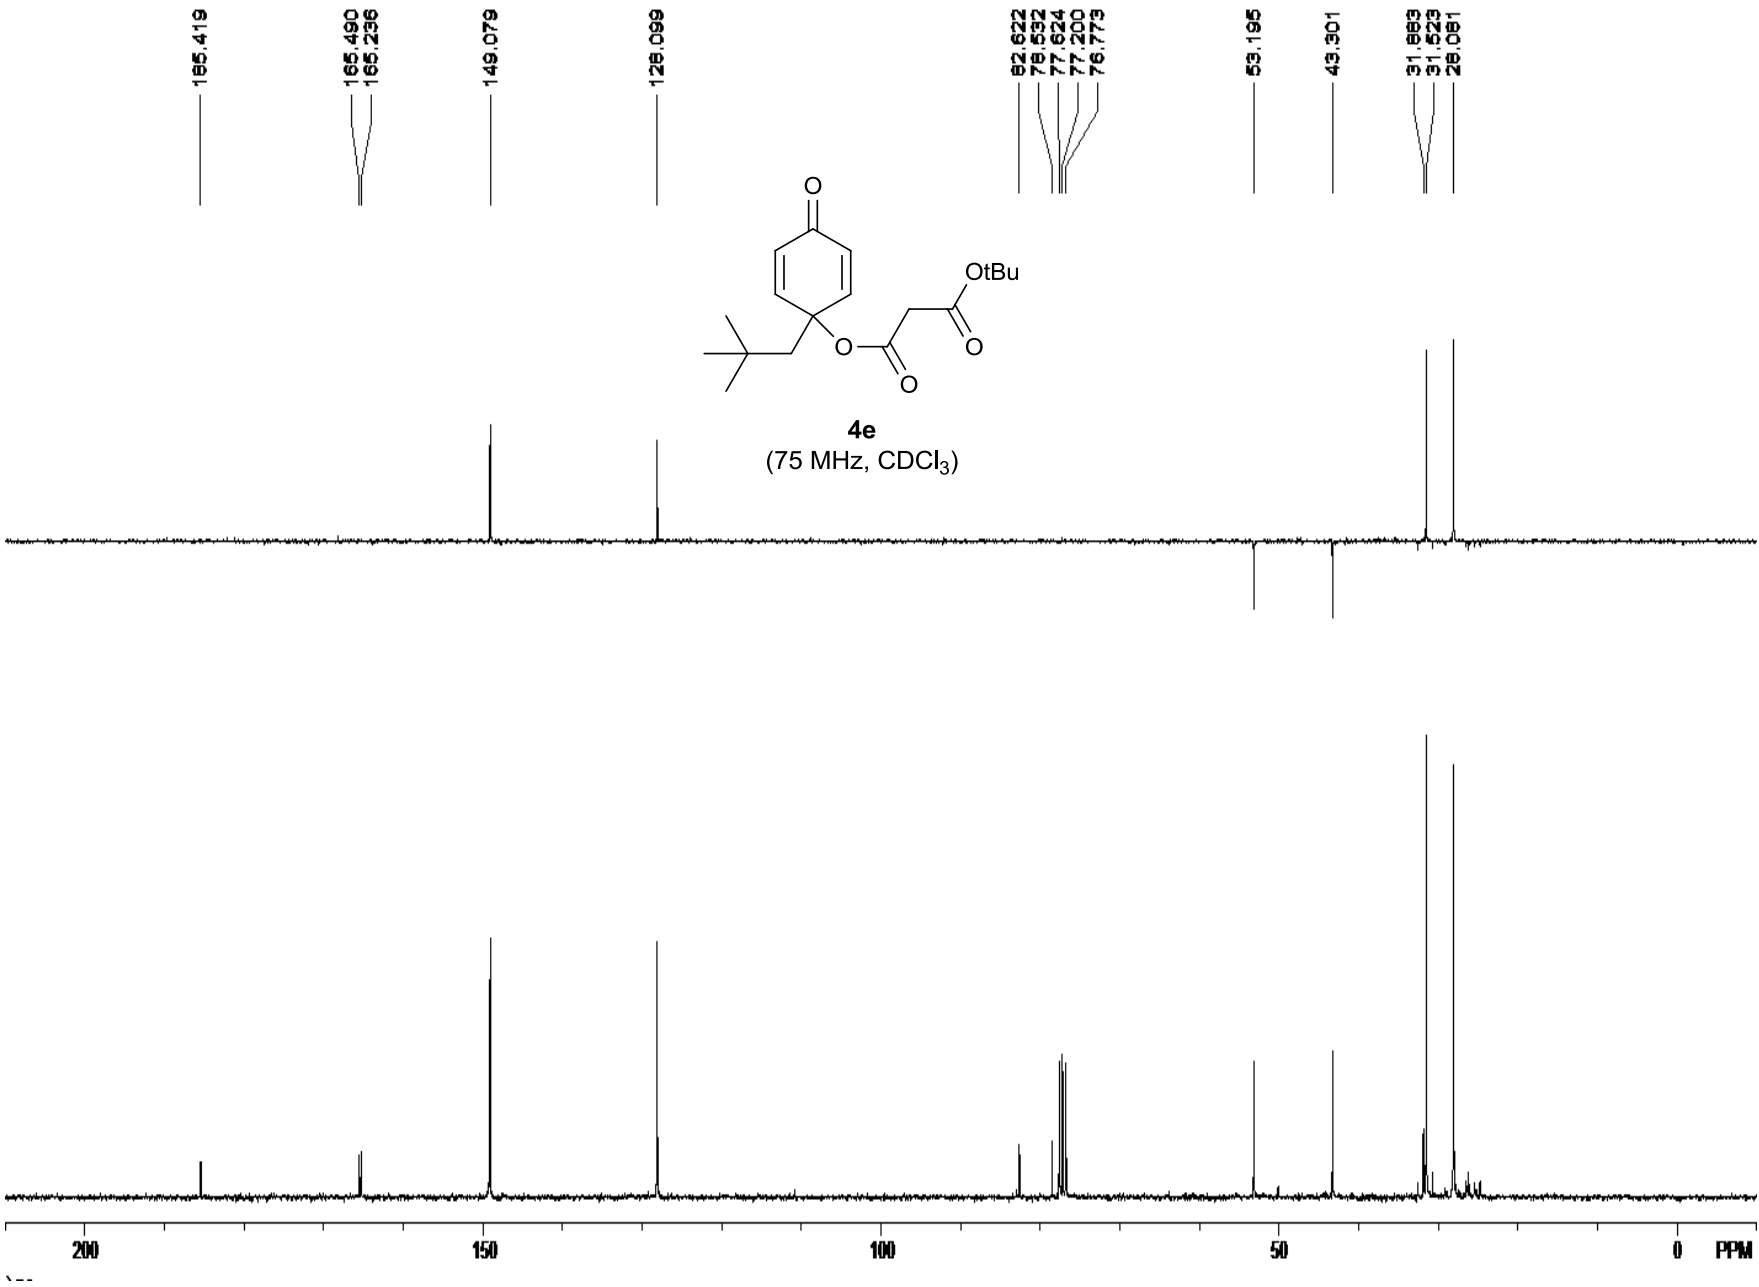

300.17 MHz  
cdcl3

7.26

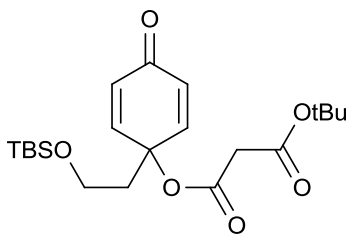

**4f**  
(300 MHz, CDCl<sub>3</sub>)

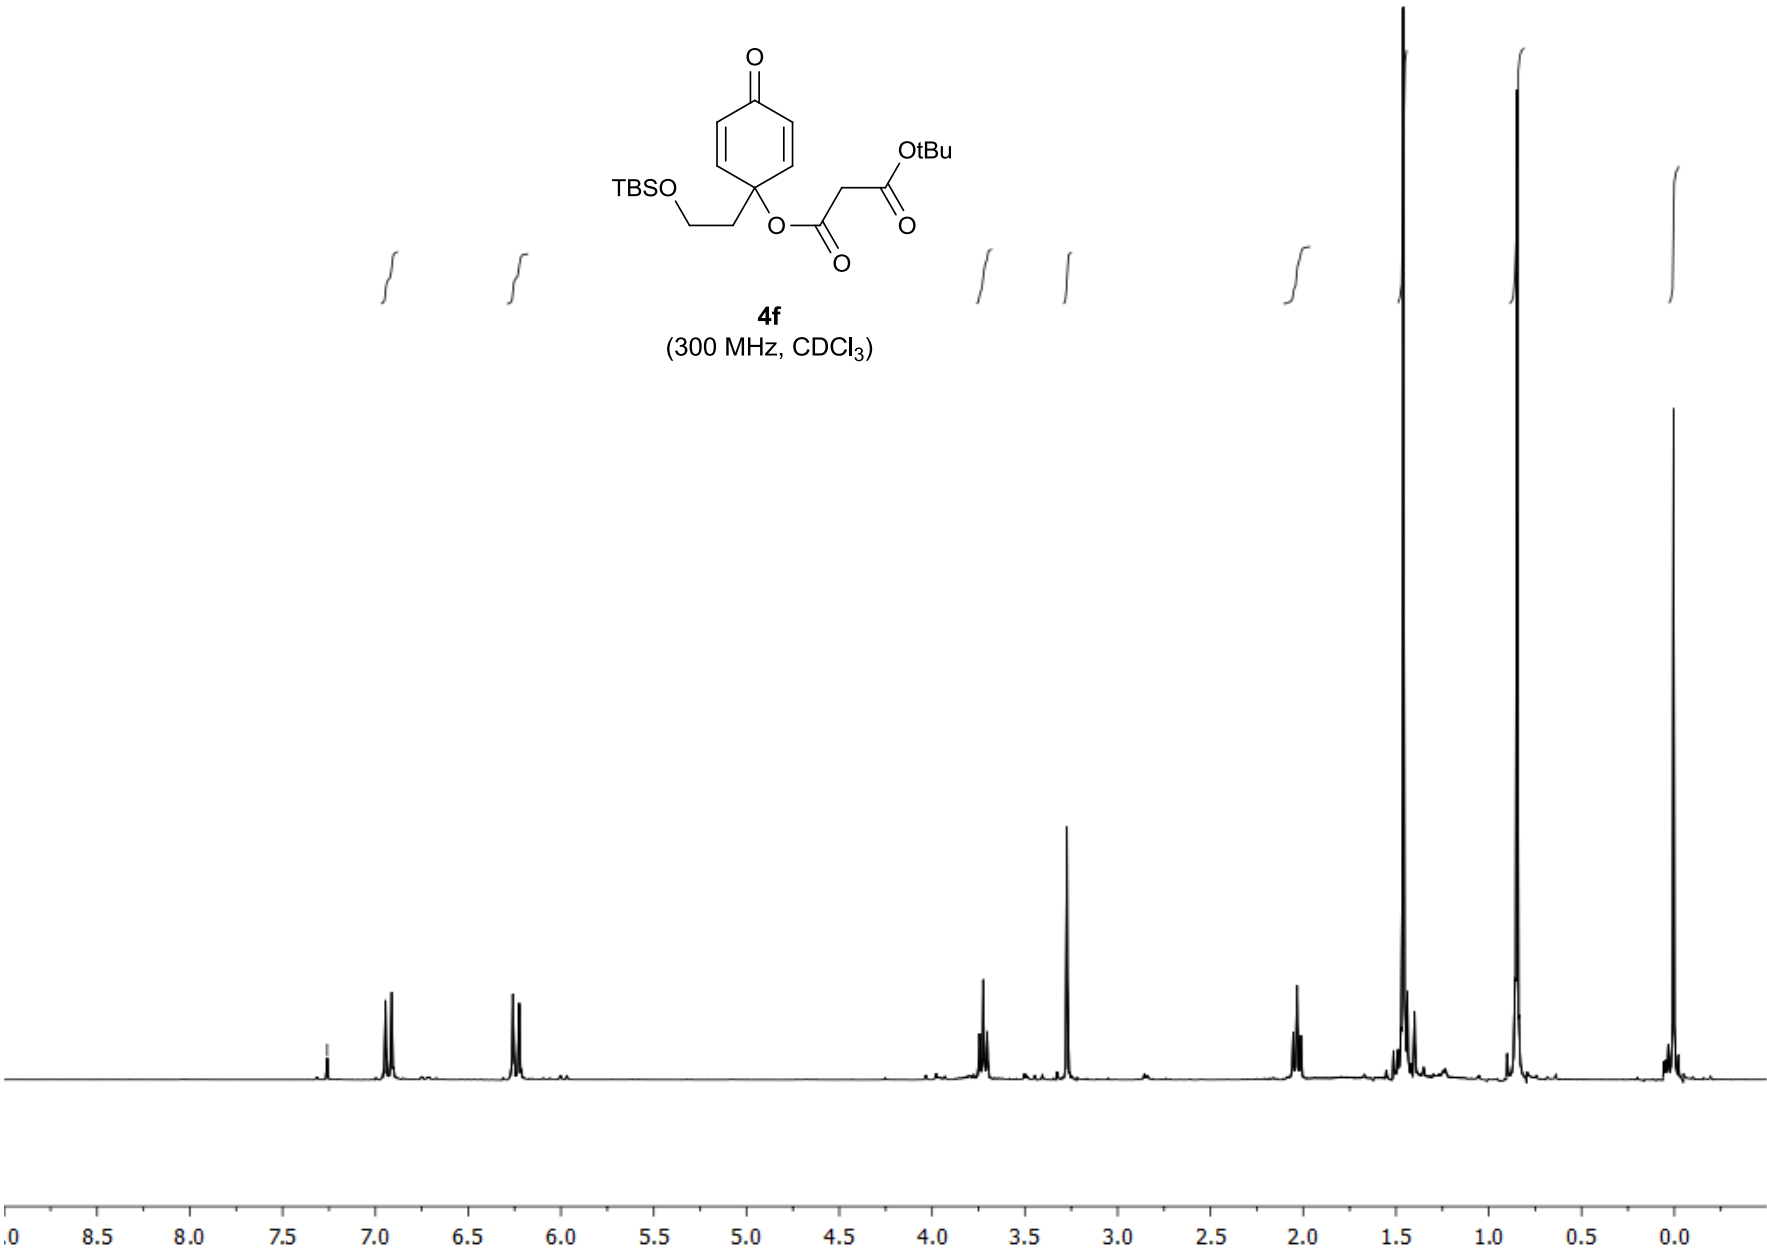



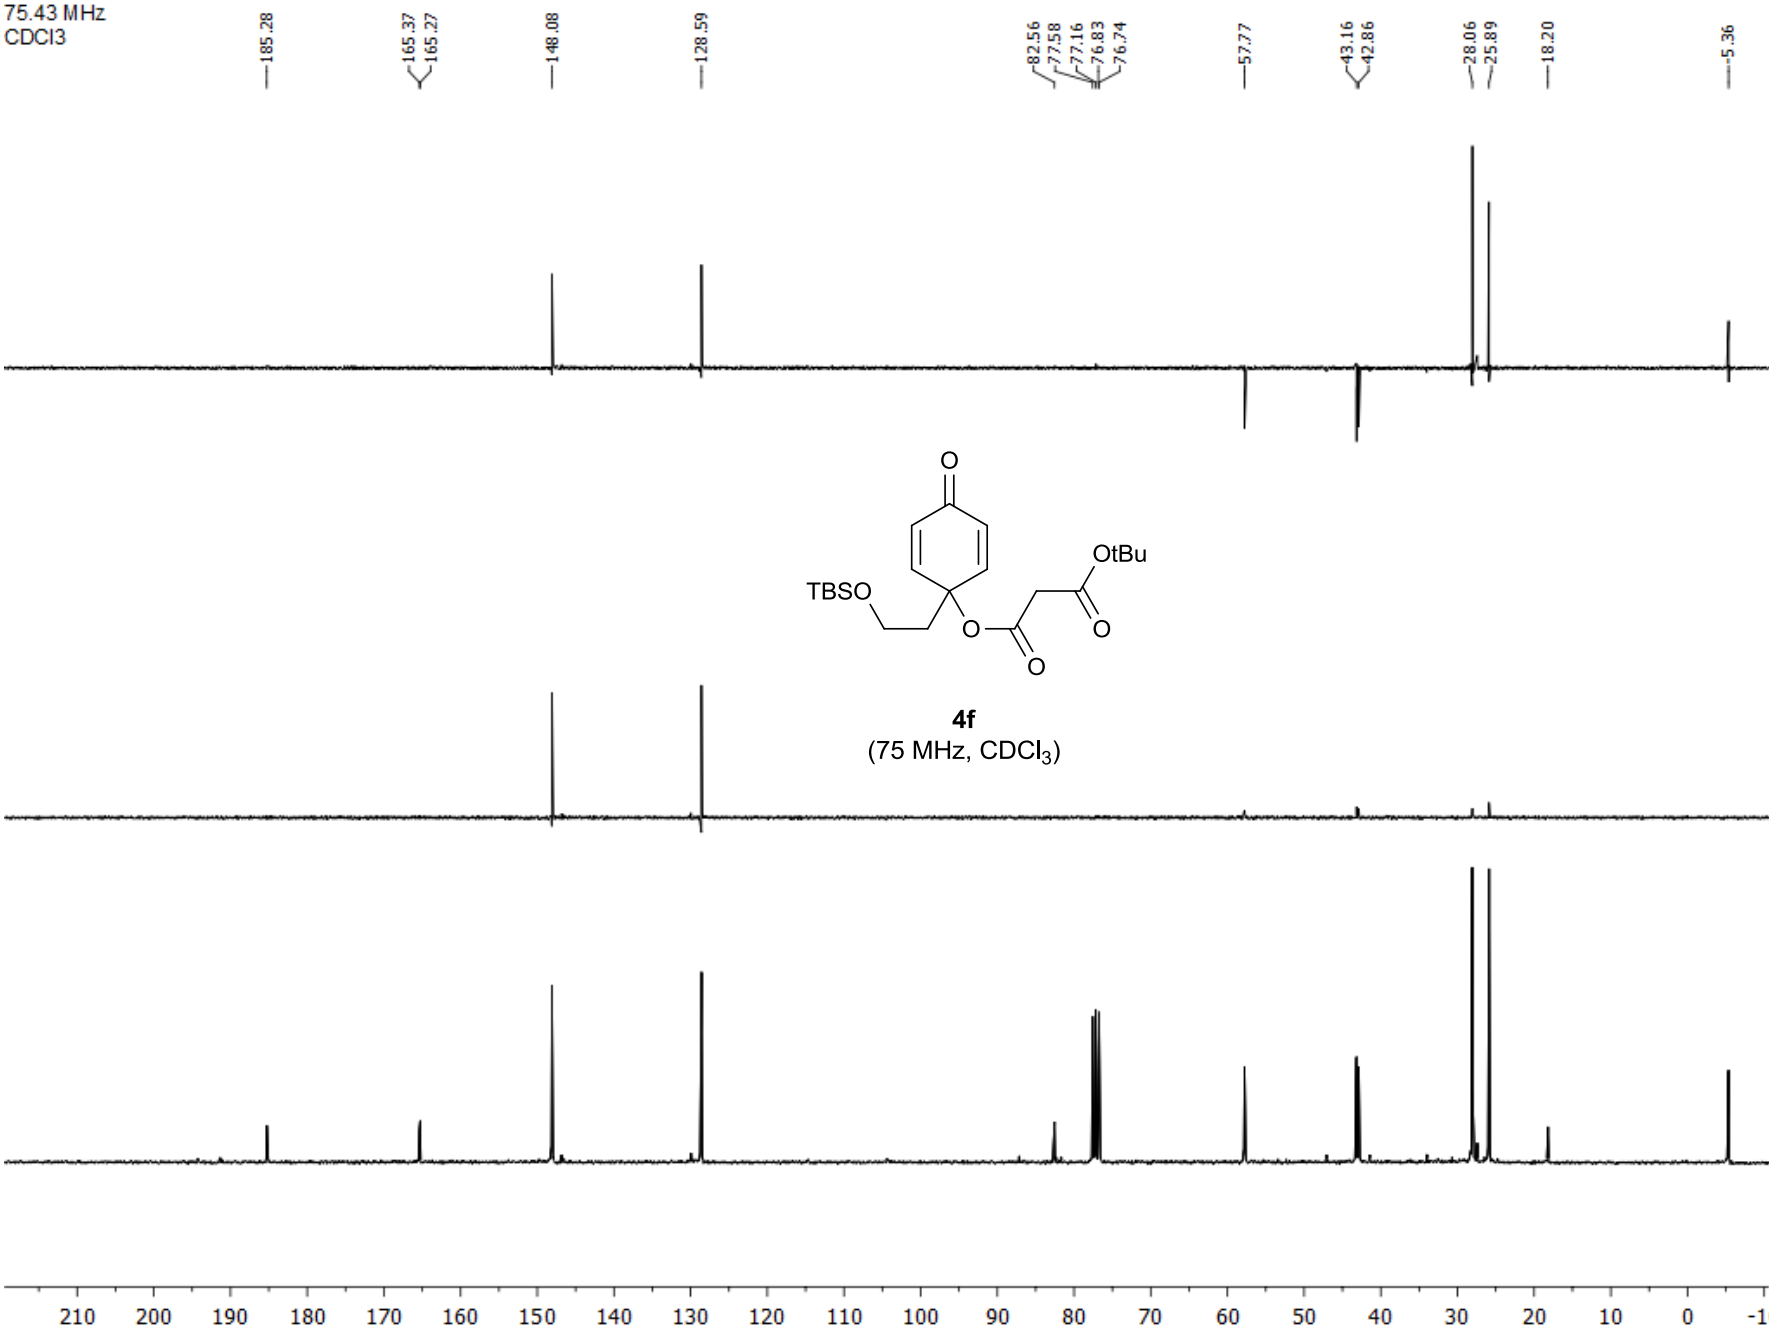

7.260

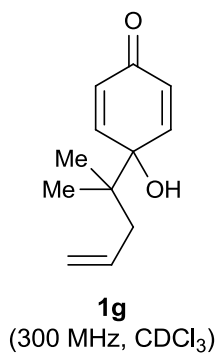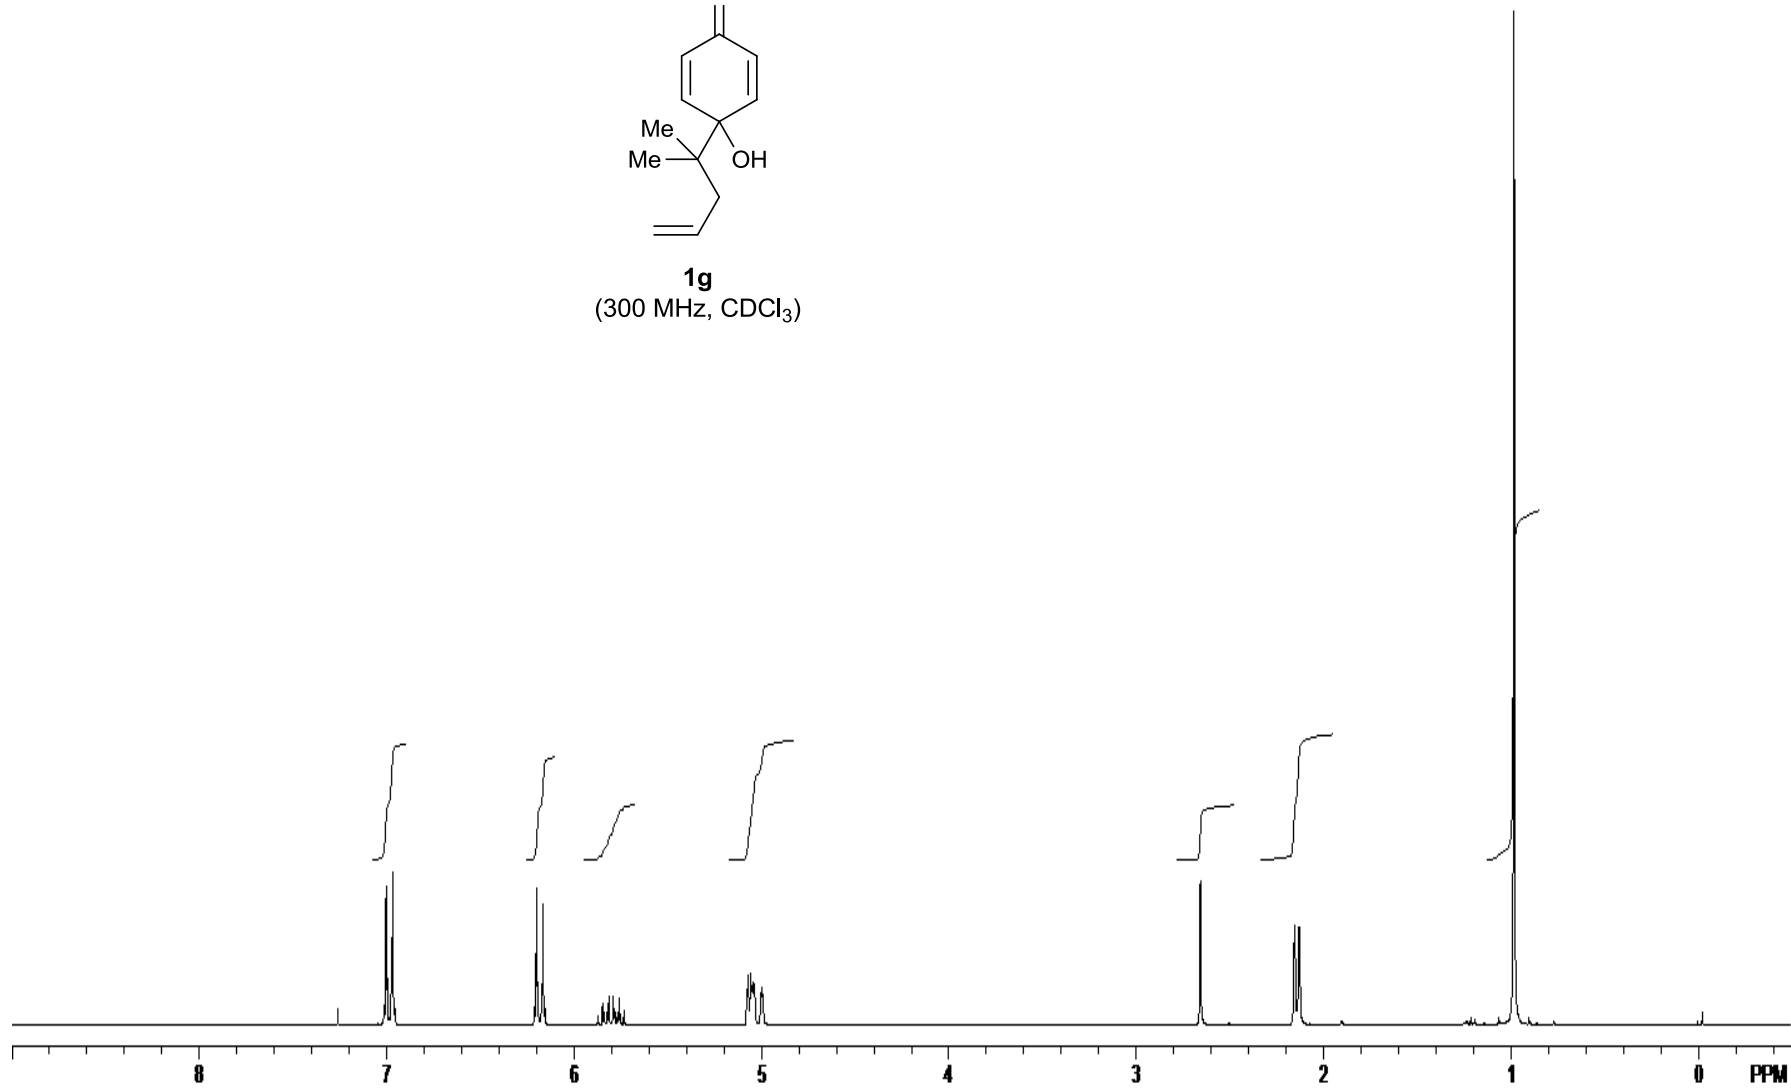

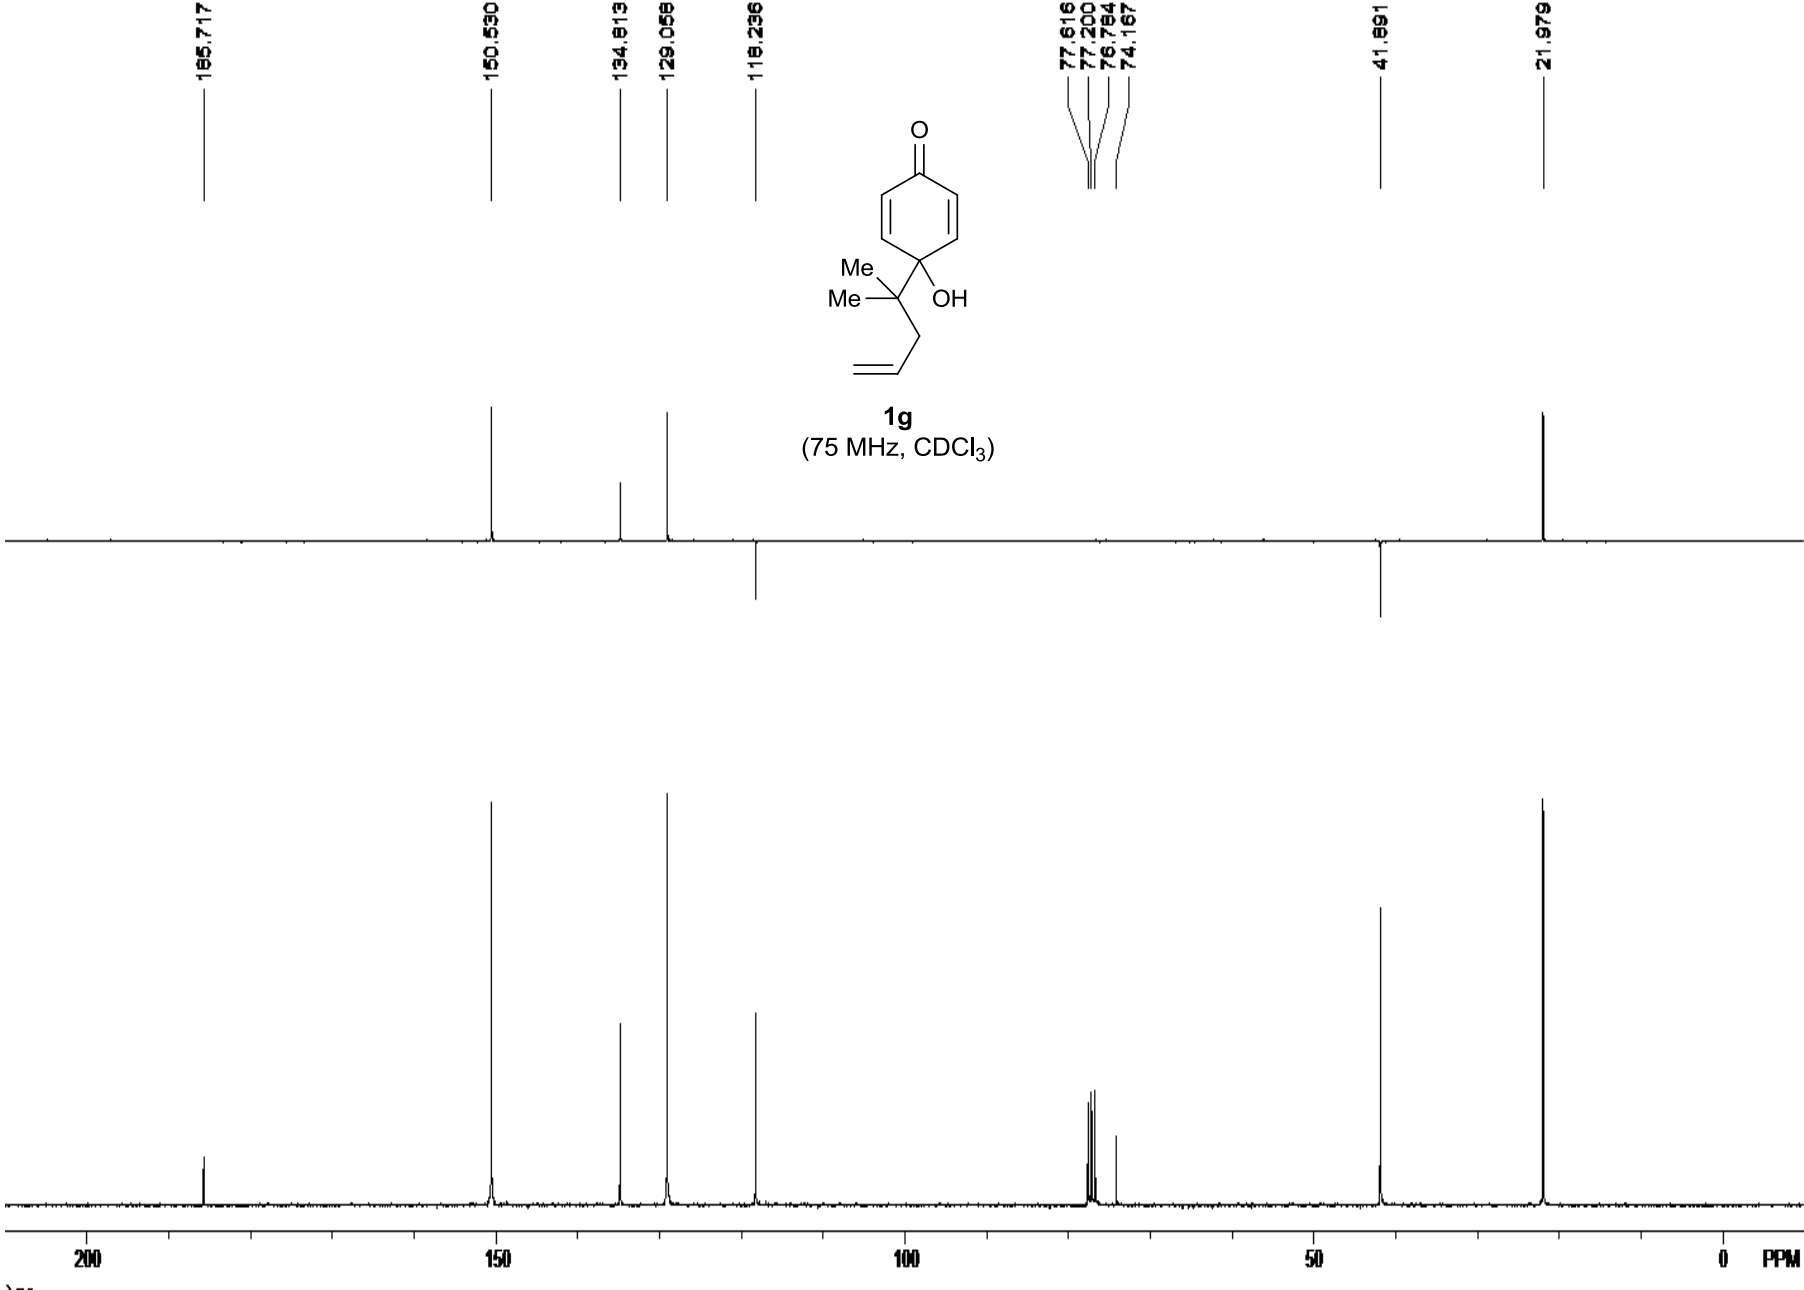

7.260

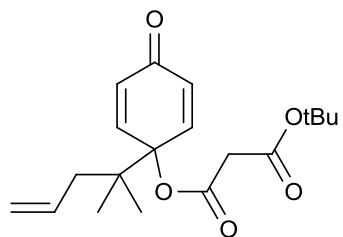

**4g**  
(300 MHz, CDCl<sub>3</sub>)

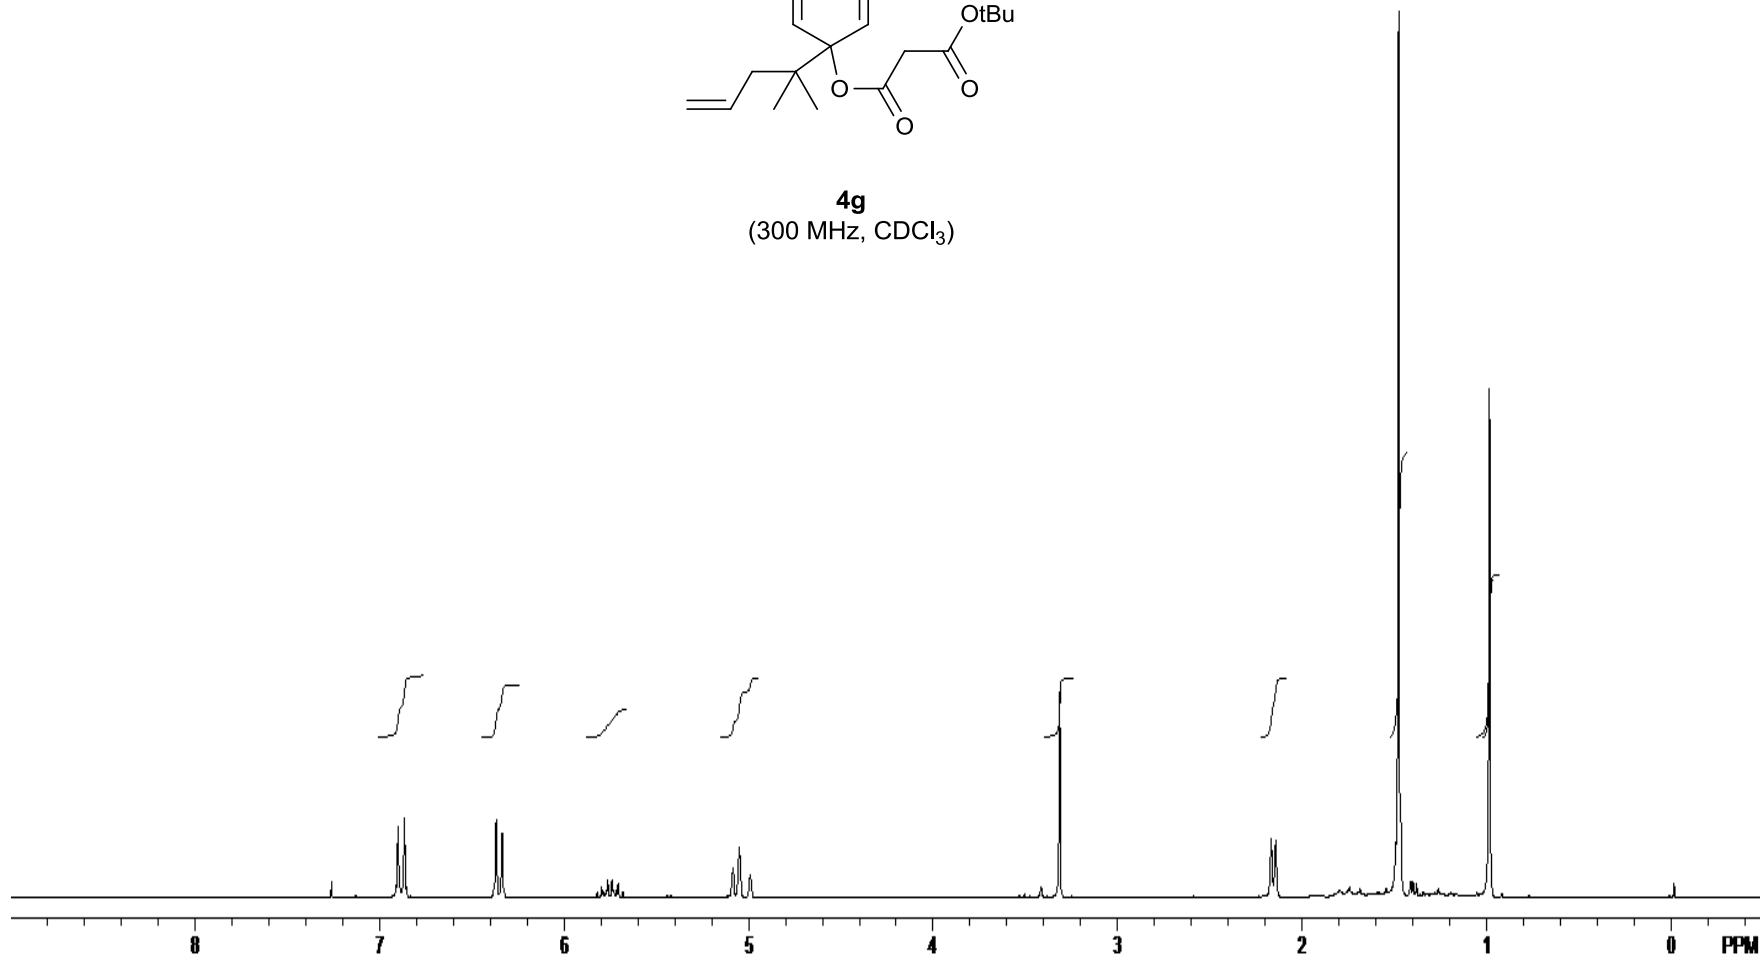

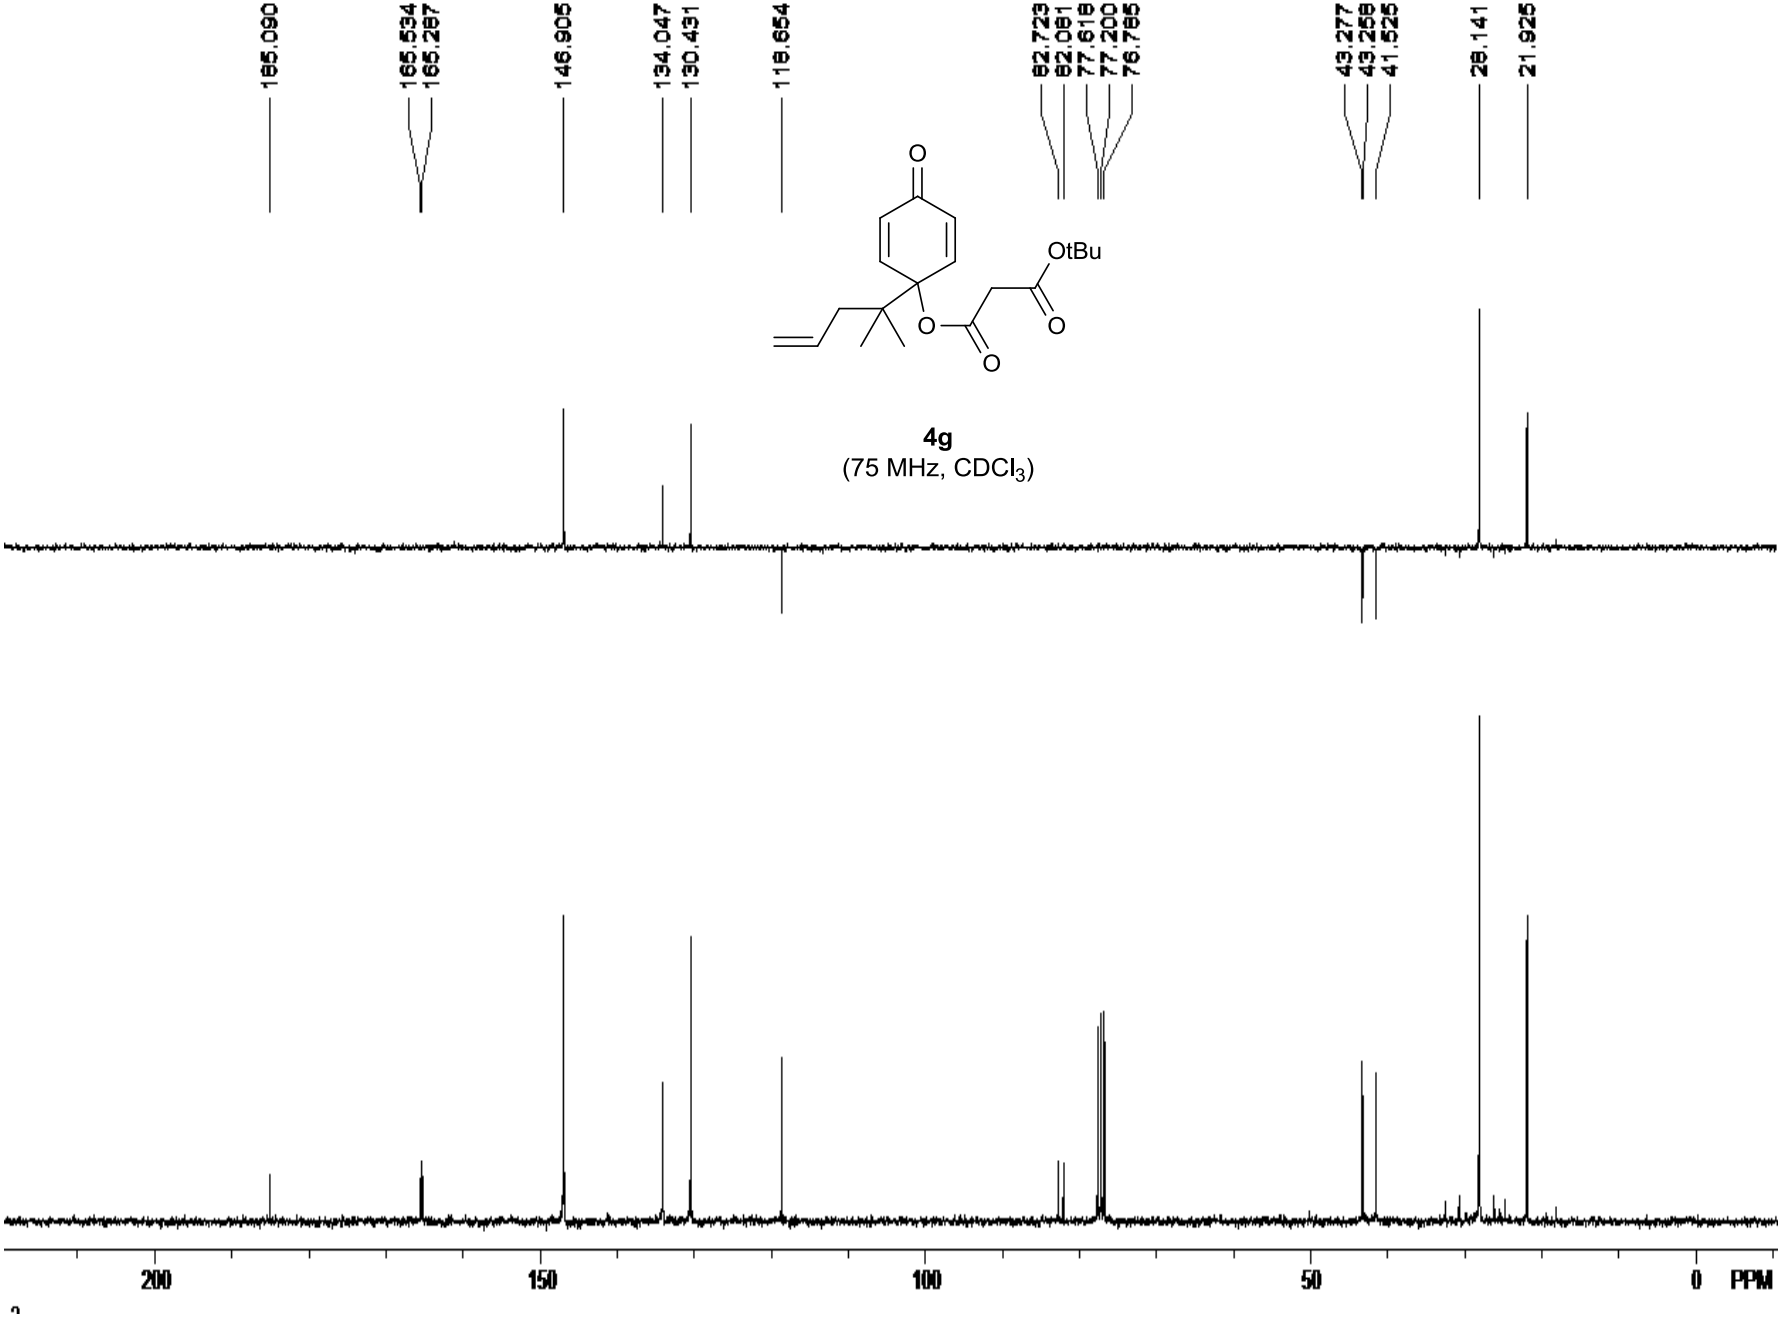

300.17 MHz  
cdcl3

7.26

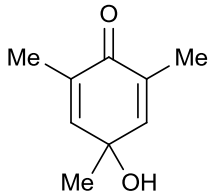

**1h**  
(300 MHz, CDCl<sub>3</sub>)

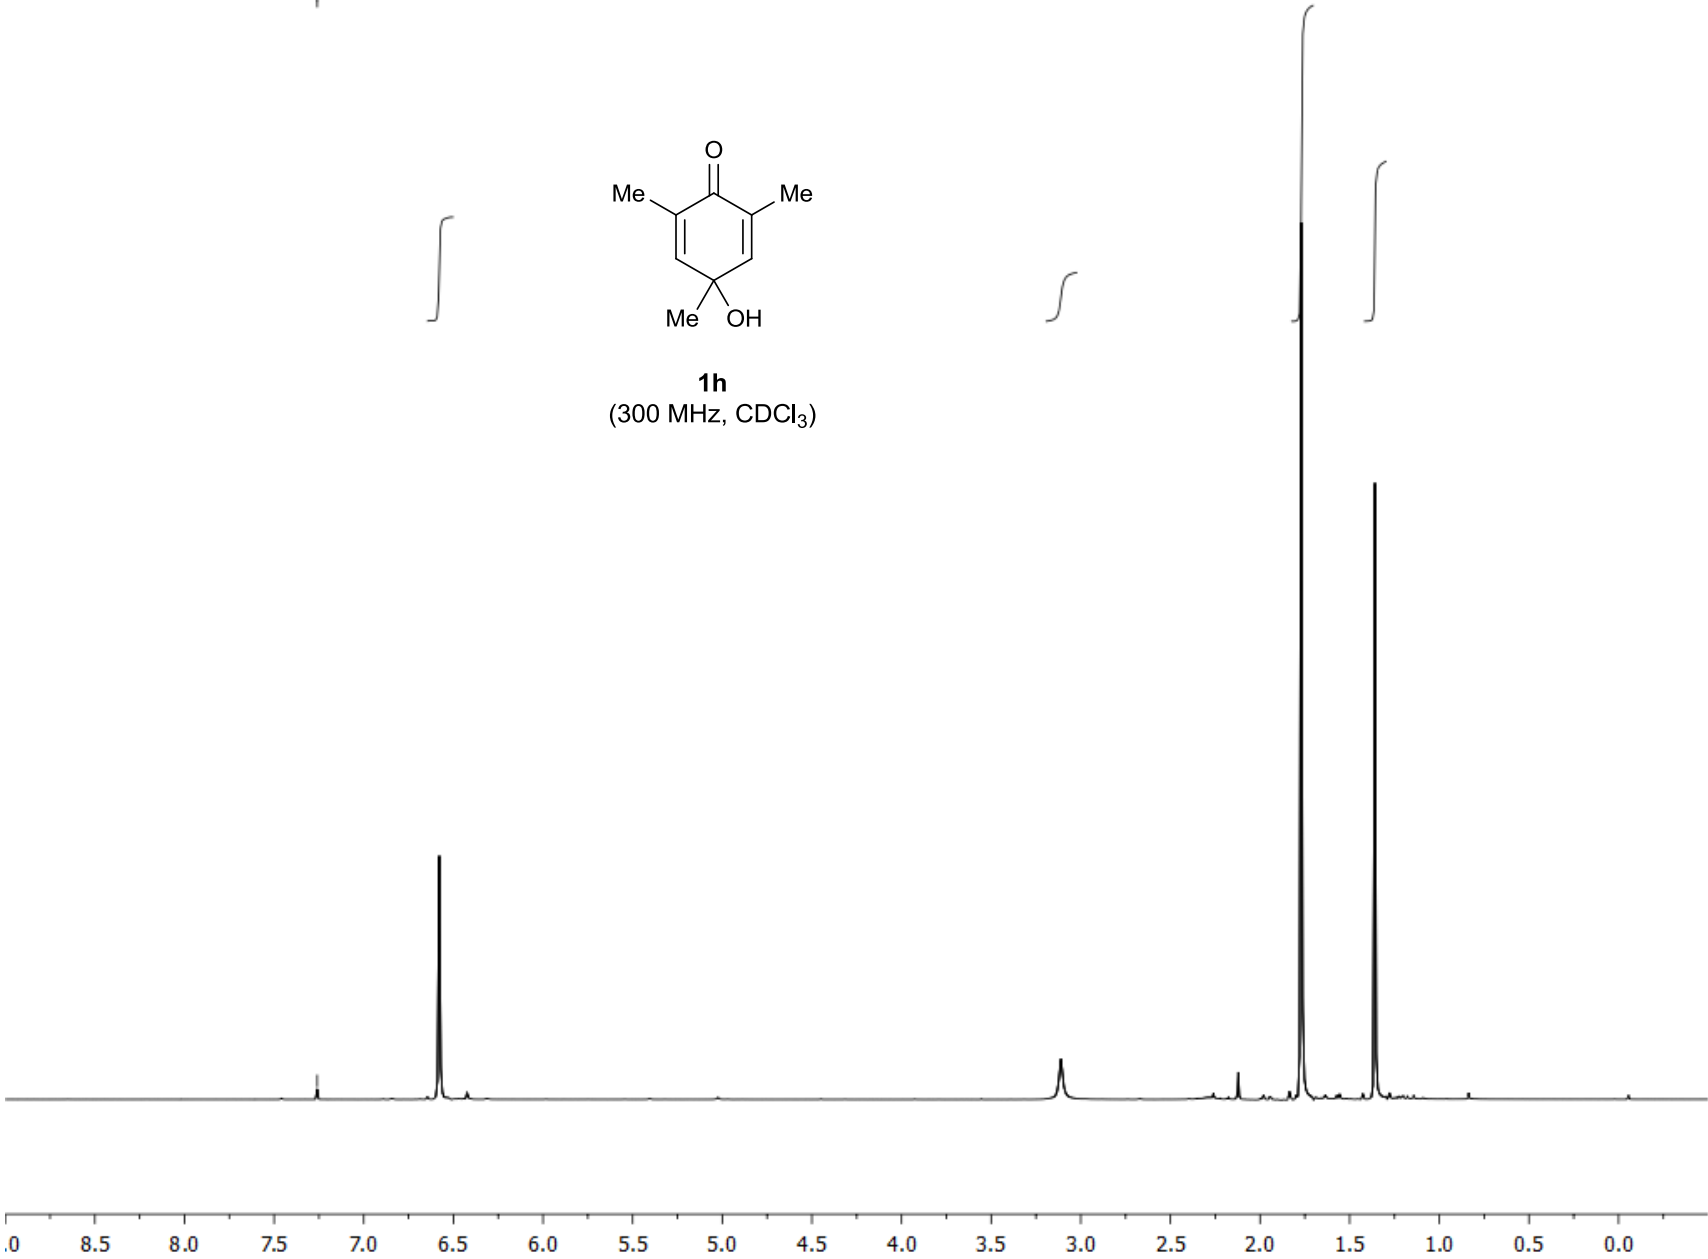

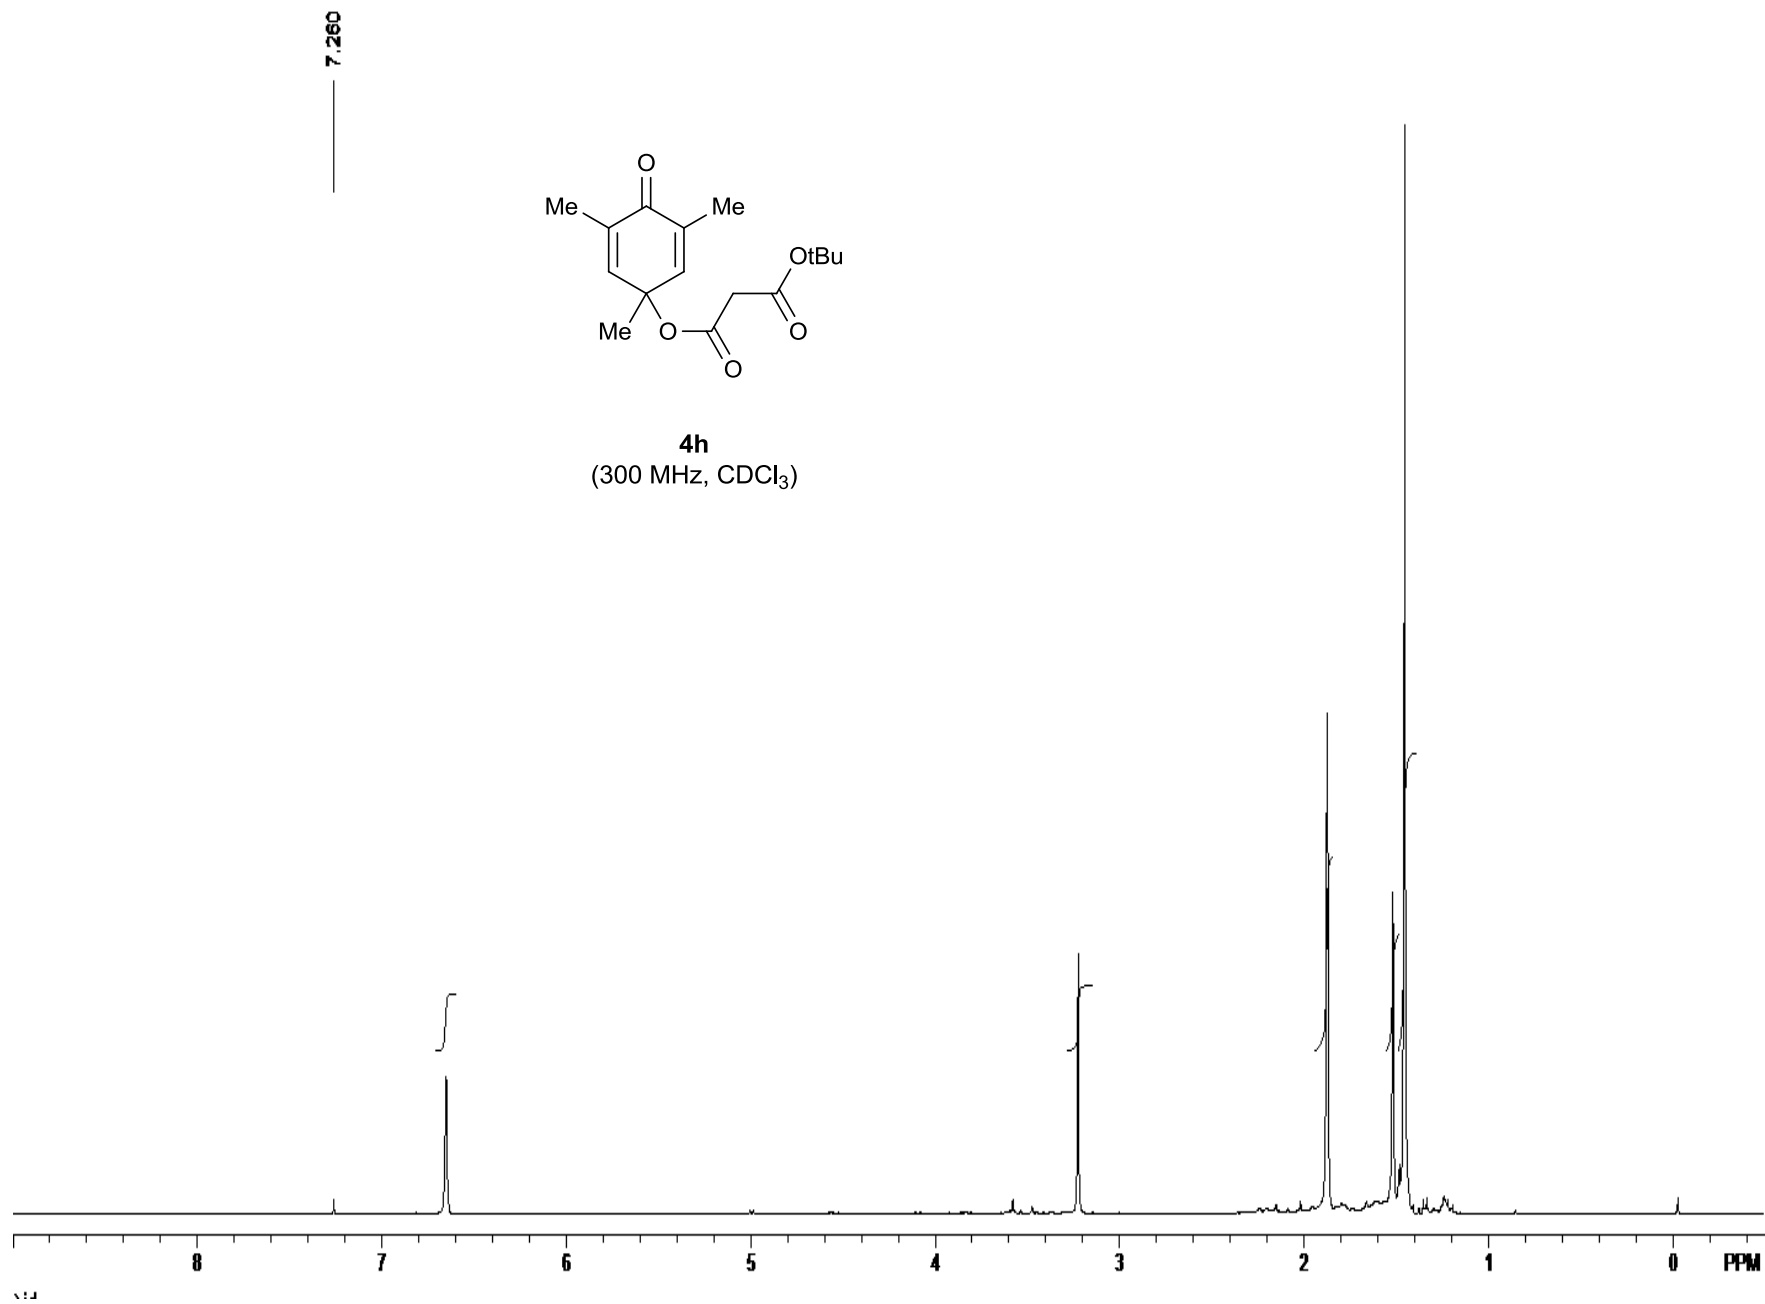

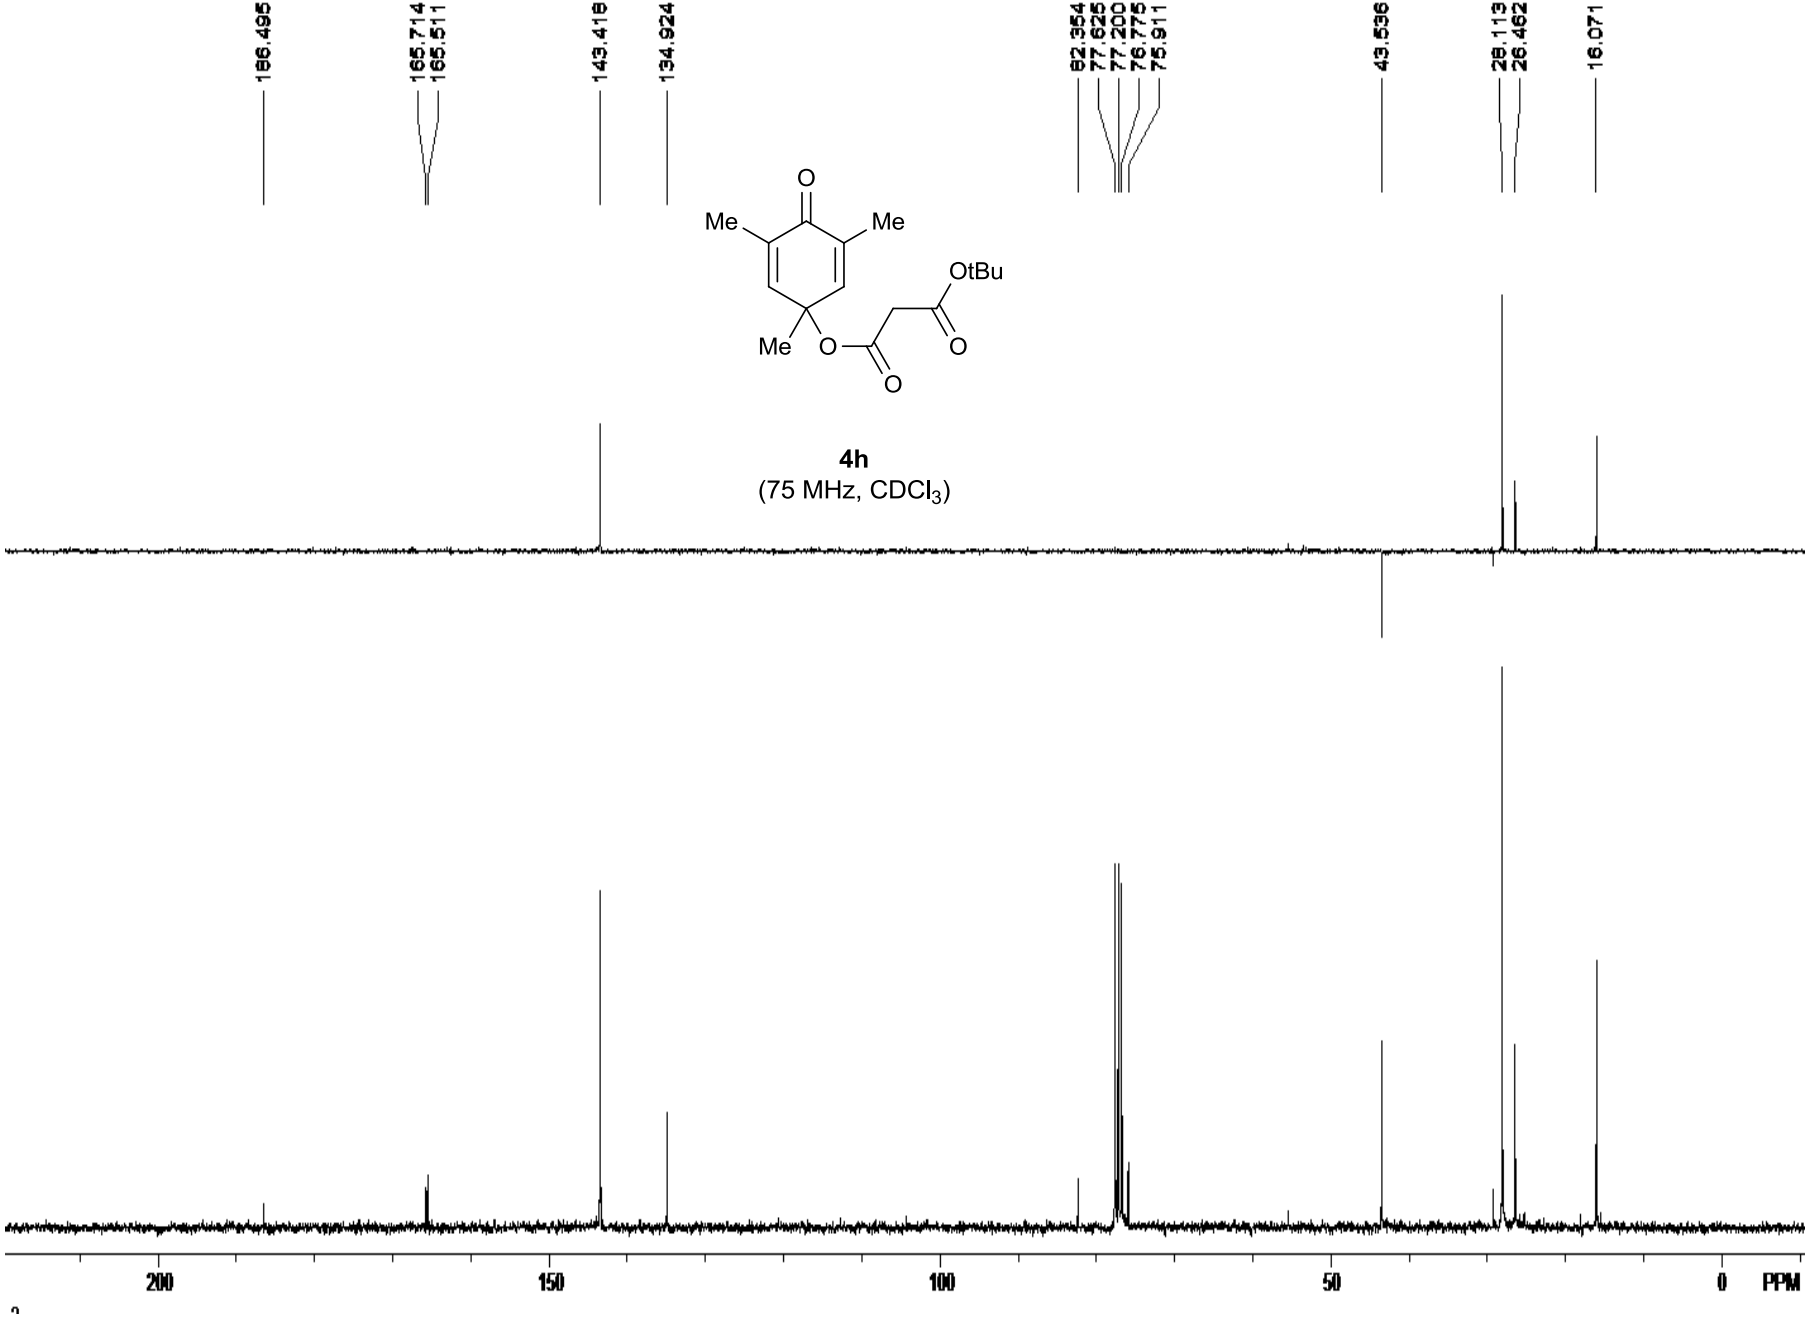



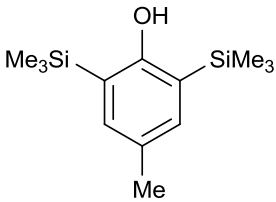

**S3**  
(300 MHz, CDCl<sub>3</sub>)

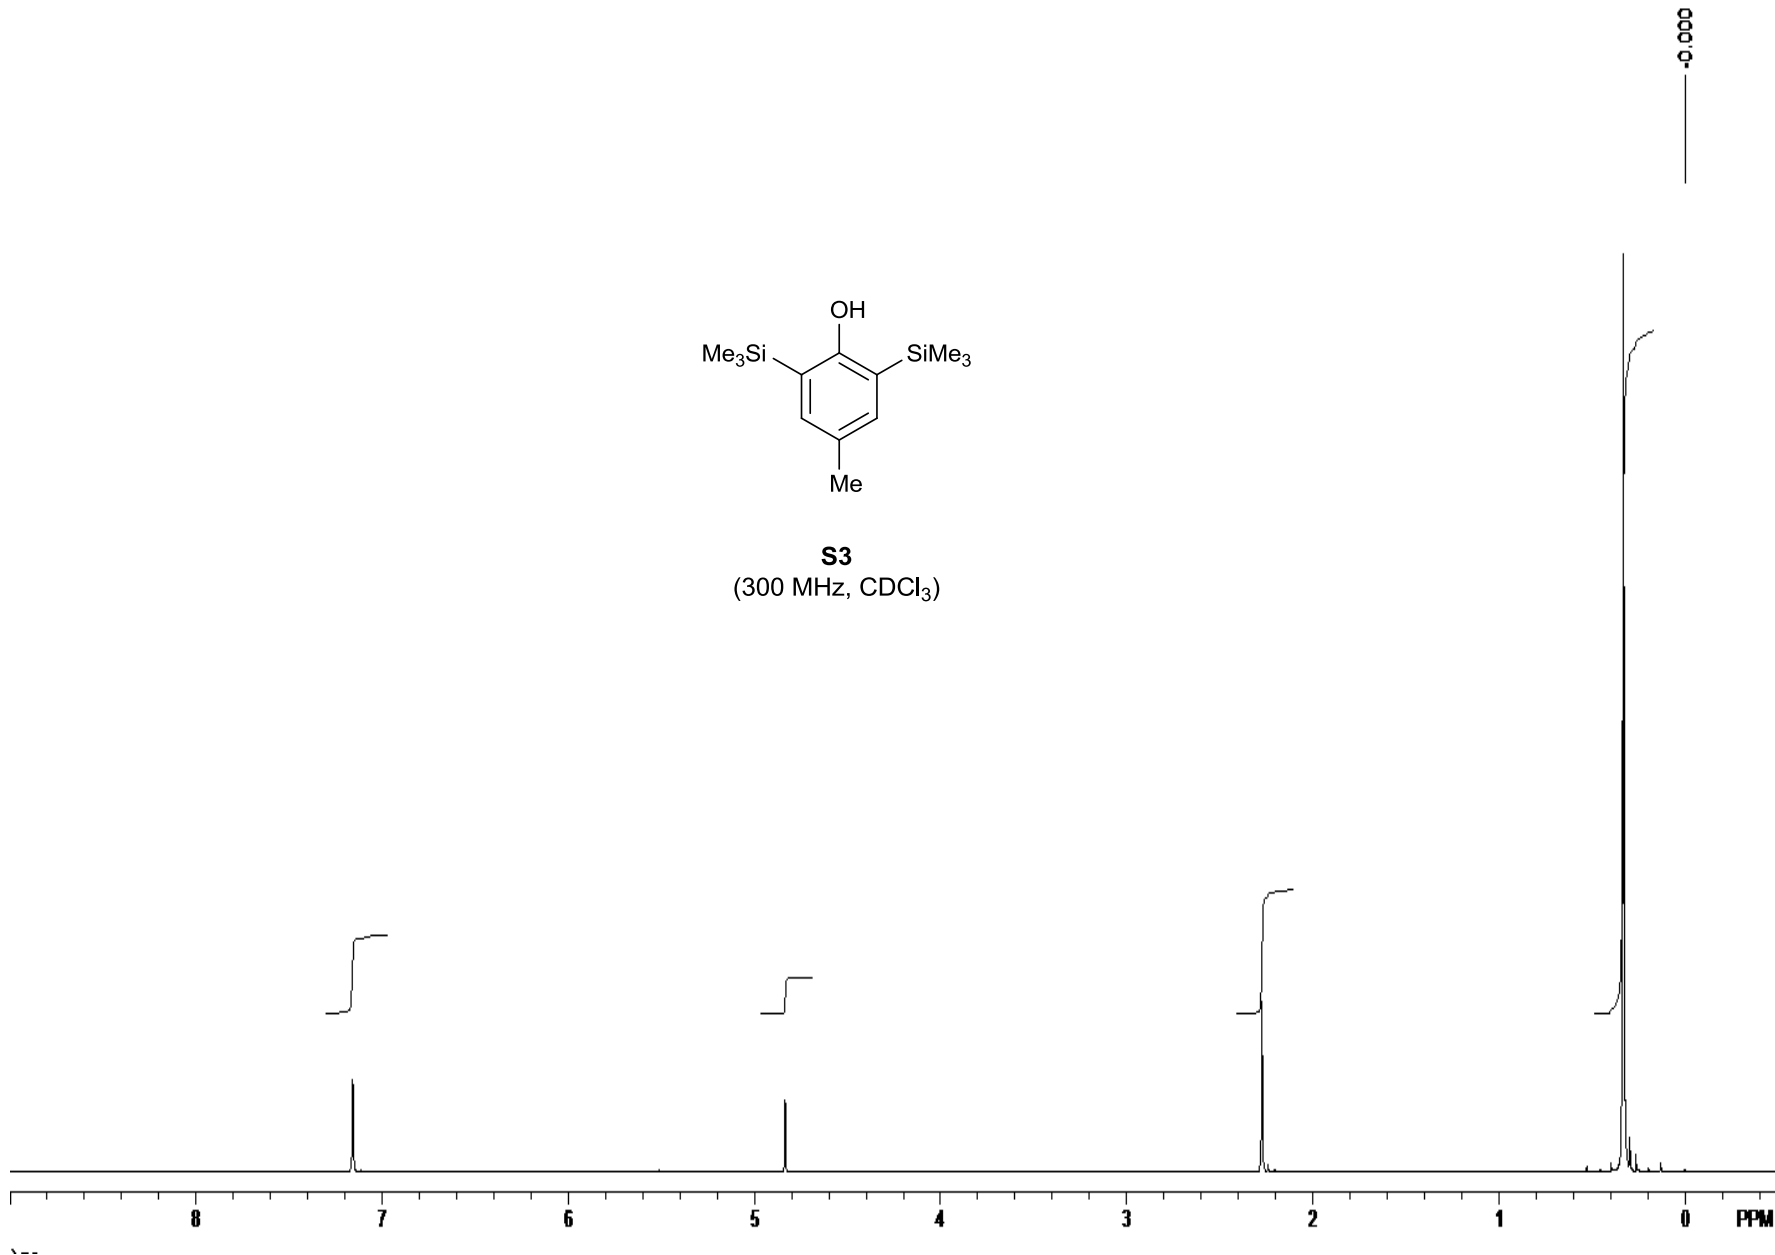

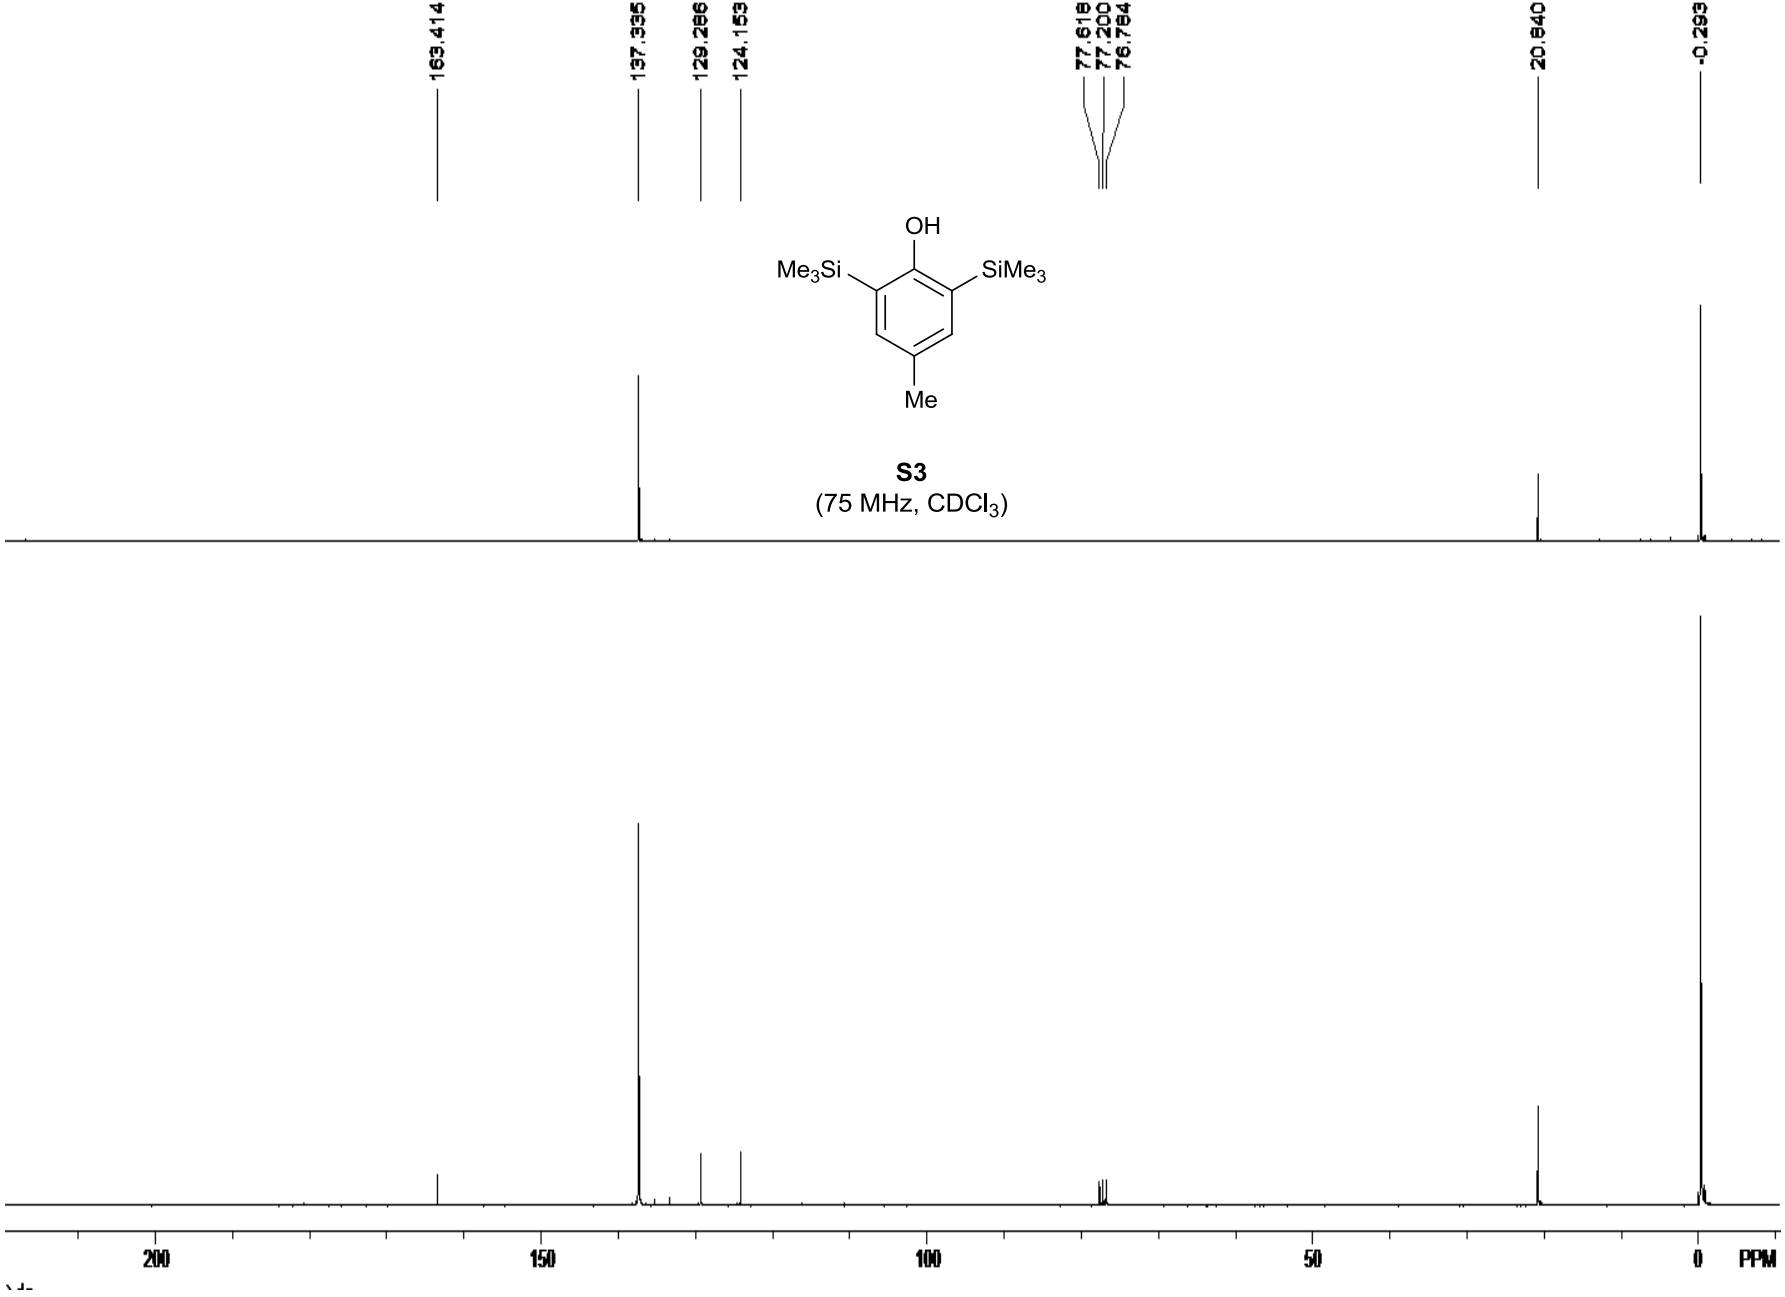

7.260

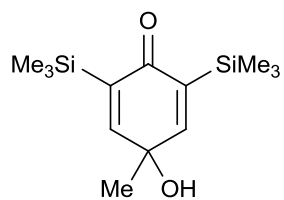

**1i**  
(300 MHz, CDCl<sub>3</sub>)

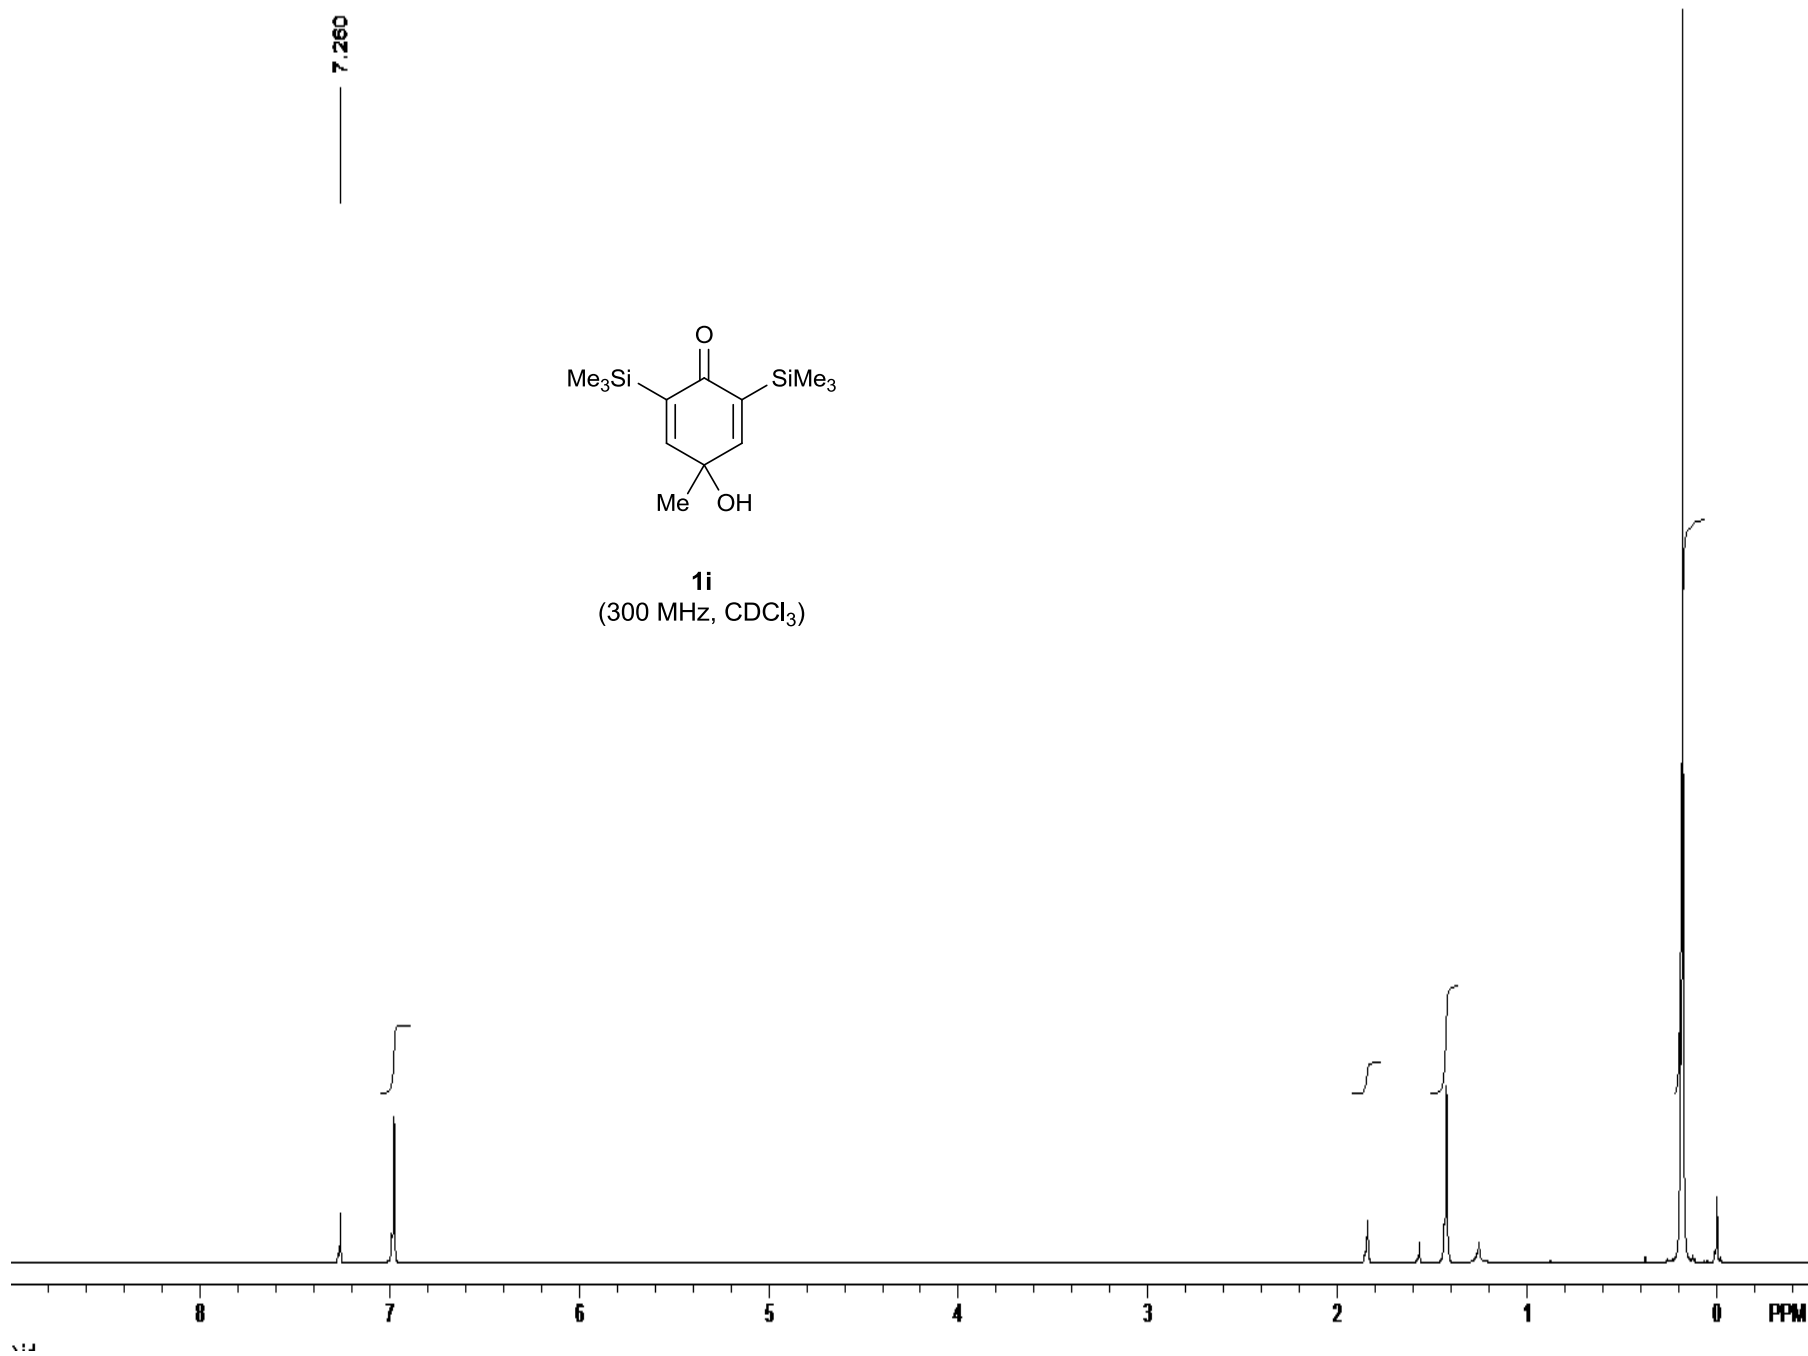

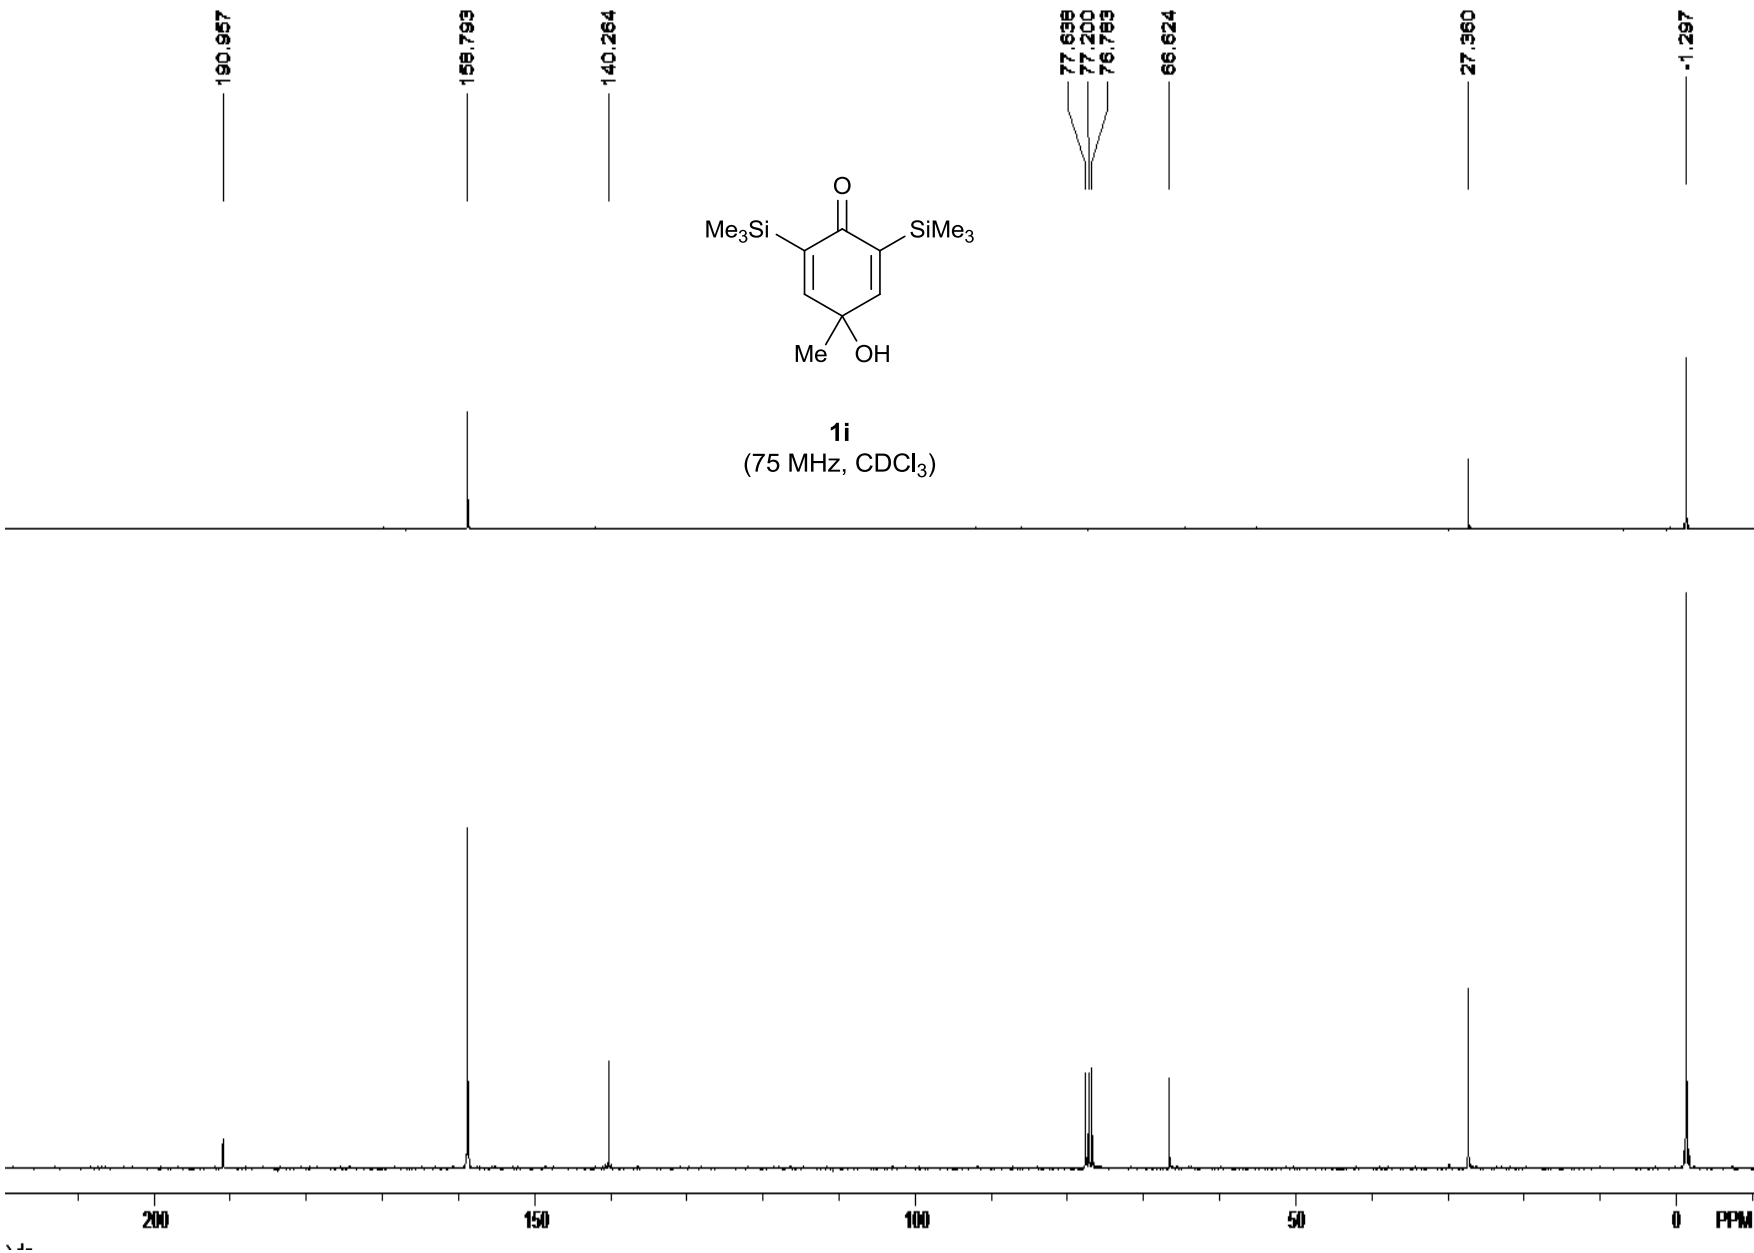

7.260

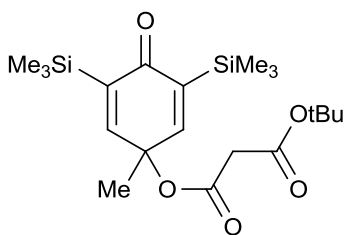

**4i**  
(300 MHz, CDCl<sub>3</sub>)

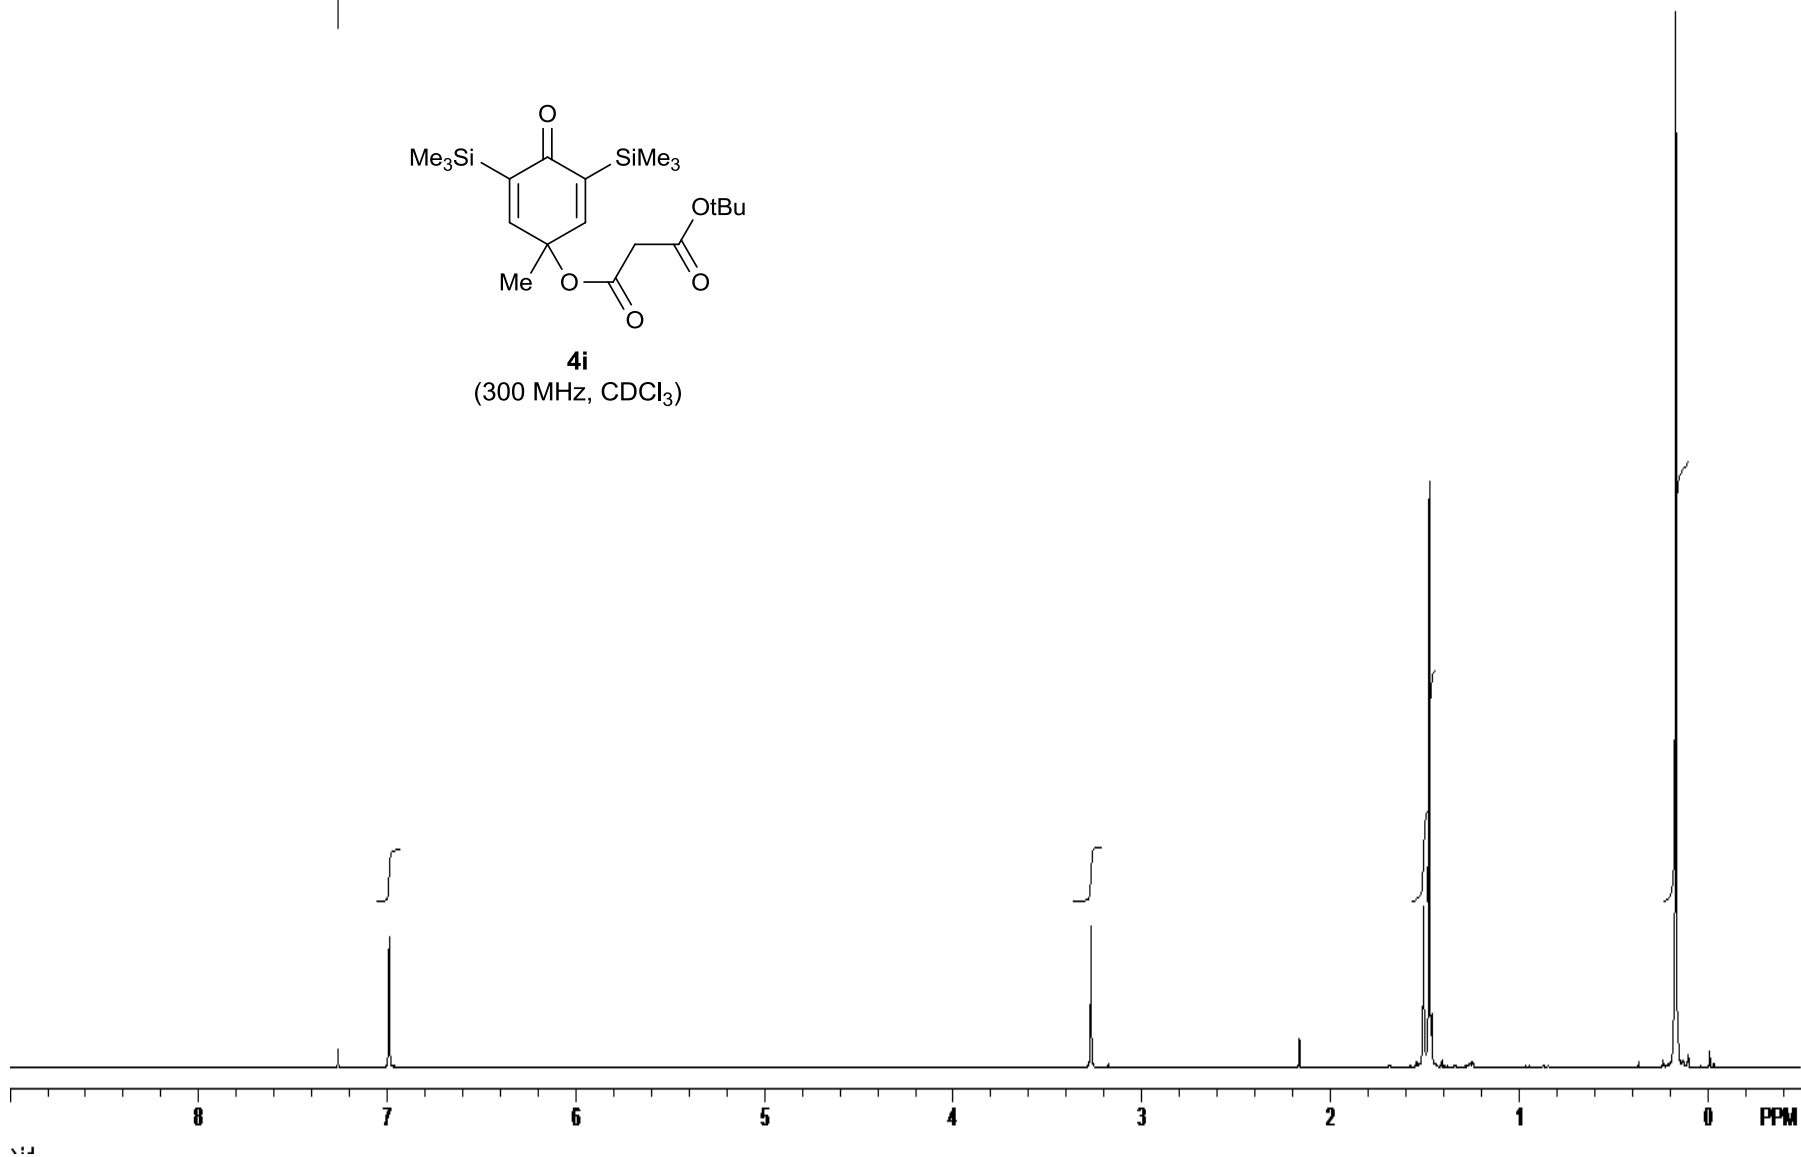

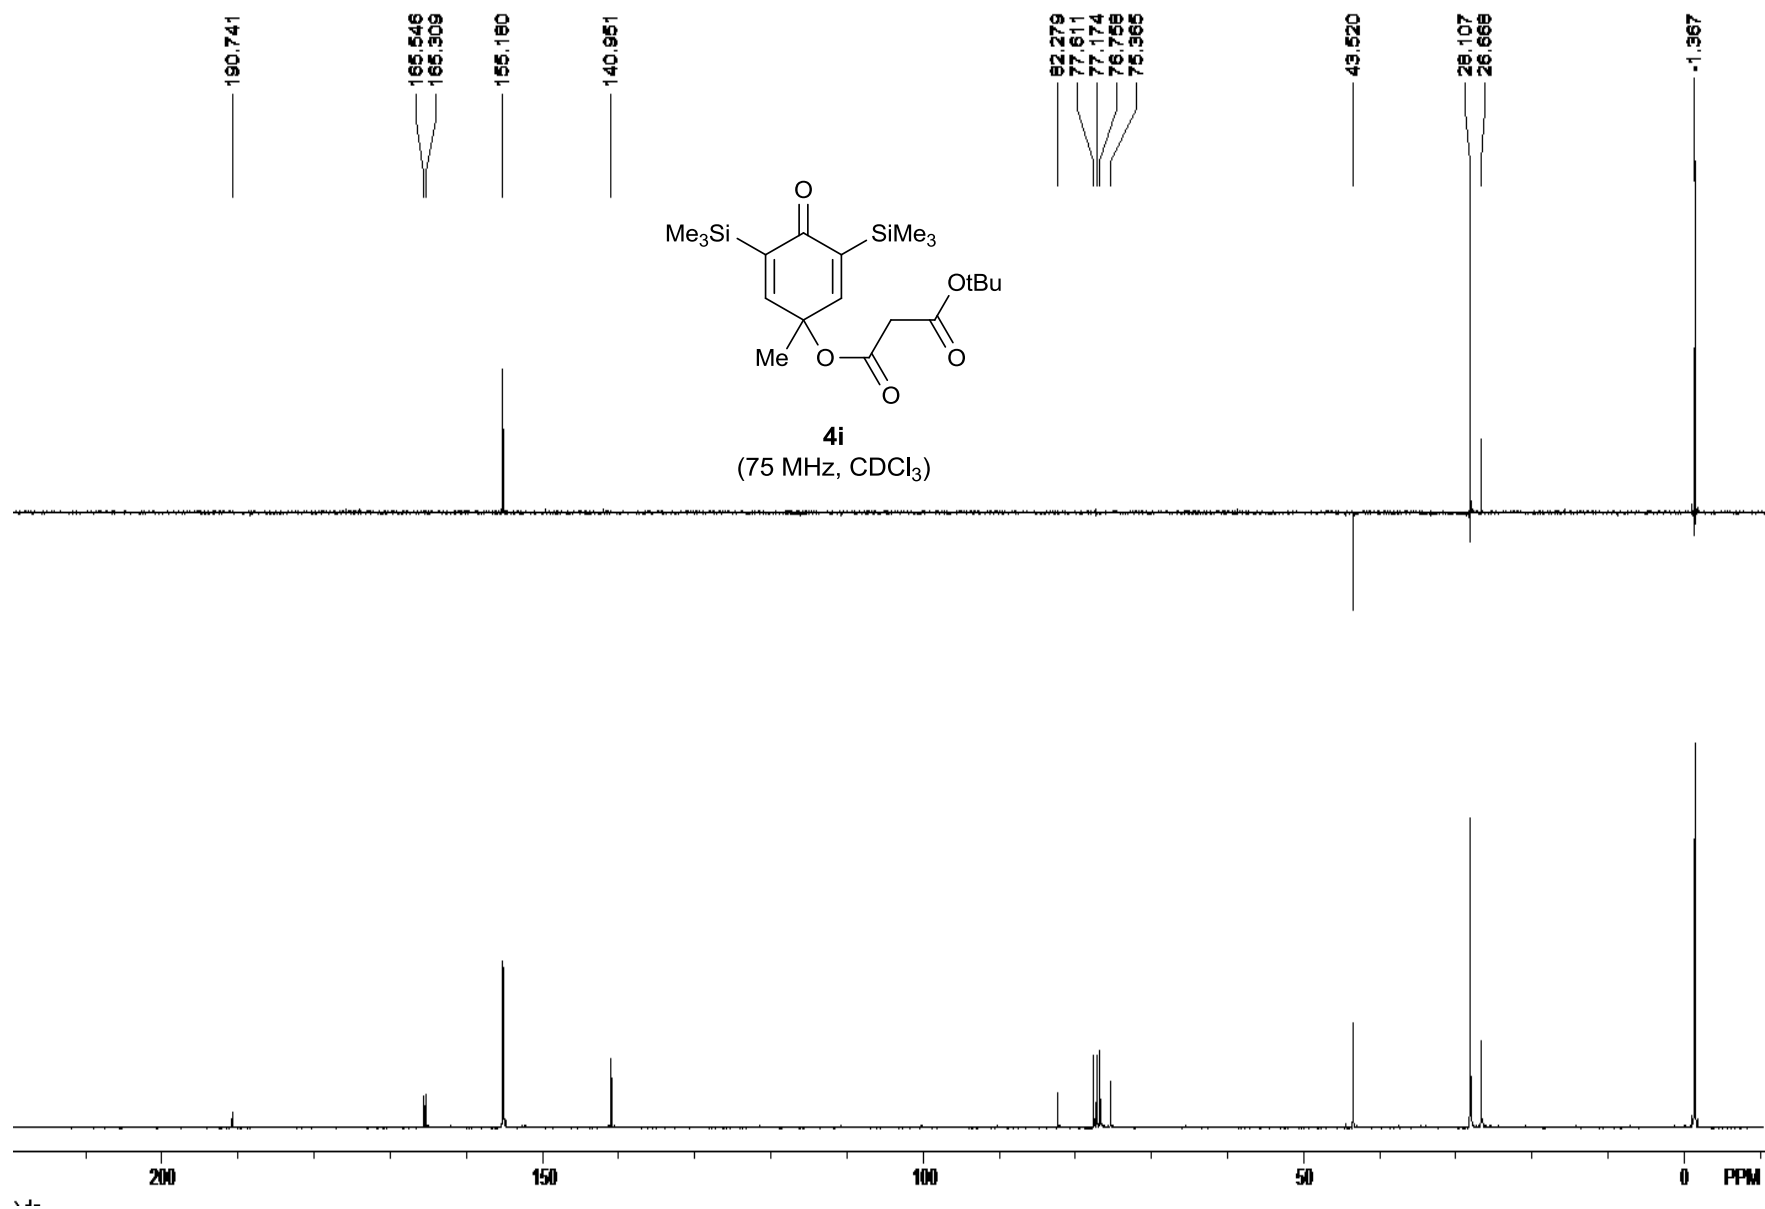

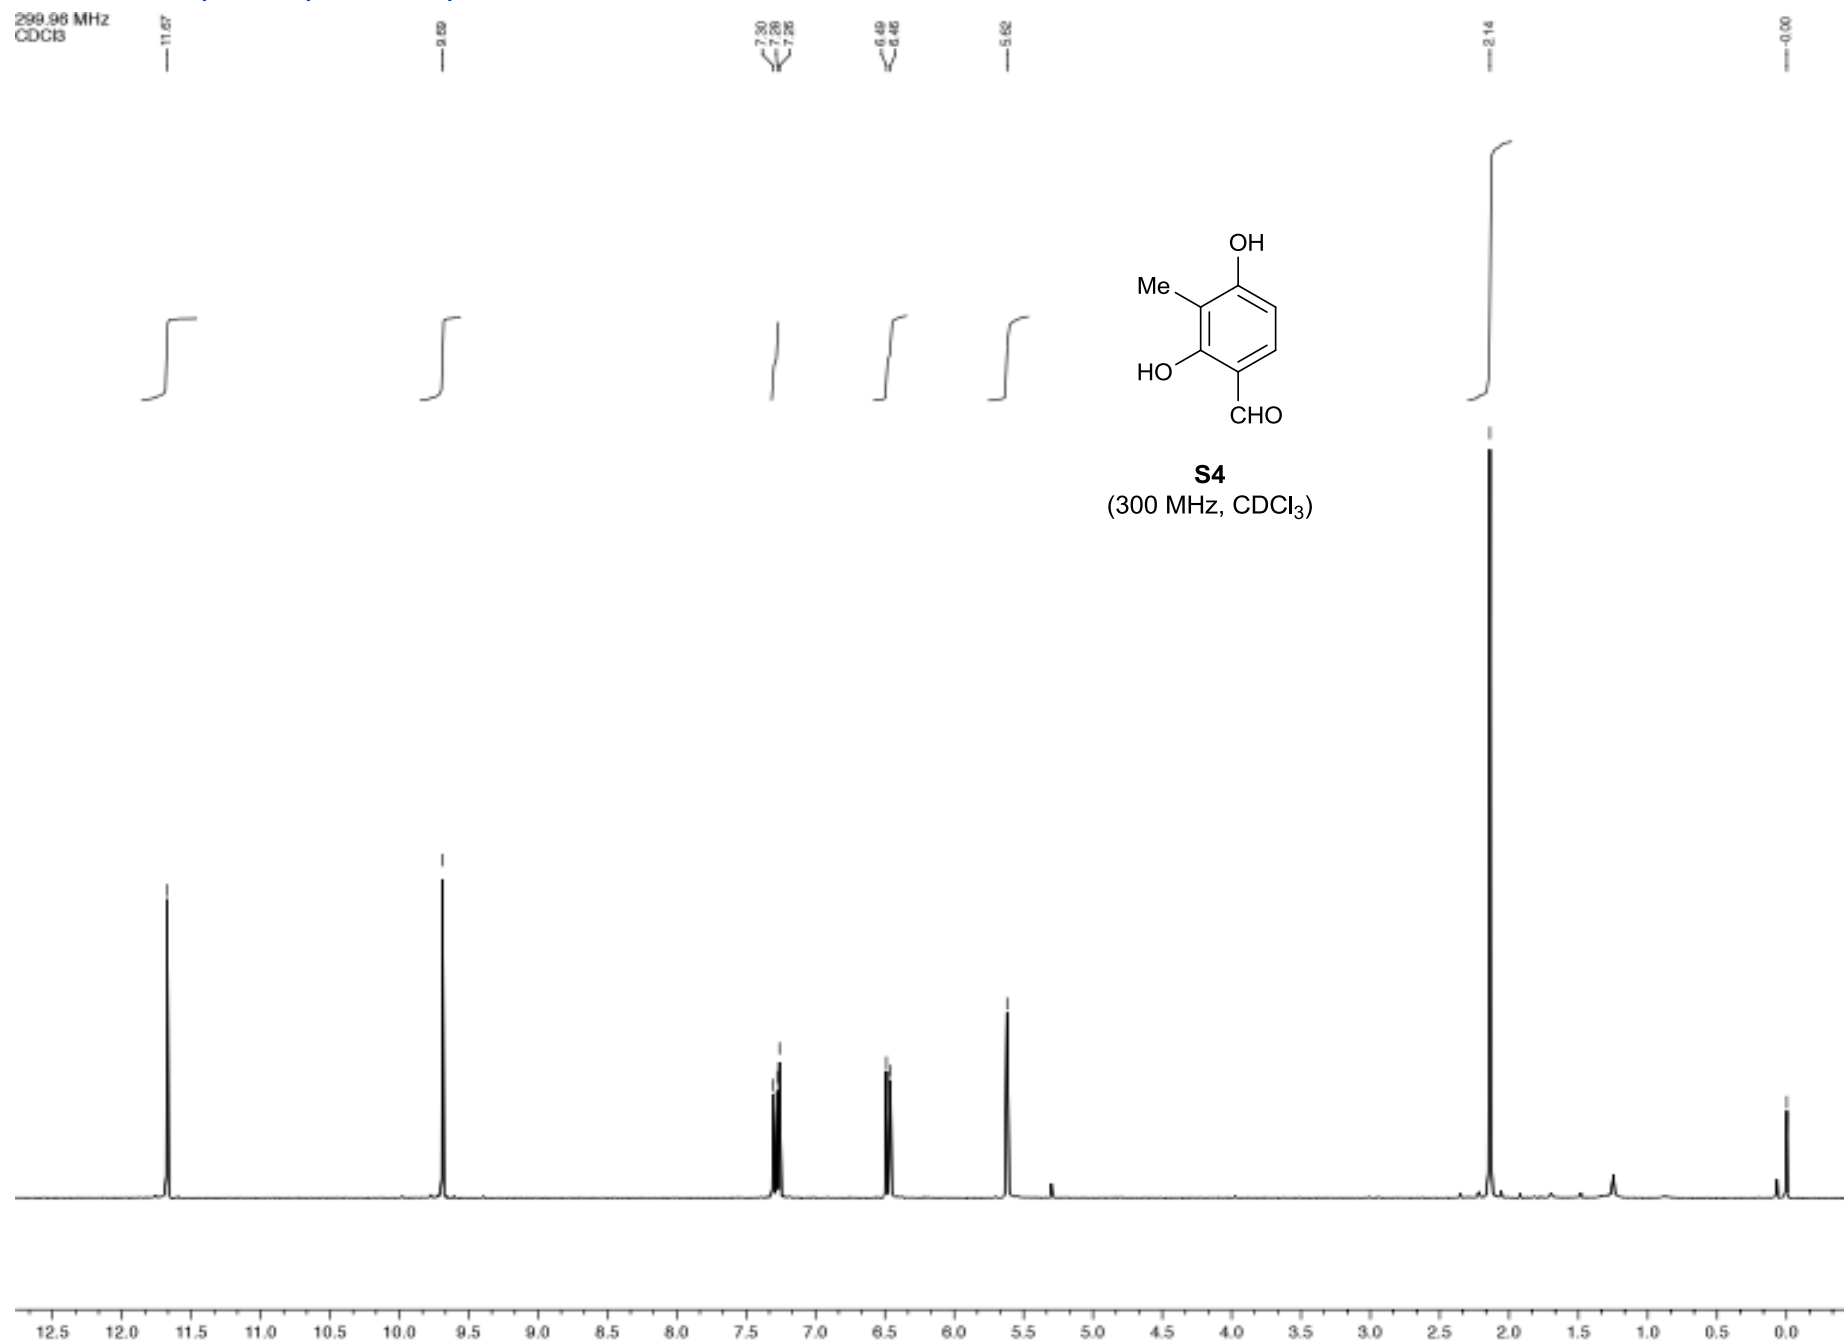

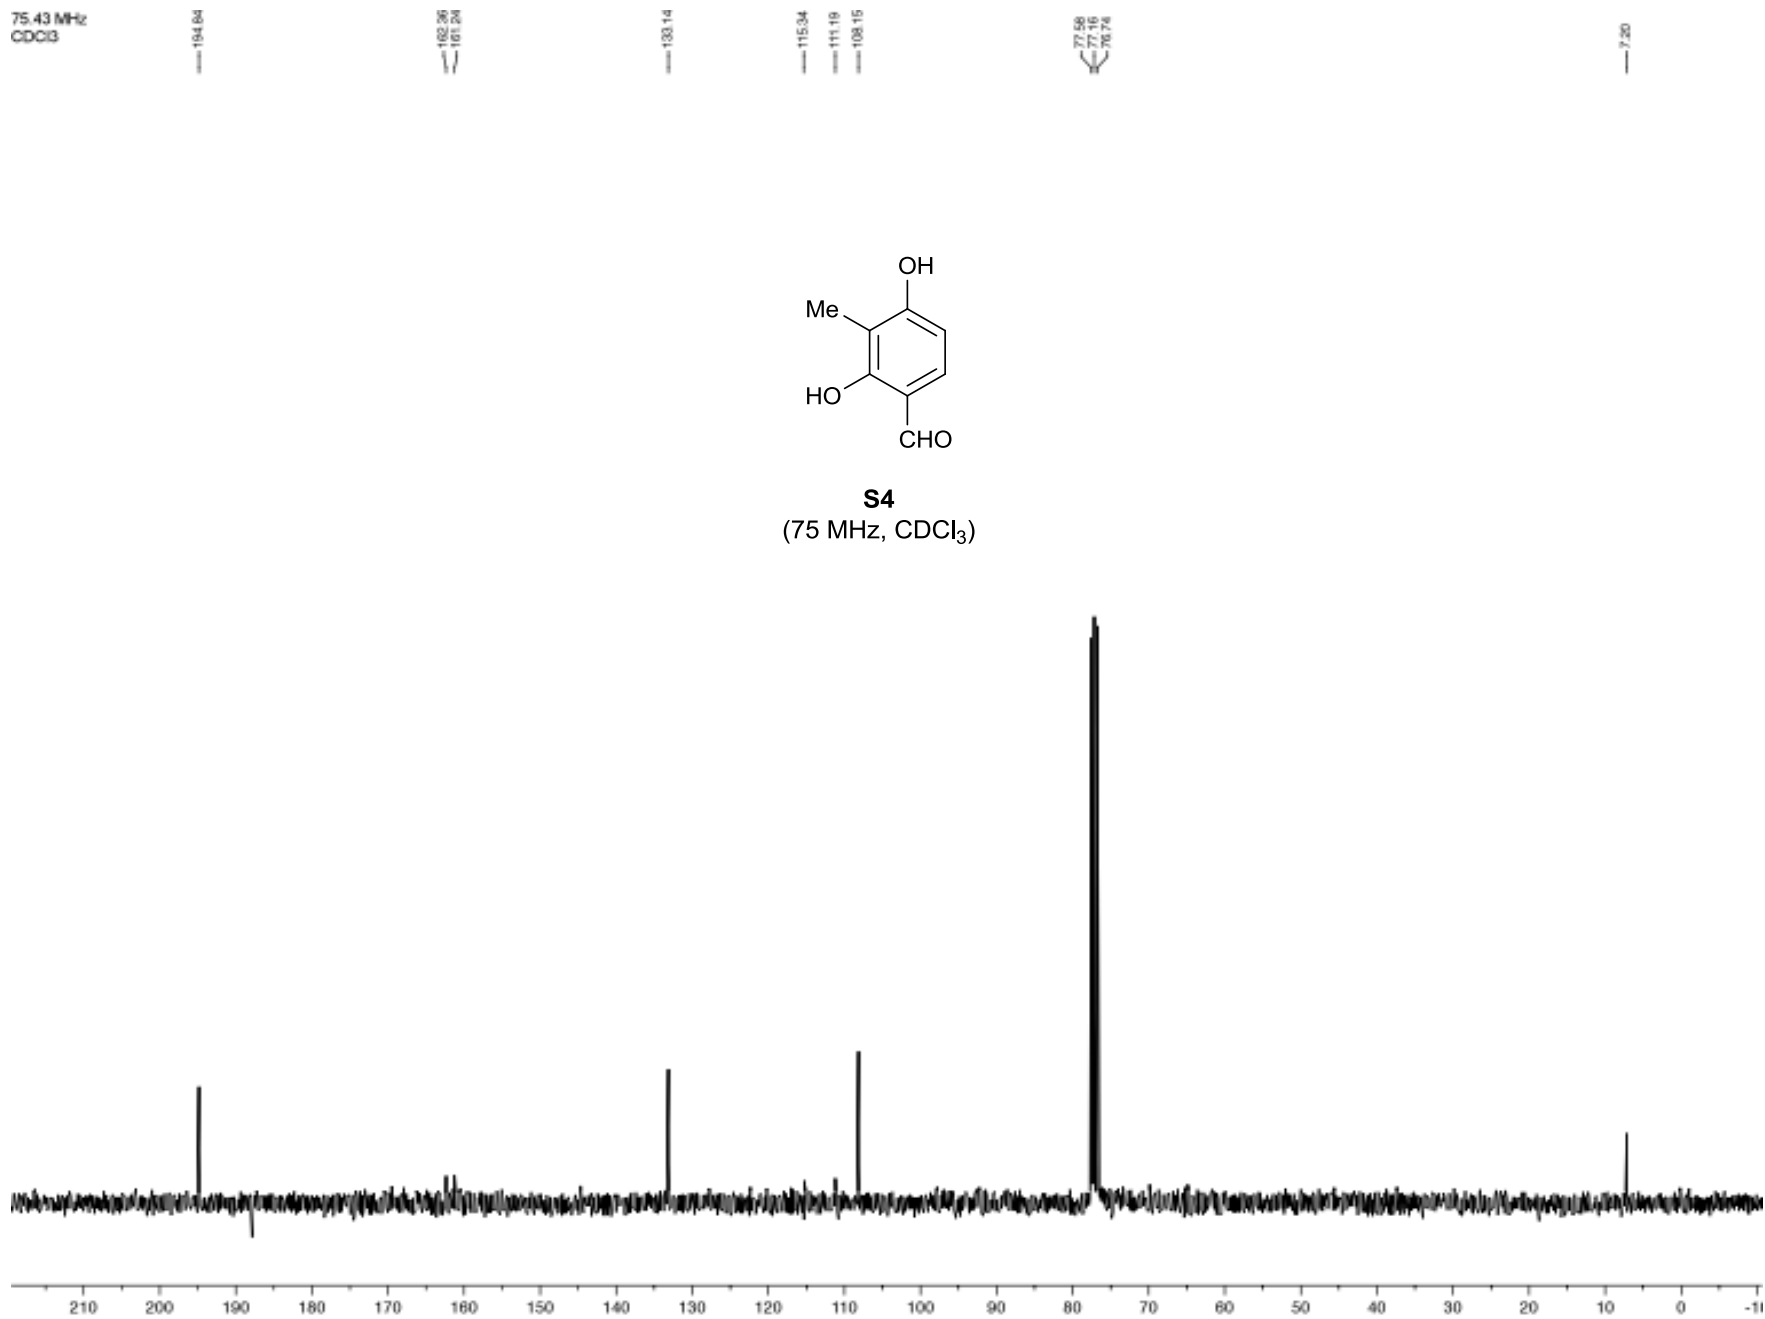





75.43 MHz  
CDCl<sub>3</sub>

194.04

168.92

161.29

136.41

133.32

128.81

128.59

127.18

115.94

104.42

104.19

77.59

77.16

76.74

76.37

7.72

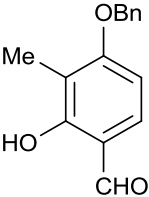

**S5**  
(75 MHz, CDCl<sub>3</sub>)

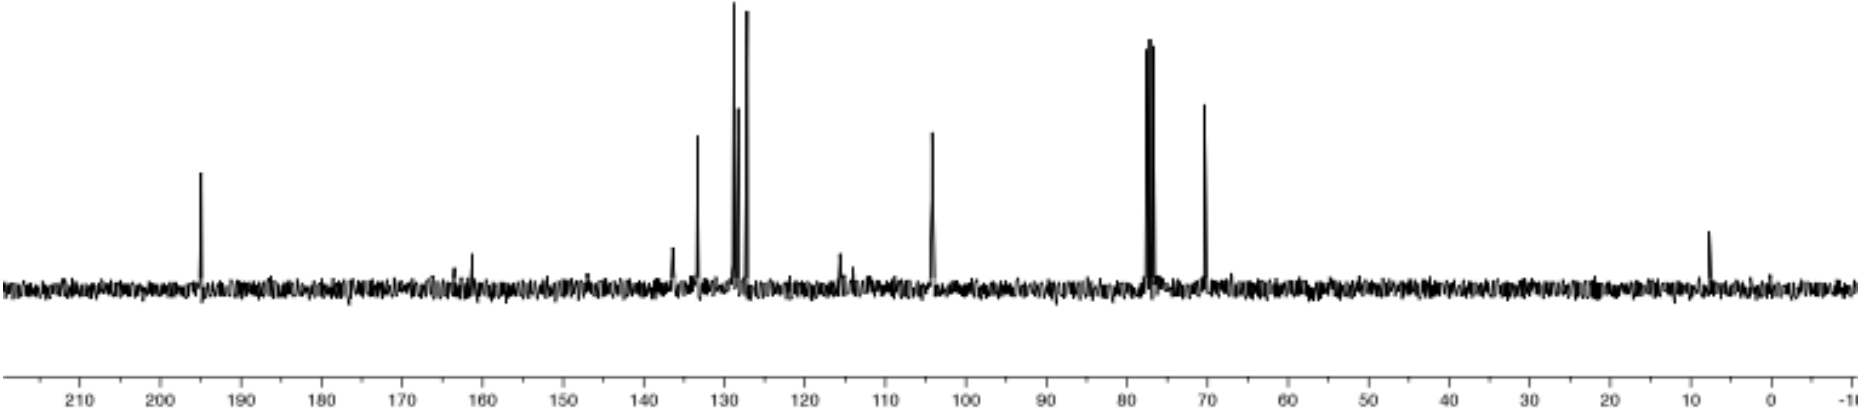

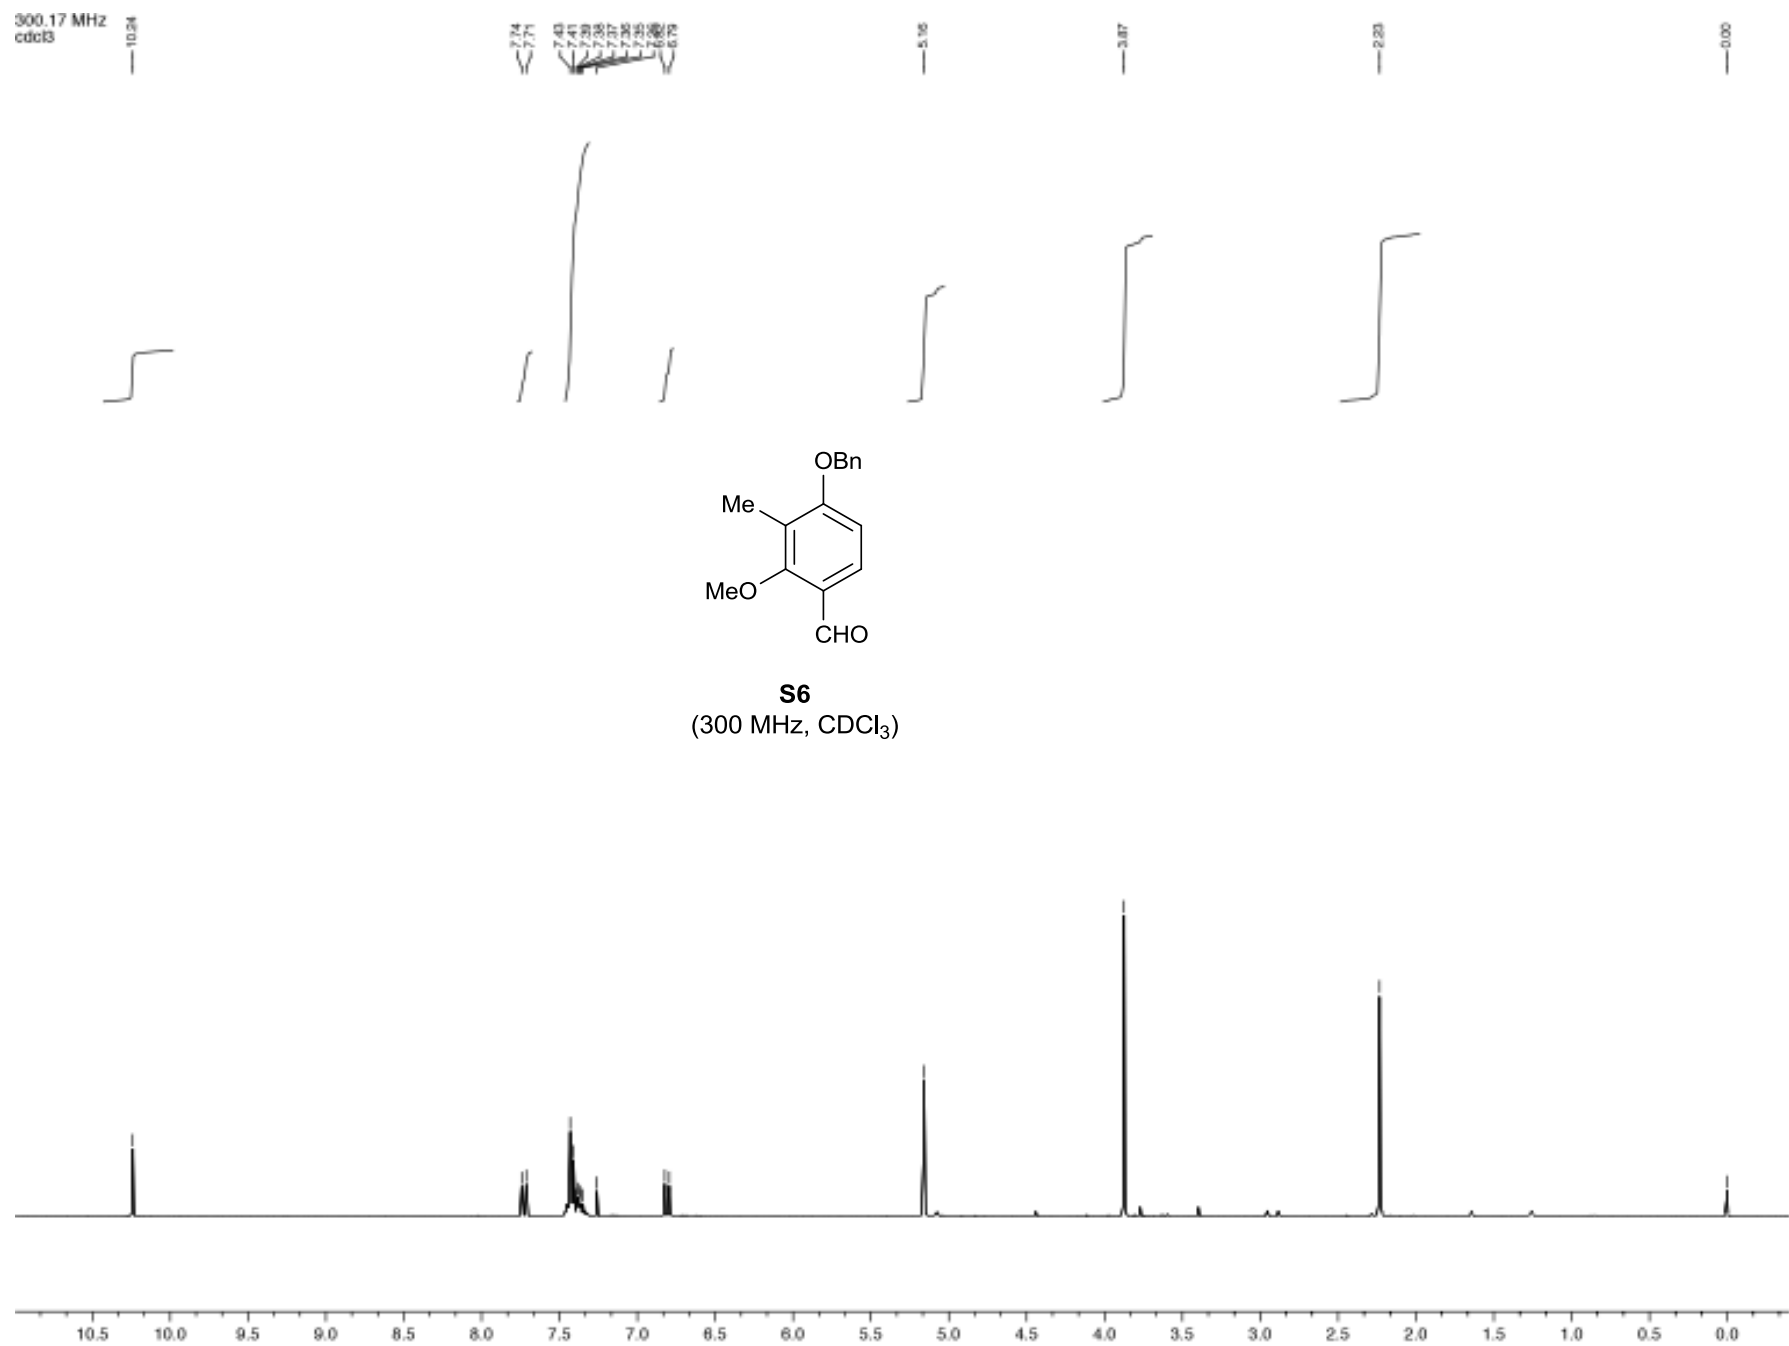

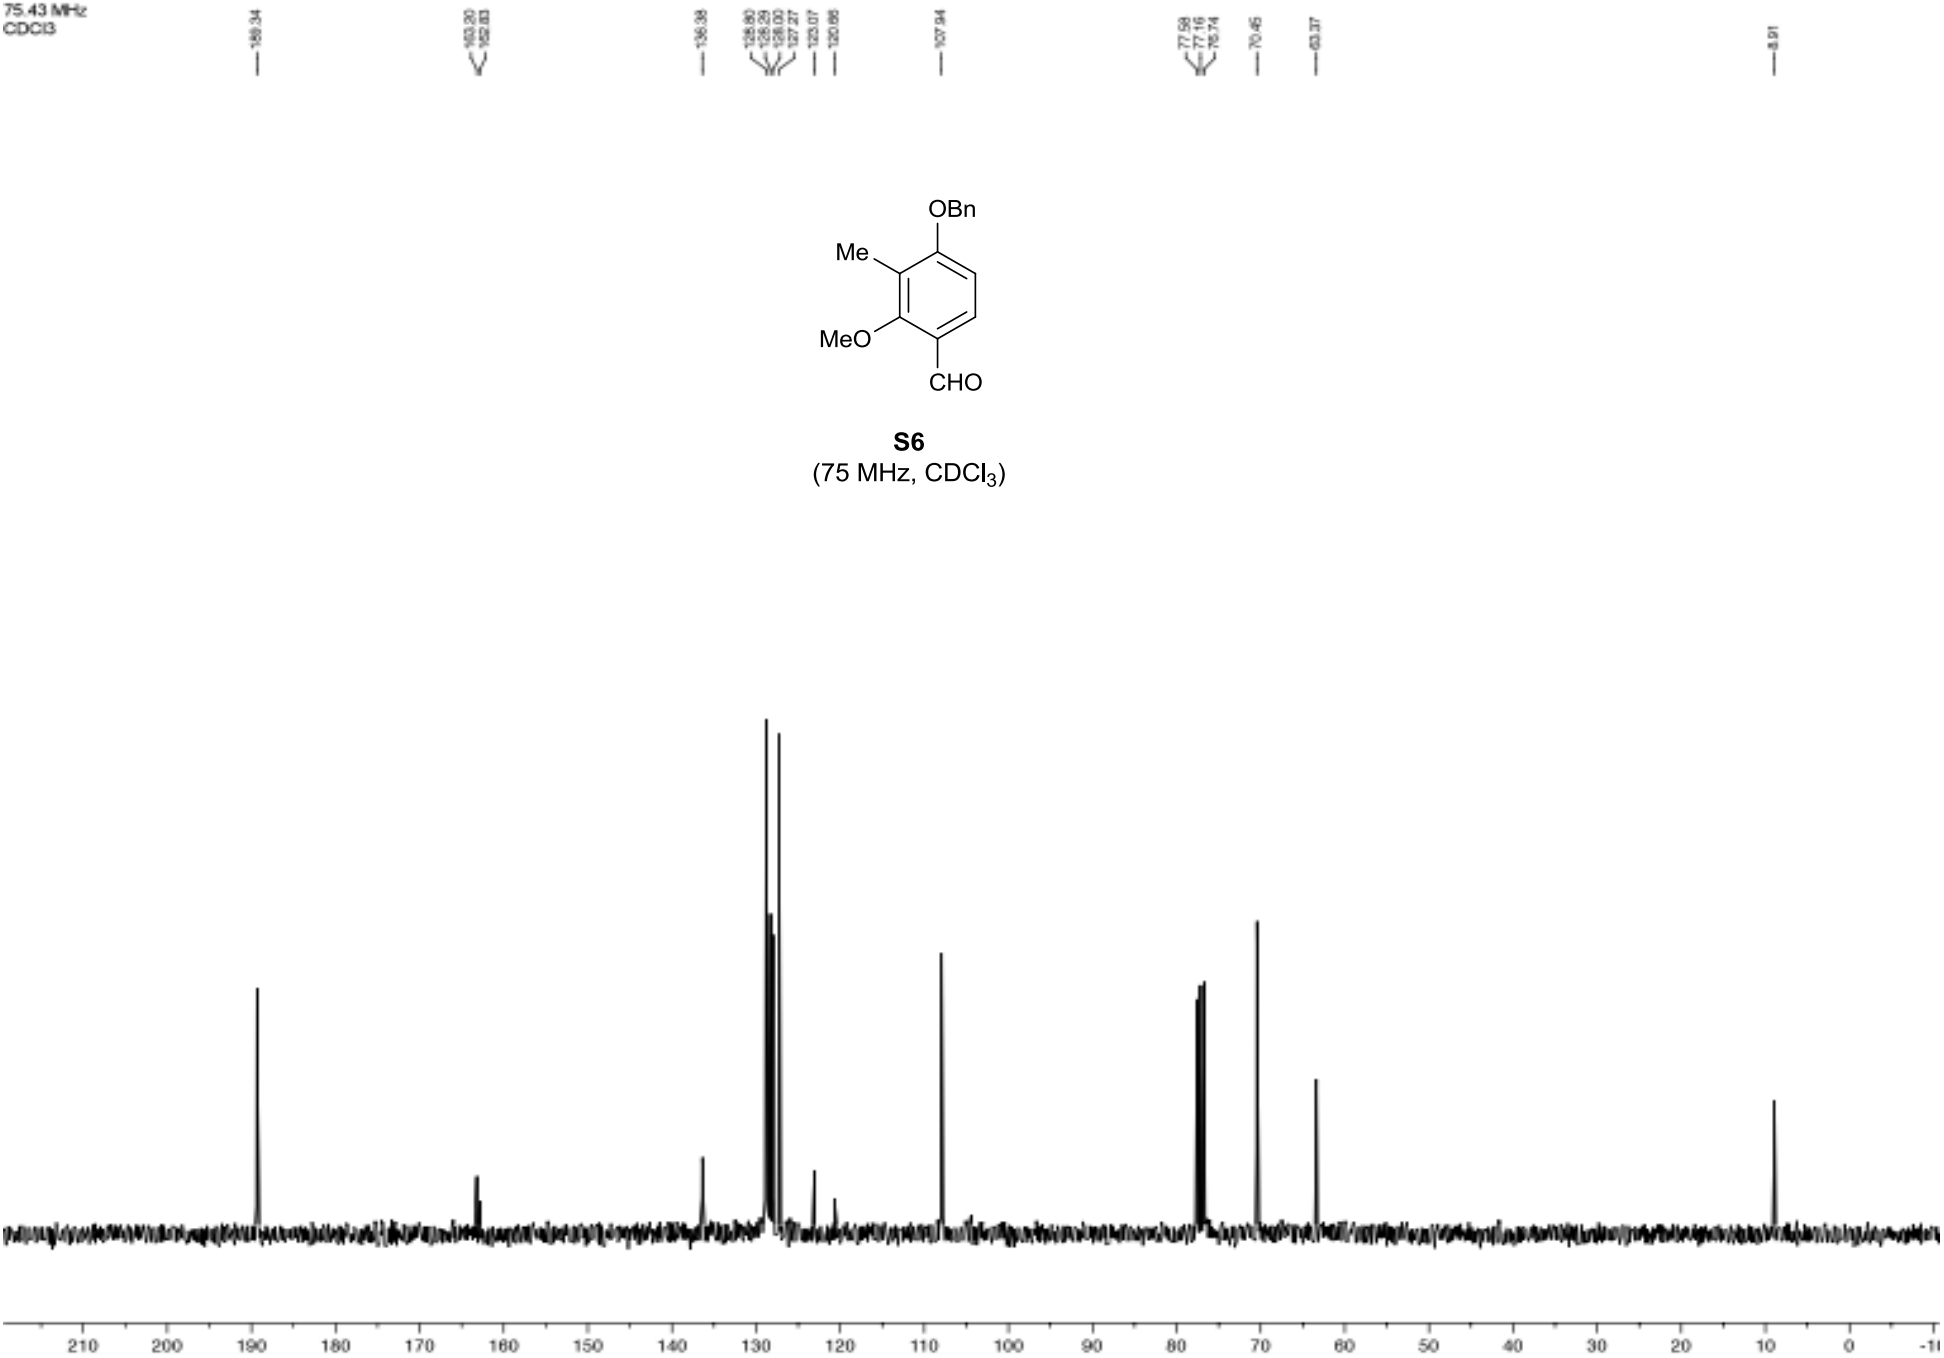

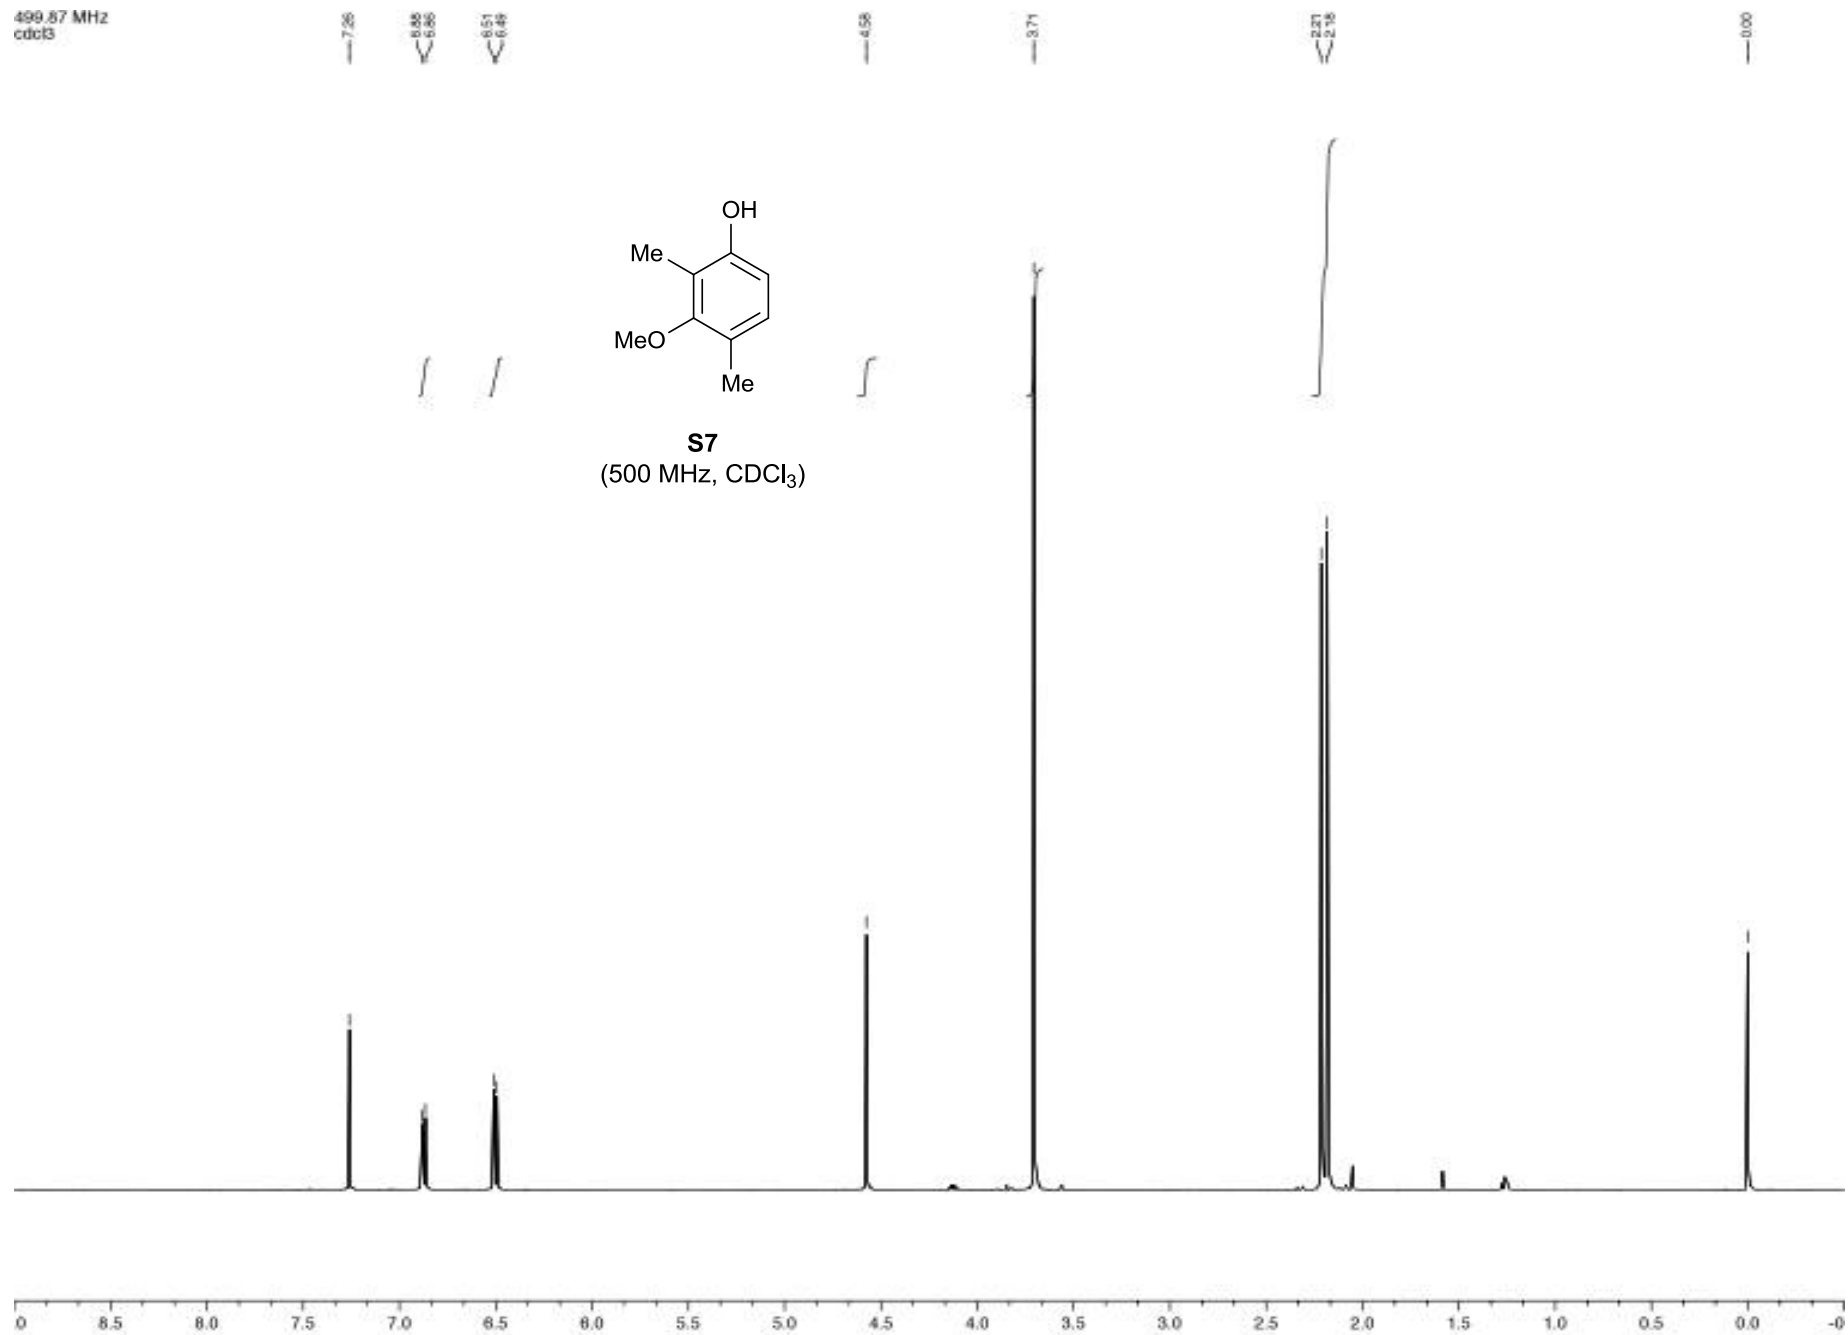

75.43 MHz  
CDCl<sub>3</sub>

157.50  
153.01

128.18  
122.88  
117.43  
110.76

77.58  
77.16  
76.74

60.00

15.75  
8.98

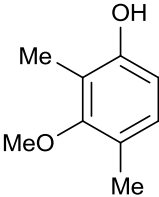

**S7**  
(75 MHz, CDCl<sub>3</sub>)

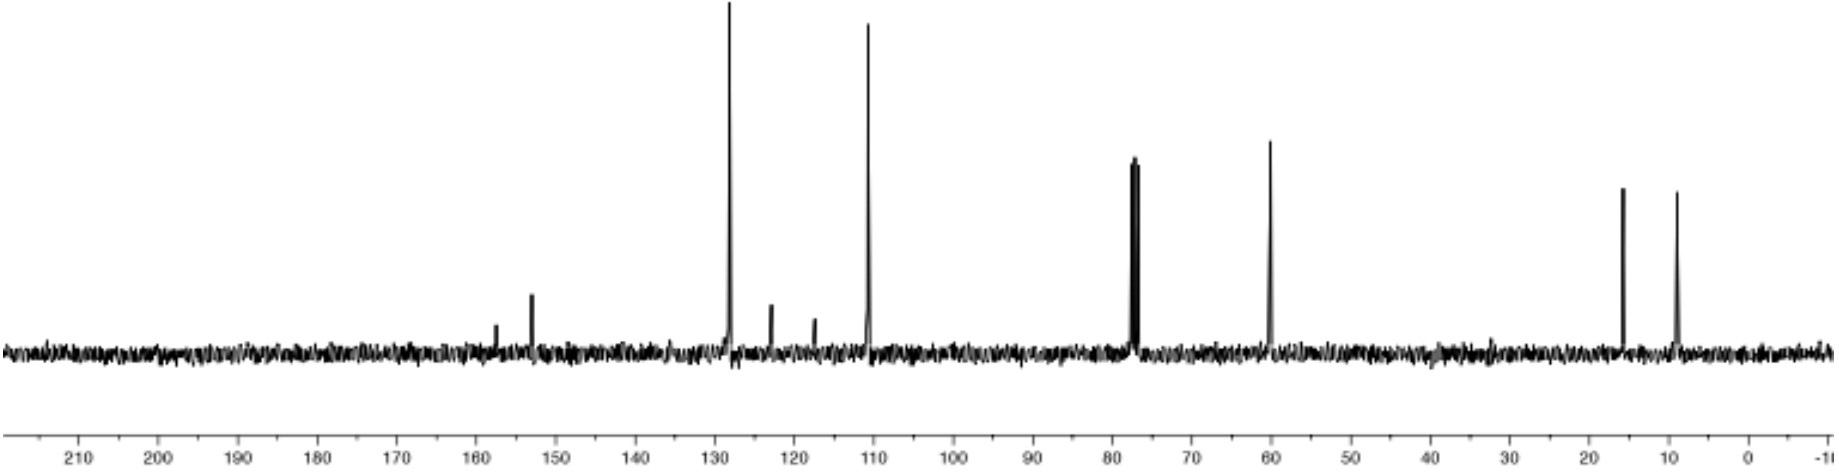

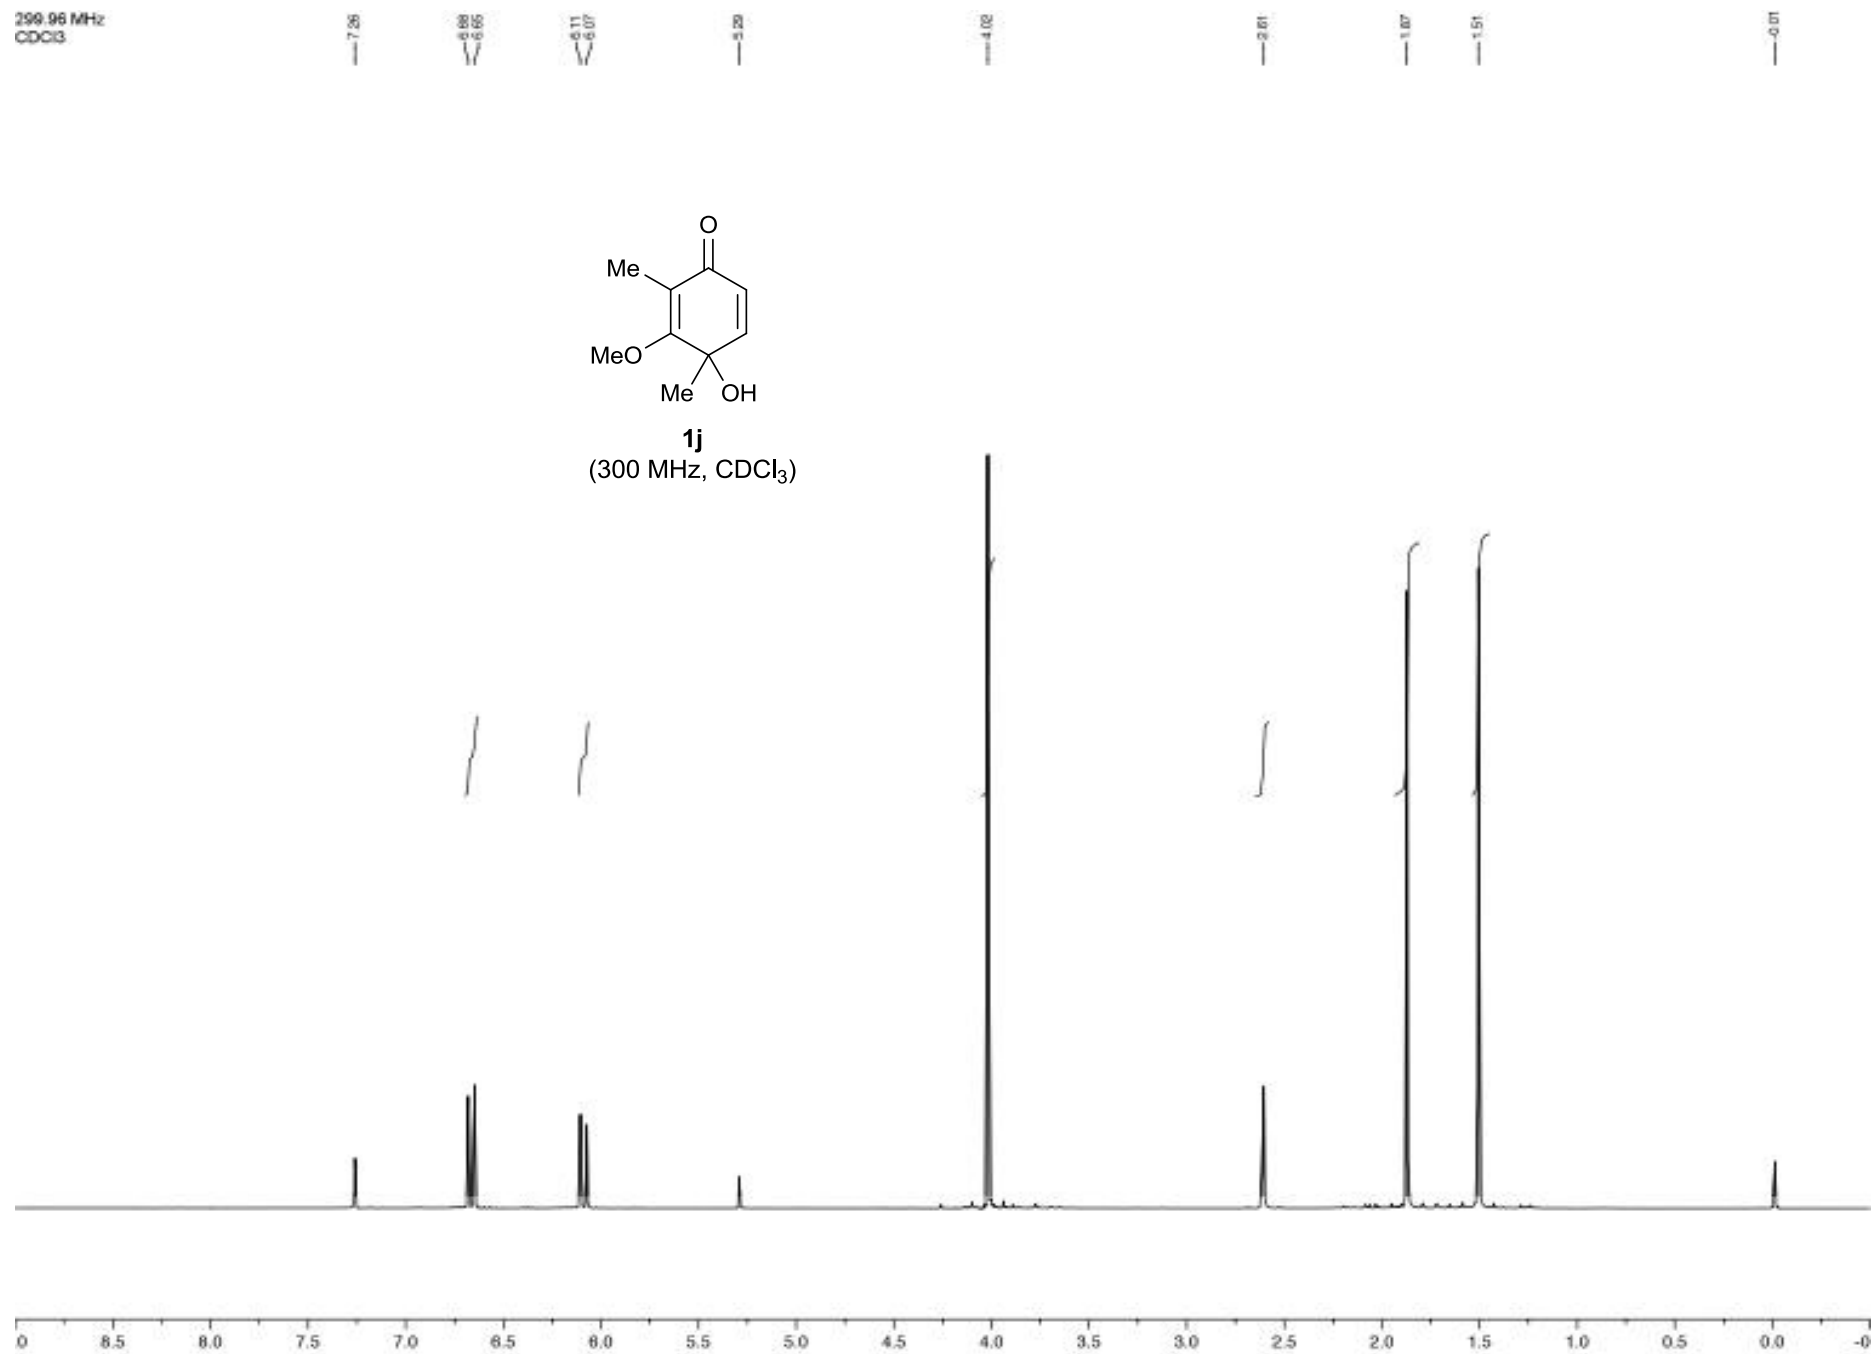

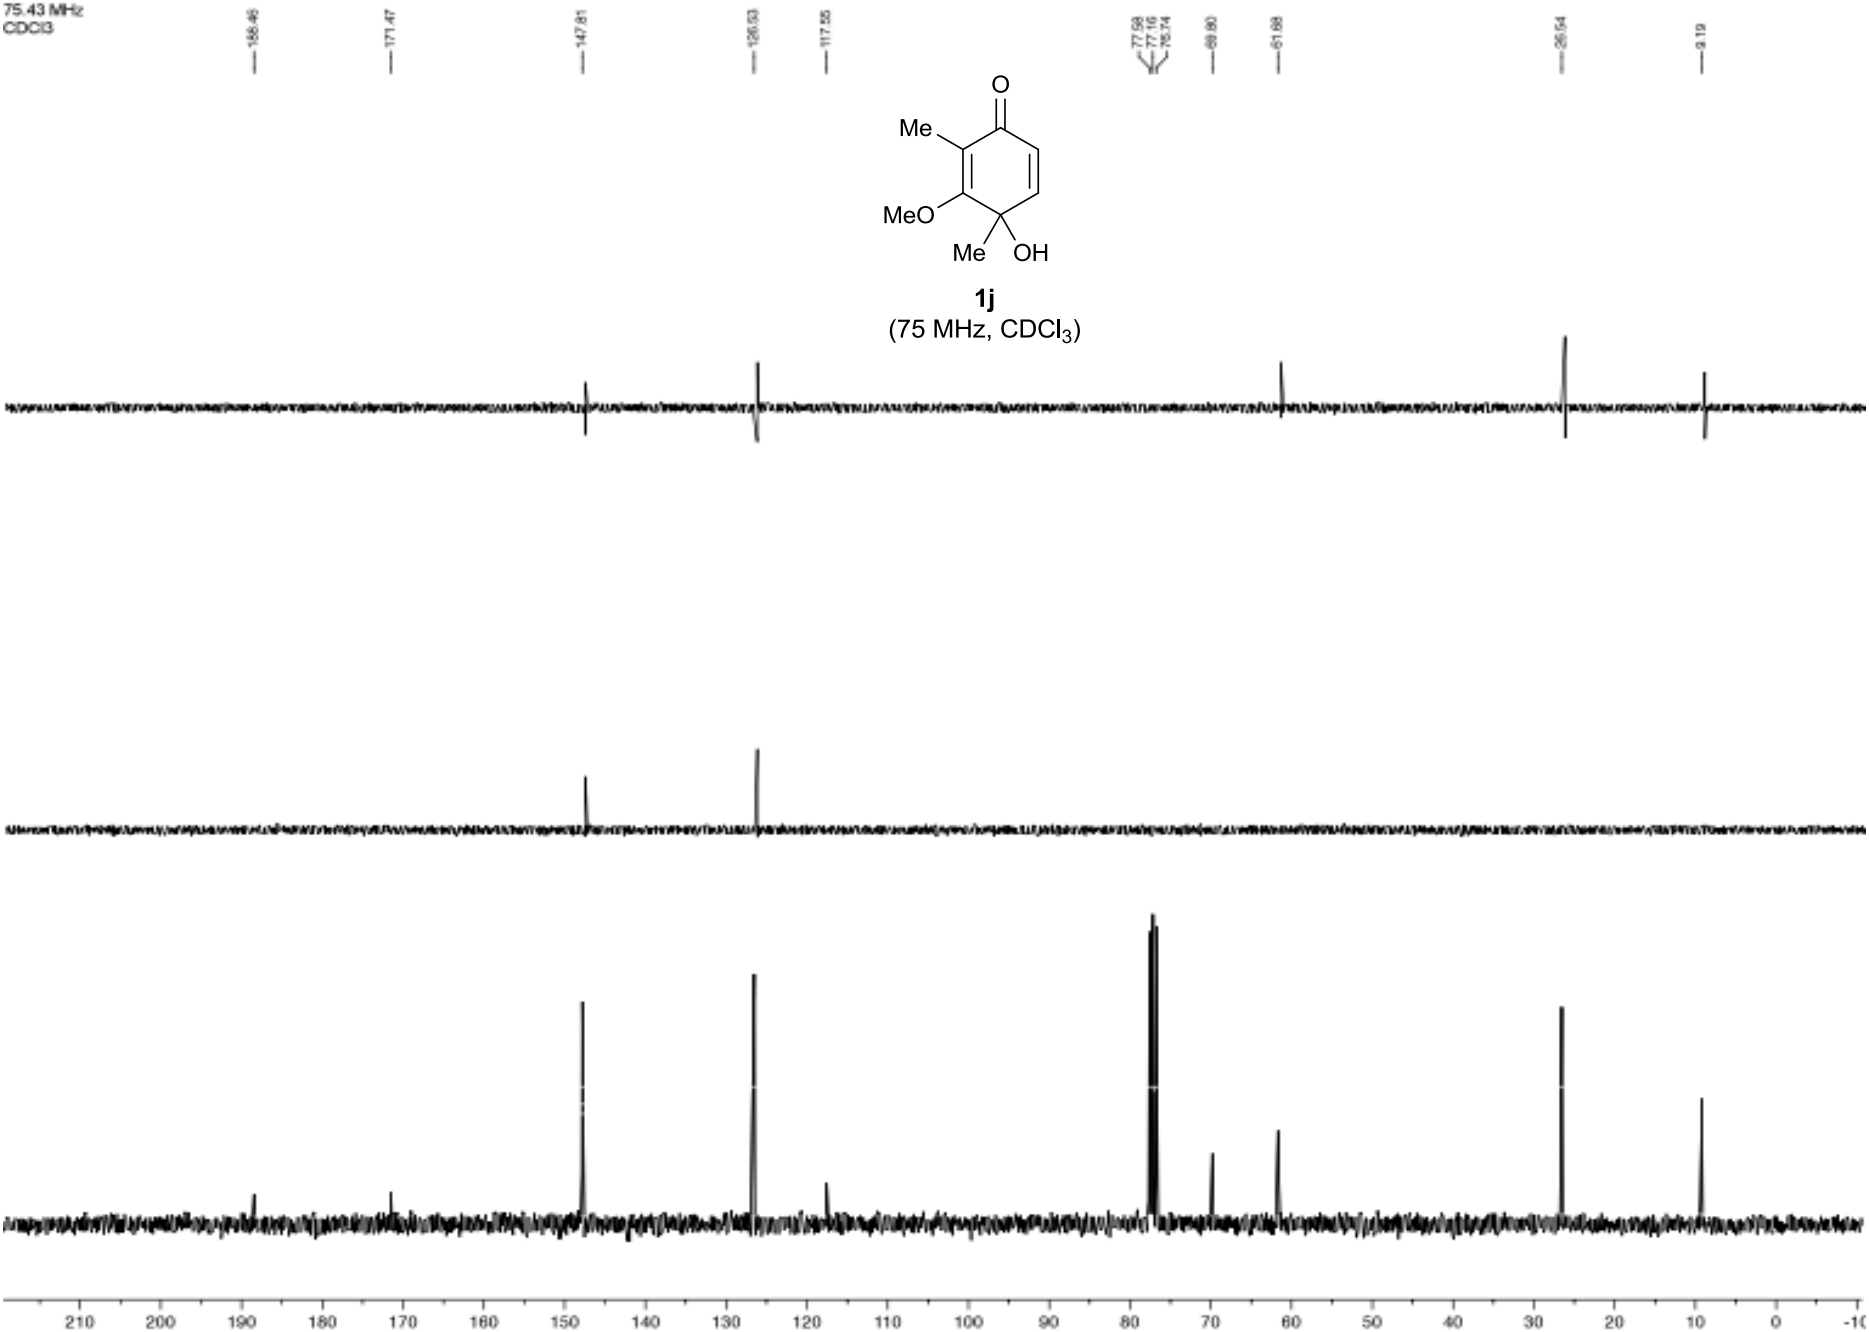



300.17 MHz  
cdcl3

7.26

6.63

6.60

6.24

6.21

3.91

3.29

1.92

1.56

1.48

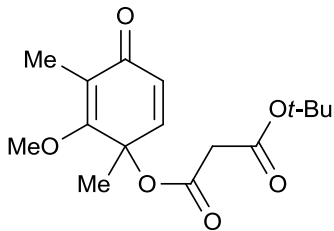

**4j**  
(300 MHz, CDCl<sub>3</sub>)

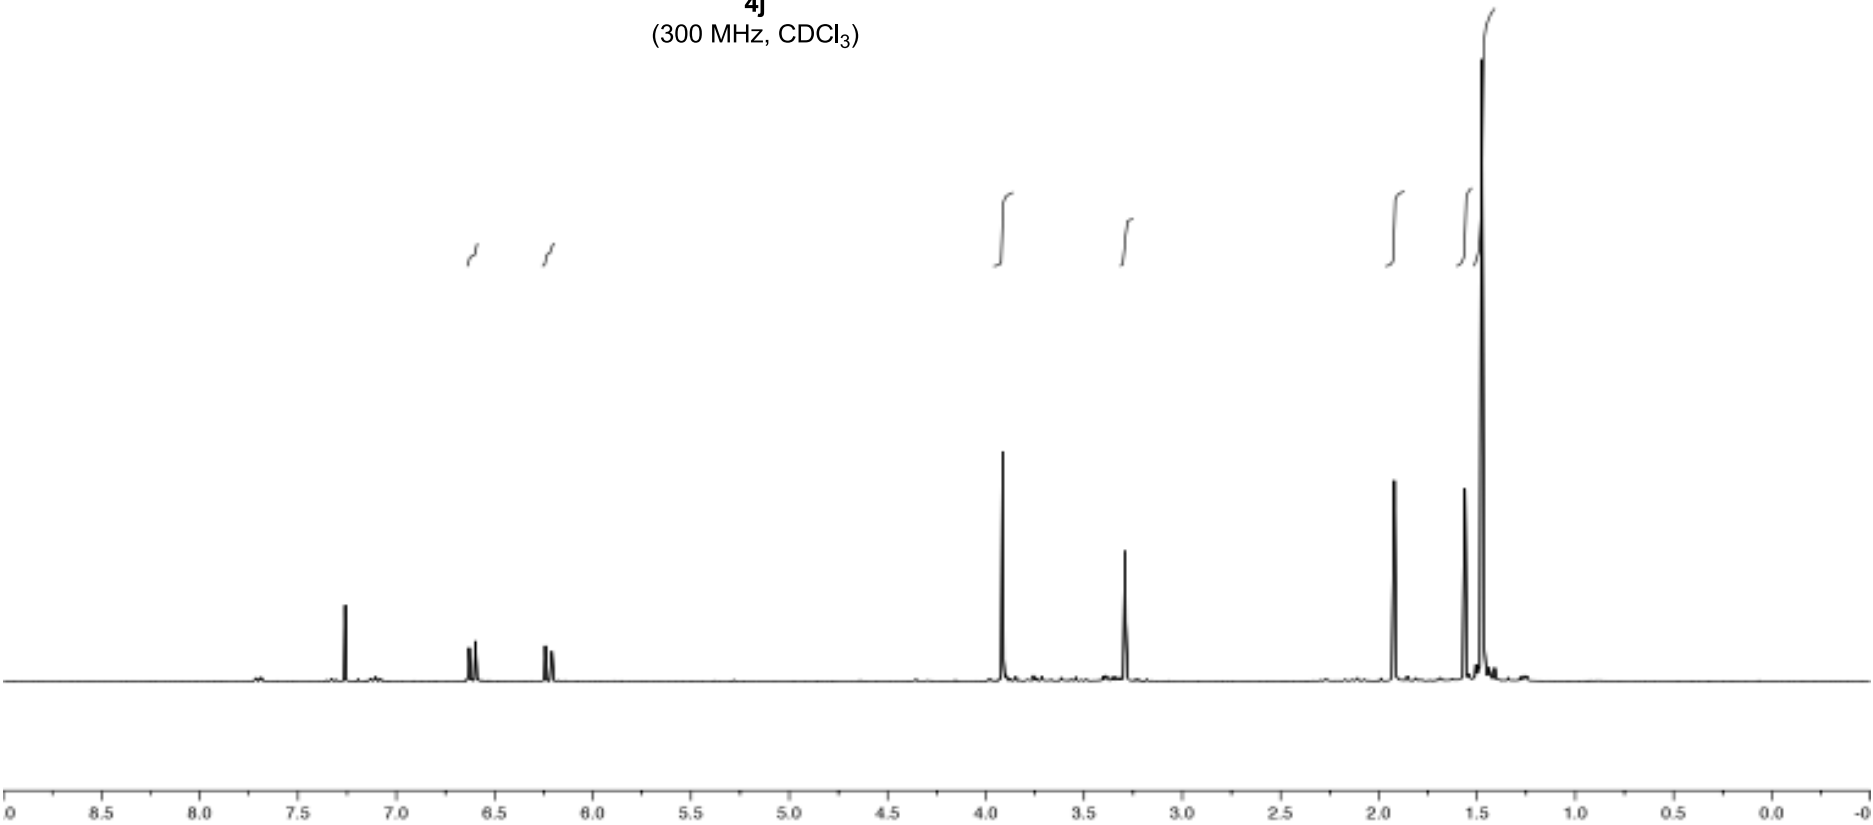

75.43 MHz  
CDCl<sub>3</sub>

187.67

170.10

165.40

165.36

144.37

128.05

118.15

82.40

77.48

77.16

76.74

76.61

61.50

43.05

28.05

25.43

0.98

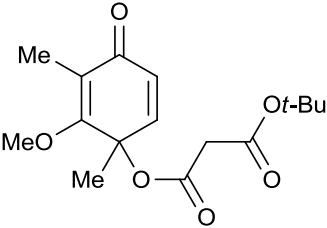

**4j**  
(75 MHz, CDCl<sub>3</sub>)

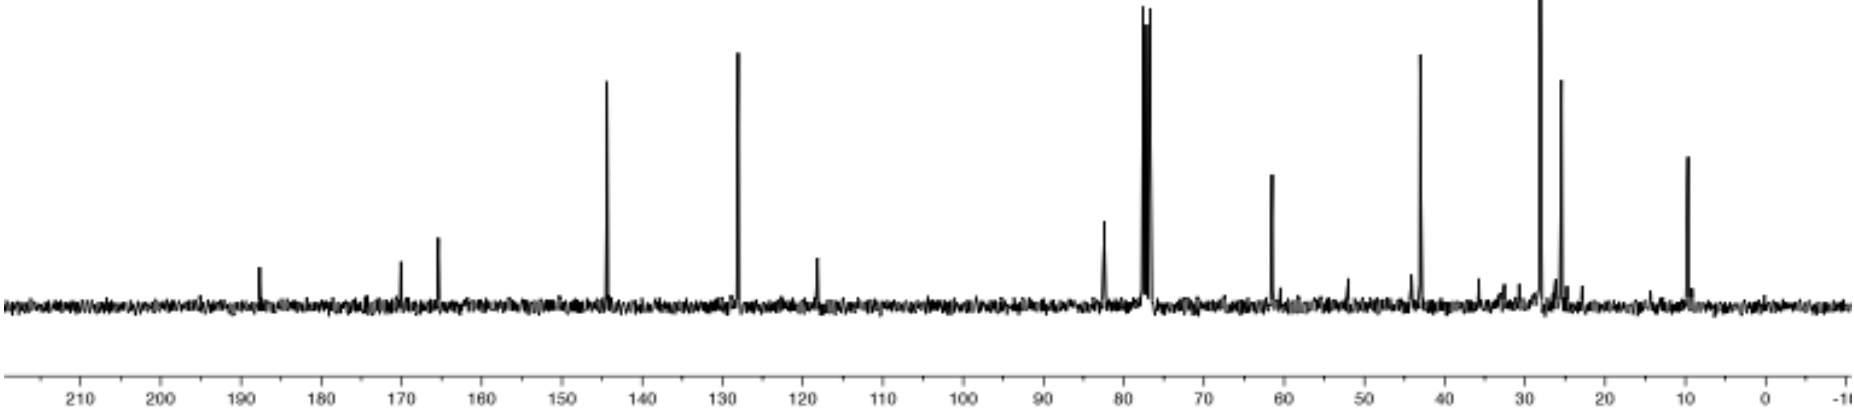

7.260

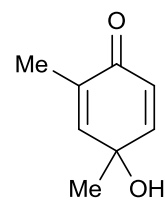

**1k**  
(400 MHz, CDCl<sub>3</sub>)

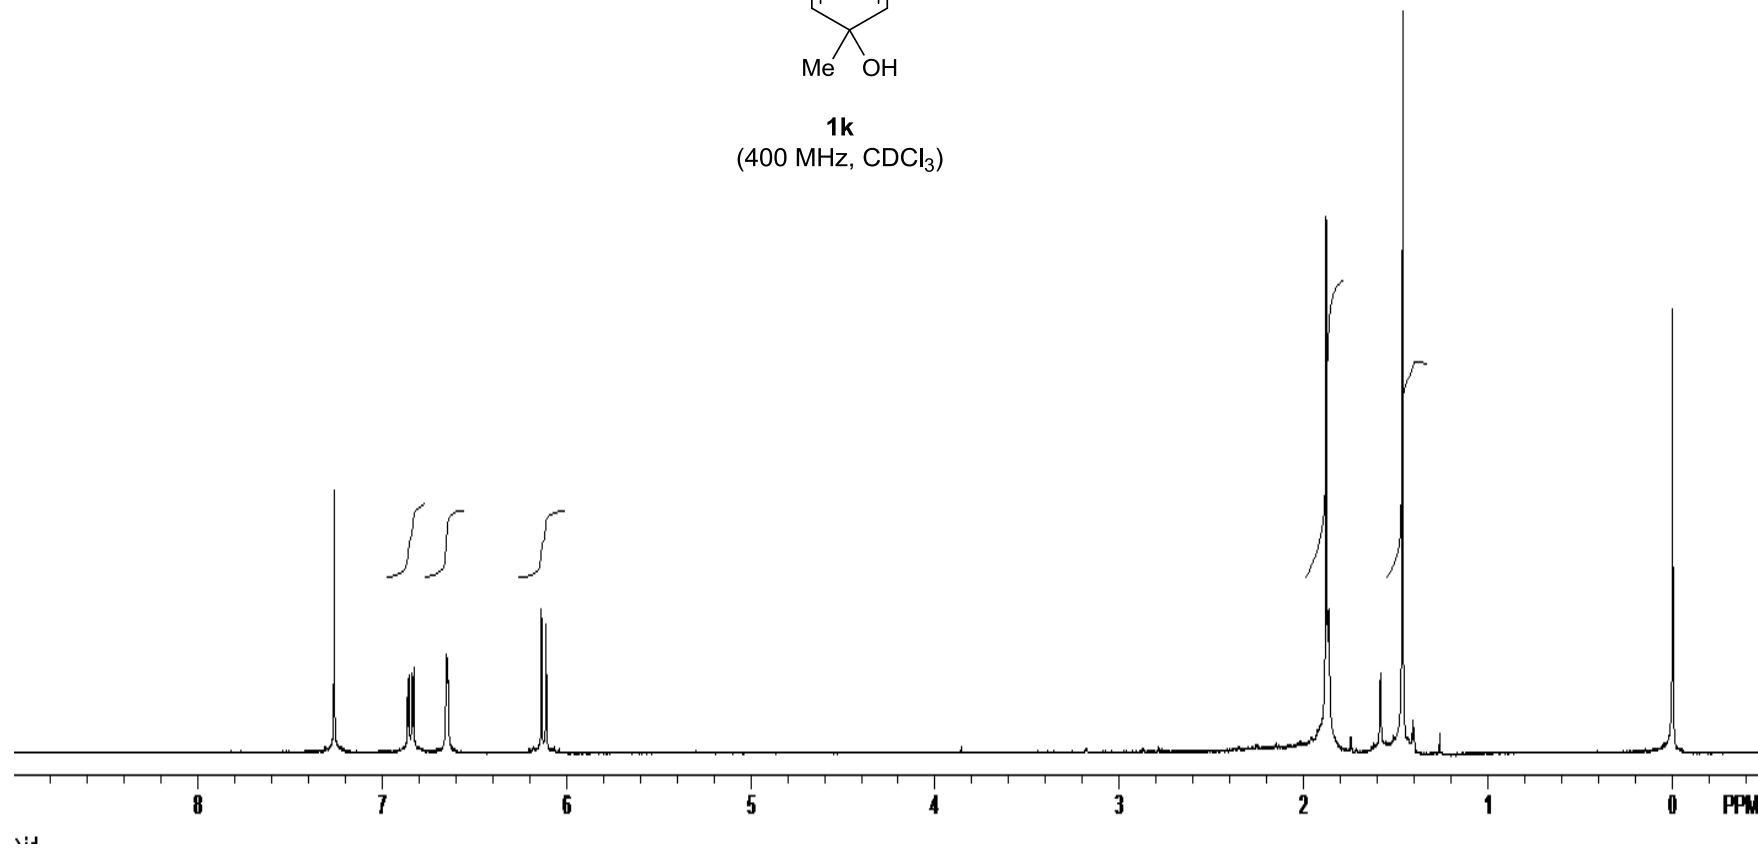

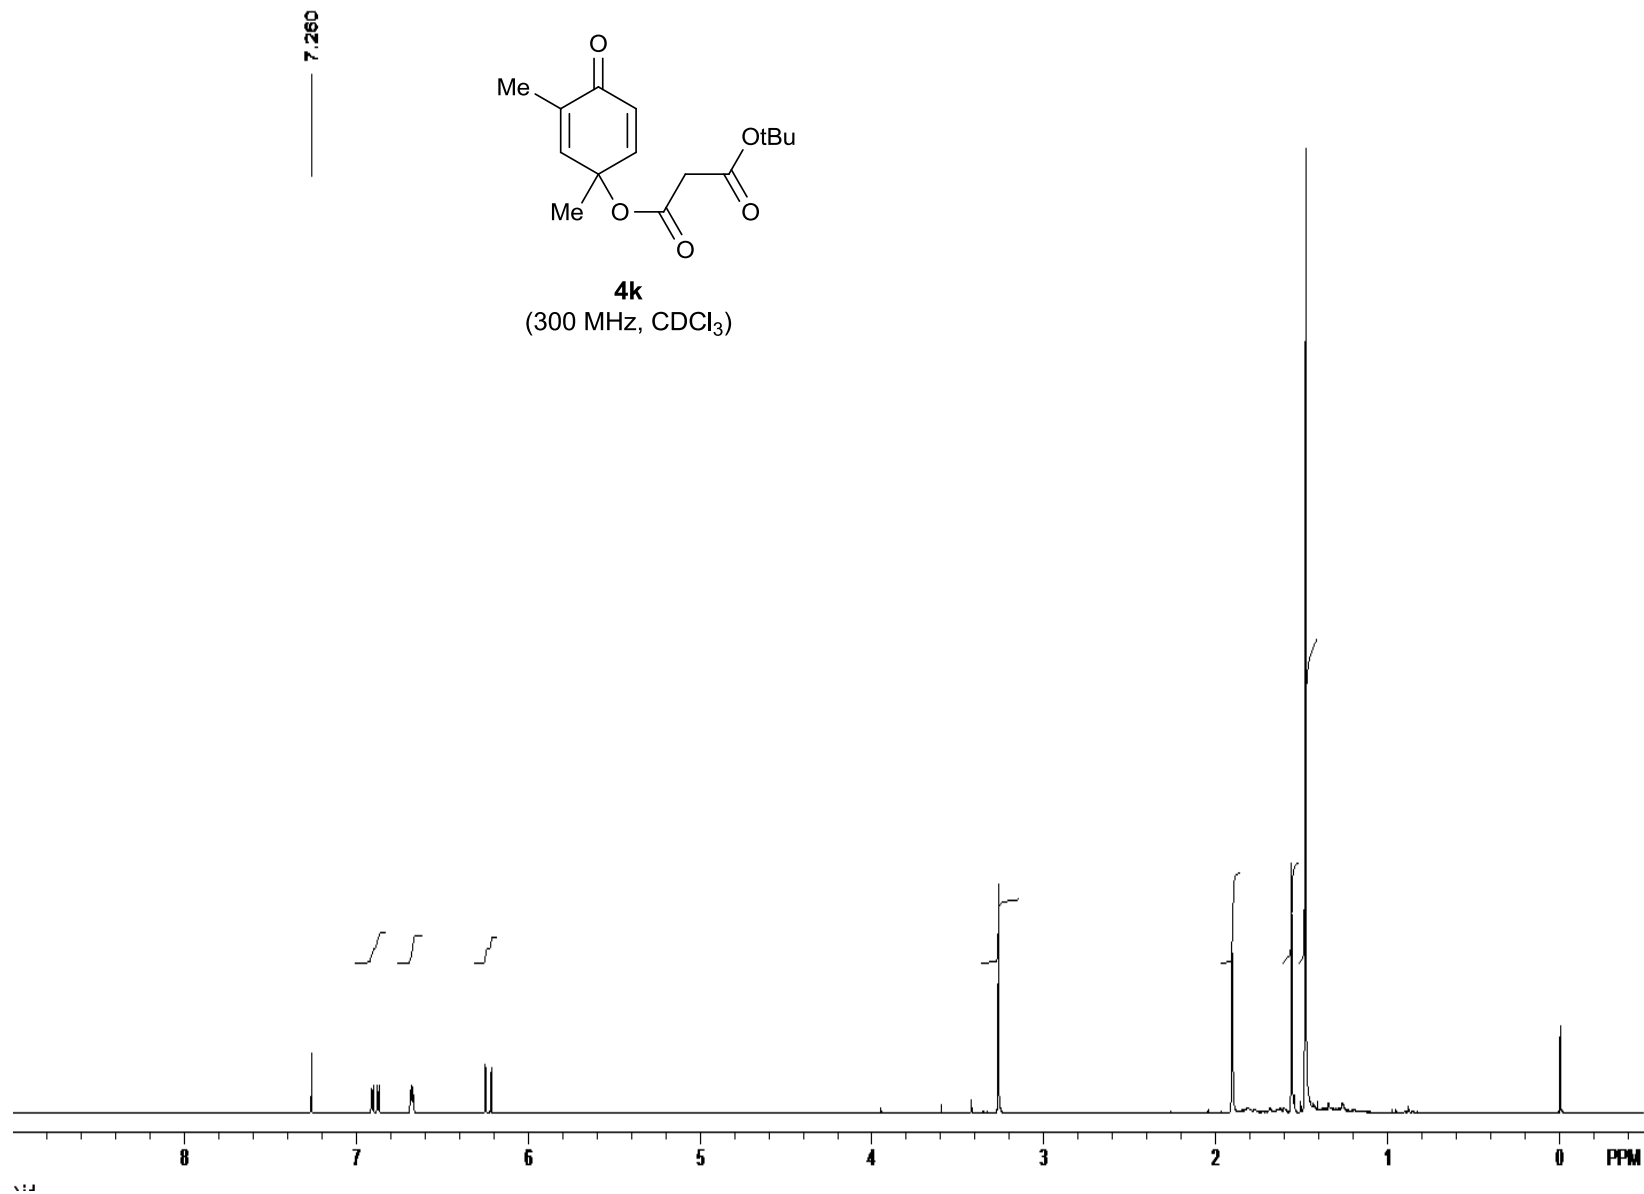

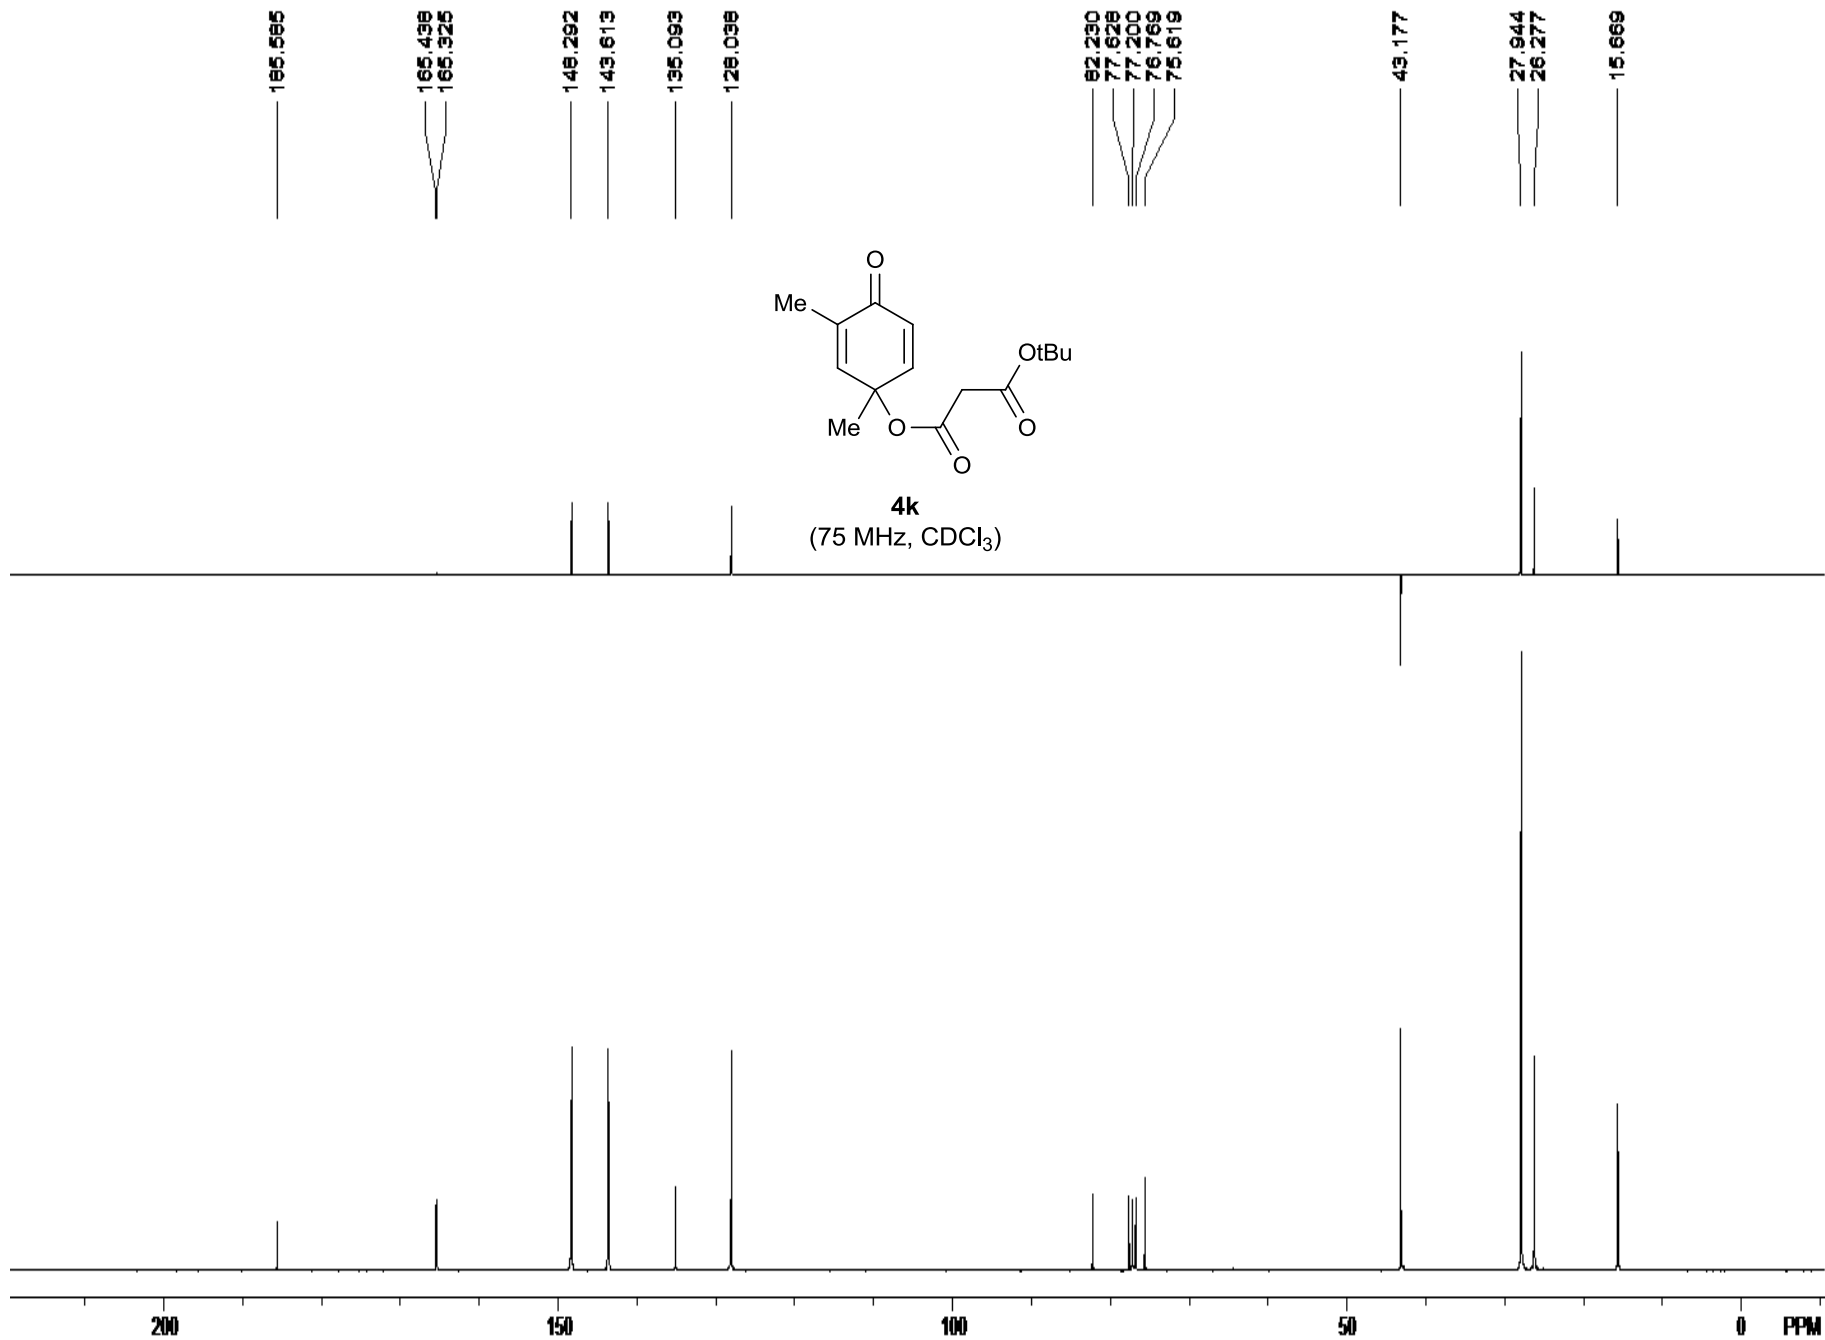

299.98 MHz  
CDCl<sub>3</sub>

7.26

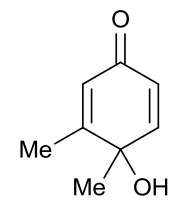

**11**  
(300 MHz, CDCl<sub>3</sub>)

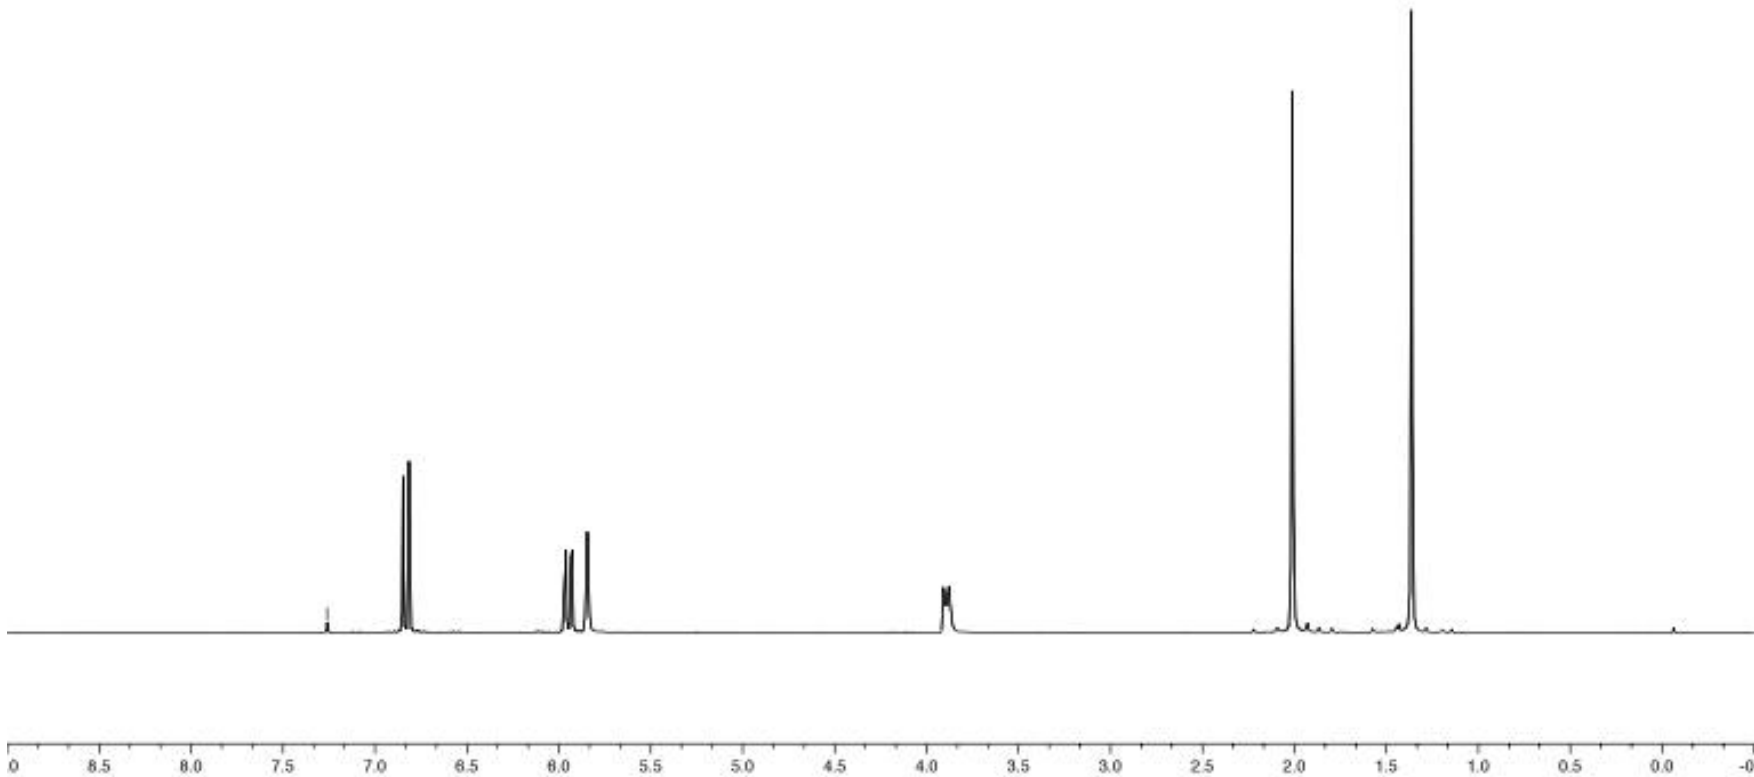

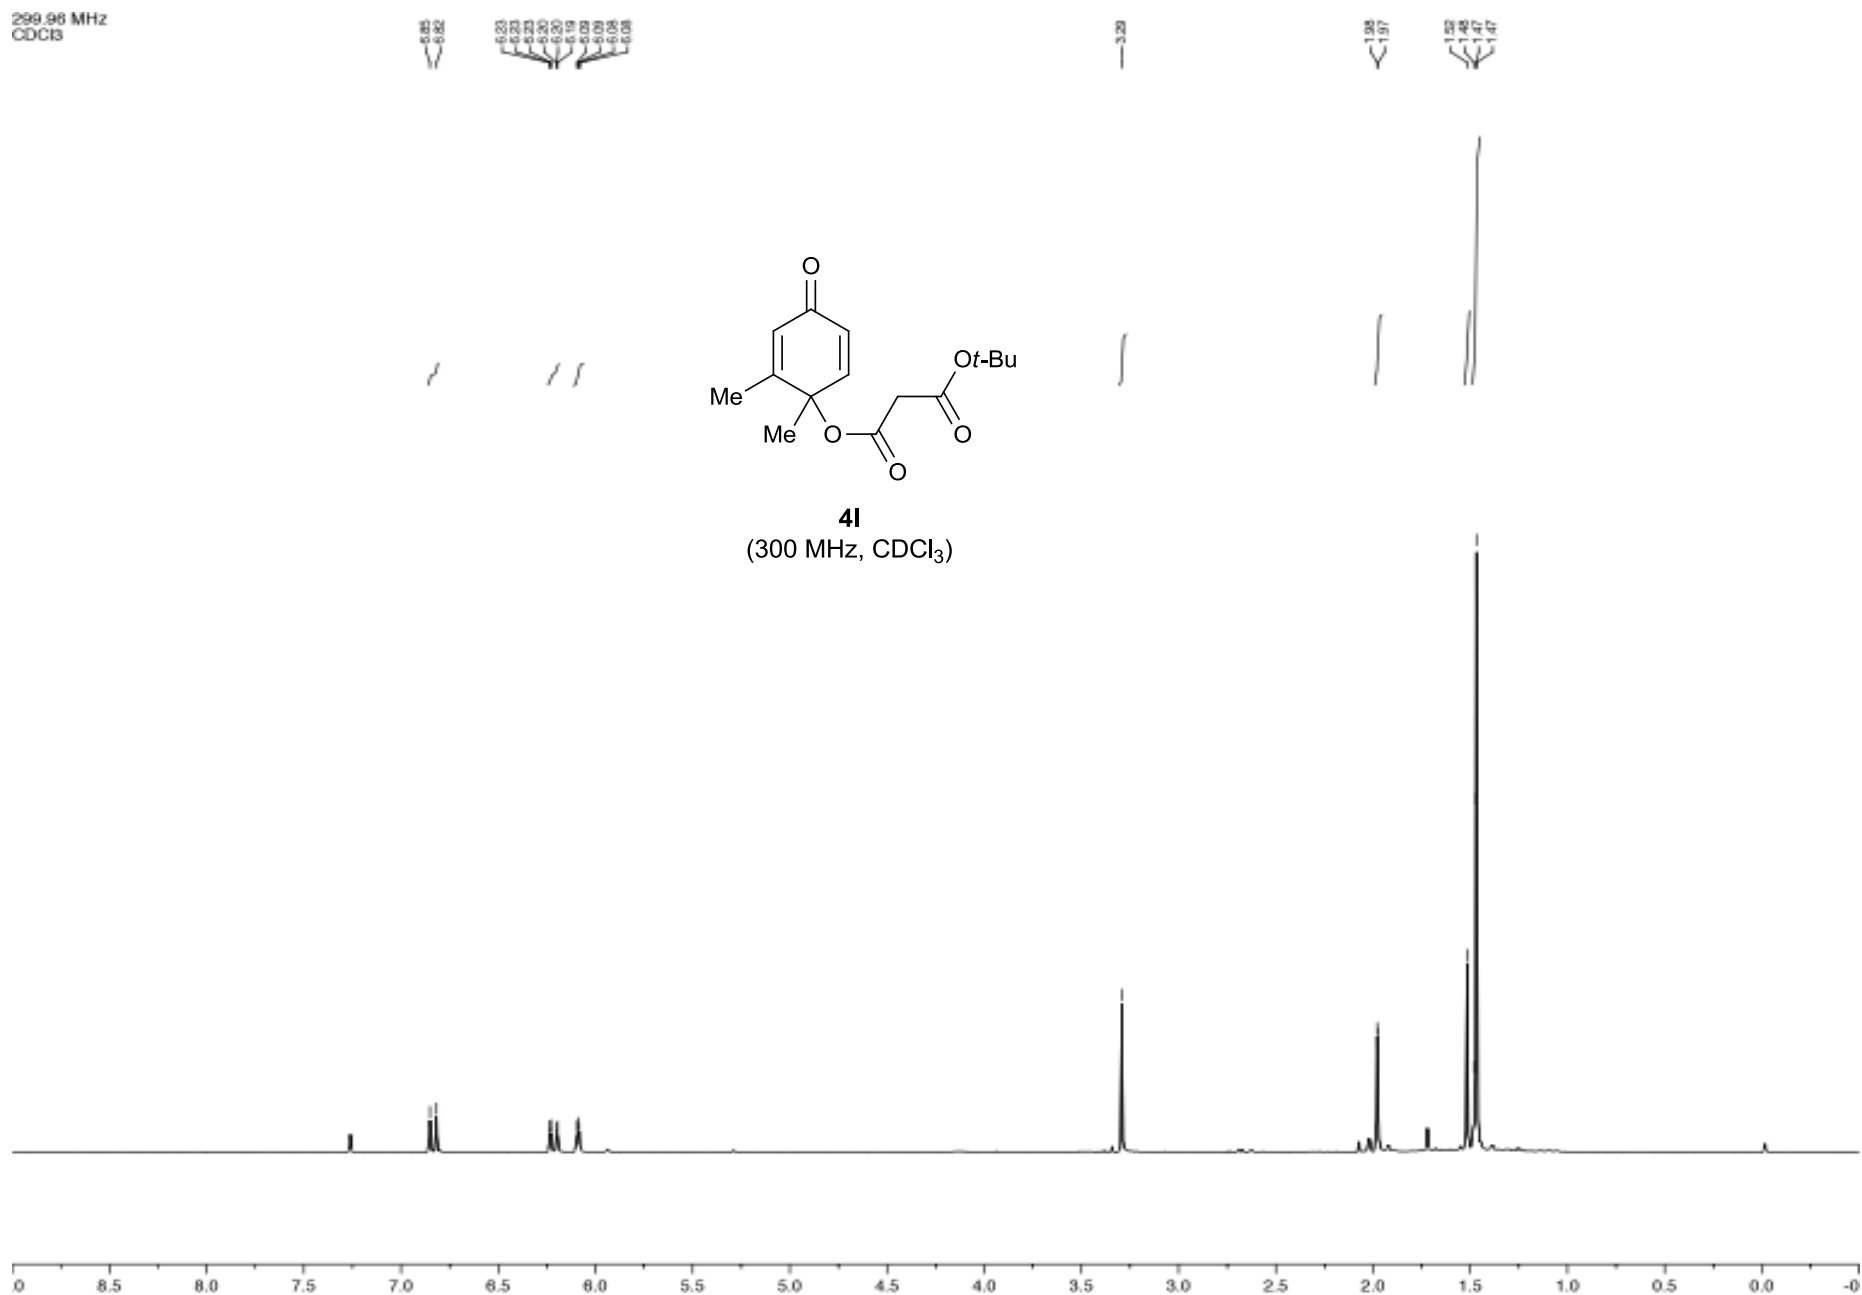

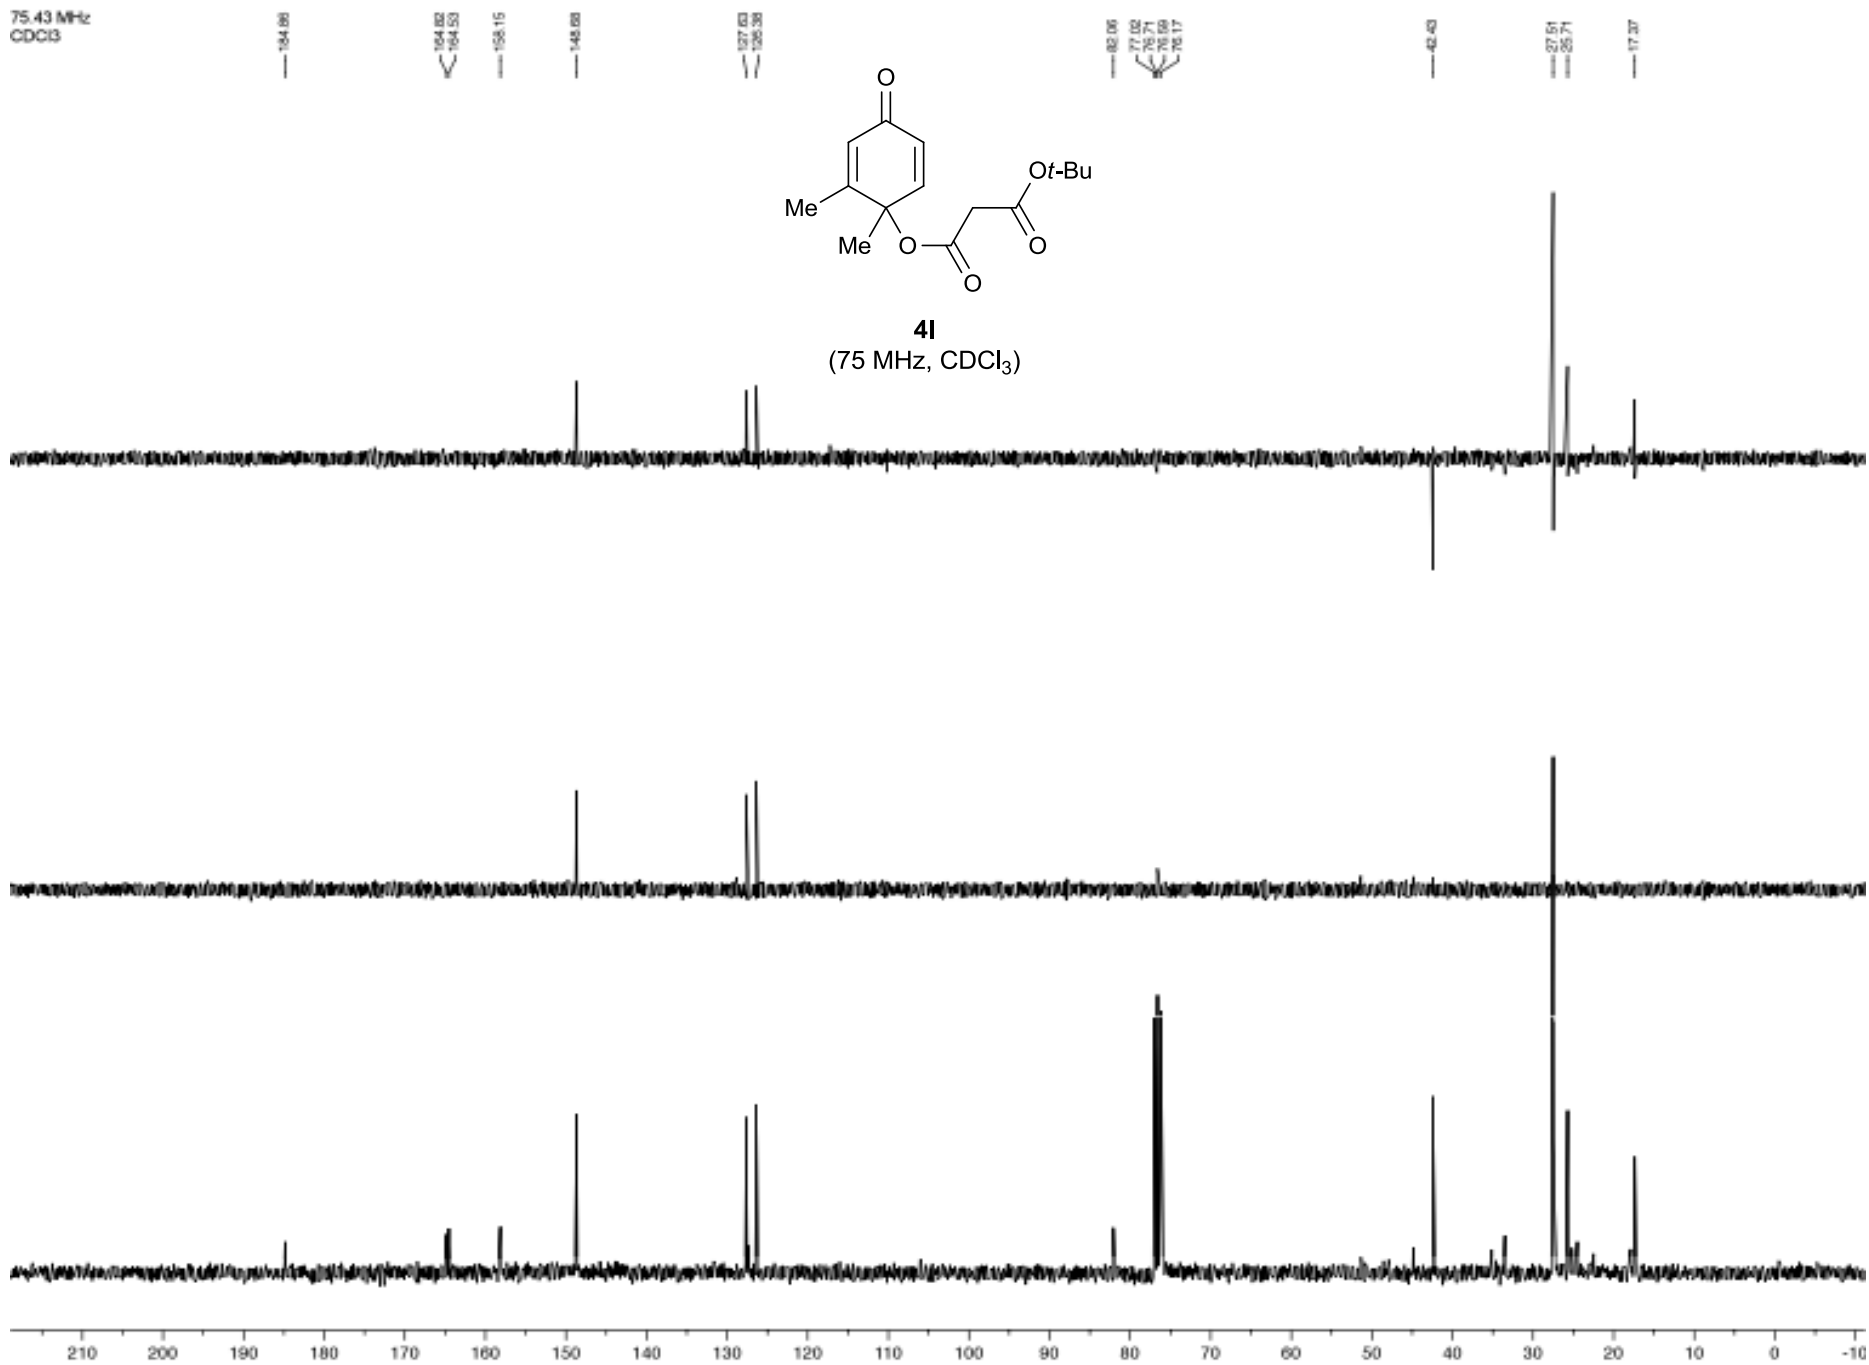



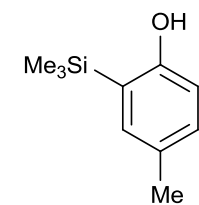

**S8**  
(300 MHz, CDCl<sub>3</sub>)

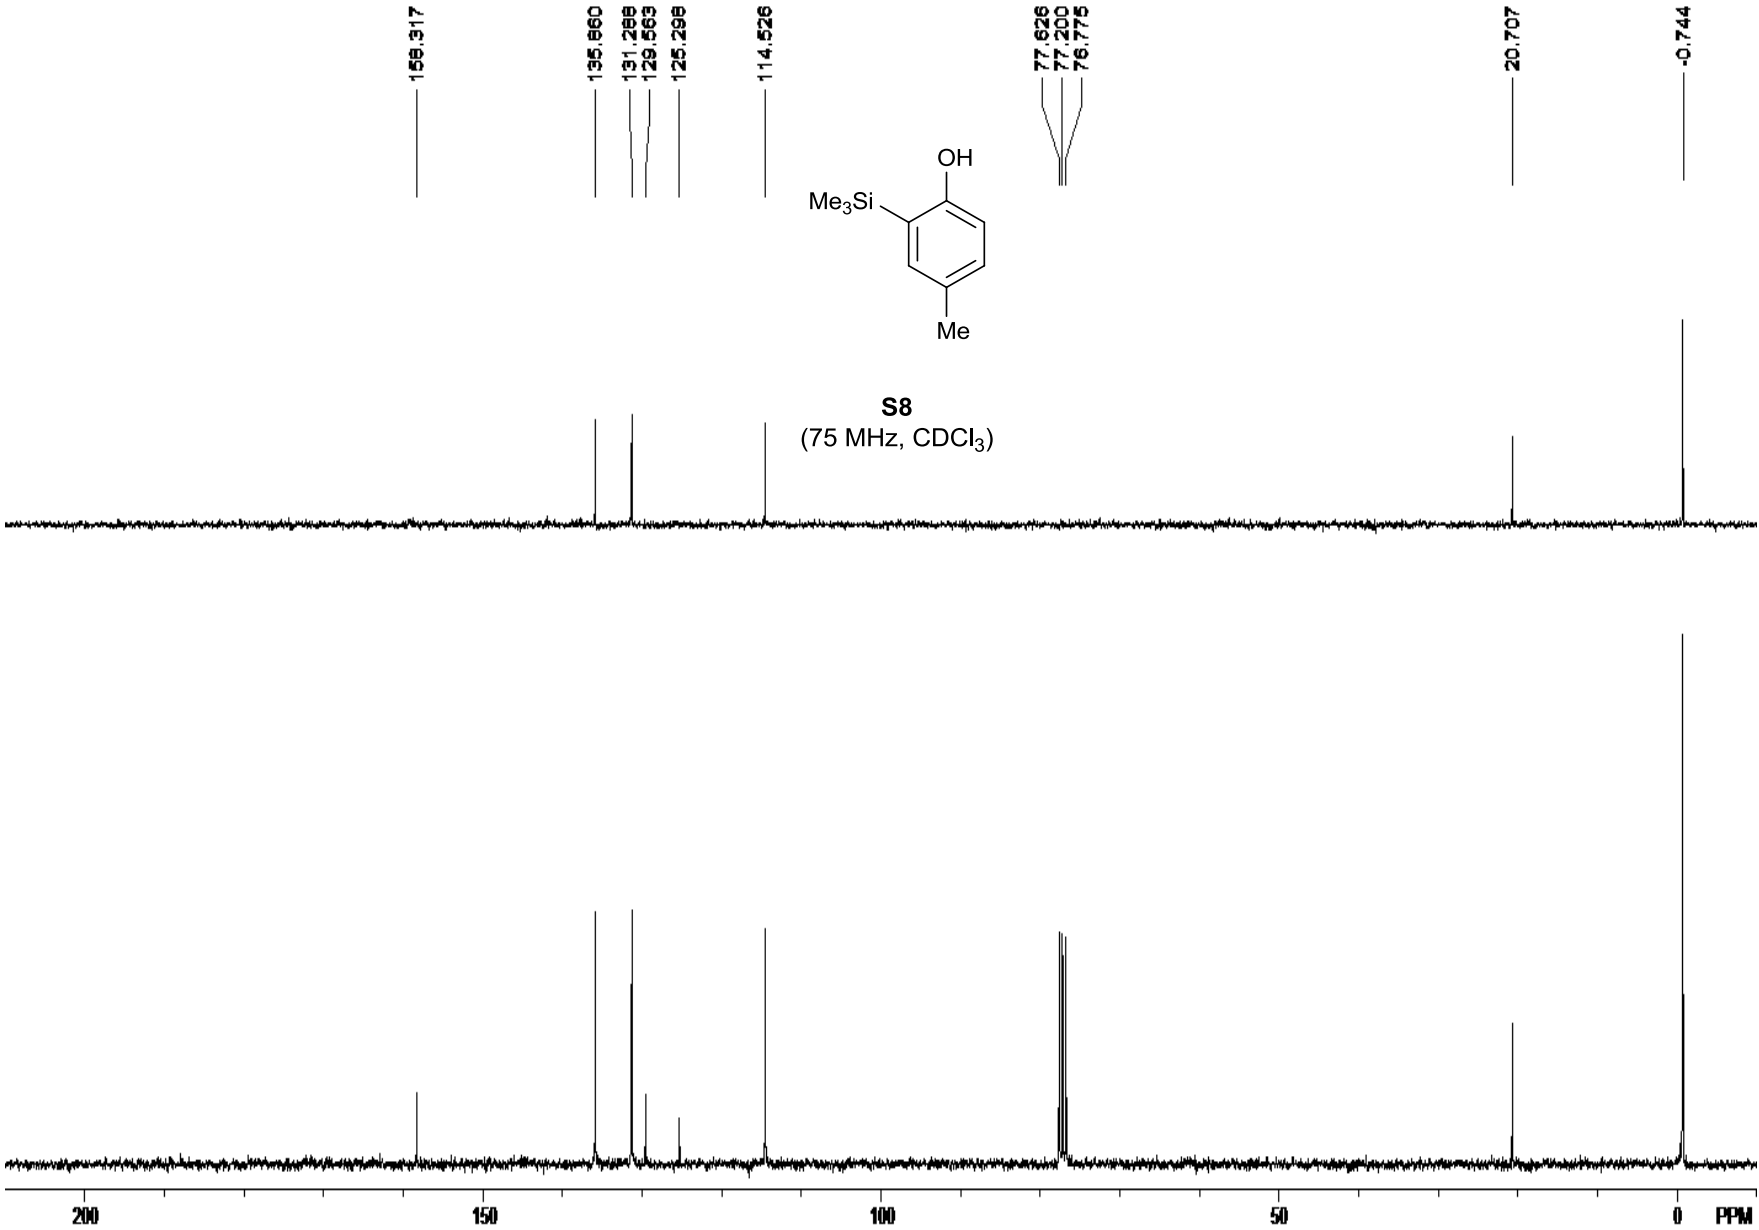

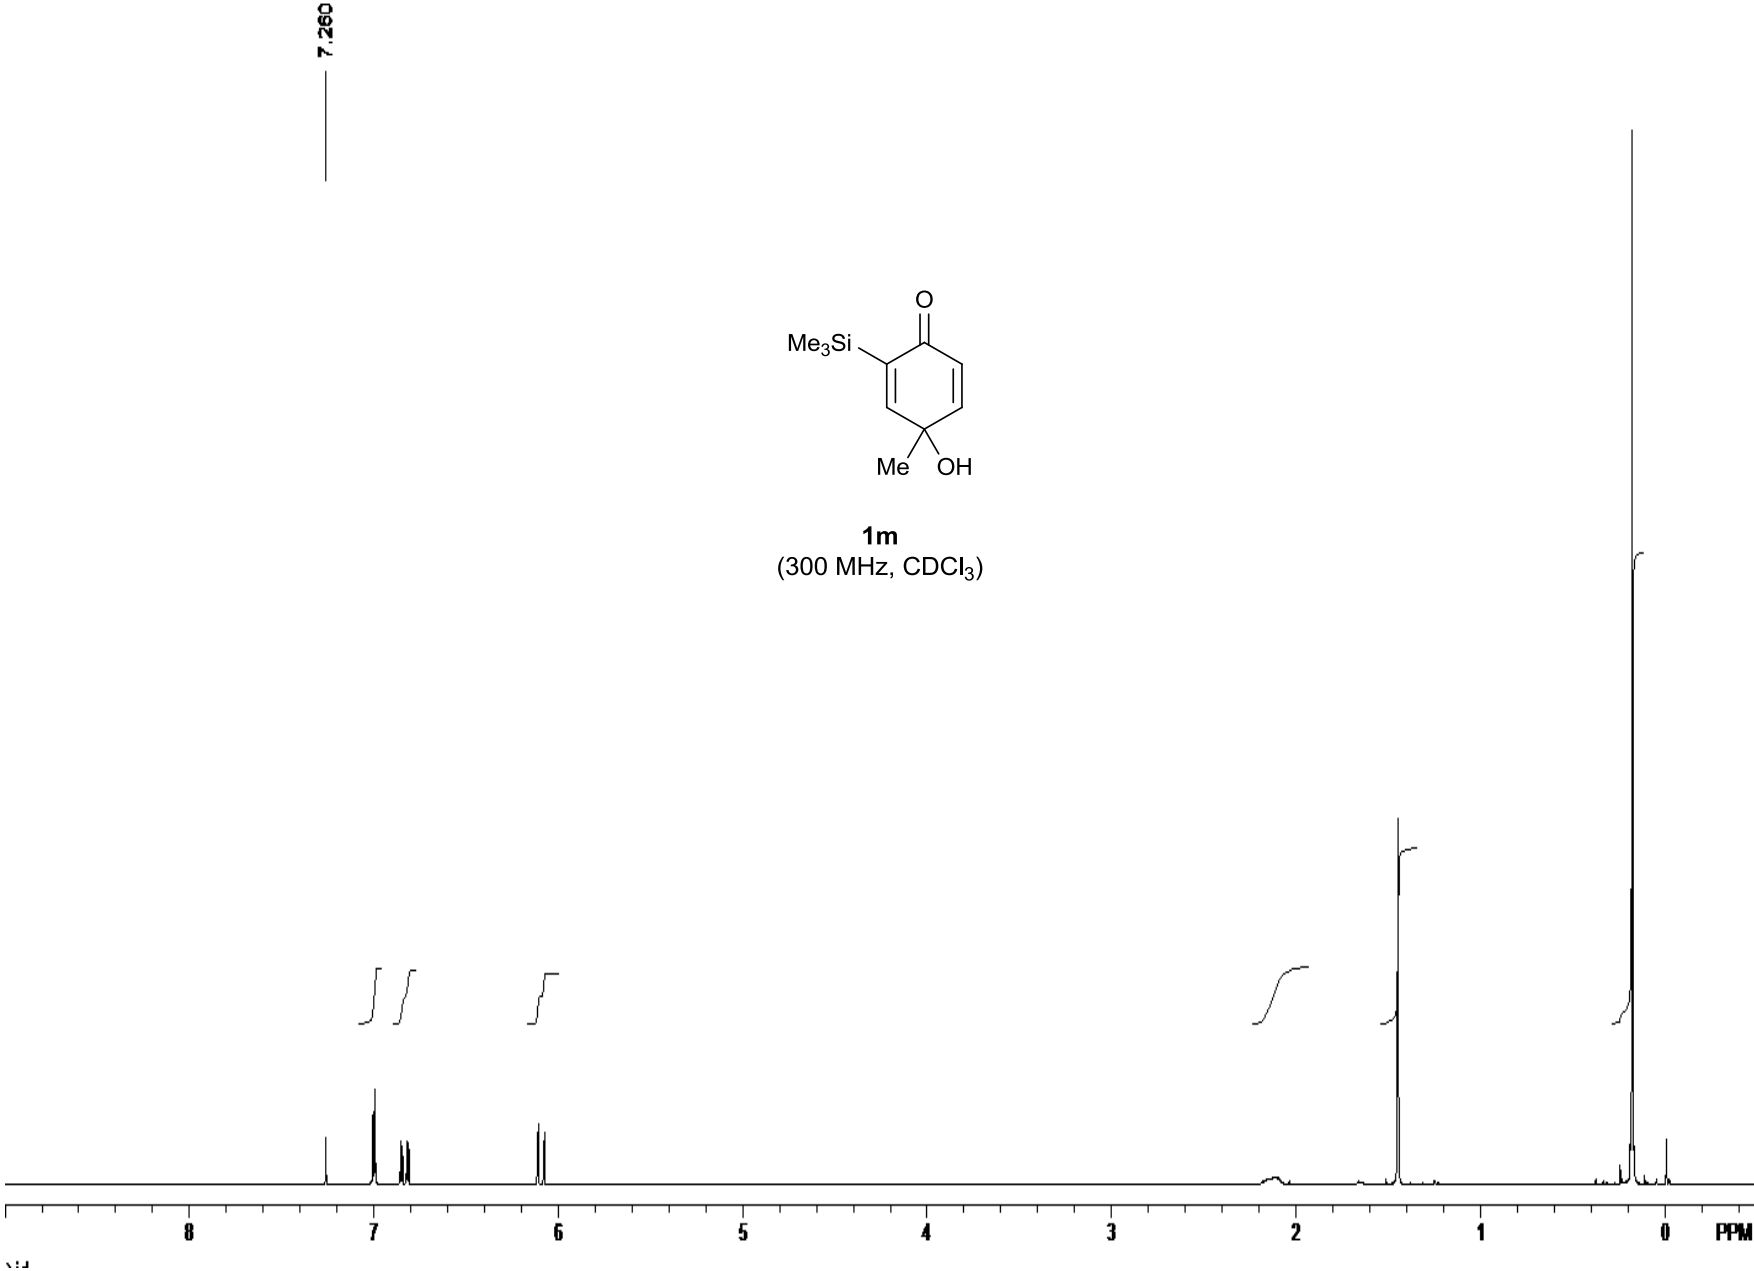

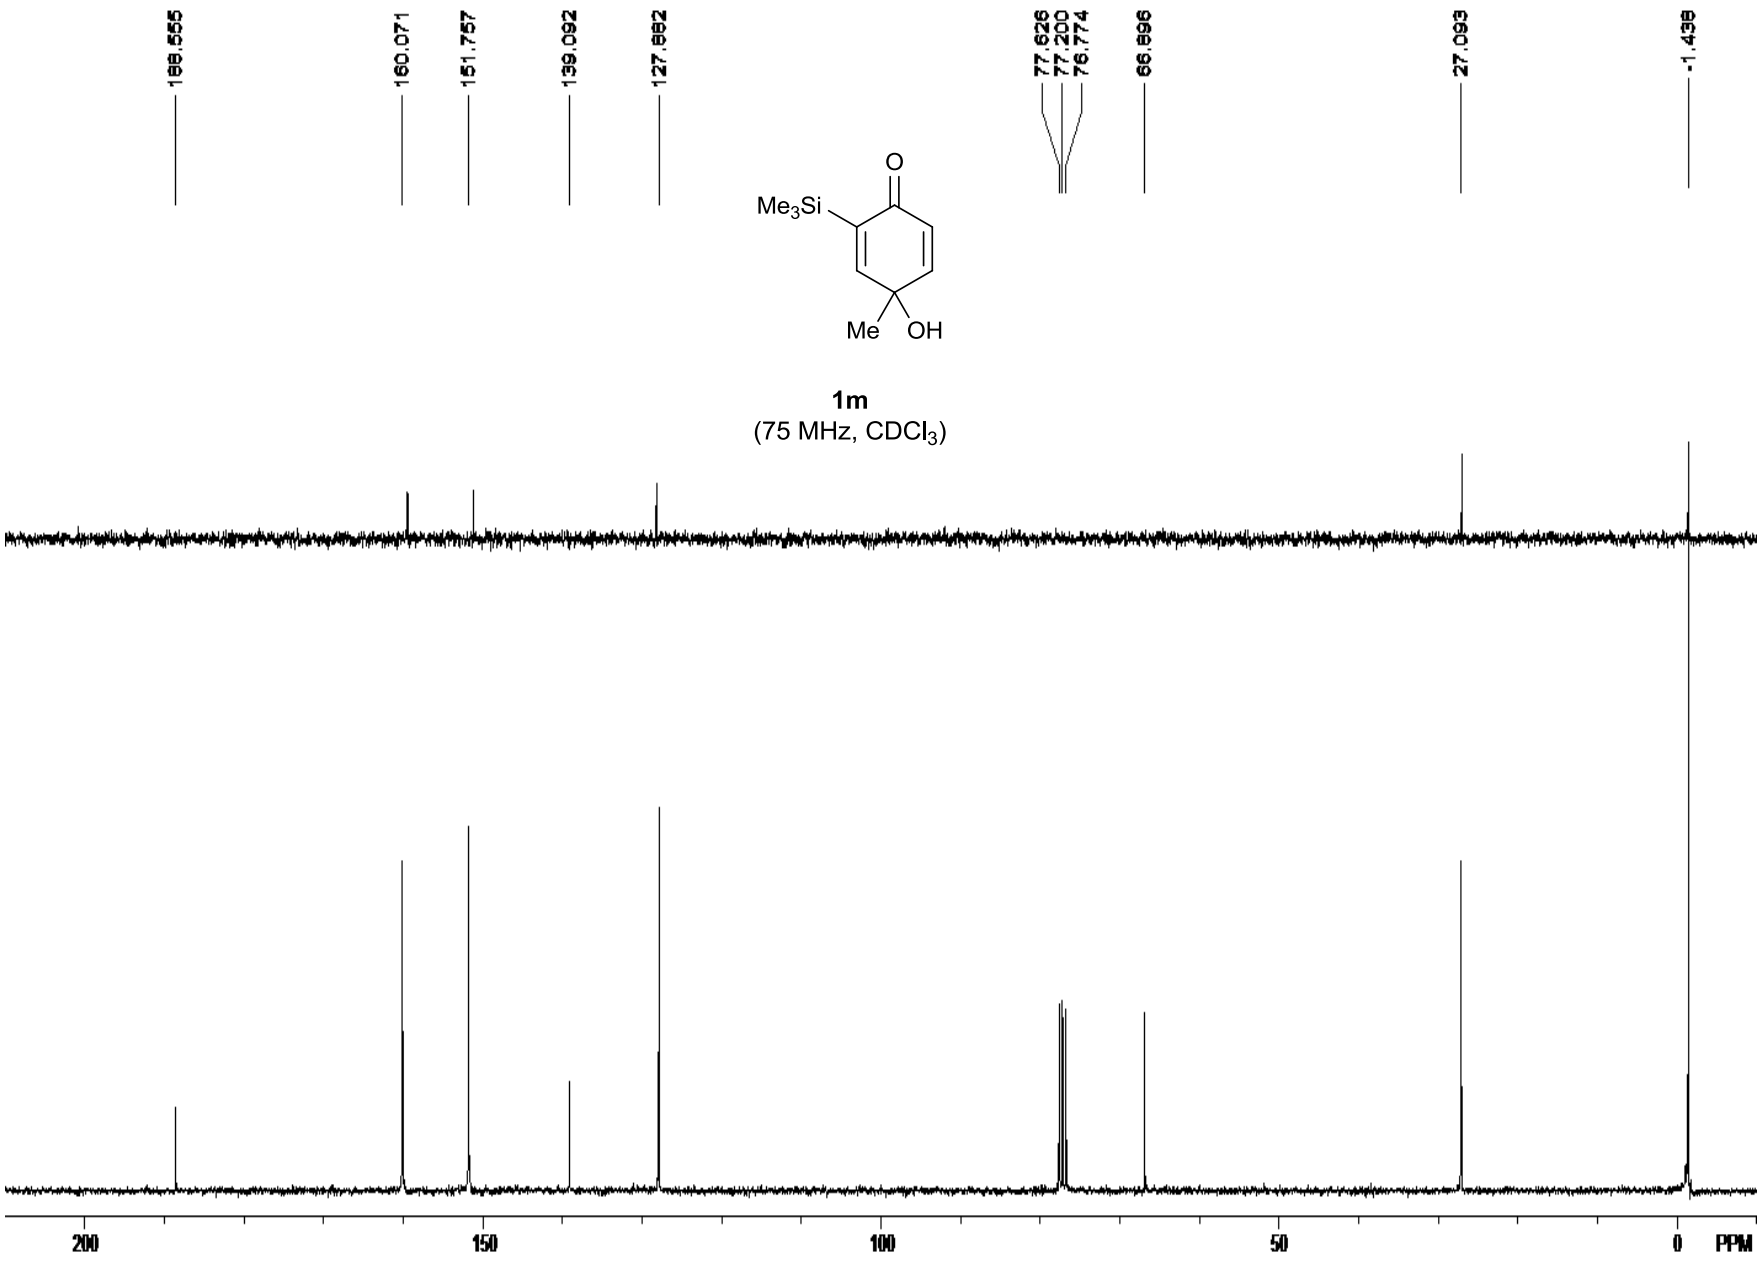

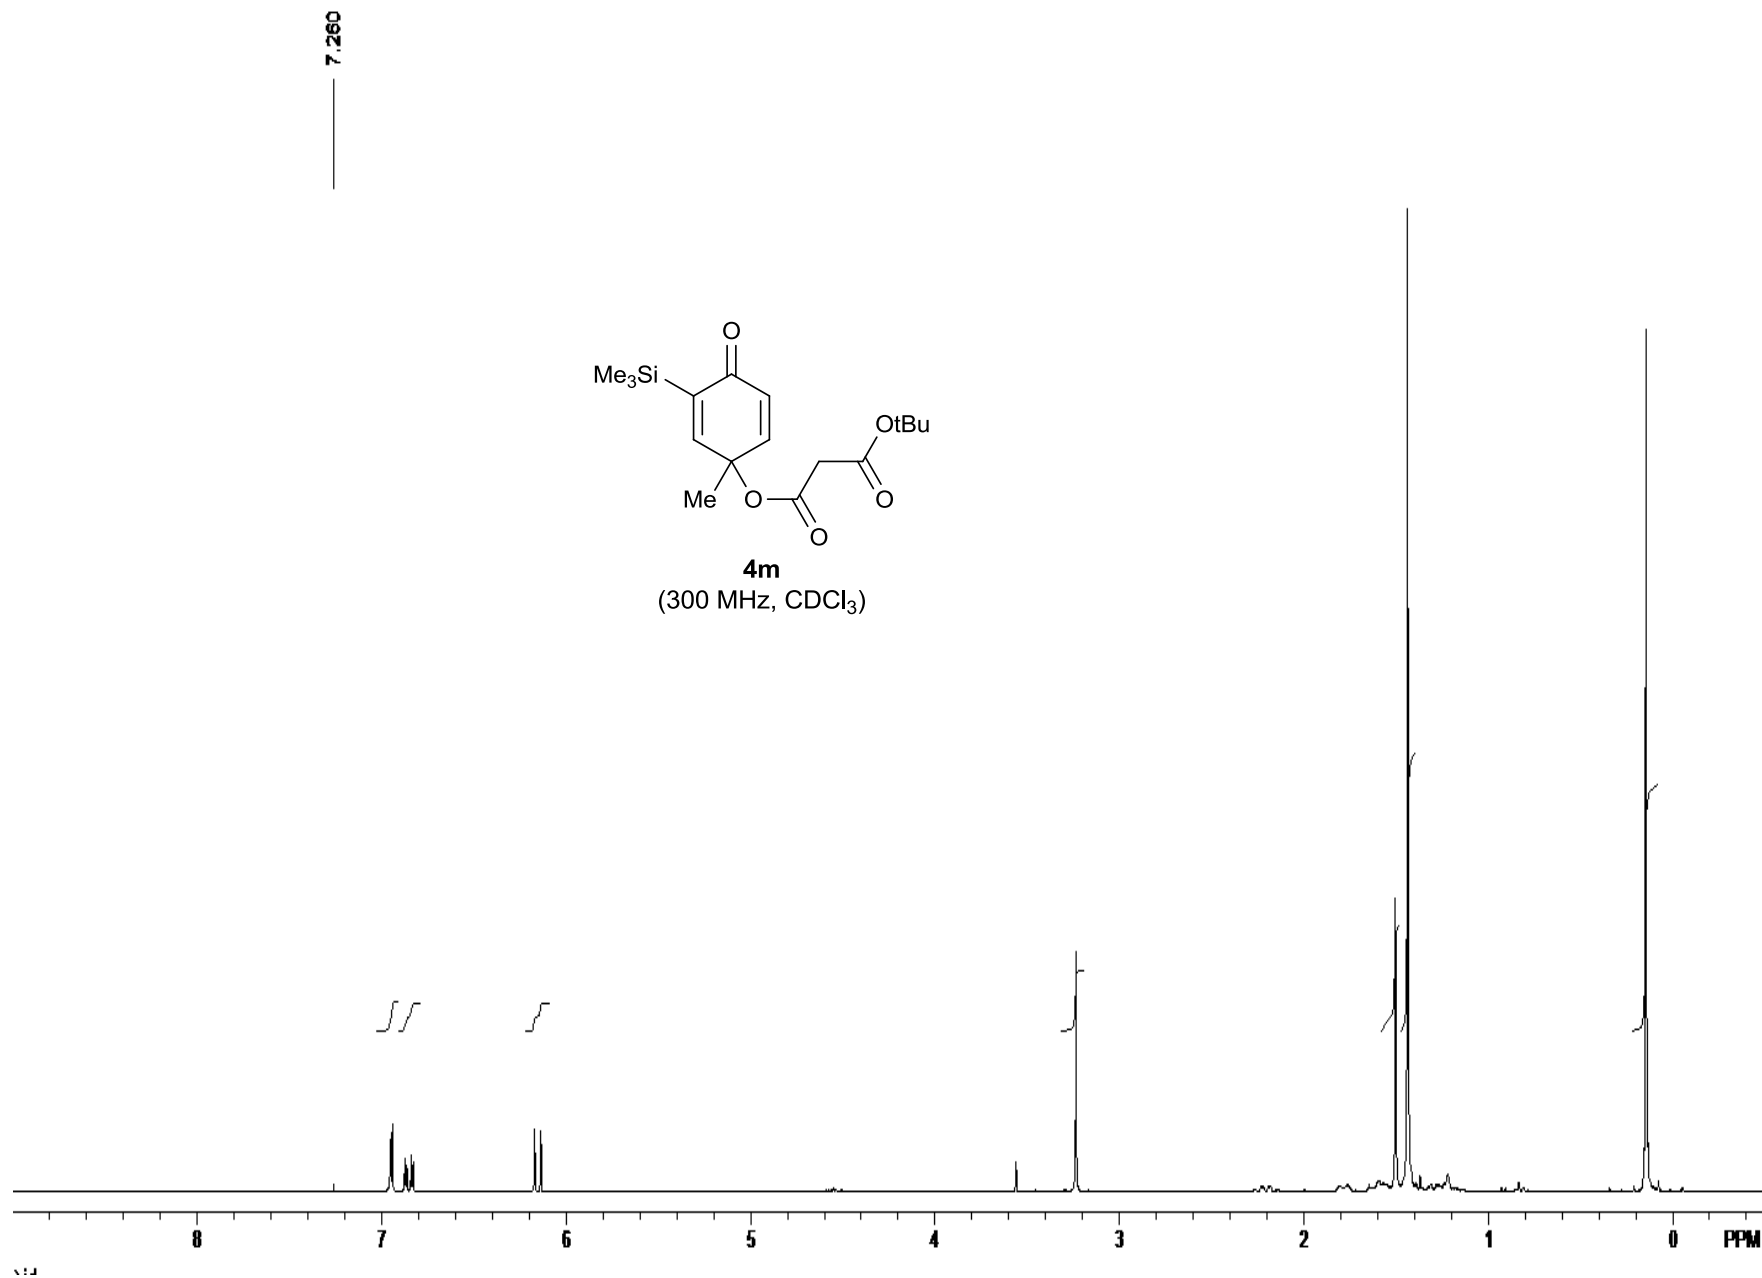

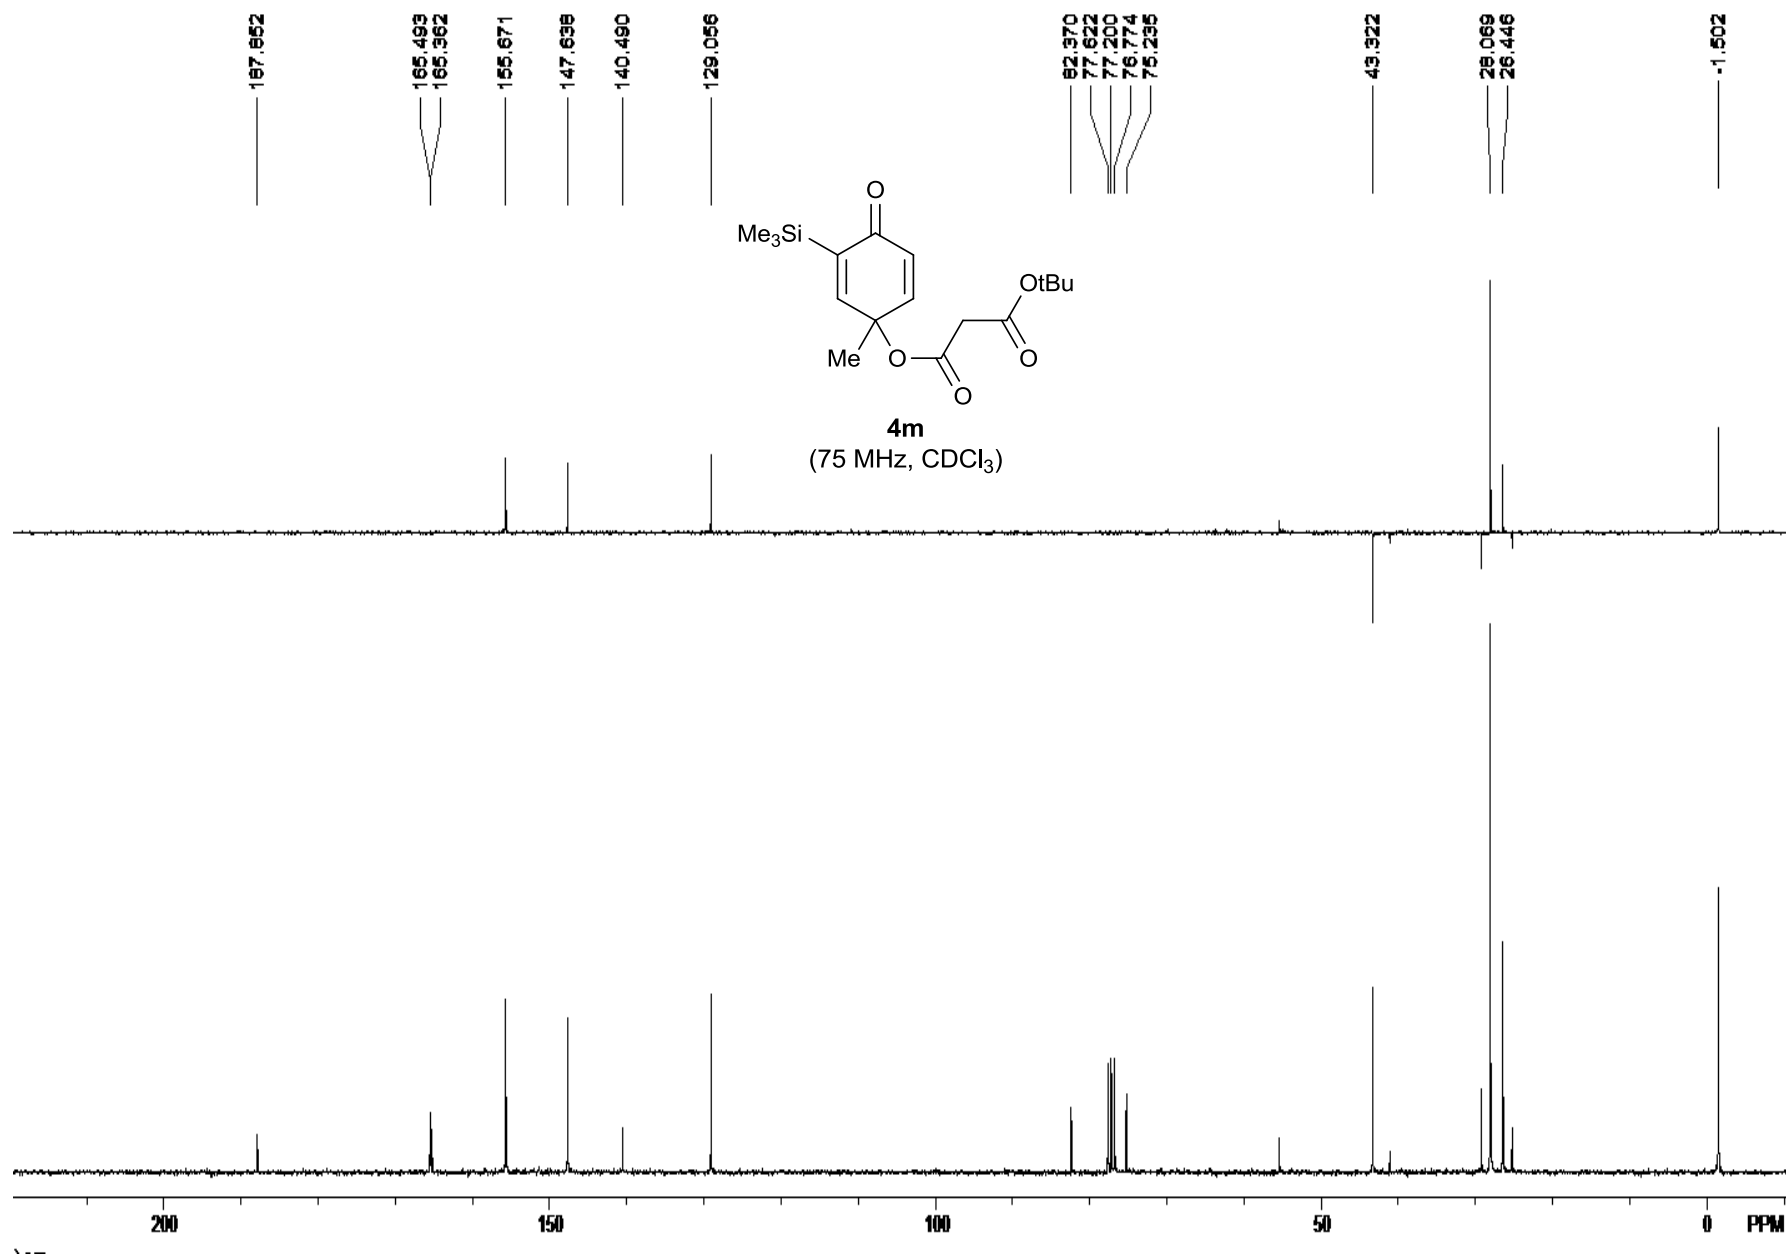

300.17 MHz  
cdcl3

7.26

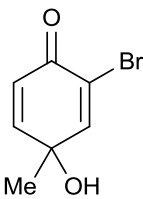

**1n**  
(300 MHz, CDCl<sub>3</sub>)

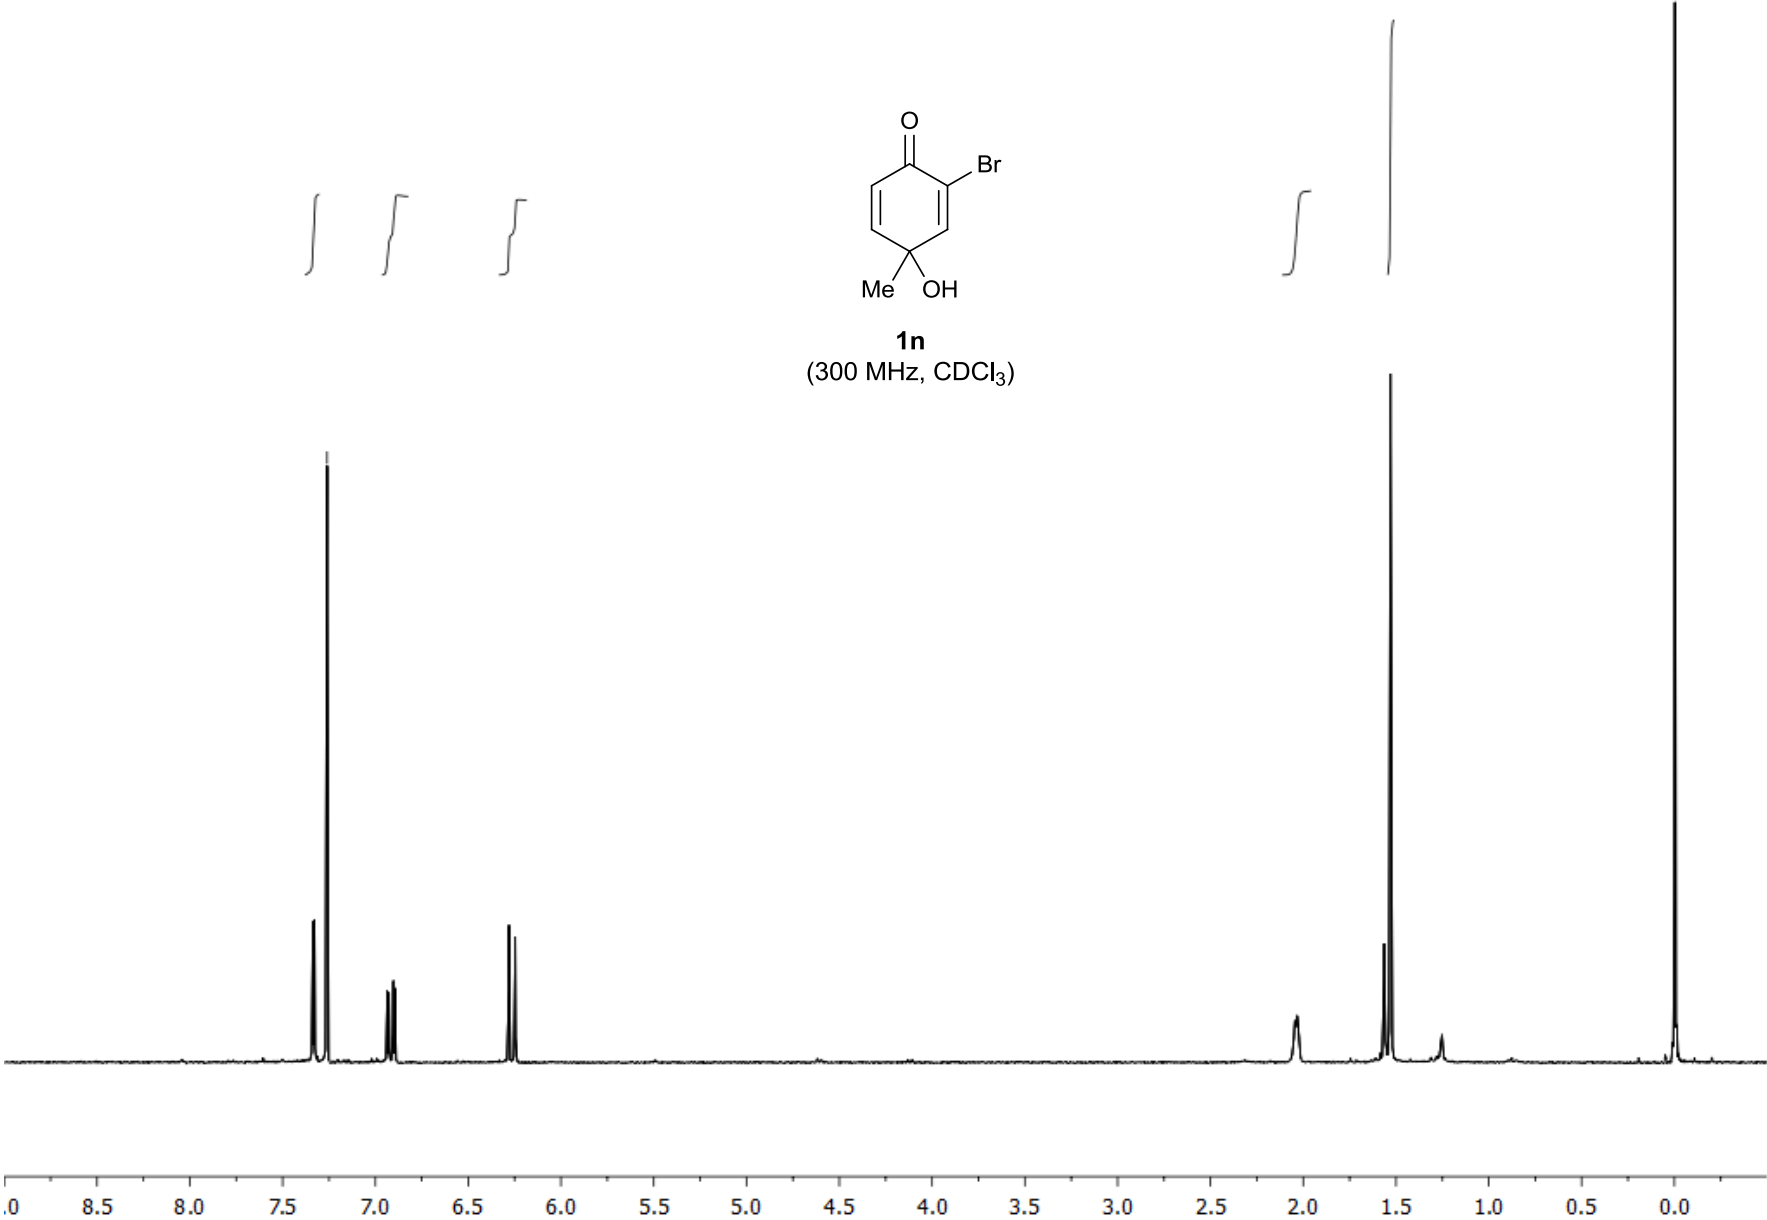

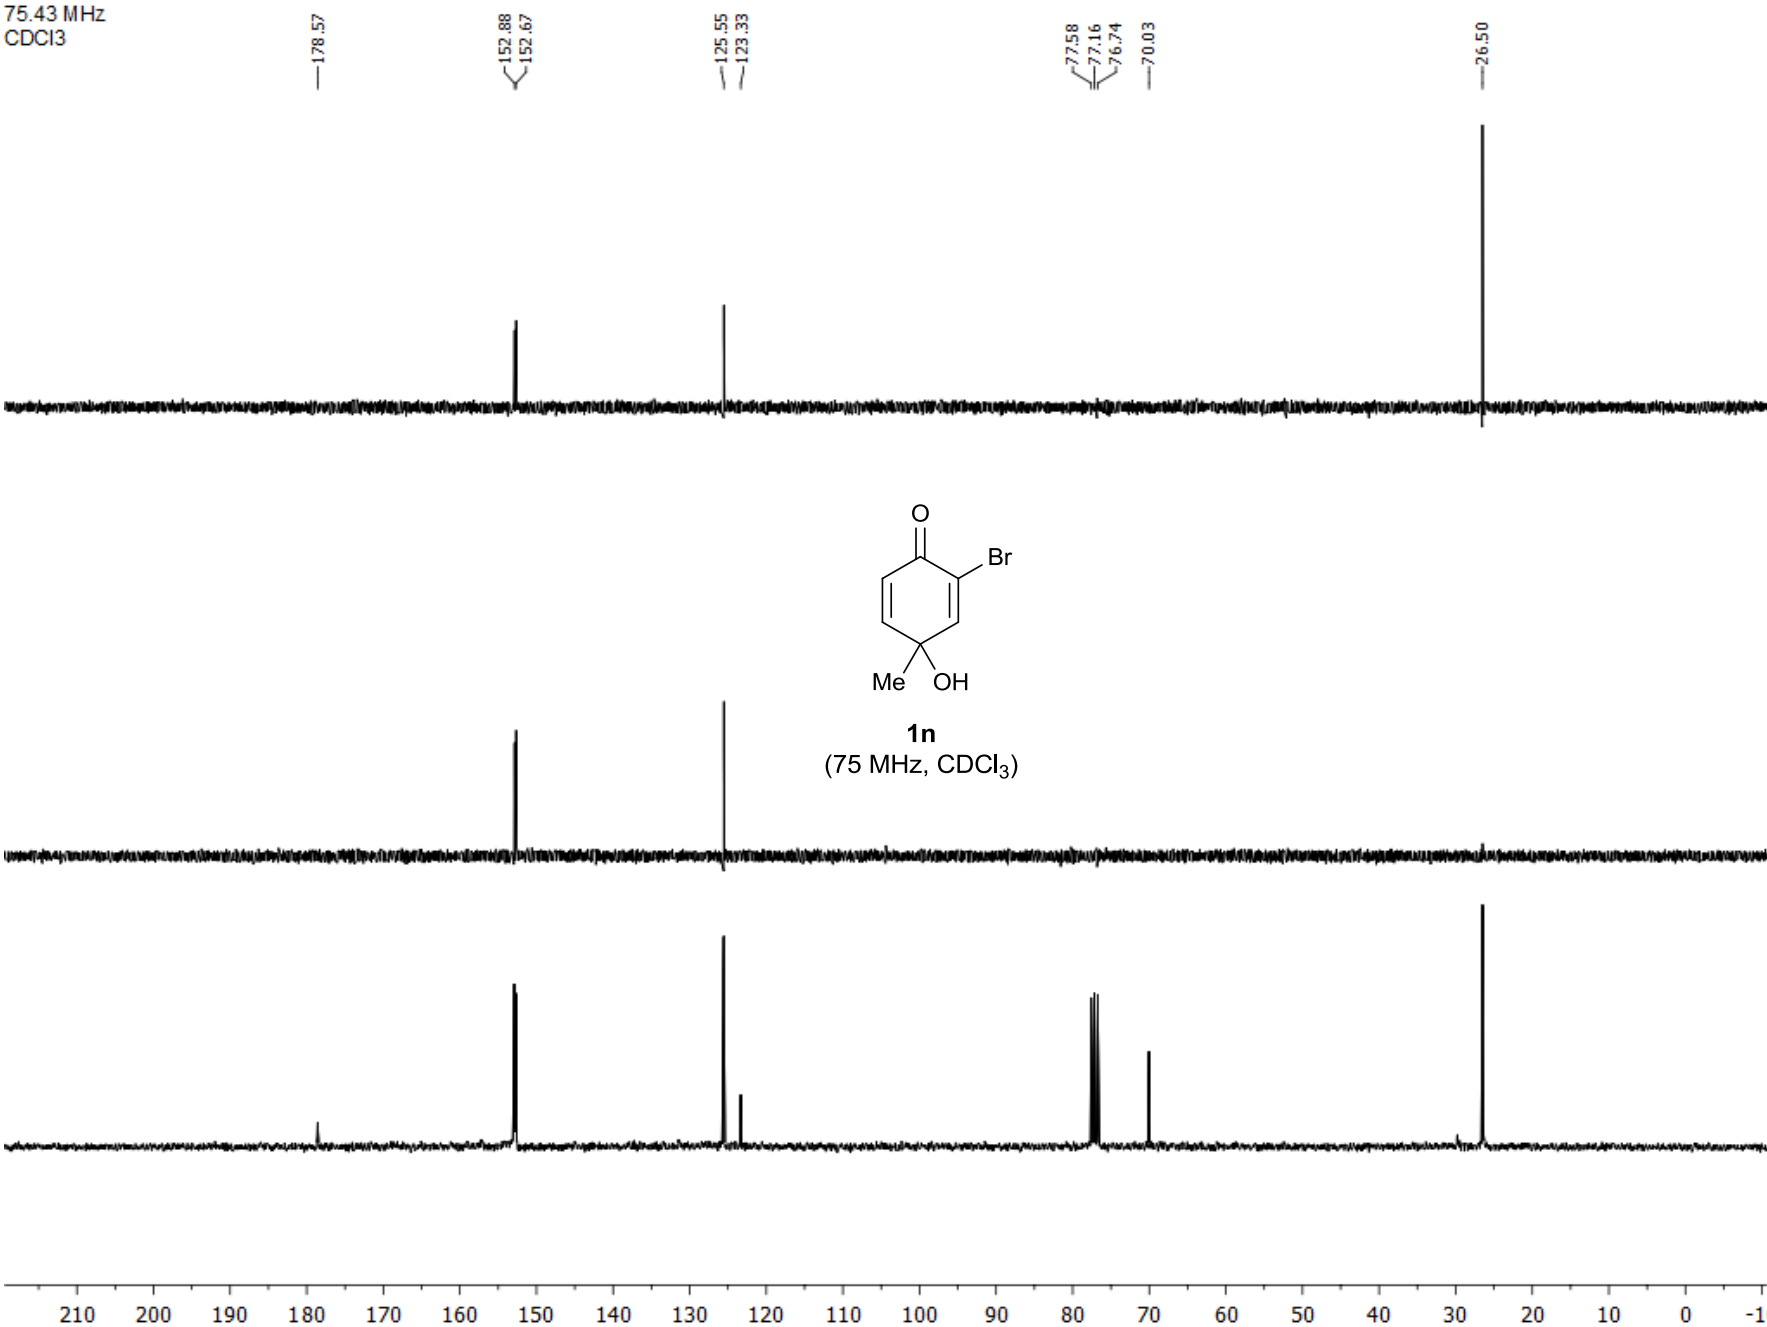



499.87 MHz  
cdcl3

7.26

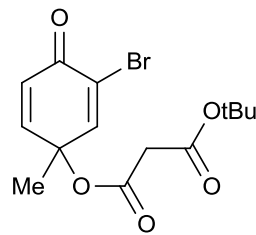

**4n**  
(500 MHz, CDCl<sub>3</sub>)

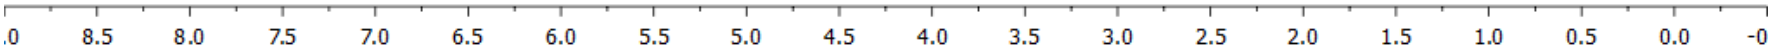

75.43 MHz  
CDCl<sub>3</sub>

177.90

165.31  
165.24

148.79  
148.72

126.71  
124.62

82.67  
77.58  
77.16  
76.73

42.96

28.03  
25.91

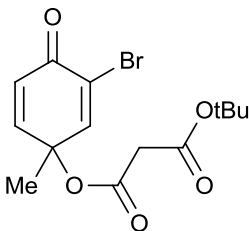

**4n**  
(75 MHz, CDCl<sub>3</sub>)

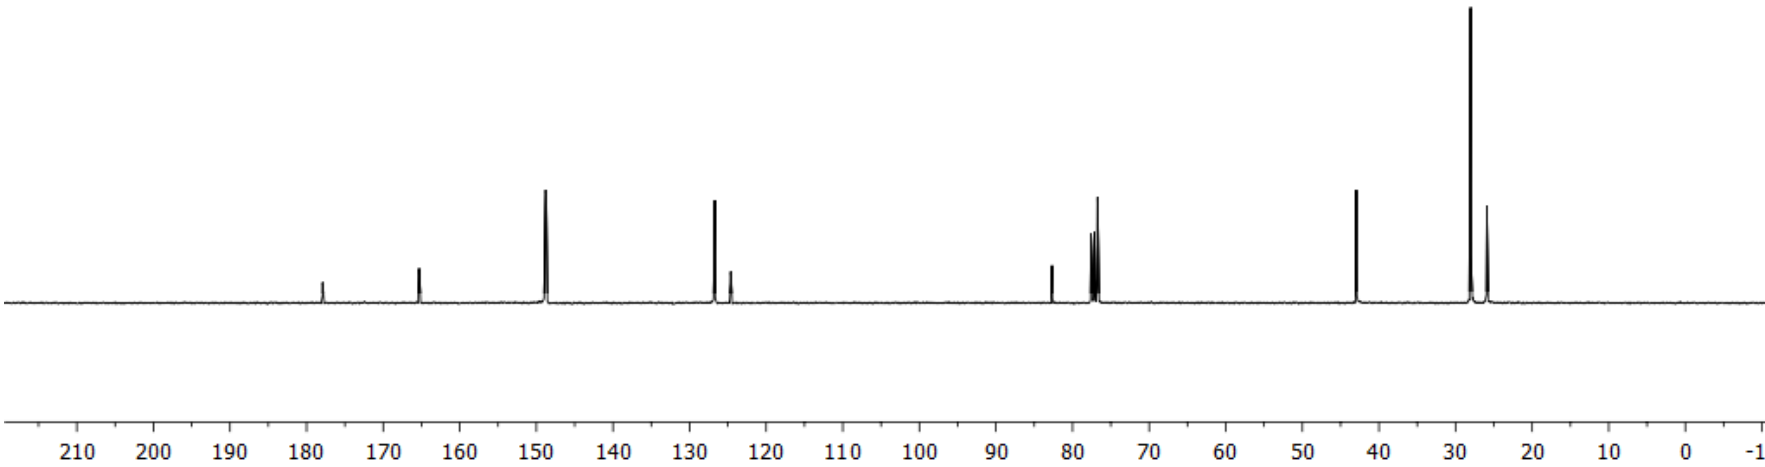

0.000

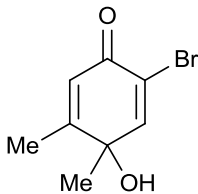

**1o**  
(300 MHz, CDCl<sub>3</sub>)

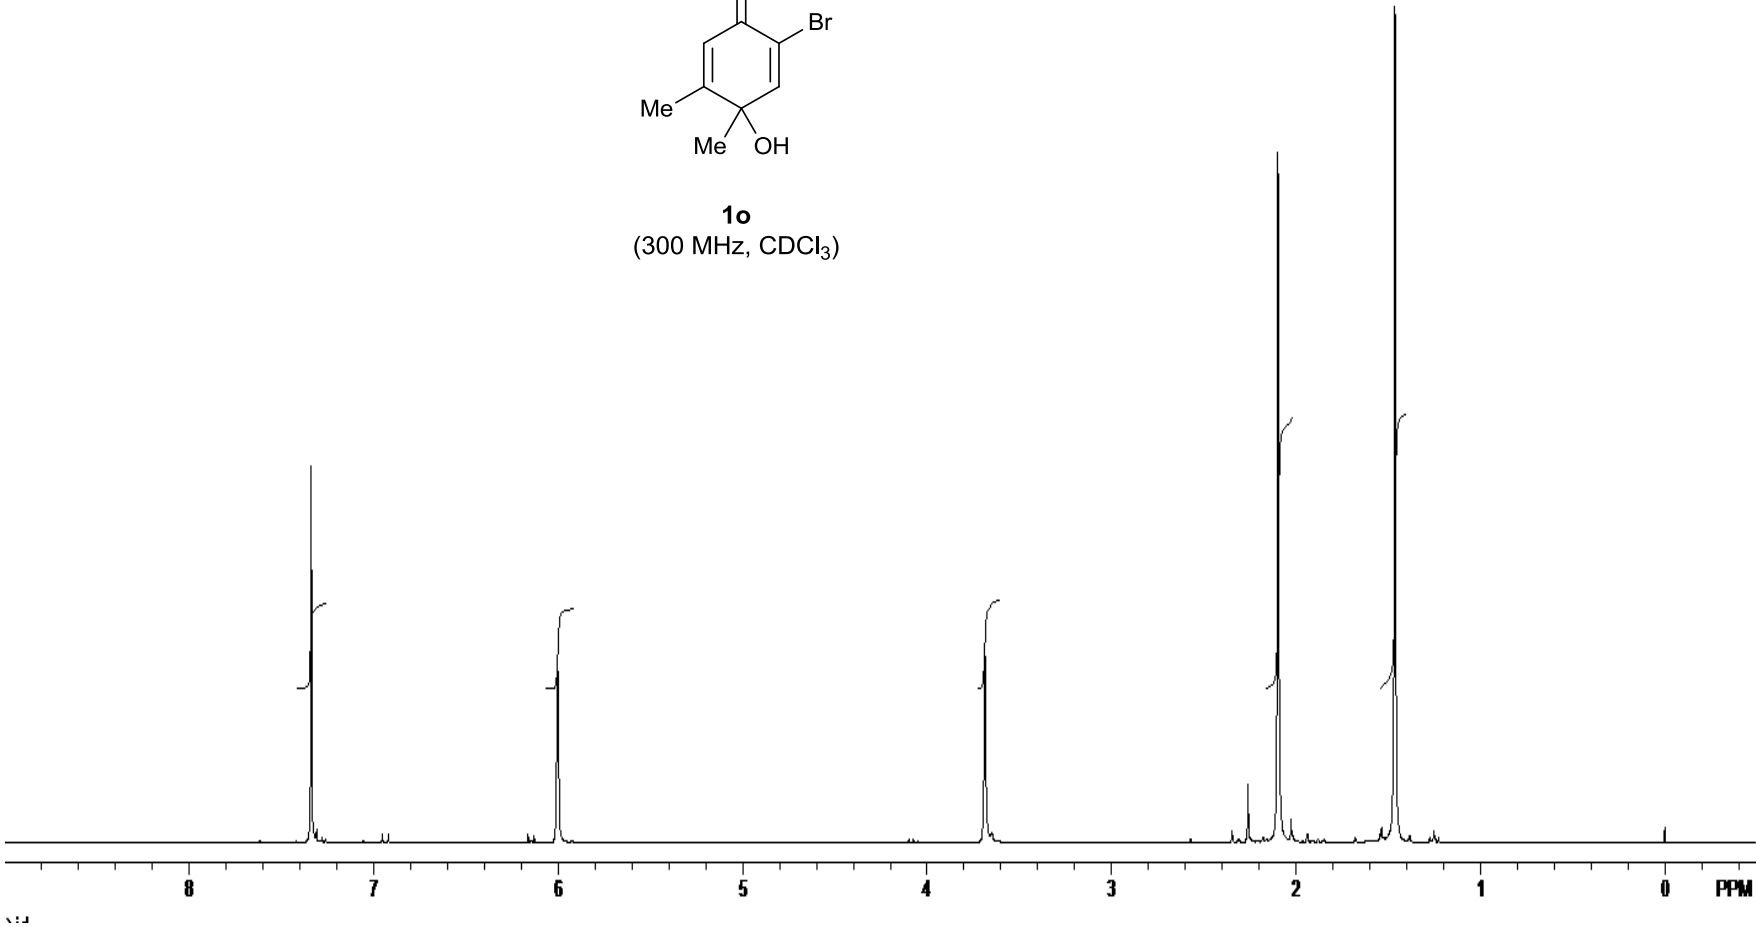

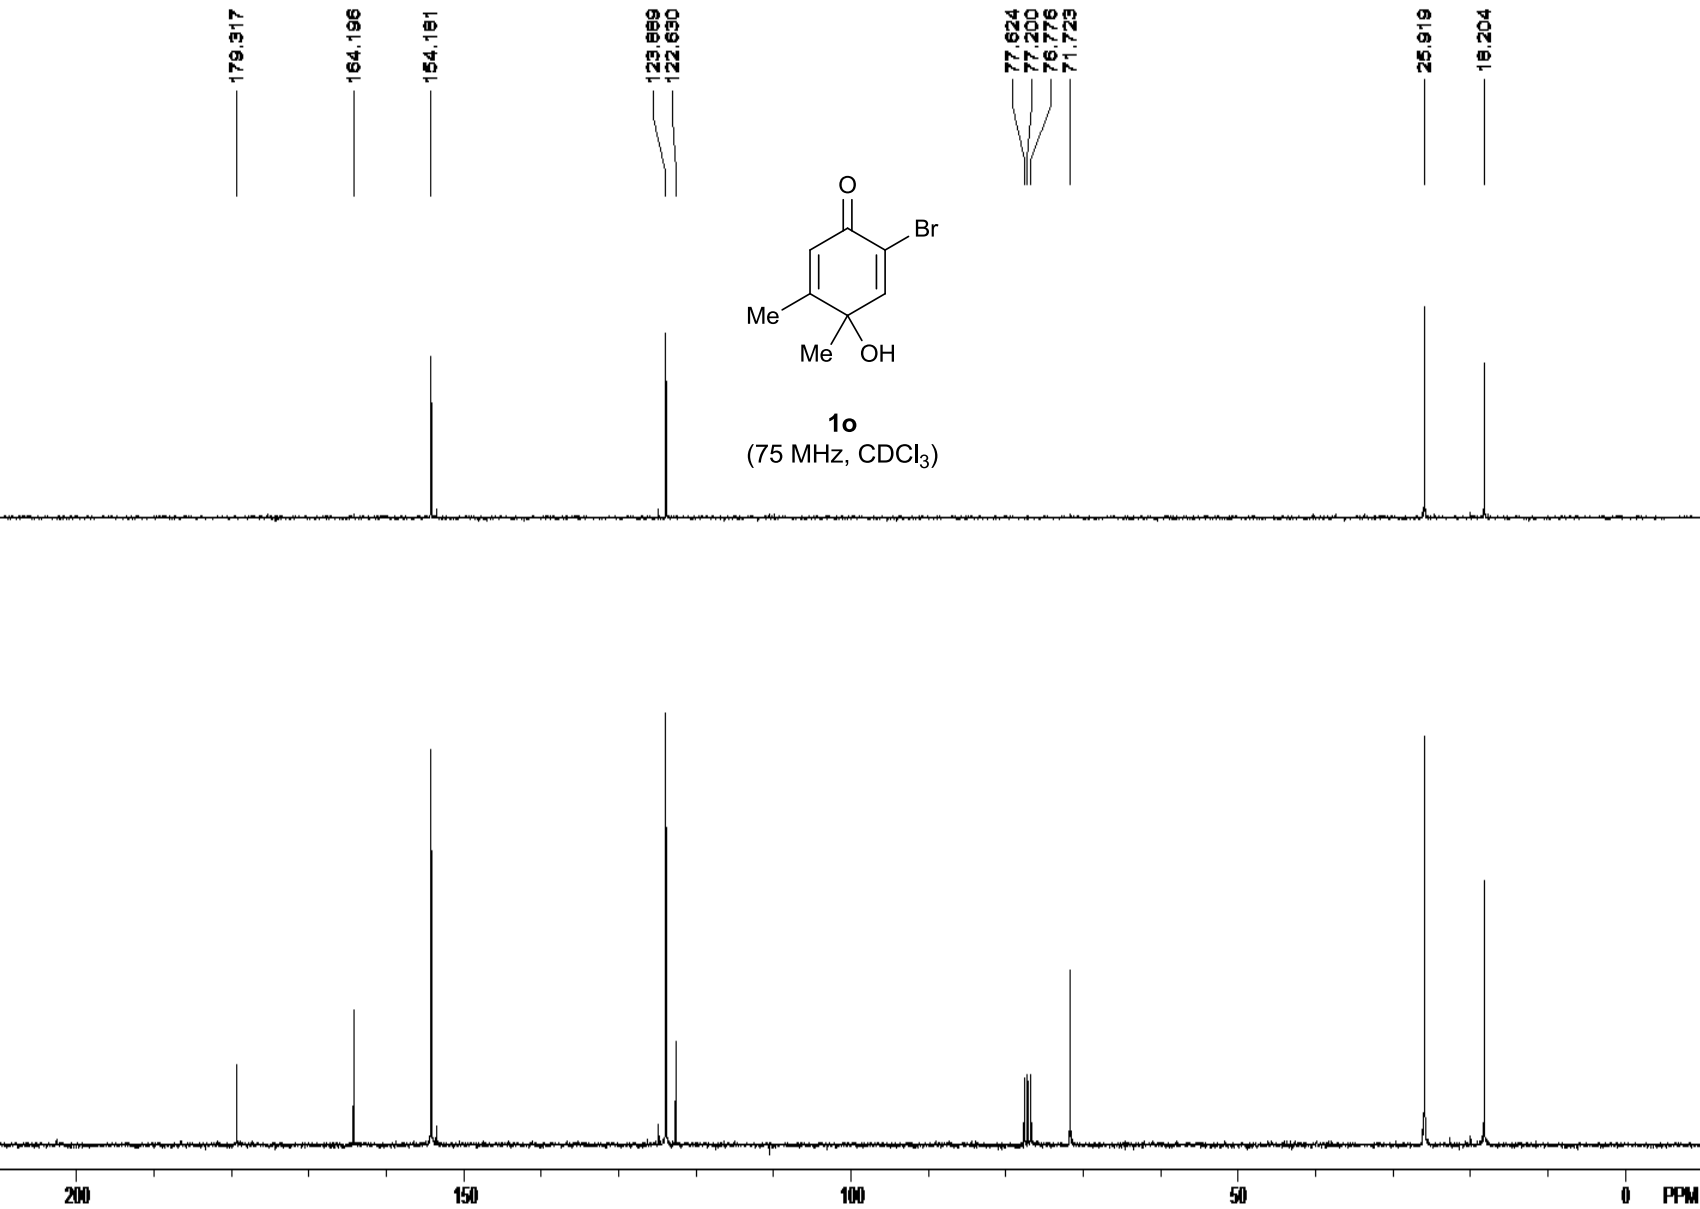

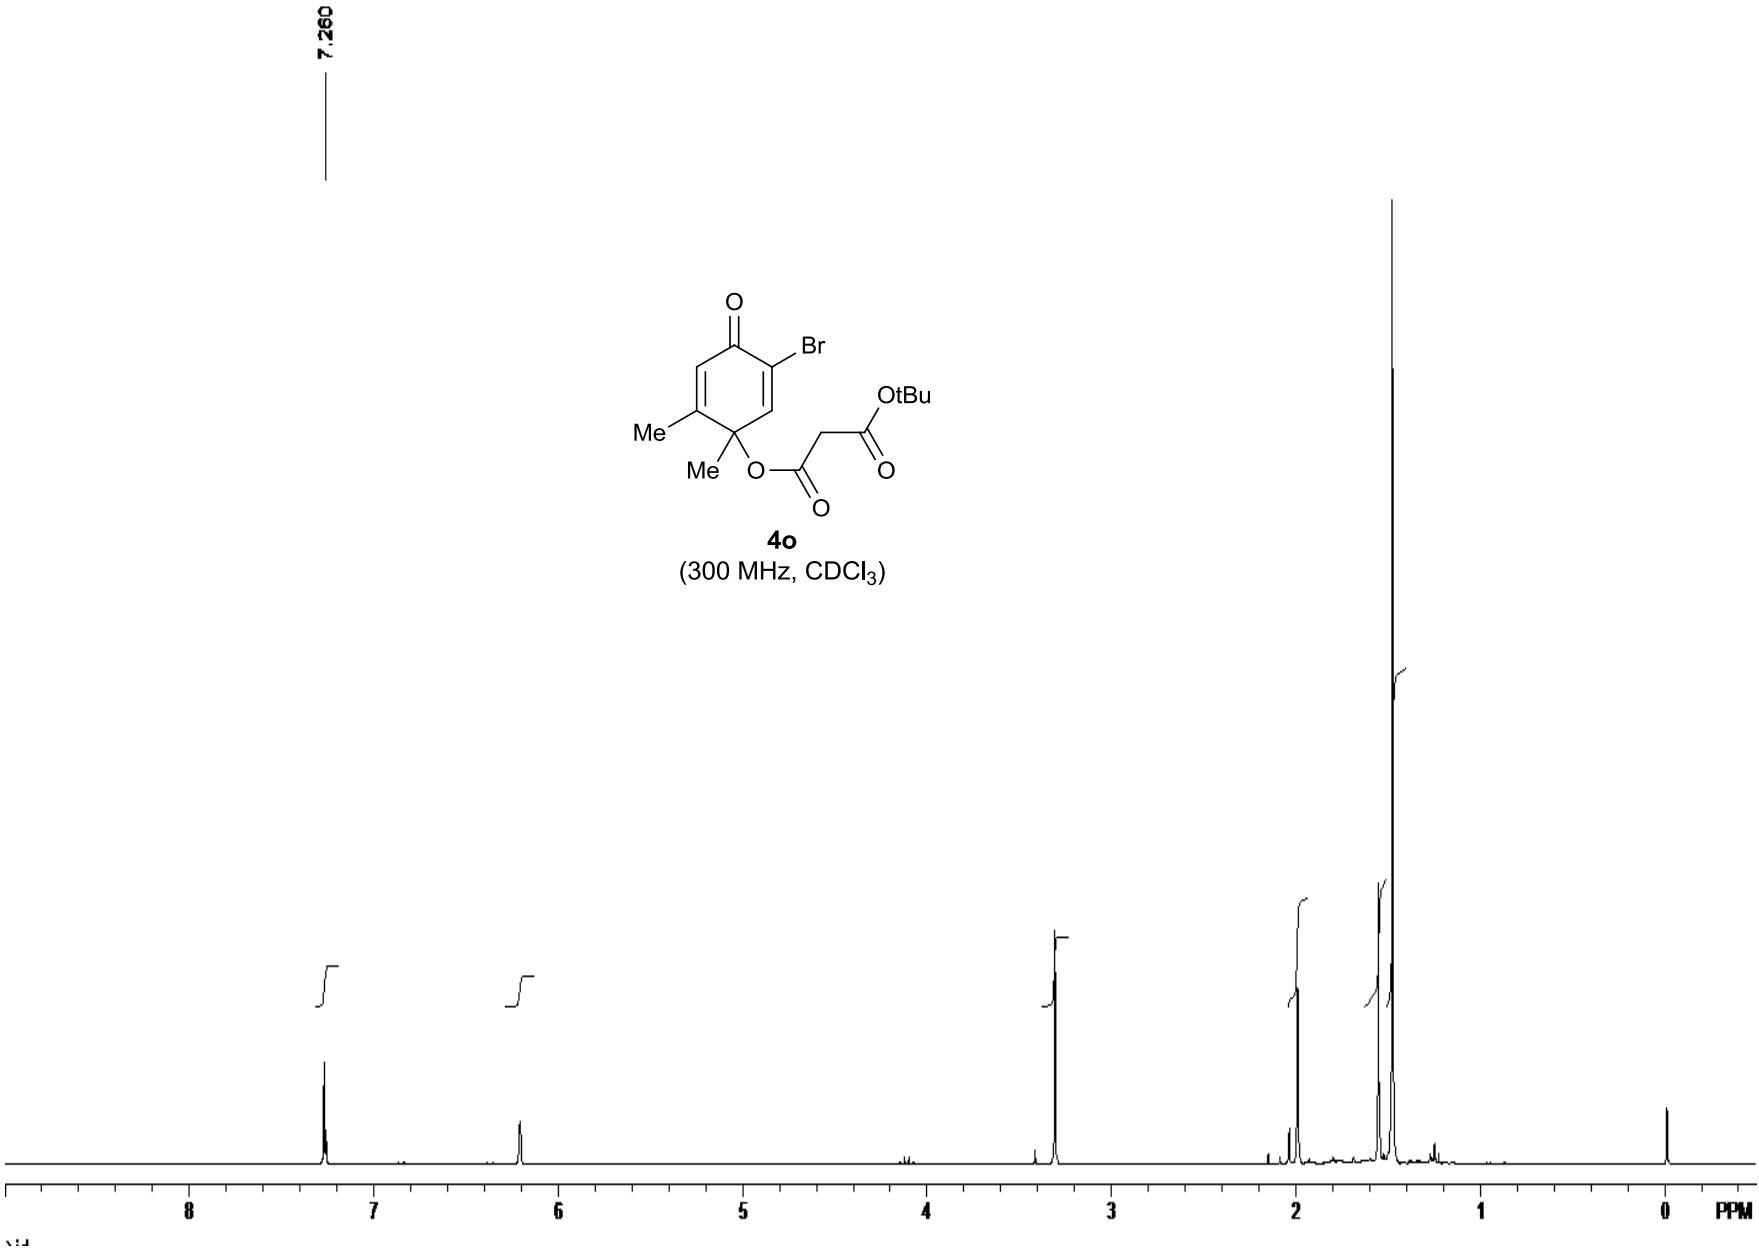

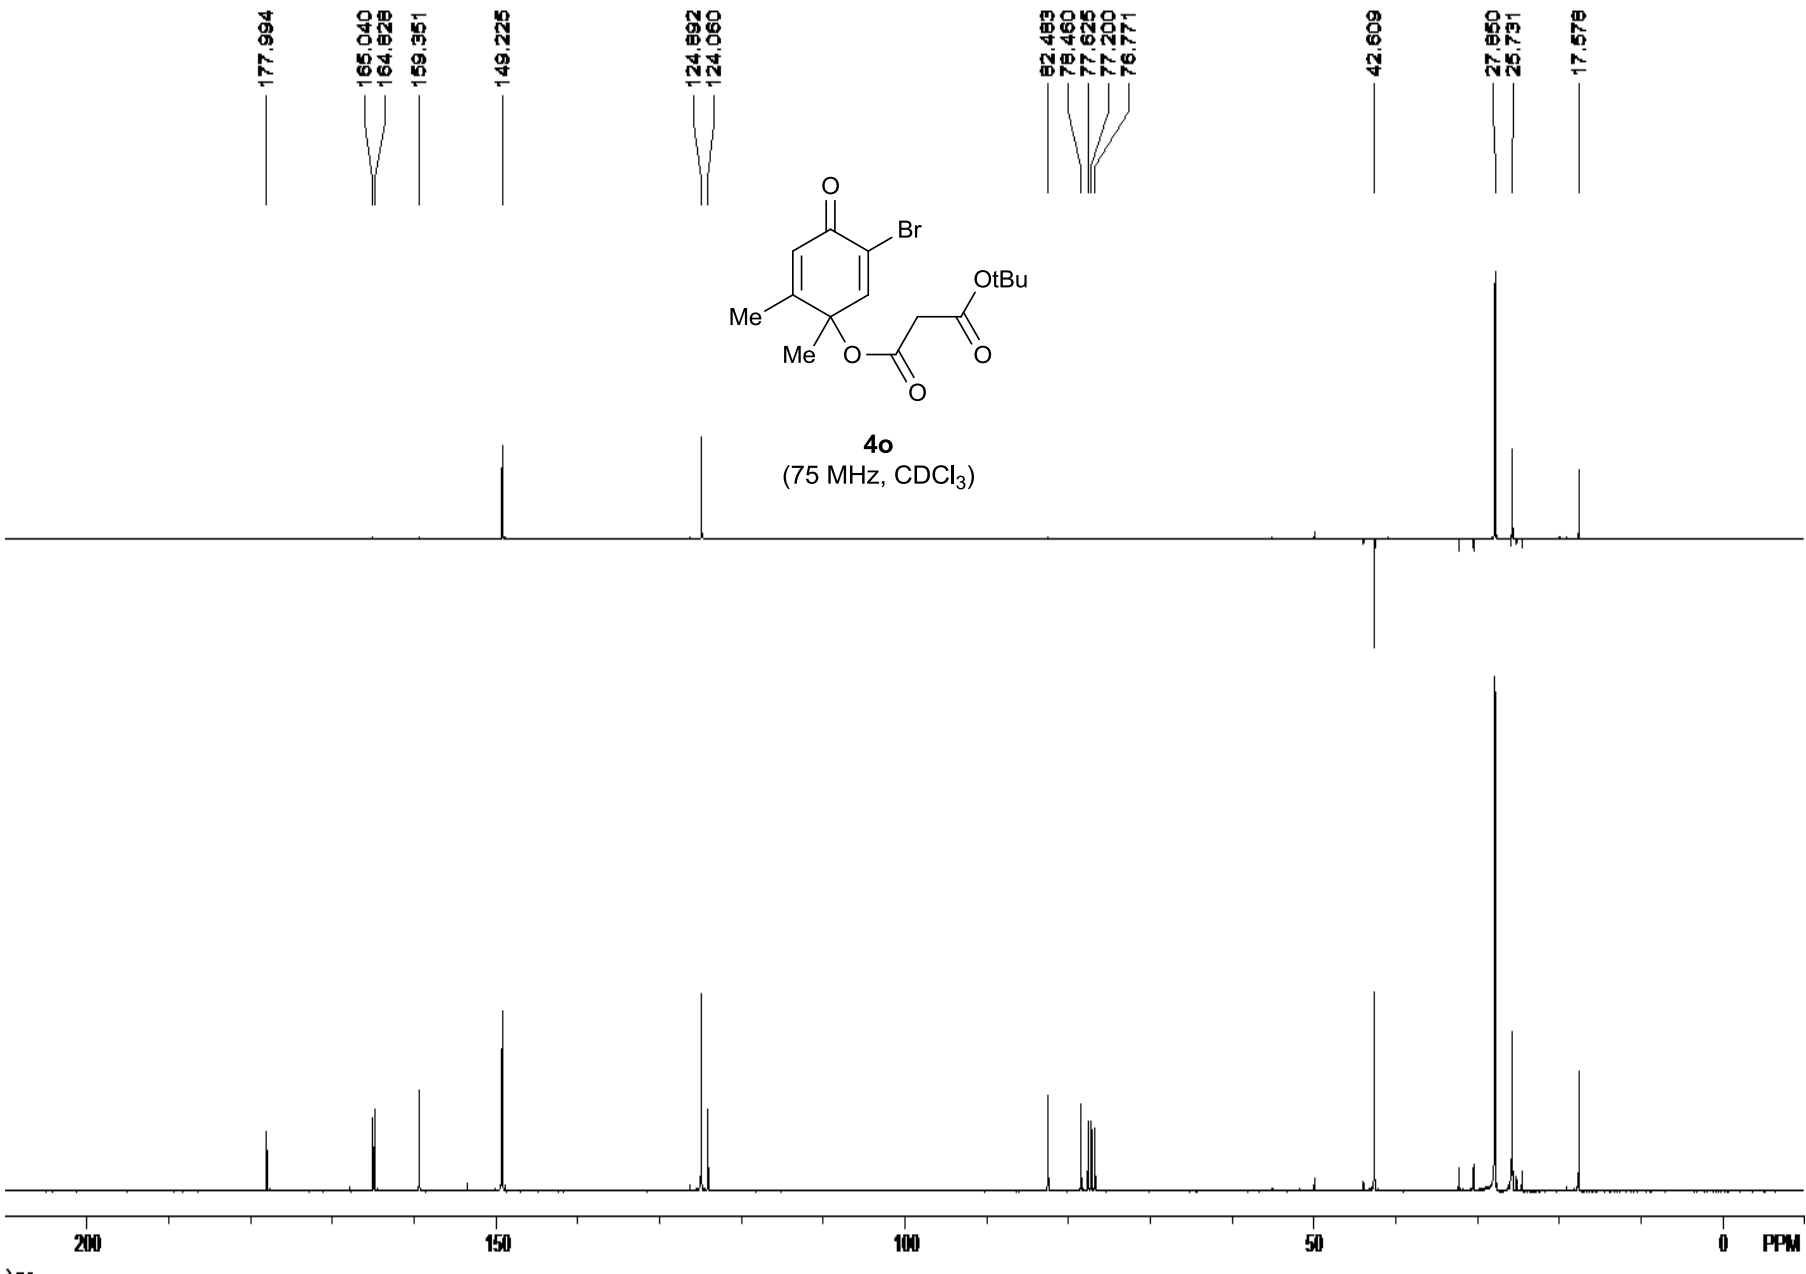

299.96 MHz  
CDCl<sub>3</sub>

7.2  
7.1

5.5

3.8

2.3  
2.2

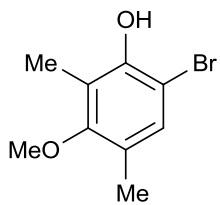

**S9**  
(300 MHz, CDCl<sub>3</sub>)

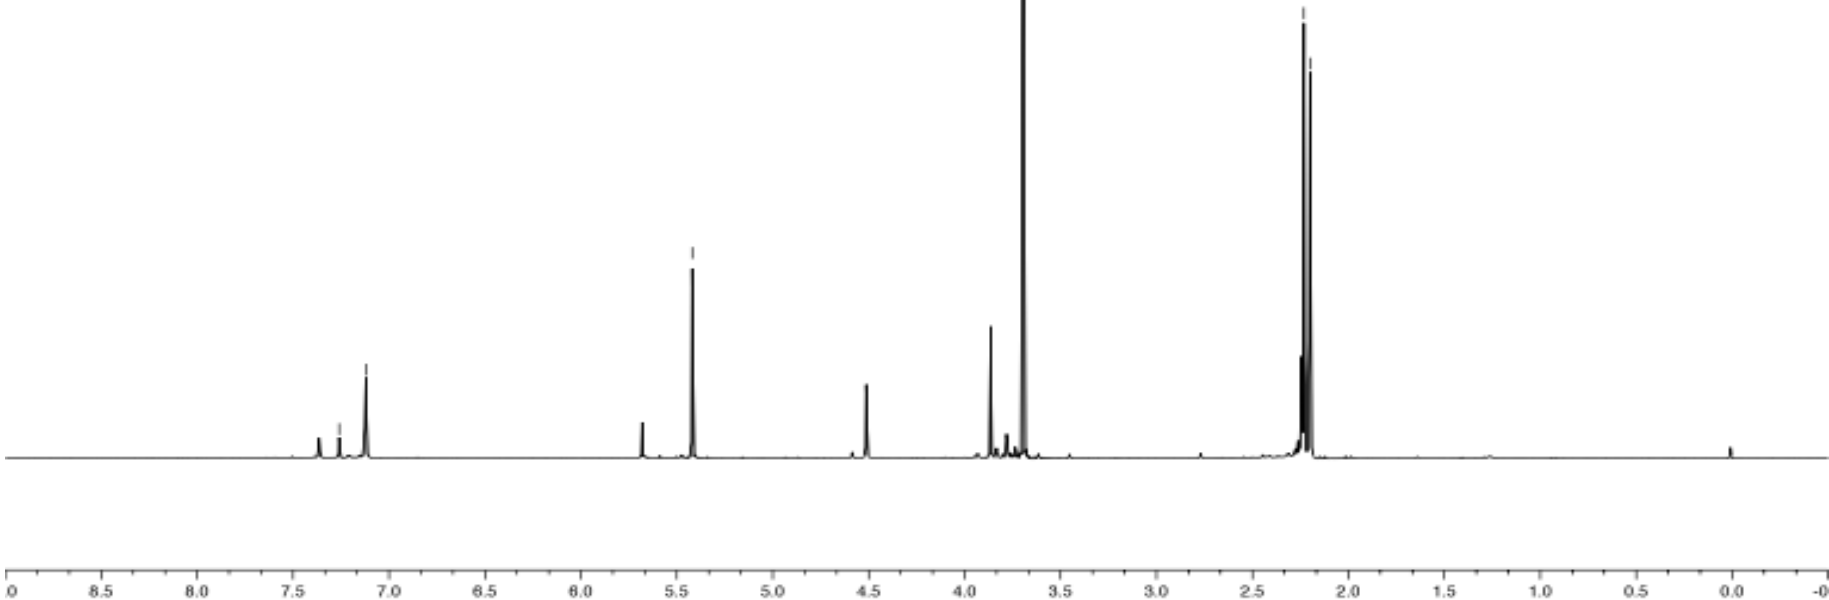

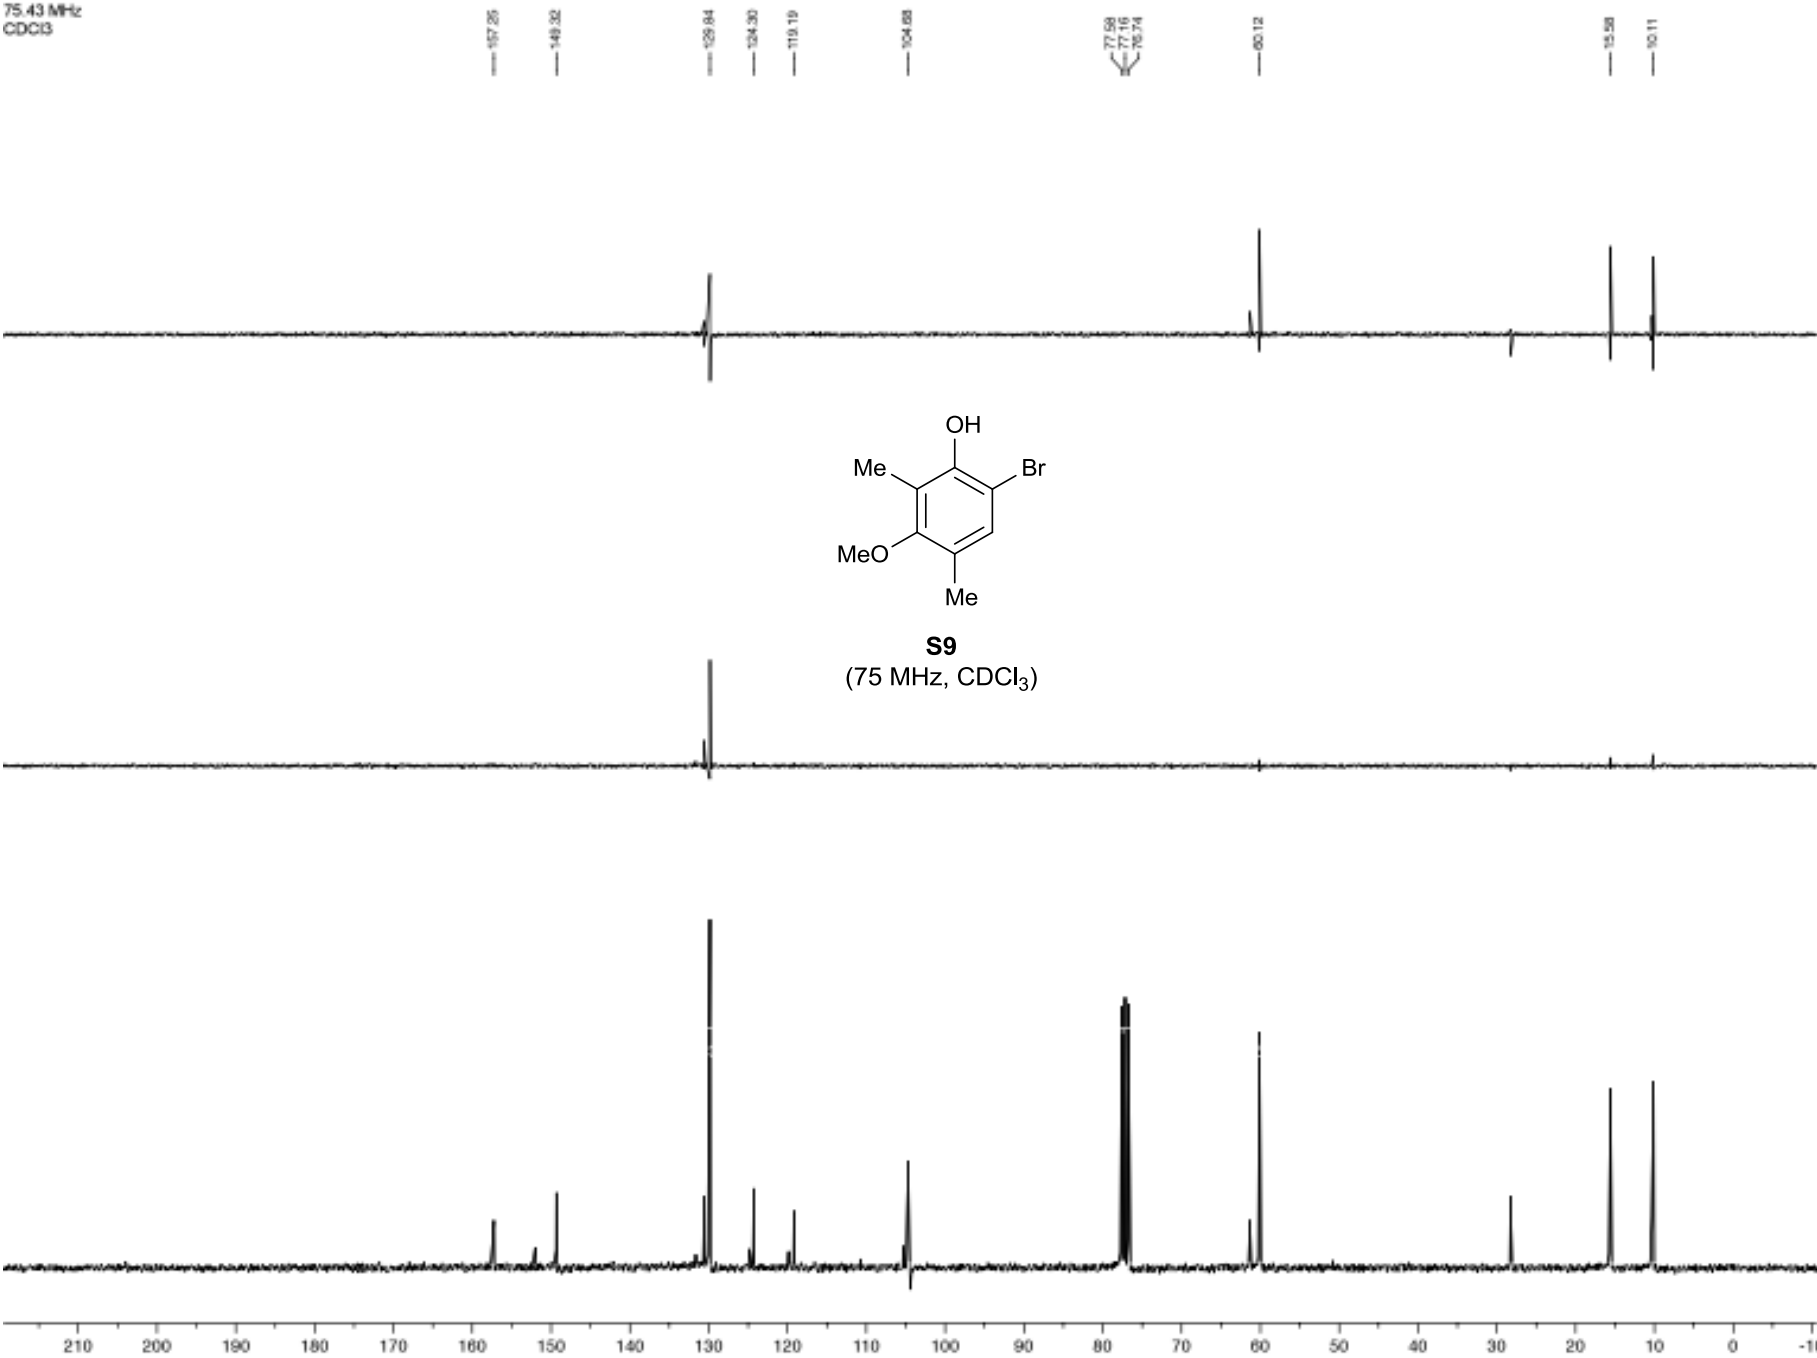



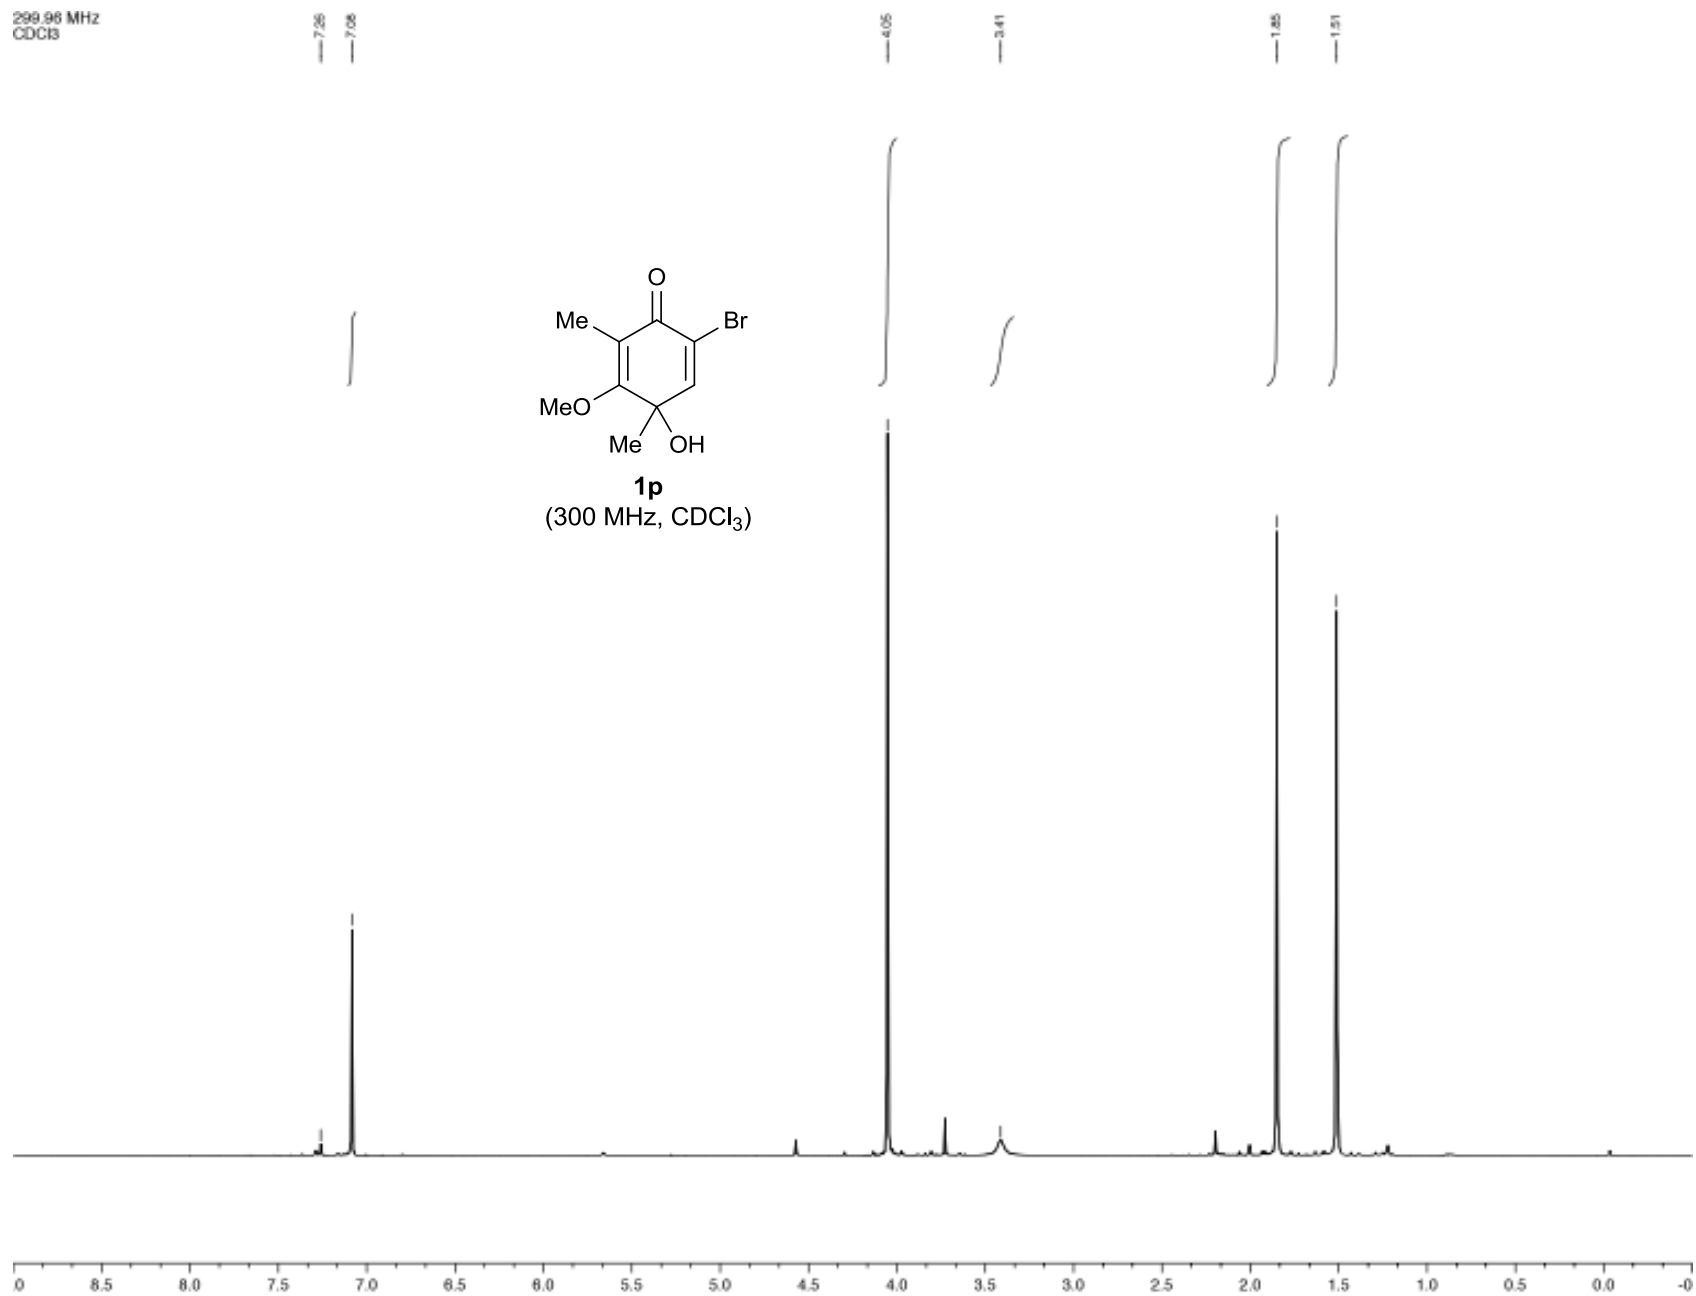

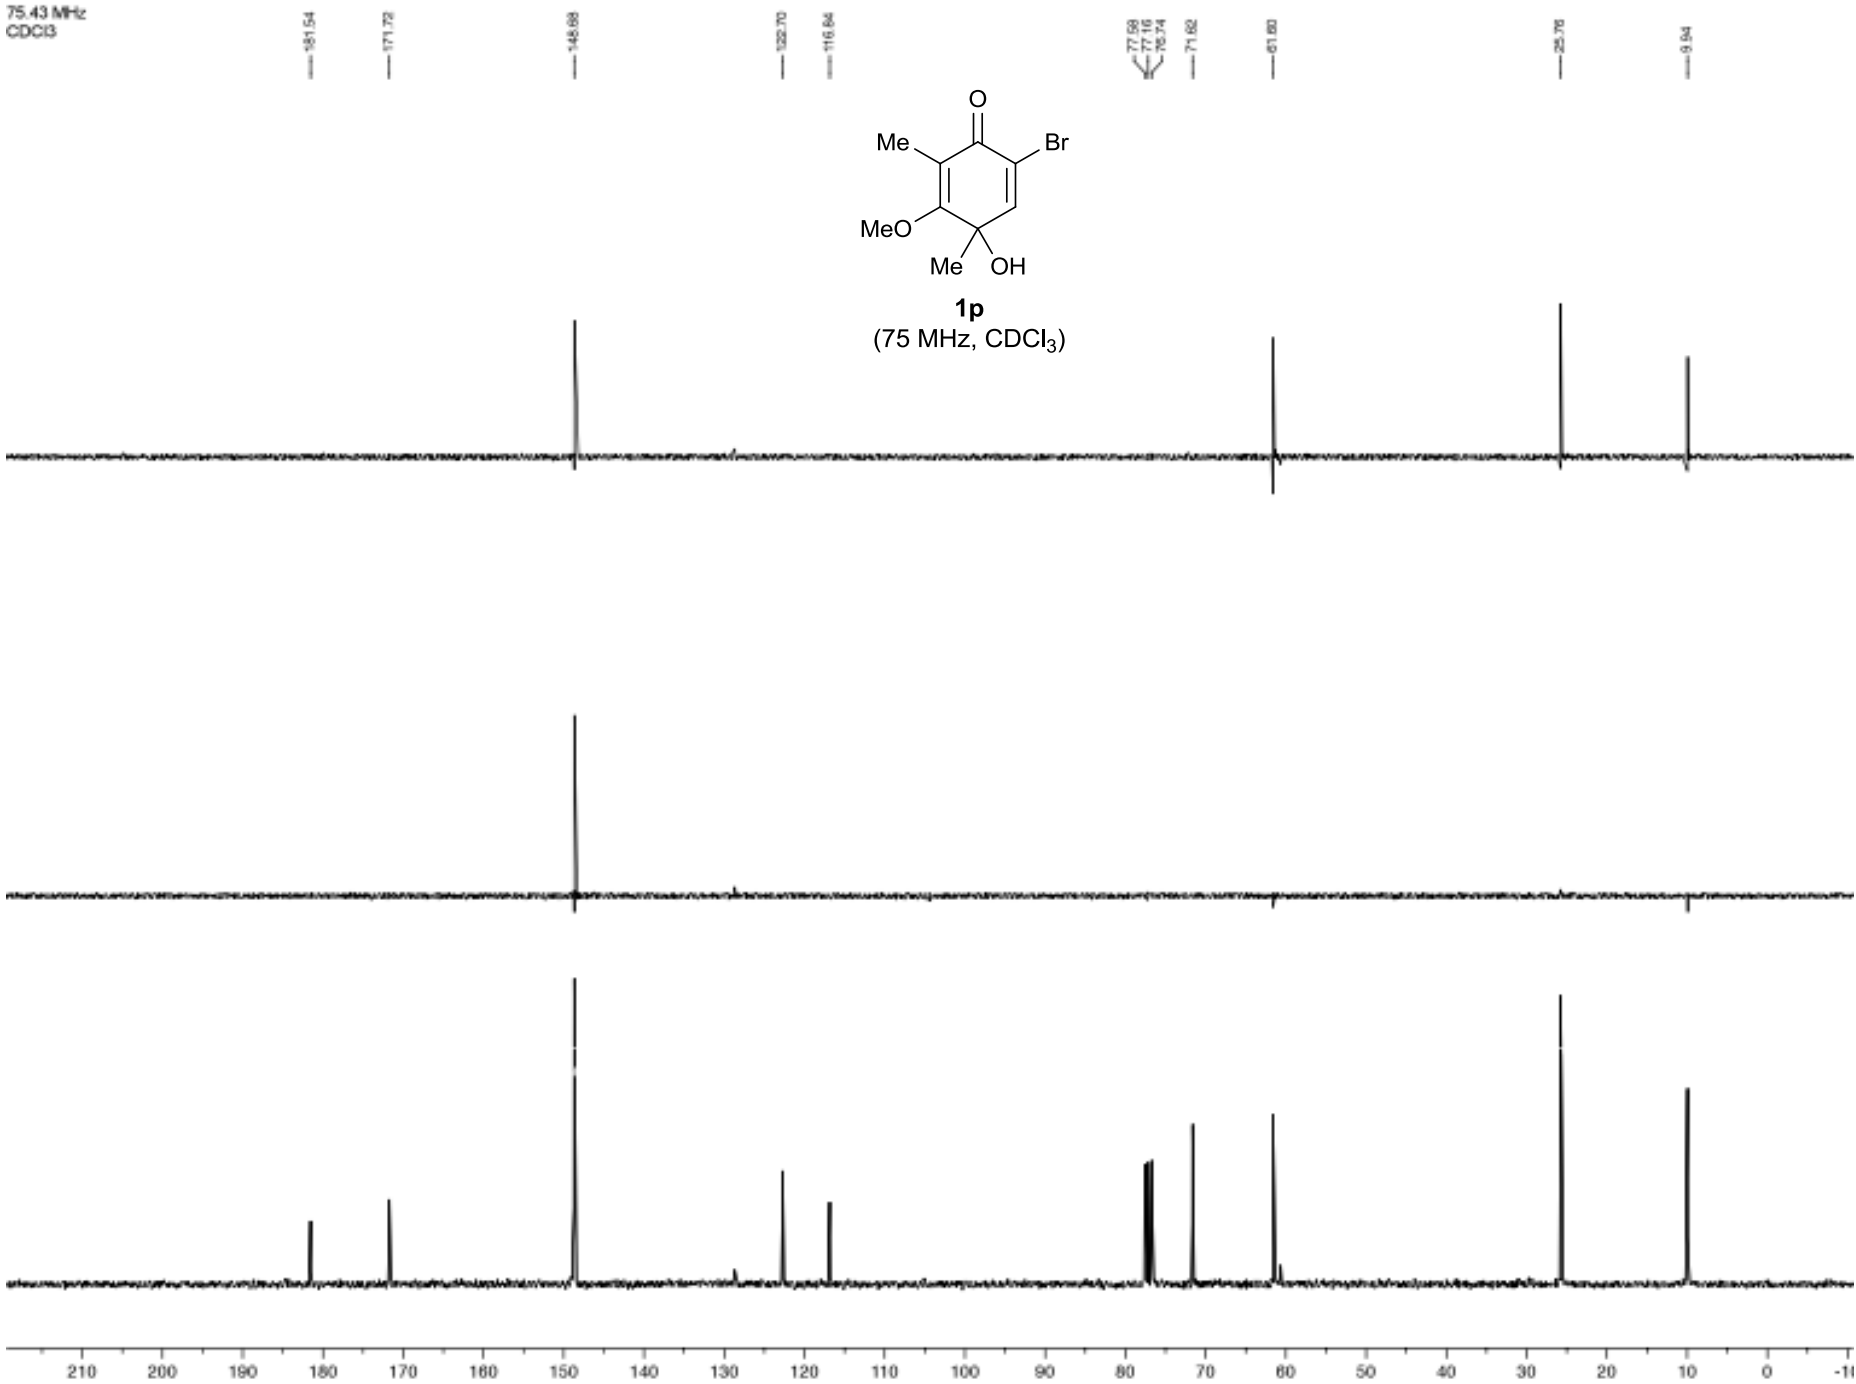

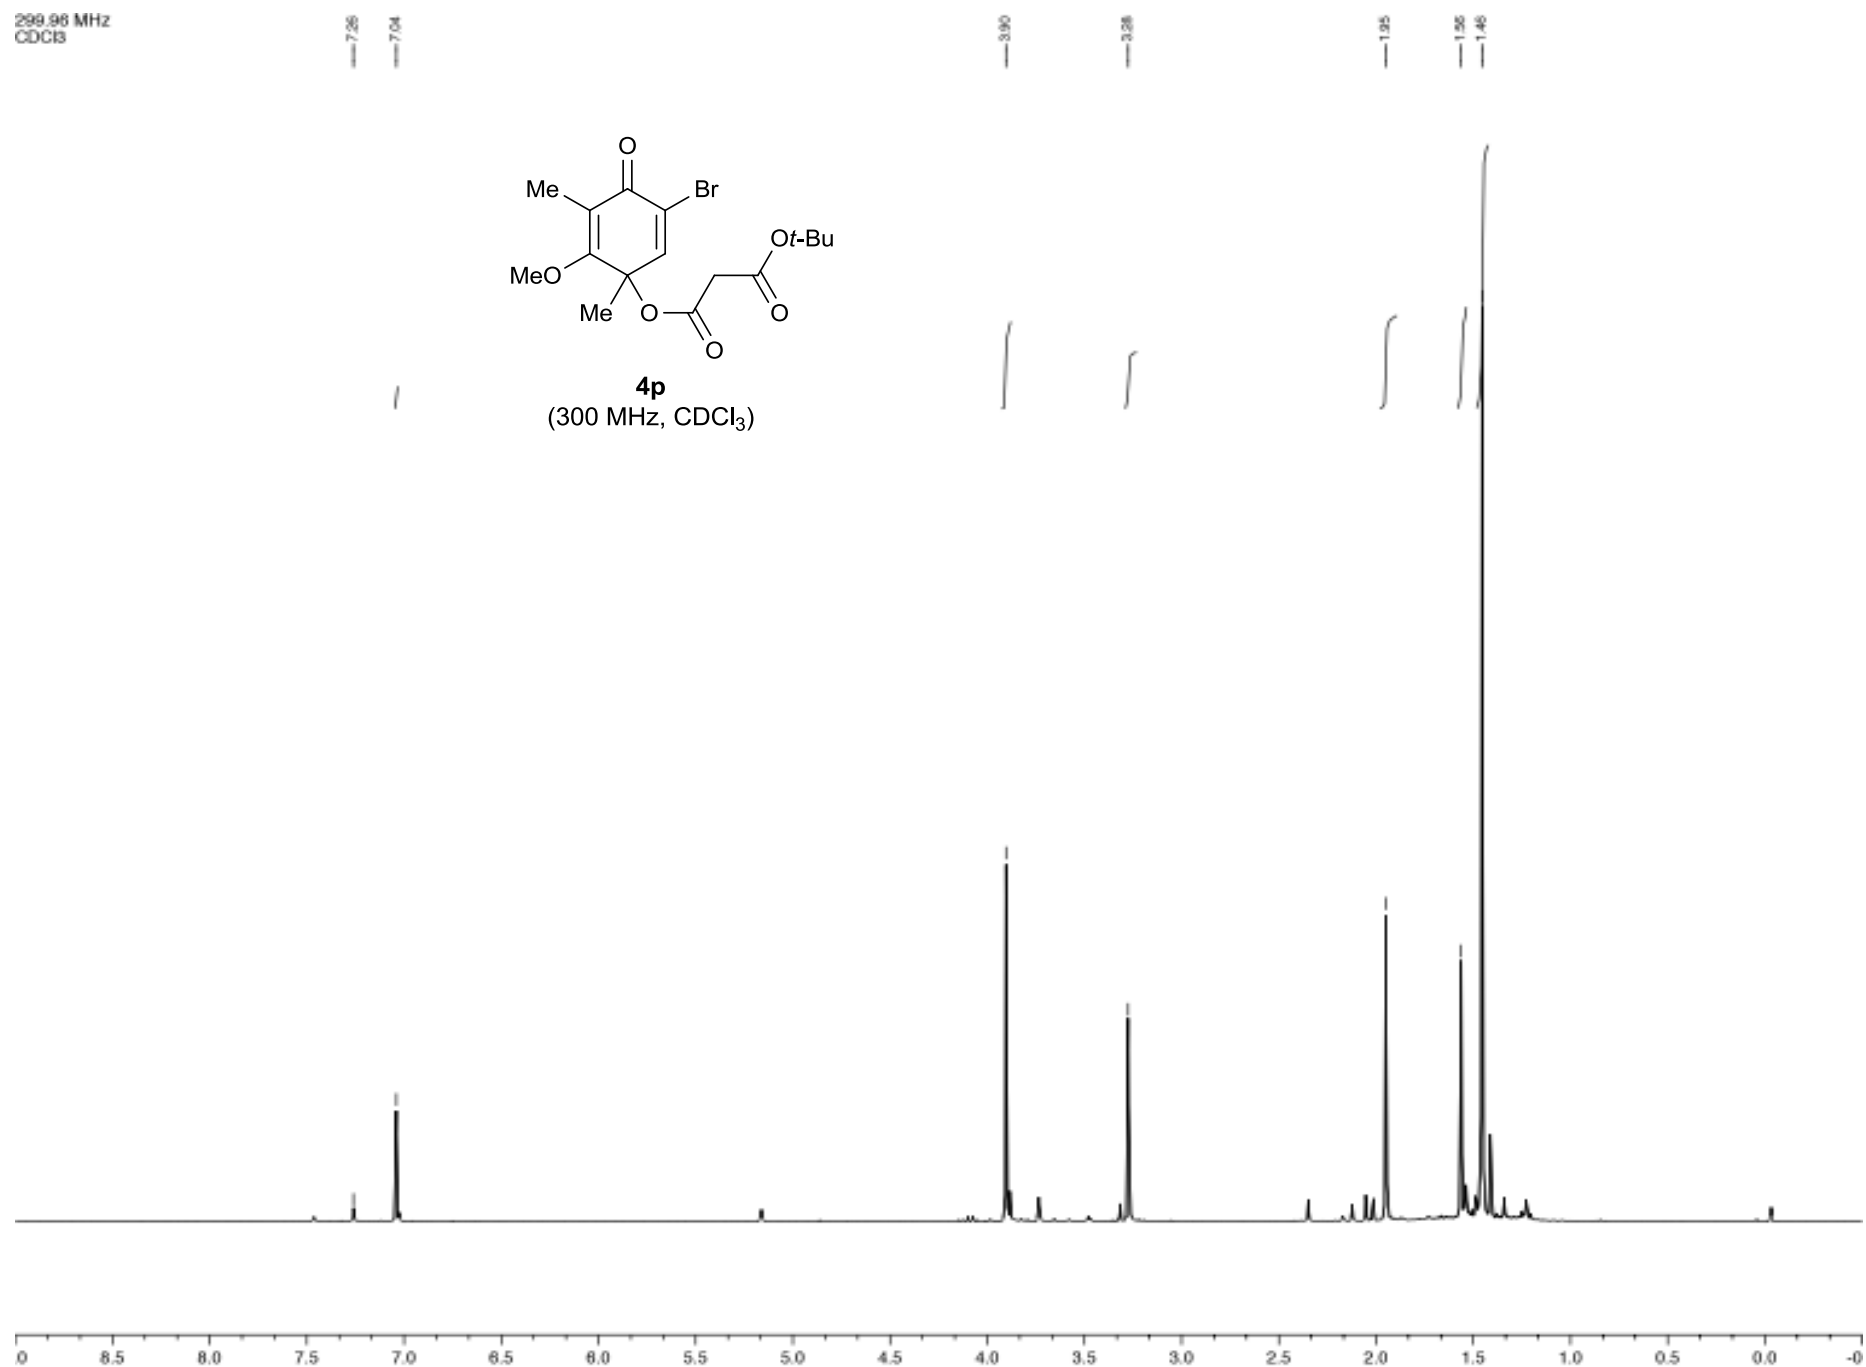

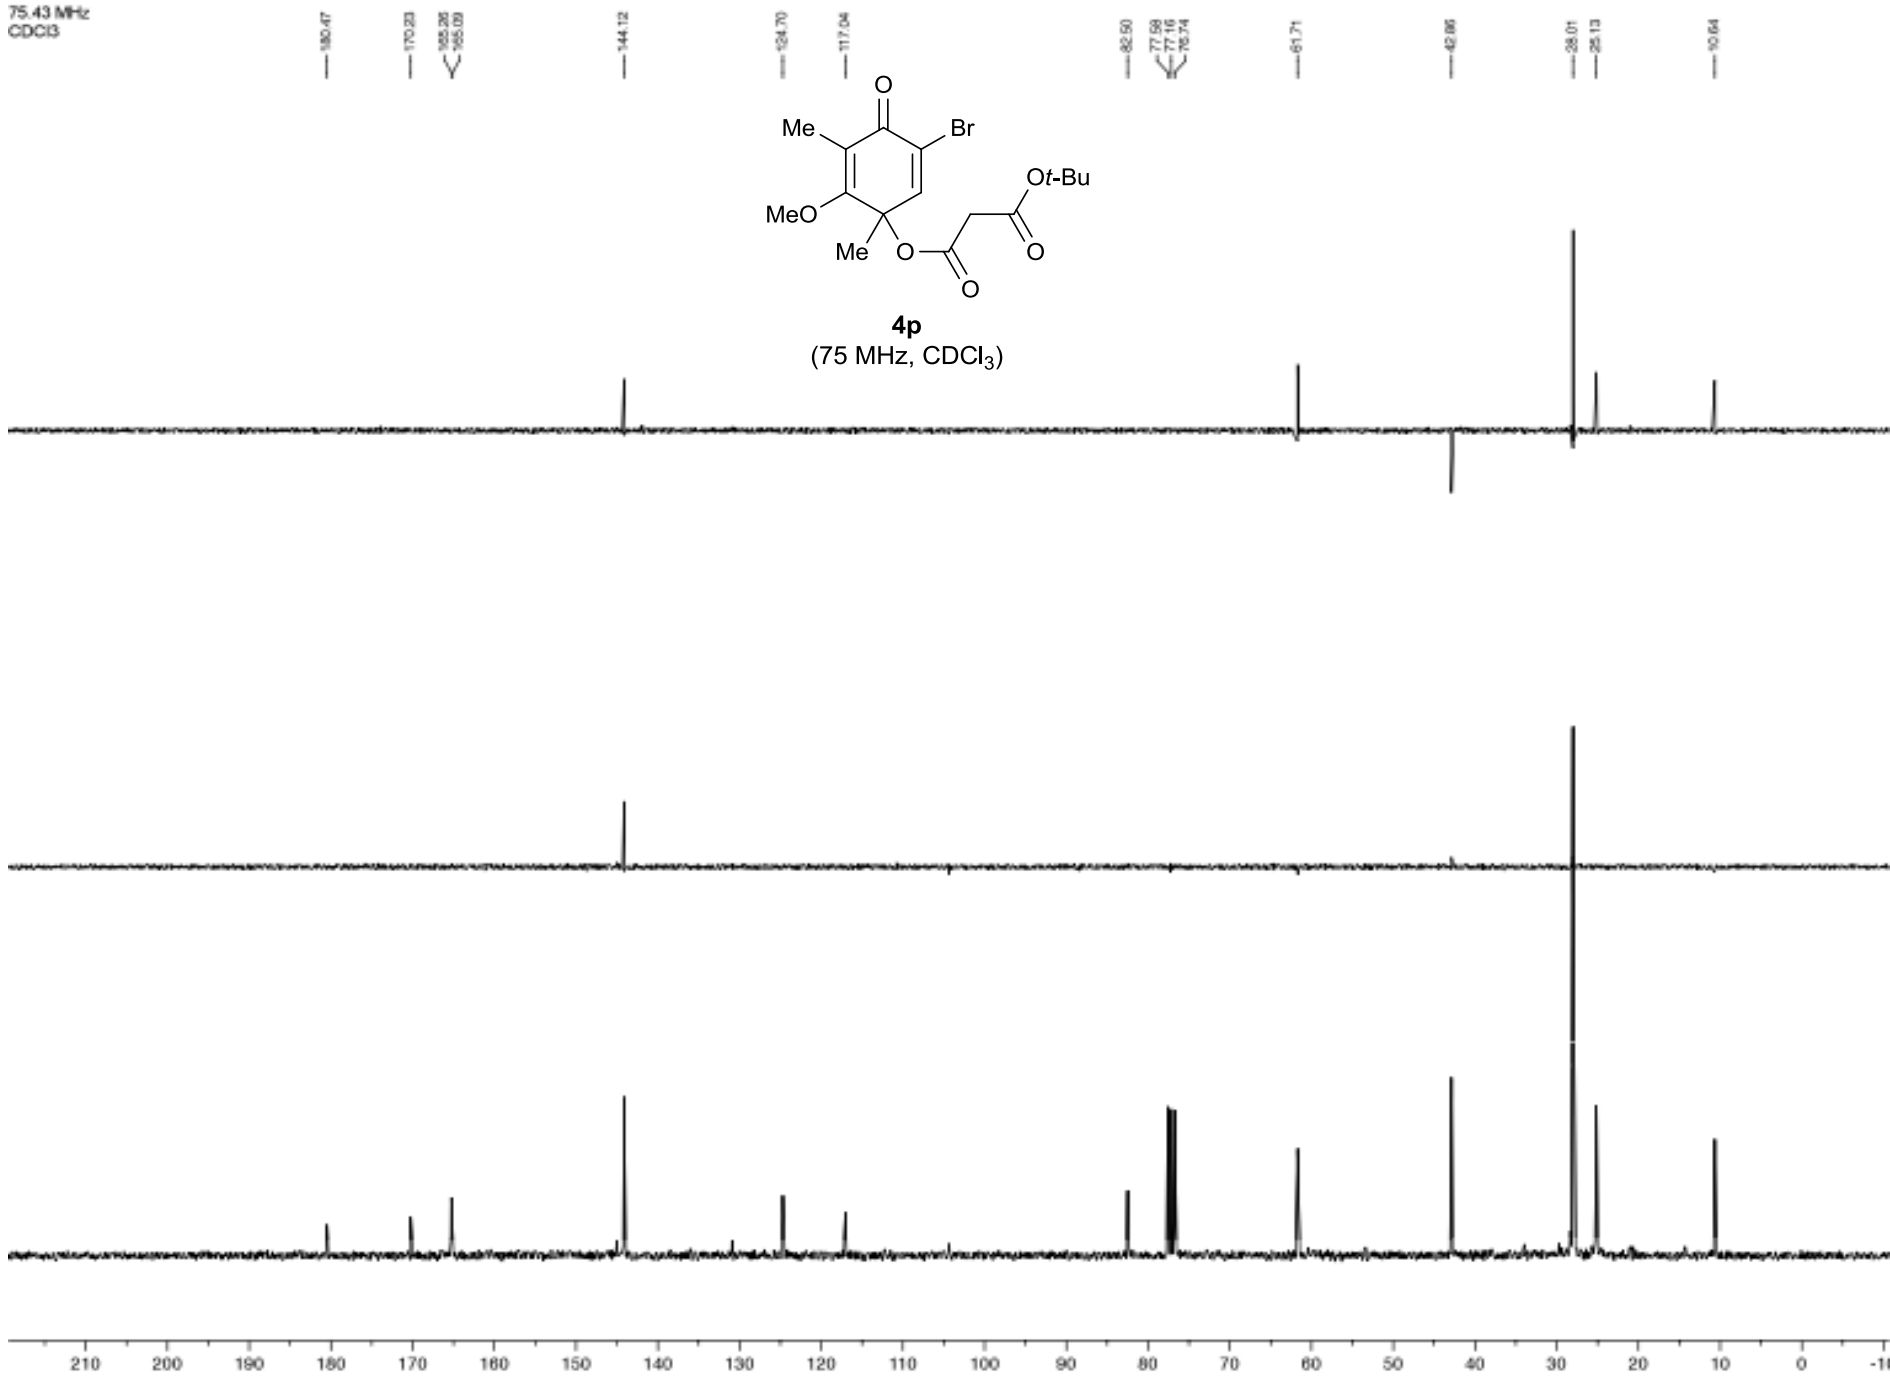

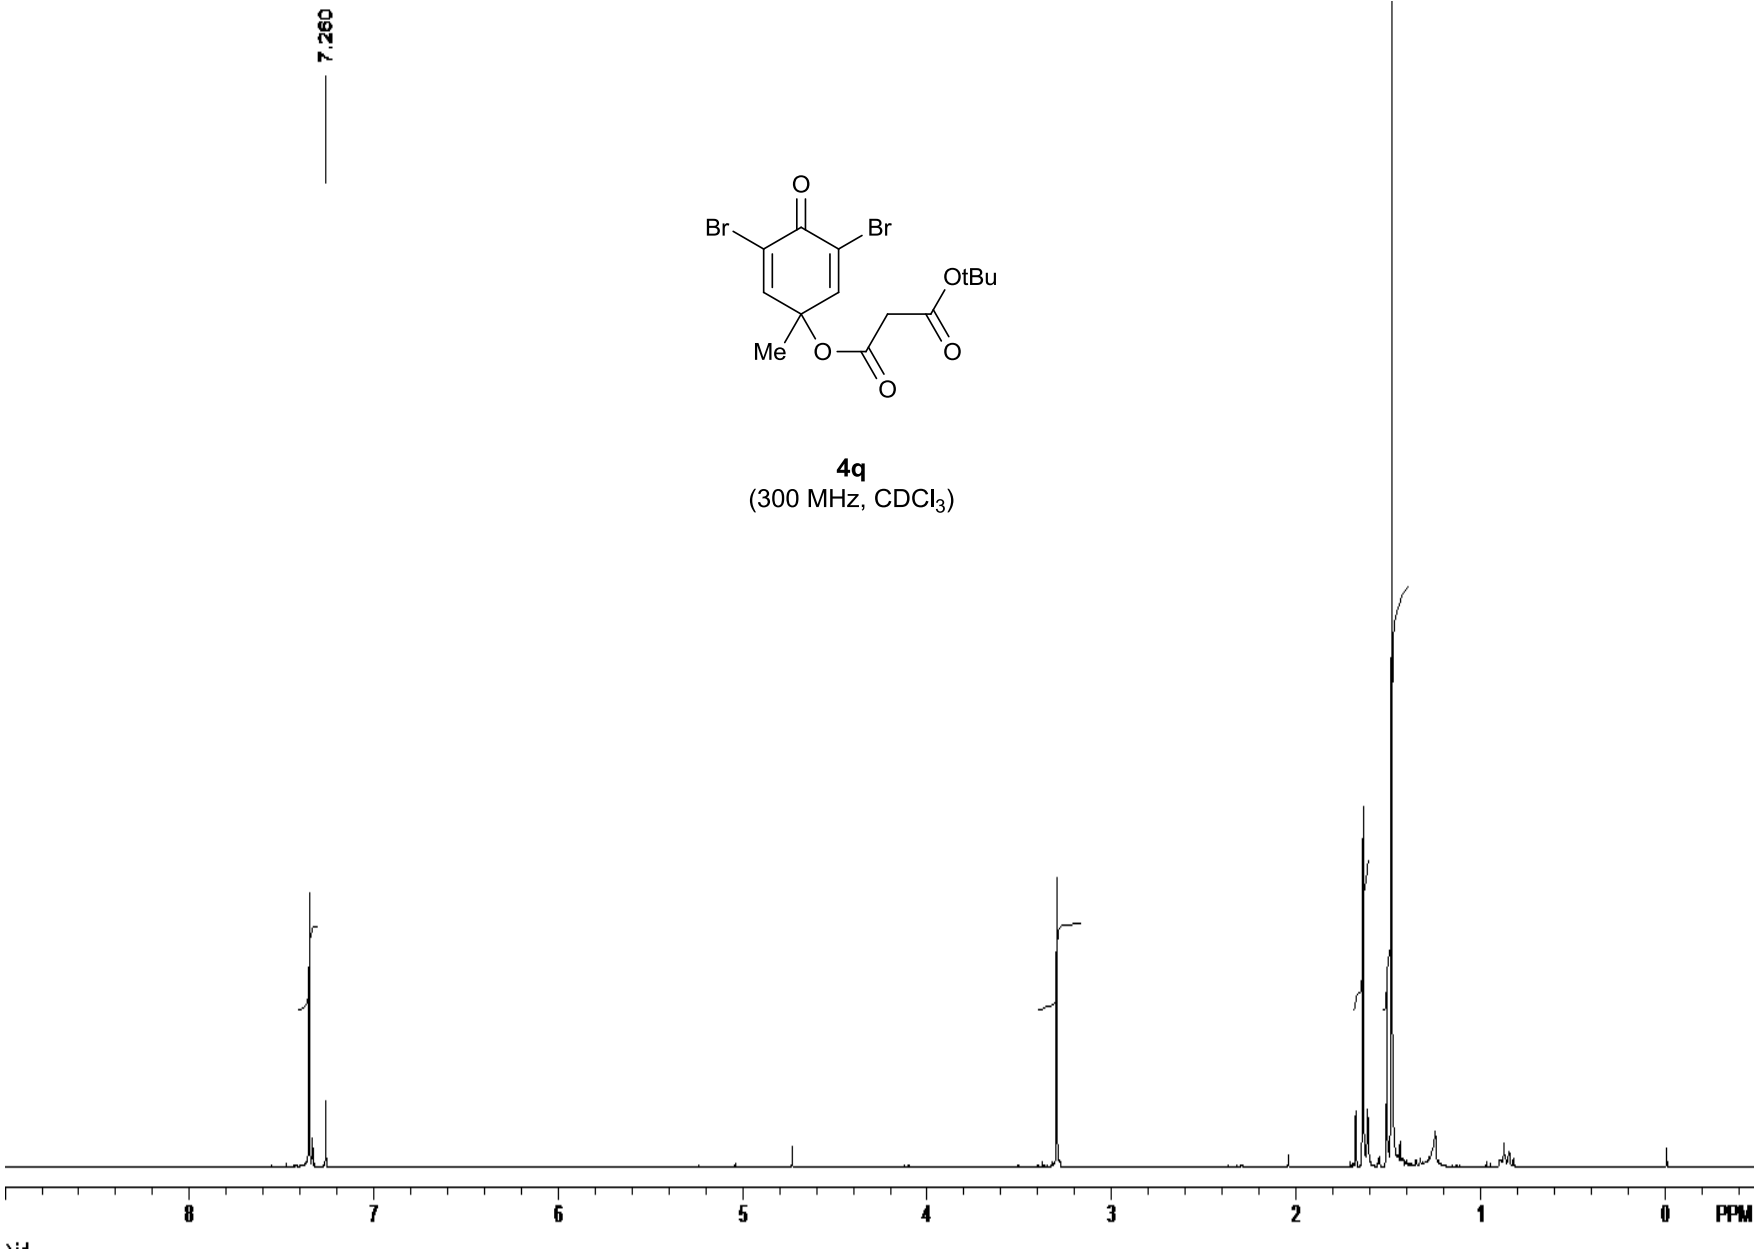

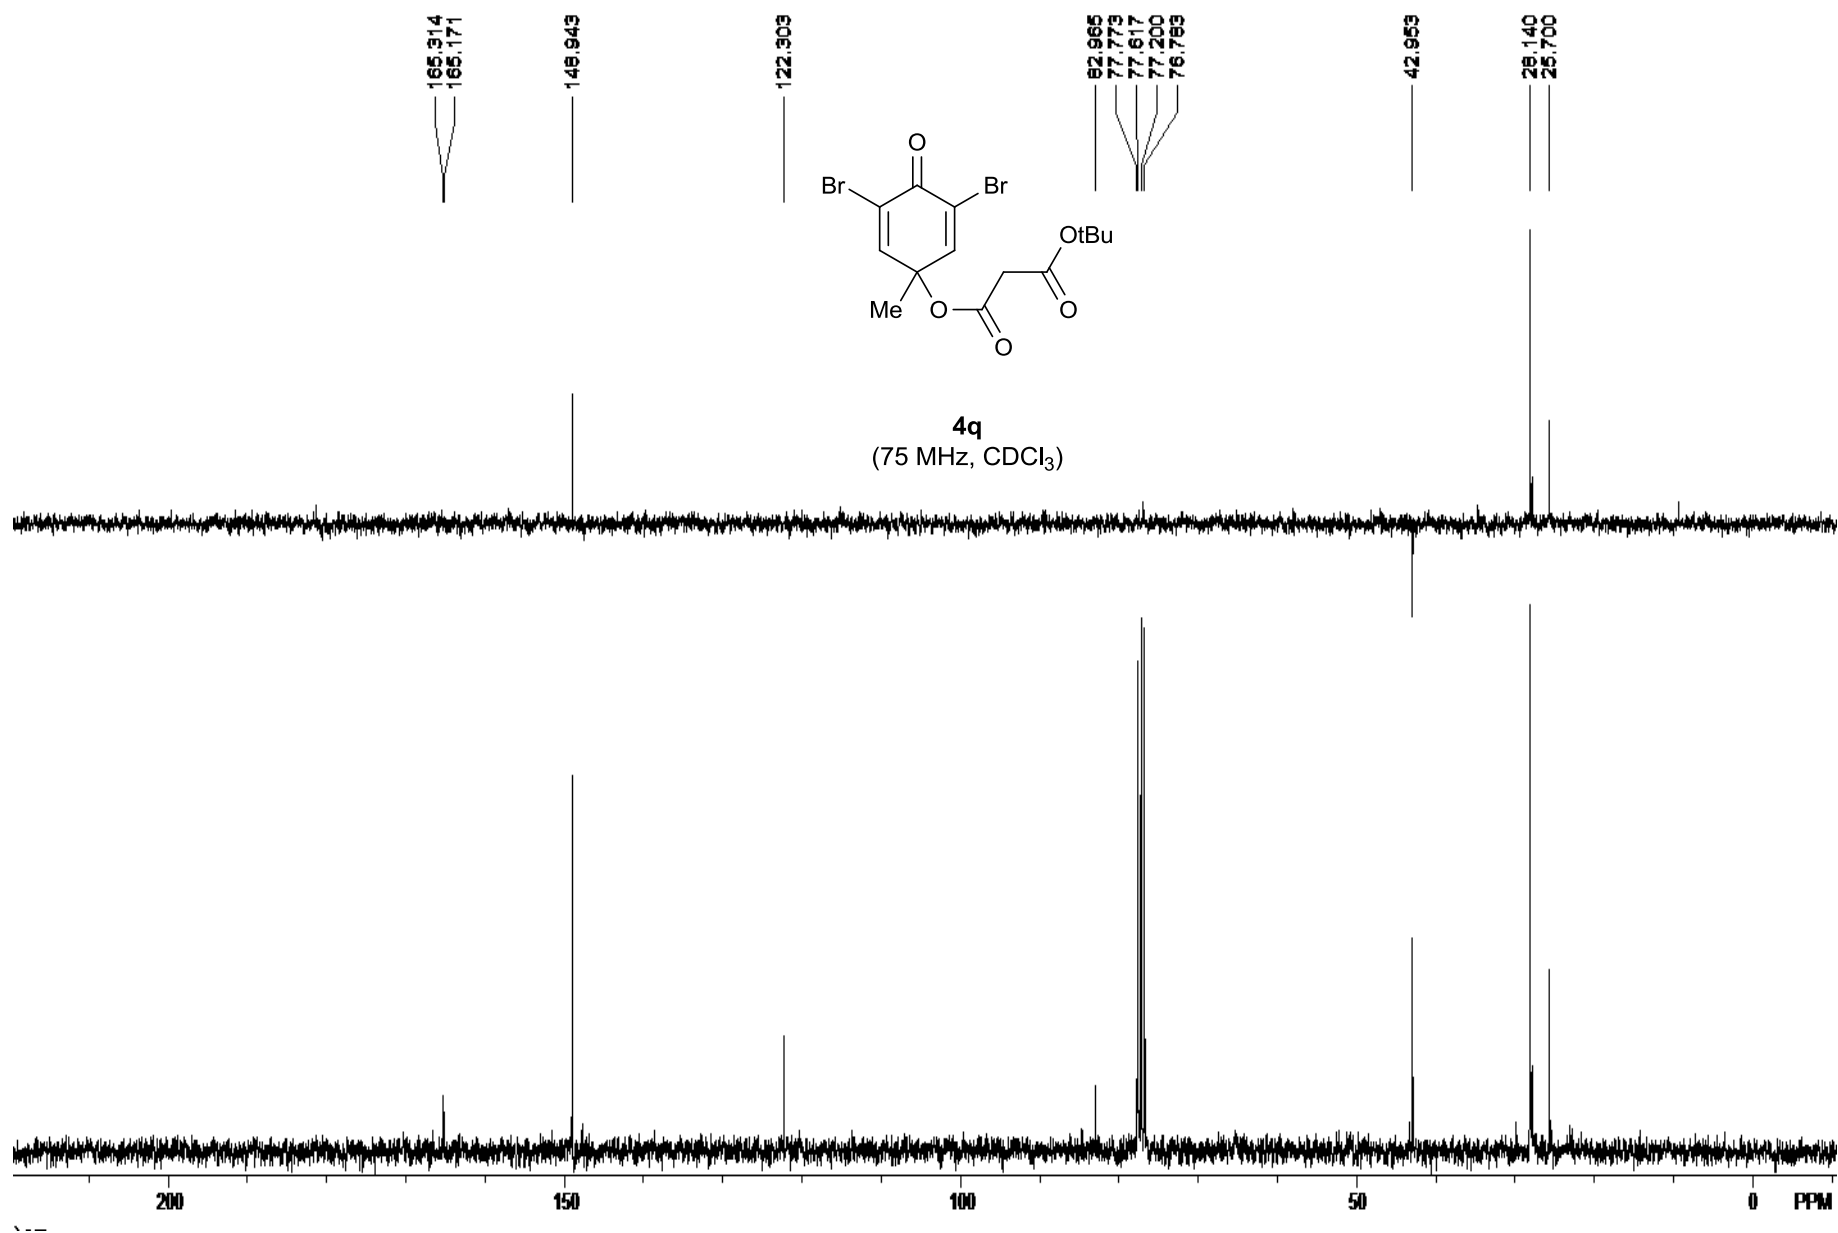

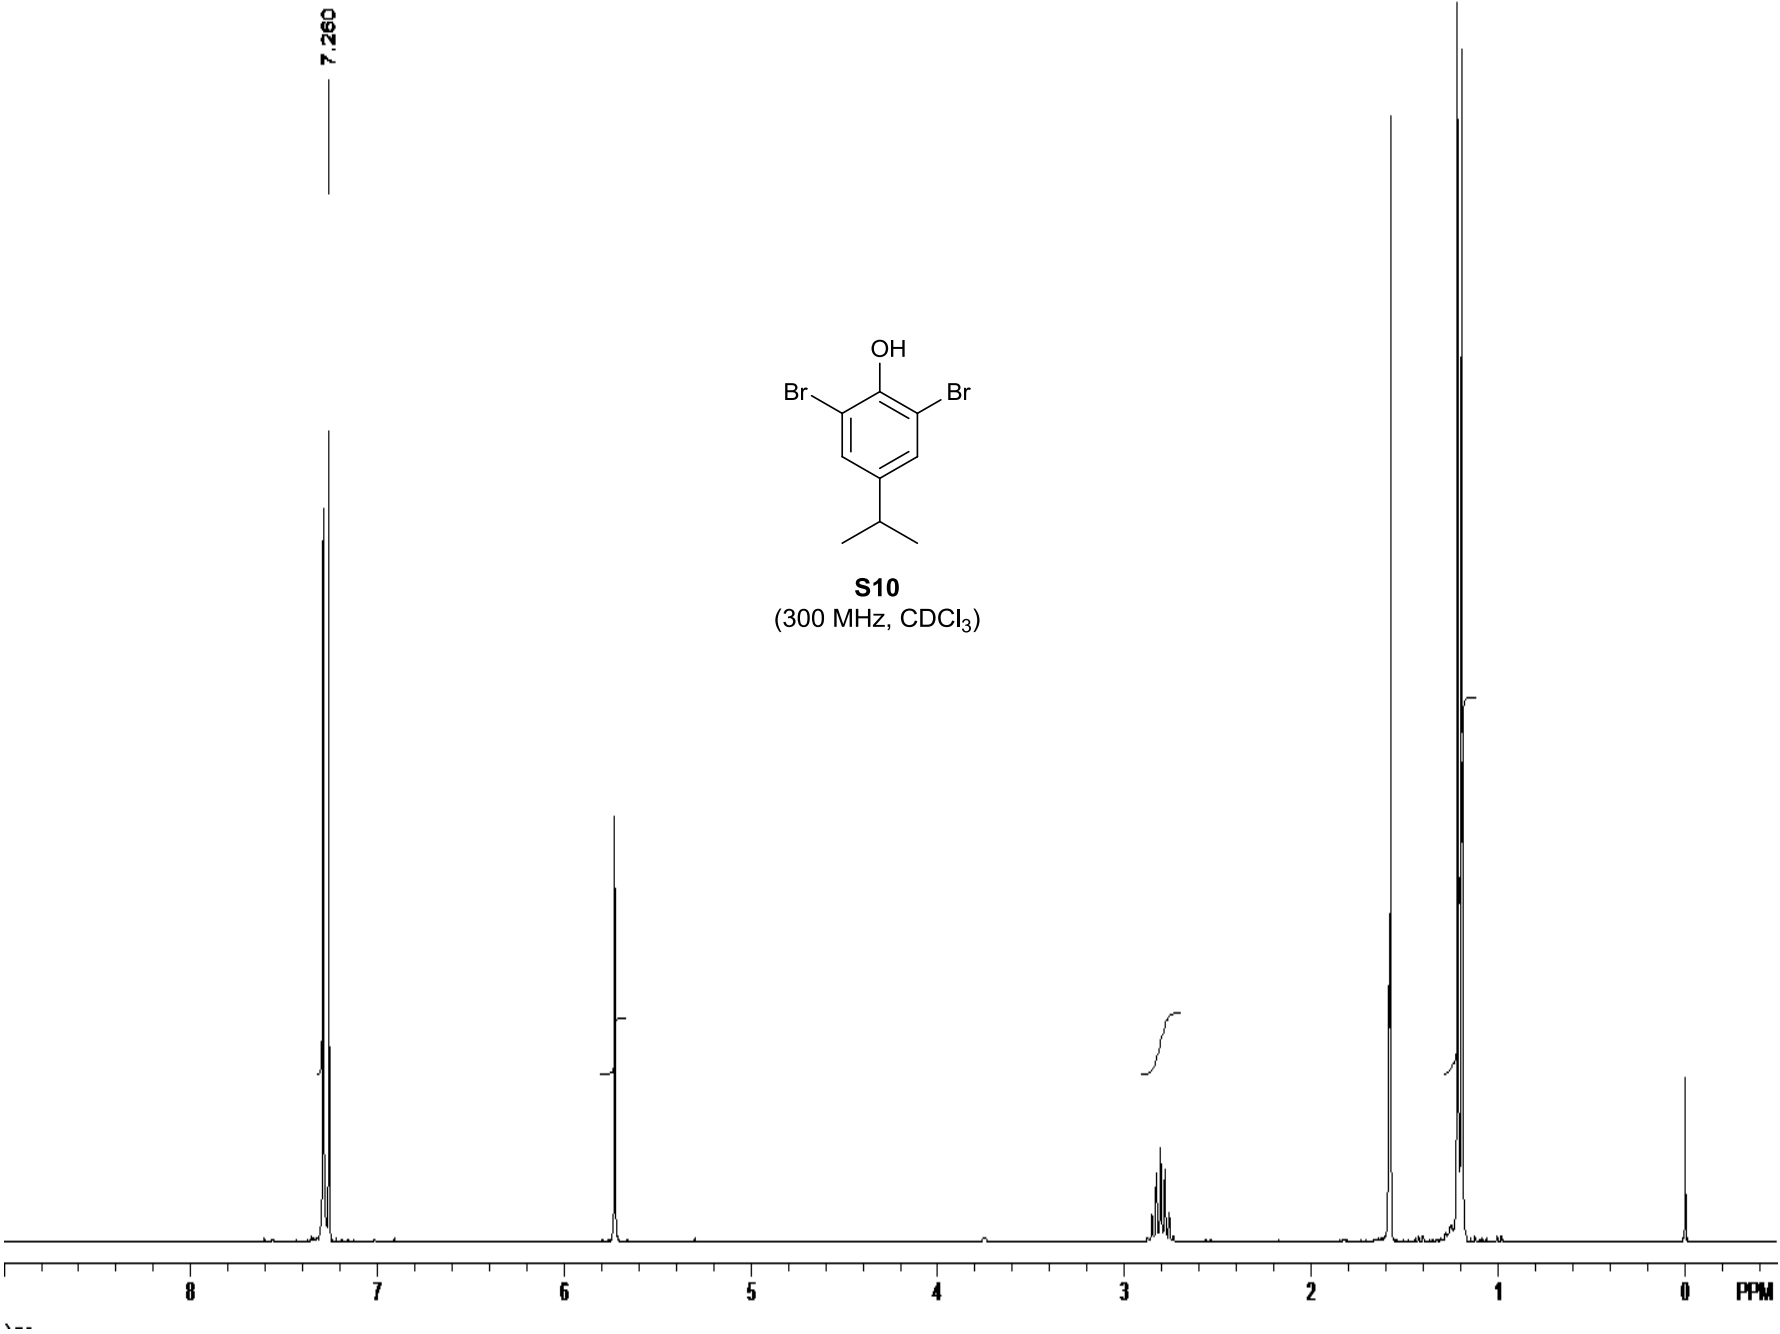

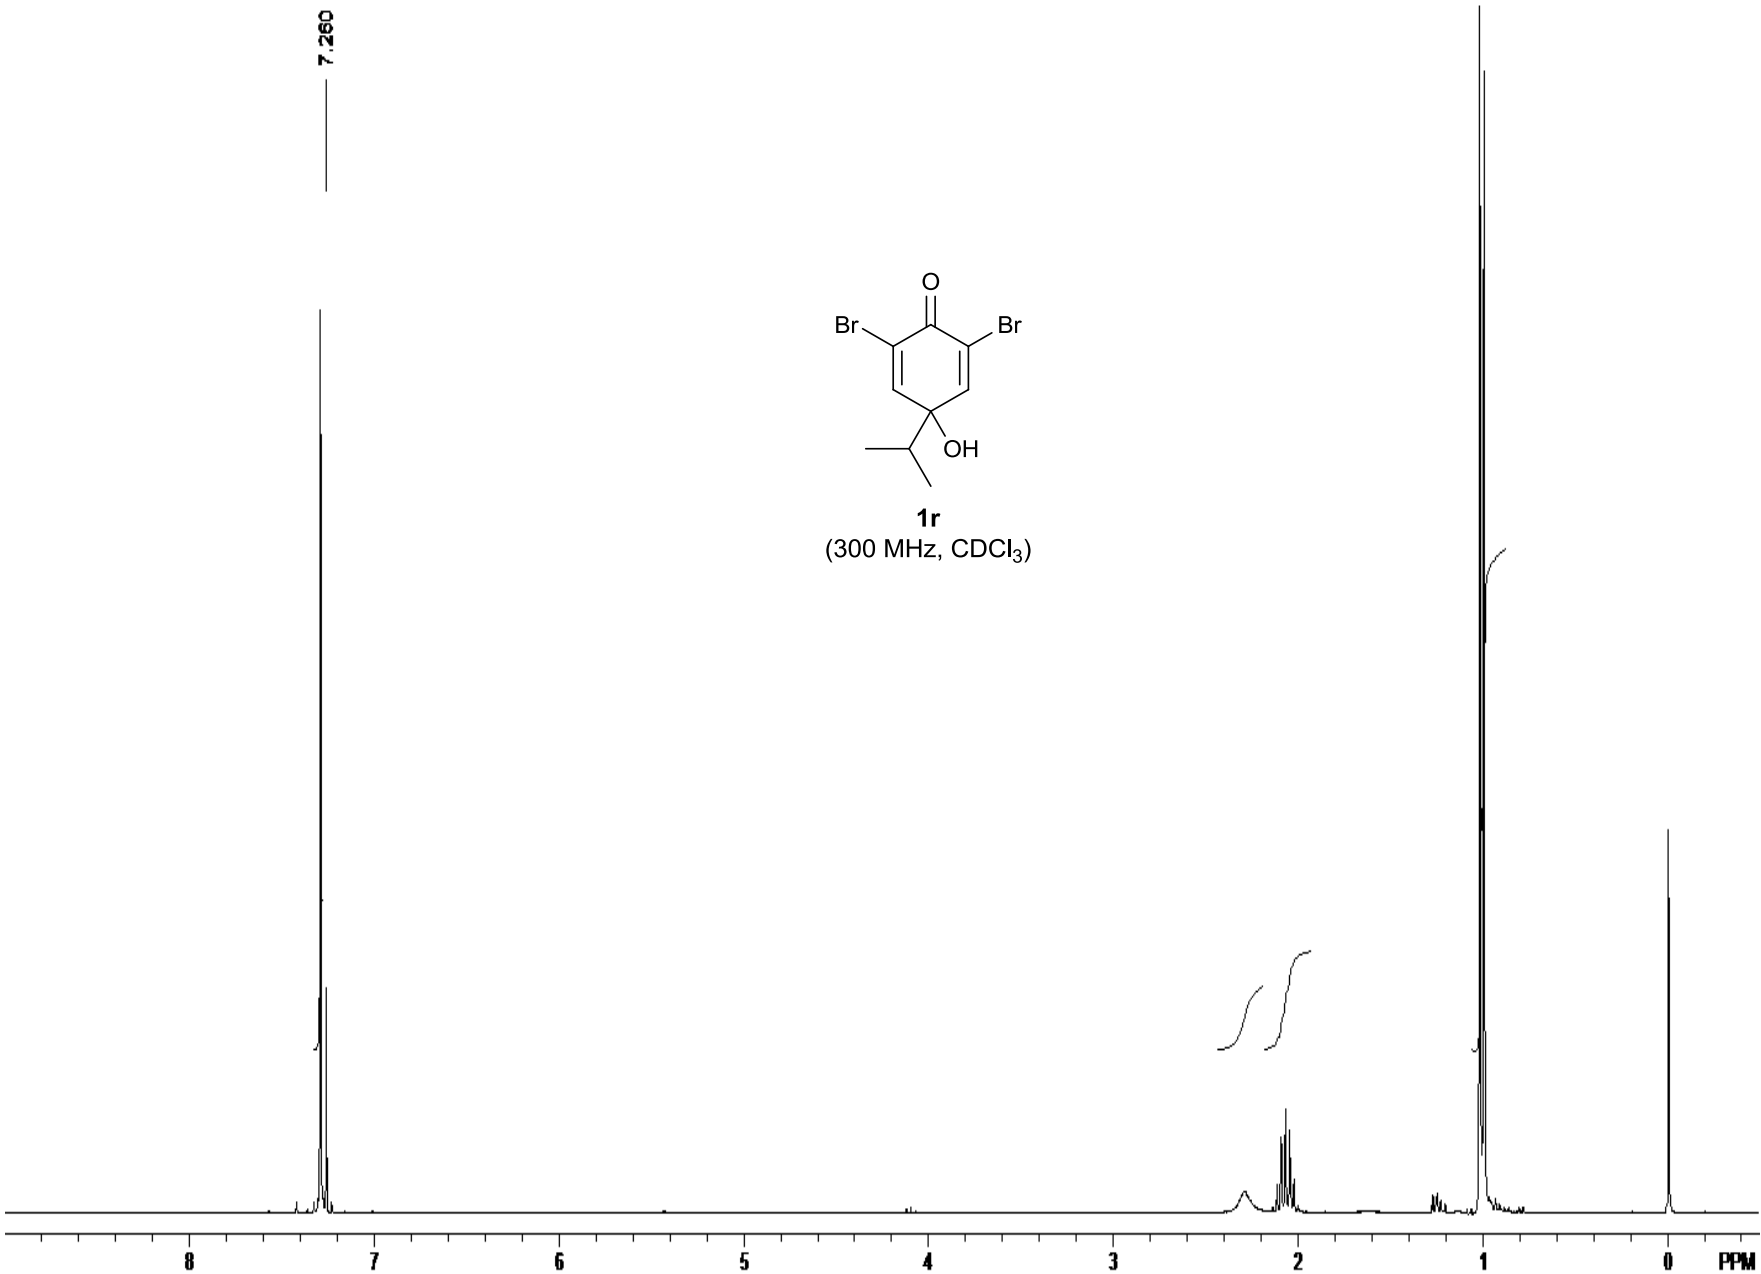



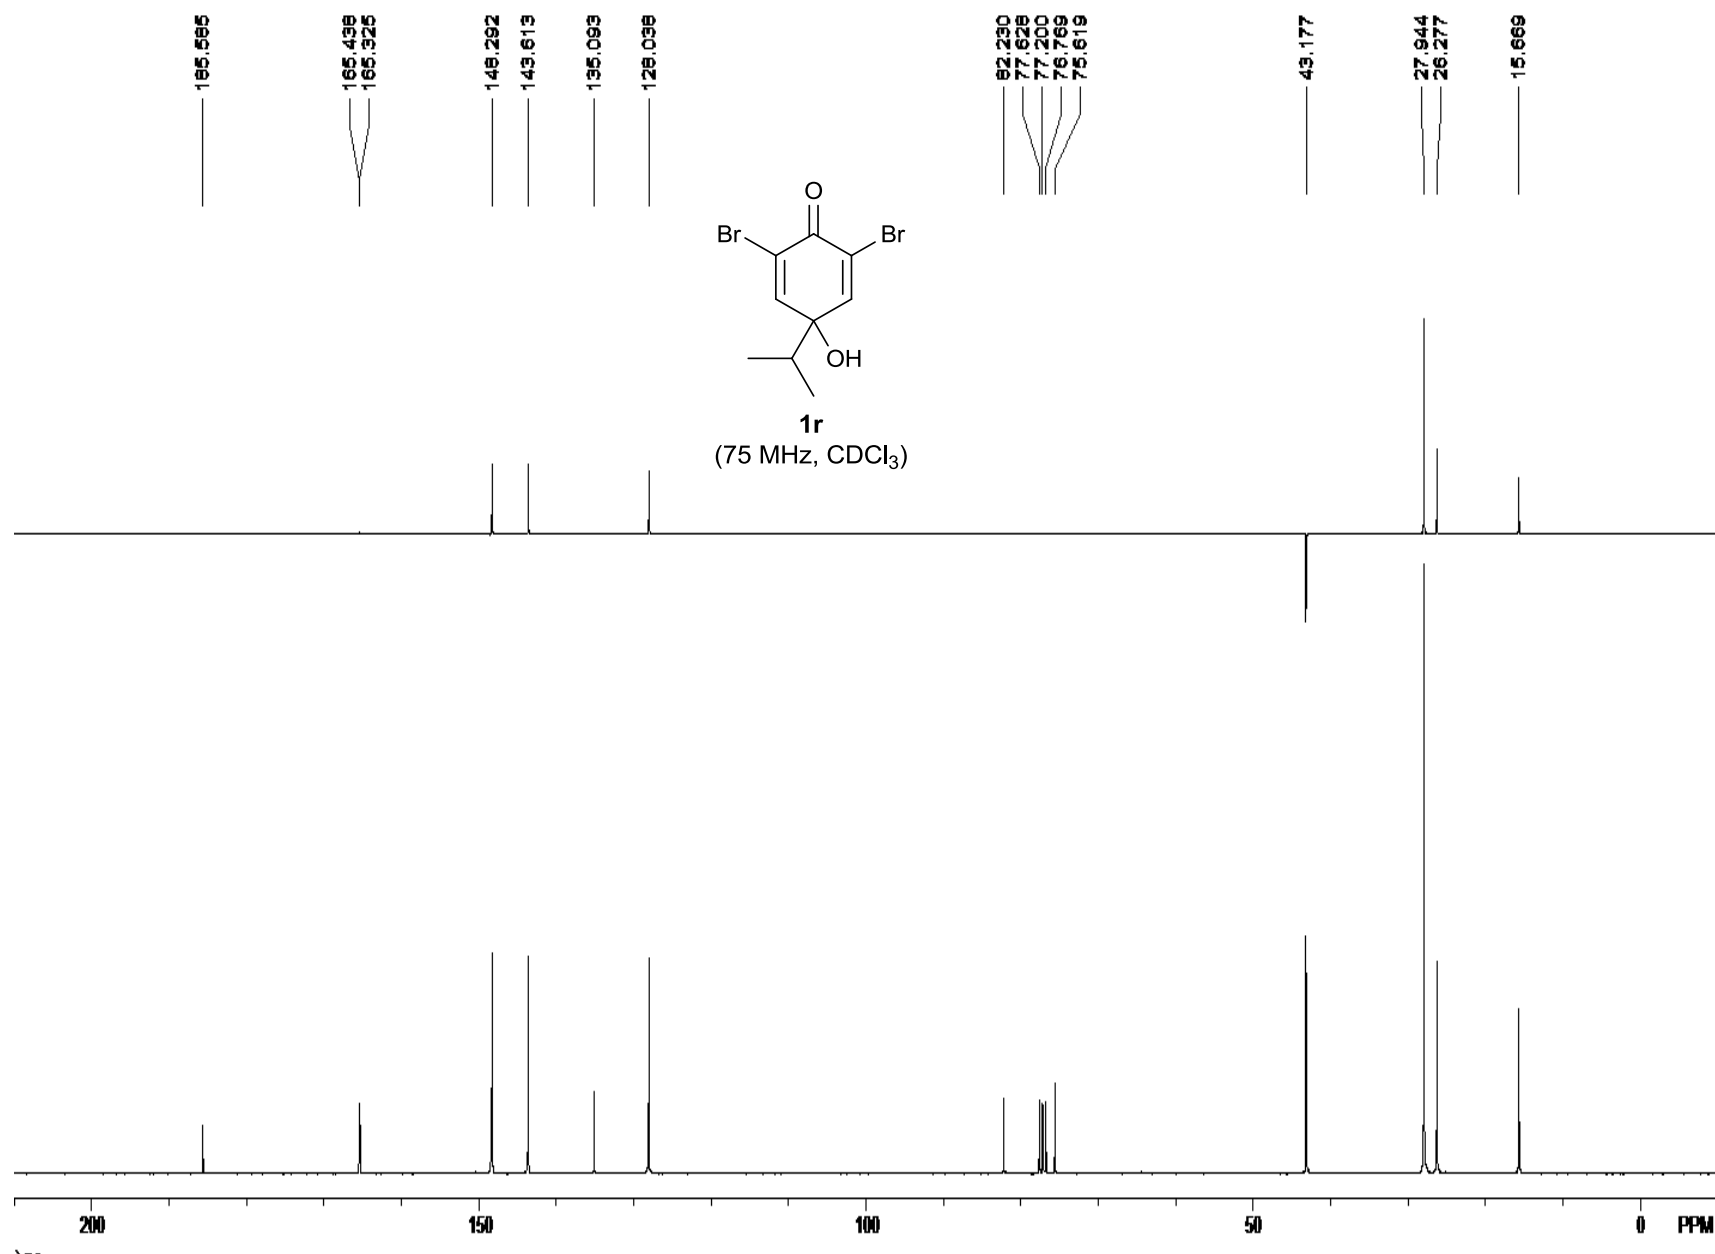

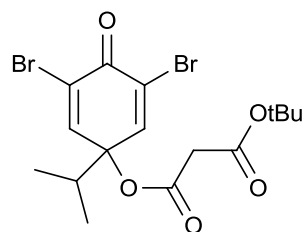

**4r**  
(300 MHz, CDCl<sub>3</sub>)

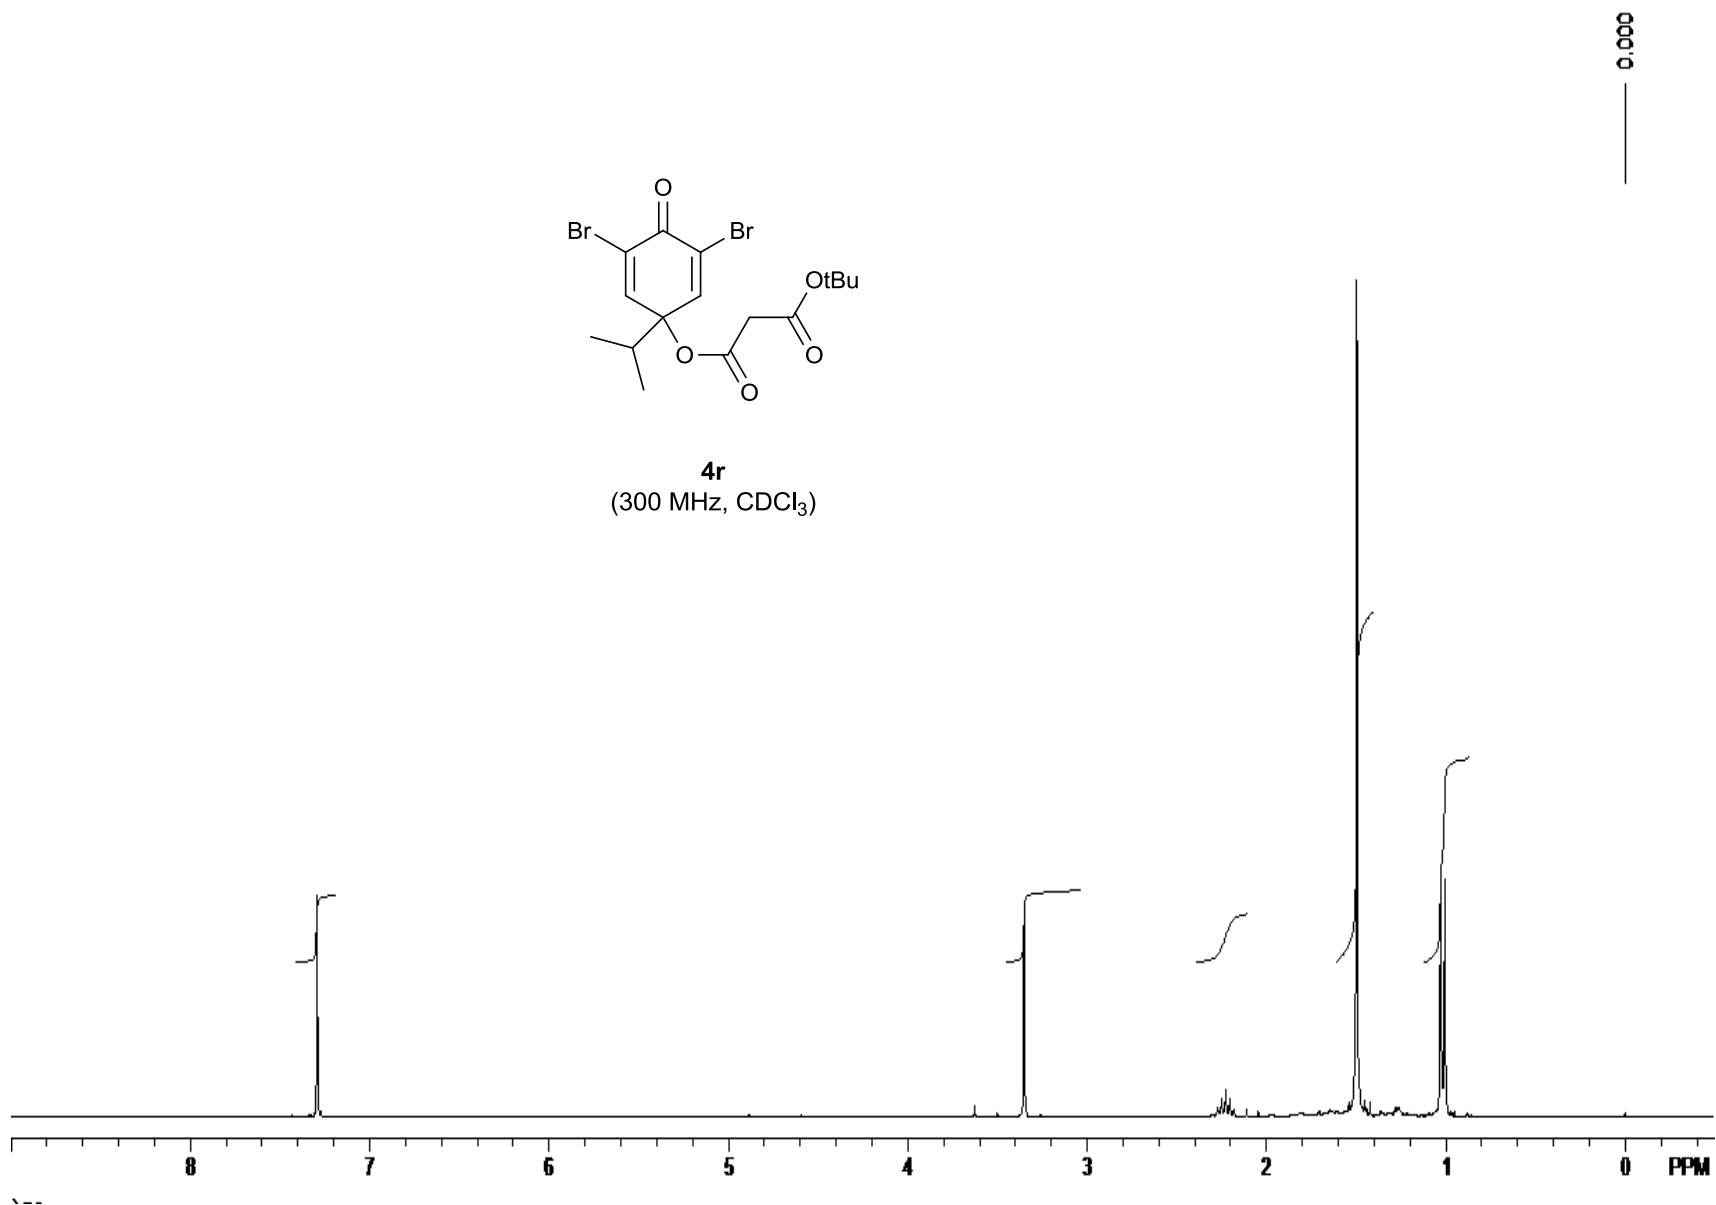

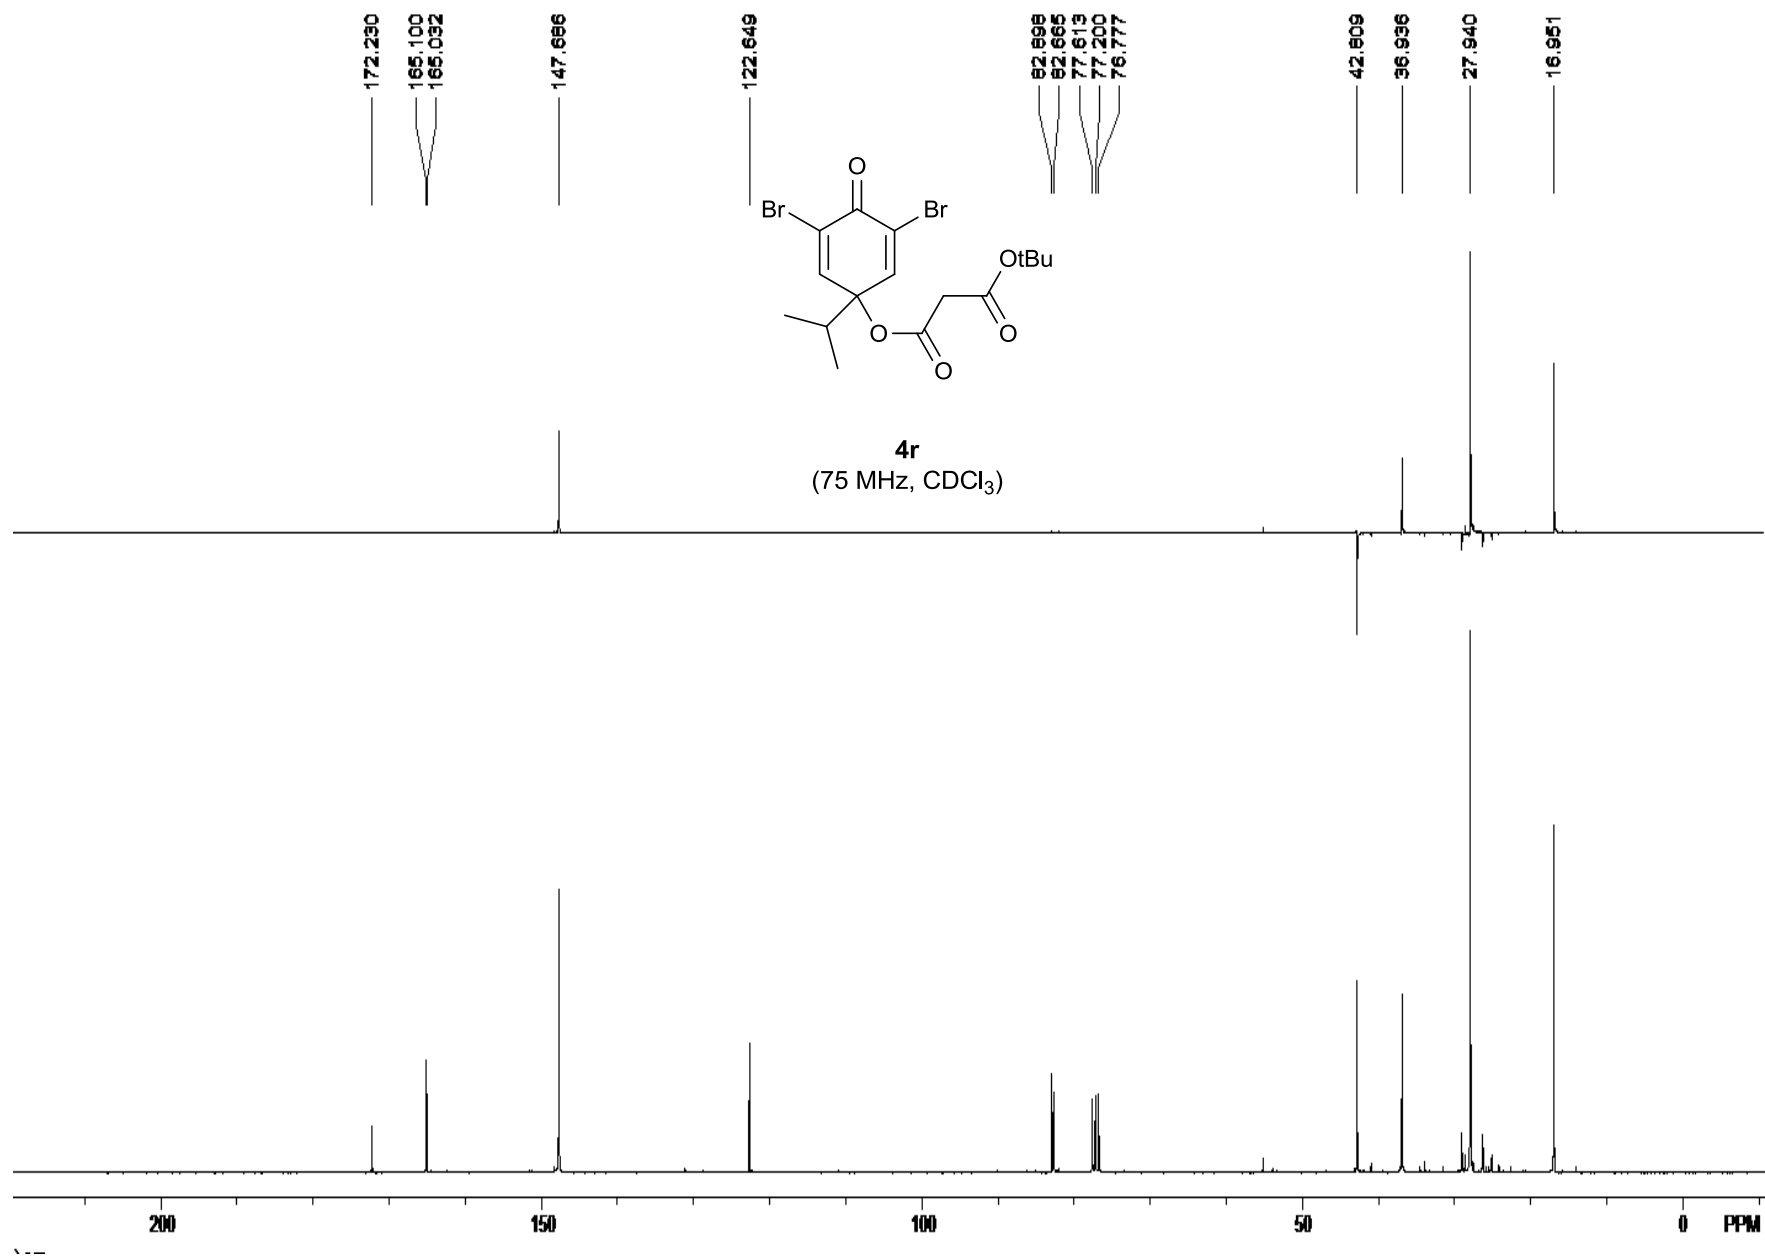

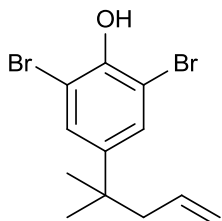

**S11**  
(300 MHz, CDCl<sub>3</sub>)

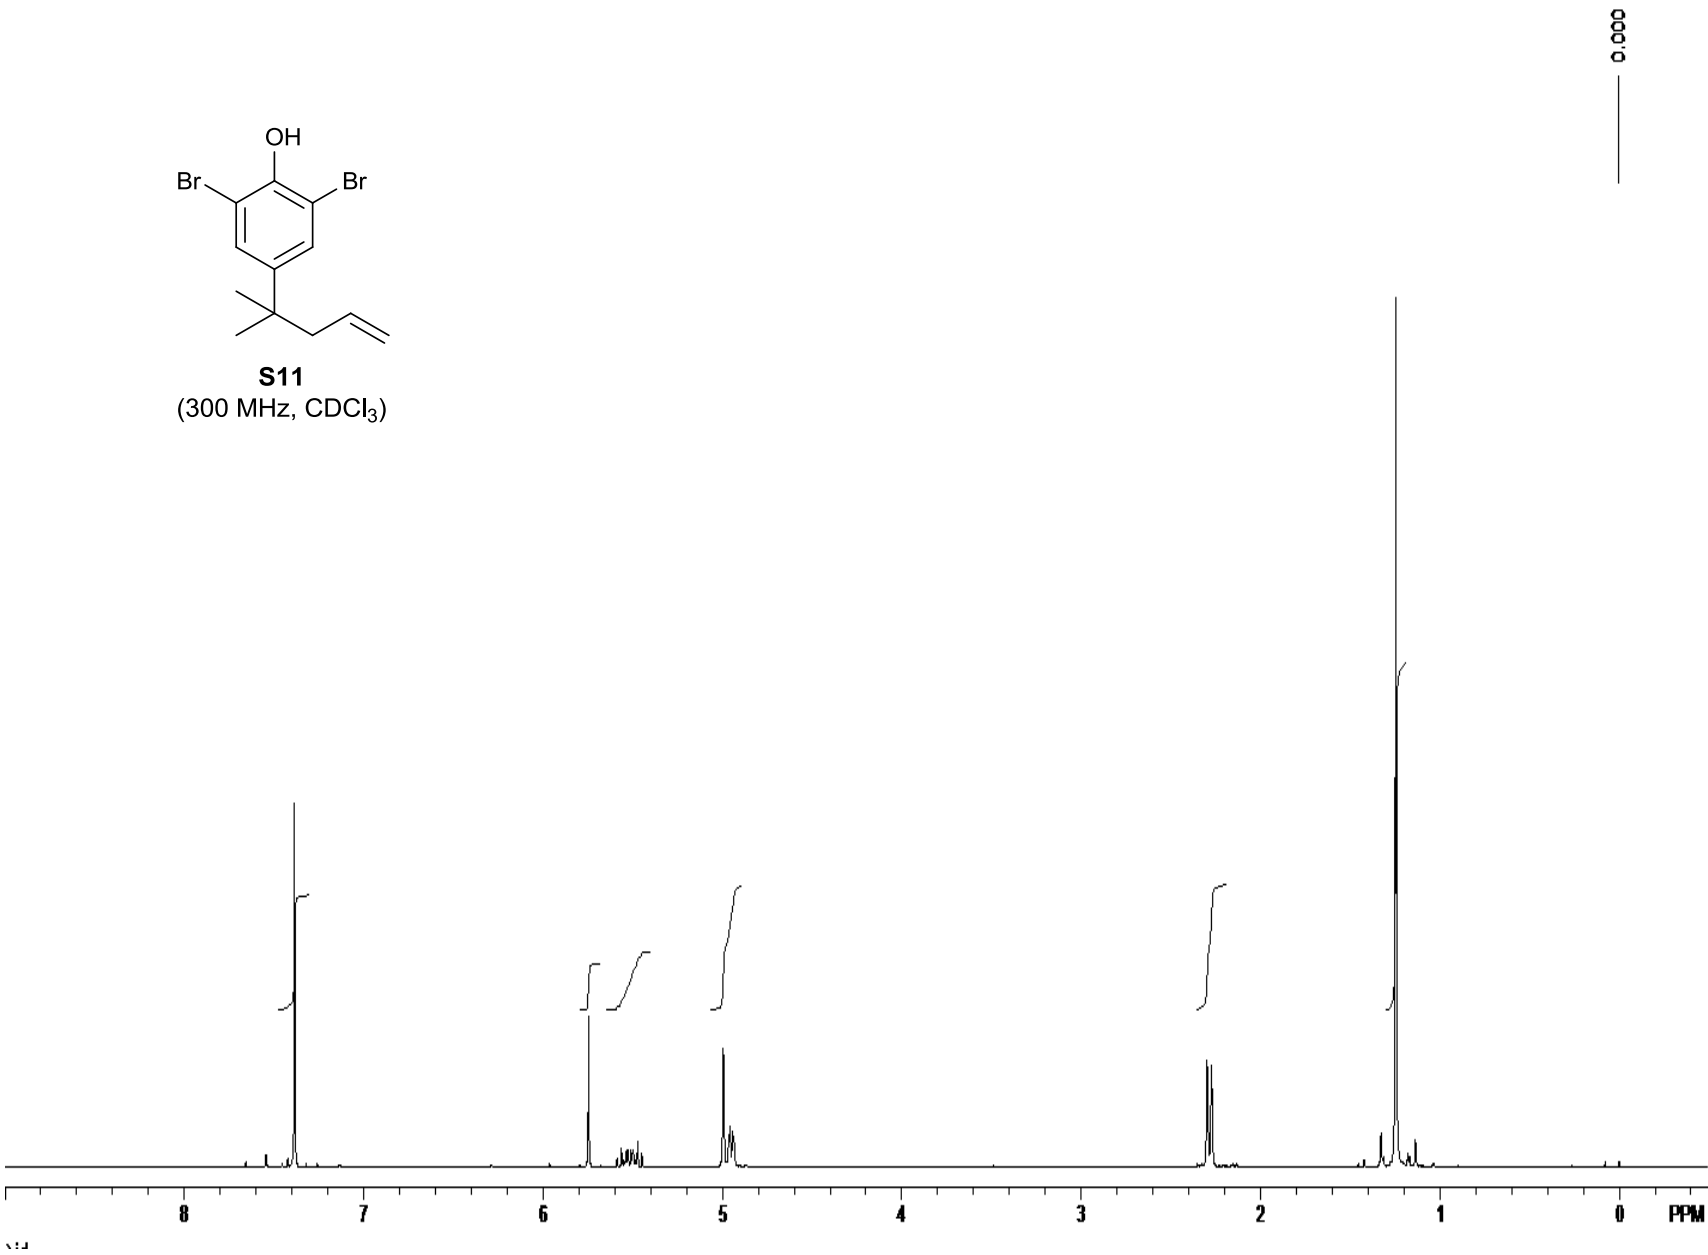

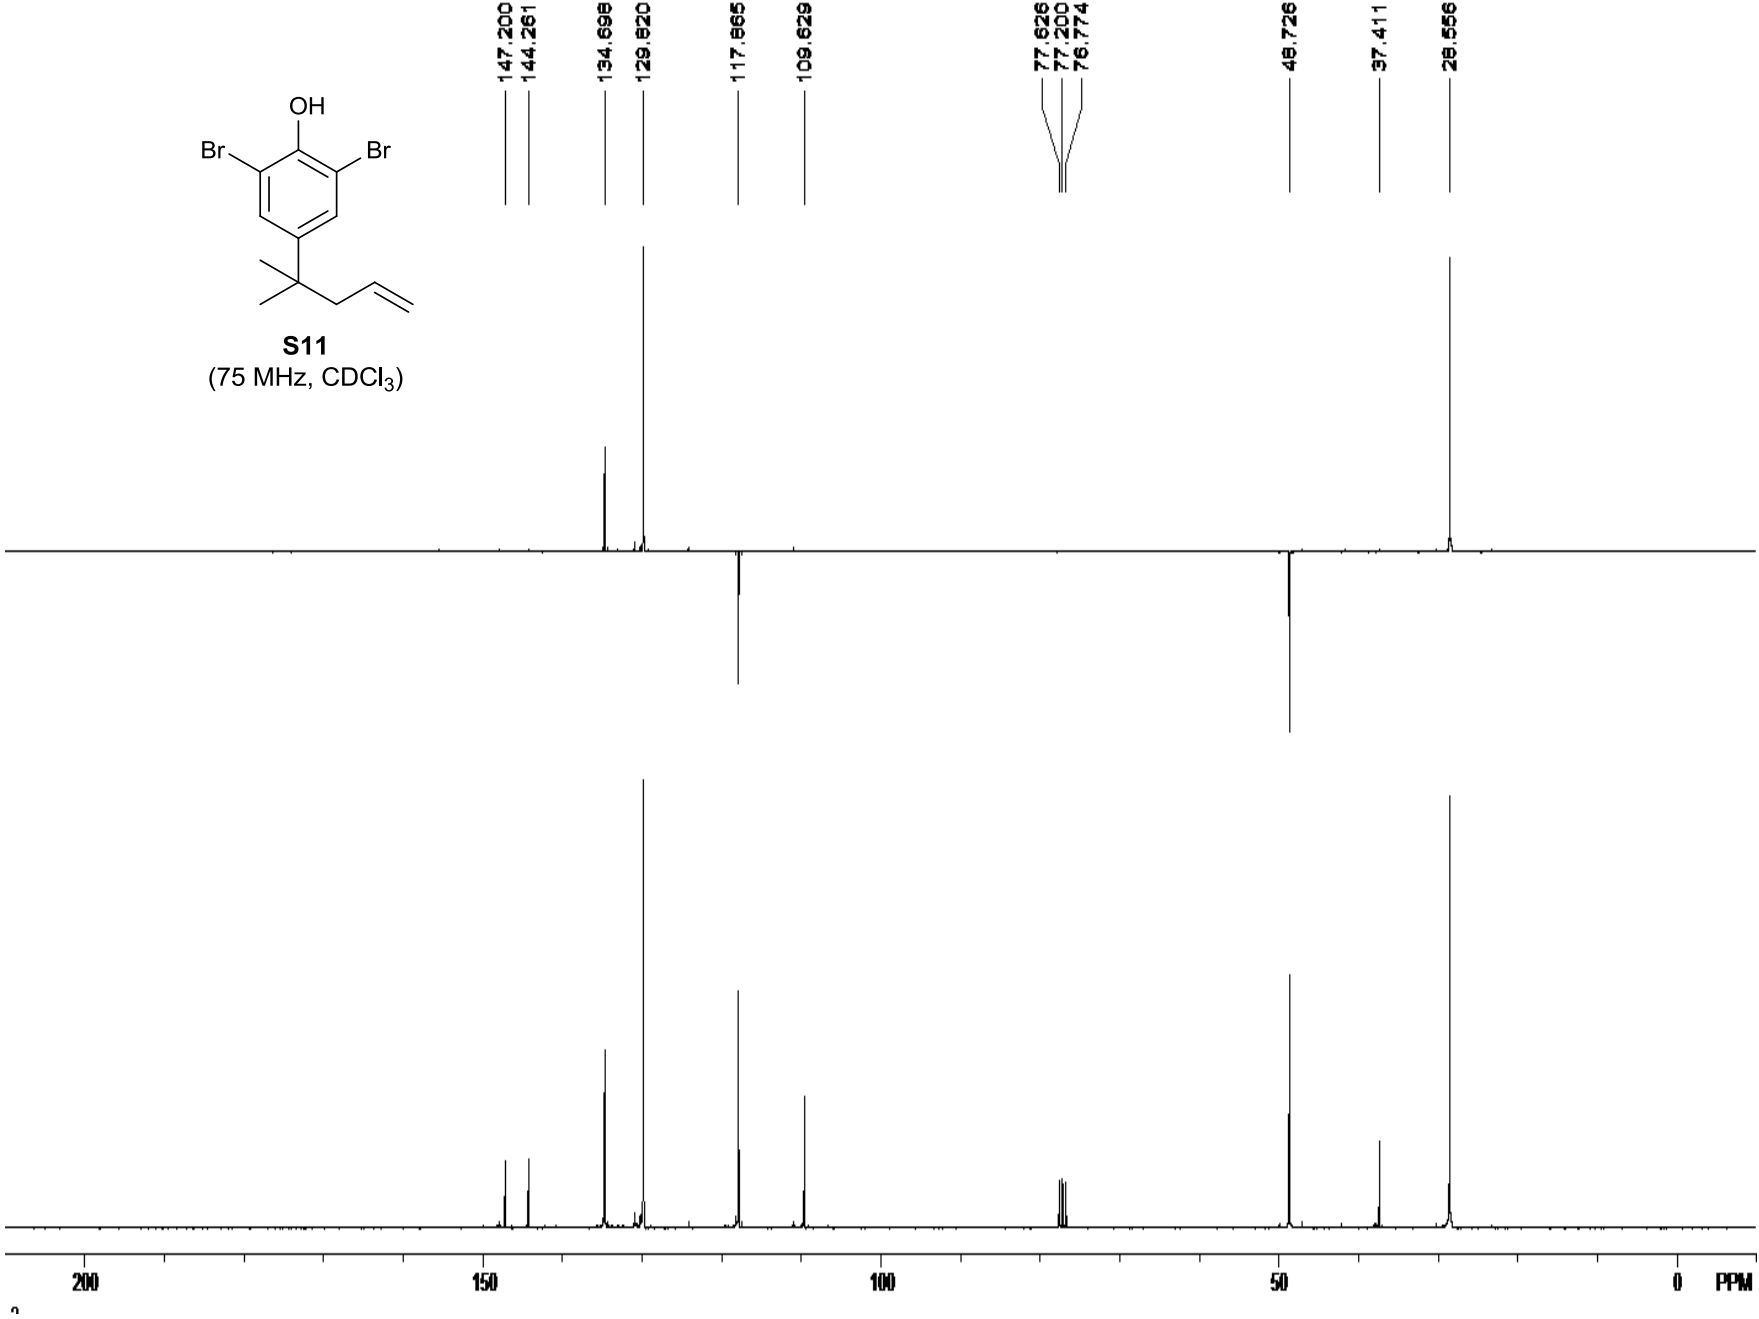

0.000

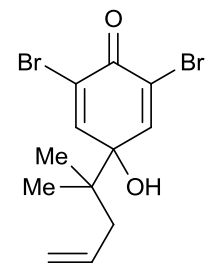

**1s**  
(300 MHz, CDCl<sub>3</sub>)

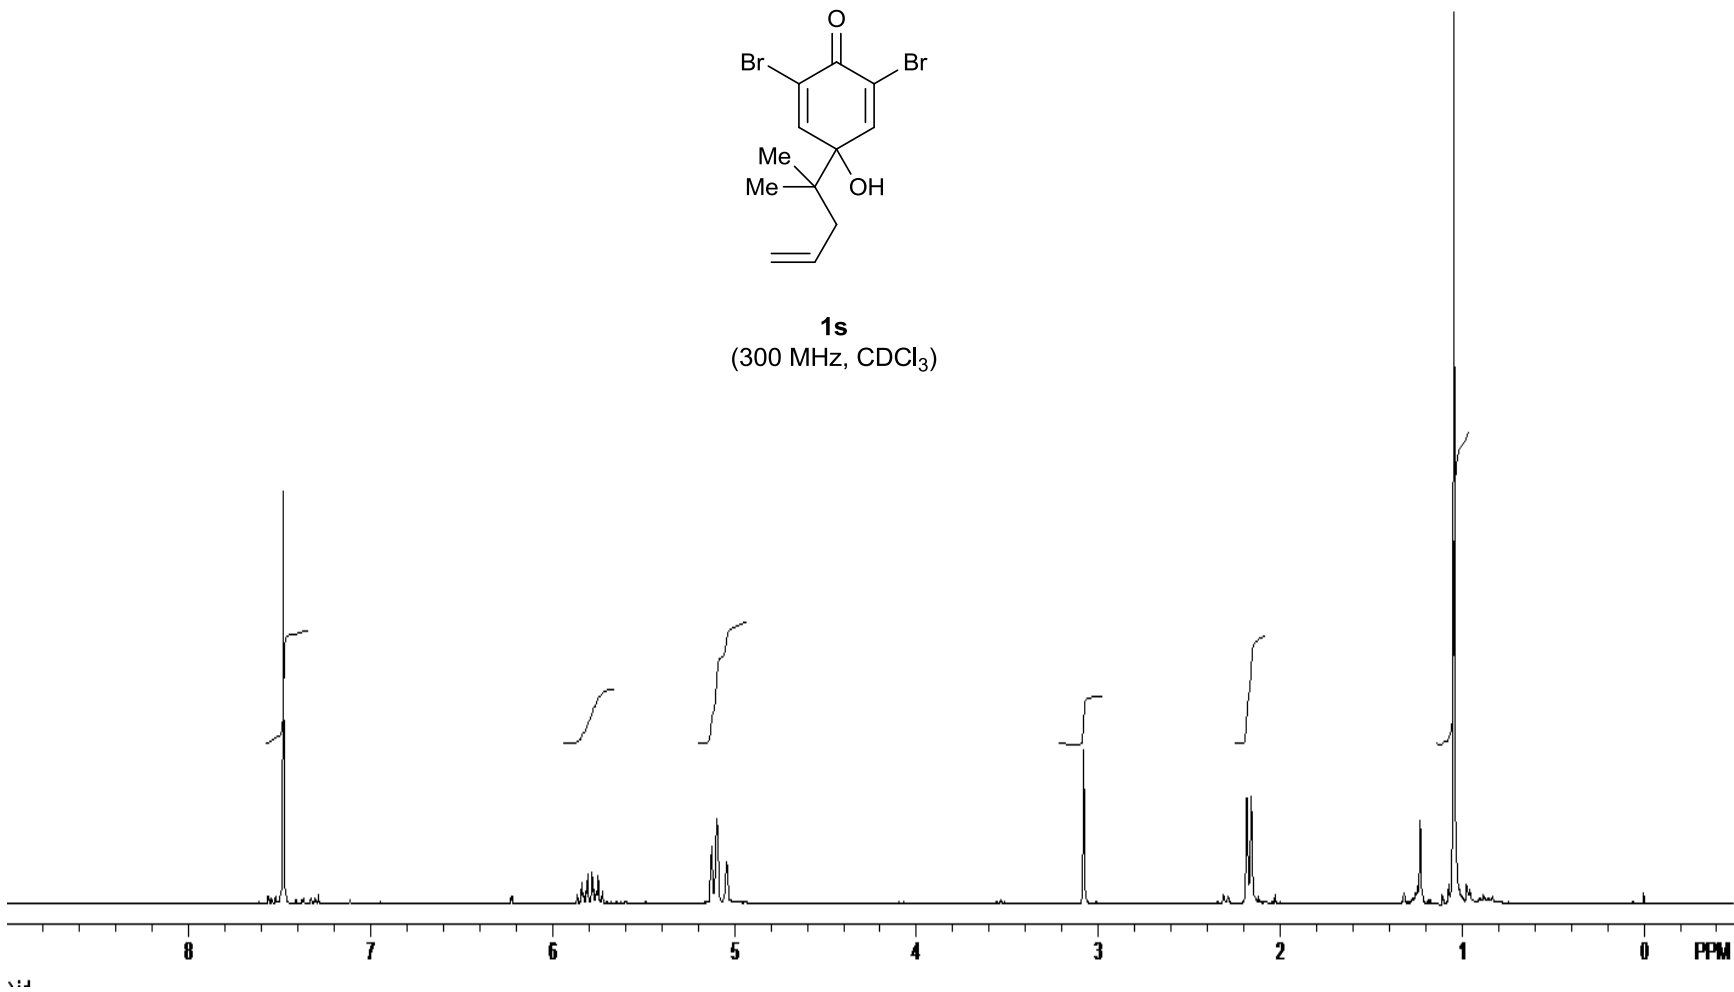

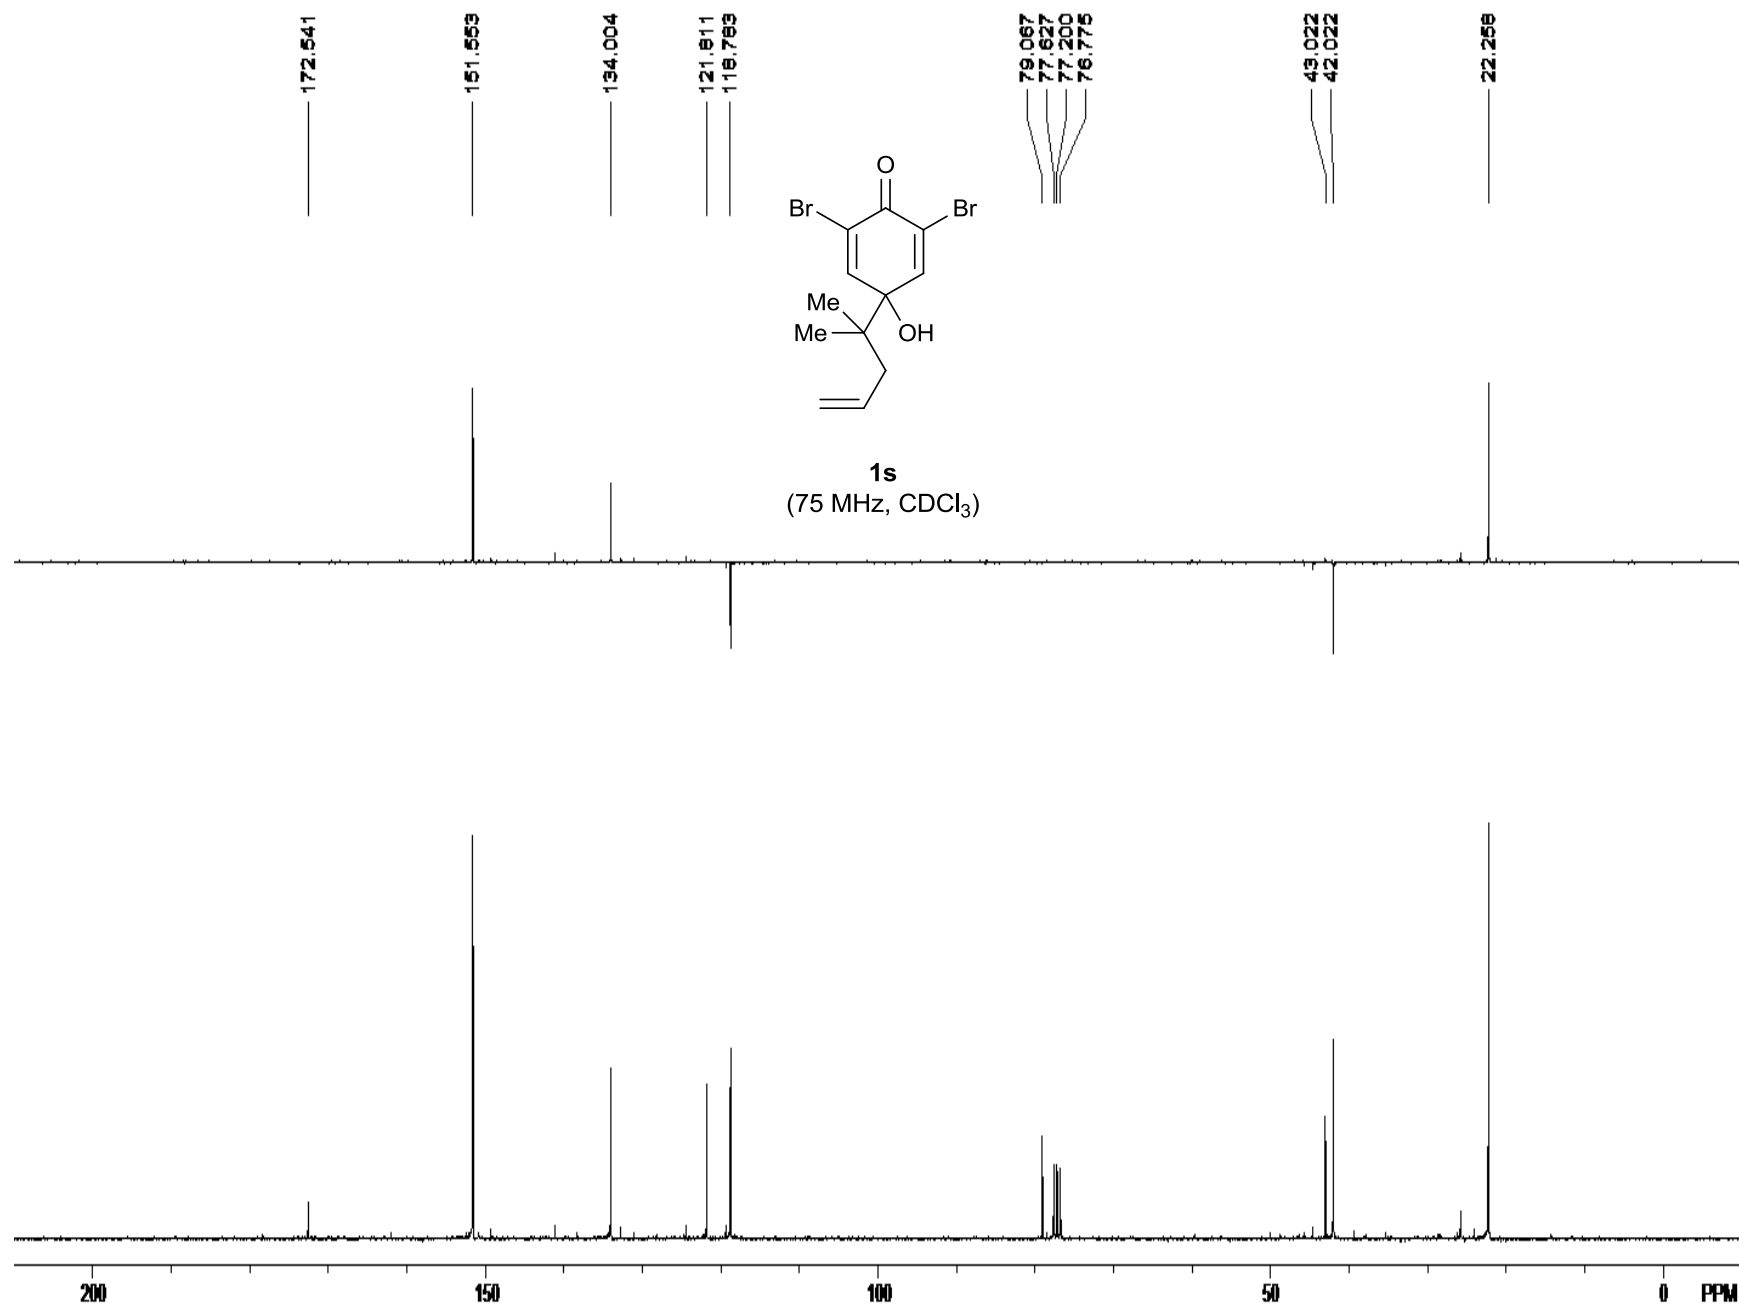

0.000

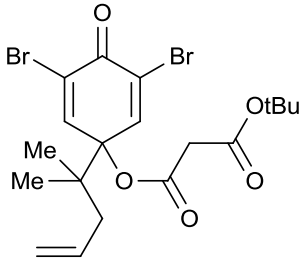

**4s**  
(300 MHz, CDCl<sub>3</sub>)

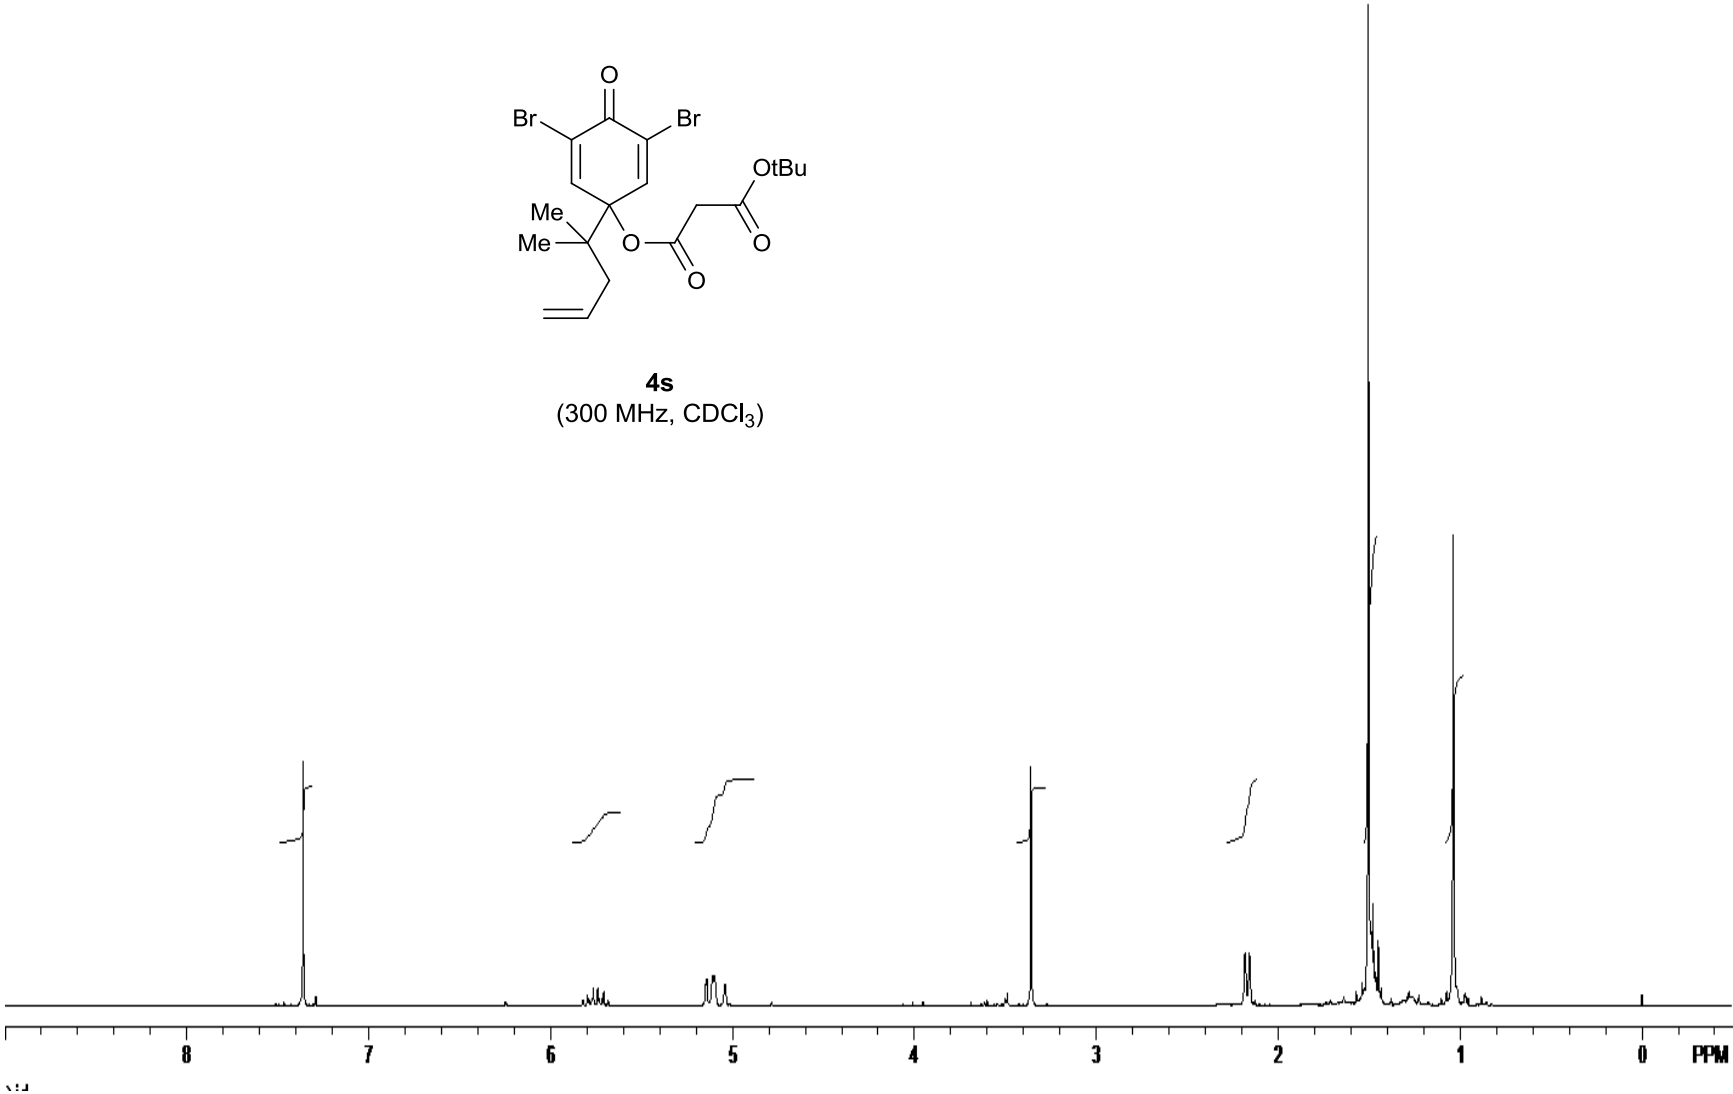



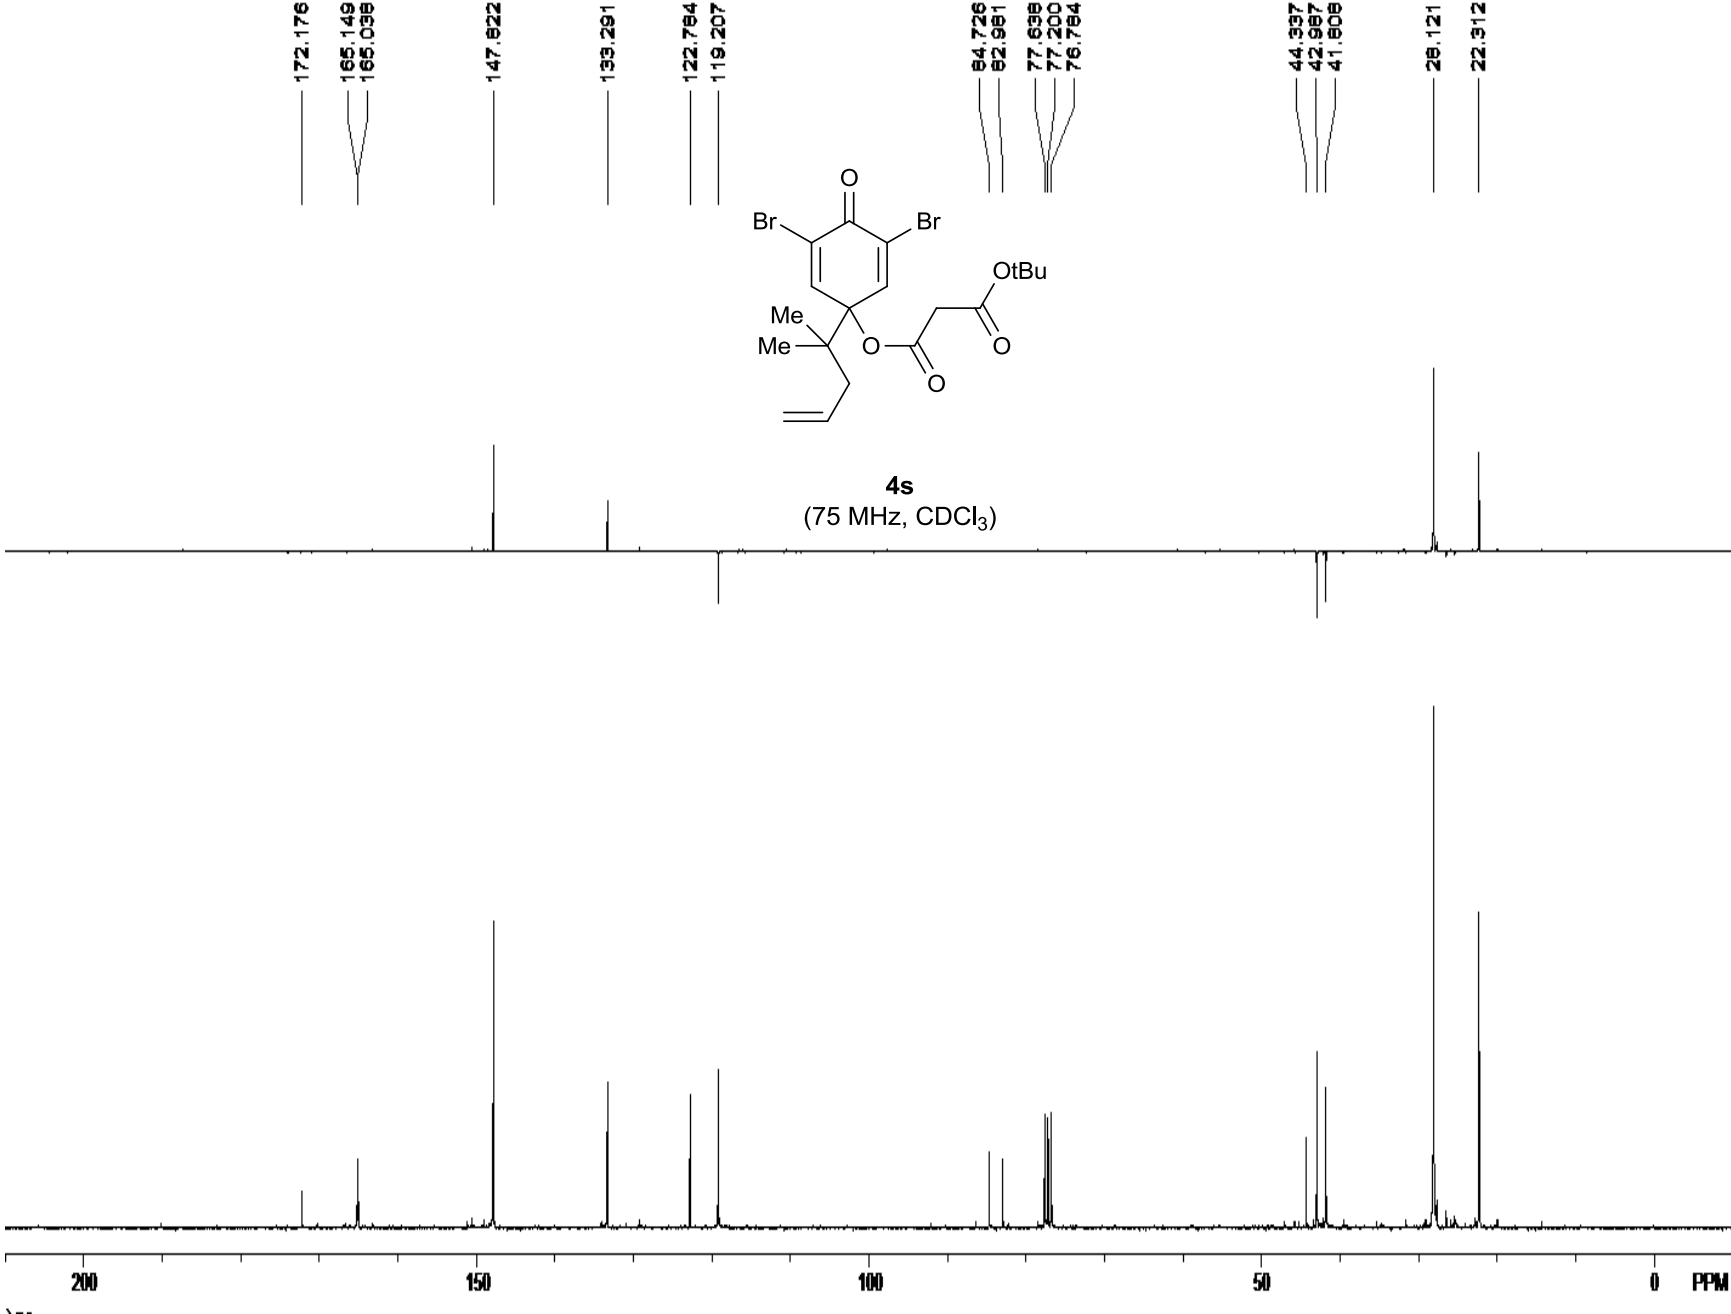

300.17 MHz  
cdcl3

7.26

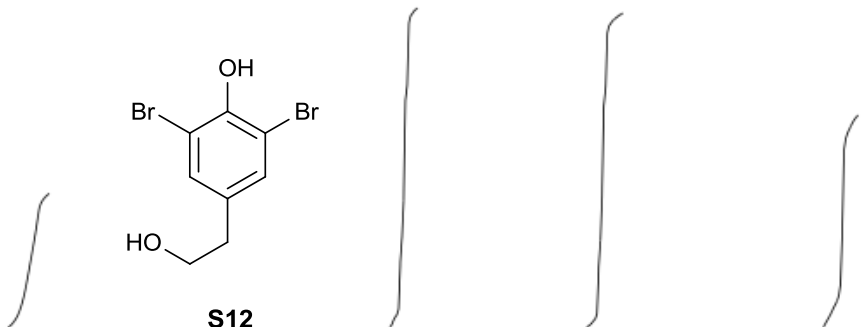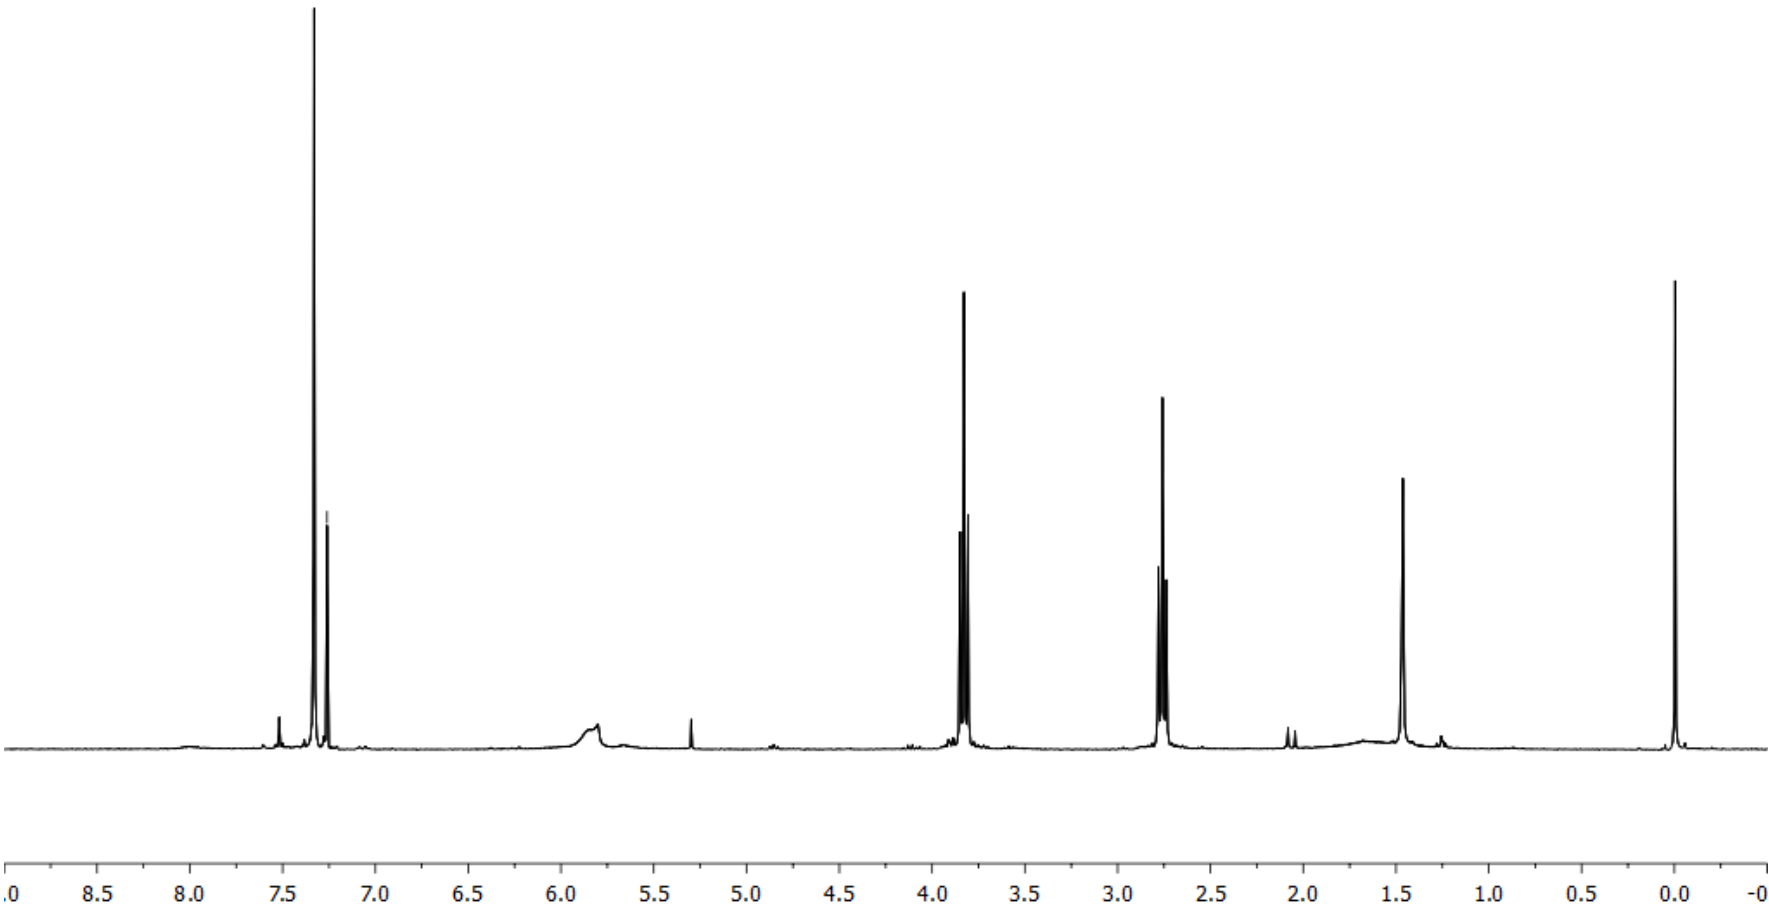

75.43 MHz  
CDCl<sub>3</sub>

148.11  
133.50  
132.57  
109.92  
77.58  
77.16  
76.73  
63.38  
37.70

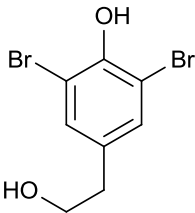

**S12**  
(75 MHz, CDCl<sub>3</sub>)

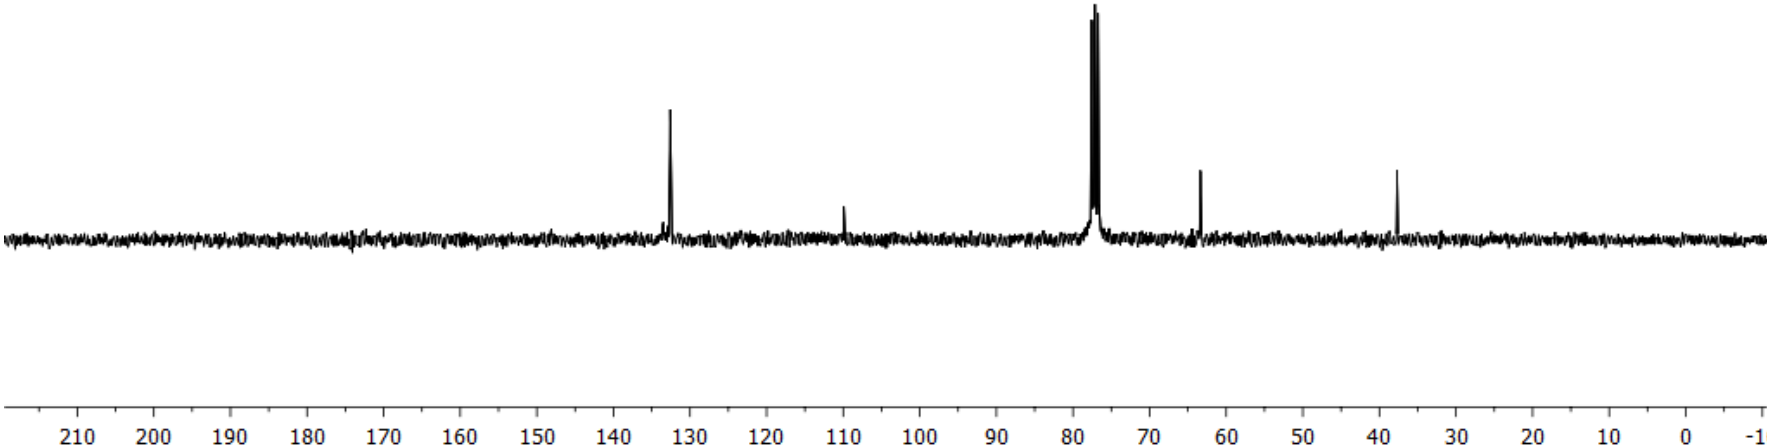

300.17 MHz  
cdcl3

7.26

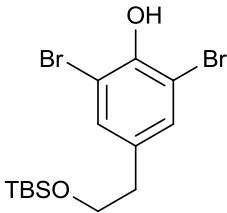

**S13**  
(300 MHz, CDCl<sub>3</sub>)

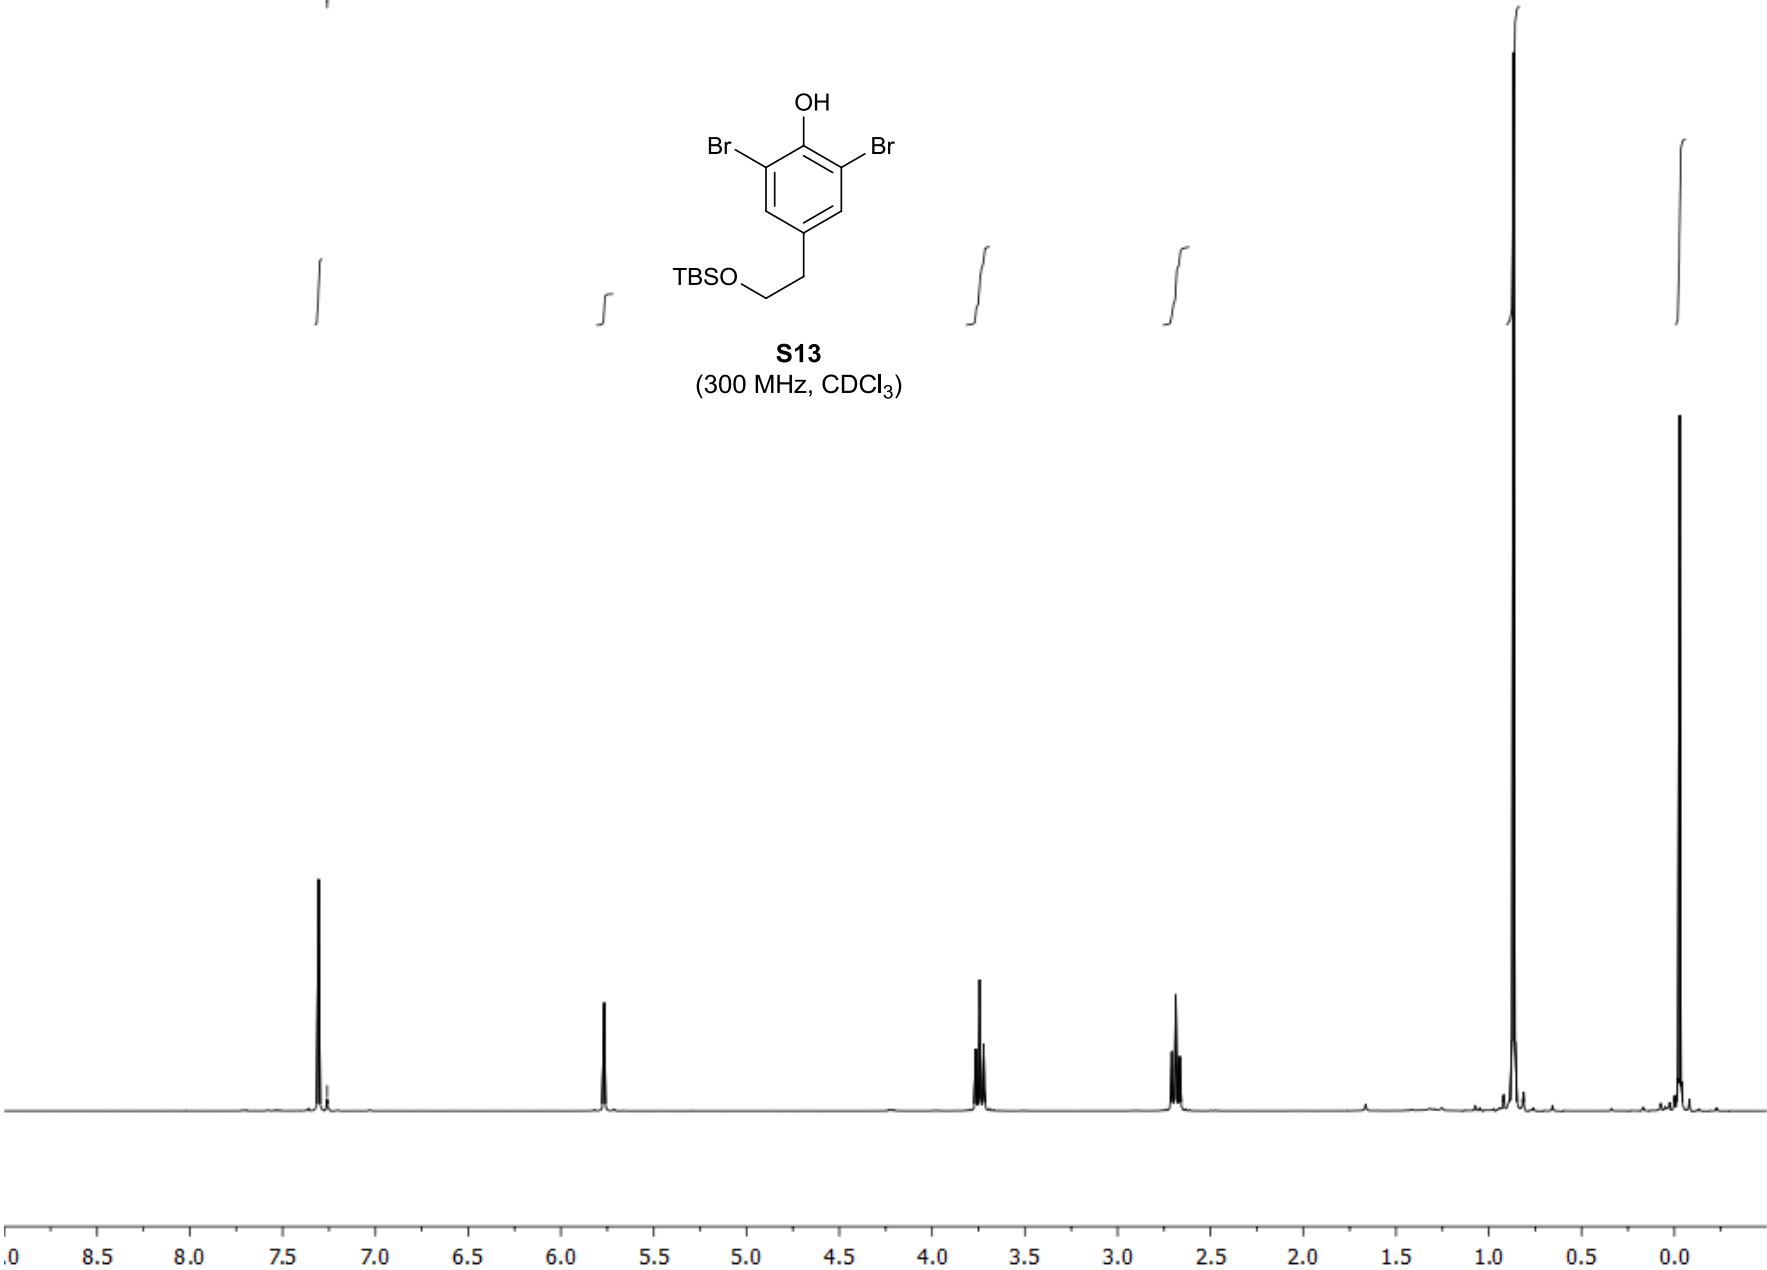

75.43 MHz  
CDCl<sub>3</sub>

147.73  
134.37  
132.77  
109.45  
77.58  
77.16  
76.74  
63.90  
37.97  
26.00  
18.39  
-5.32

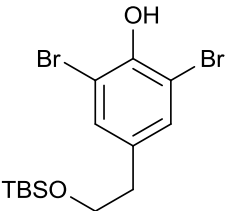

**S13**  
(75 MHz, CDCl<sub>3</sub>)

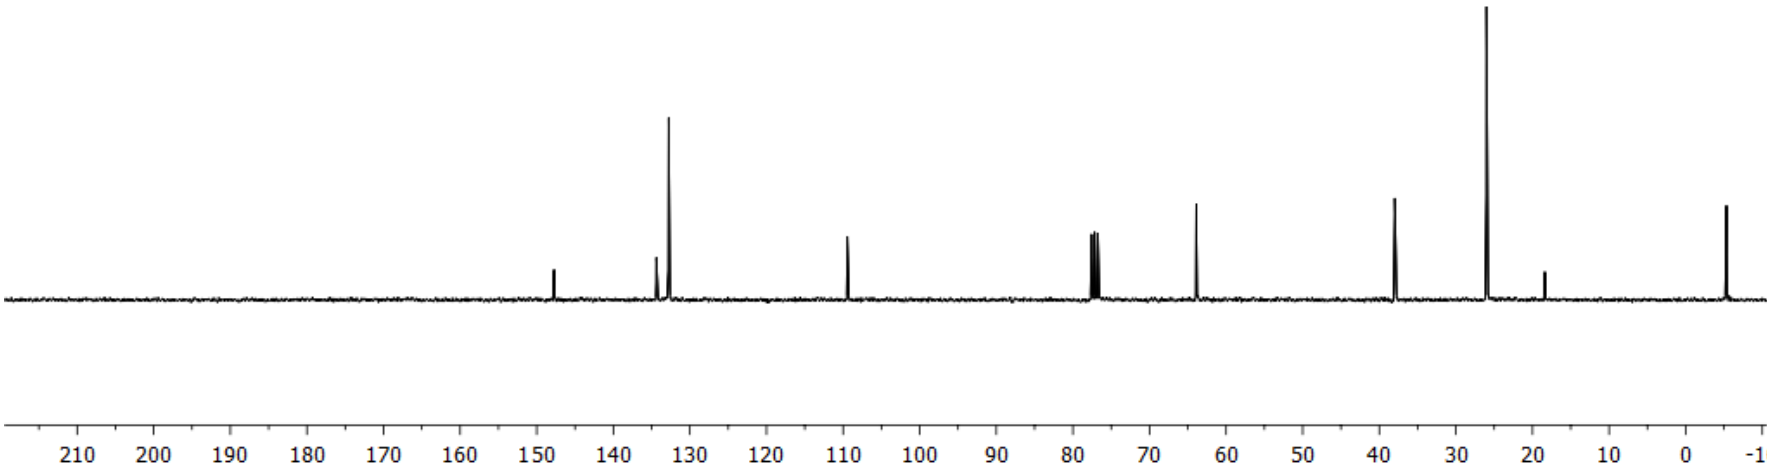

—7.26

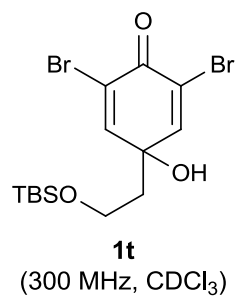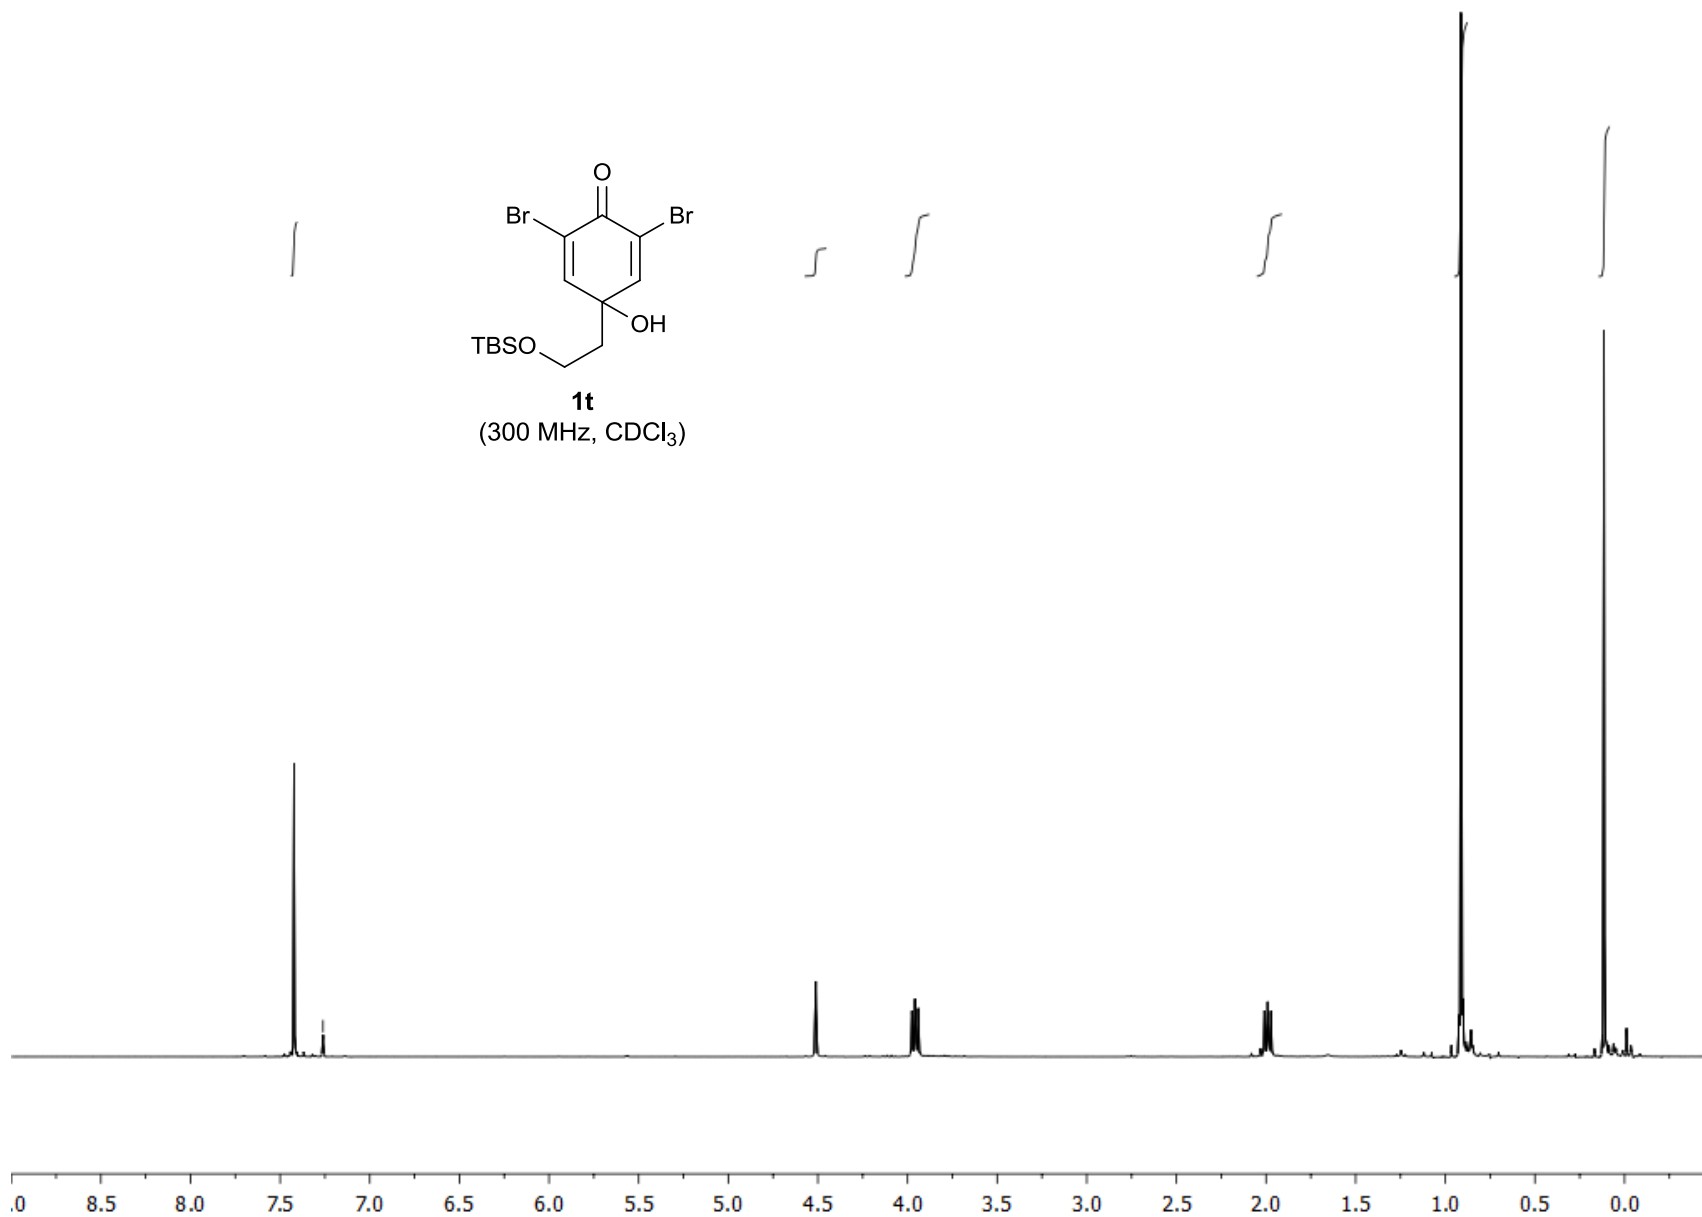

75.43 MHz  
CDCl<sub>3</sub>

172.40

151.72

121.04

77.58  
77.16  
76.74  
74.31

60.37

41.03

25.91

18.15

-5.45

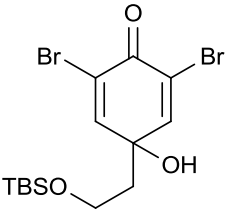

**1t**  
(75 MHz, CDCl<sub>3</sub>)

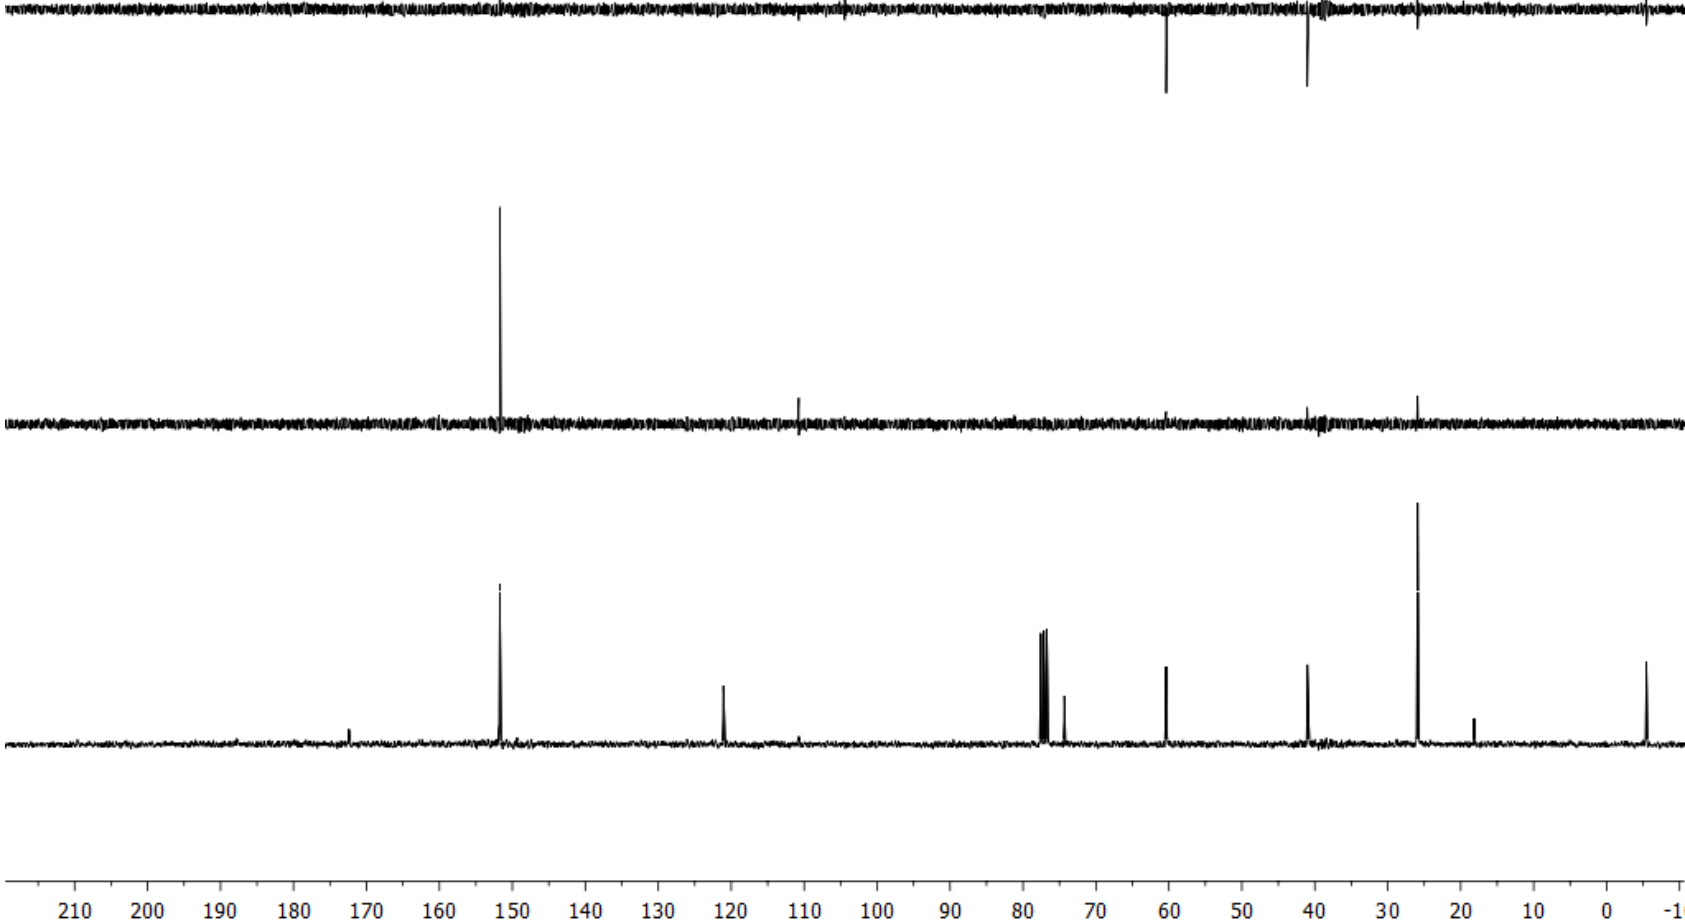

299.96 MHz  
CDCl<sub>3</sub>

7.26

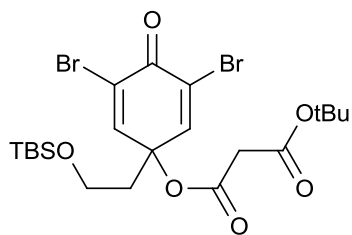

**4t**  
(300 MHz, CDCl<sub>3</sub>)

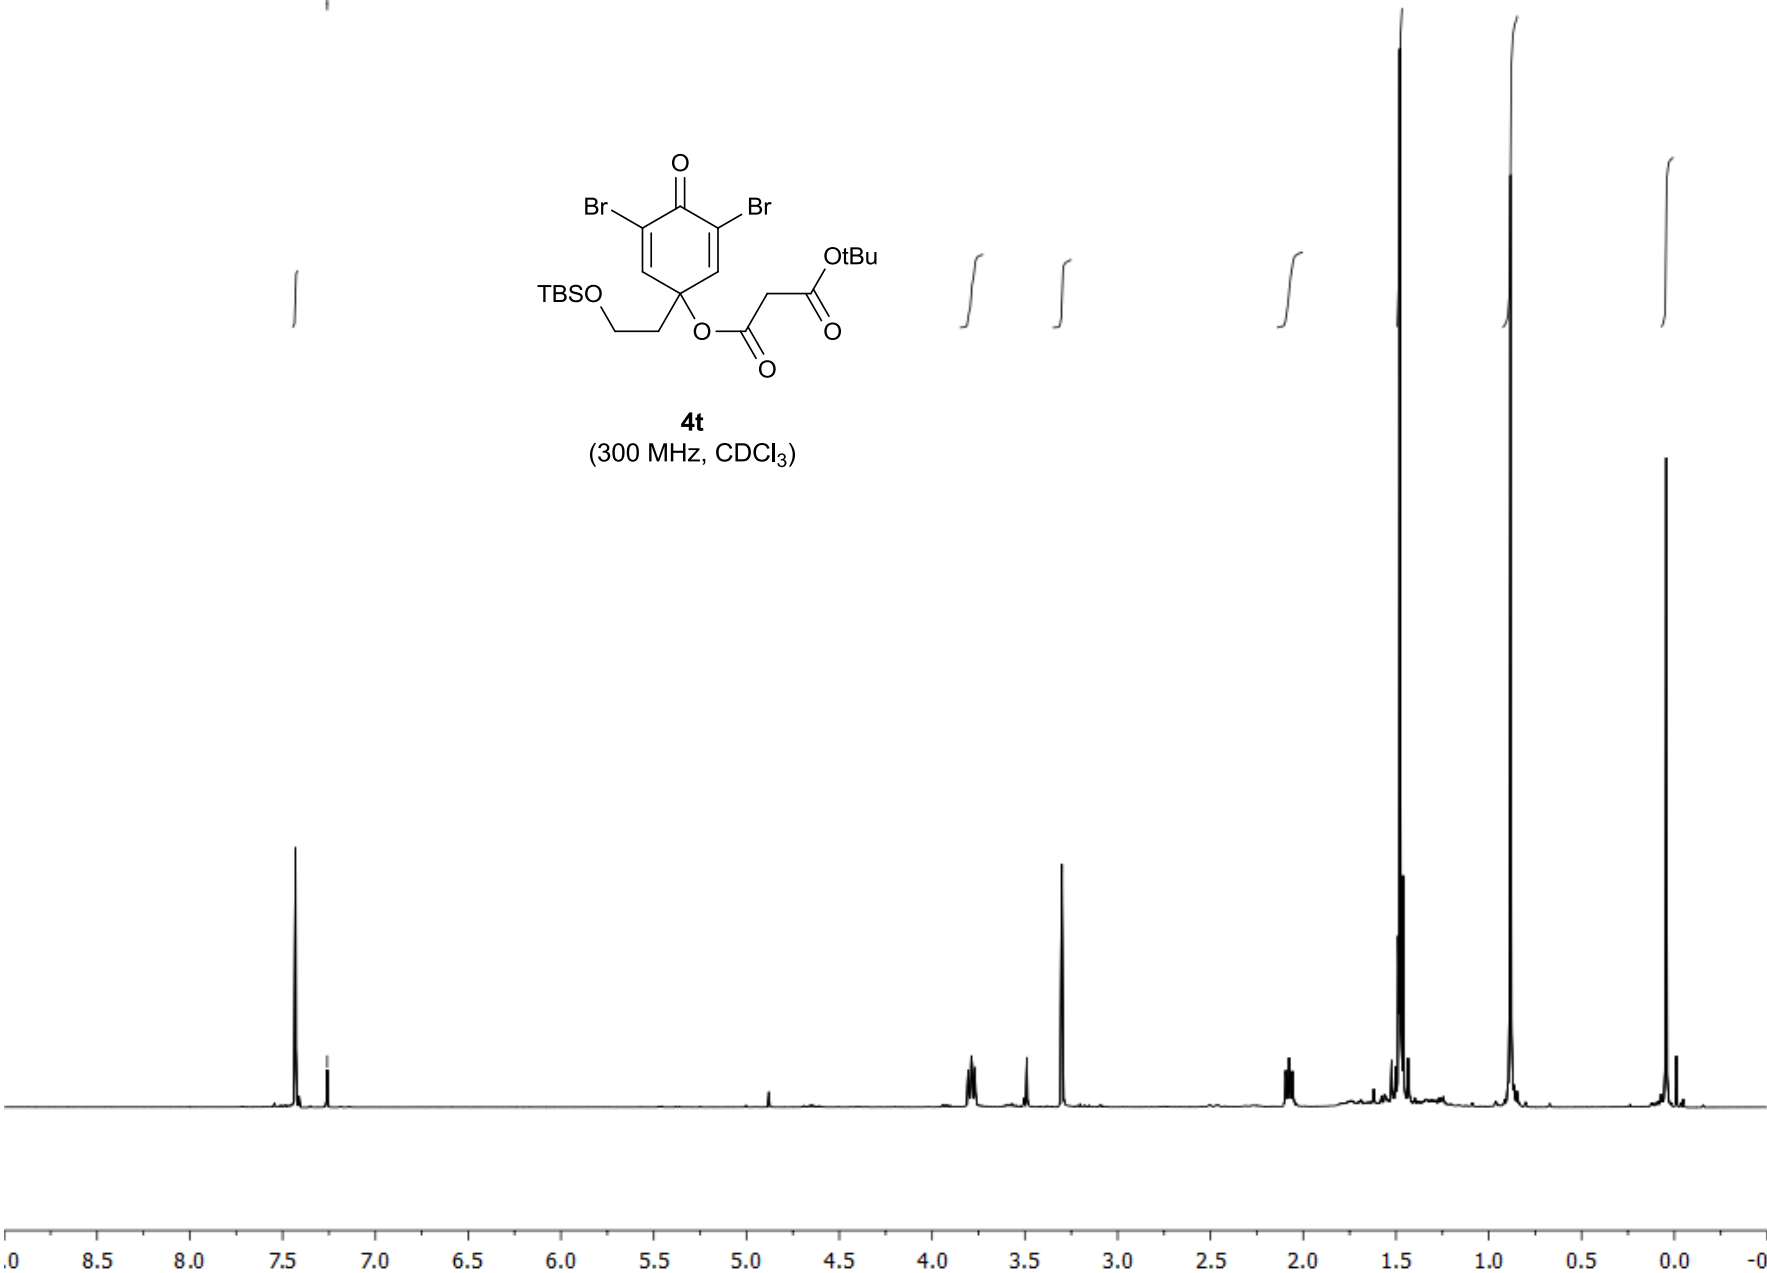



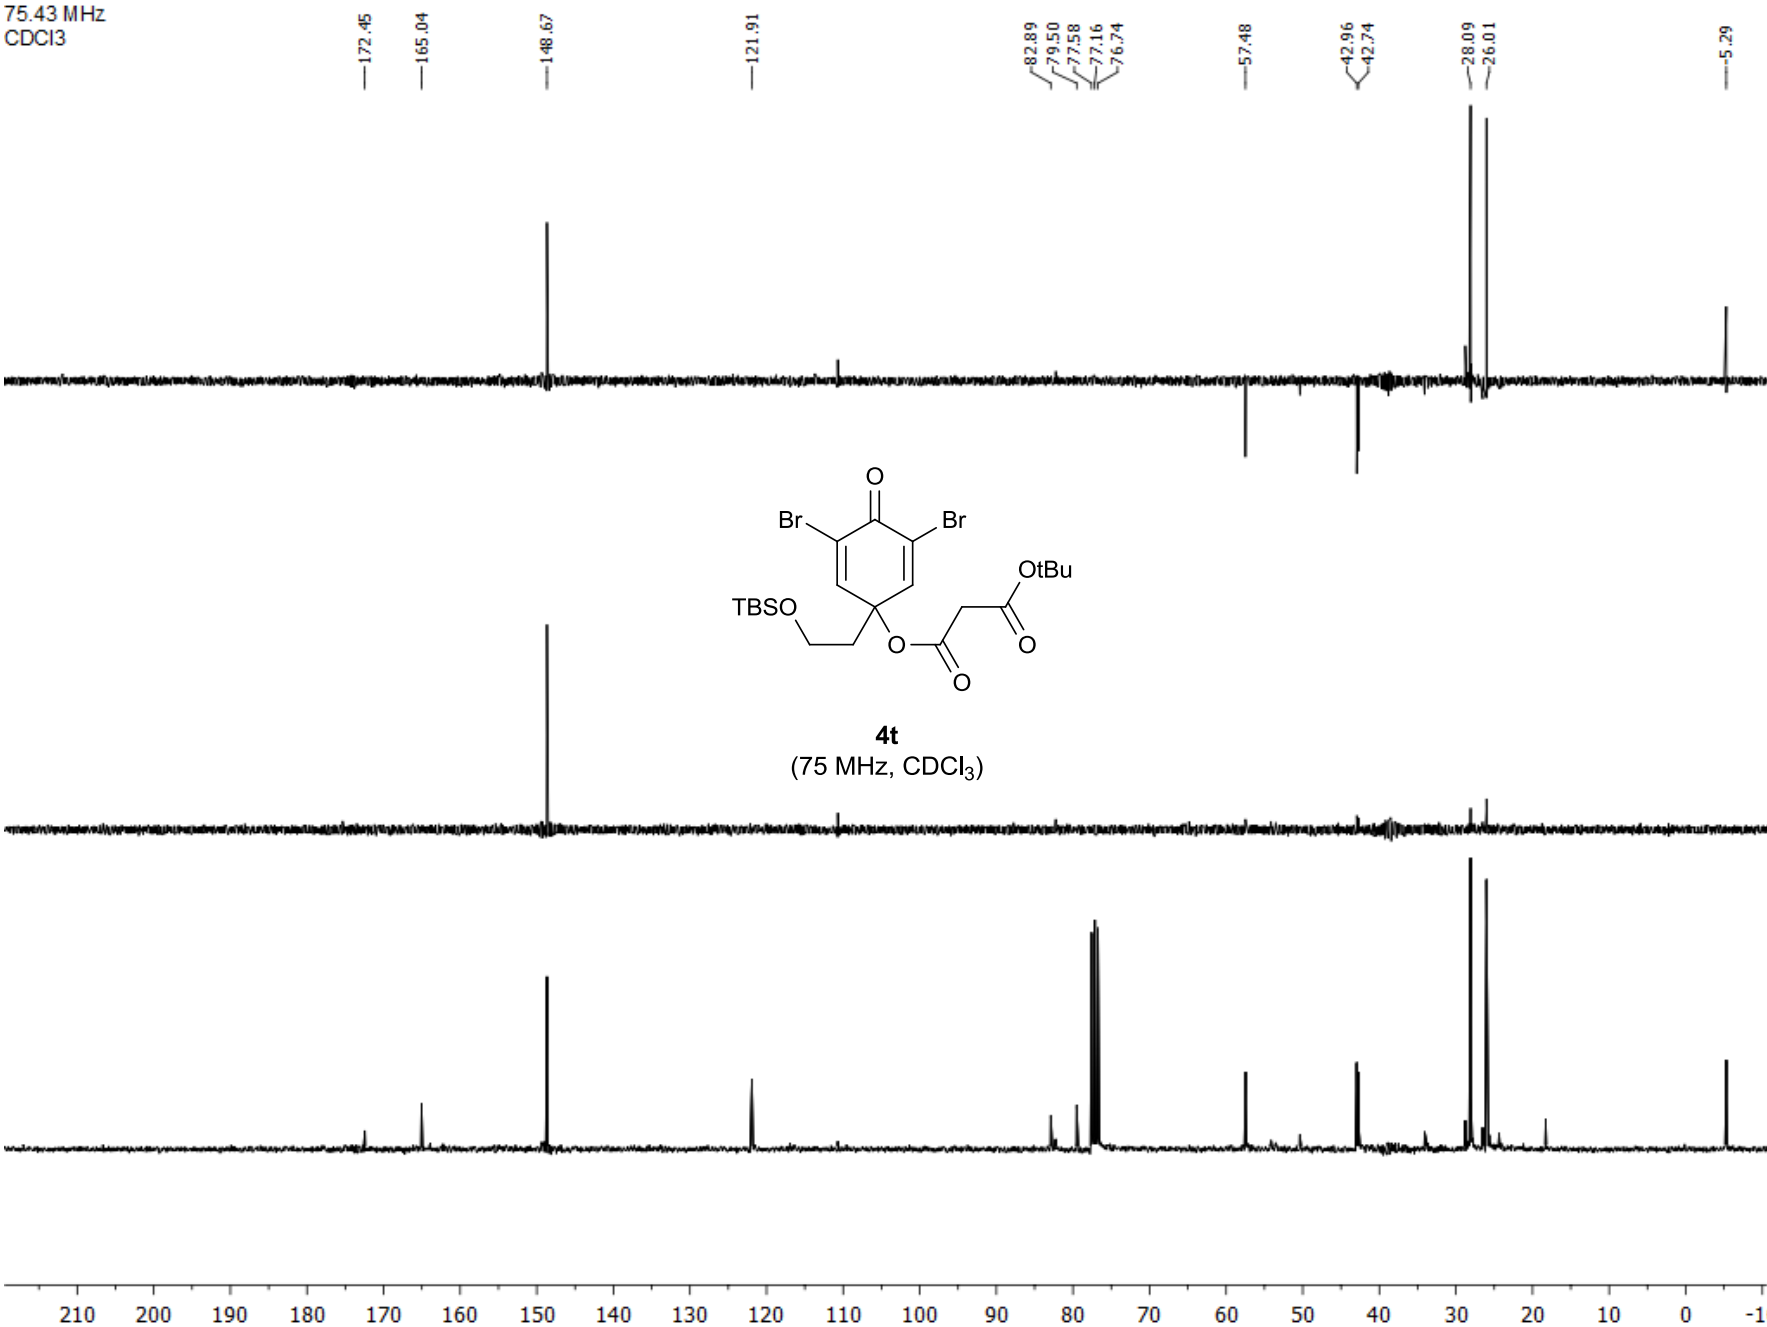

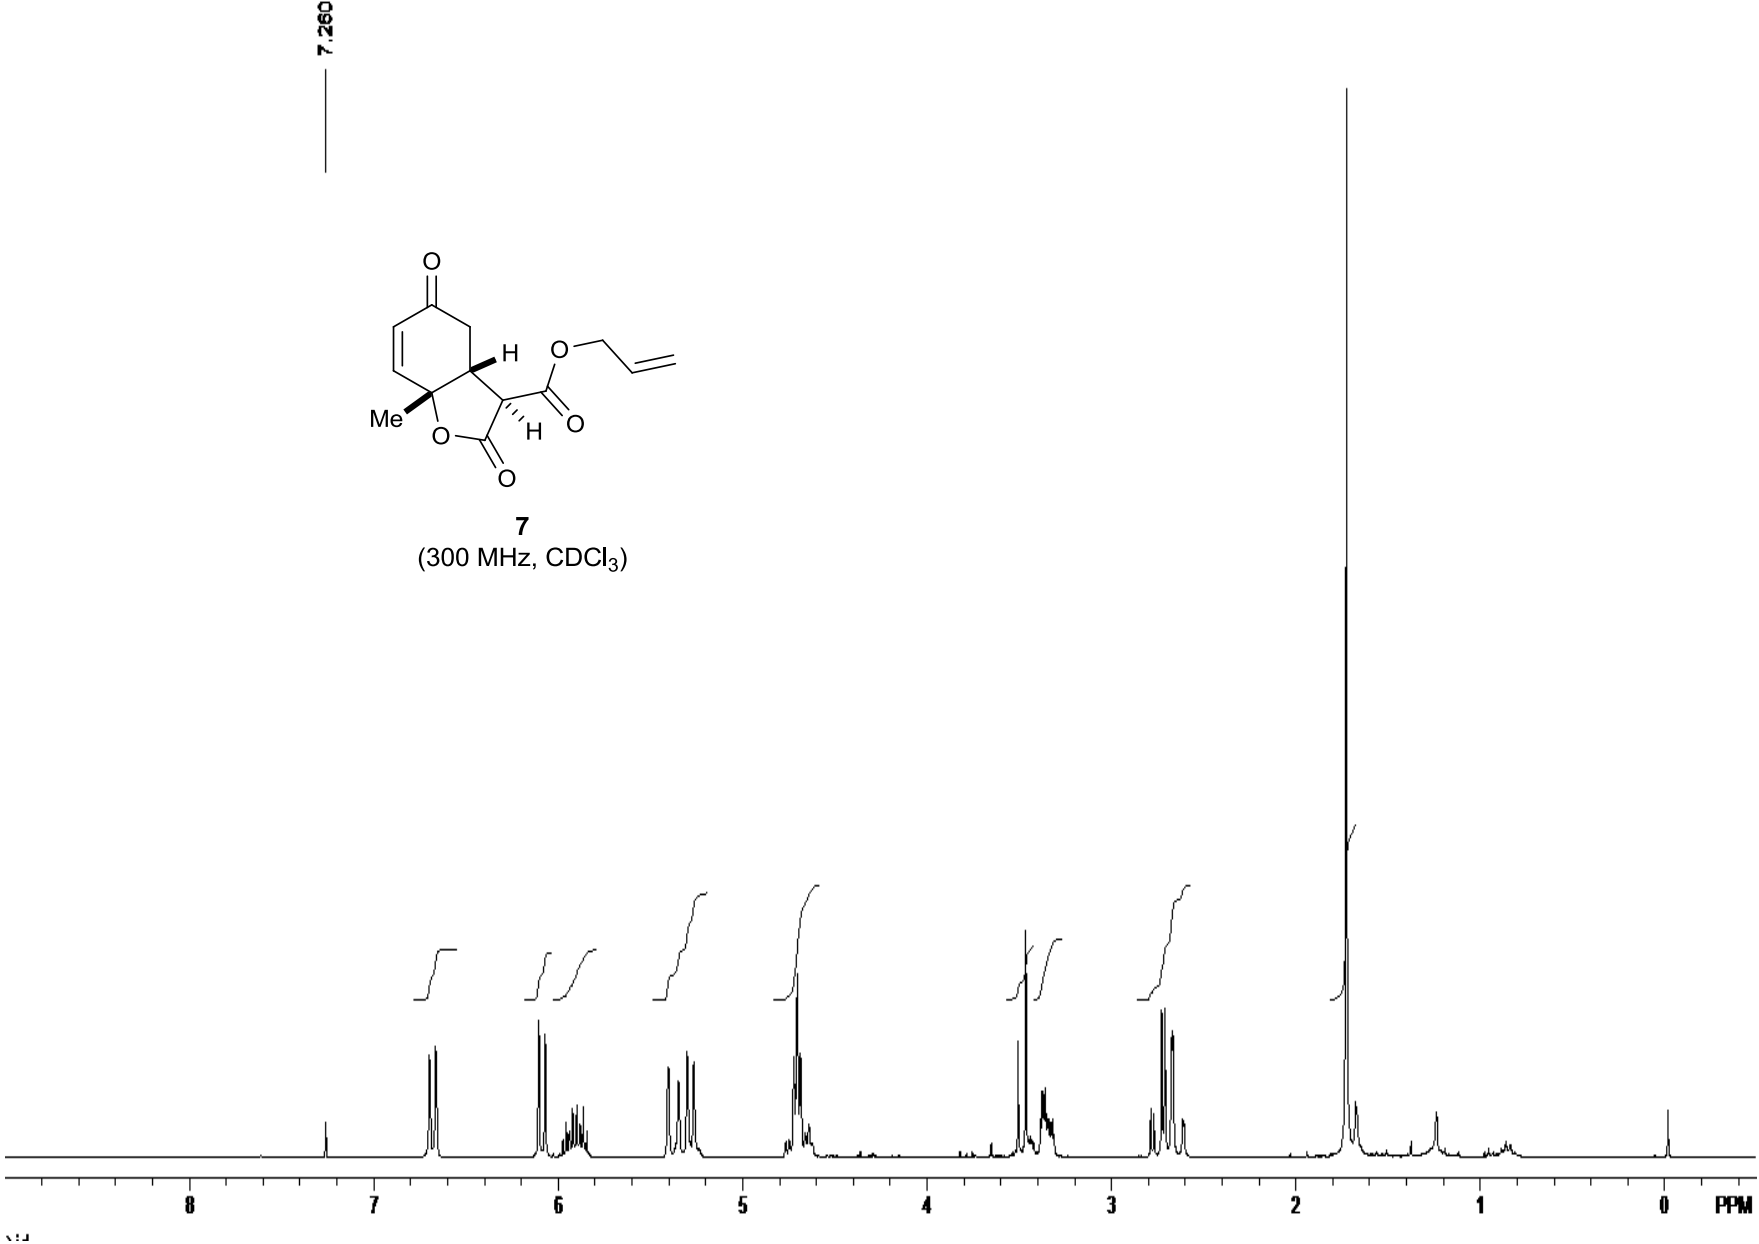

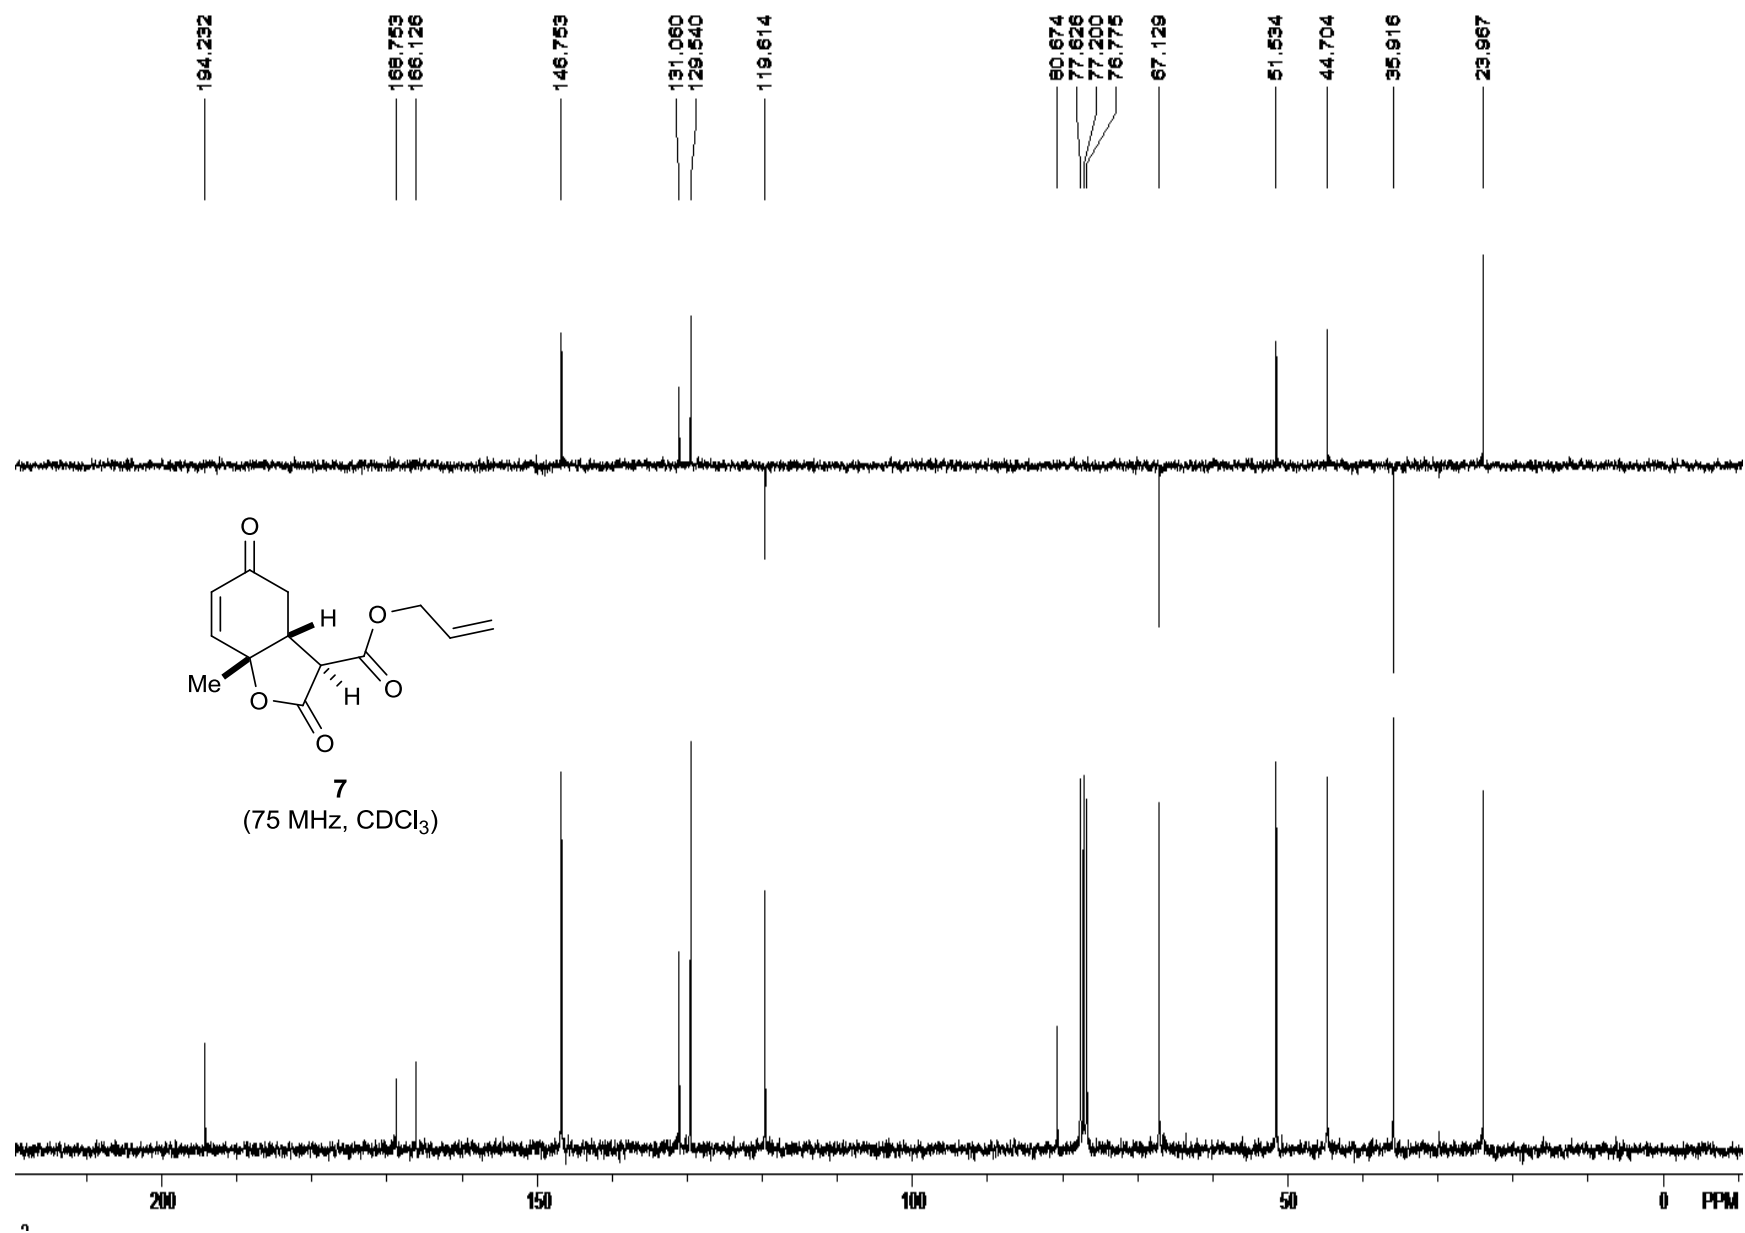

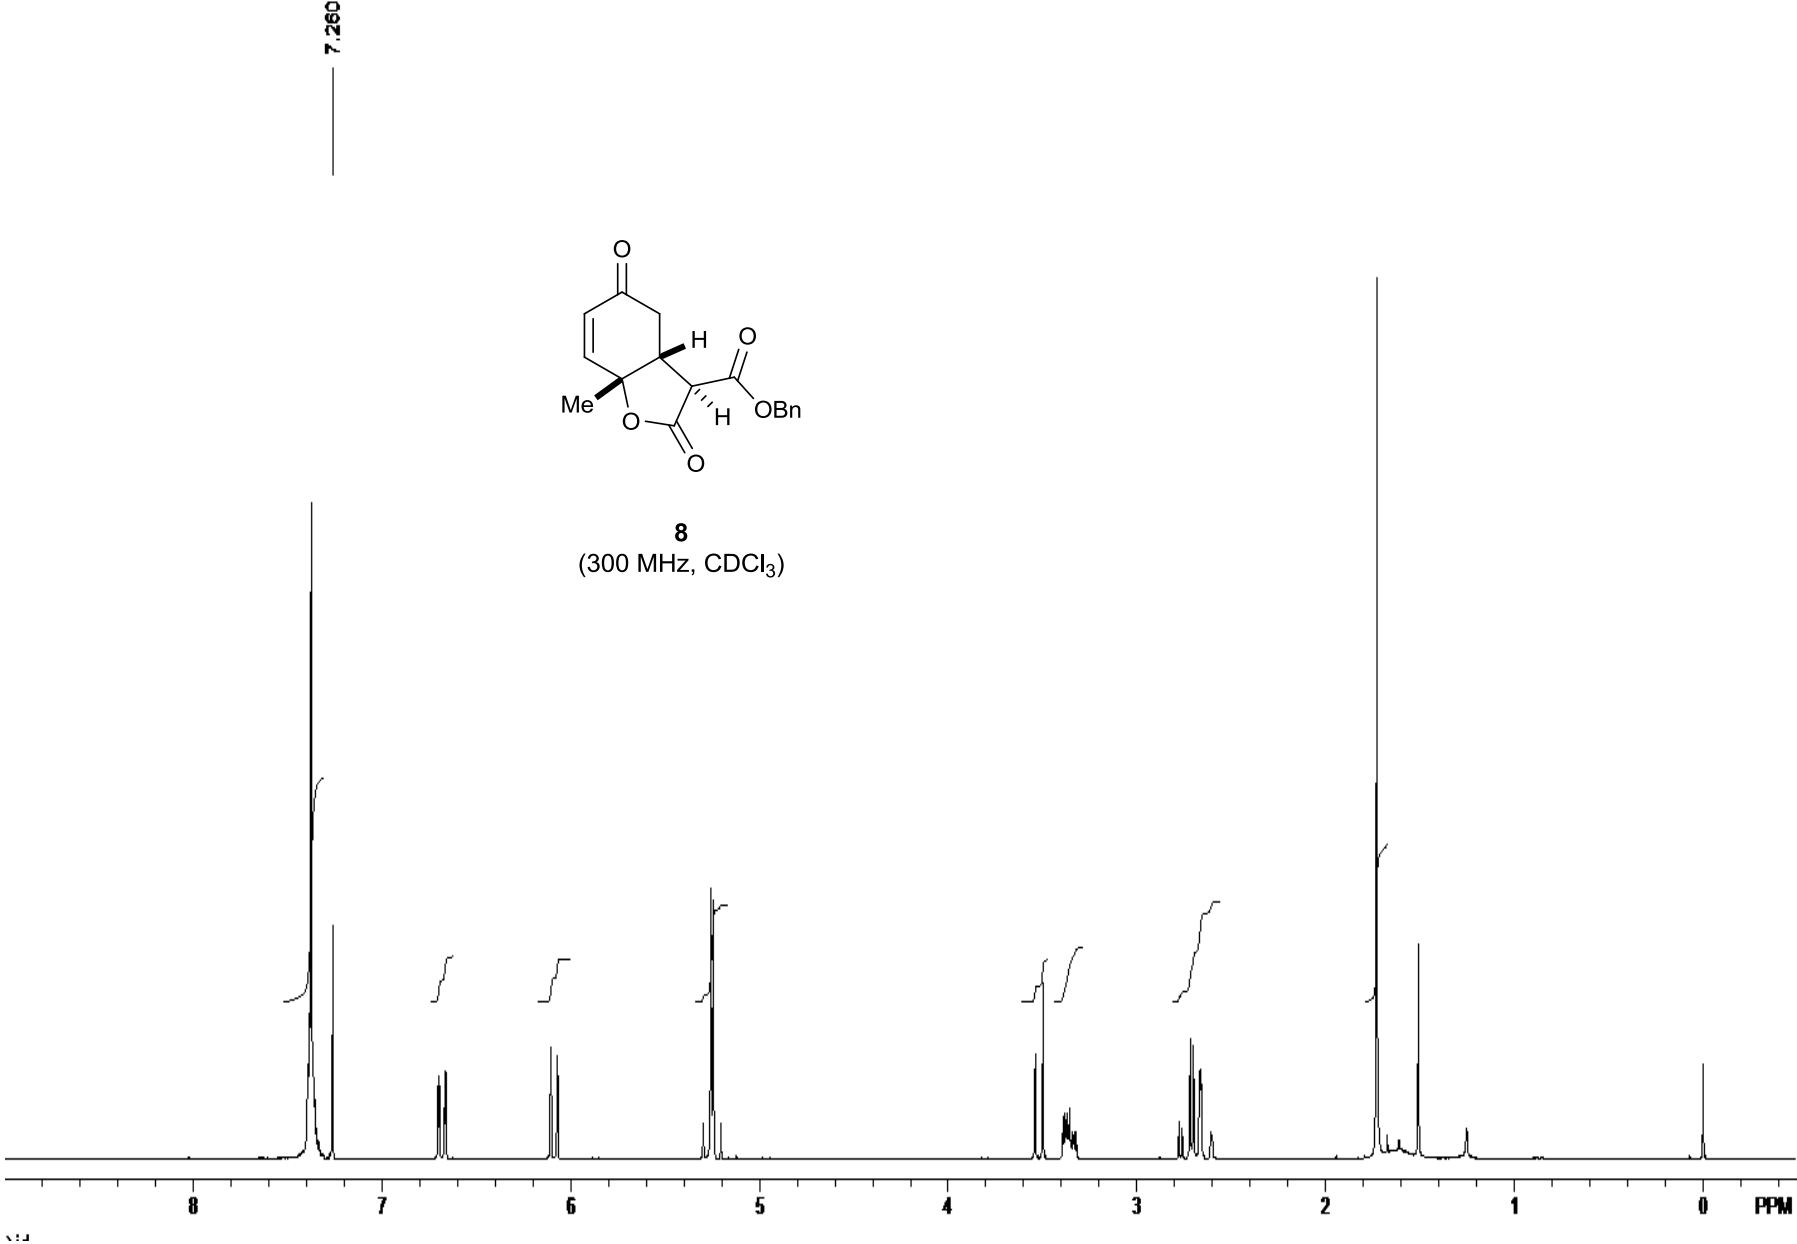

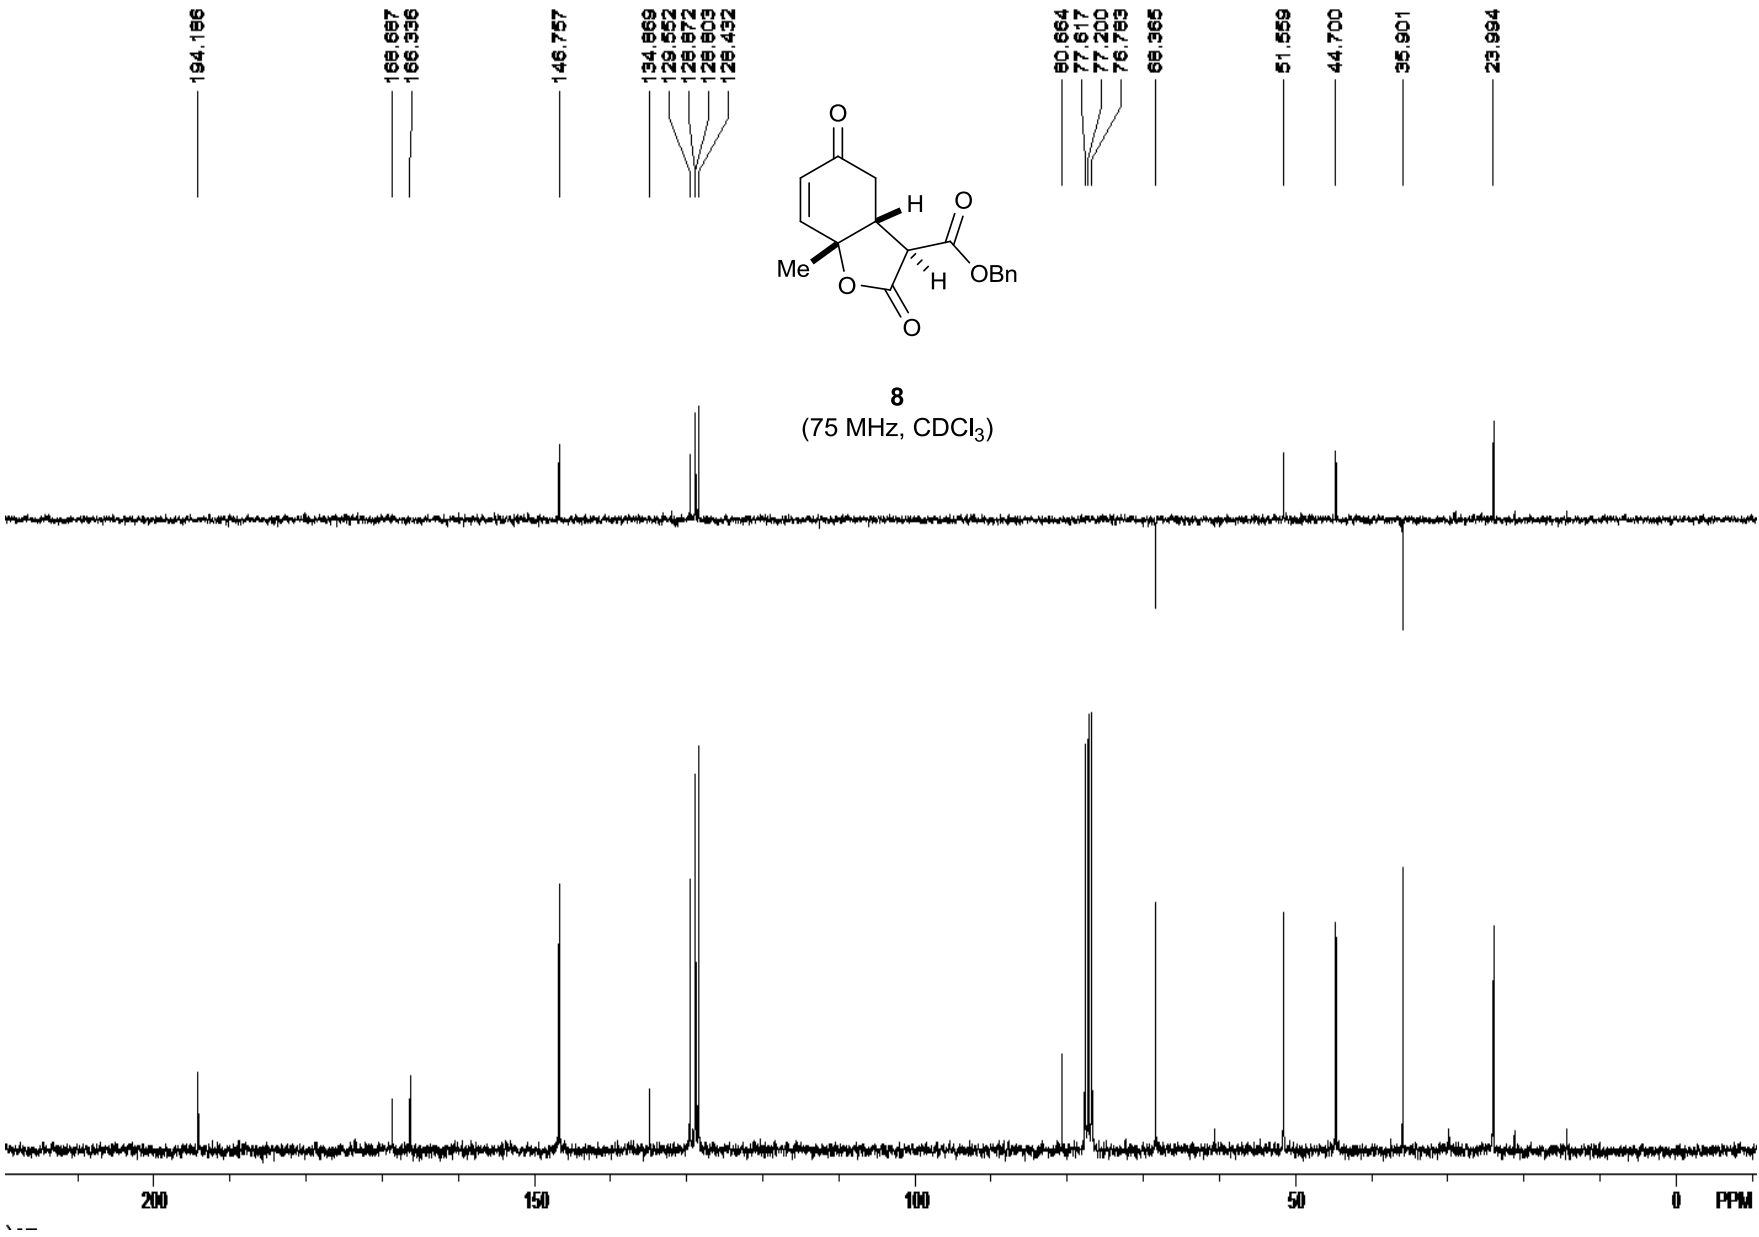

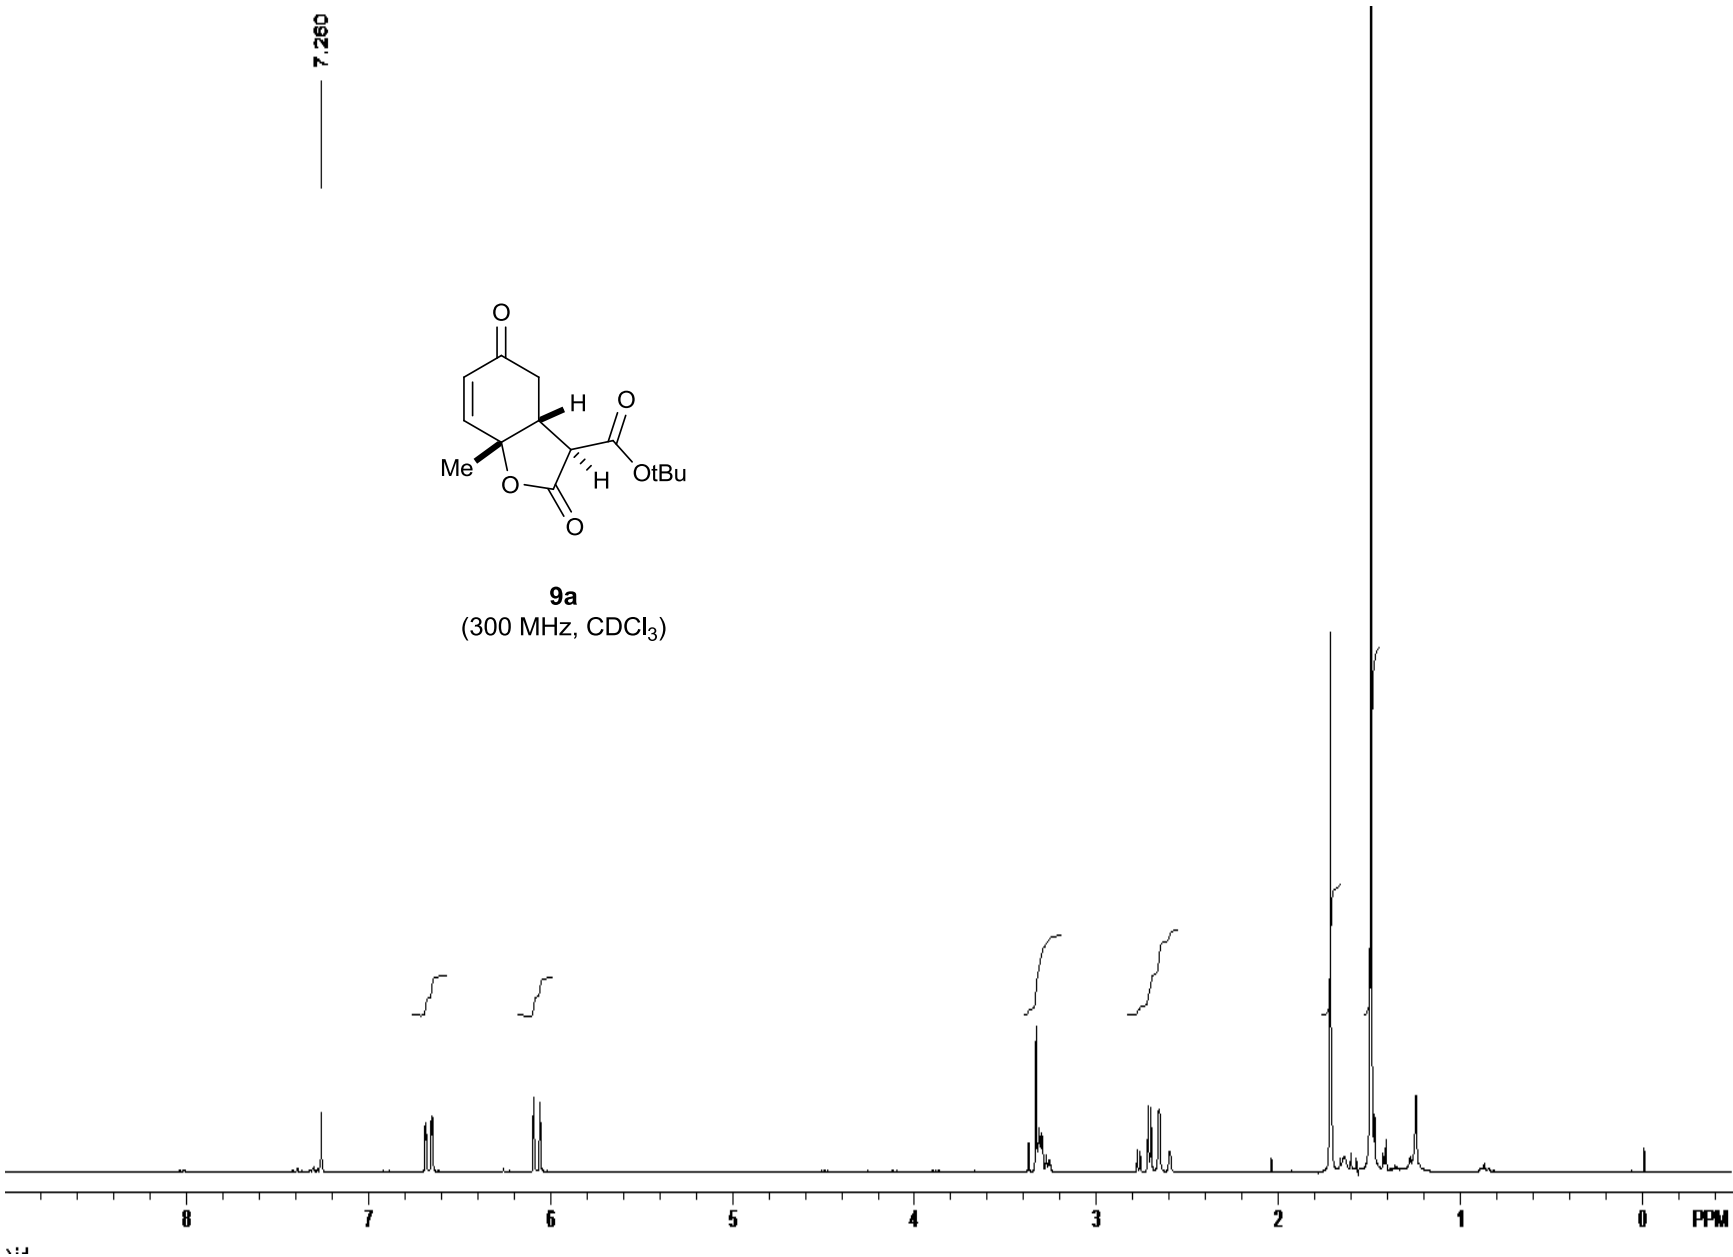

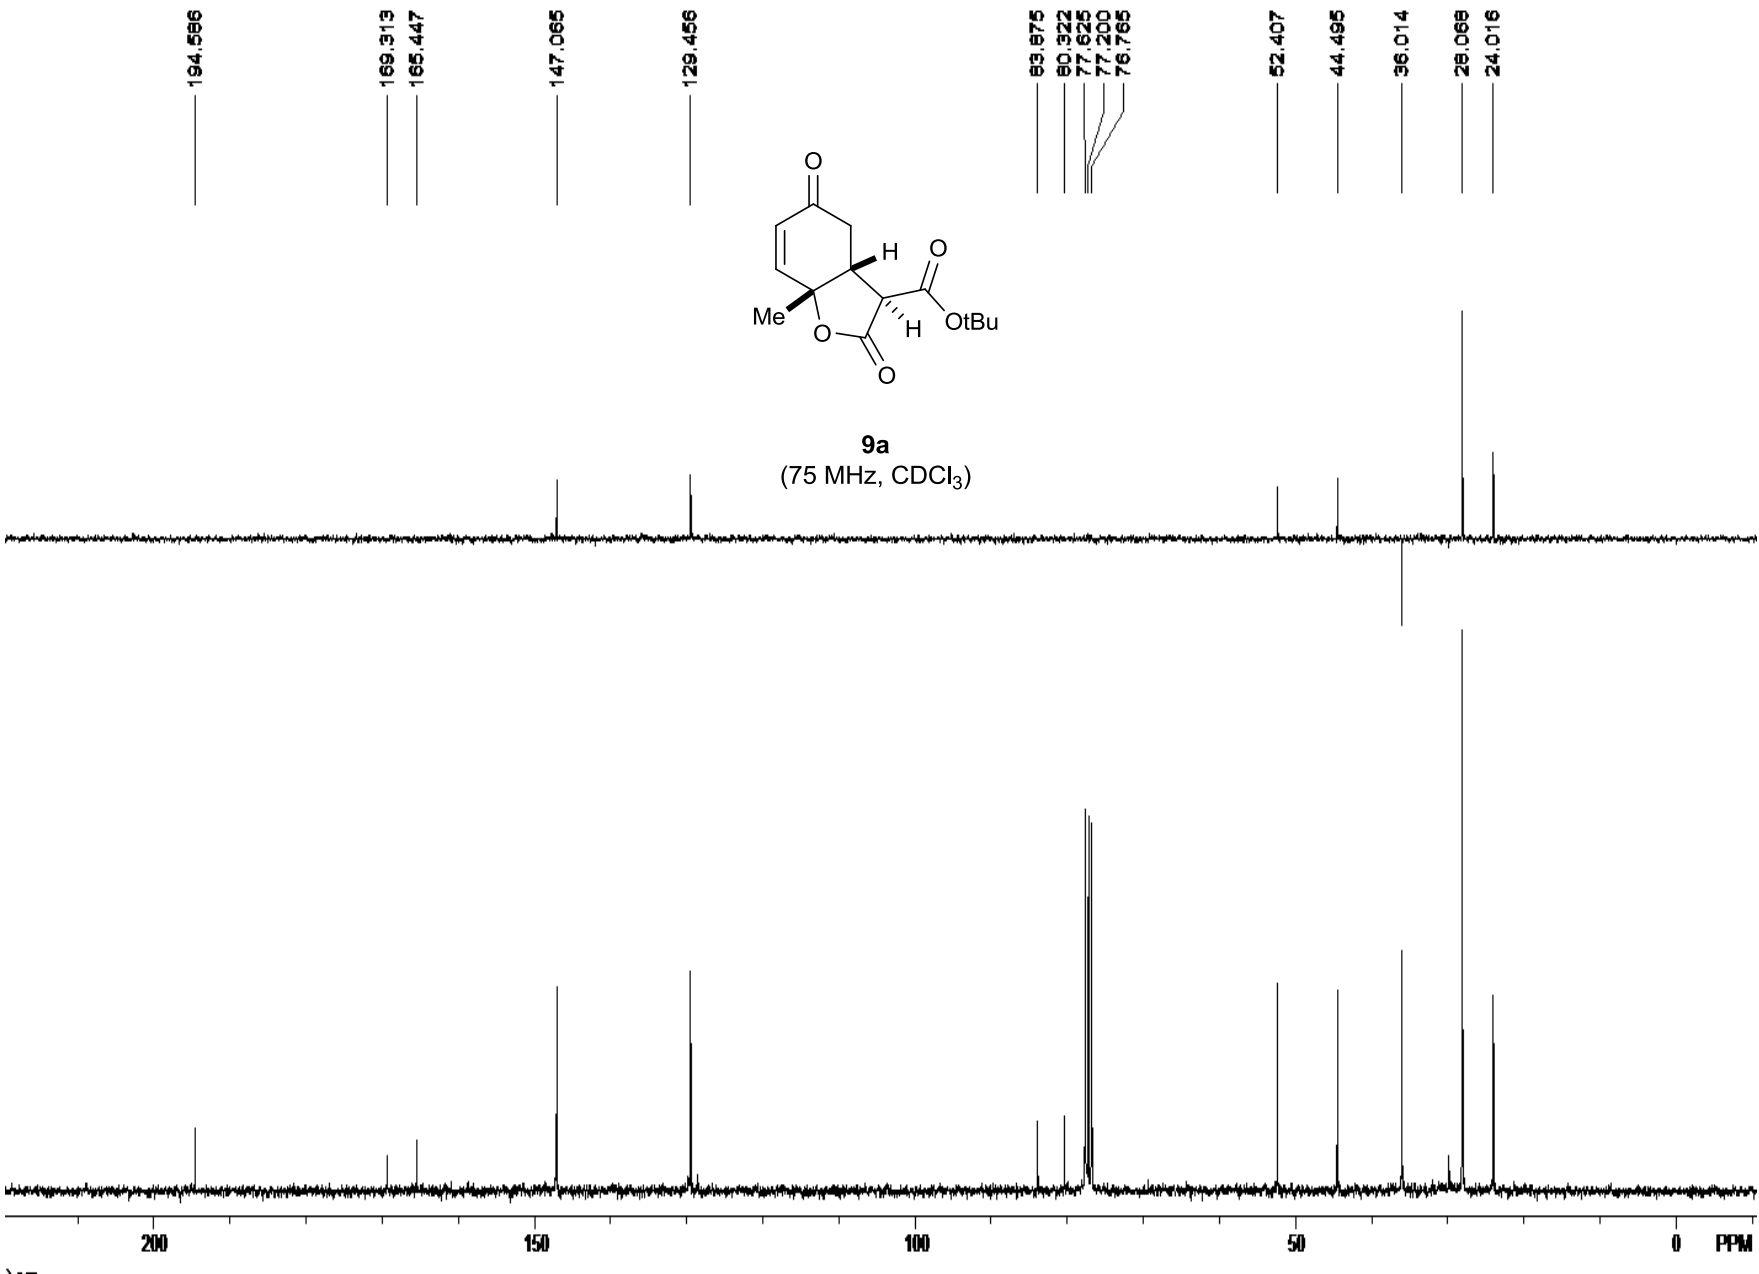

7.260

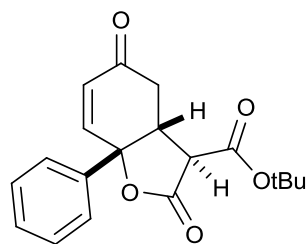

**9b**  
(300 MHz, CDCl<sub>3</sub>)

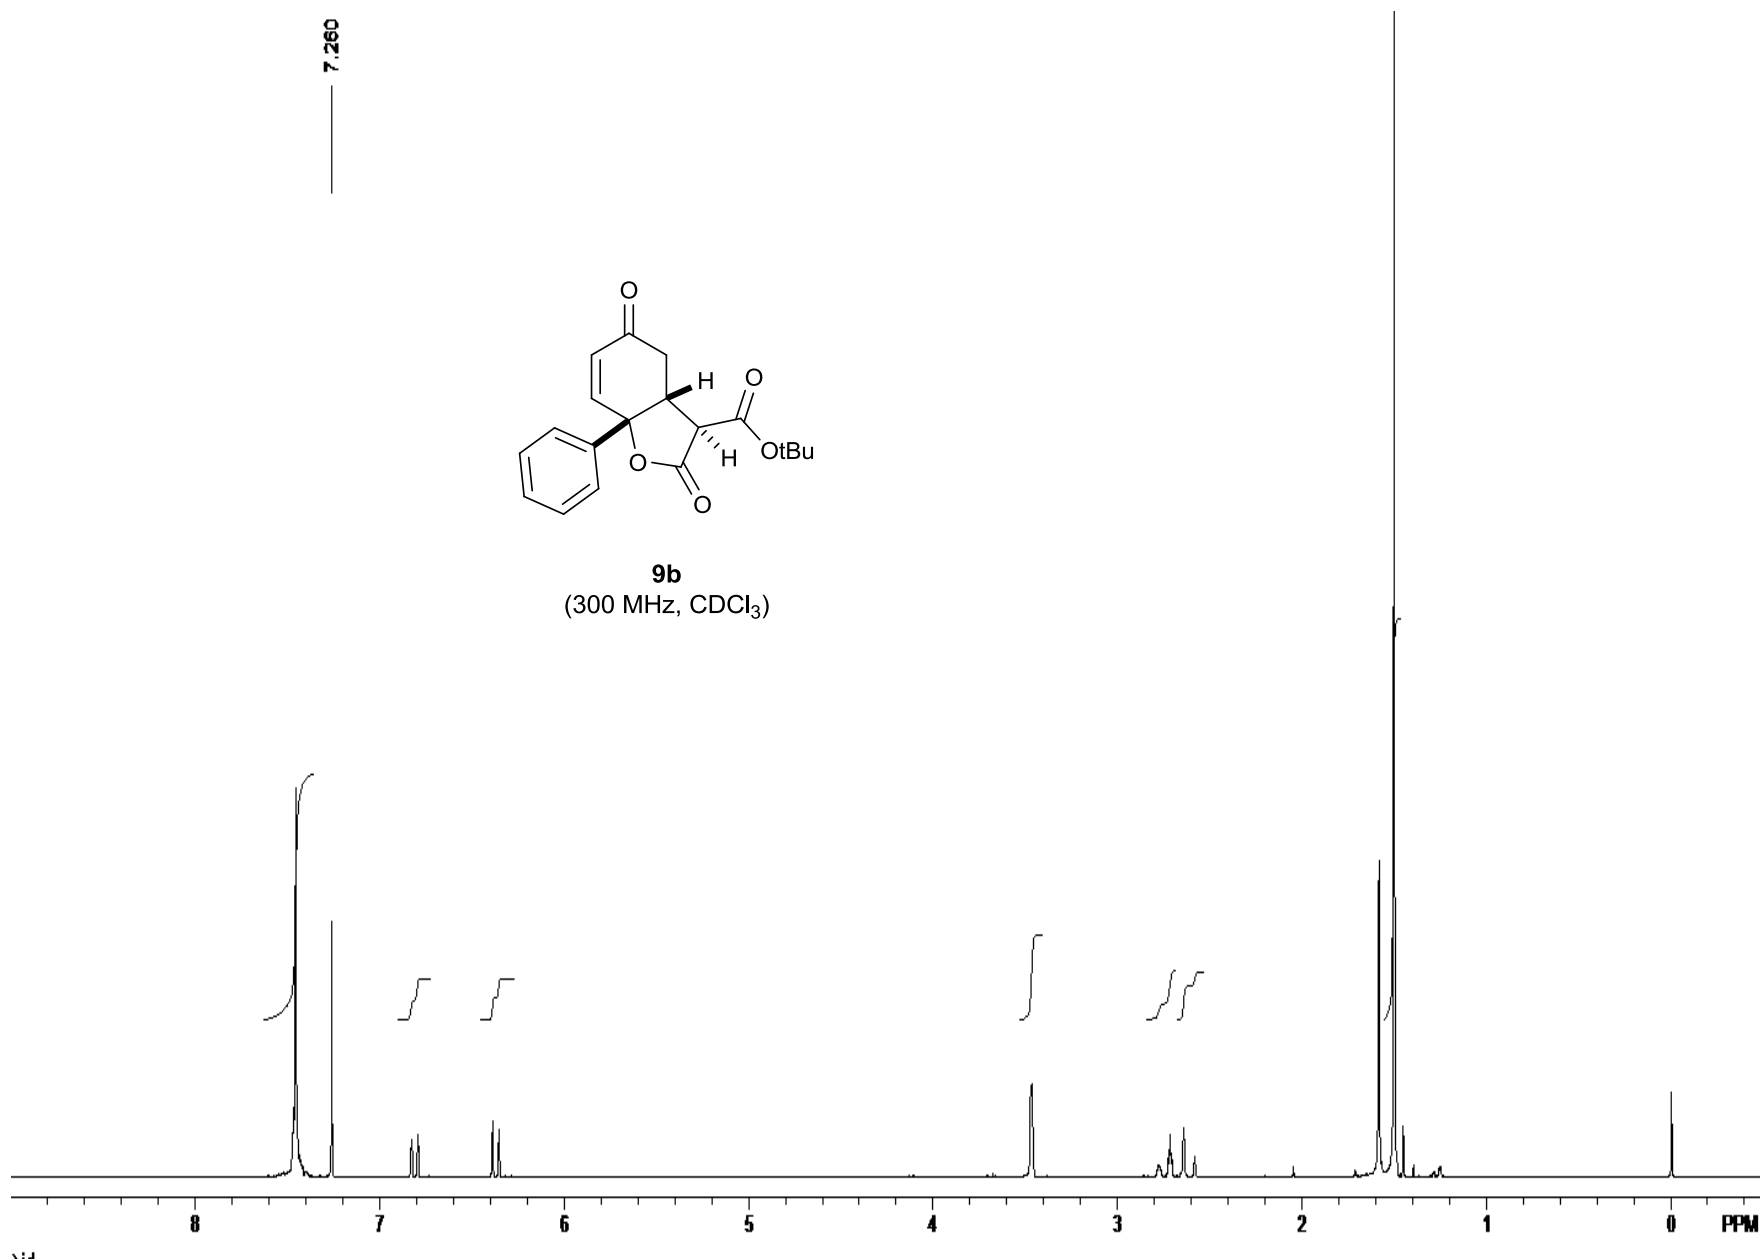



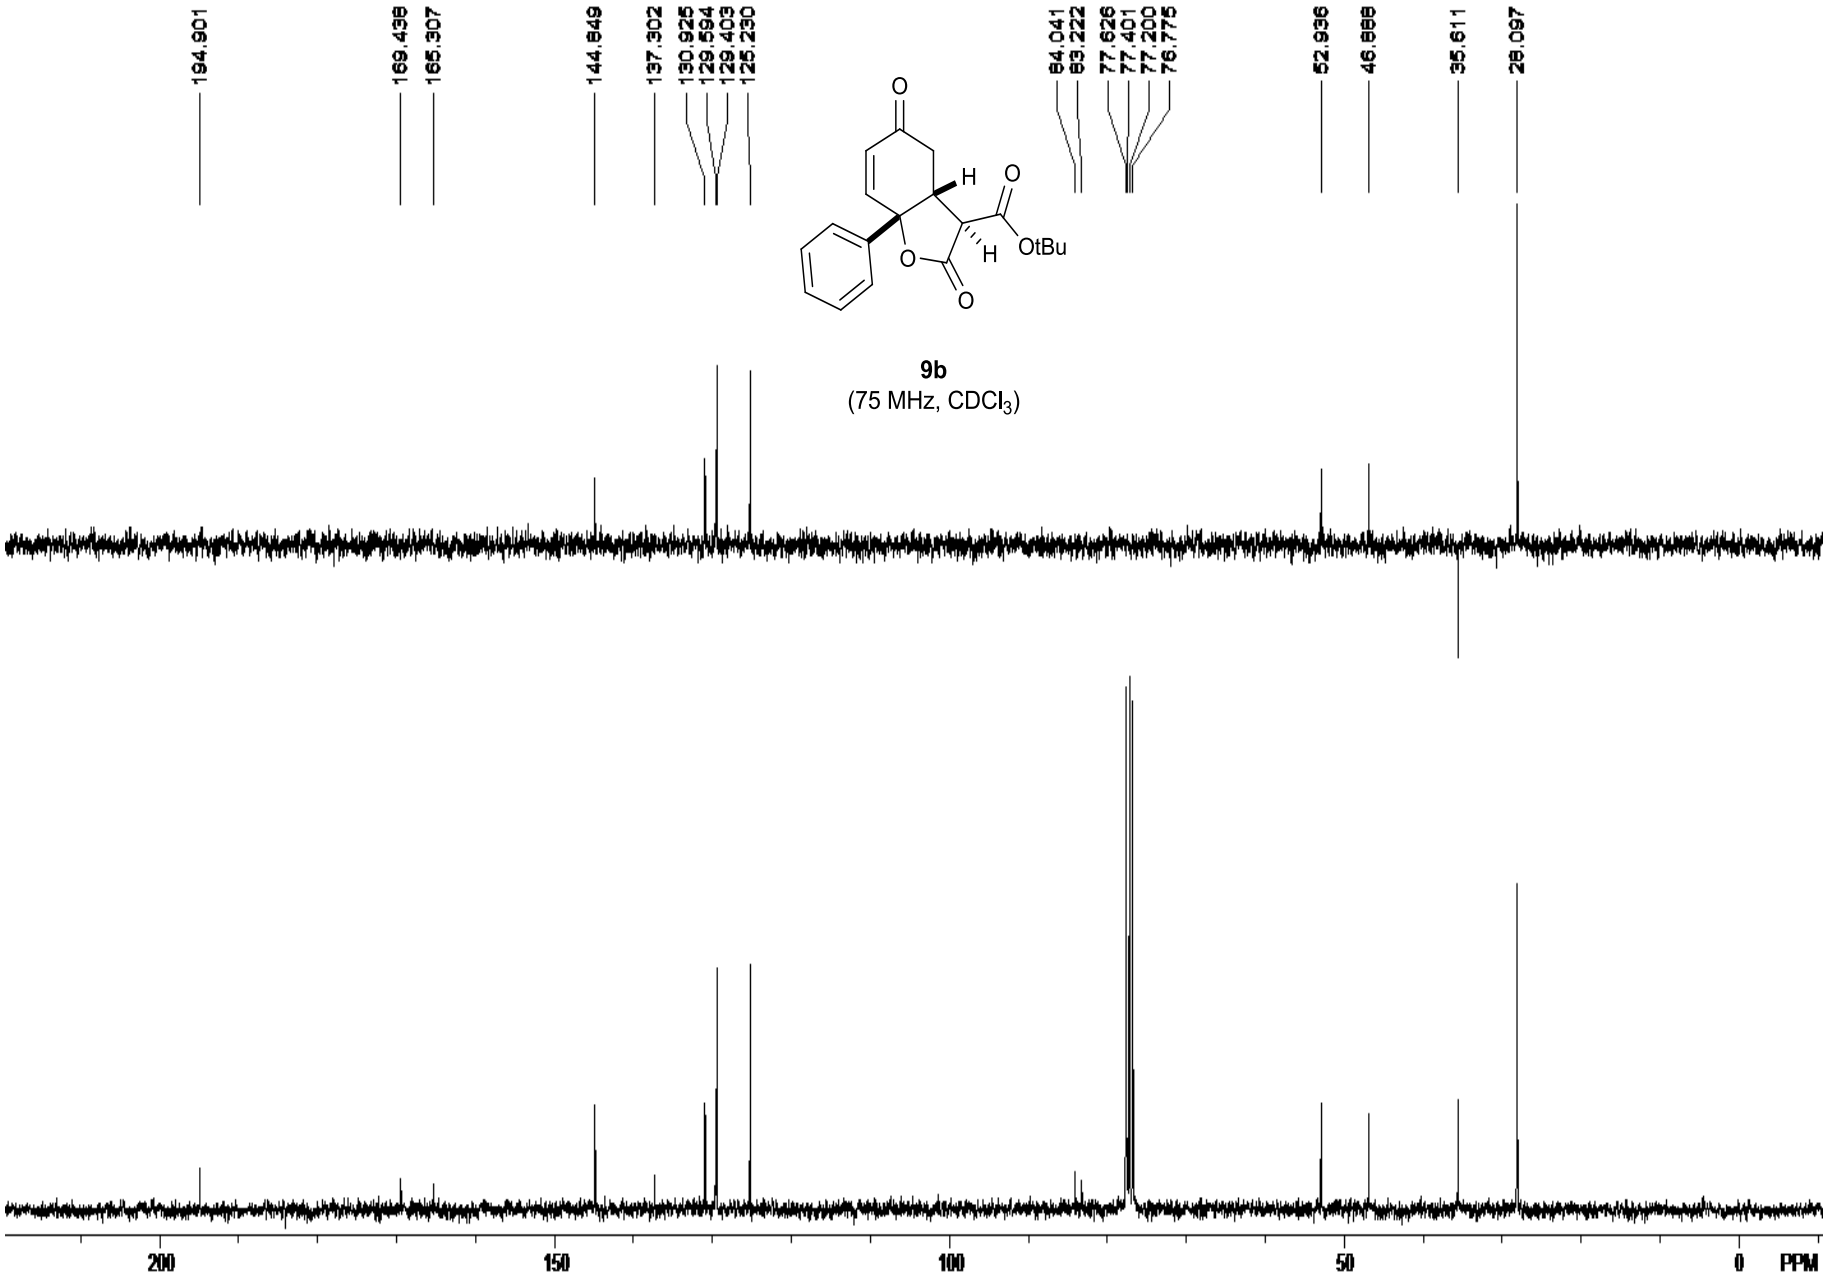

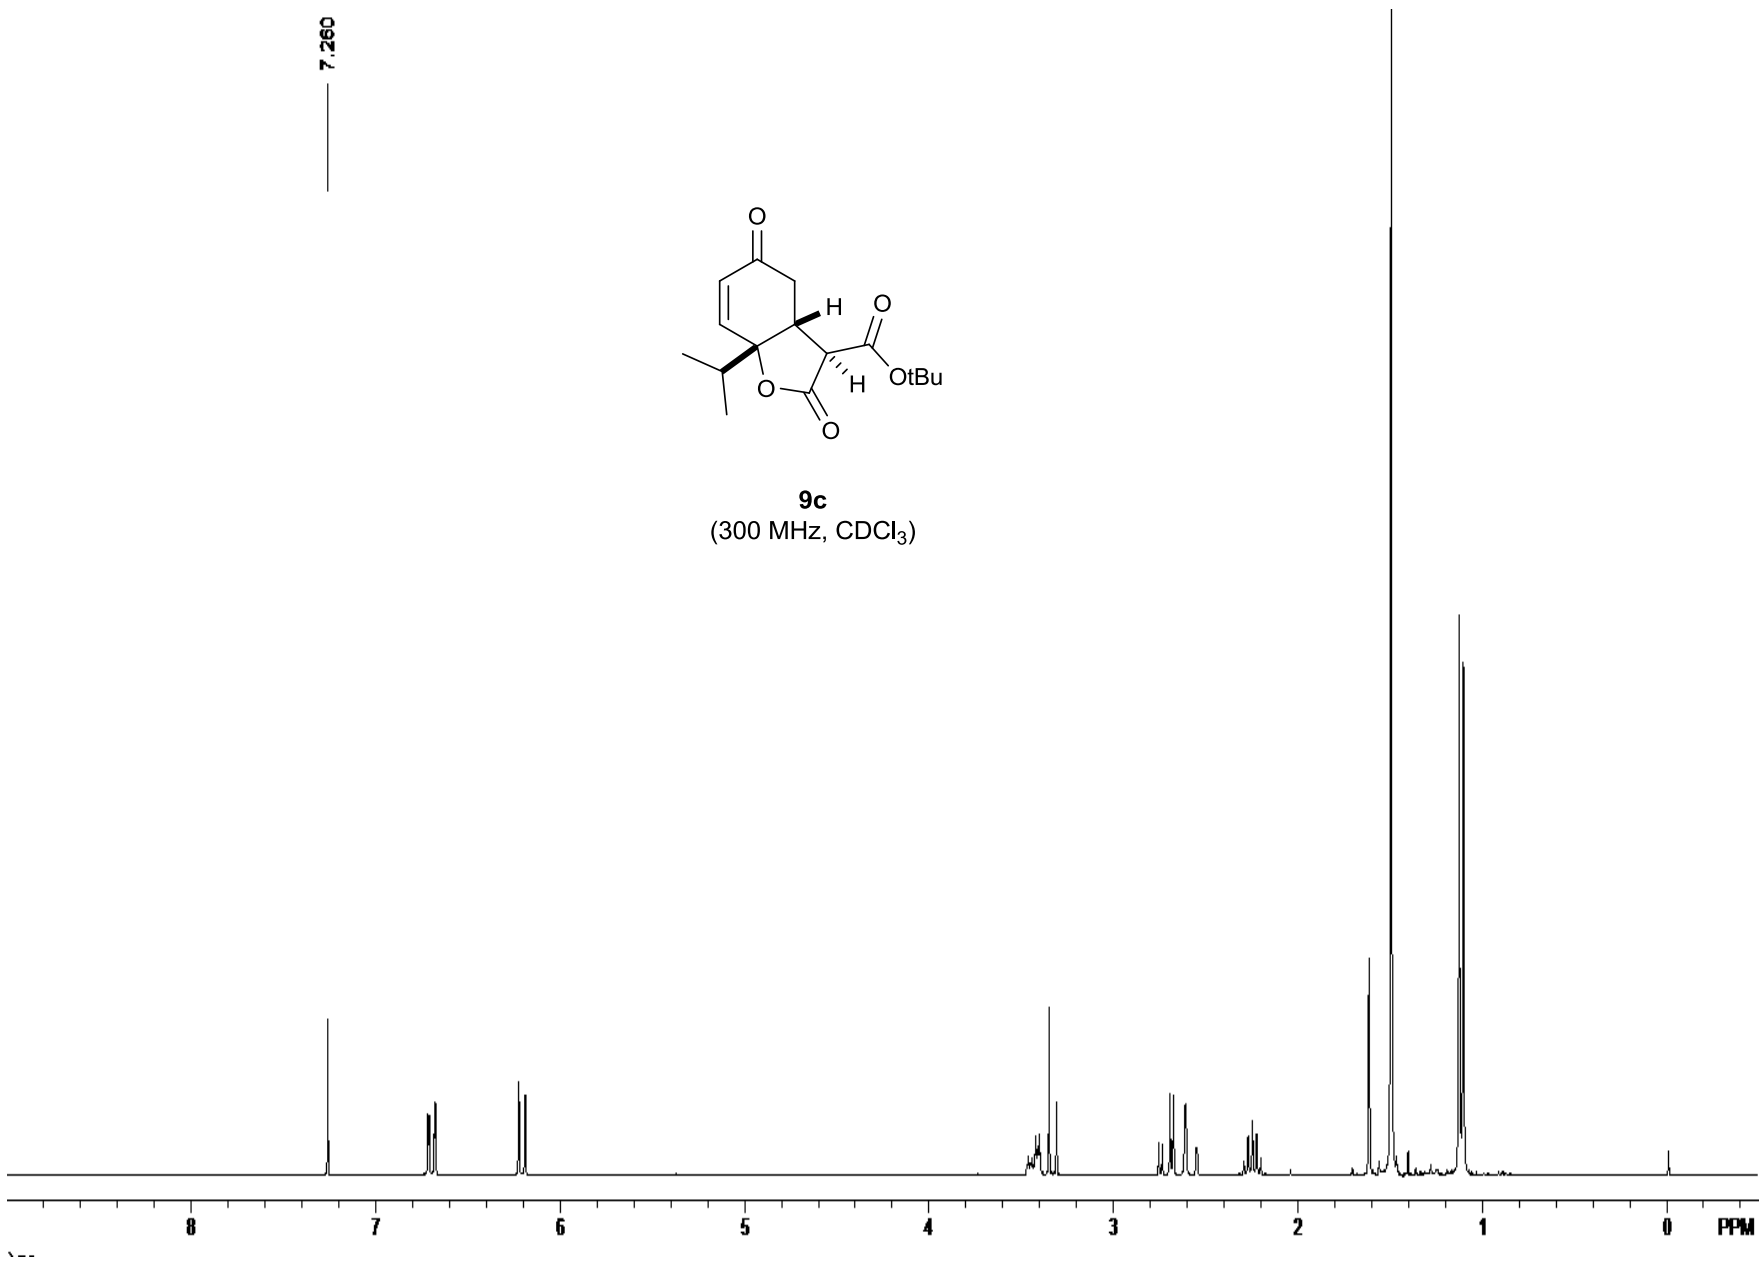

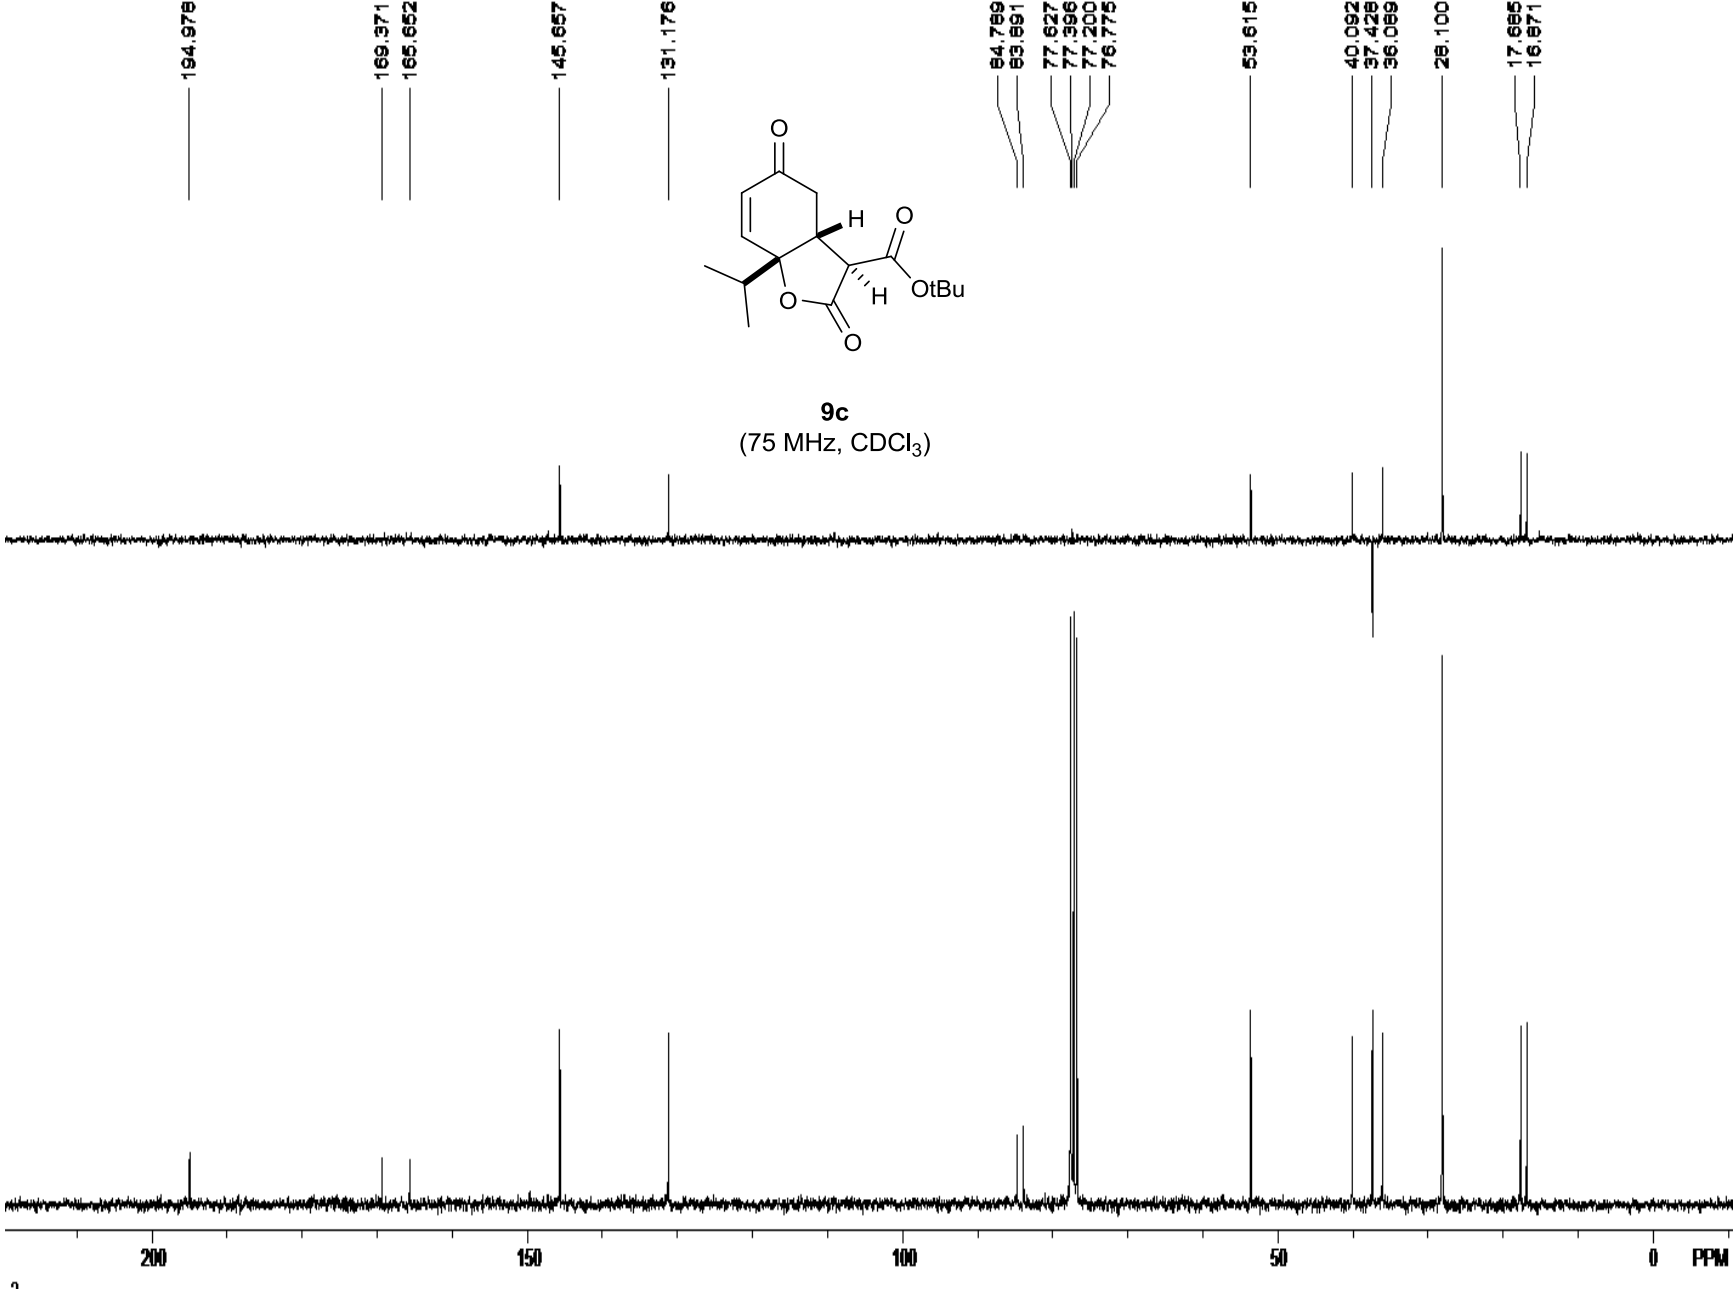

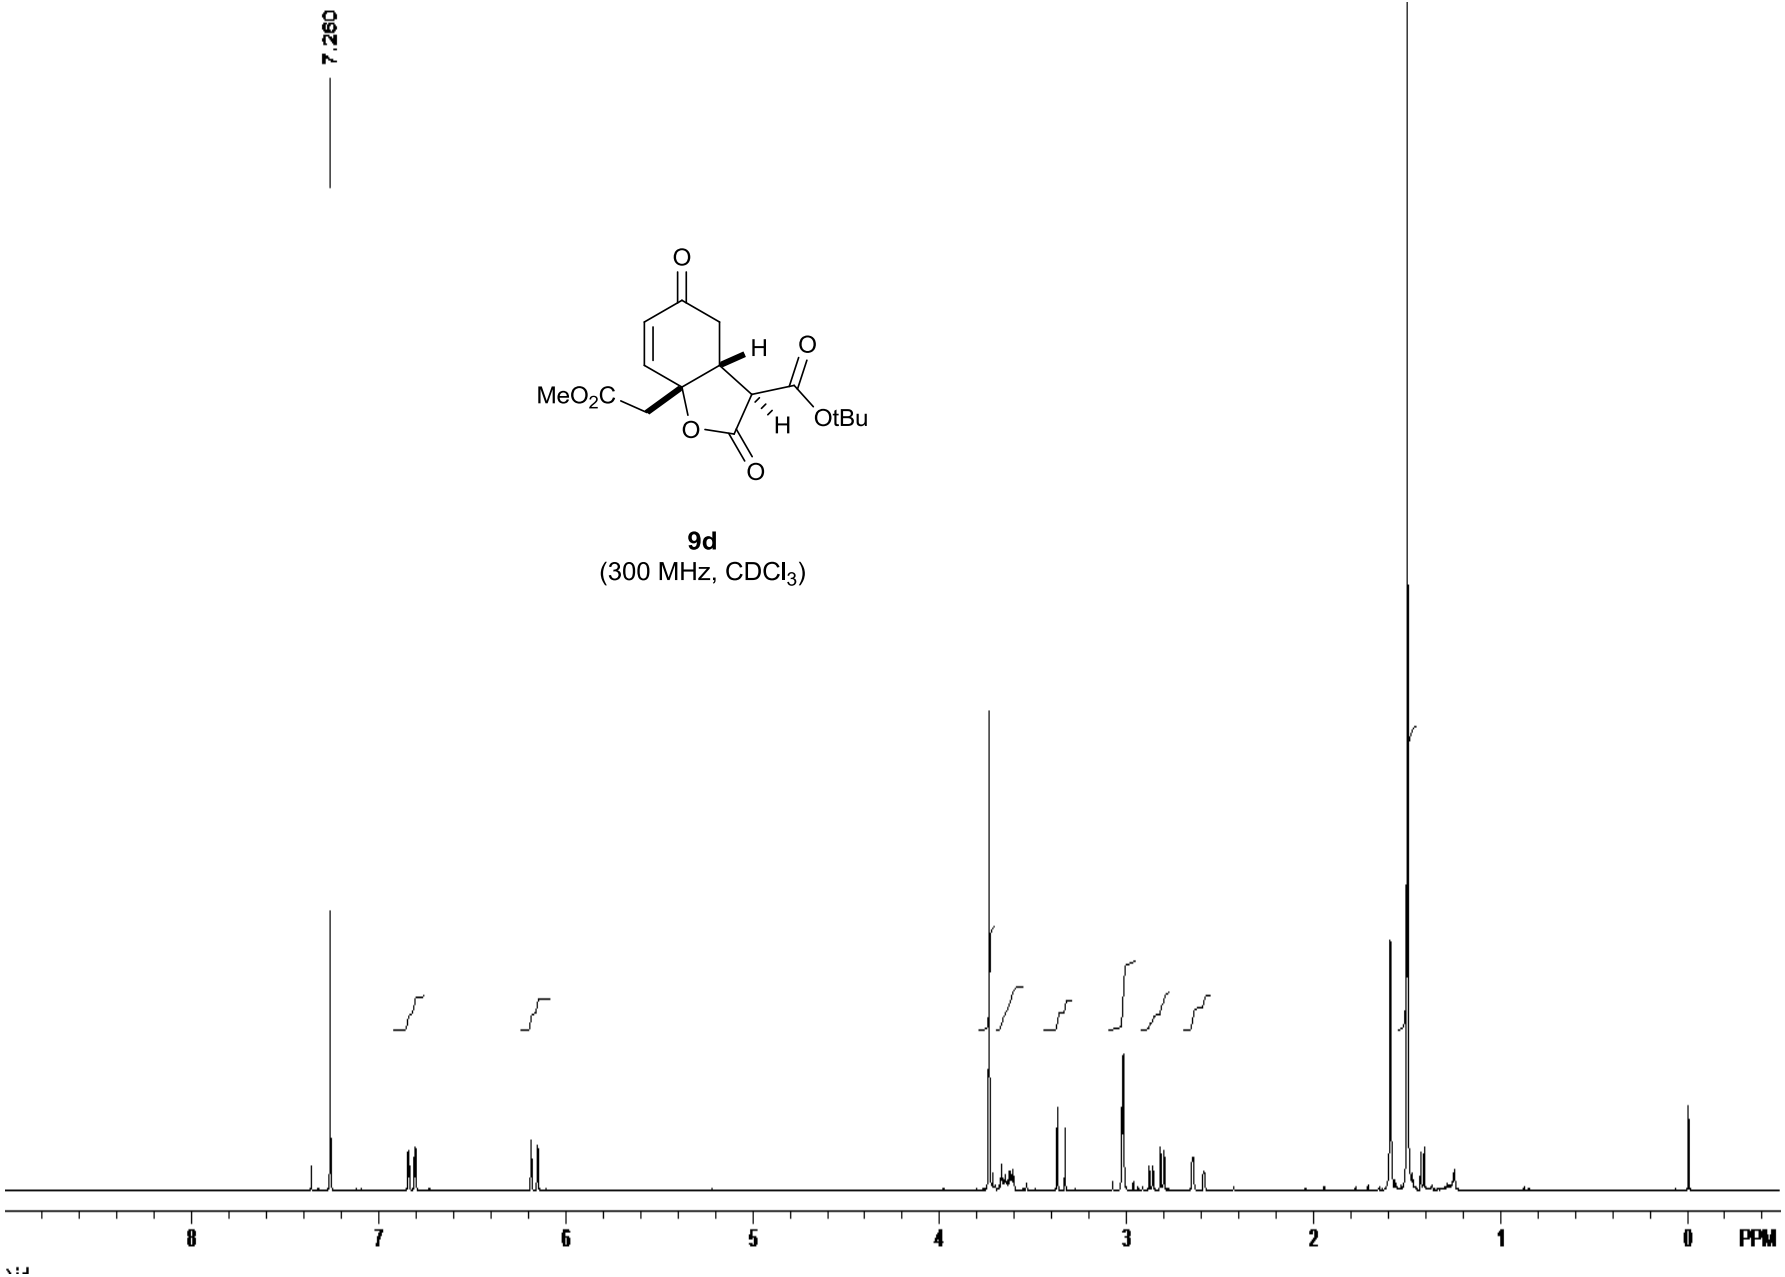

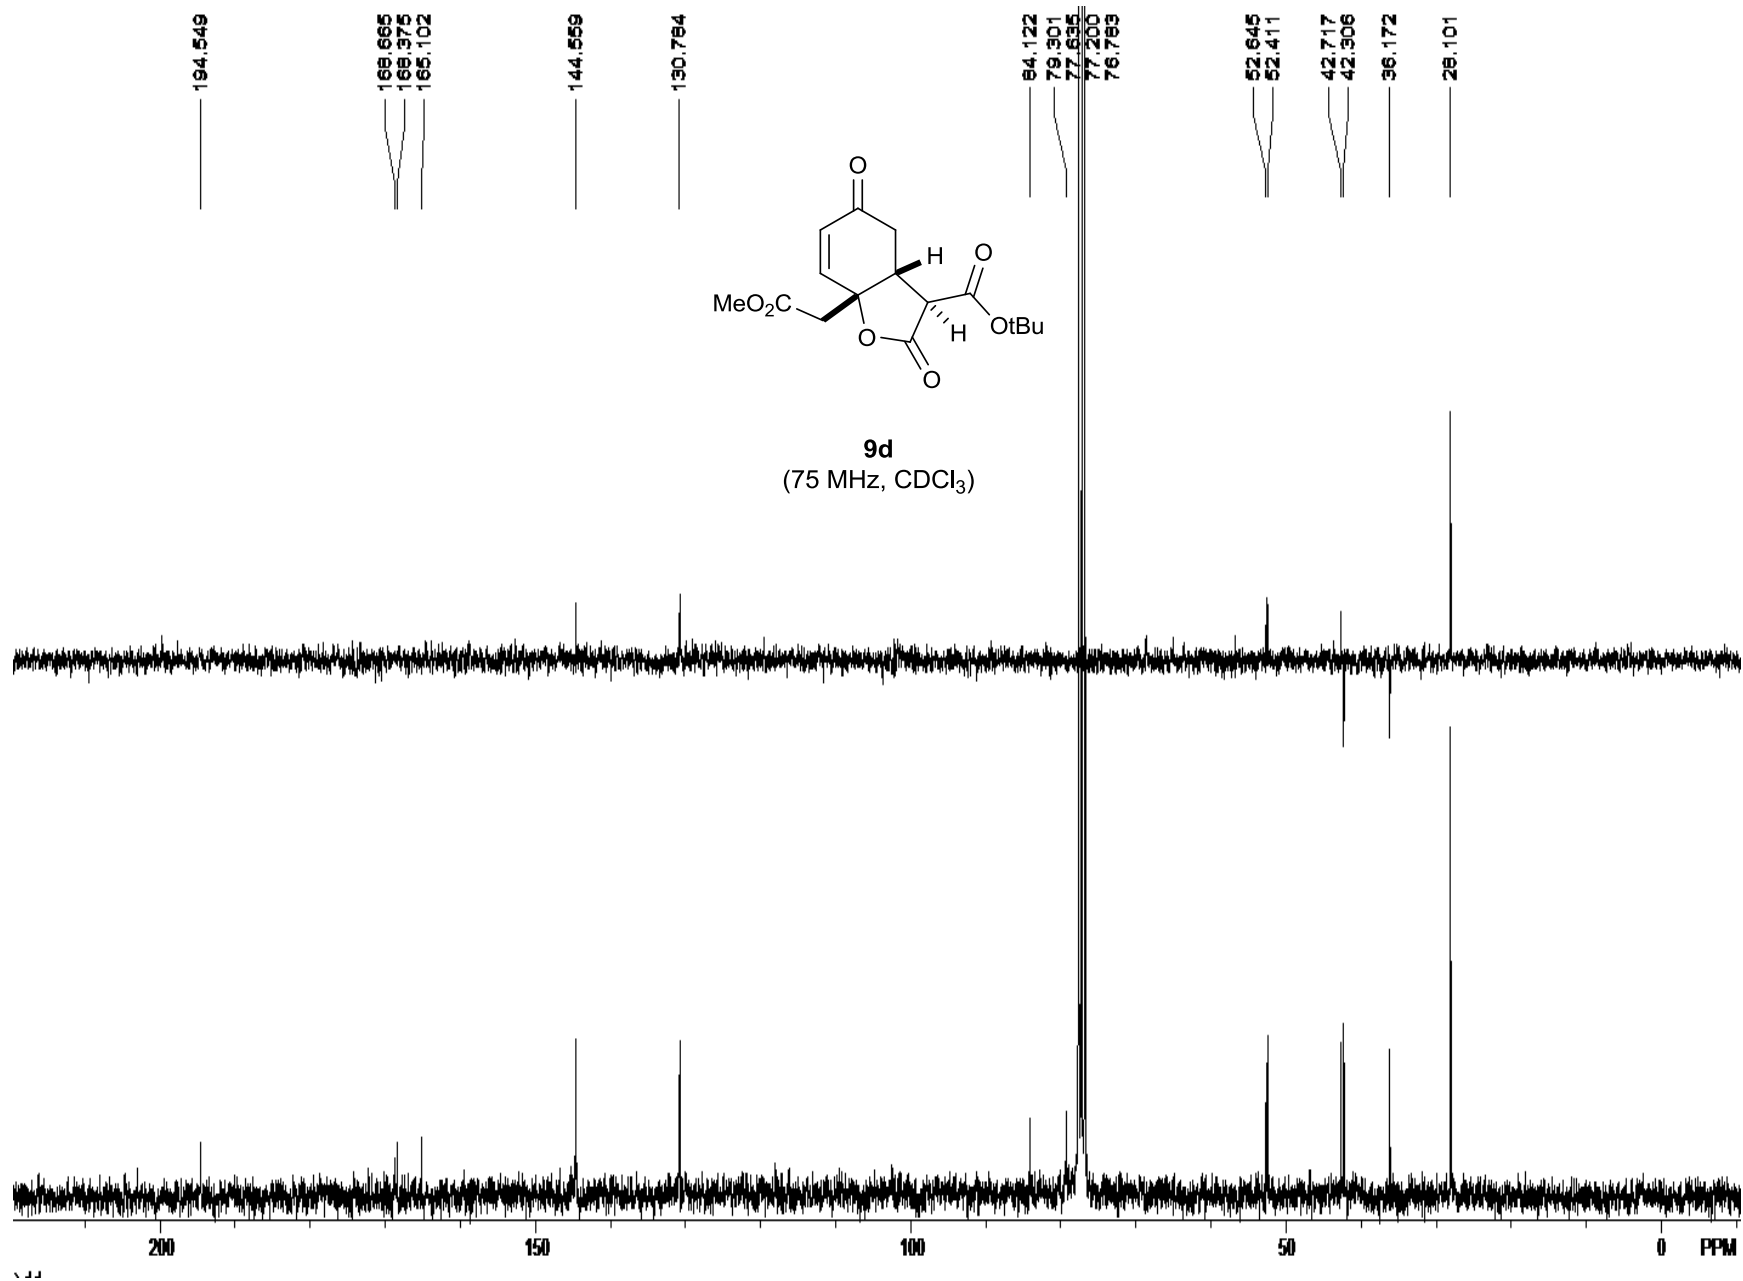

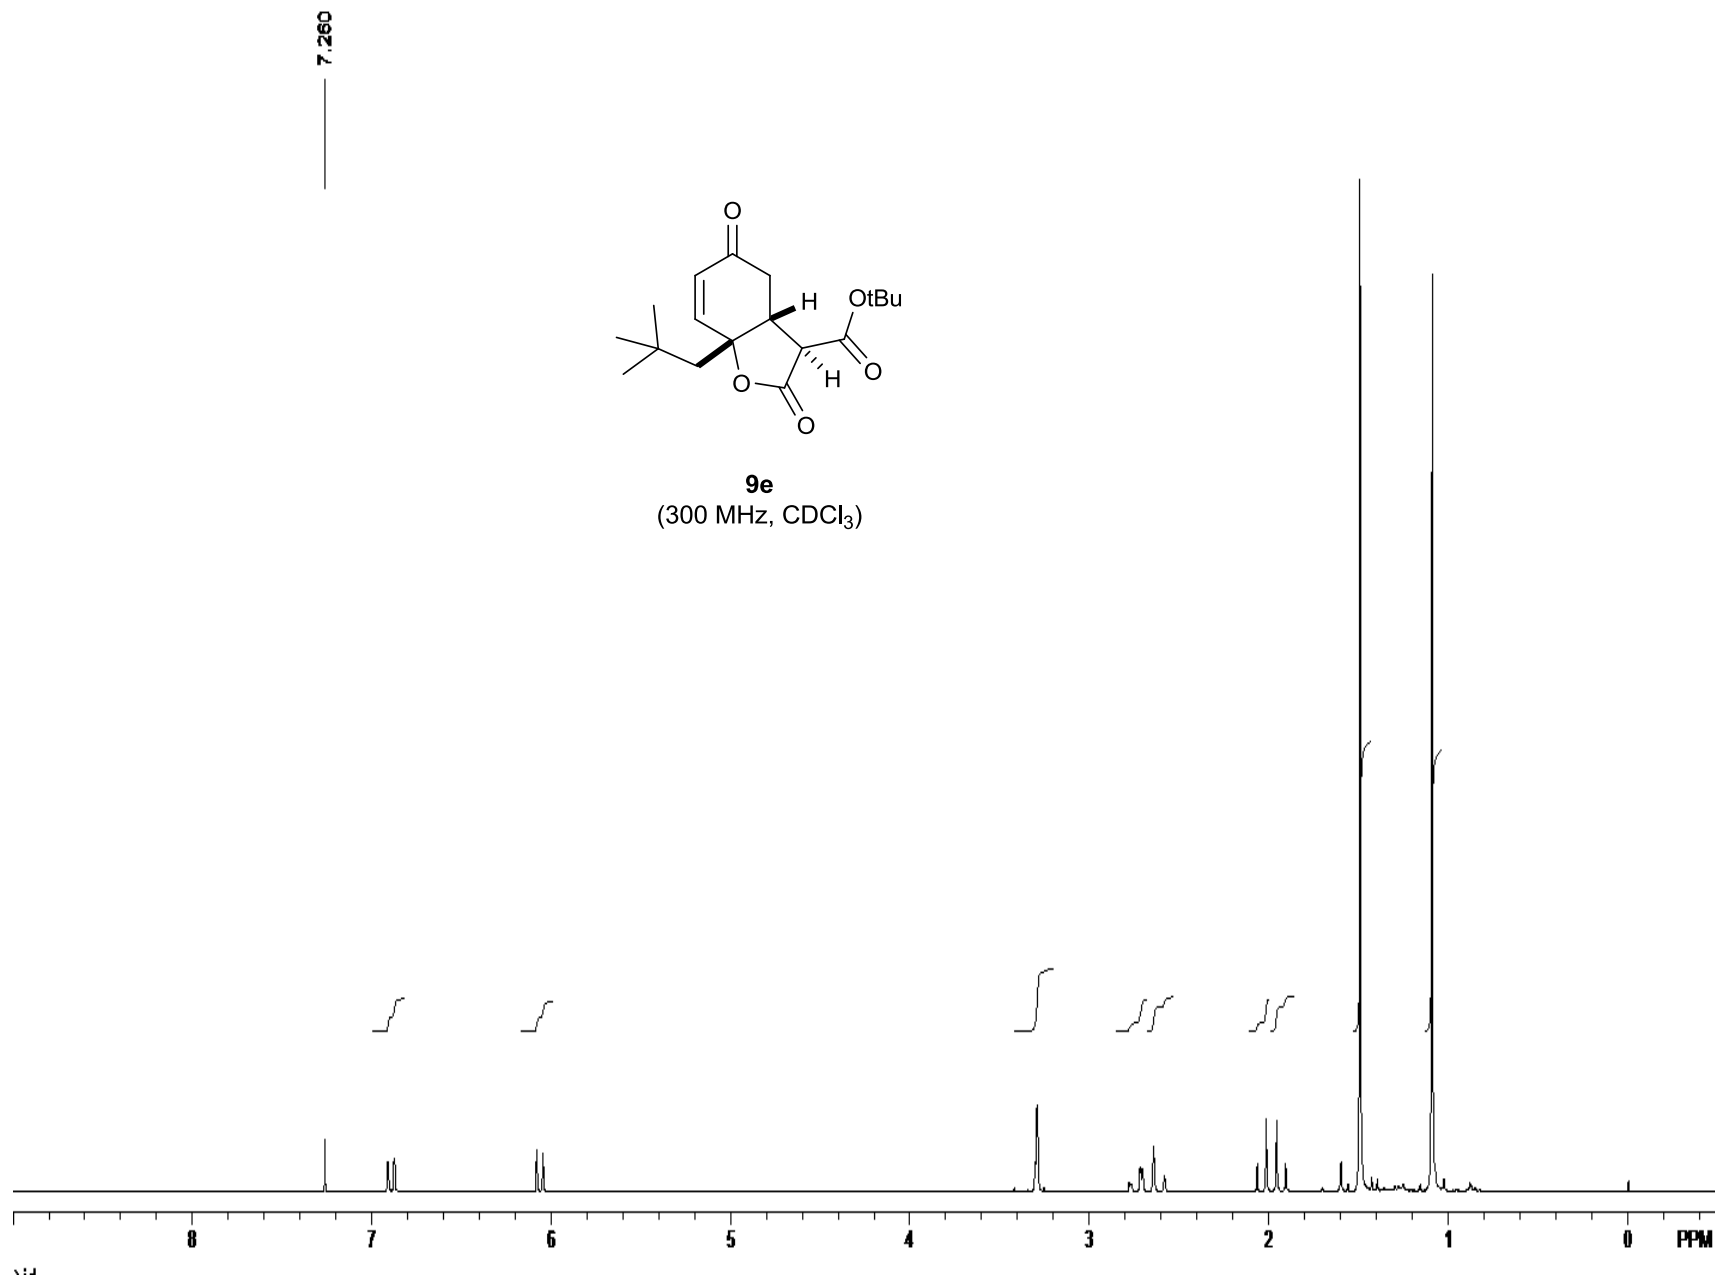

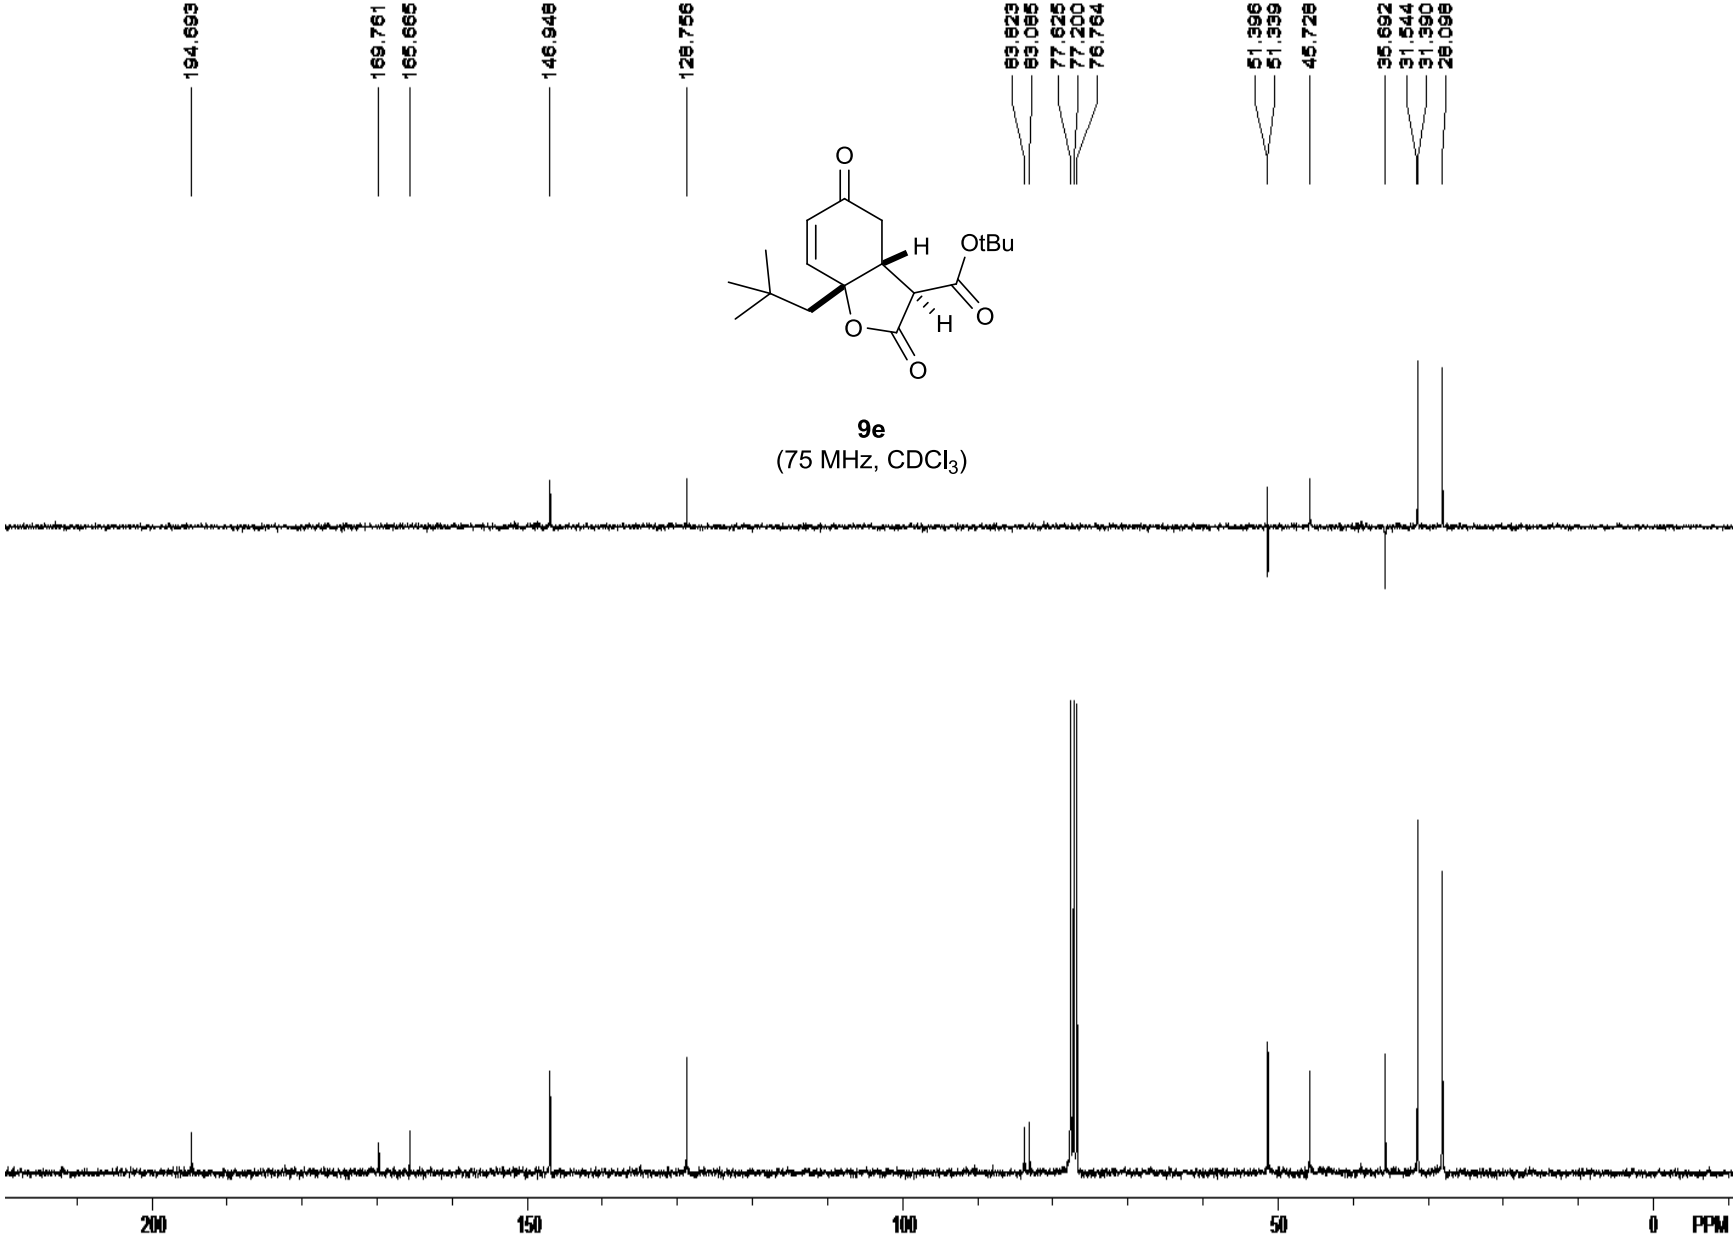

300.17 MHz  
cdcl3

7.26

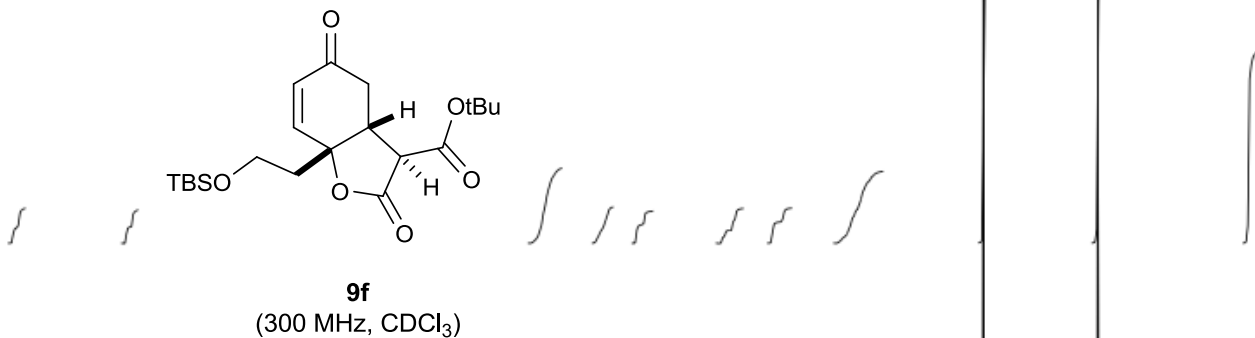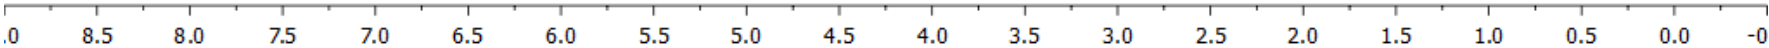



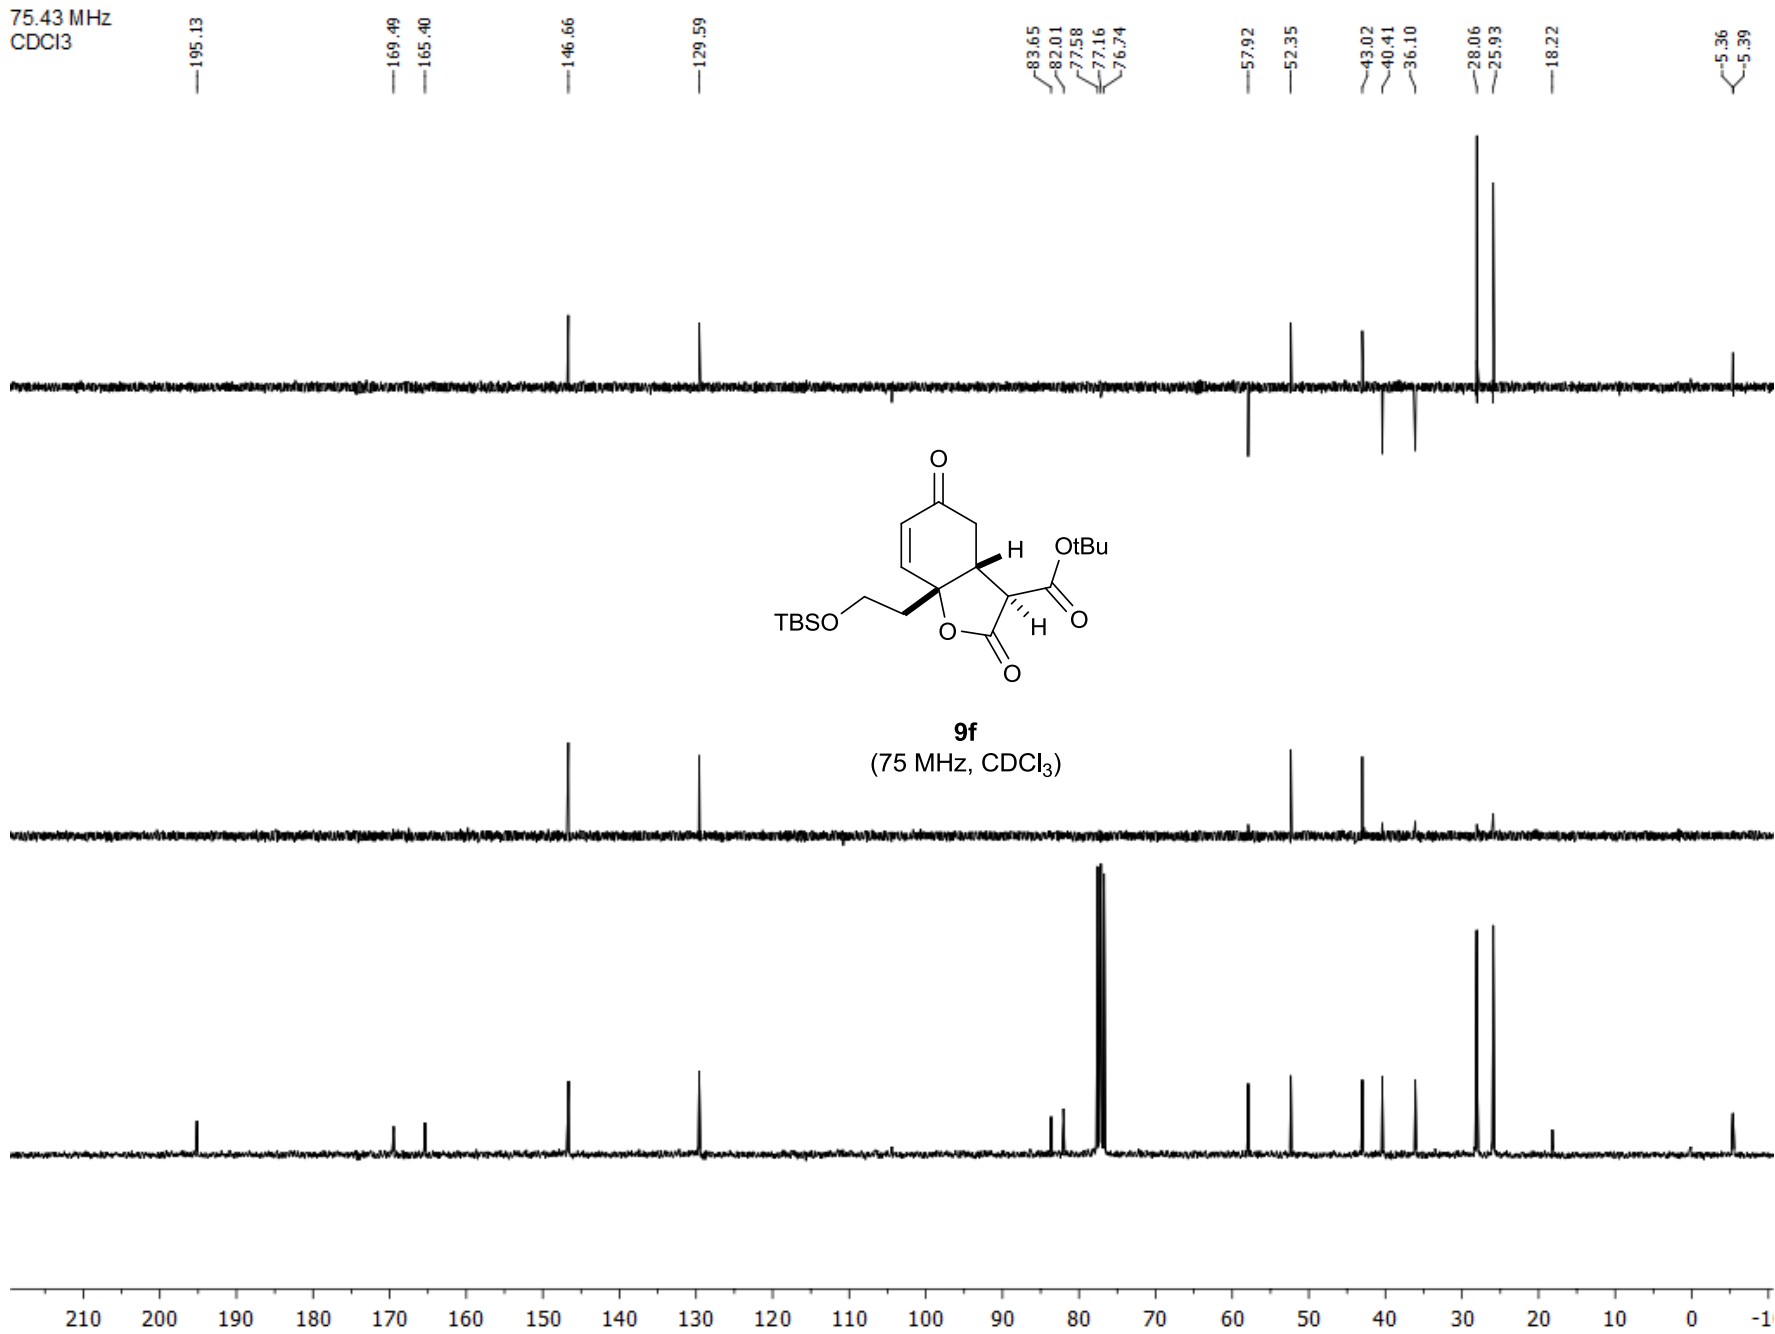

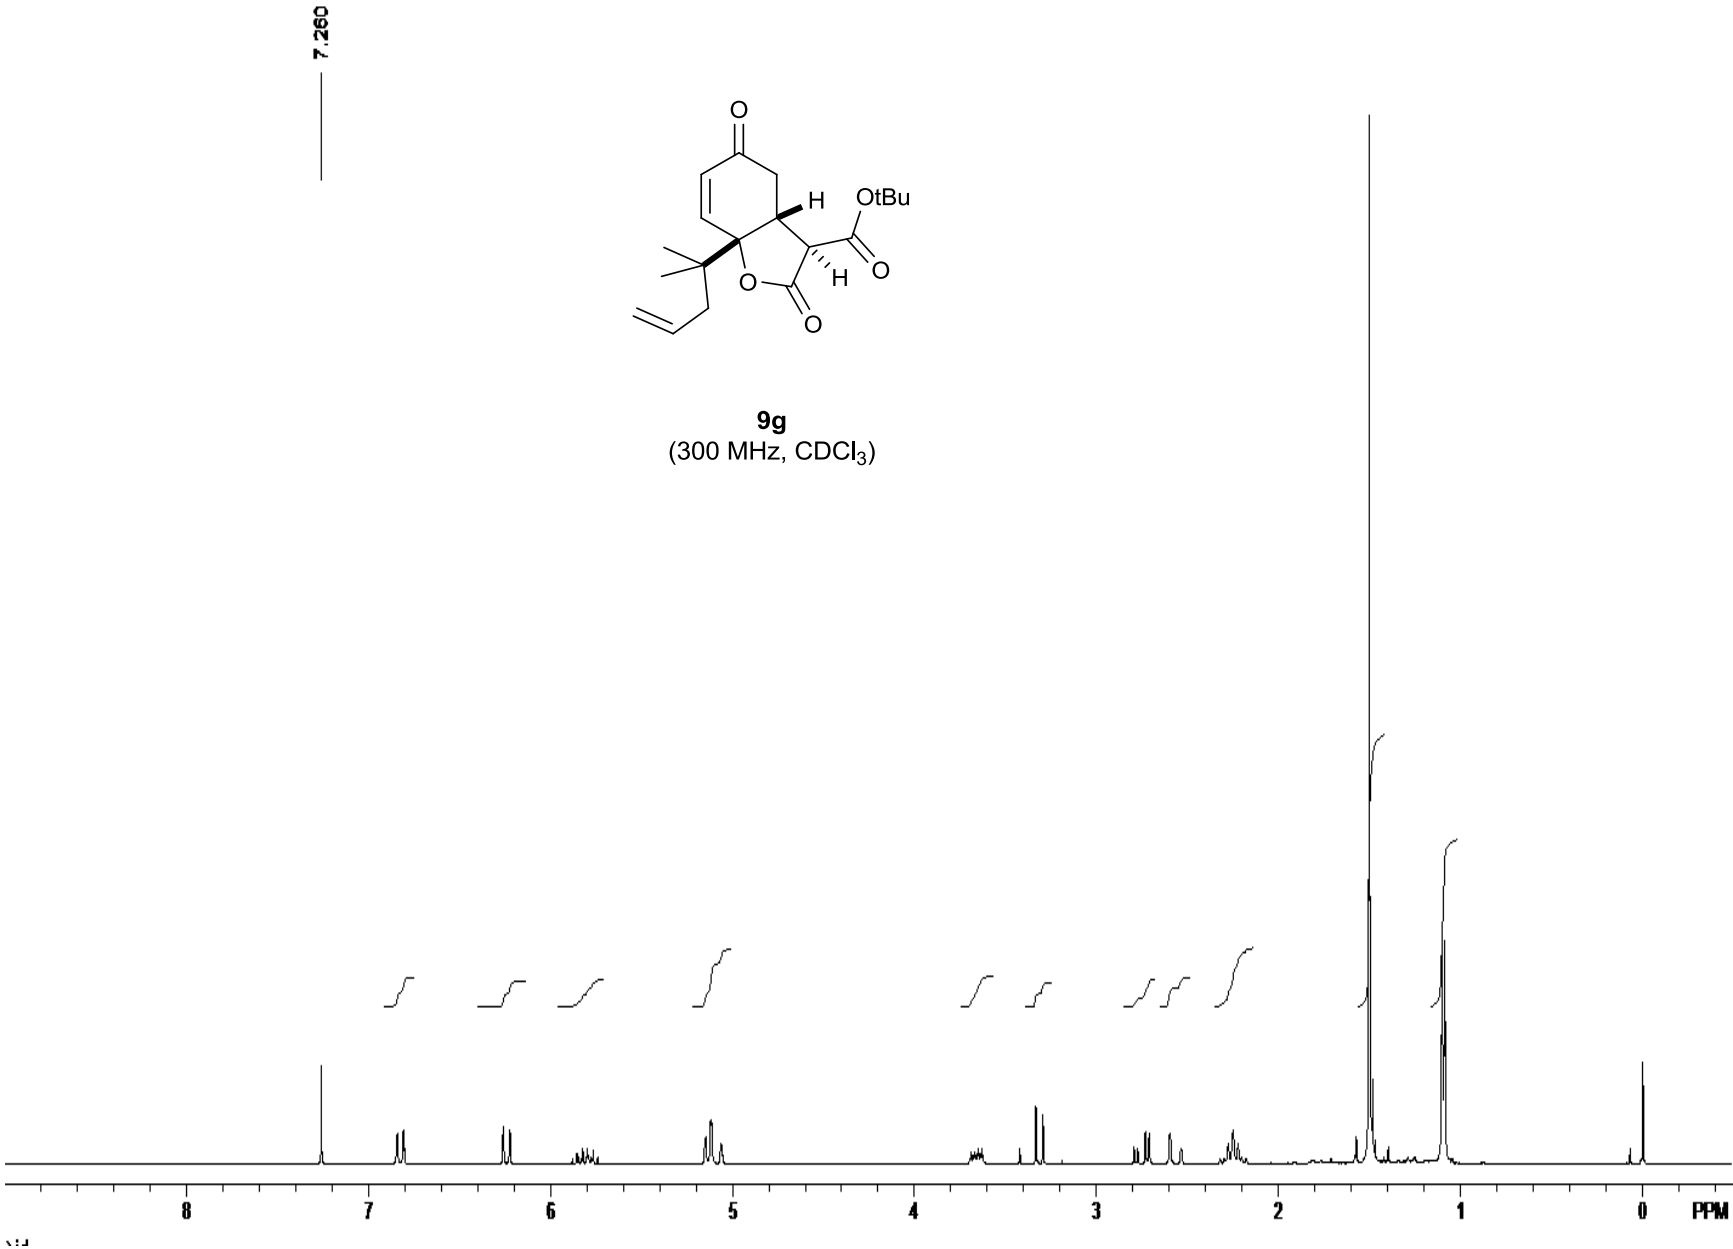

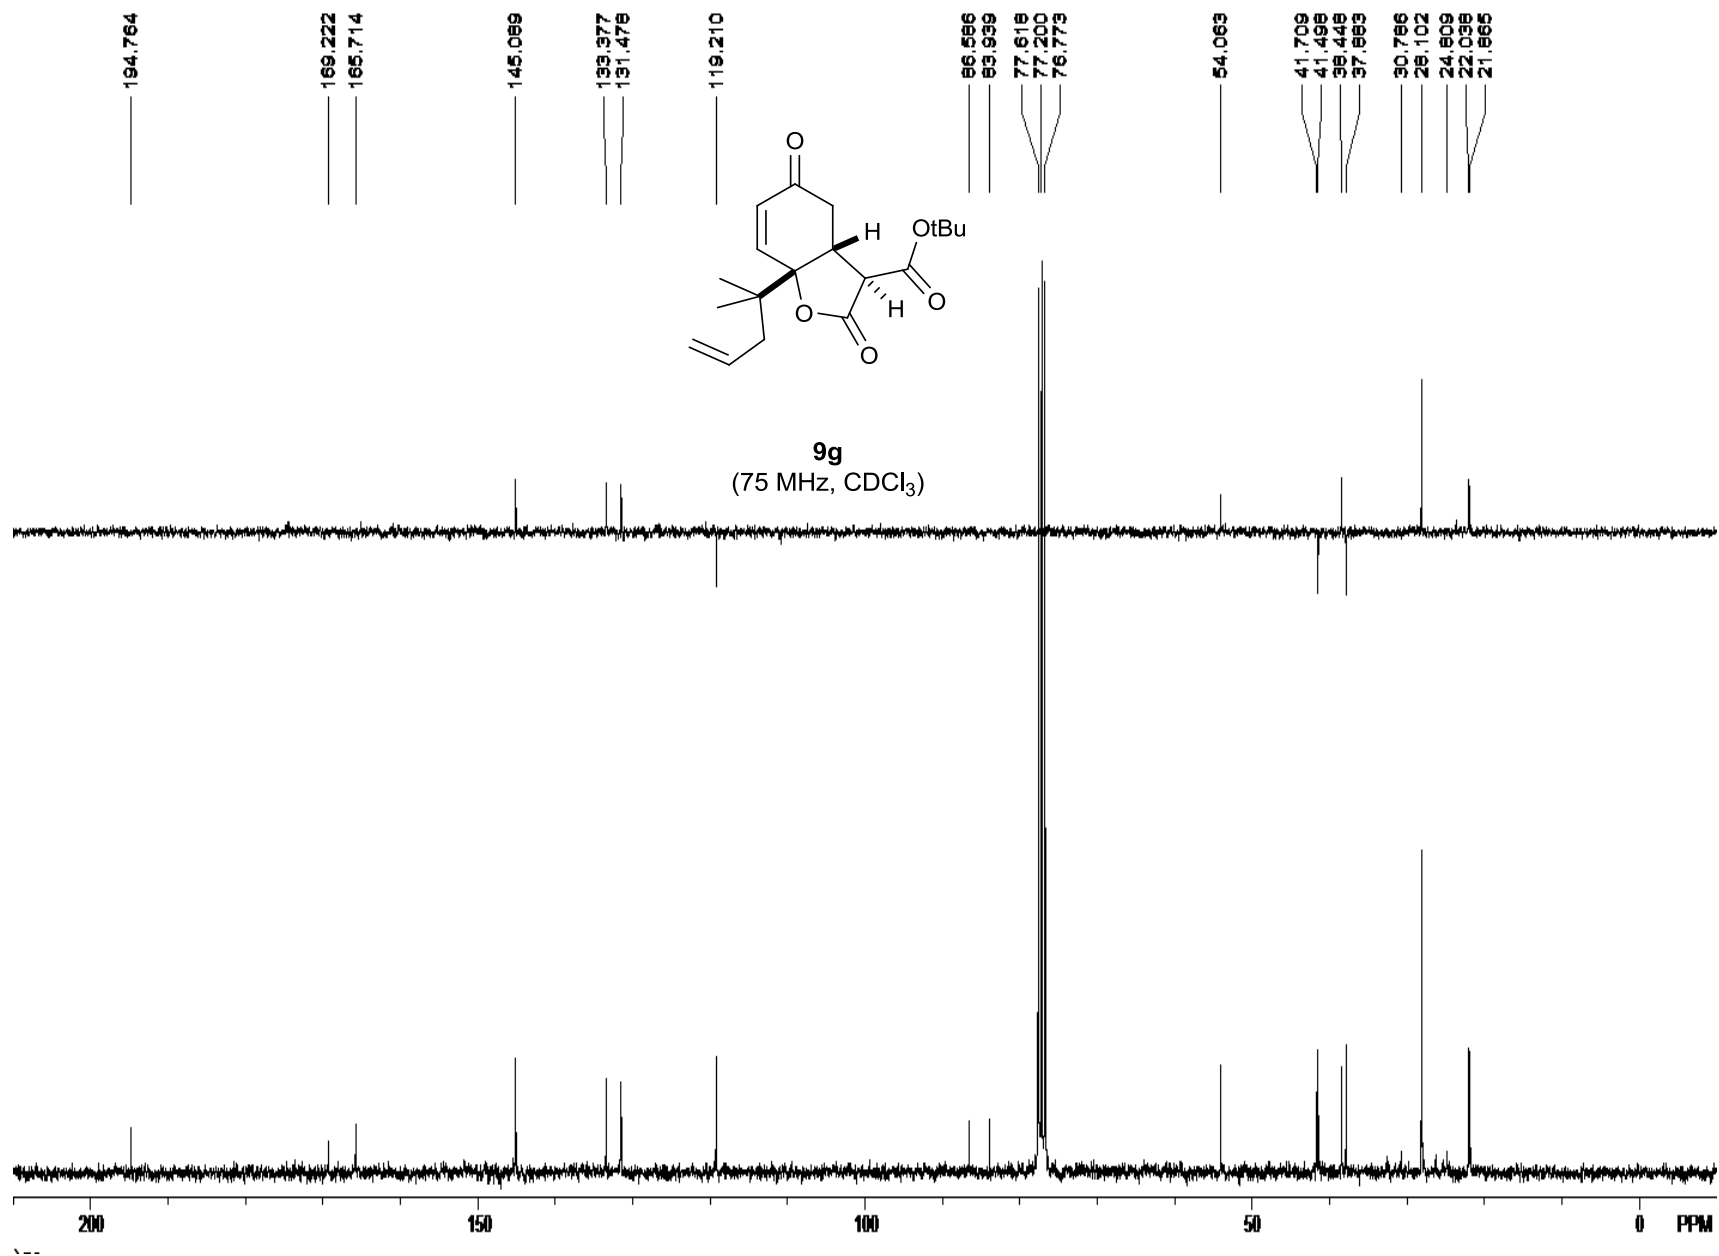

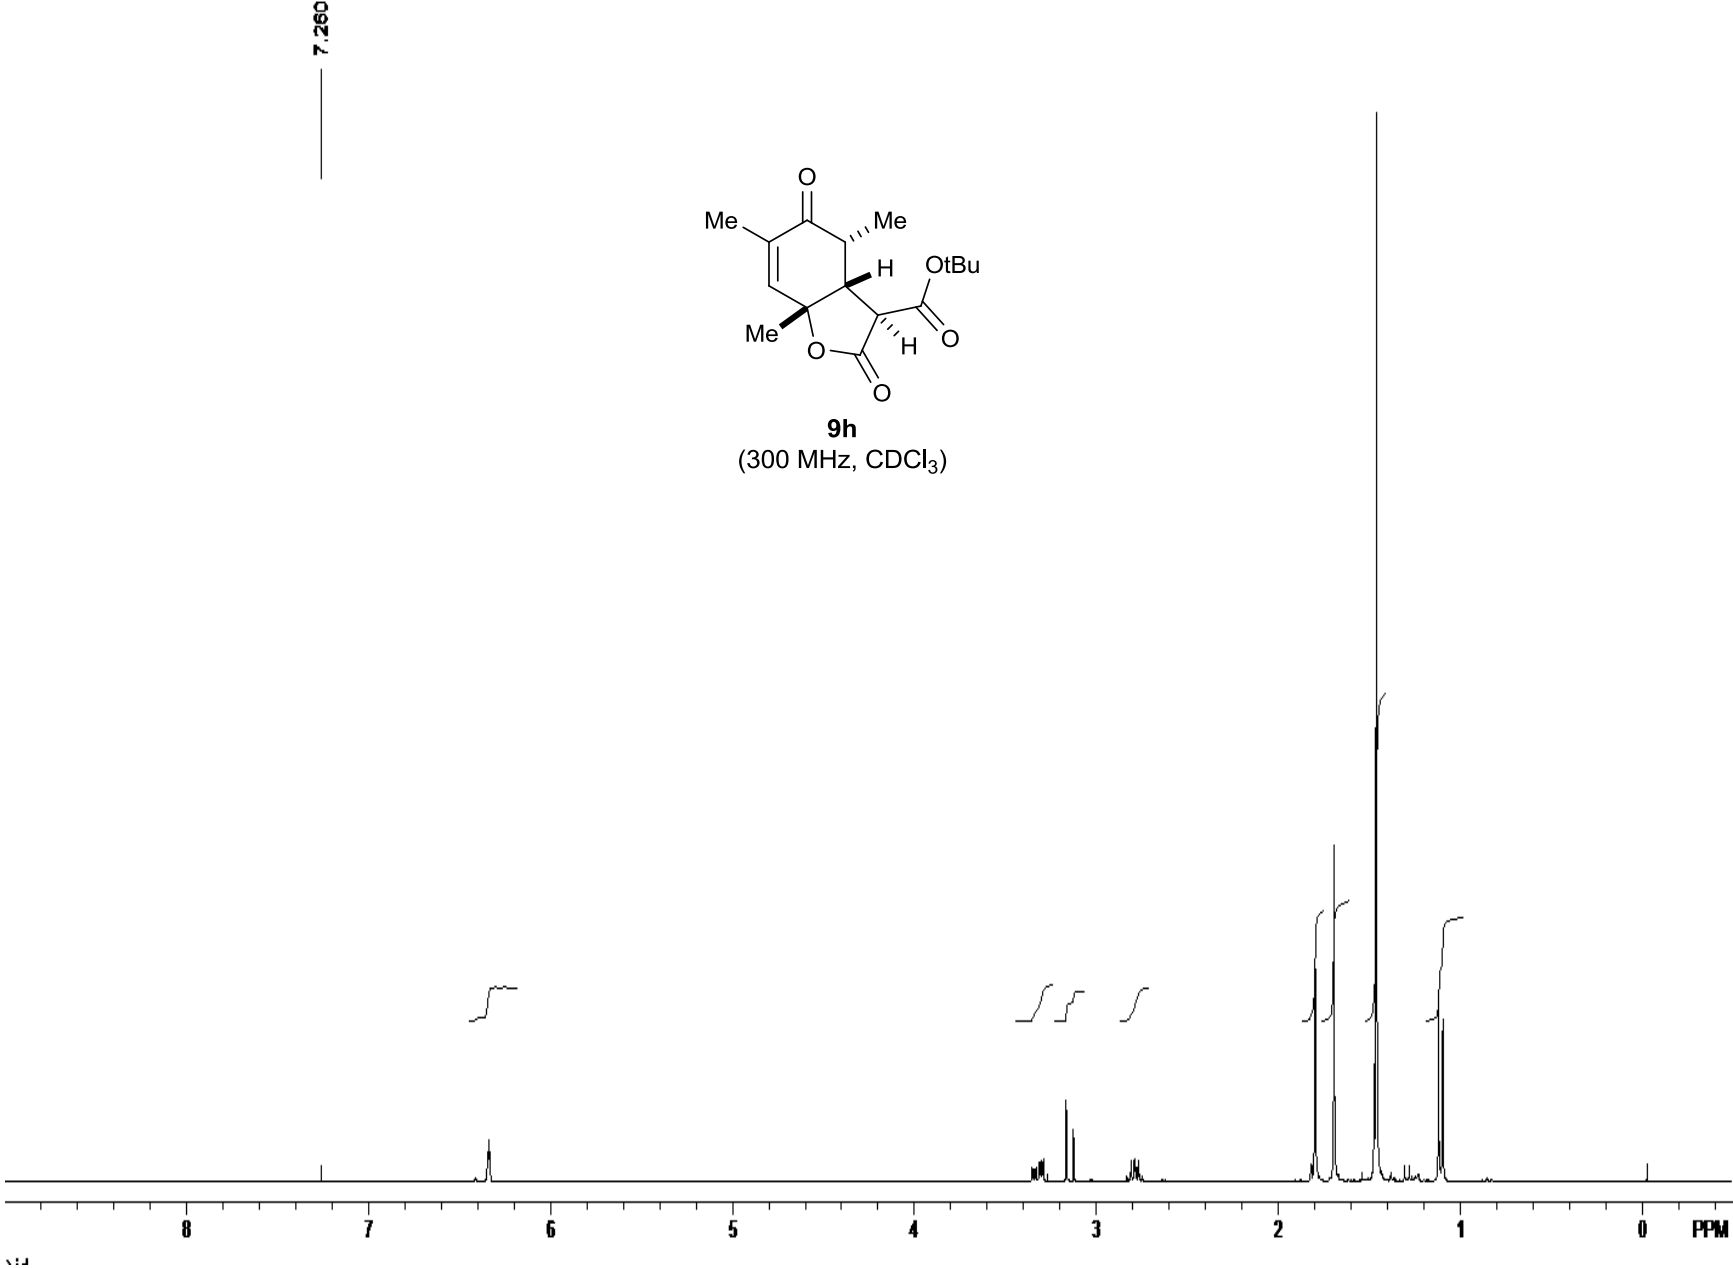

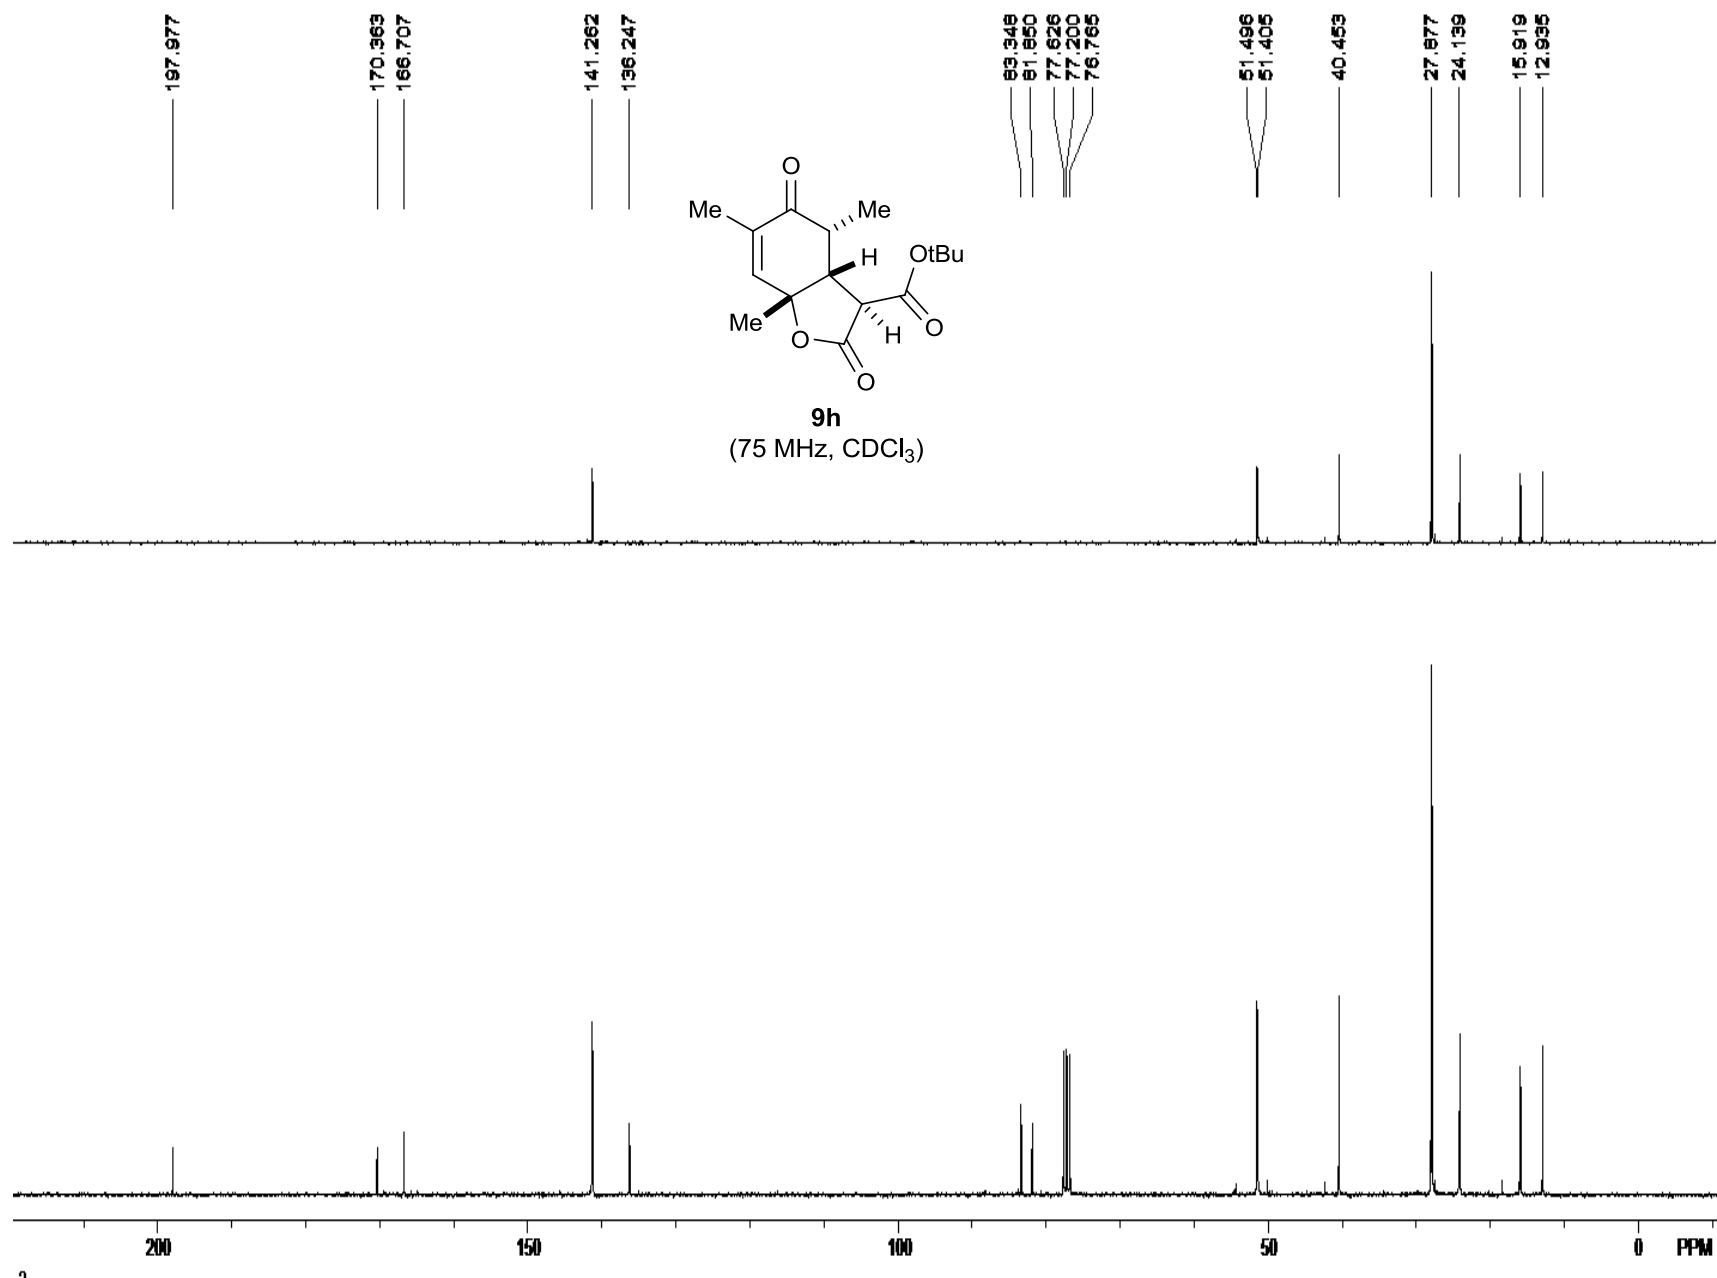

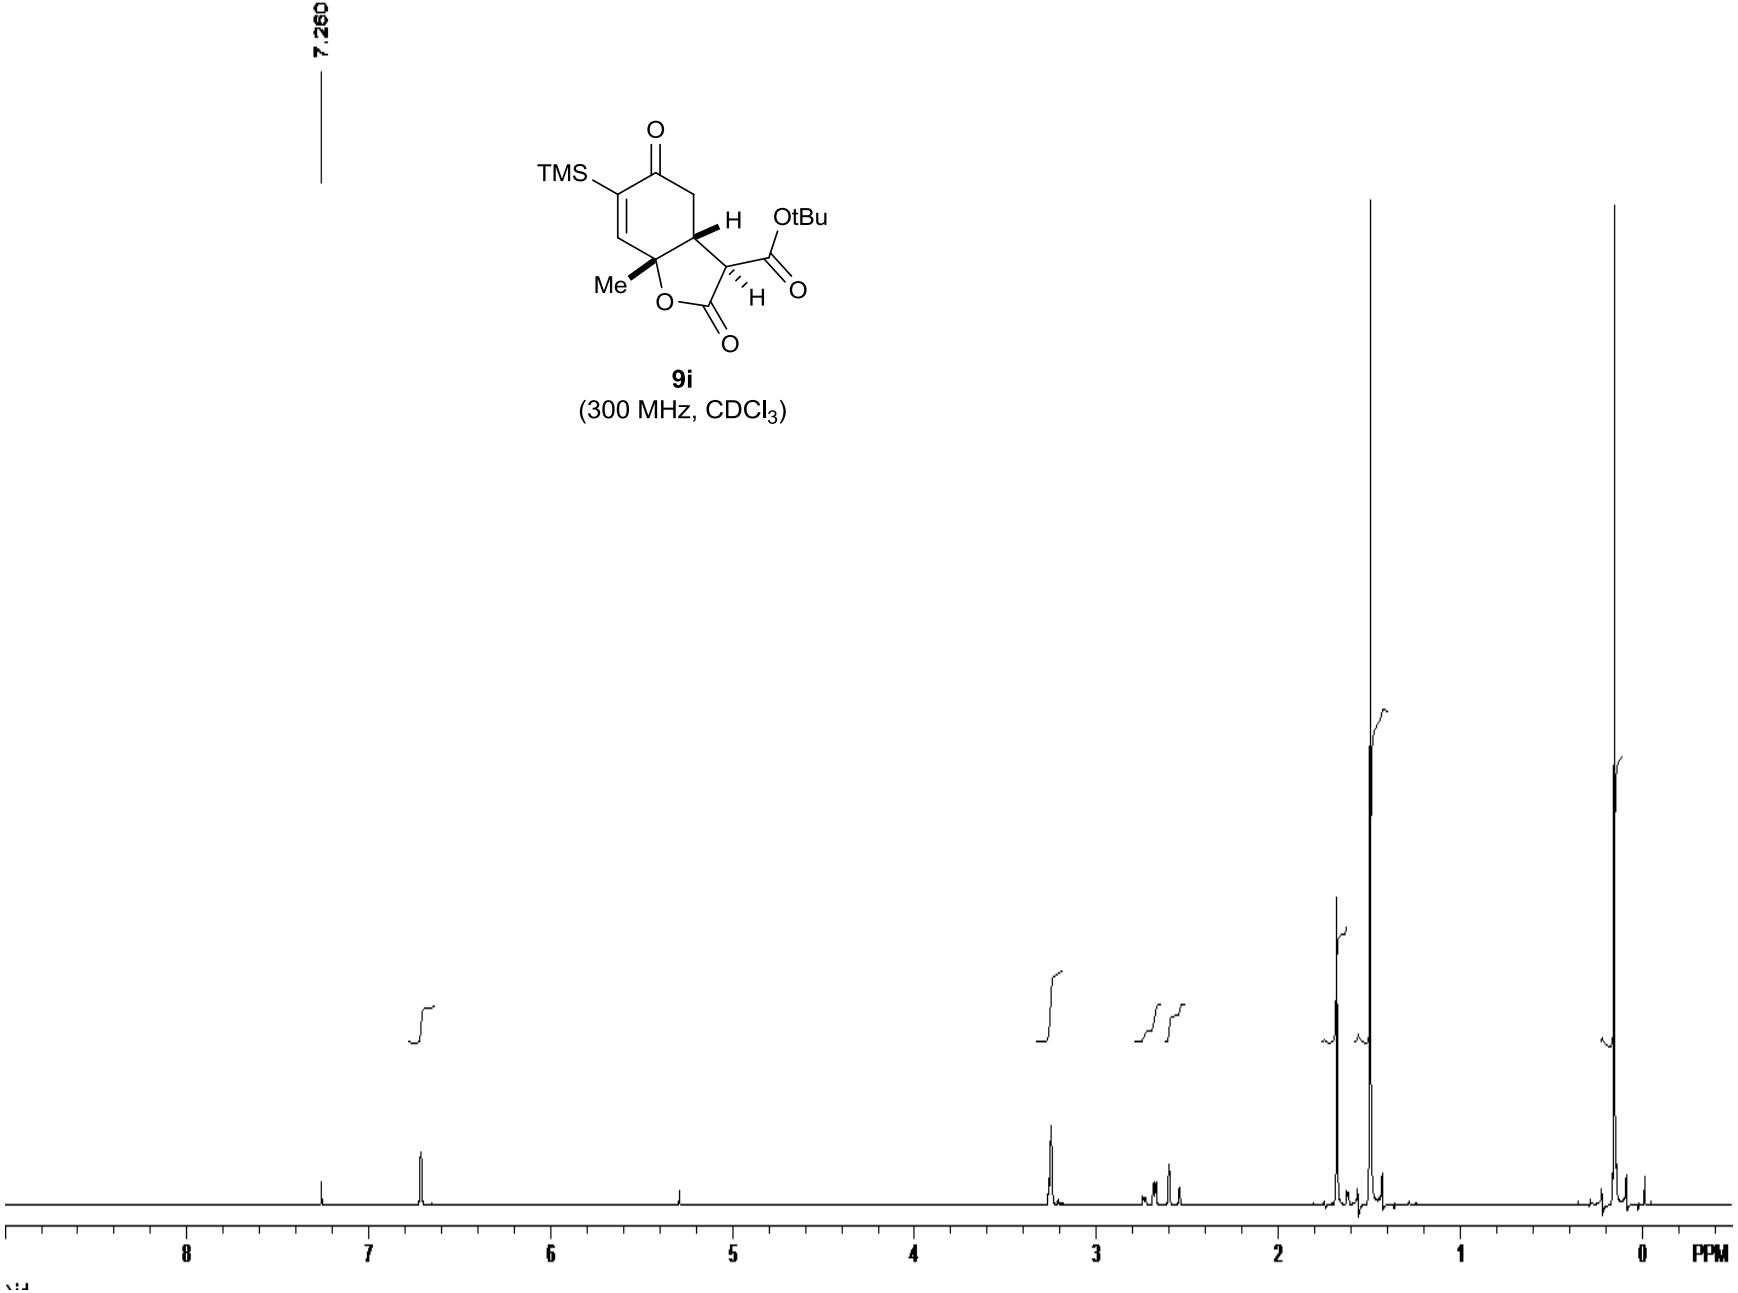

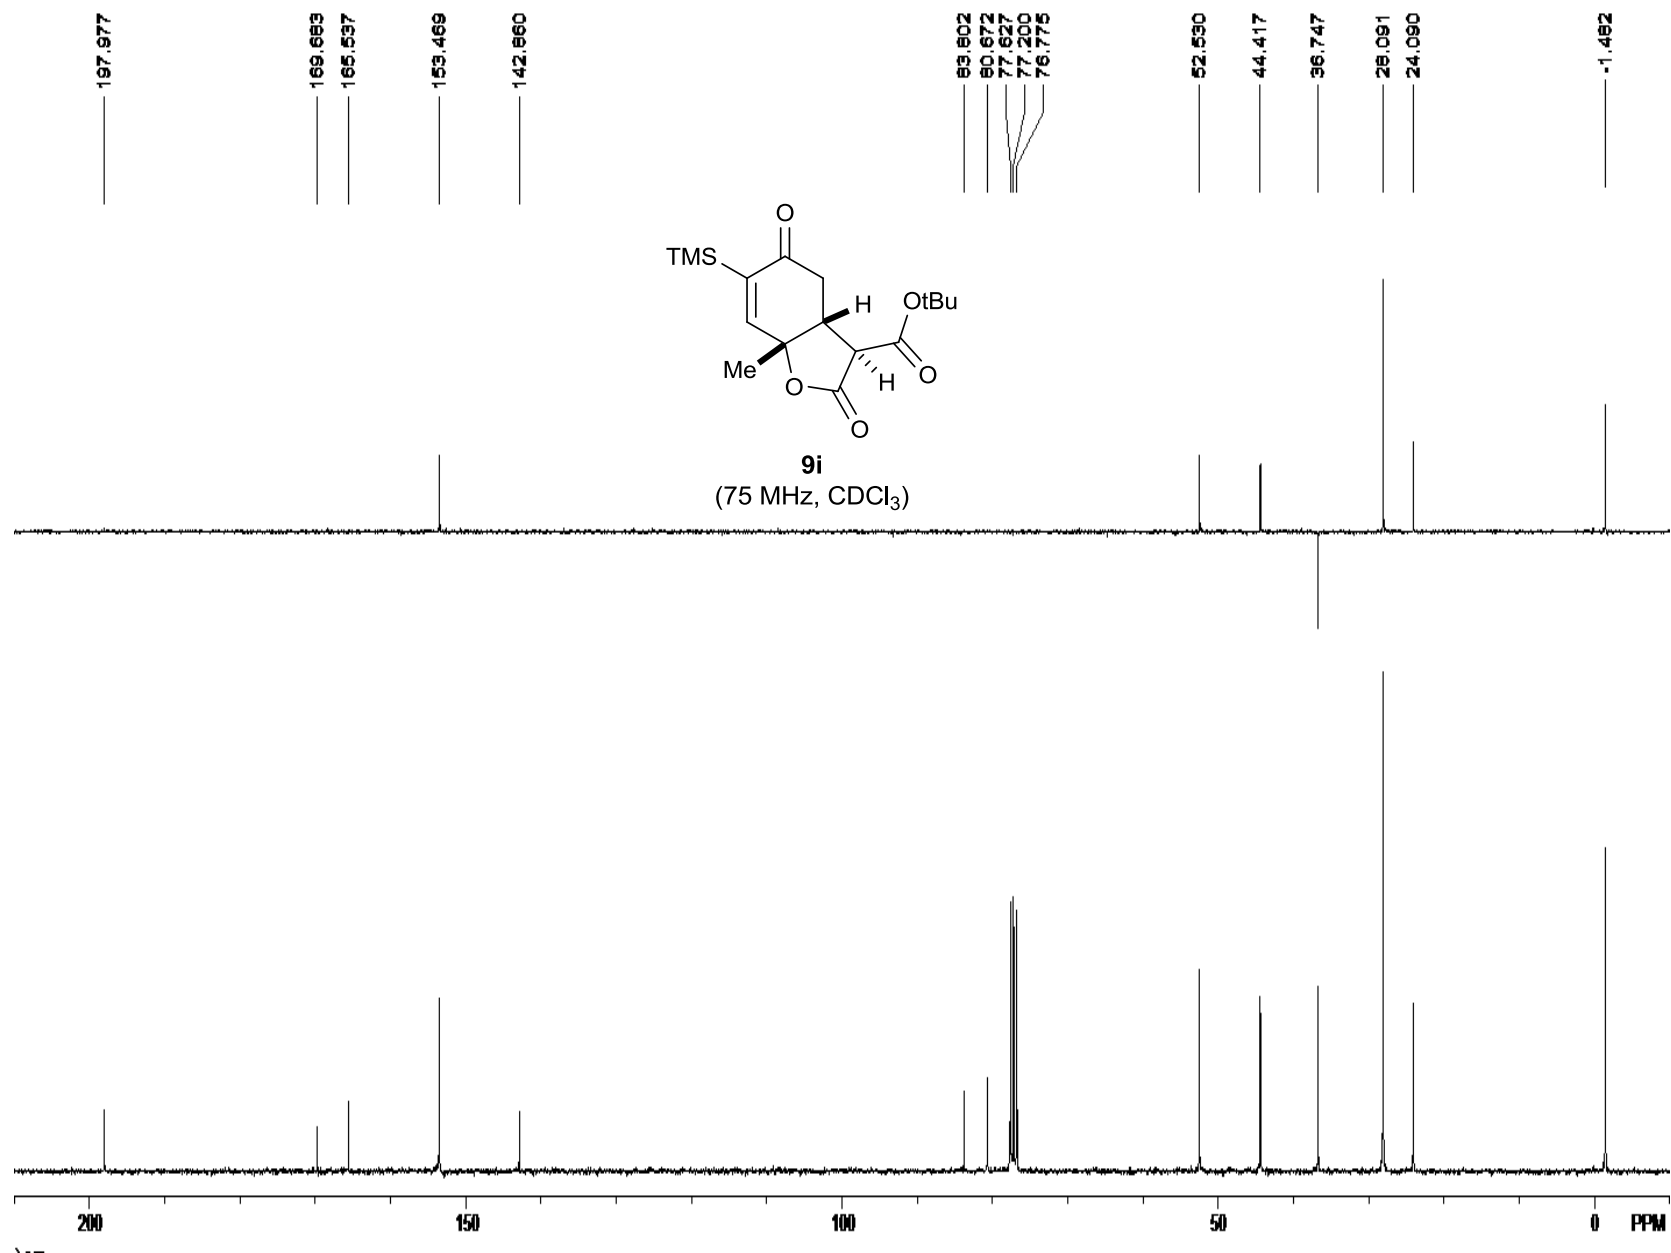

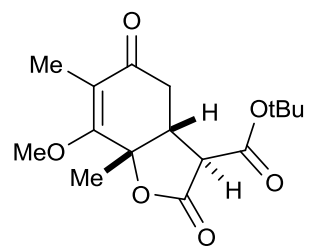

**9j**  
(300 MHz, CDCl<sub>3</sub>)

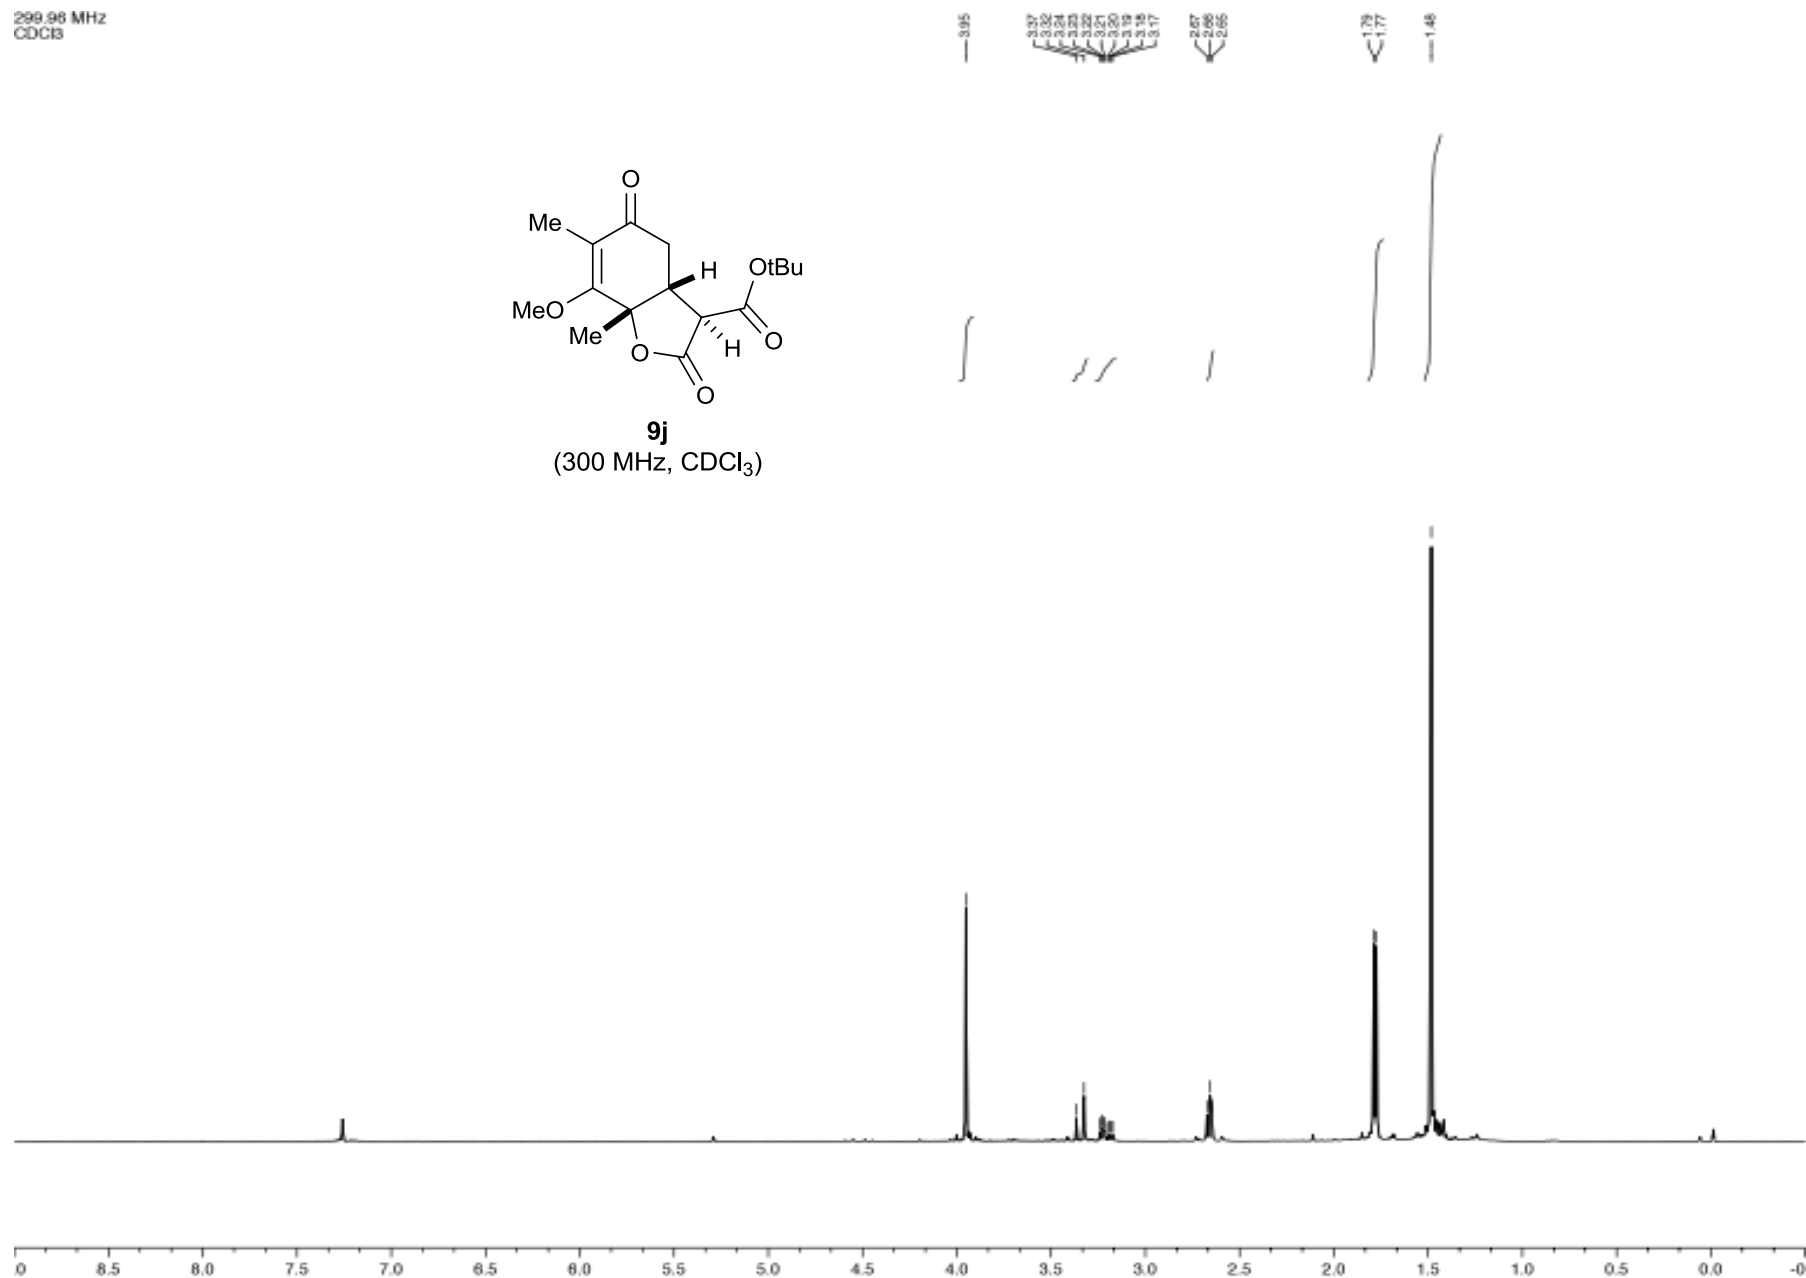



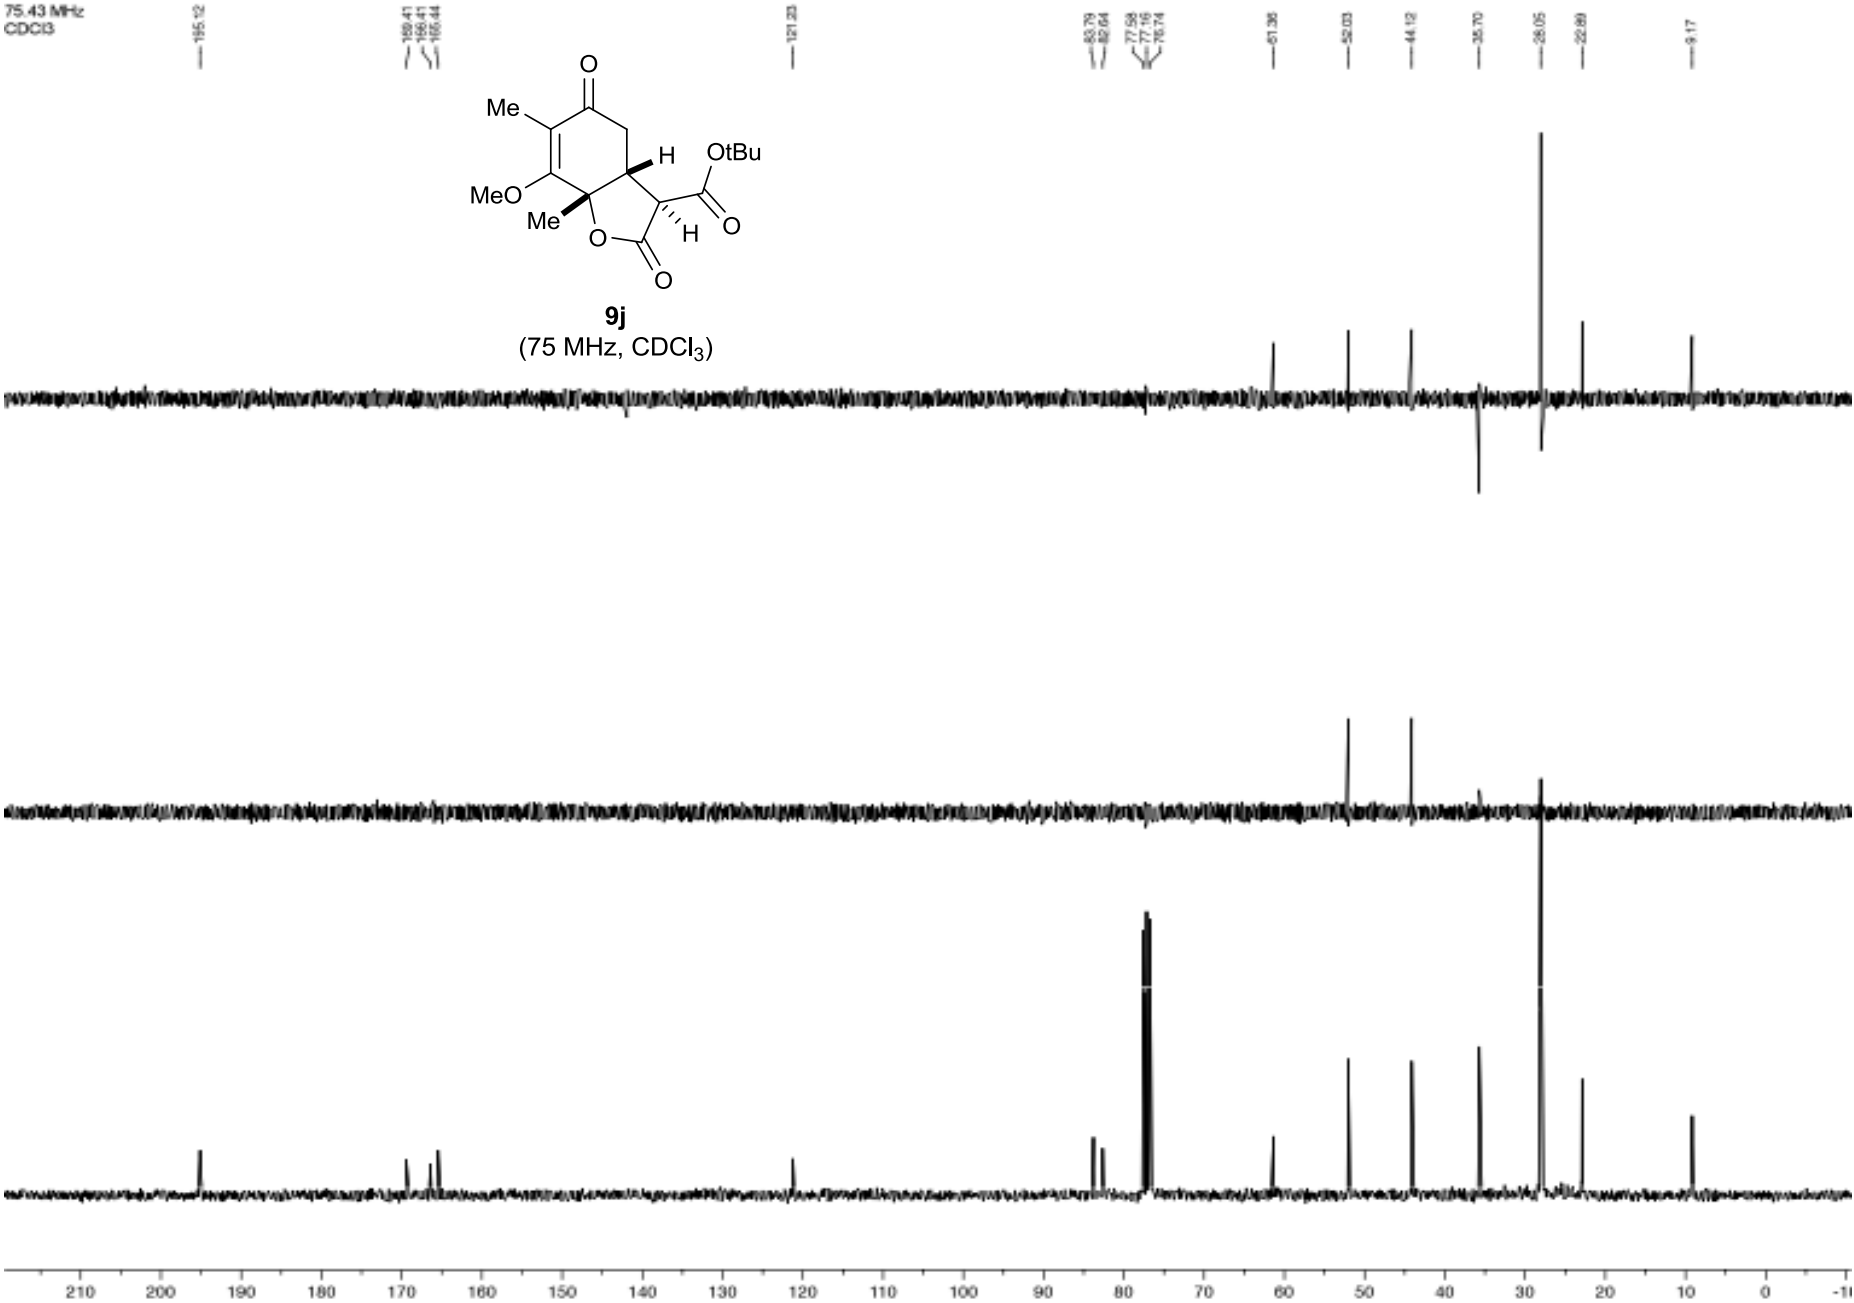

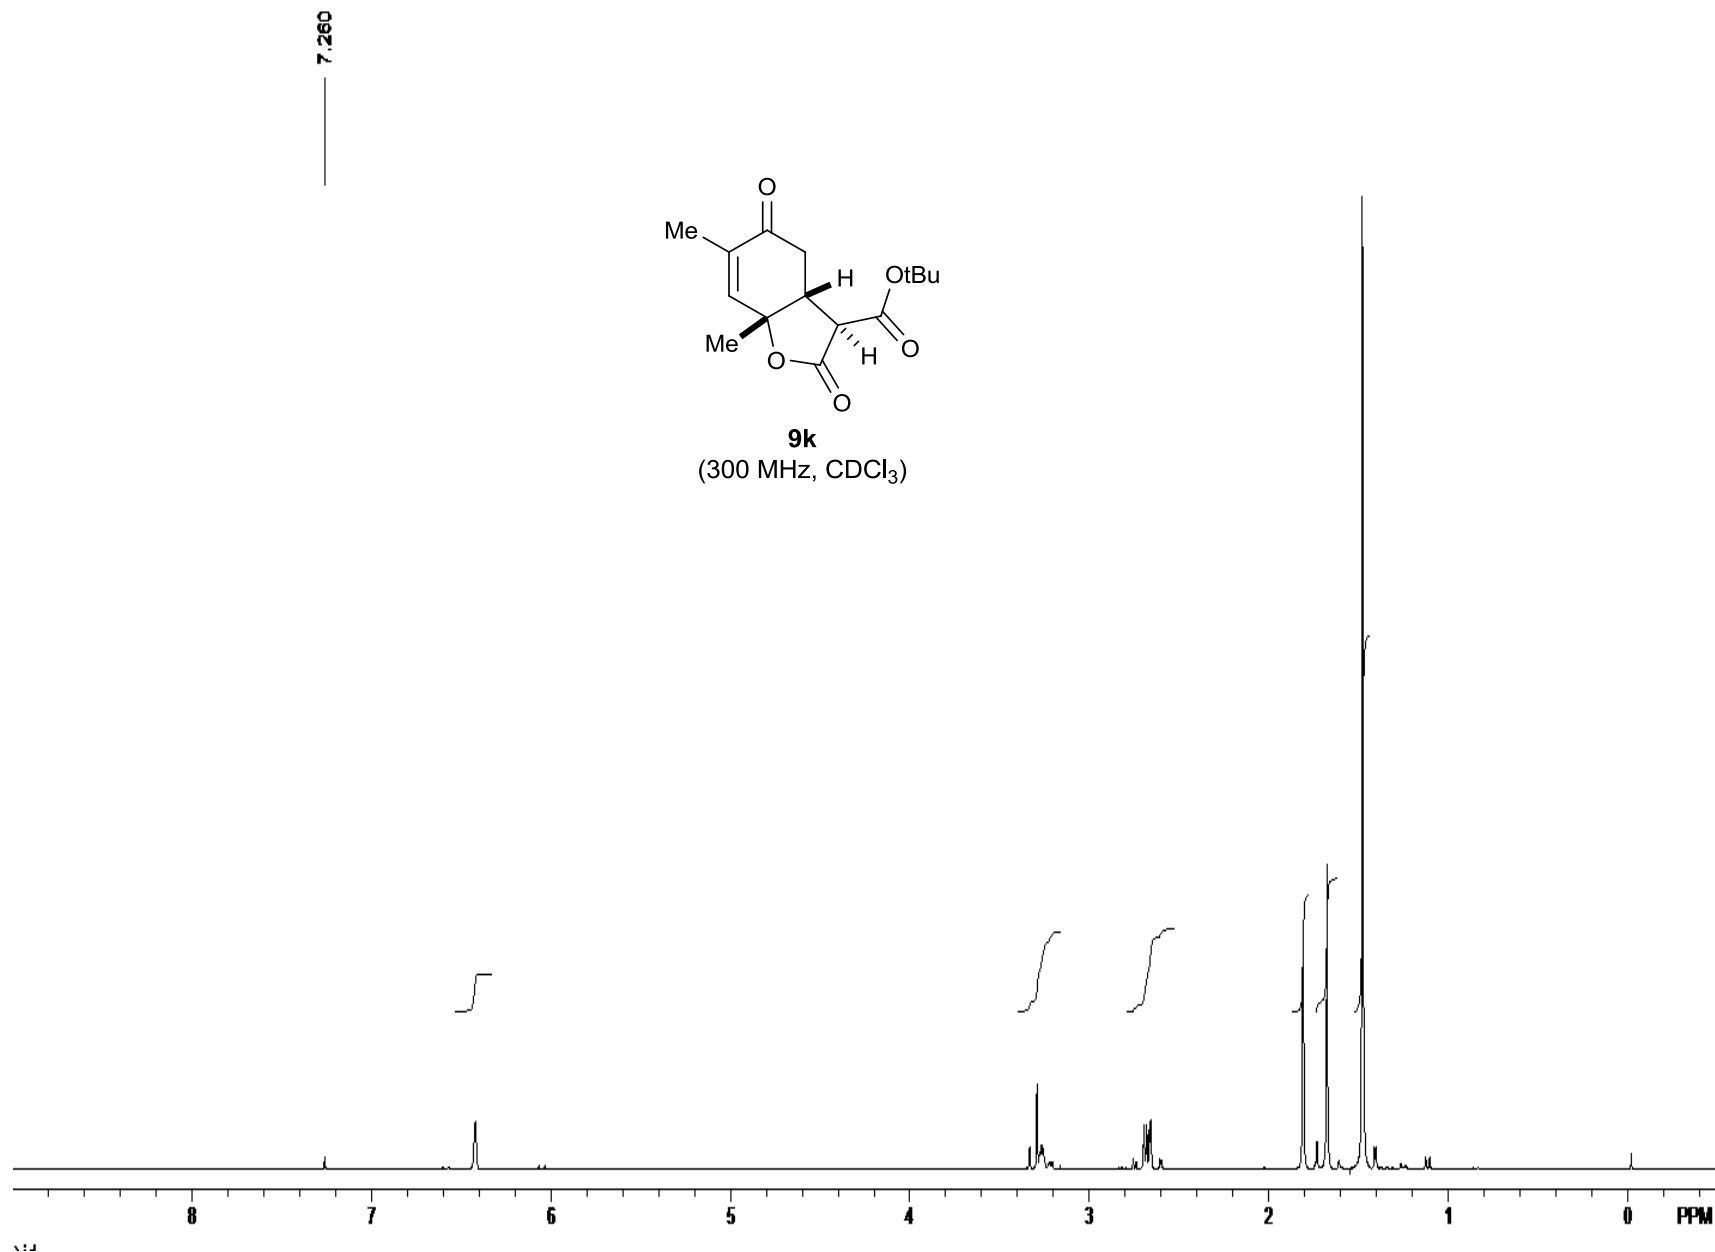

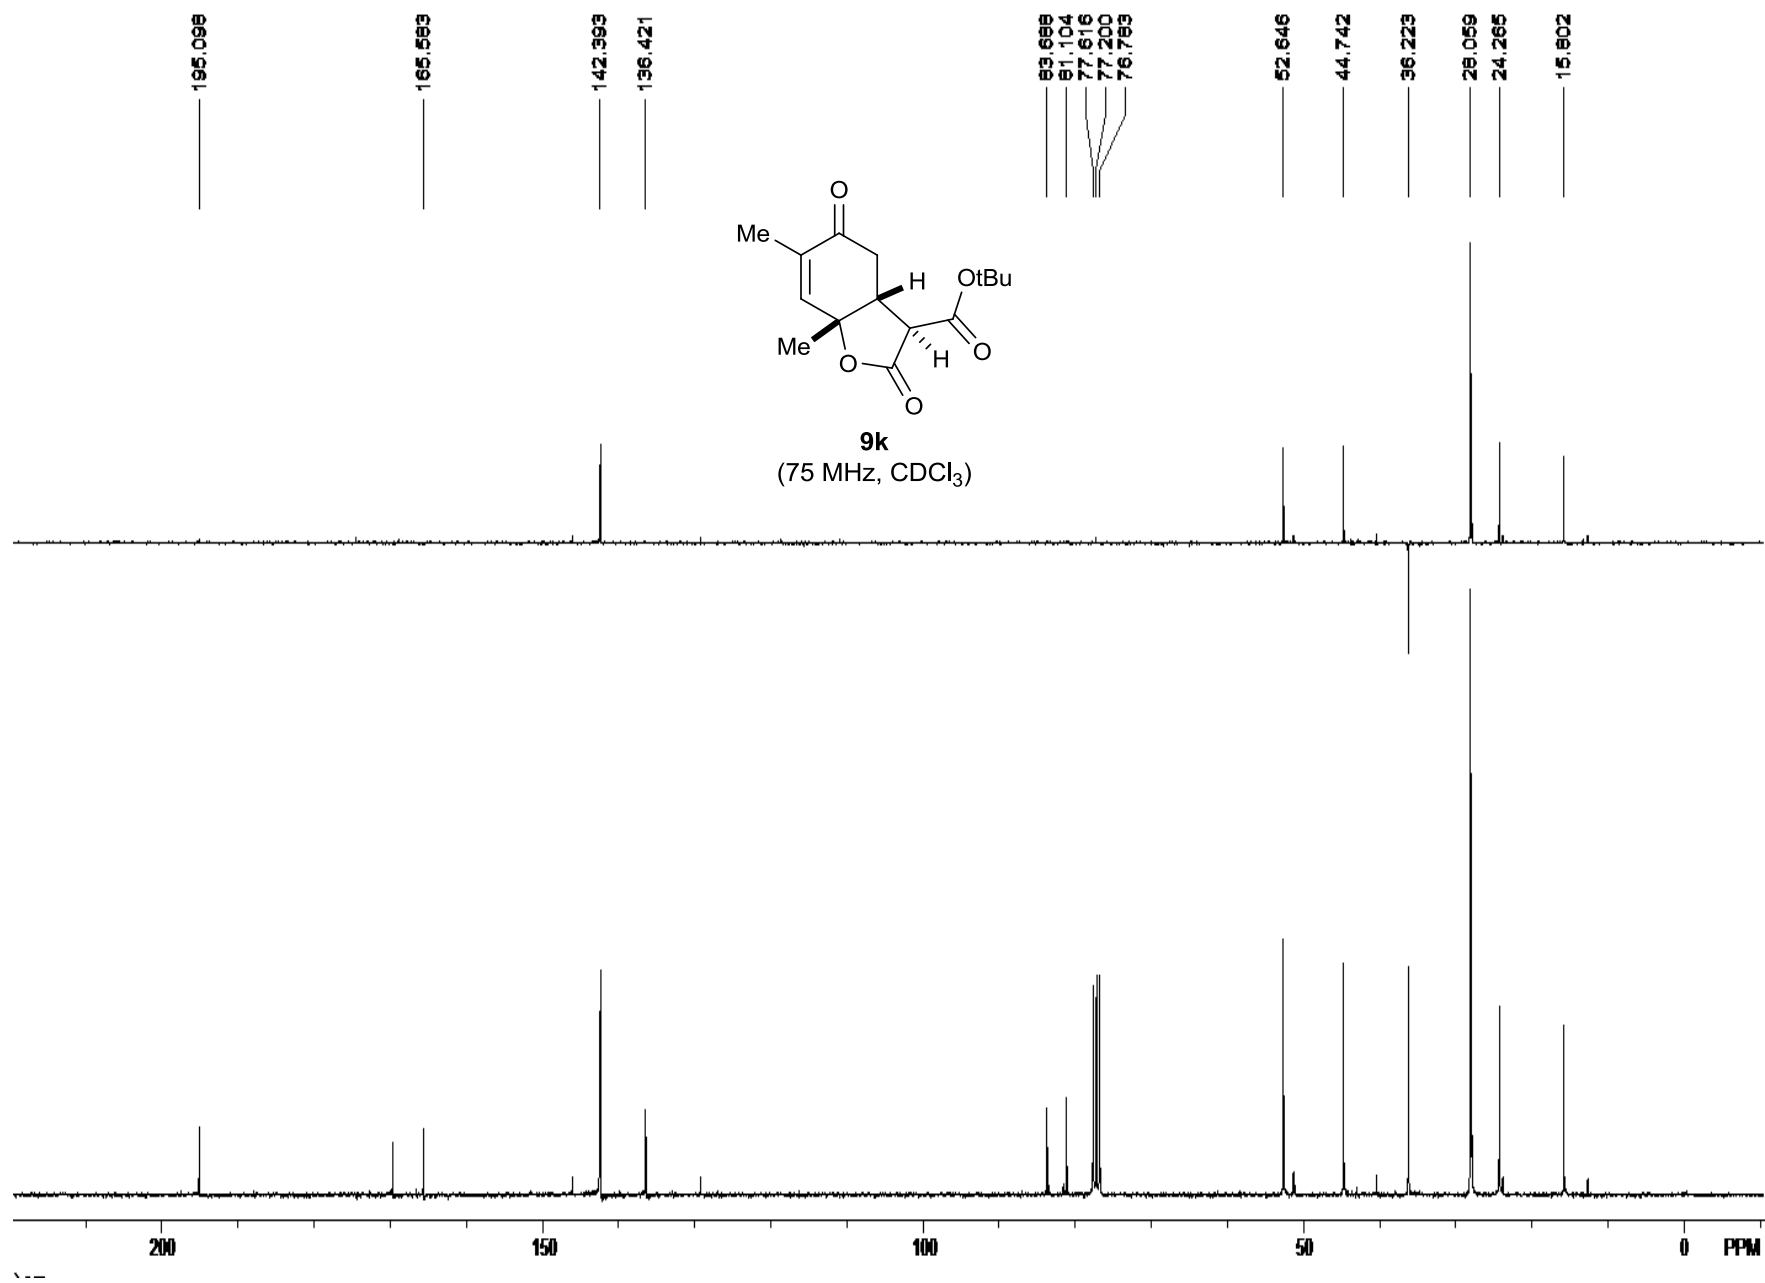

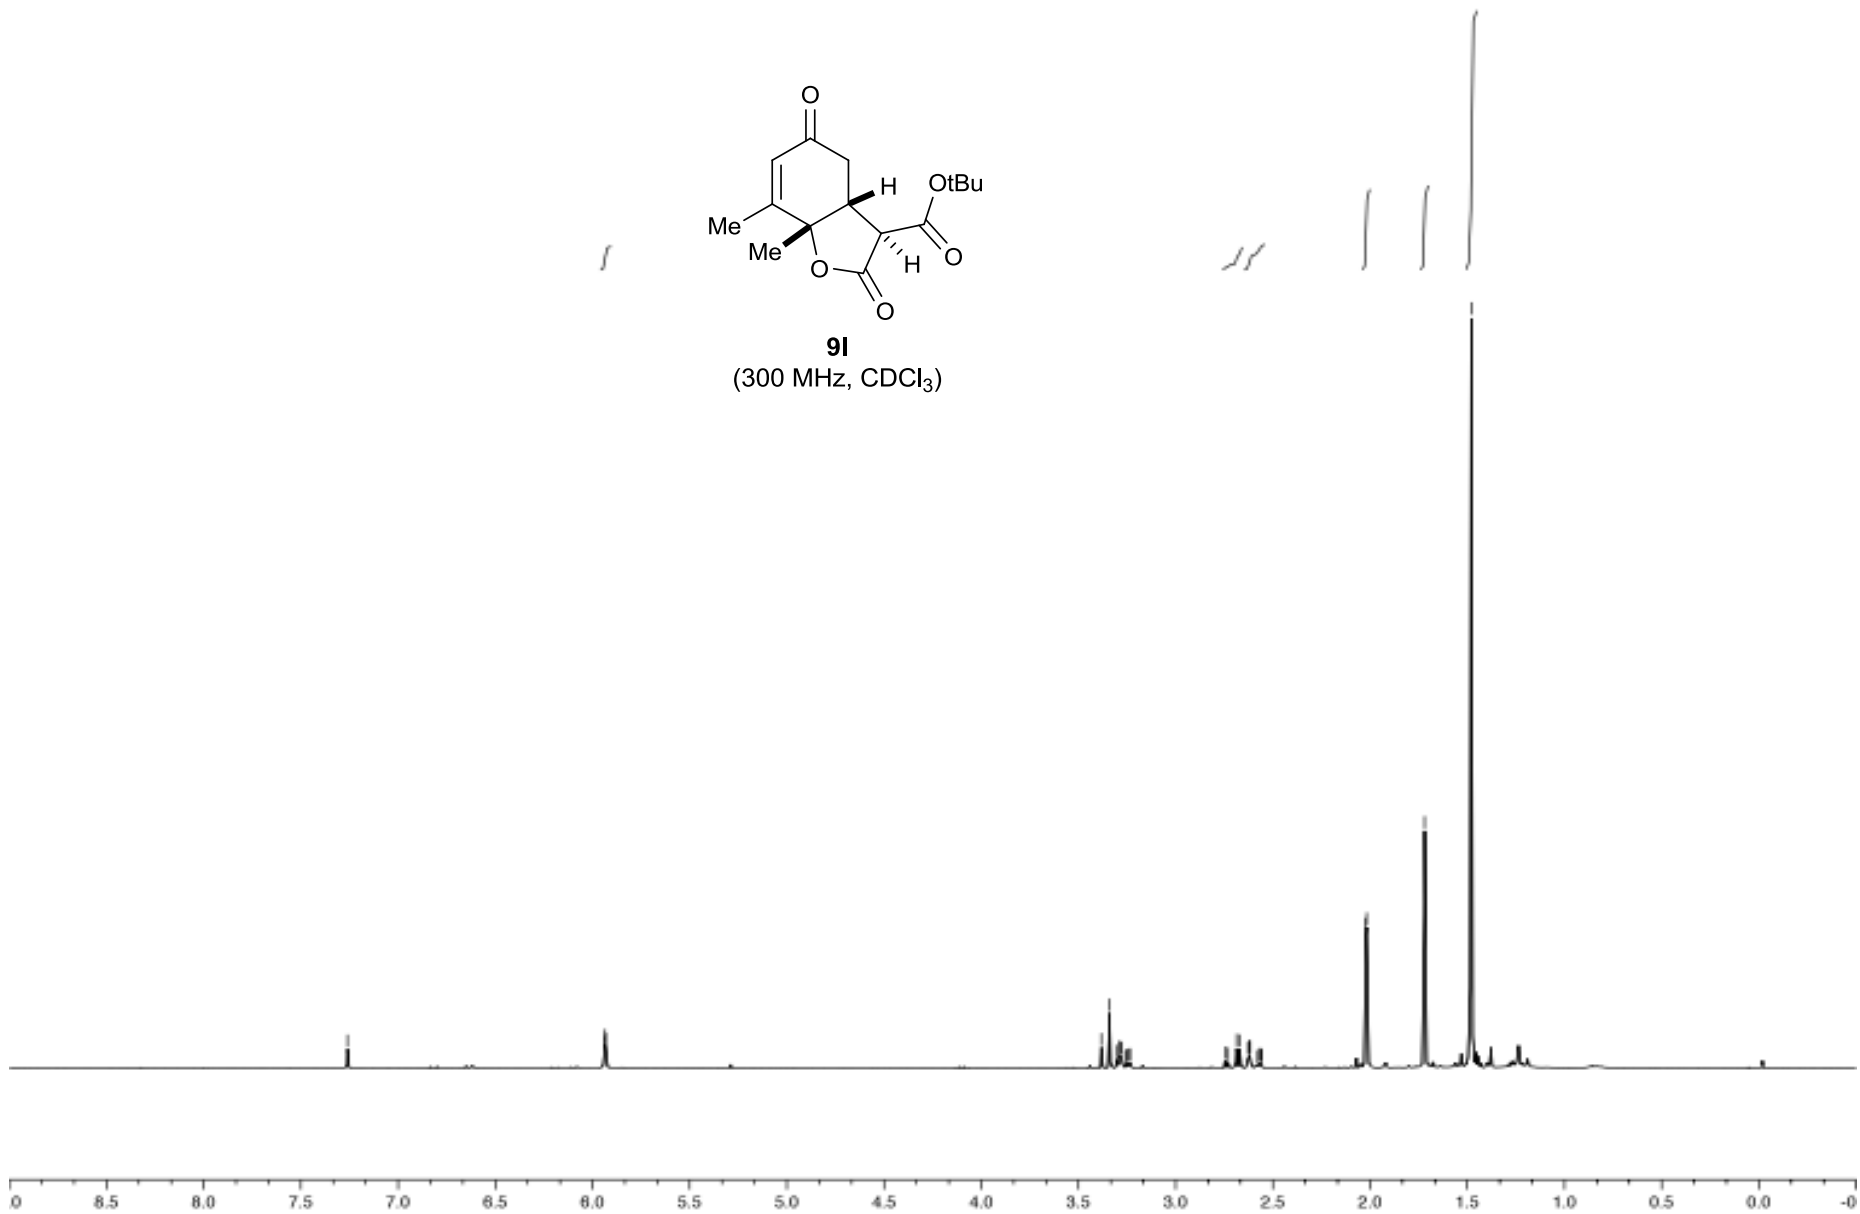

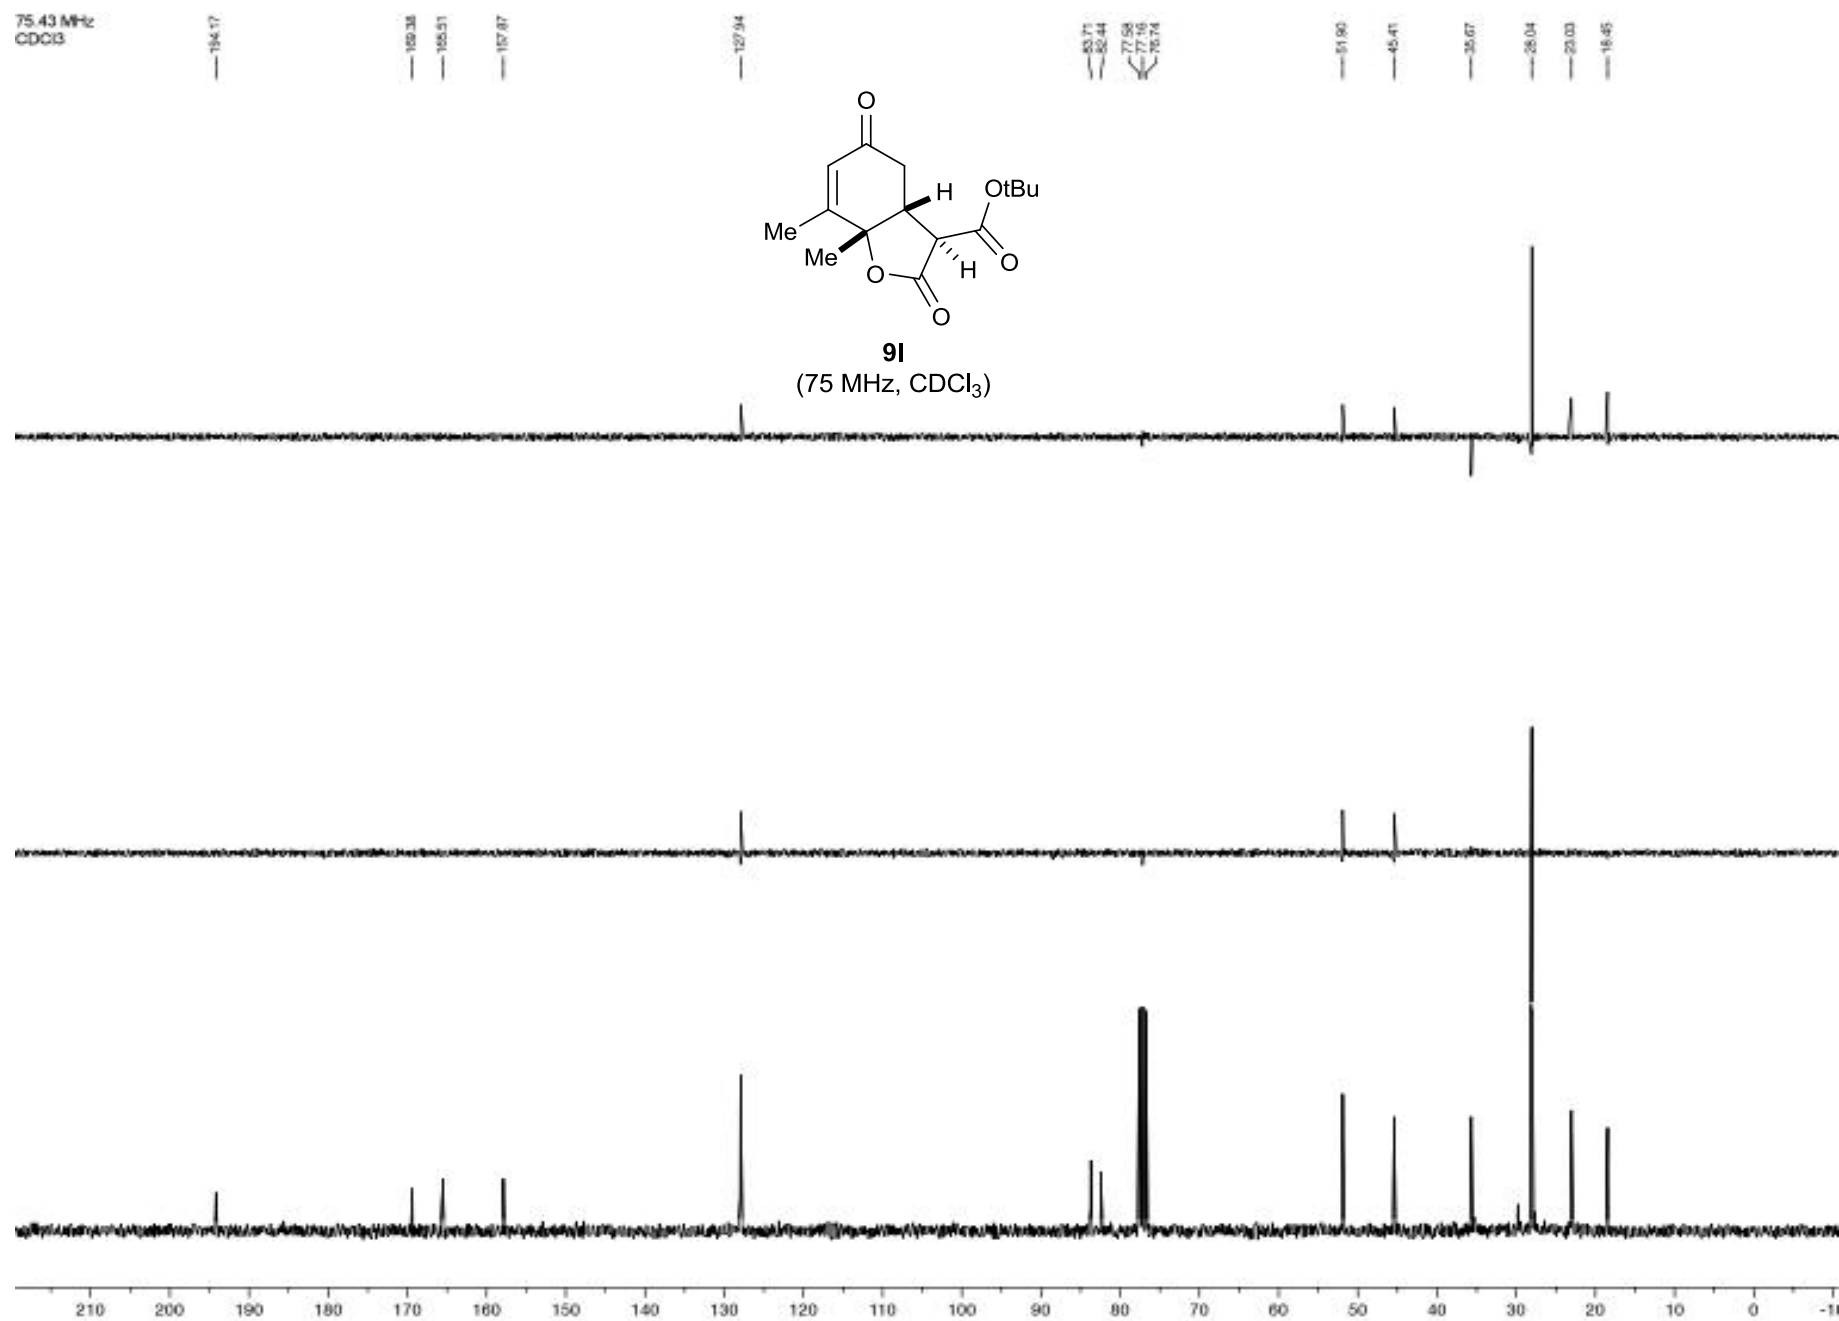

7.260

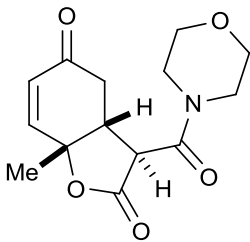

**10**  
(300 MHz, CDCl<sub>3</sub>)

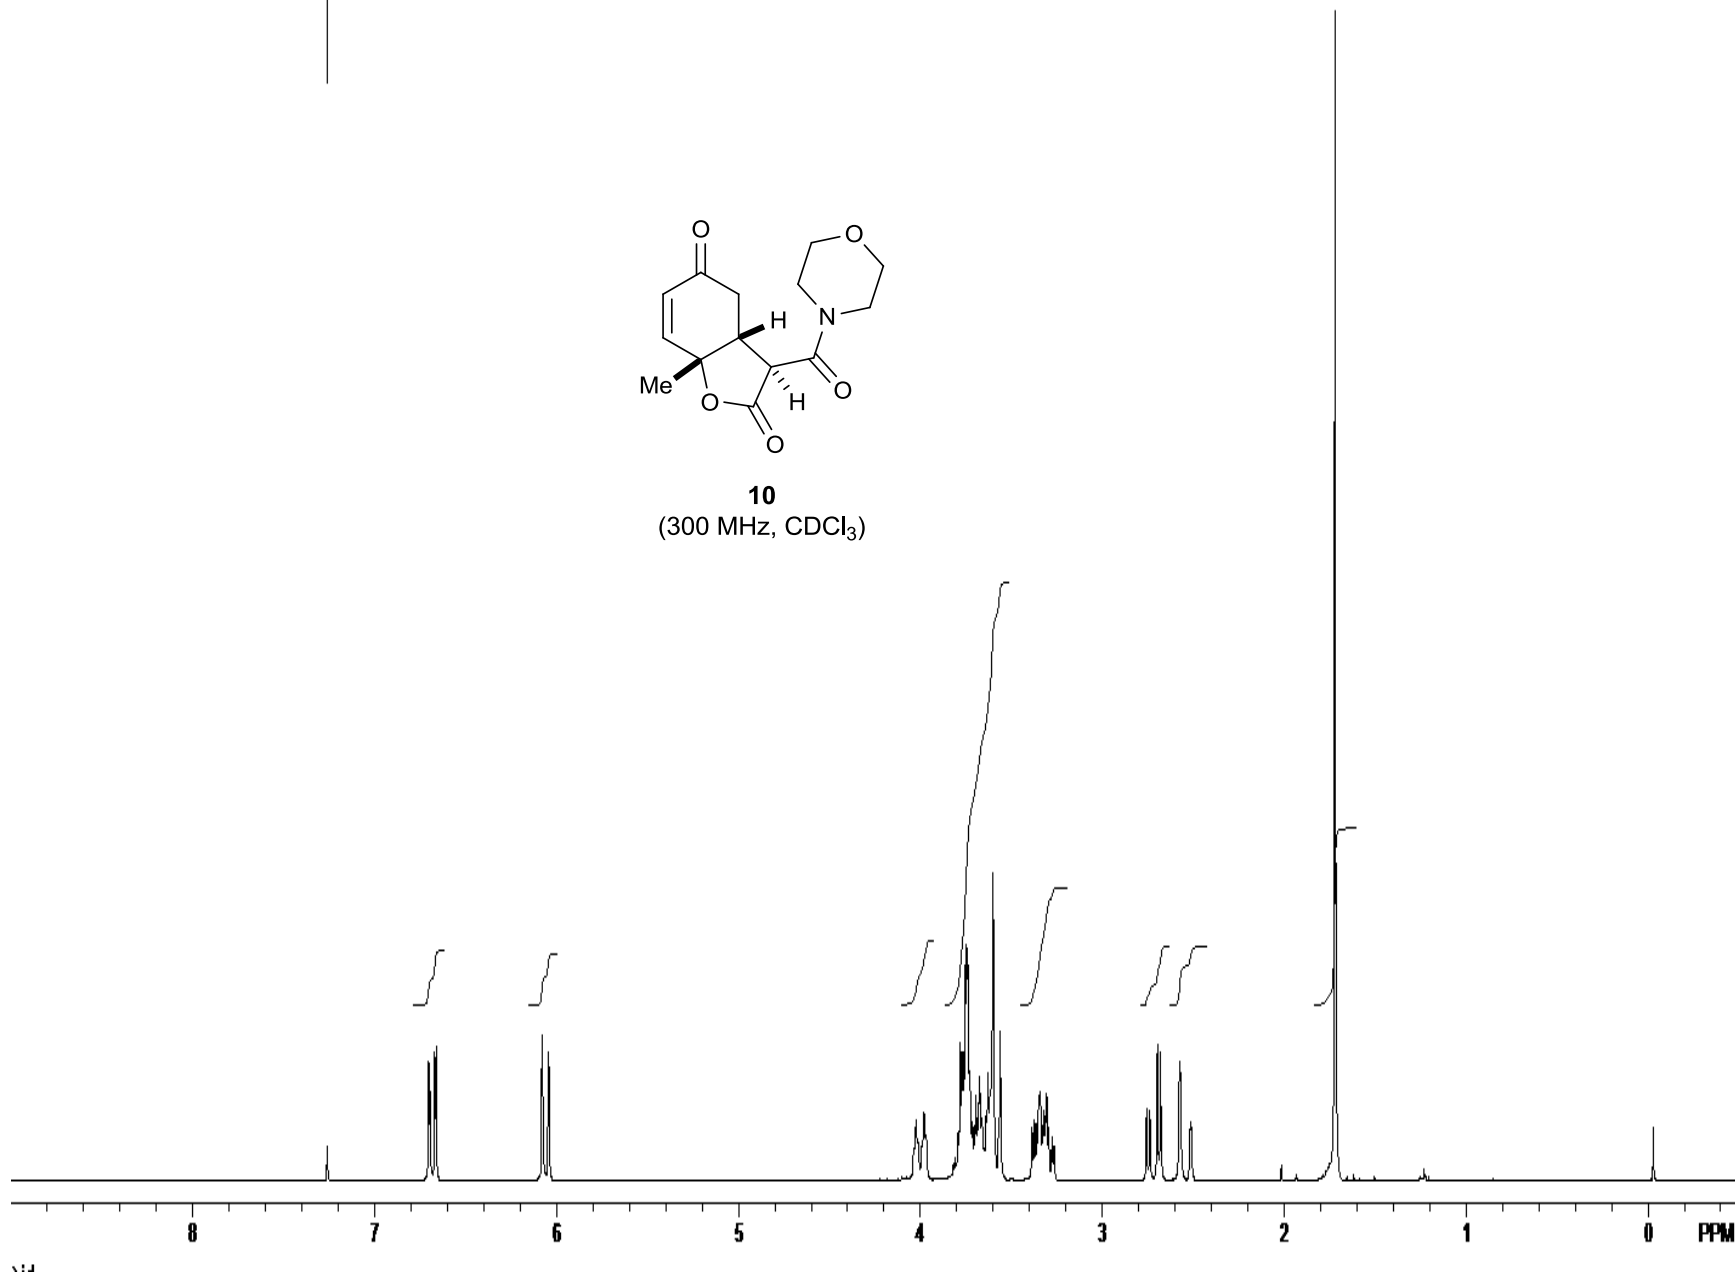

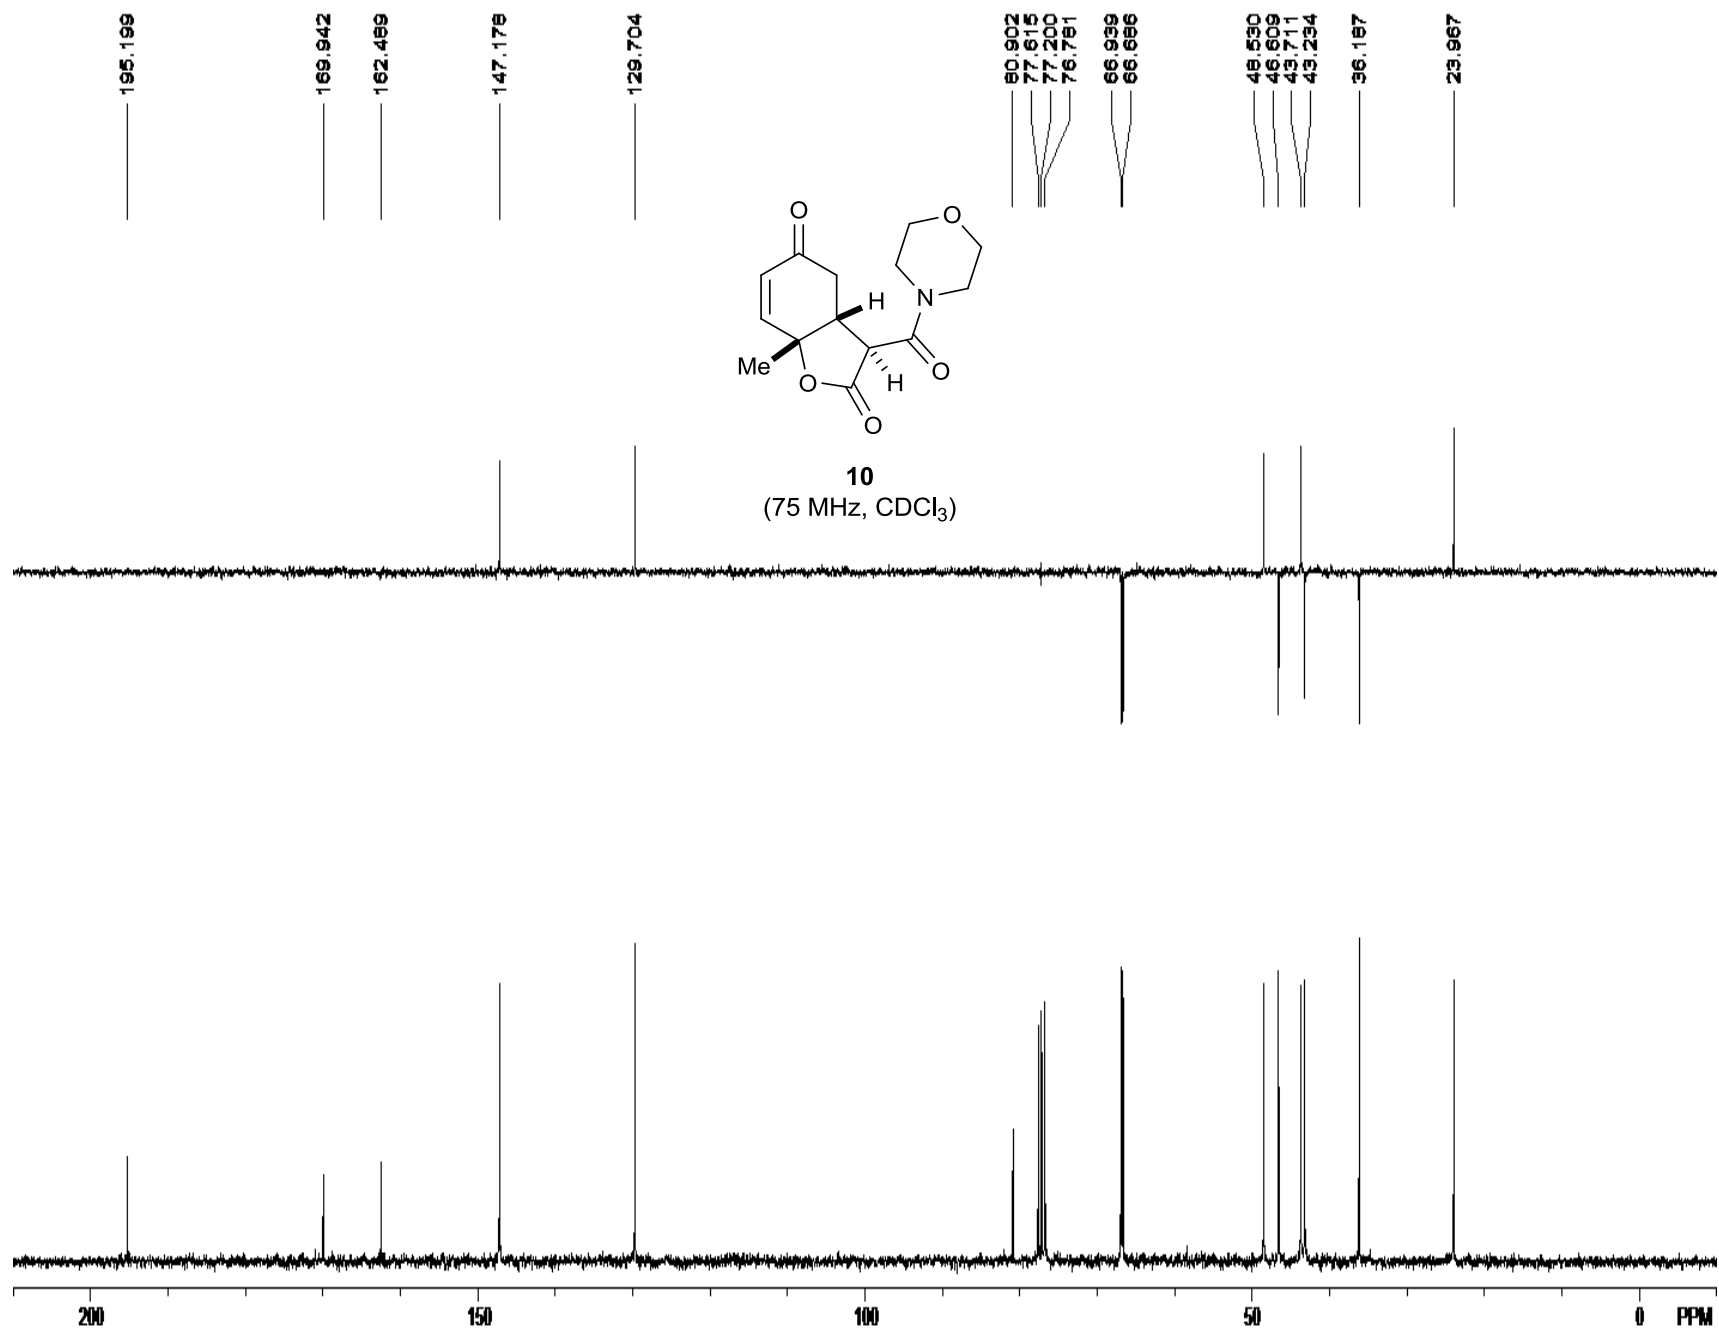

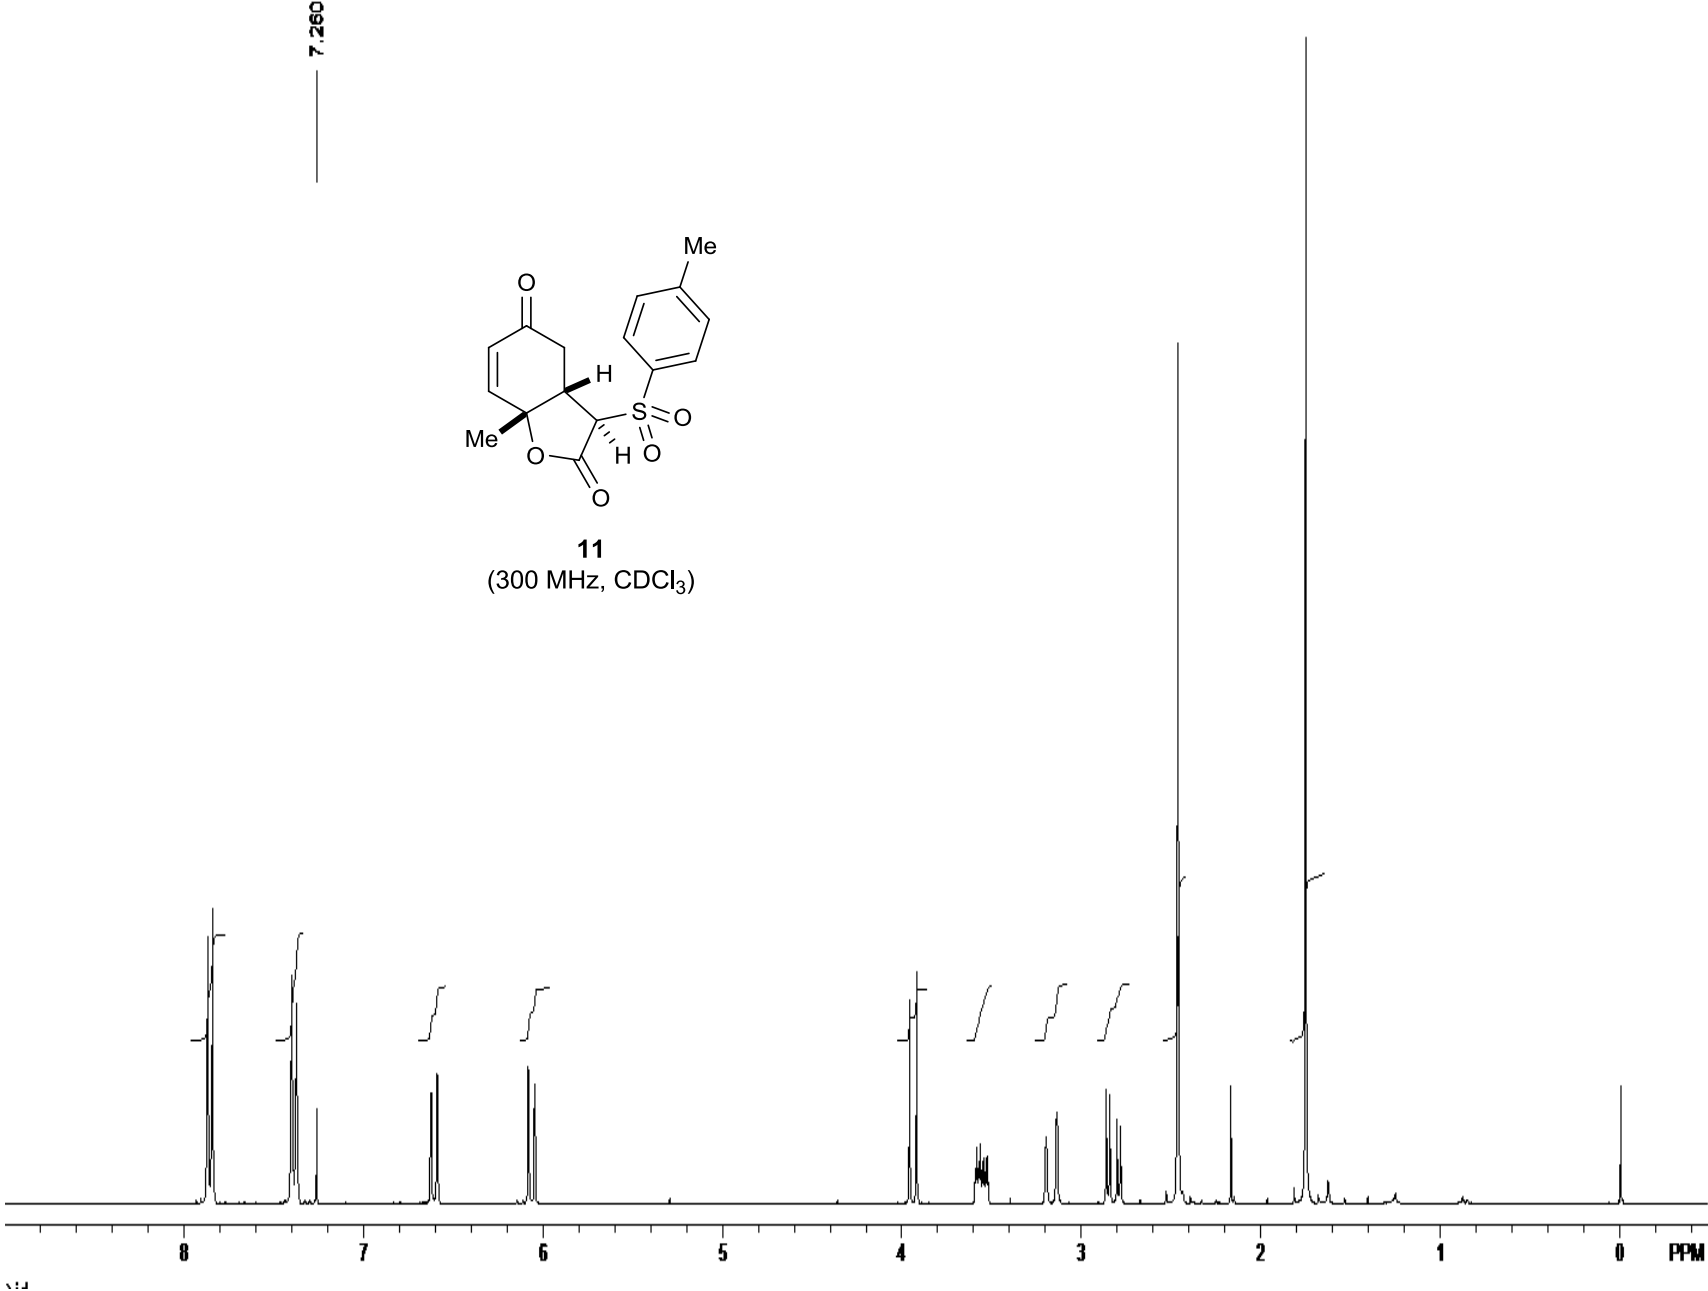



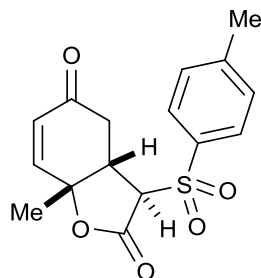

**11**  
(75 MHz, CDCl<sub>3</sub>)

300.17 MHz  
cdcl3

7.26

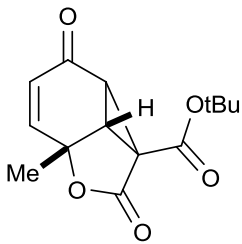

**12n**  
(300 MHz, CDCl<sub>3</sub>)

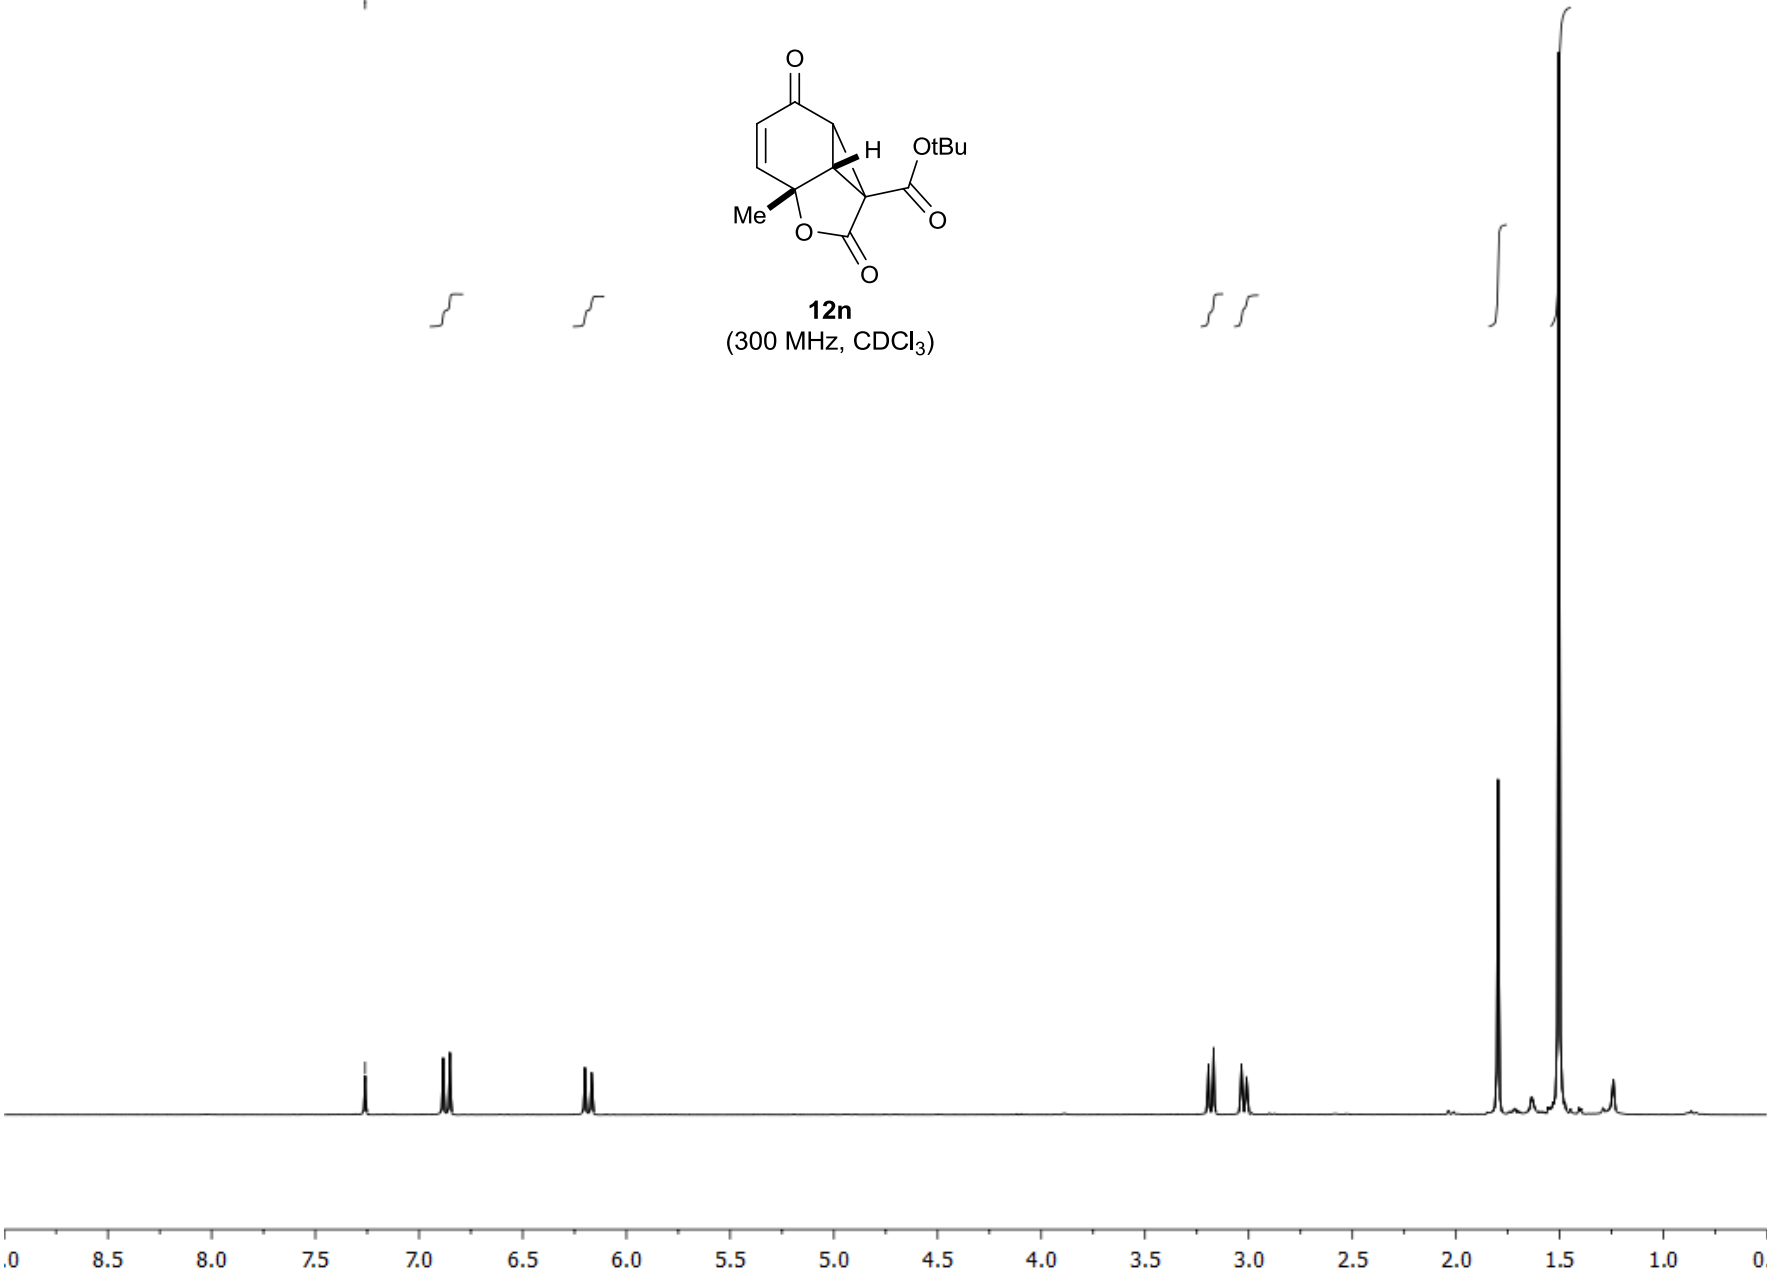

75.43 MHz  
CDCl<sub>3</sub>

188.04

165.70  
163.58

149.19

131.63

84.45

77.58

77.16

76.74

74.16

44.31

42.22

35.59

28.01

25.63

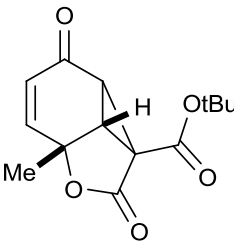

**12n**  
(75 MHz, CDCl<sub>3</sub>)

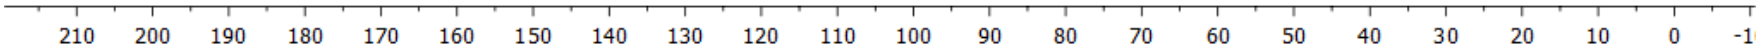

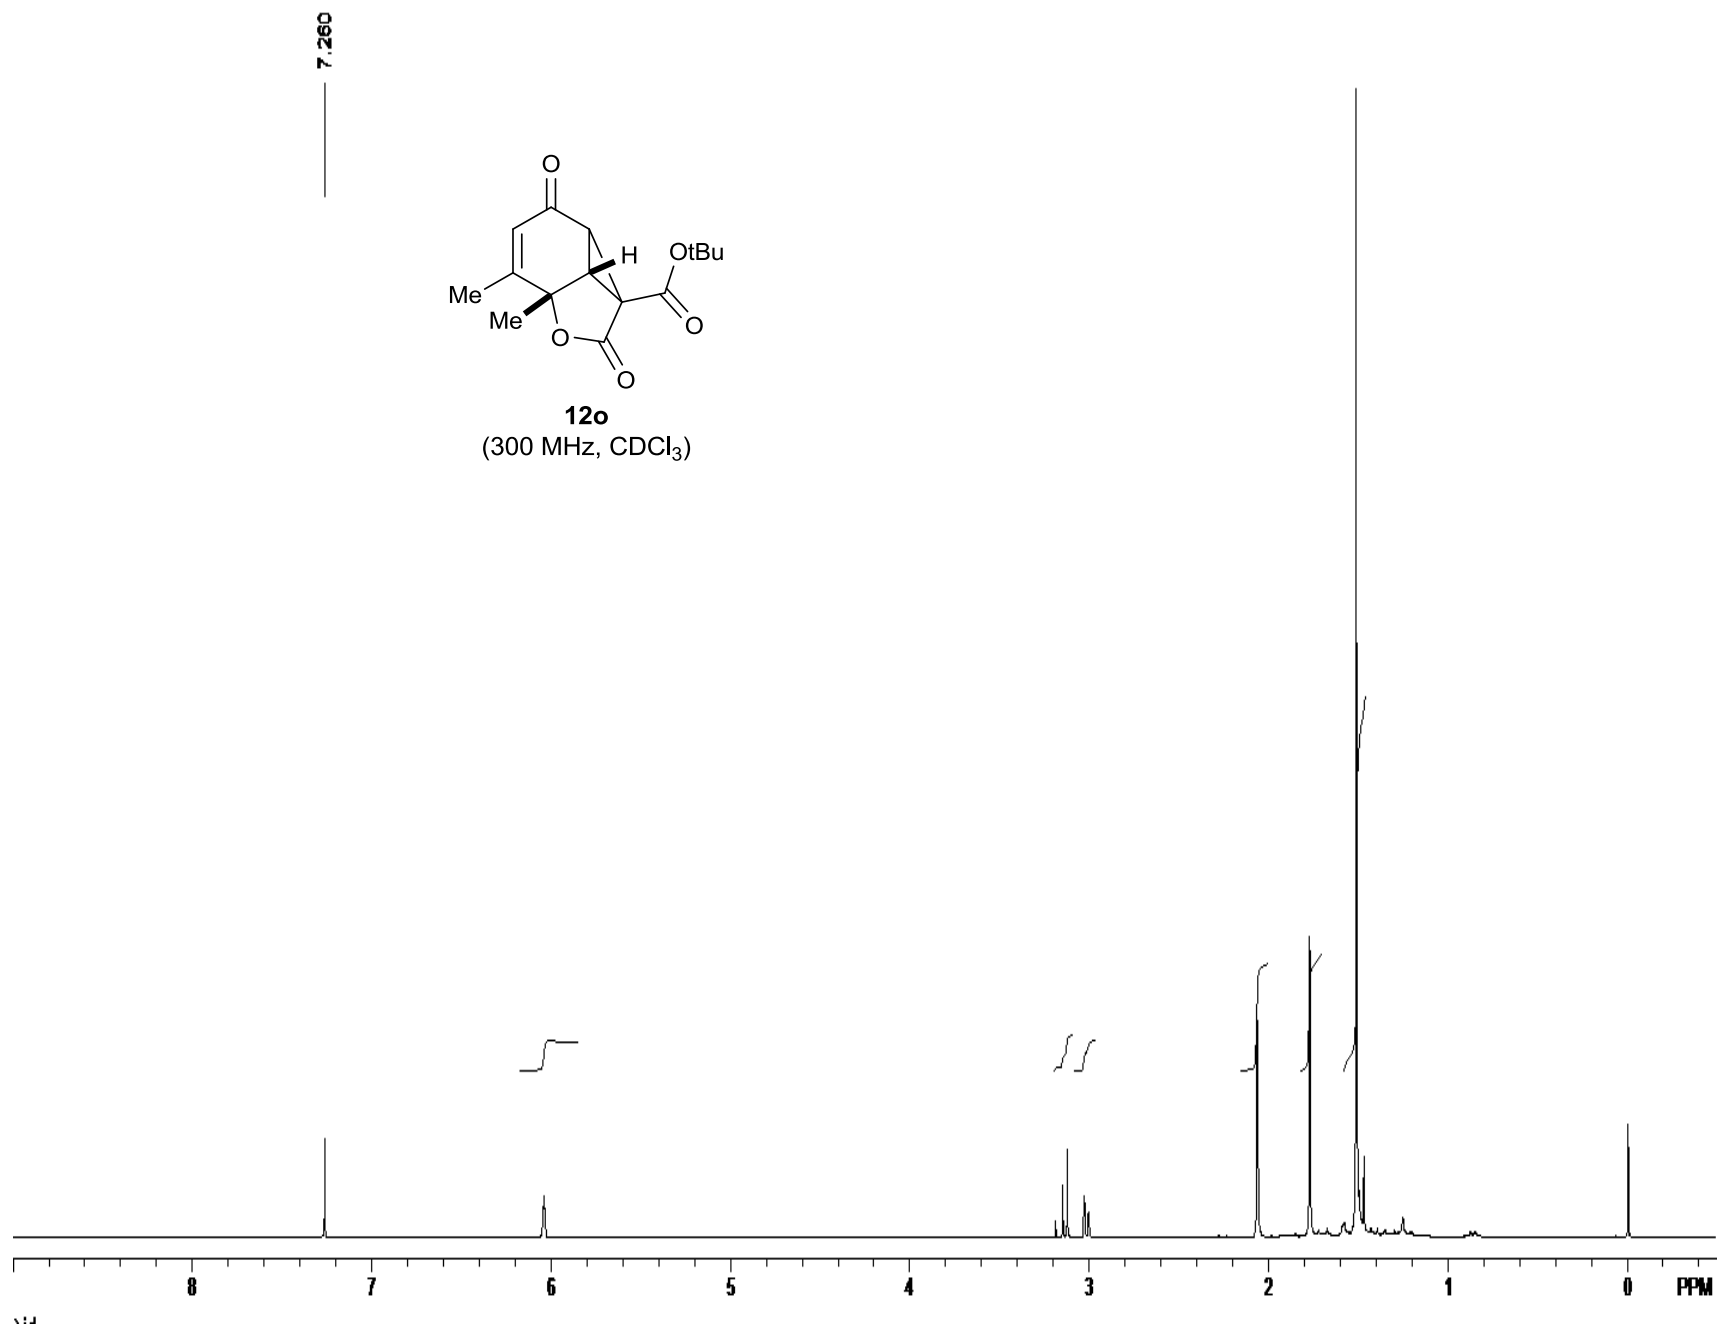

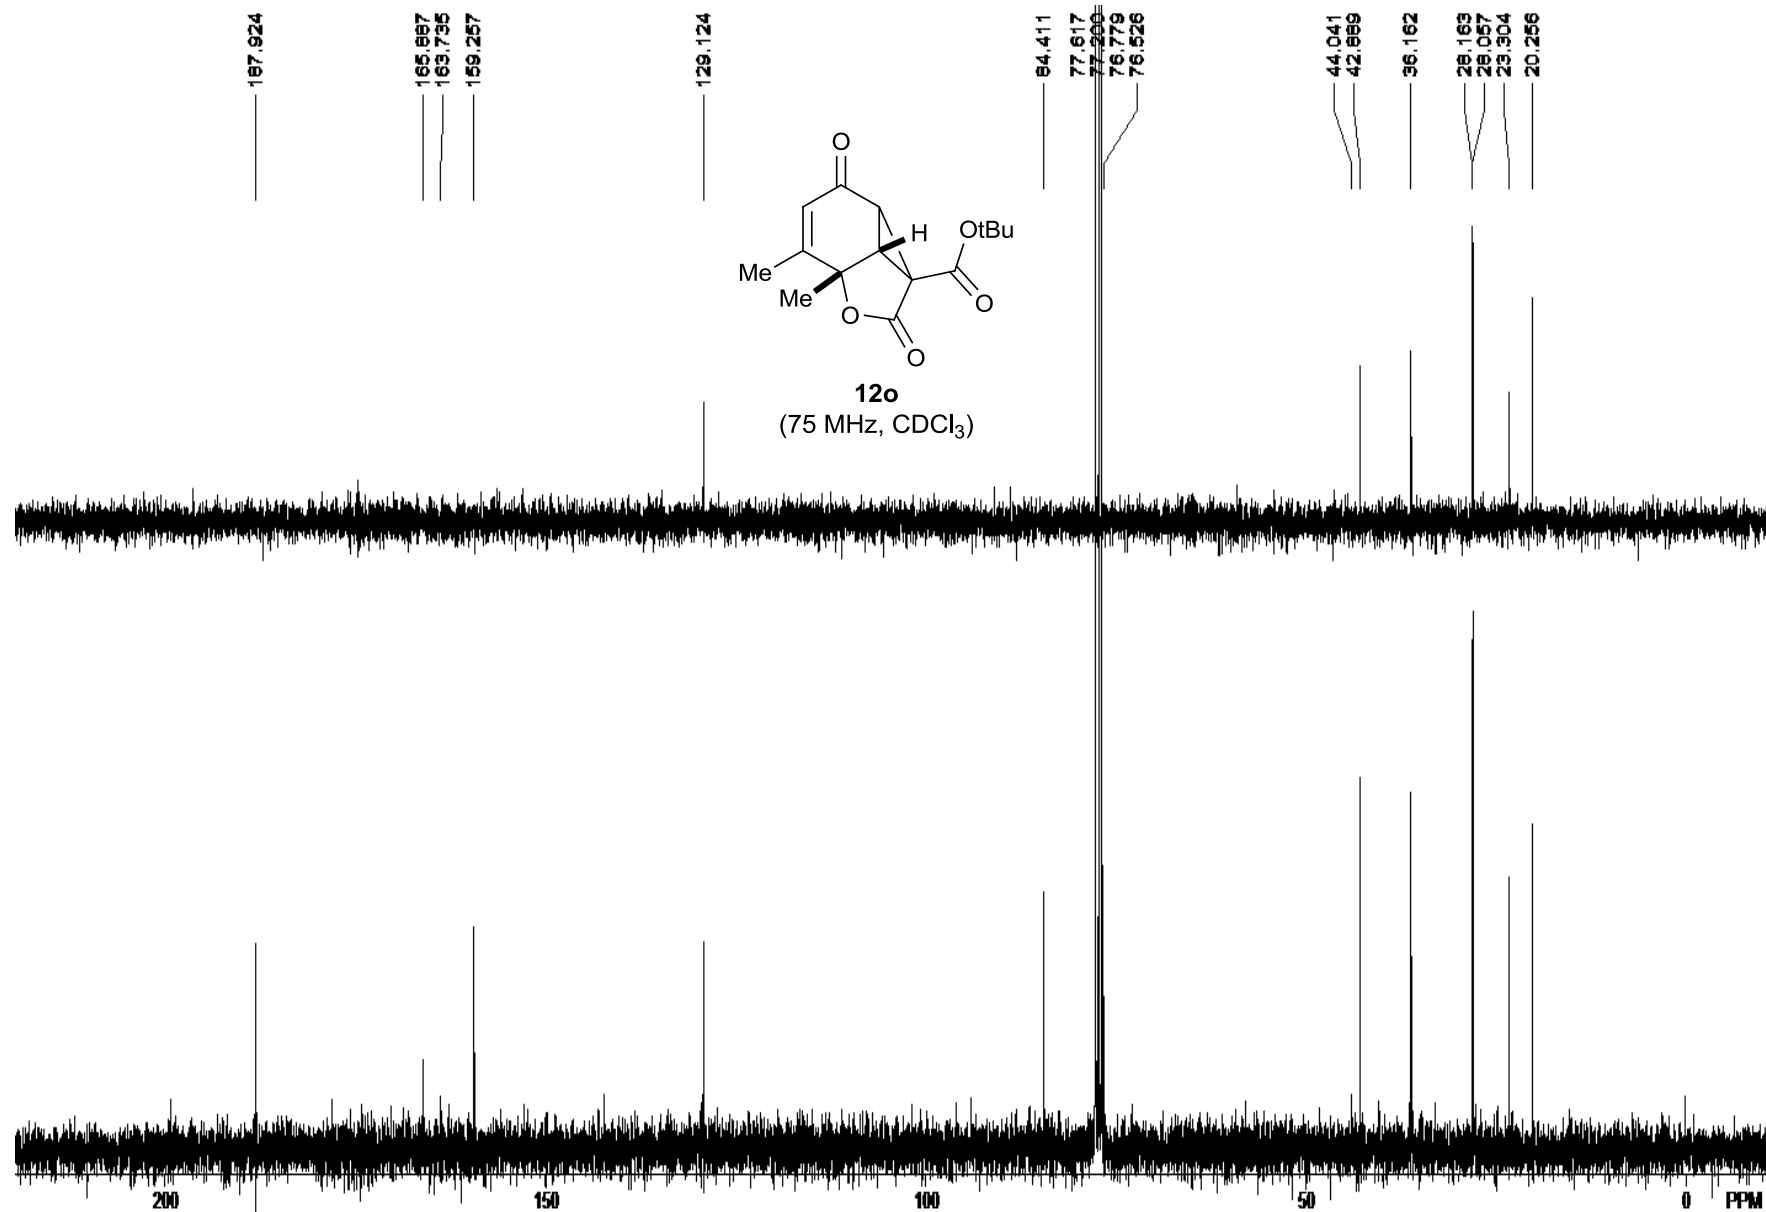

299.96 MHz  
CDCl<sub>3</sub>

7.26

3.90

2.98  
2.96  
2.94  
2.92  
2.90

1.86

1.71

1.49

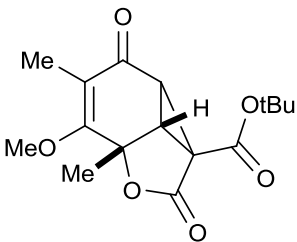

**12p**  
(300 MHz, CDCl<sub>3</sub>)

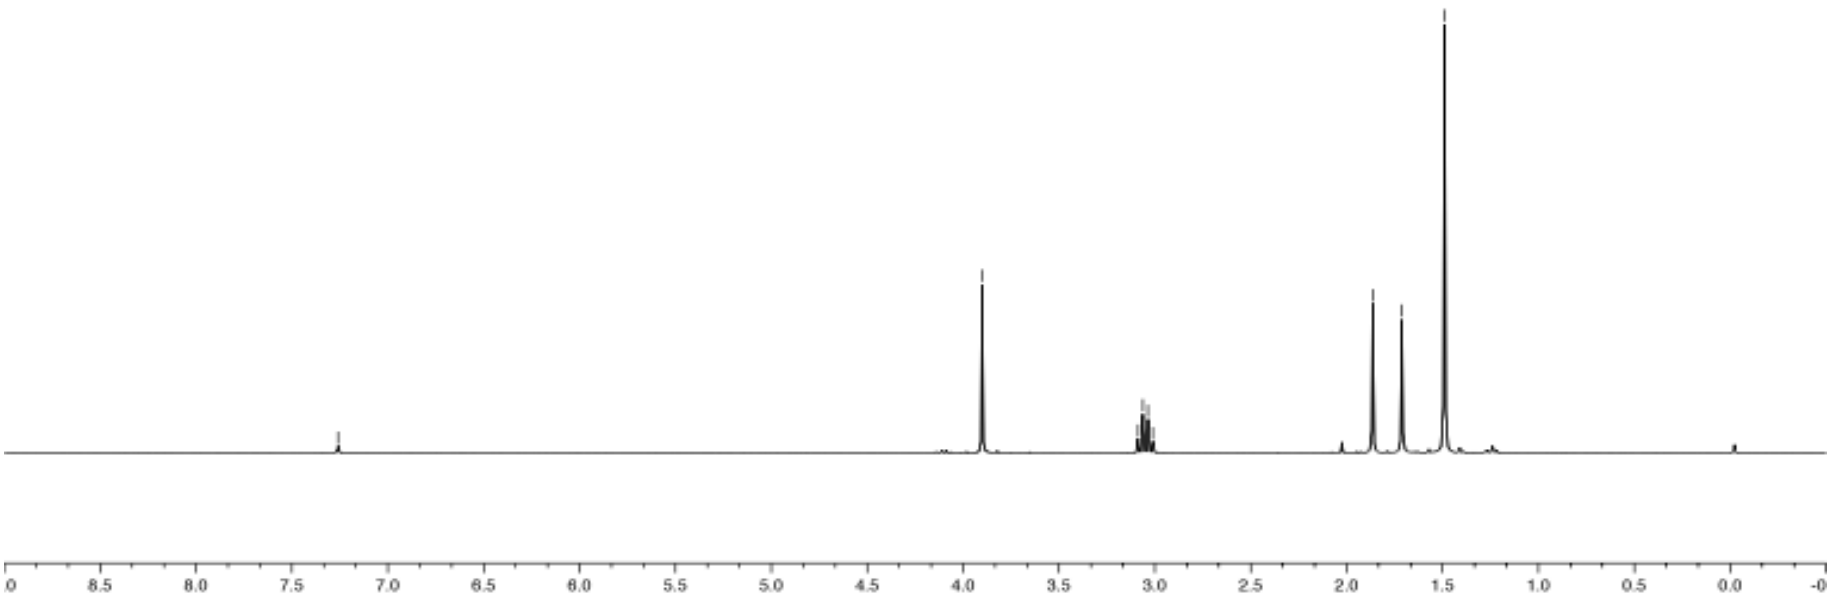

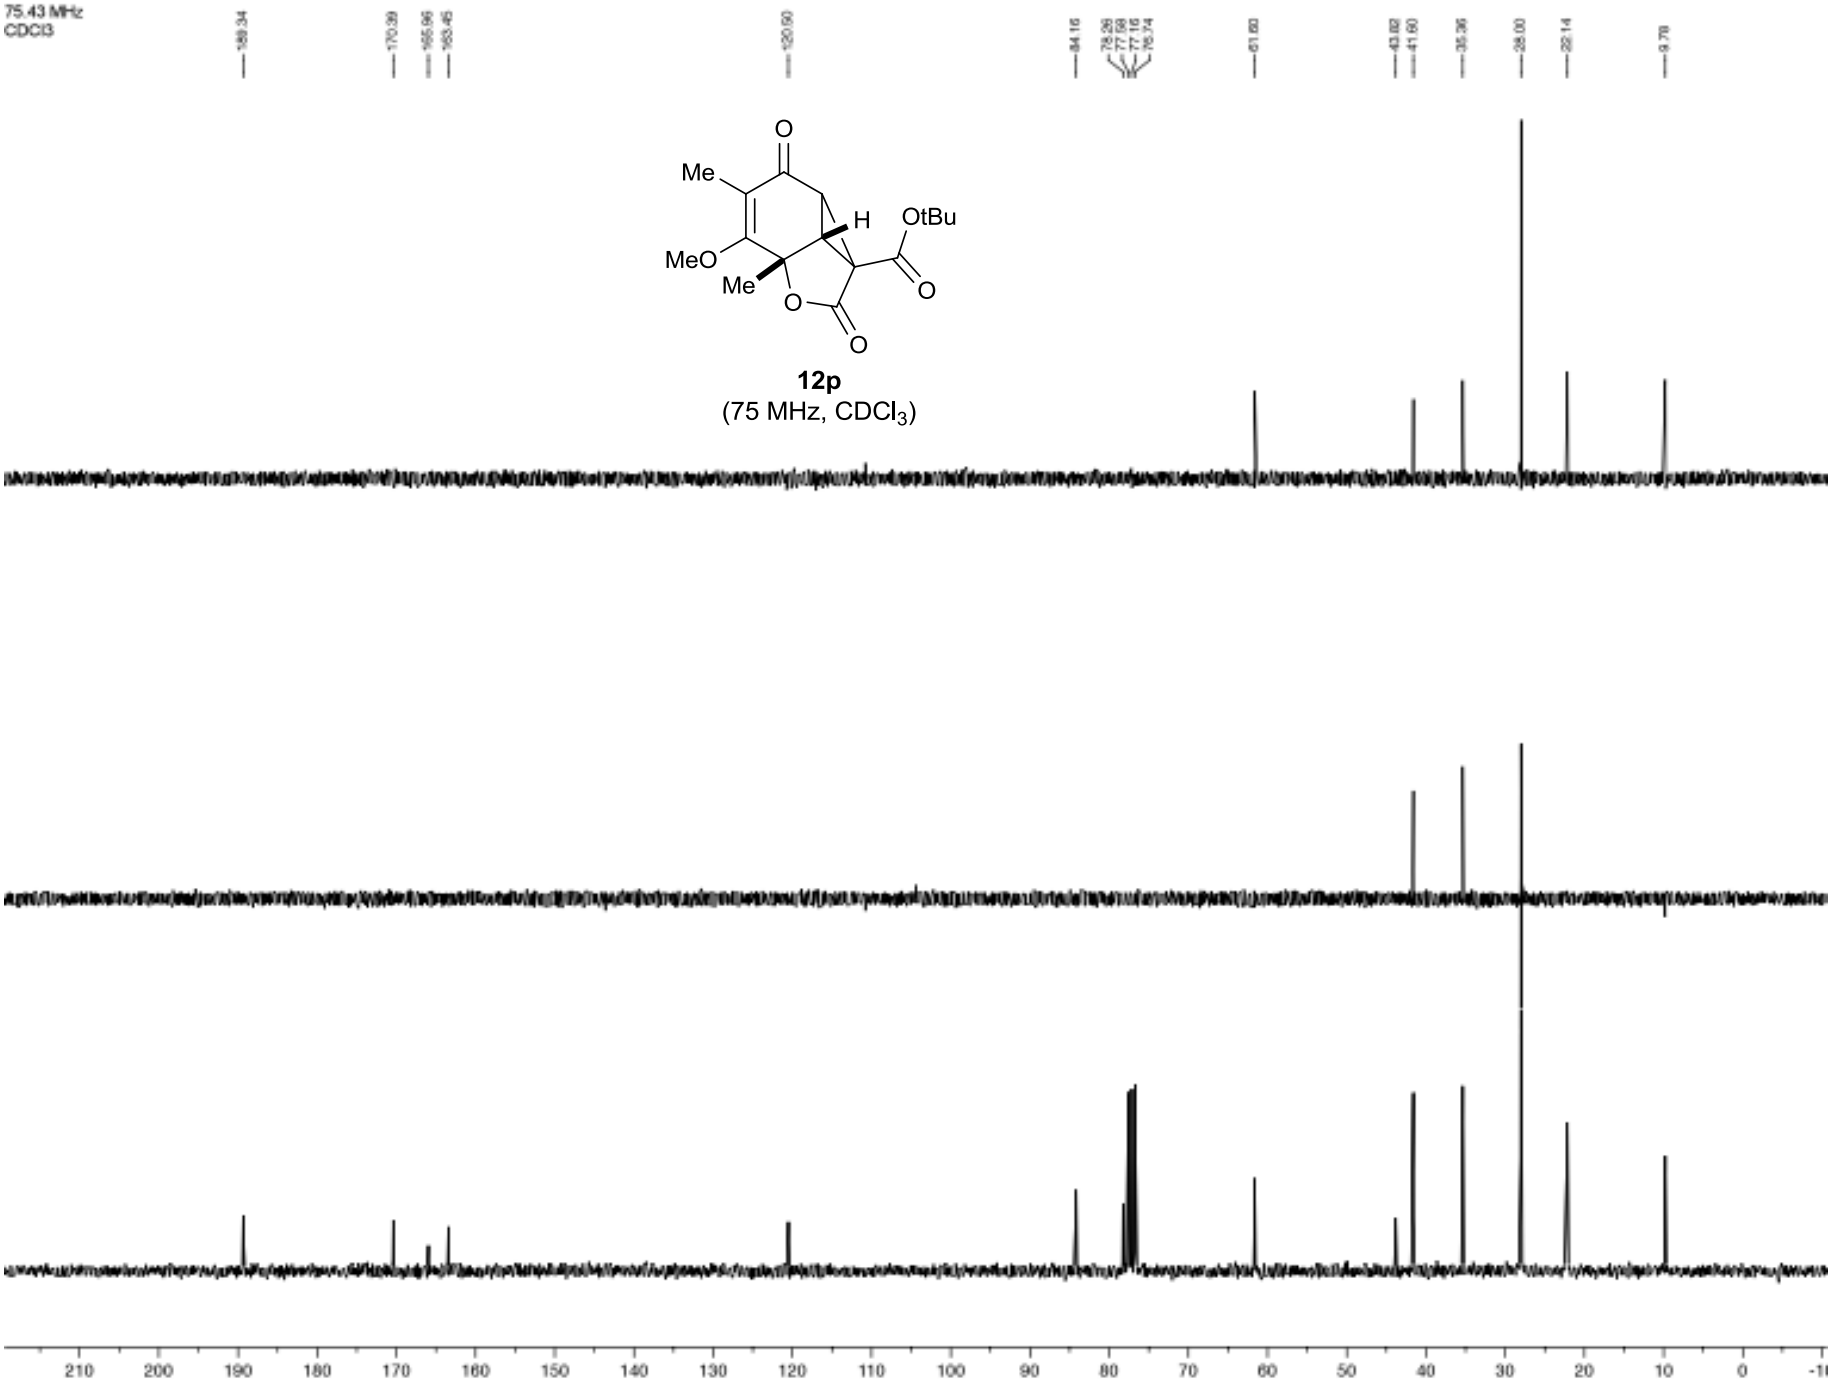

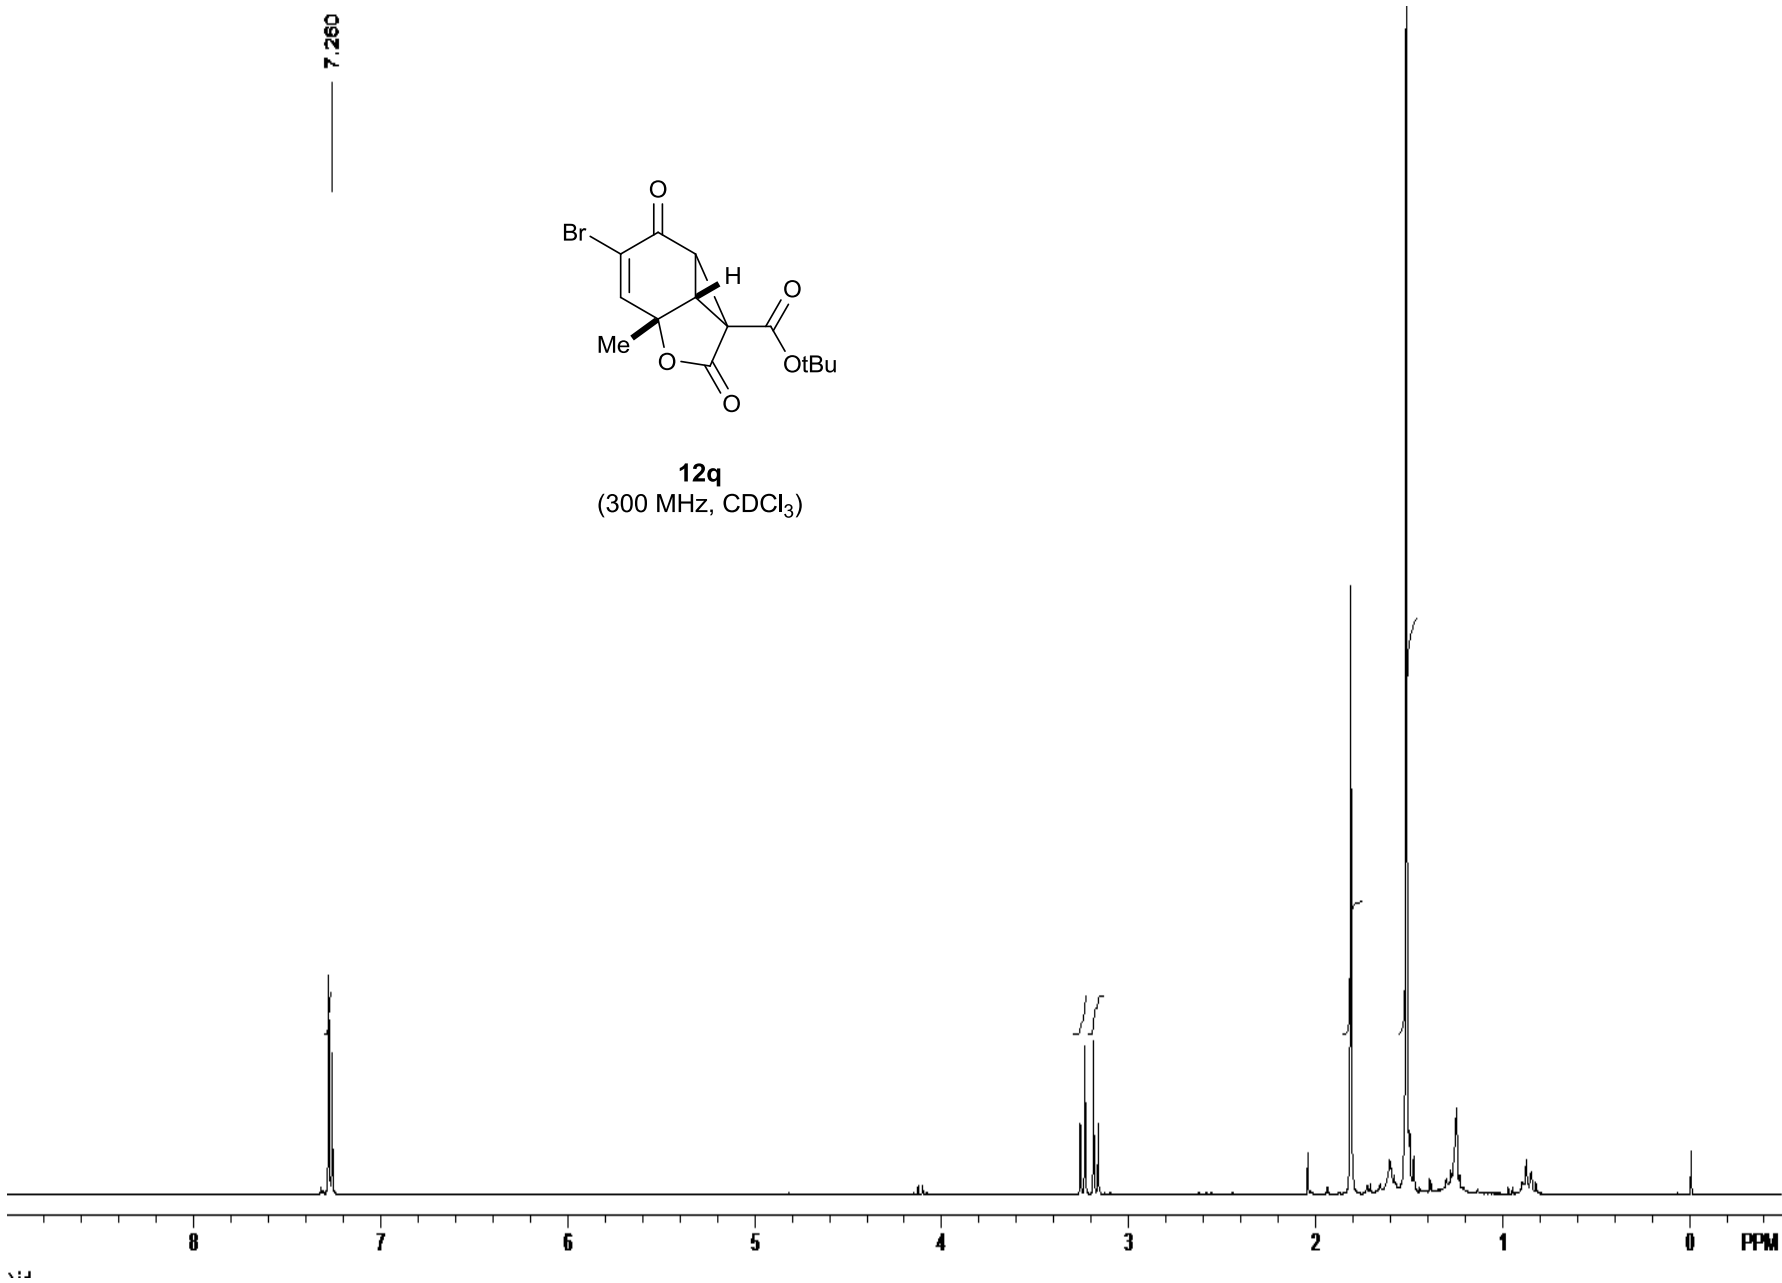



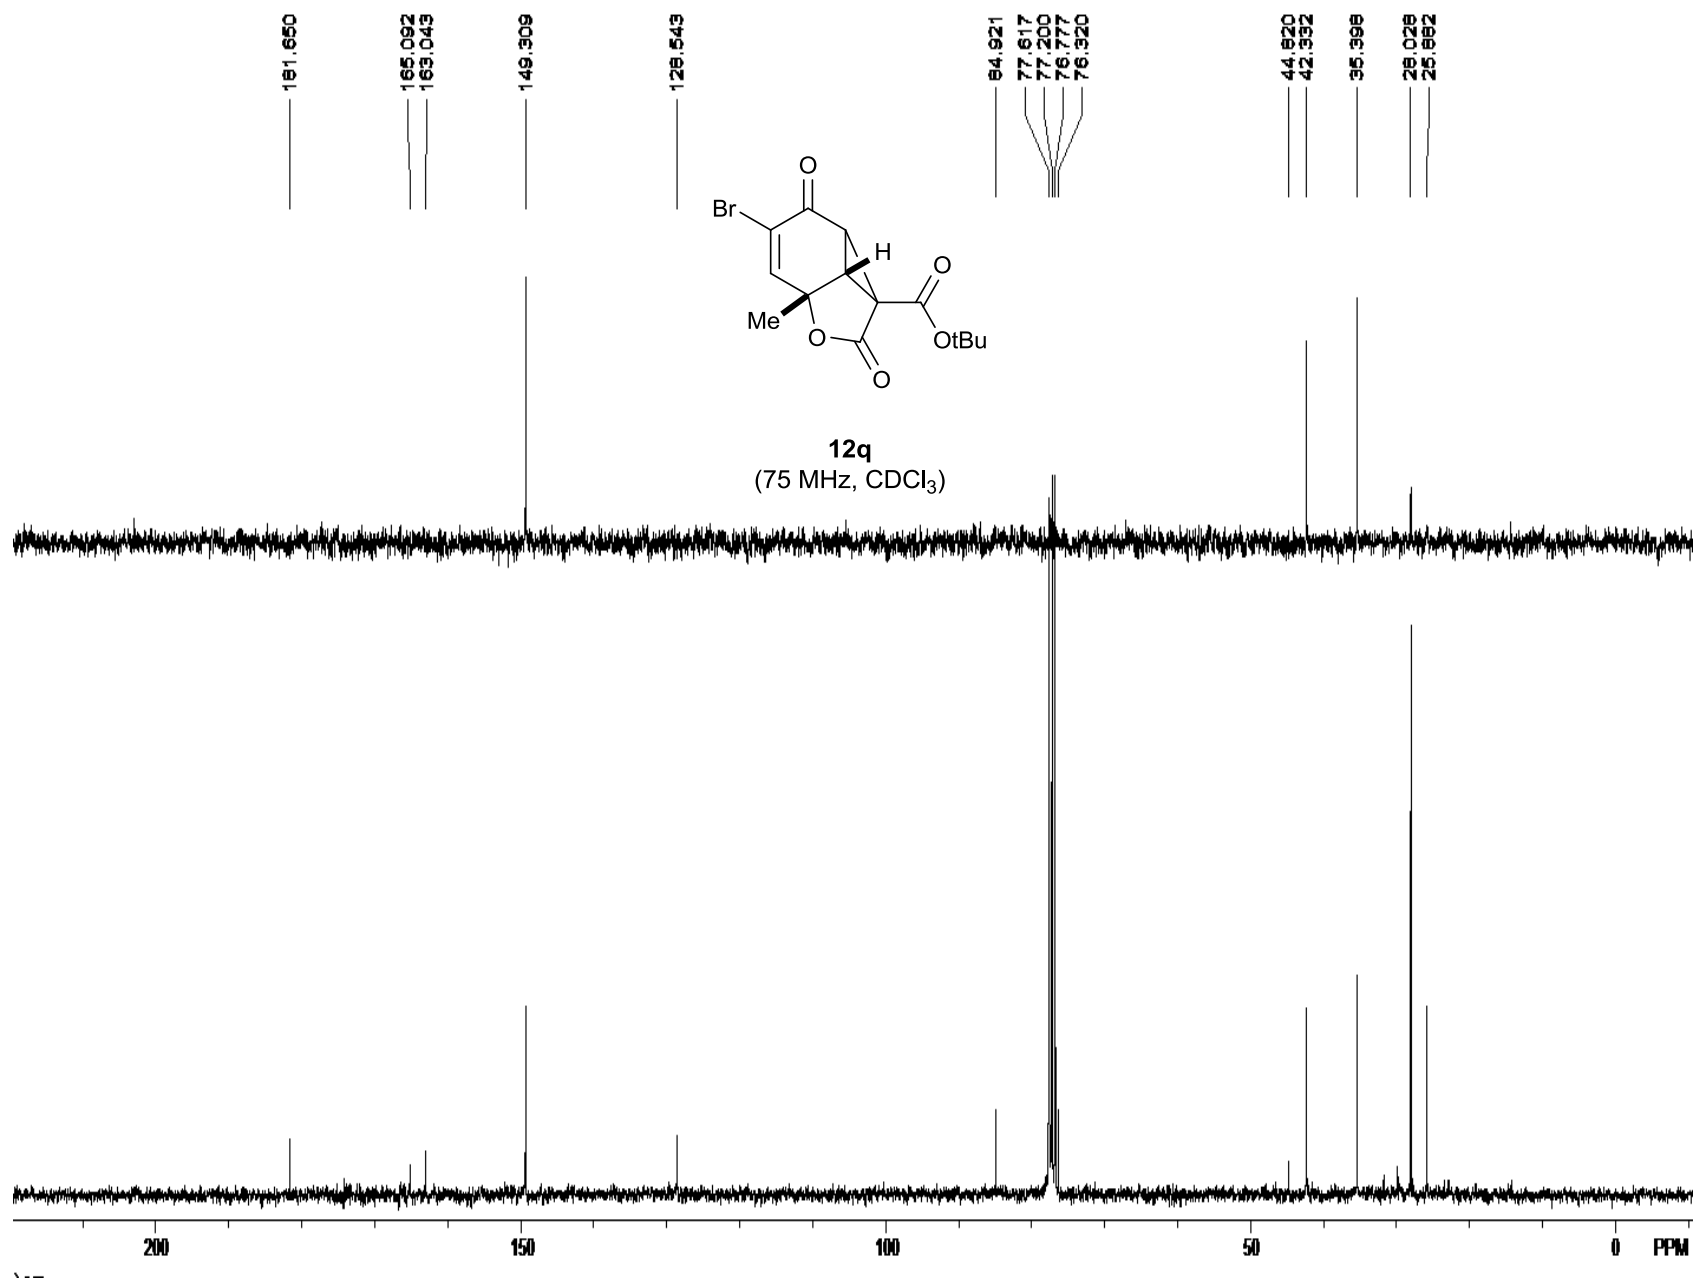

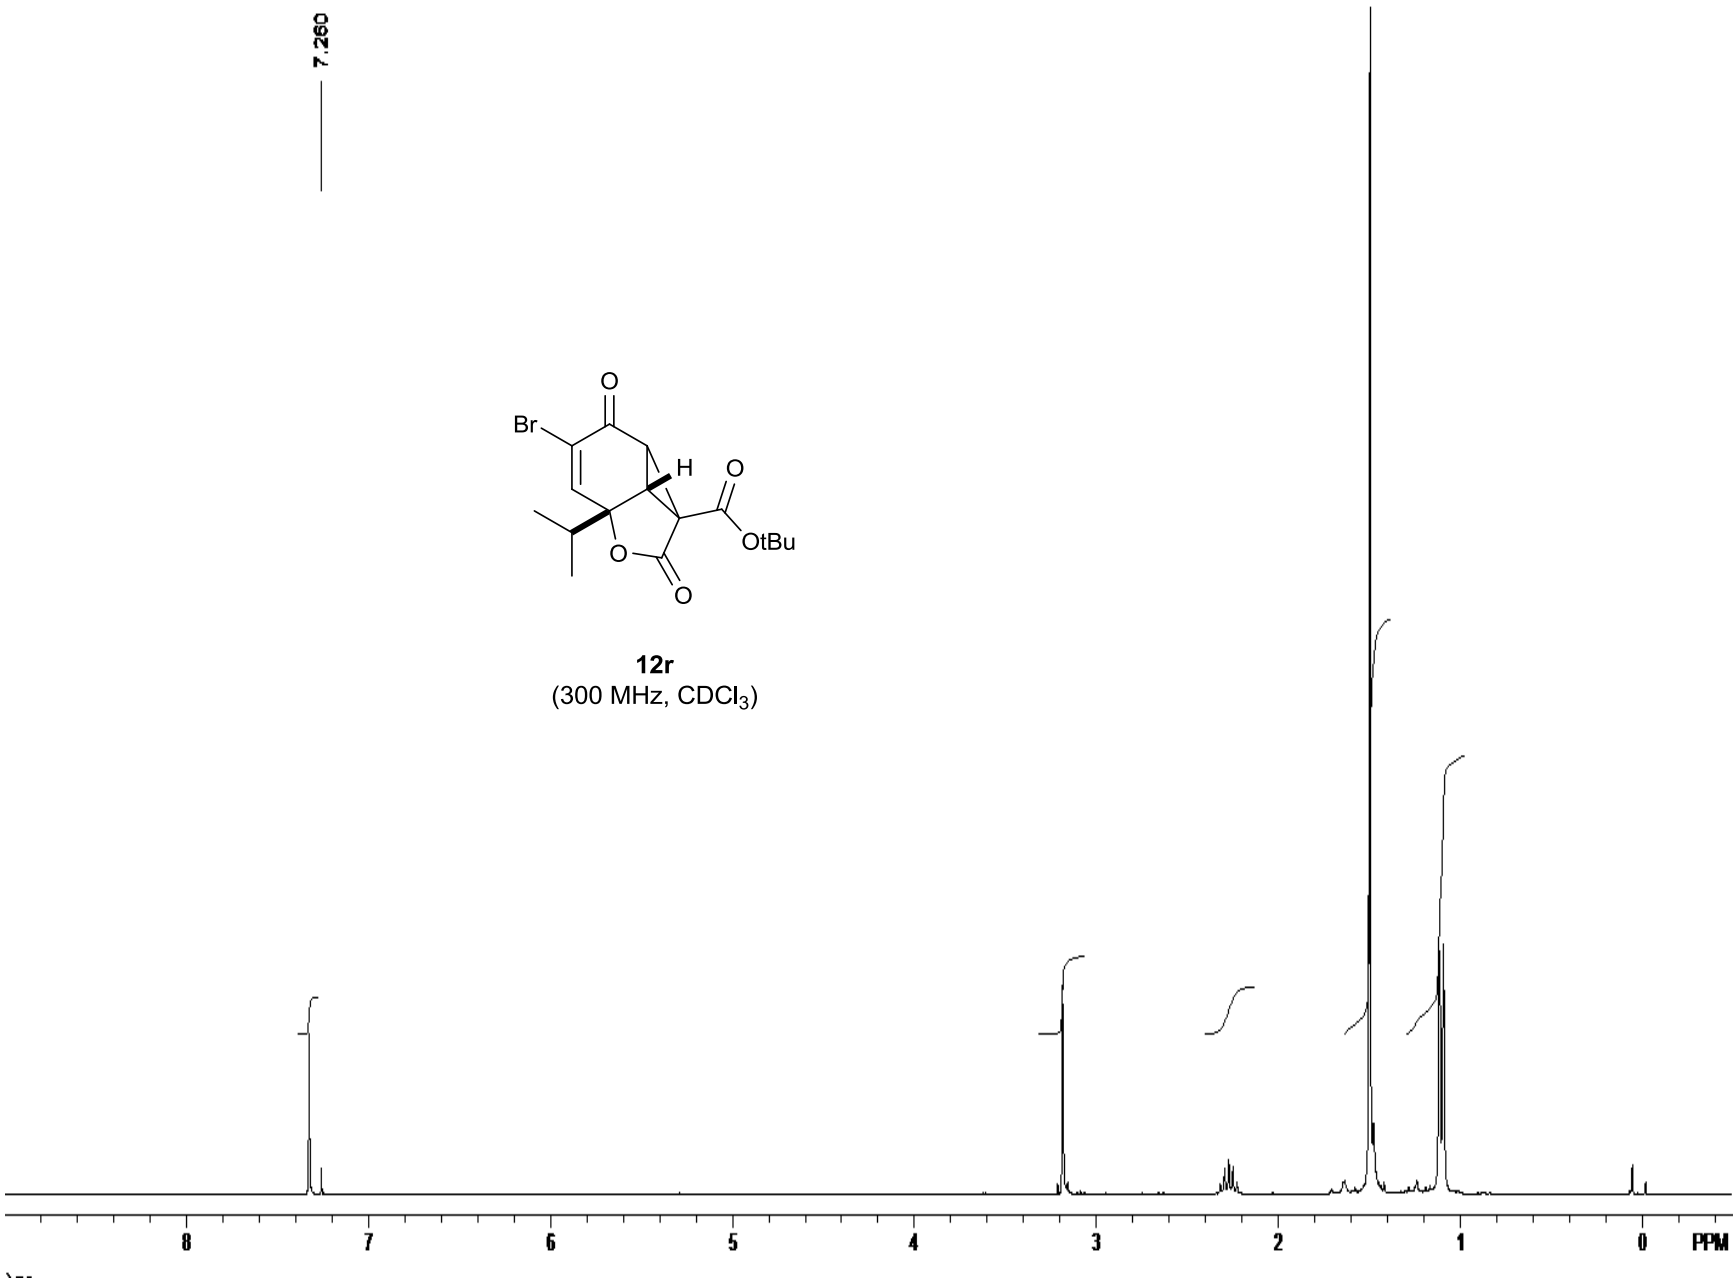

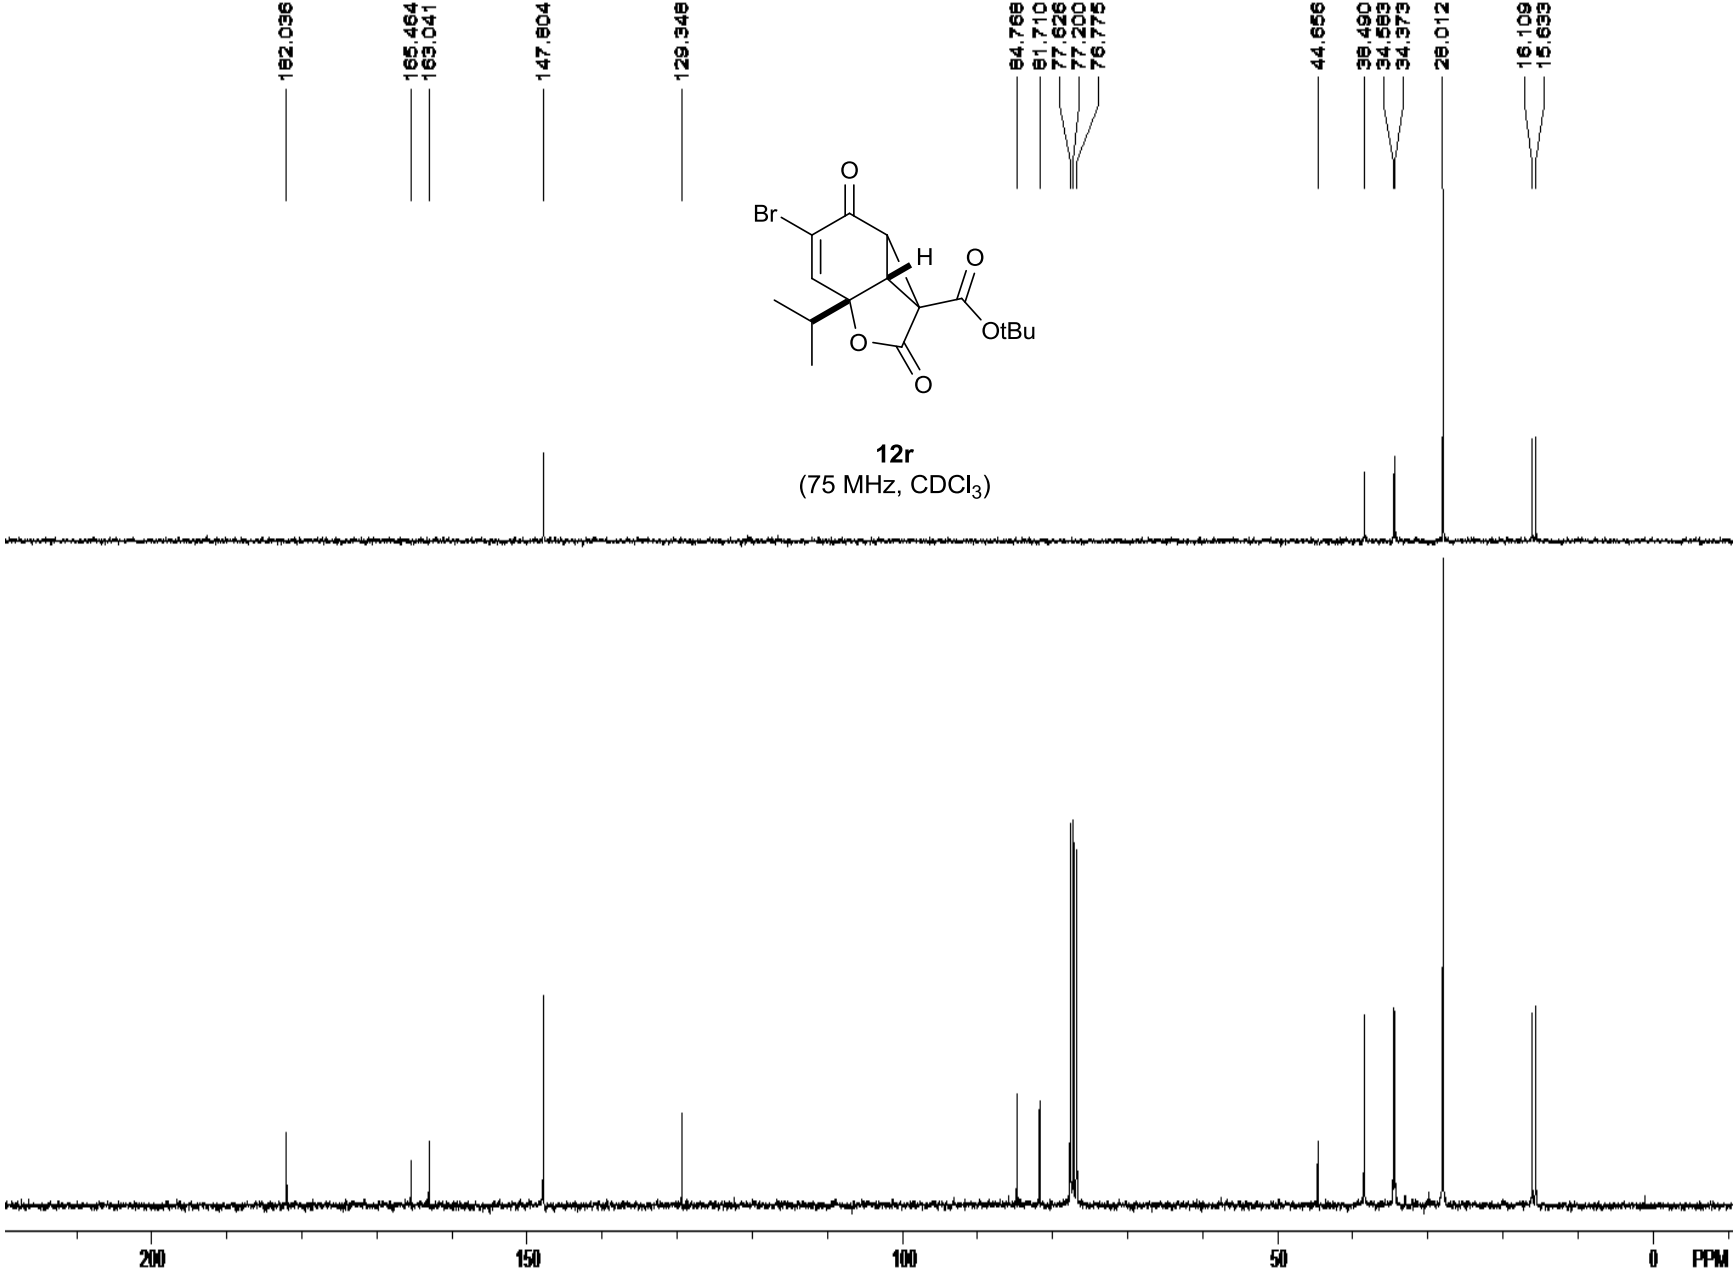

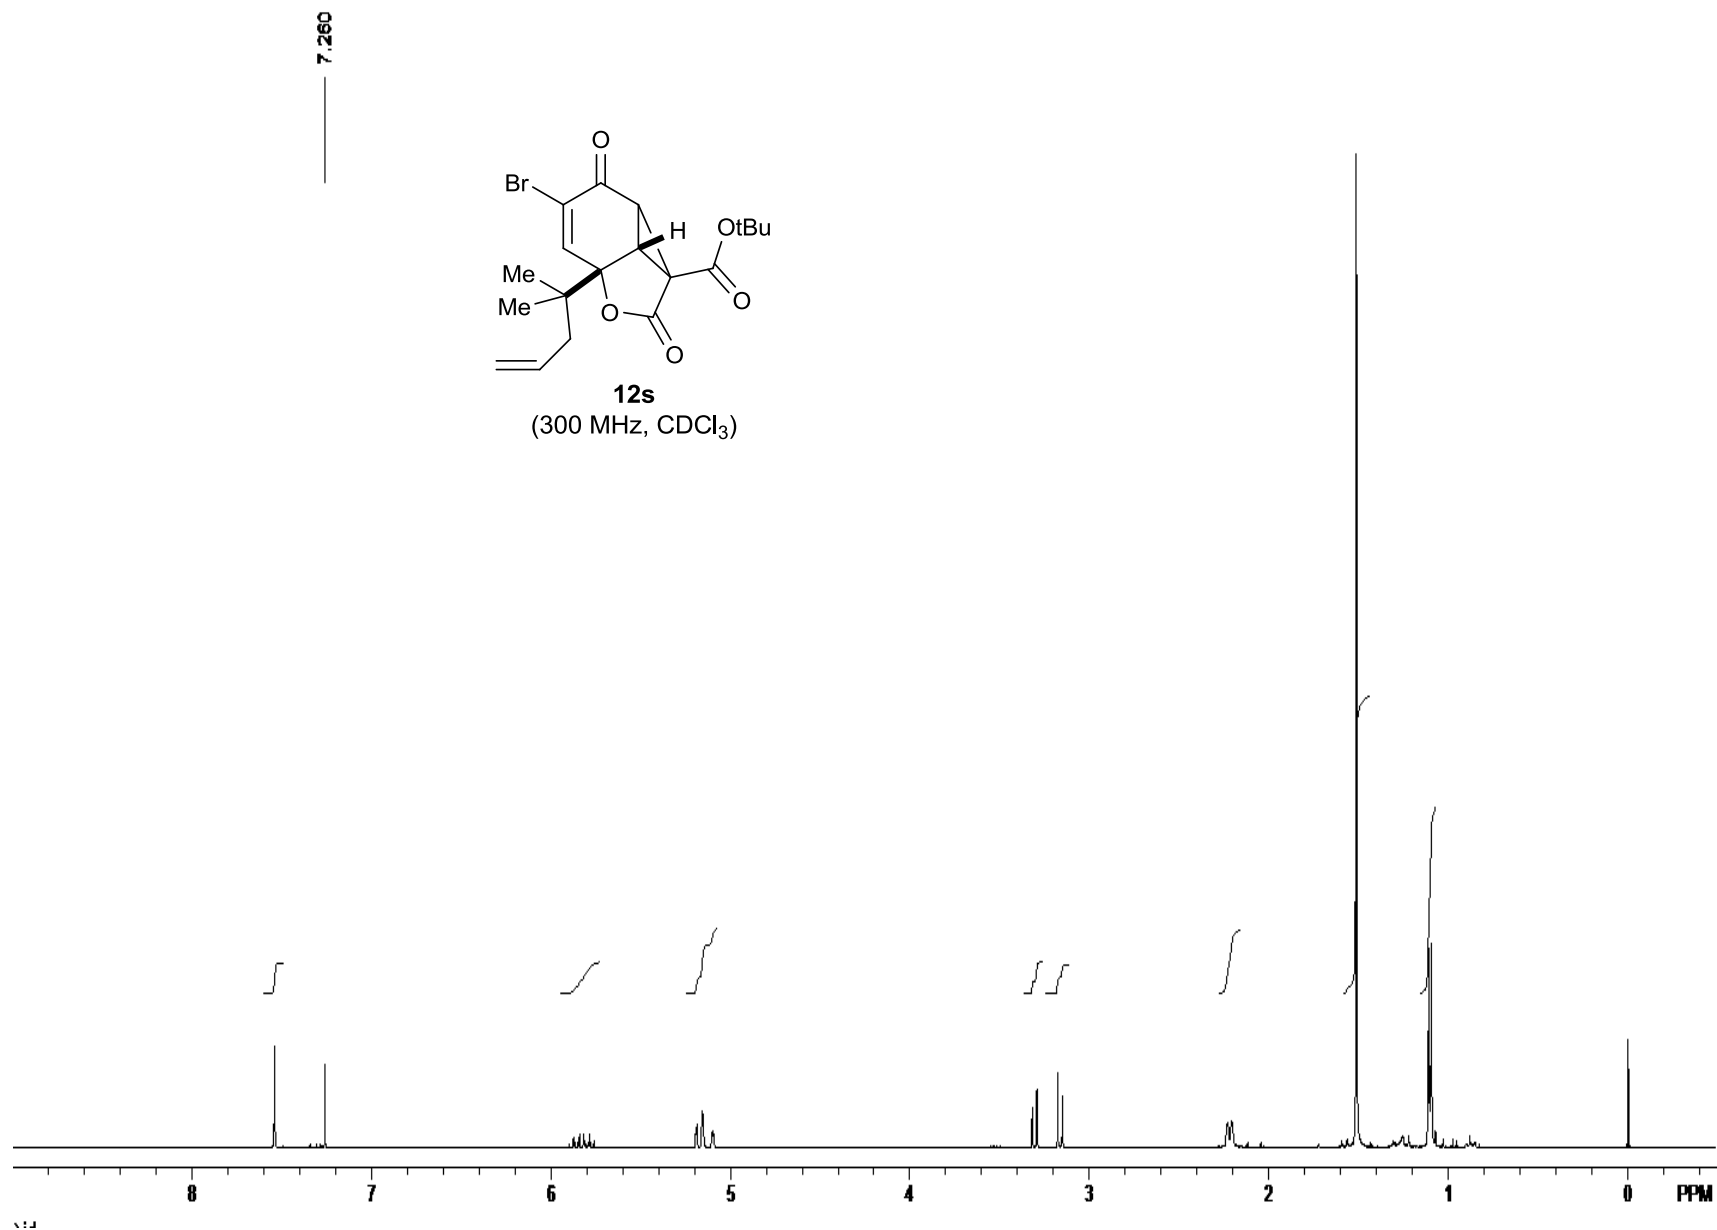

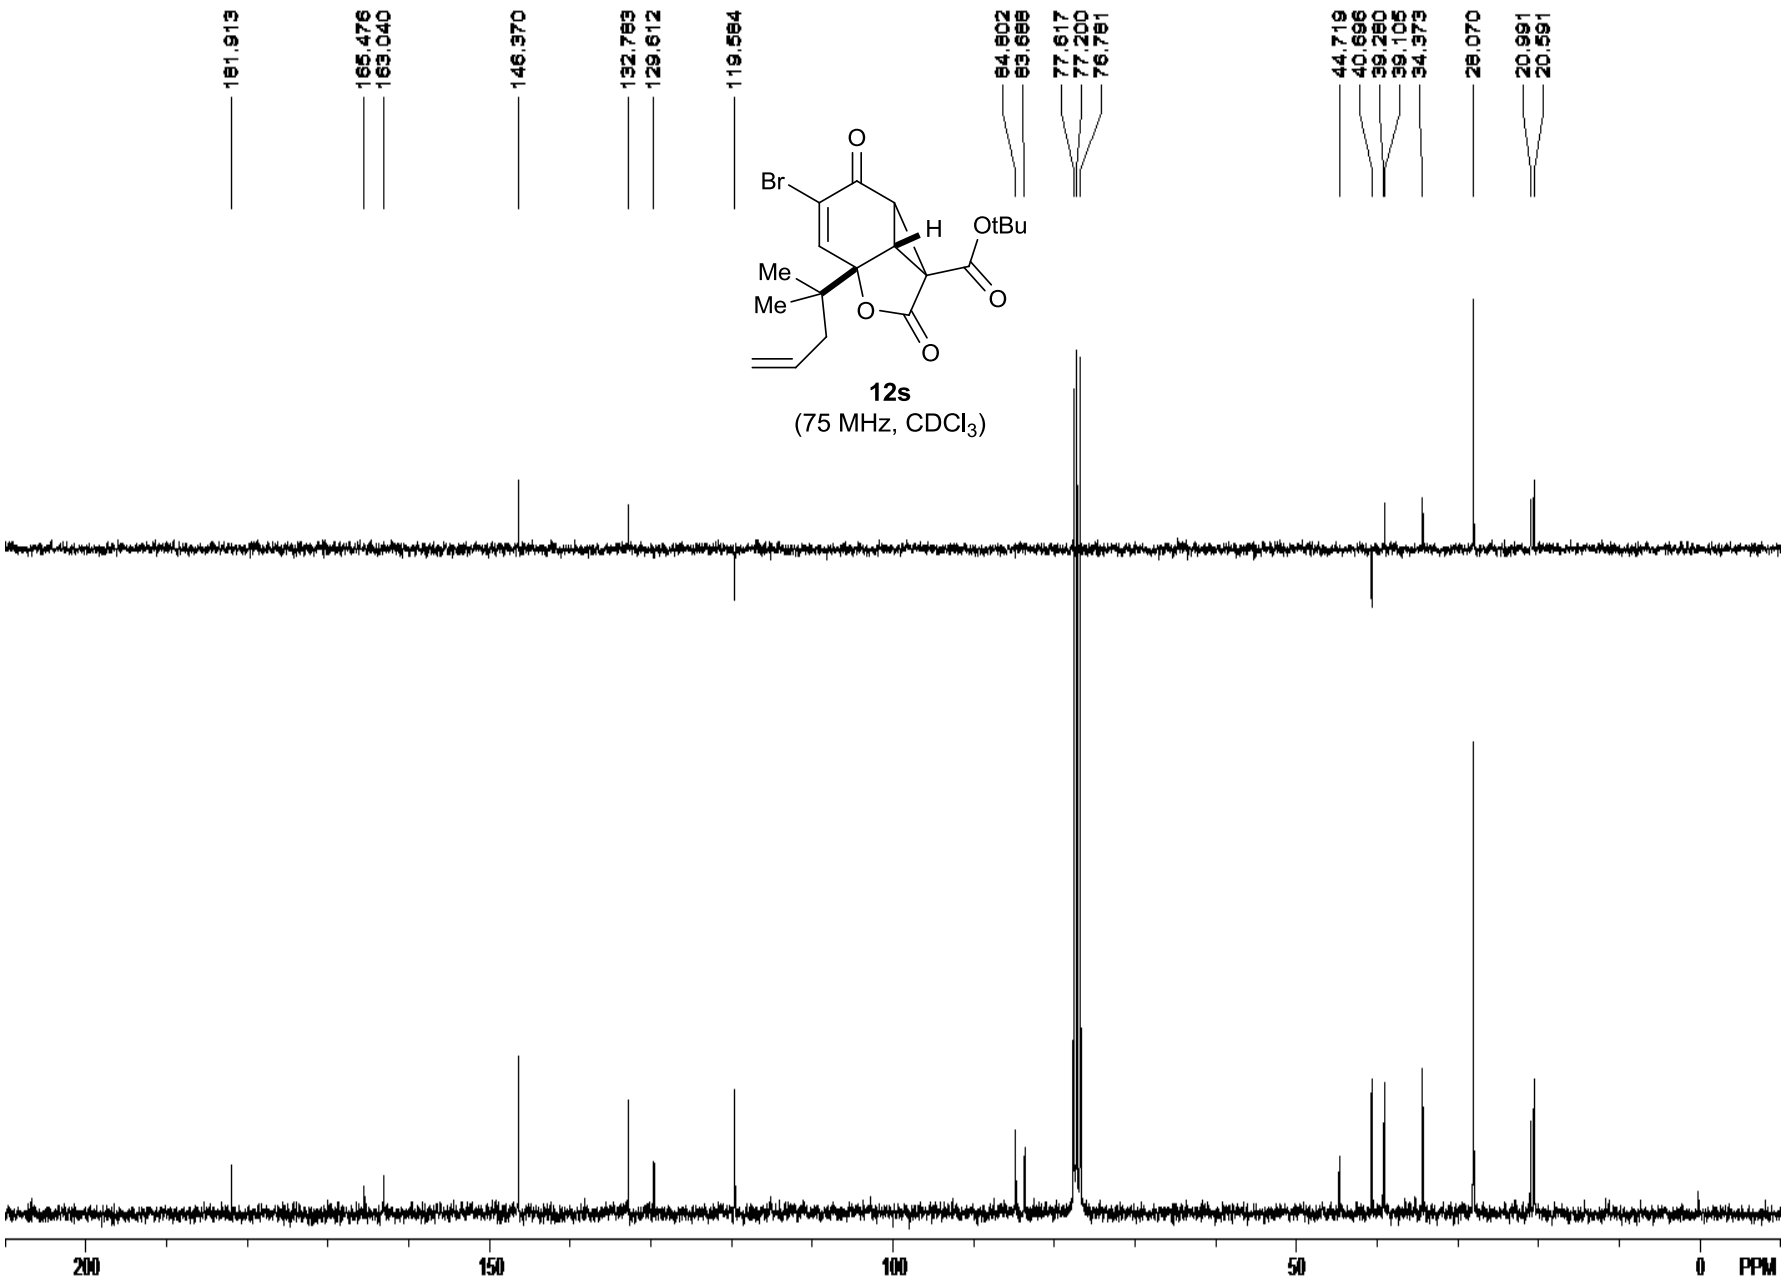

499.87 MHz  
cdcl3

7.26

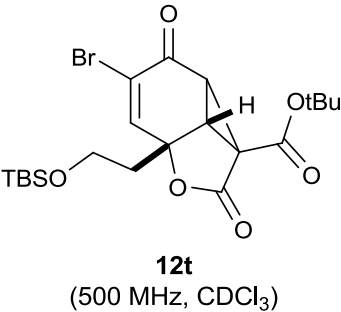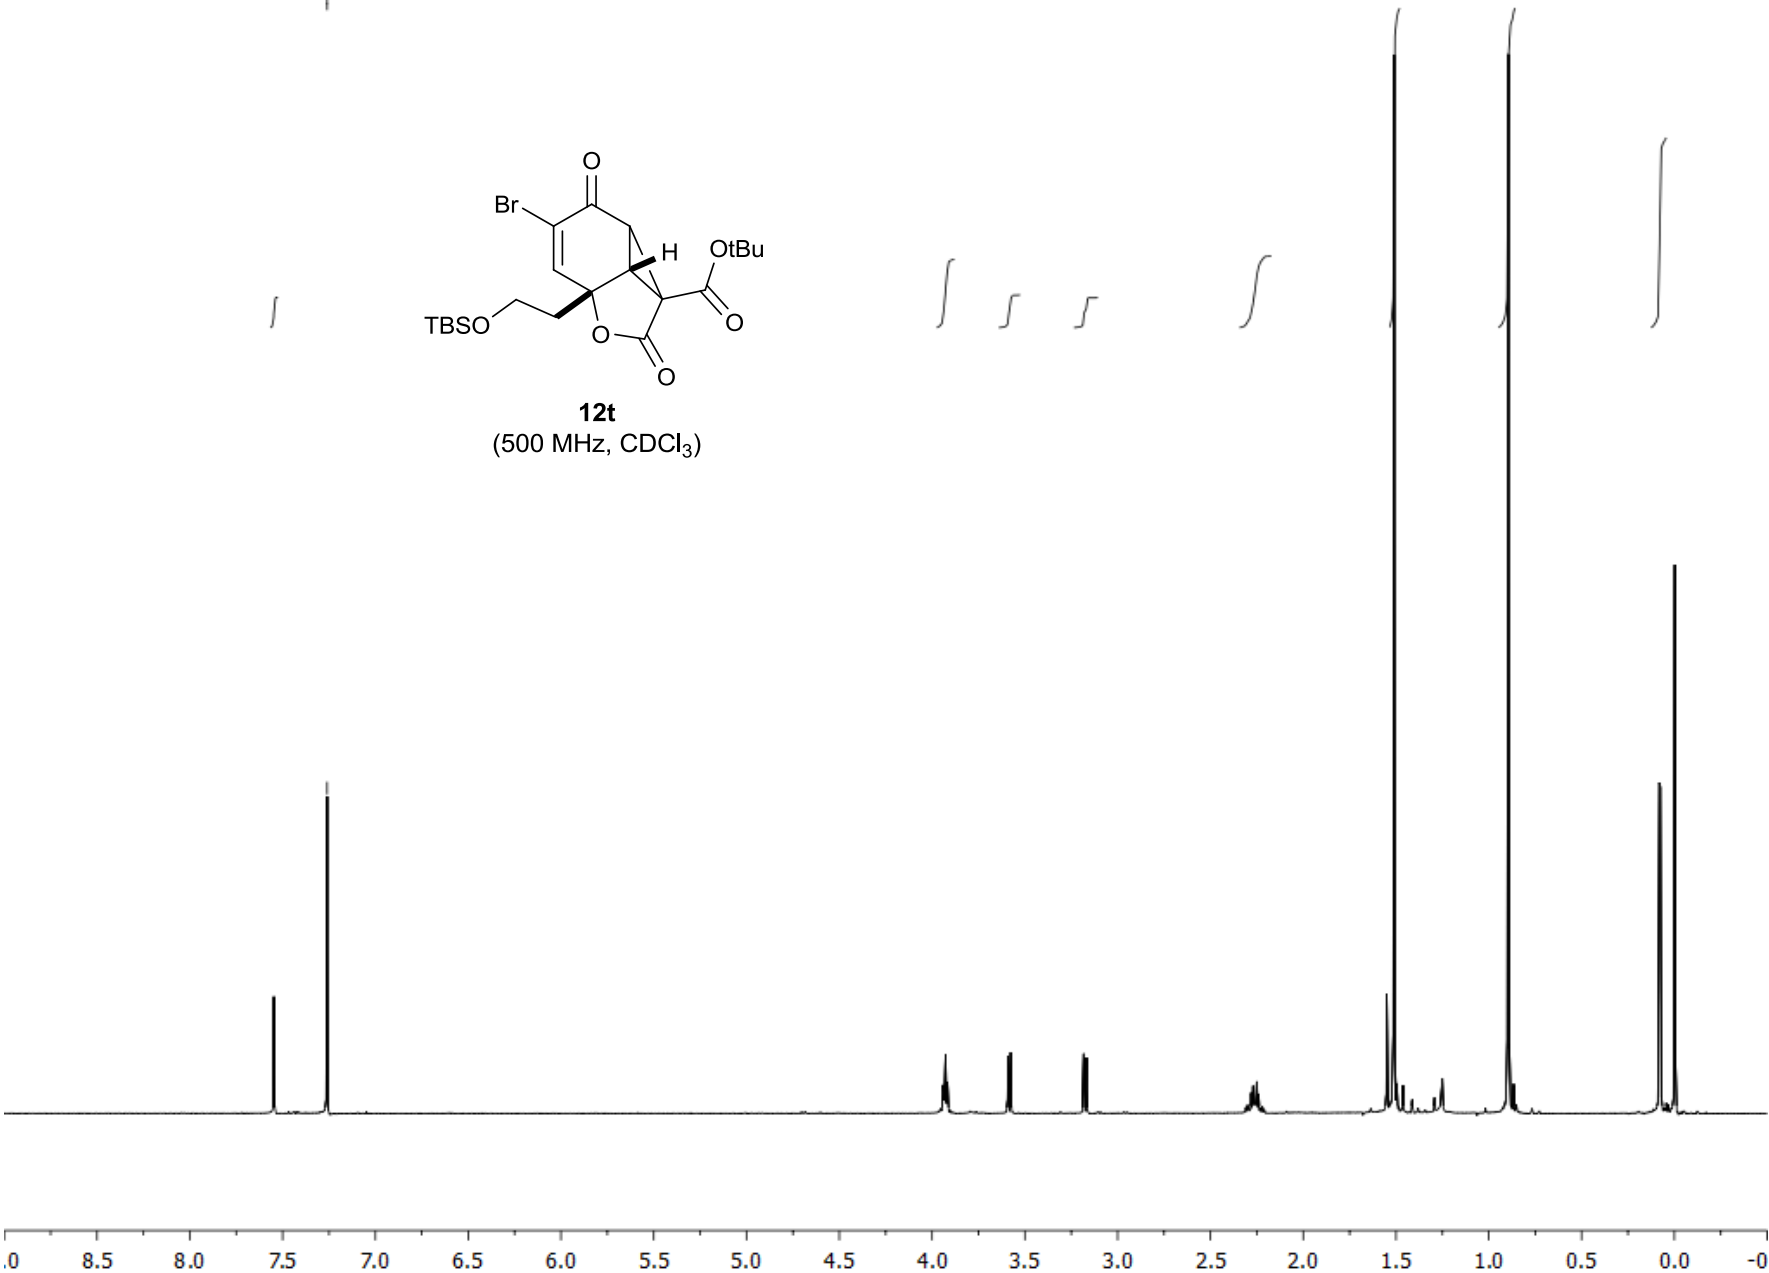

75.43 MHz  
CDCl<sub>3</sub>

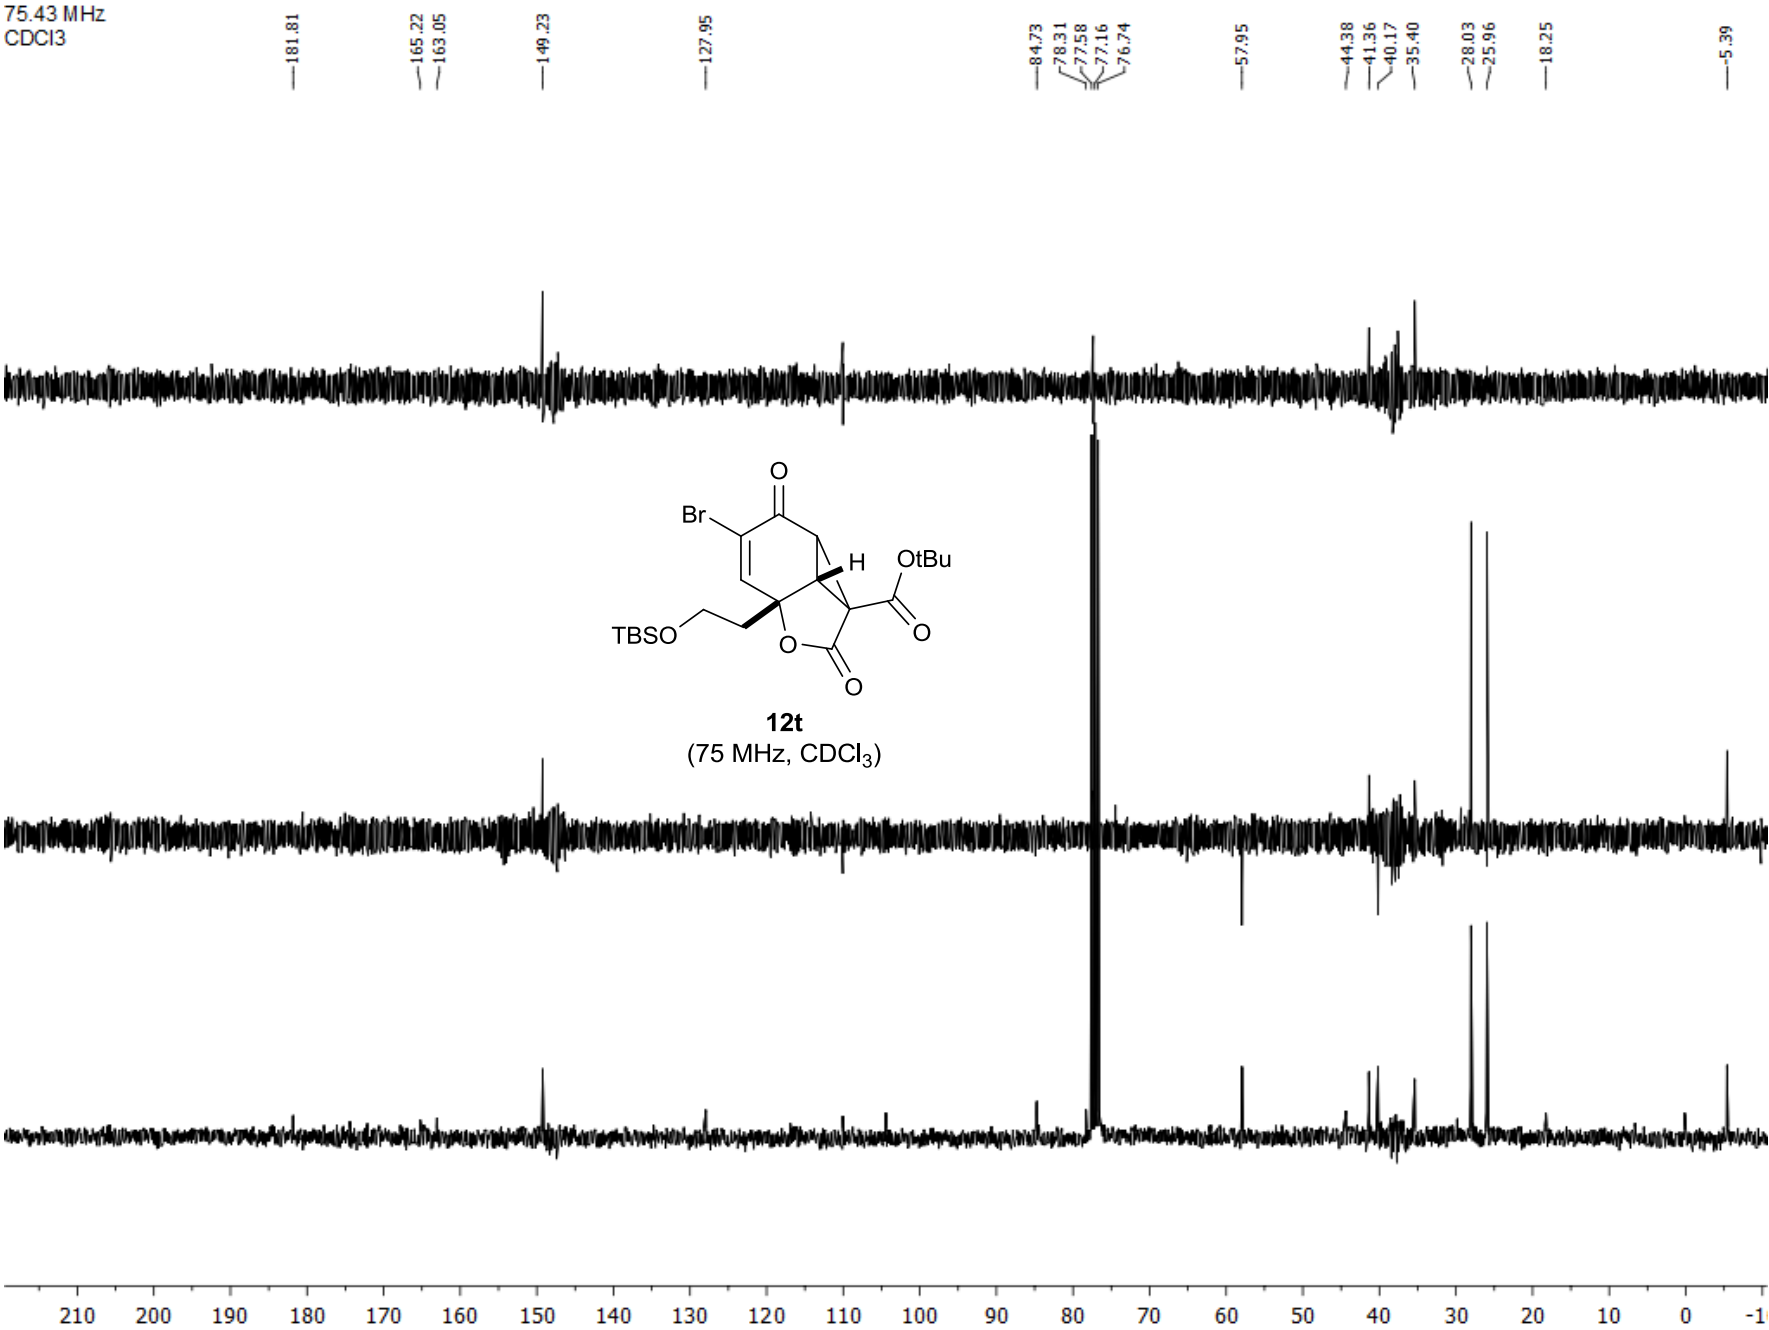

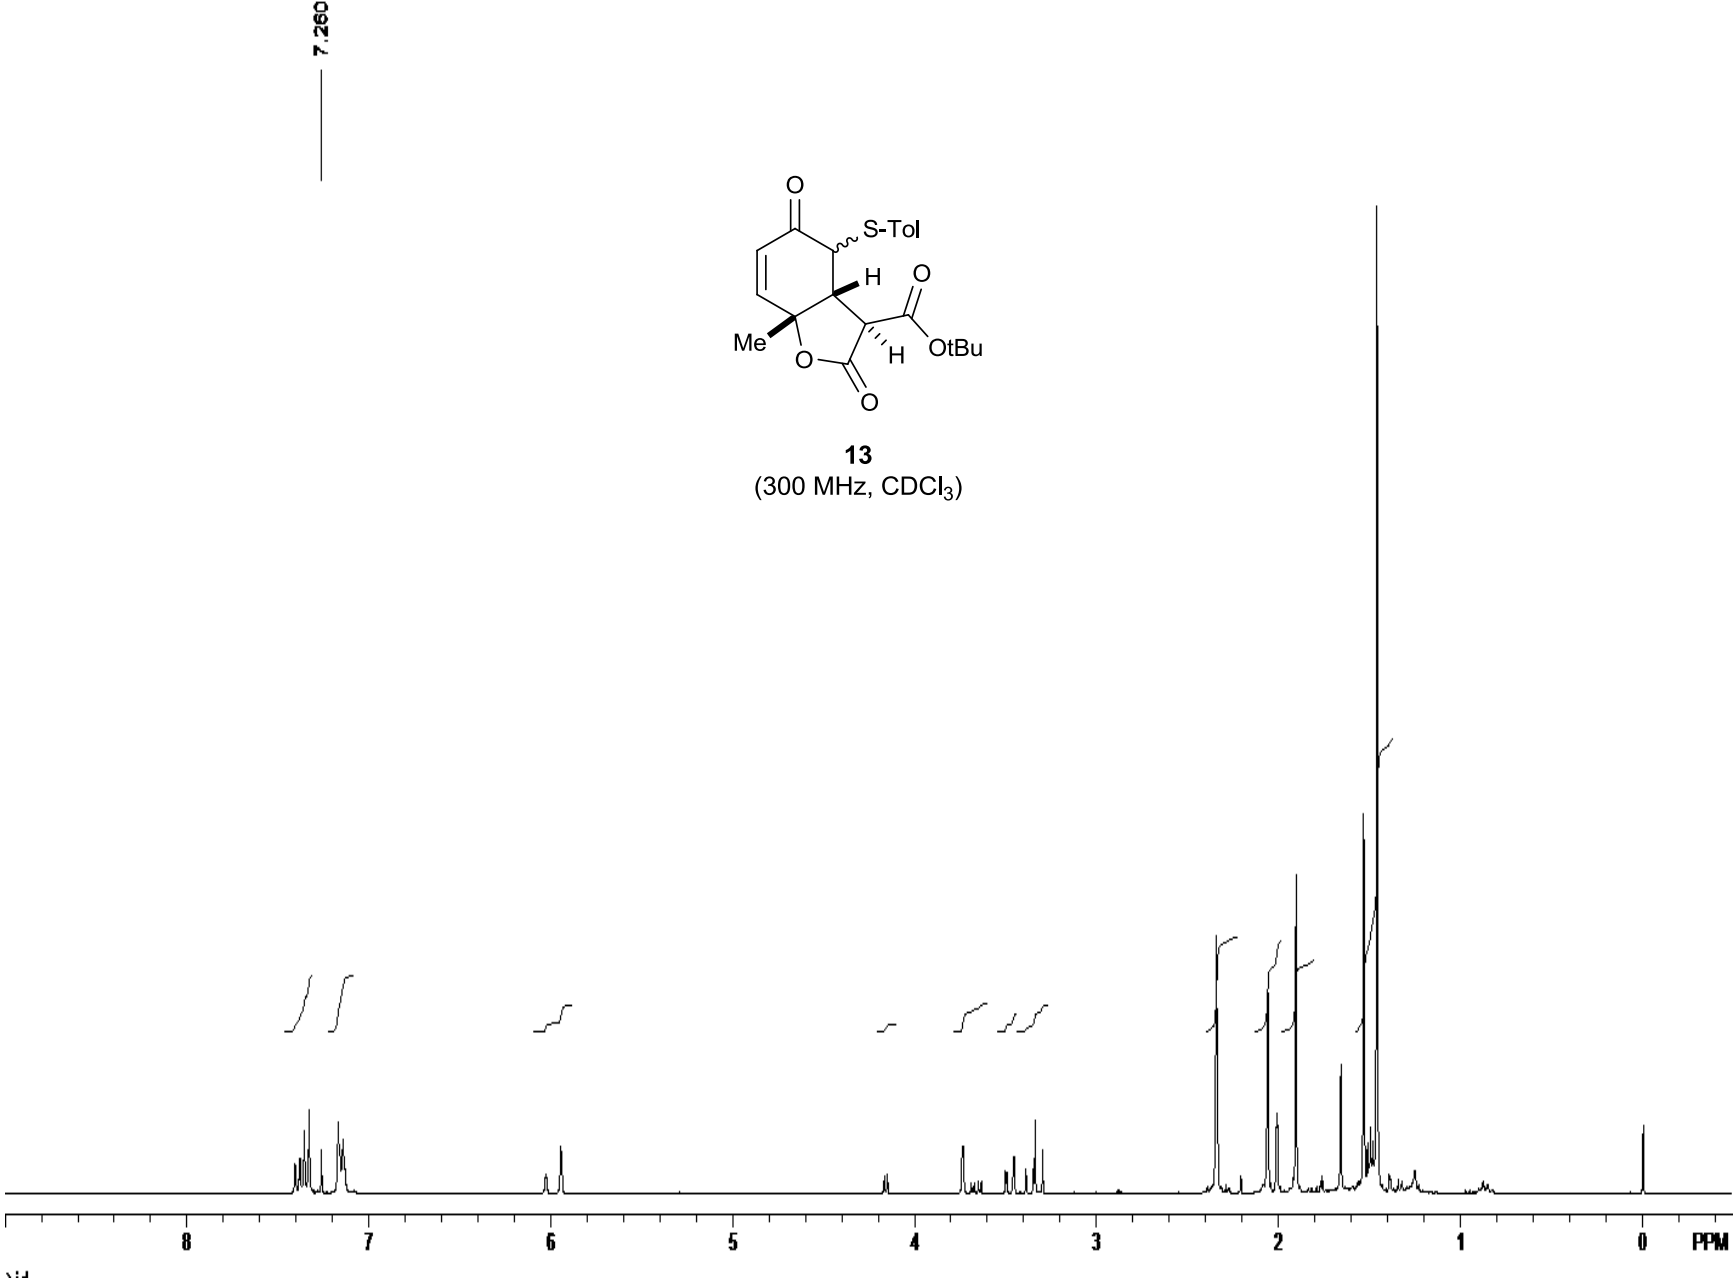



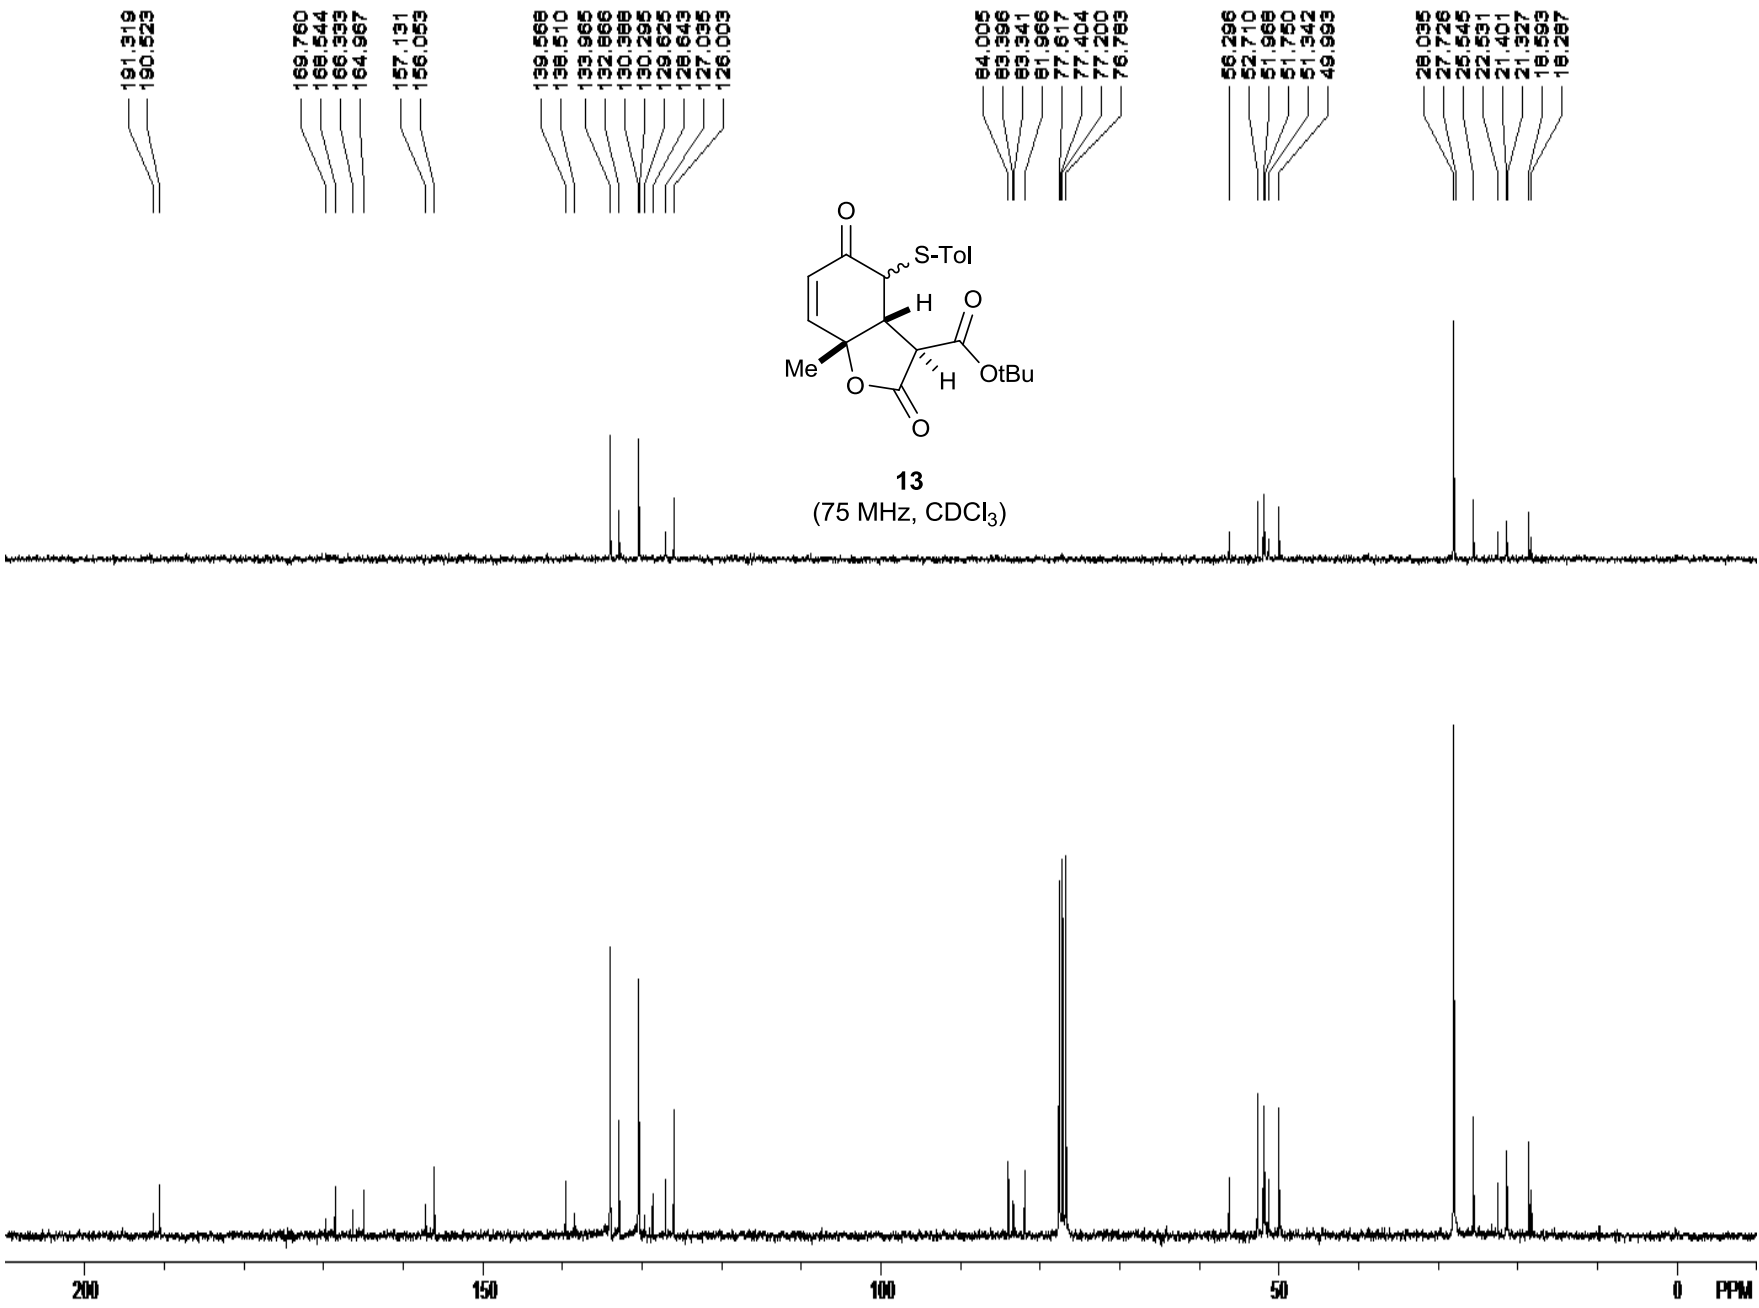

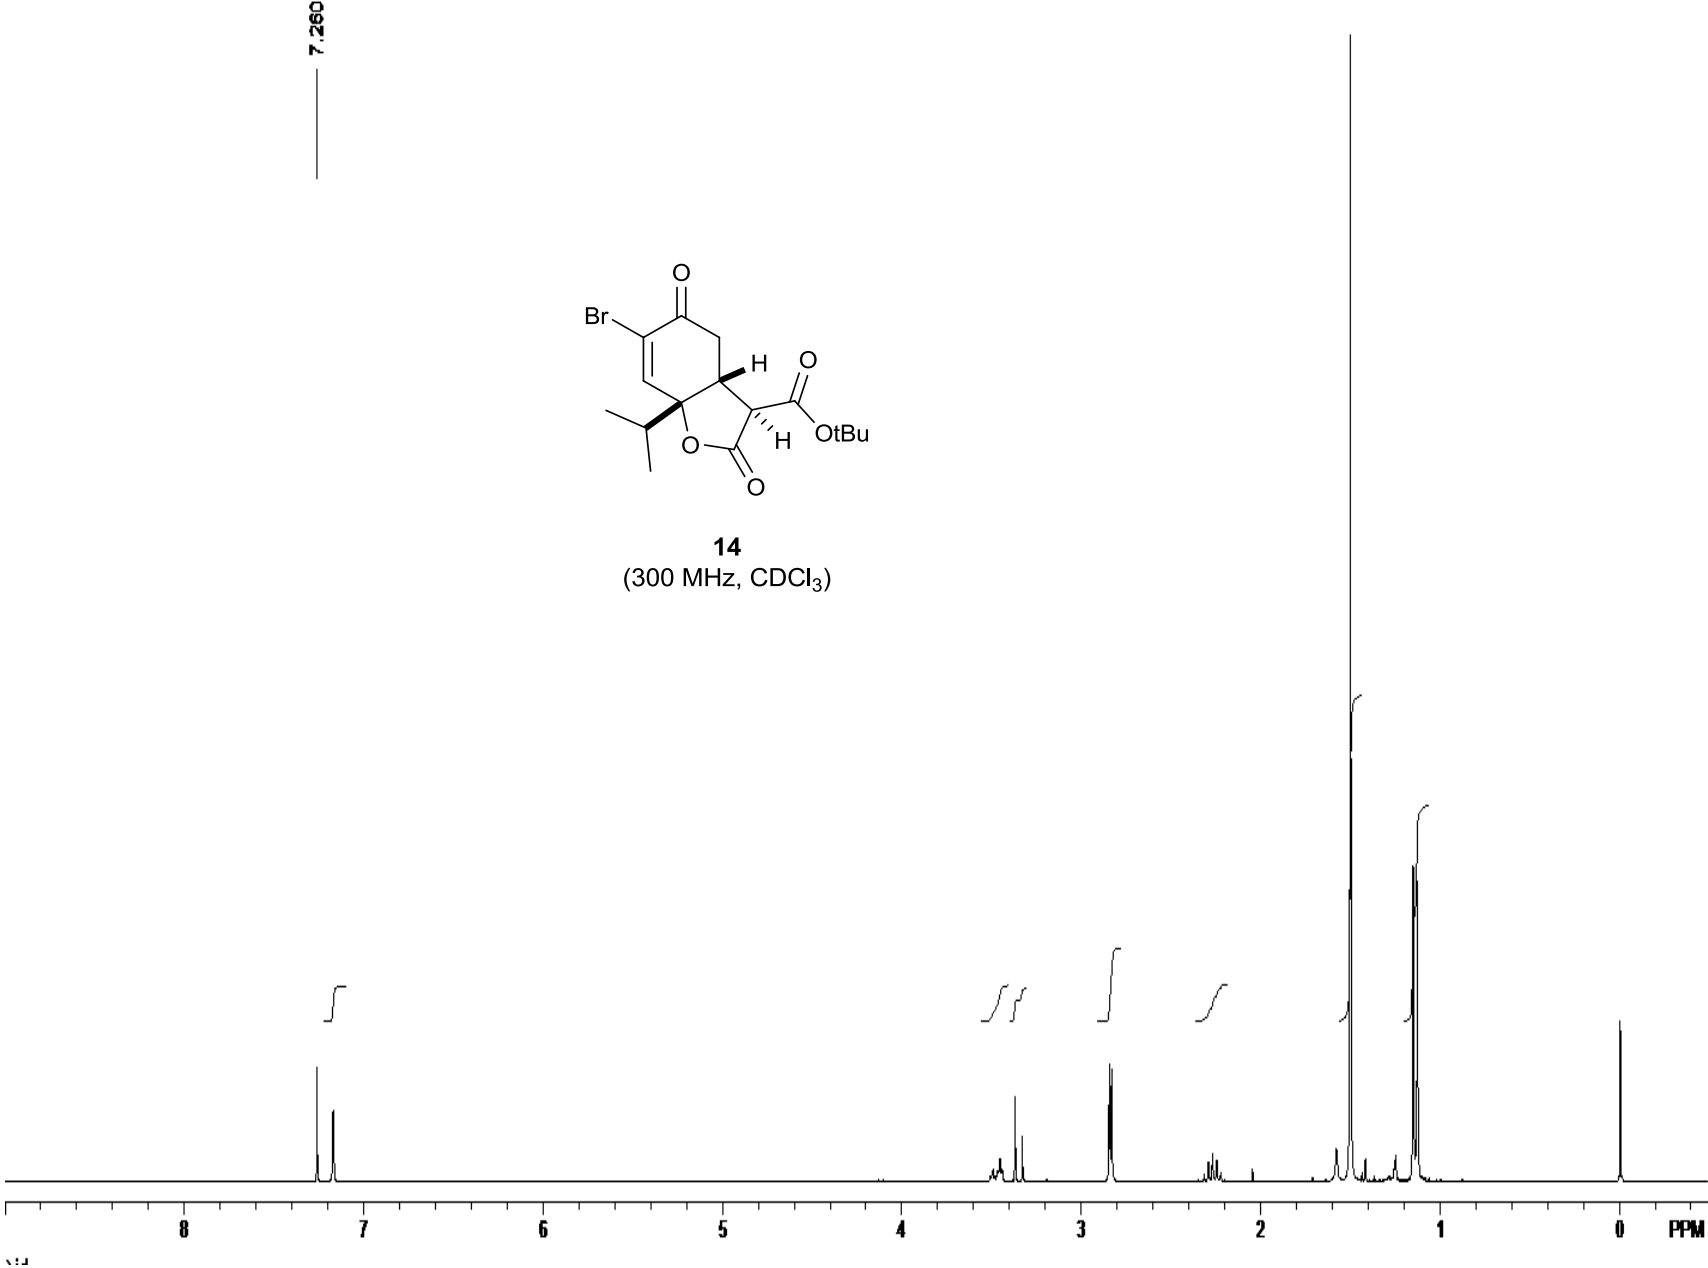

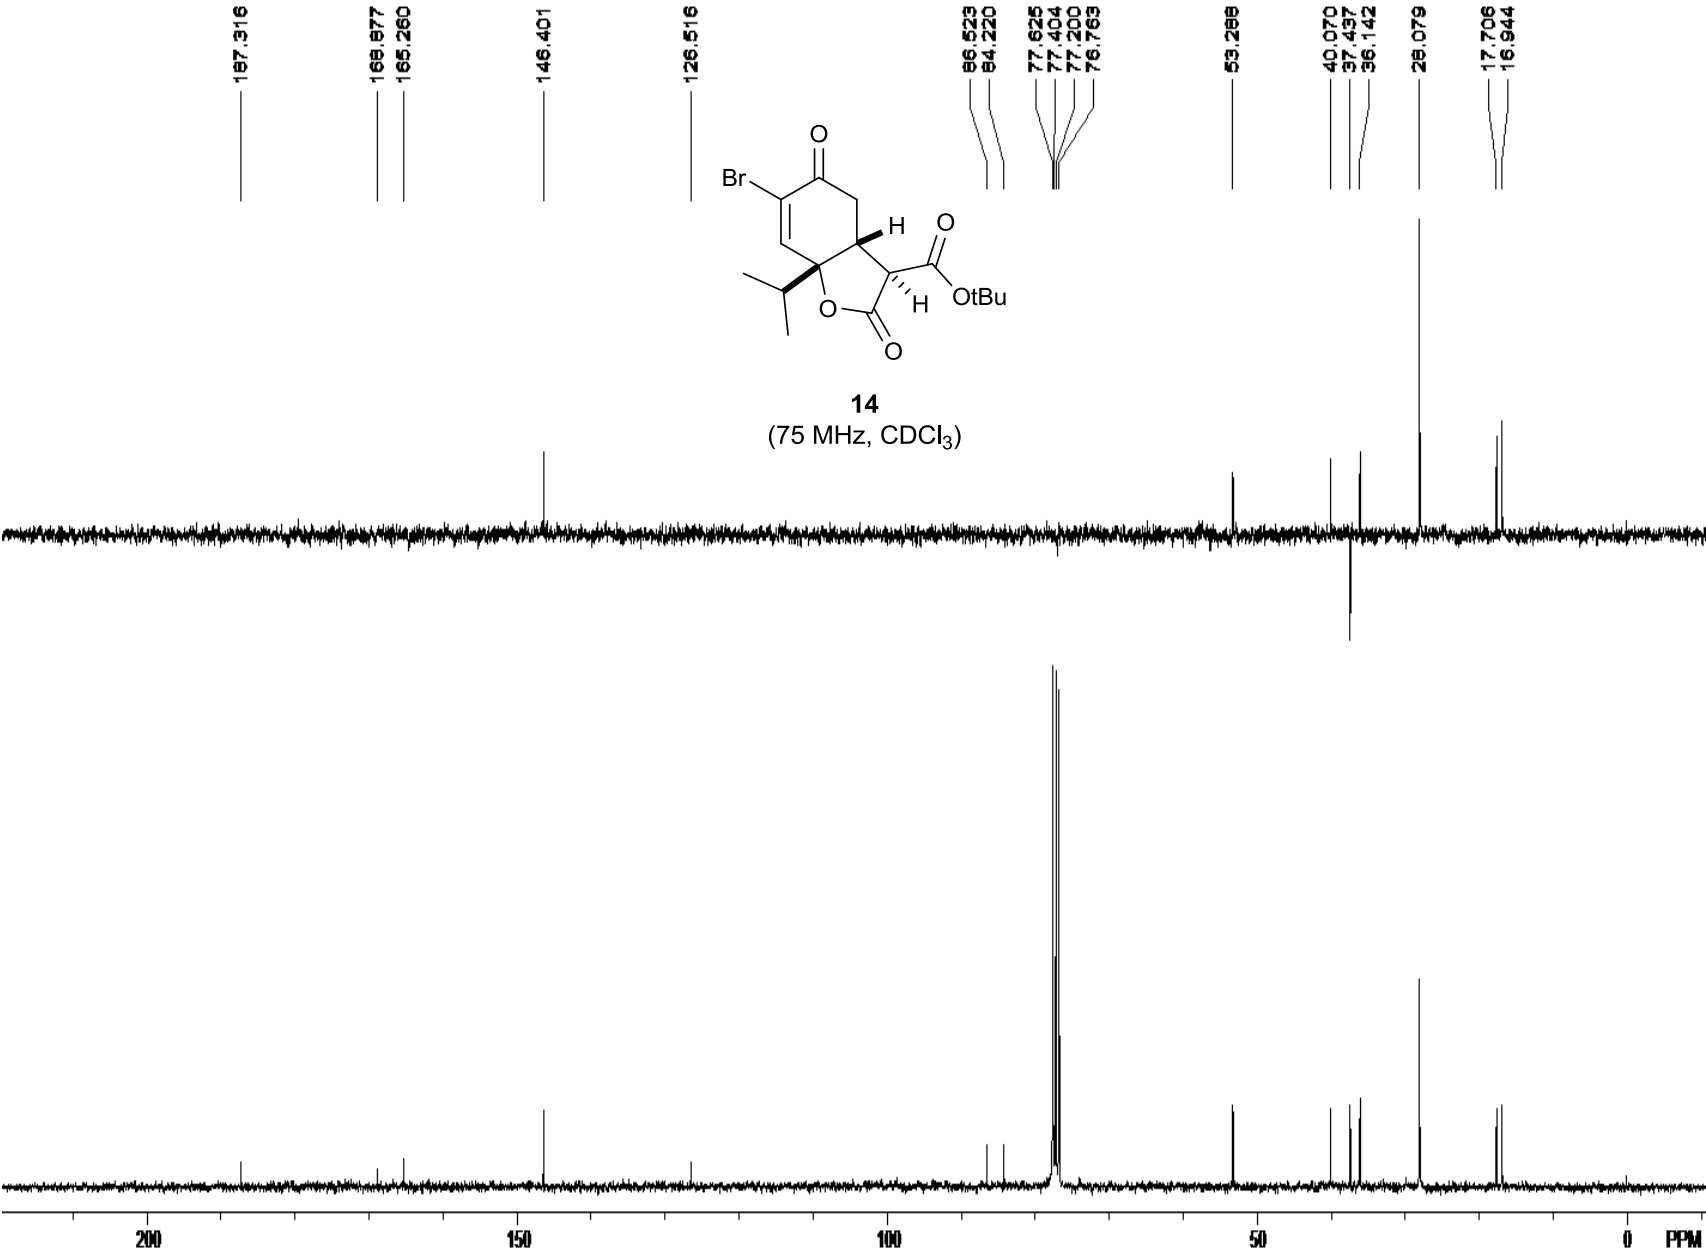

300.17 MHz  
cdcl3

7.26

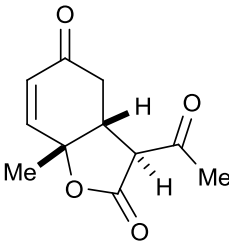

**16**  
(300 MHz, CDCl<sub>3</sub>)

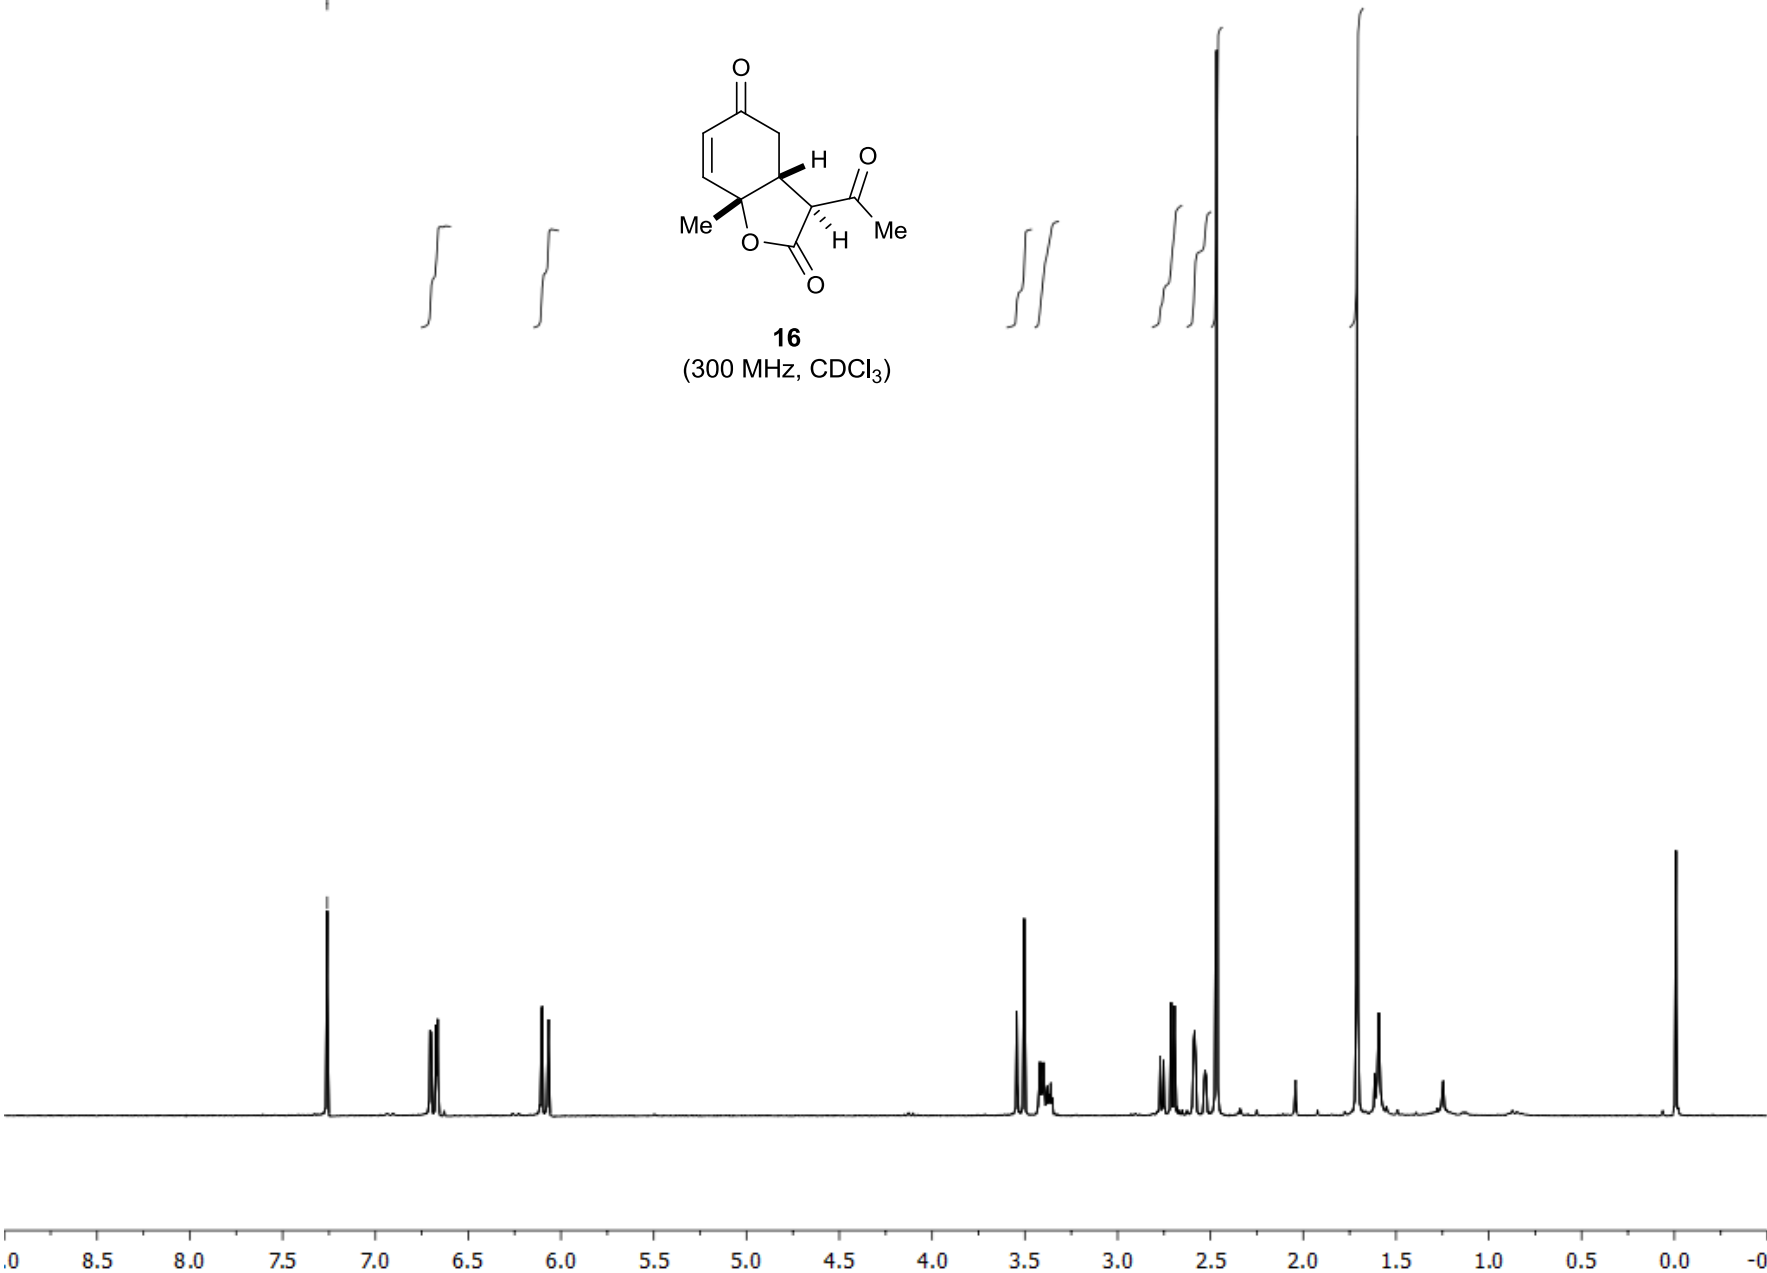

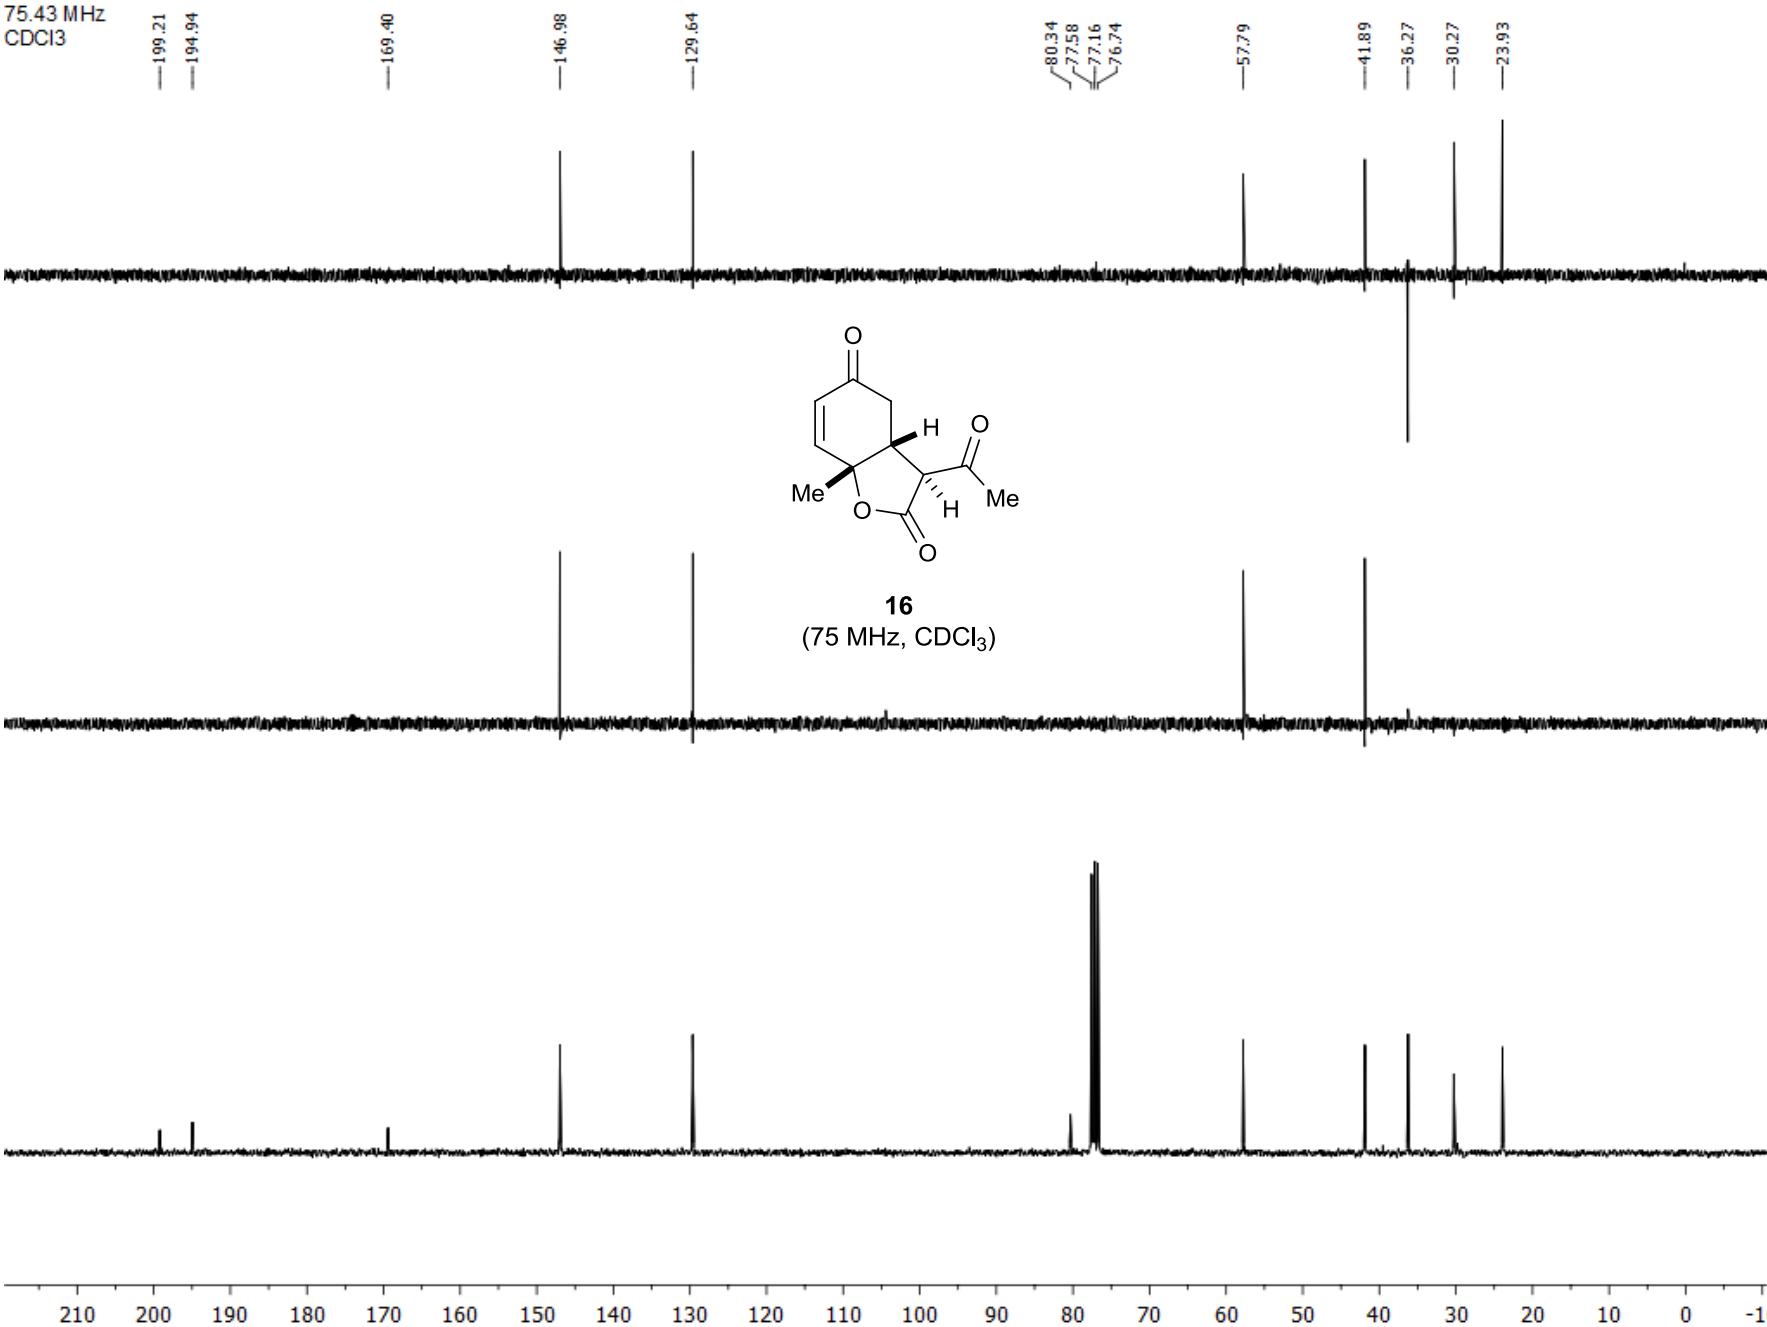

## HPLC Chromatograms

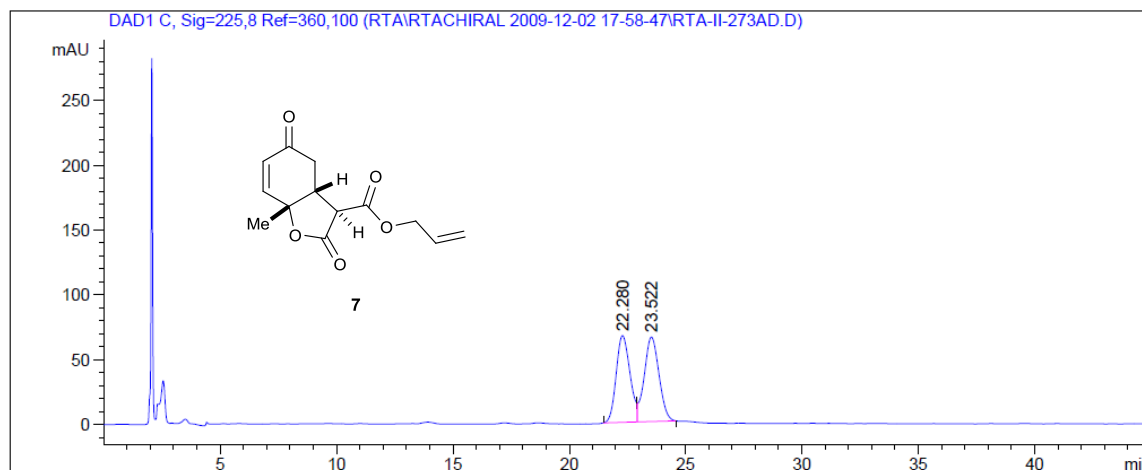

Signal 1: DAD1 C, Sig=225,8 Ref=360,100

| Peak #   | RetTime [min] | Type | Width [min] | Area [mAU*s] | Height [mAU] | Area %  |
|----------|---------------|------|-------------|--------------|--------------|---------|
| 1        | 22.280        | BV   | 0.6444      | 2795.66748   | 67.33952     | 49.0167 |
| 2        | 23.522        | VB   | 0.6810      | 2907.83618   | 65.61931     | 50.9833 |
| Totals : |               |      |             | 5703.50366   | 132.95883    |         |

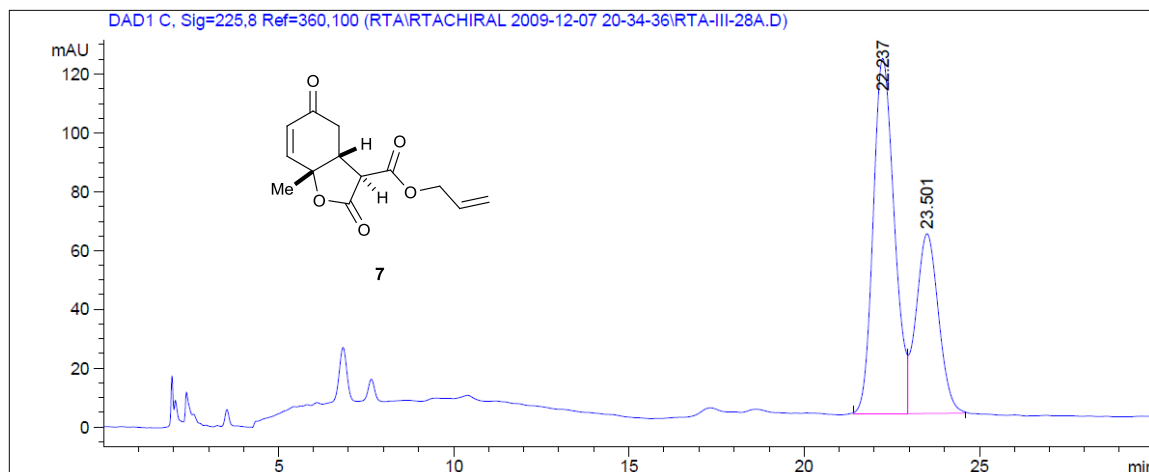

Signal 1: DAD1 C, Sig=225,8 Ref=360,100

| Peak #   | RetTime [min] | Type | Width [min] | Area [mAU*s] | Height [mAU] | Area %  |
|----------|---------------|------|-------------|--------------|--------------|---------|
| 1        | 22.237        | BV   | 0.6541      | 5080.52344   | 120.93938    | 65.0589 |
| 2        | 23.501        | VB   | 0.6860      | 2728.58838   | 61.21568     | 34.9411 |
| Totals : |               |      |             | 7809.11182   | 182.15506    |         |

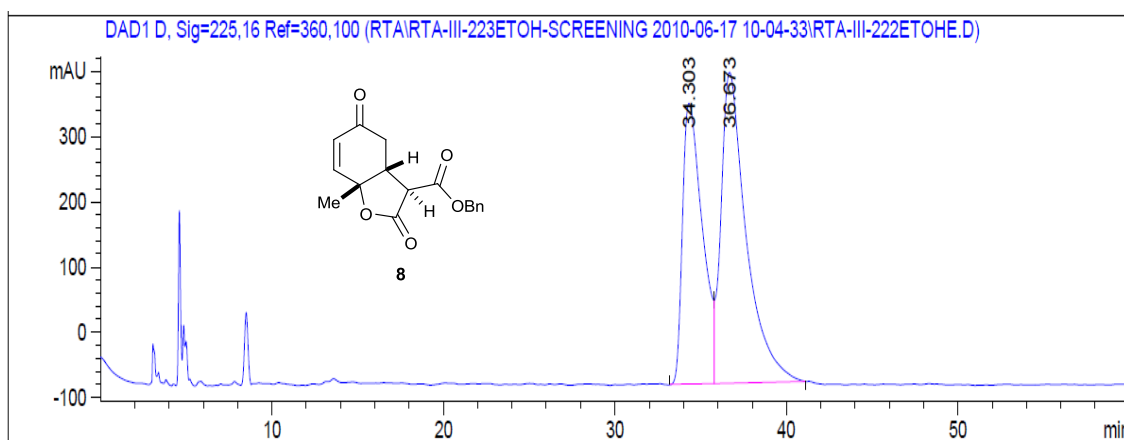

Signal 3: DAD1 D, Sig=225,16 Ref=360,100

| Peak #   | RetTime [min] | Type | Width [min] | Area [mAU*s] | Height [mAU] | Area %  |
|----------|---------------|------|-------------|--------------|--------------|---------|
| 1        | 34.303        | BV   | 1.1955      | 3.44614e4    | 430.69736    | 41.3495 |
| 2        | 36.673        | VB   | 1.5104      | 4.88805e4    | 476.65475    | 58.6505 |
| Totals : |               |      |             | 8.33419e4    | 907.35211    |         |

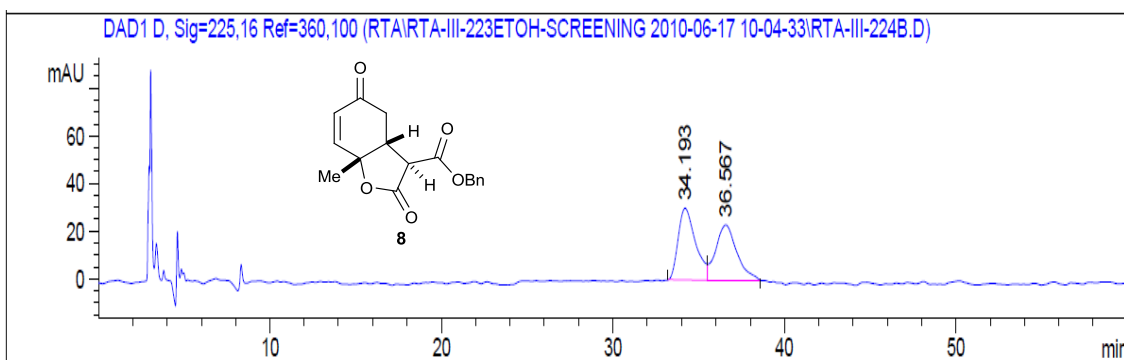

Signal 2: DAD1 D, Sig=225,16 Ref=360,100

| Peak #   | RetTime [min] | Type | Width [min] | Area [mAU*s] | Height [mAU] | Area %  |
|----------|---------------|------|-------------|--------------|--------------|---------|
| 1        | 34.193        | BV   | 1.0614      | 2150.87451   | 30.25681     | 51.8370 |
| 2        | 36.567        | VB   | 1.2581      | 1998.42957   | 23.31288     | 48.1630 |
| Totals : |               |      |             | 4149.30408   | 53.56969     |         |

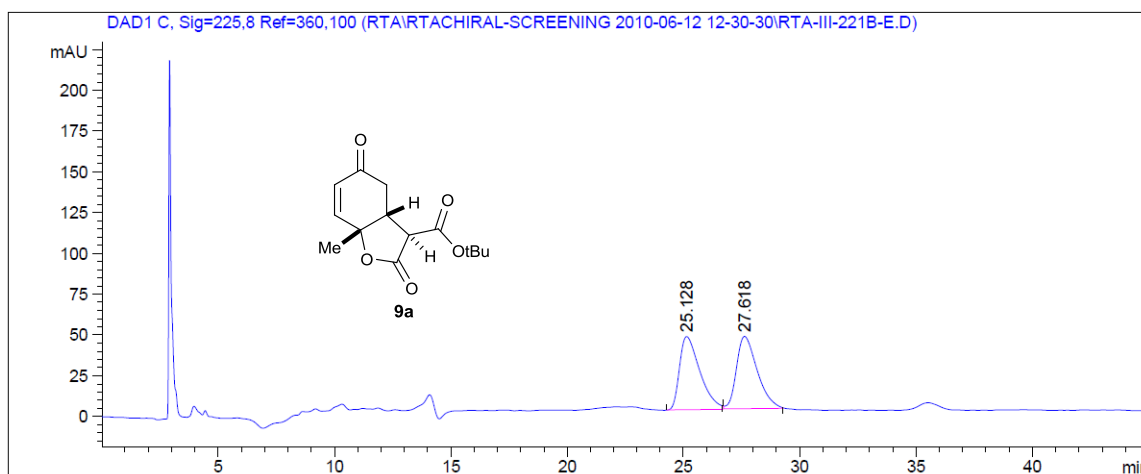

Signal 1: DAD1 C, Sig=225,8 Ref=360,100

| Peak #   | RetTime [min] | Type | Width [min] | Area [mAU*s] | Height [mAU] | Area %  |
|----------|---------------|------|-------------|--------------|--------------|---------|
| 1        | 25.128        | BB   | 0.9114      | 2732.88379   | 44.94476     | 49.5701 |
| 2        | 27.618        | BB   | 0.9339      | 2780.28638   | 44.56203     | 50.4299 |
| Totals : |               |      |             | 5513.17017   | 89.50679     |         |

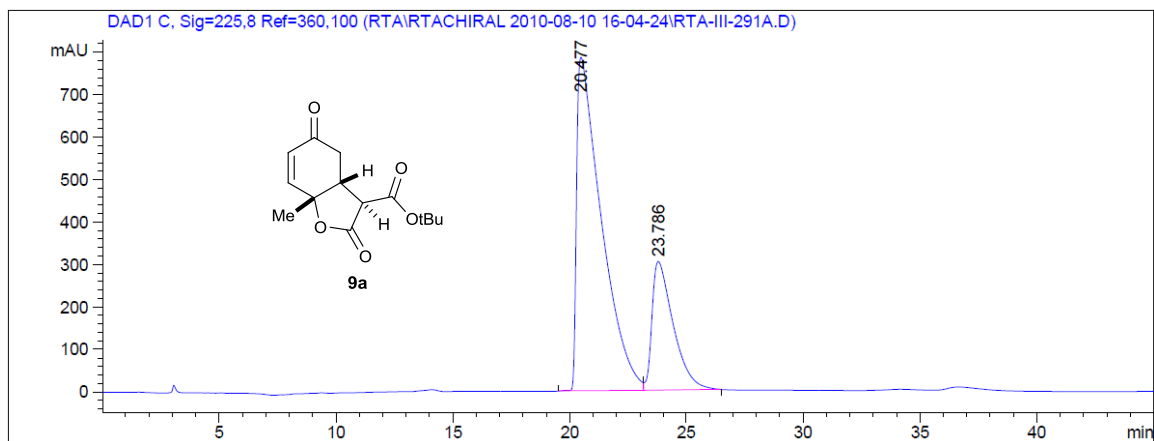

Signal 1: DAD1 C, Sig=225,8 Ref=360,100

| Peak #   | RetTime [min] | Type | Width [min] | Area [mAU*s] | Height [mAU] | Area %  |
|----------|---------------|------|-------------|--------------|--------------|---------|
| 1        | 20.477        | BV   | 1.0418      | 5.78117e4    | 786.26599    | 75.0149 |
| 2        | 23.786        | VB   | 0.9444      | 1.92552e4    | 303.42371    | 24.9851 |
| Totals : |               |      |             | 7.70670e4    | 1089.68970   |         |



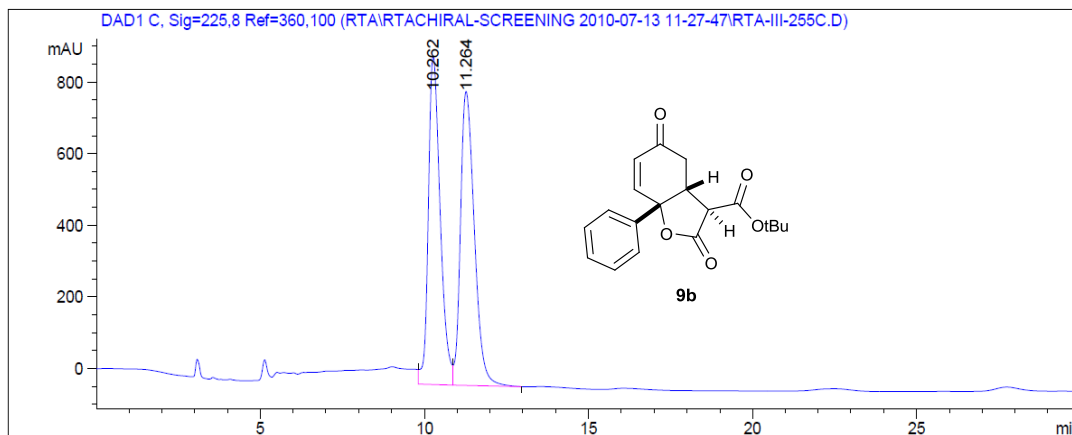

Signal 1: DAD1 C, Sig=225,8 Ref=360,100

| Peak #   | RetTime [min] | Type | Width [min] | Area [mAU*s] | Height [mAU] | Area %  |
|----------|---------------|------|-------------|--------------|--------------|---------|
| 1        | 10.262        | VV   | 0.3848      | 2.30434e4    | 918.14948    | 48.8320 |
| 2        | 11.264        | VB   | 0.4591      | 2.41457e4    | 820.97662    | 51.1680 |
| Totals : |               |      |             | 4.71892e4    | 1739.12610   |         |

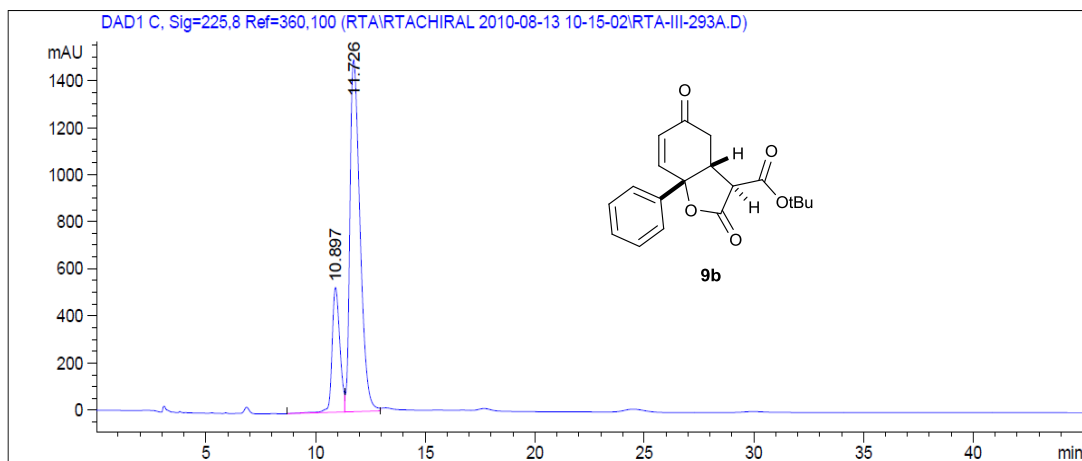

Signal 1: DAD1 C, Sig=225,8 Ref=360,100

| Peak #   | RetTime [min] | Type | Width [min] | Area [mAU*s] | Height [mAU] | Area %  |
|----------|---------------|------|-------------|--------------|--------------|---------|
| 1        | 10.897        | BV   | 0.3796      | 1.31531e4    | 529.92493    | 21.5763 |
| 2        | 11.726        | VB   | 0.4950      | 4.78077e4    | 1495.37183   | 78.4237 |
| Totals : |               |      |             | 6.09608e4    | 2025.29675   |         |

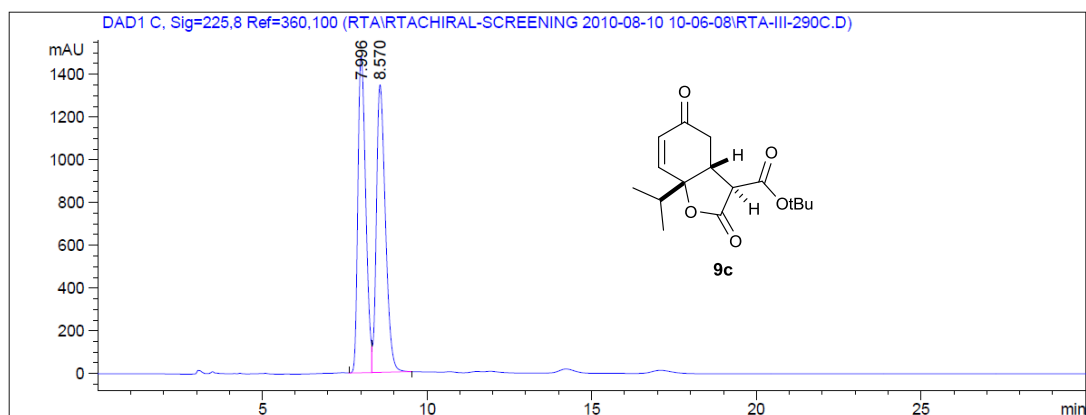

Signal 1: DAD1 C, Sig=225,8 Ref=360,100

| Peak #   | RetTime [min] | Type | Width [min] | Area [mAU*s] | Height [mAU] | Area %  |
|----------|---------------|------|-------------|--------------|--------------|---------|
| 1        | 7.996         | VV   | 0.2597      | 2.45907e4    | 1481.15747   | 49.0026 |
| 2        | 8.570         | VB   | 0.2938      | 2.55918e4    | 1345.97168   | 50.9974 |
| Totals : |               |      |             | 5.01825e4    | 2827.12915   |         |

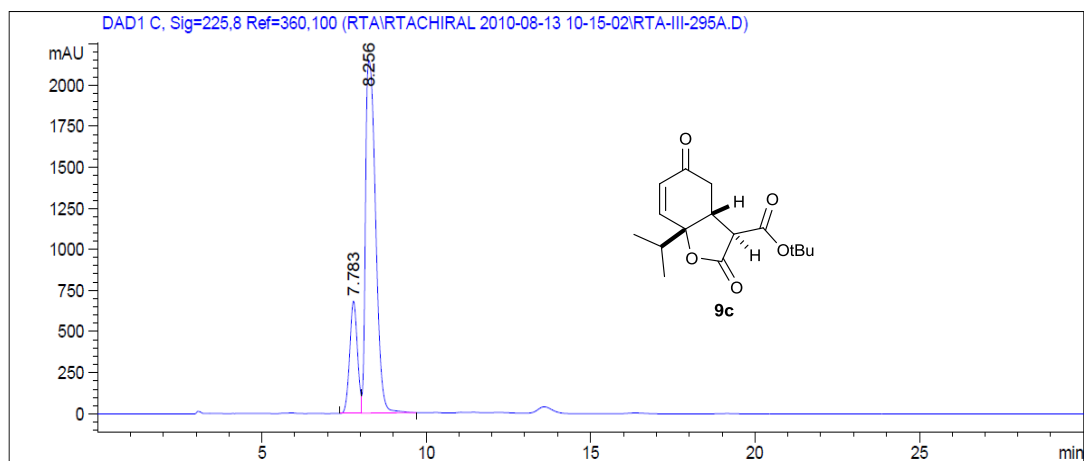

Signal 1: DAD1 C, Sig=225,8 Ref=360,100

| Peak #   | RetTime [min] | Type | Width [min] | Area [mAU*s] | Height [mAU] | Area %  |
|----------|---------------|------|-------------|--------------|--------------|---------|
| 1        | 7.783         | BV   | 0.2503      | 1.11395e4    | 683.06348    | 19.5405 |
| 2        | 8.256         | VB   | 0.3392      | 4.58678e4    | 2147.51904   | 80.4595 |
| Totals : |               |      |             | 5.70074e4    | 2830.58252   |         |

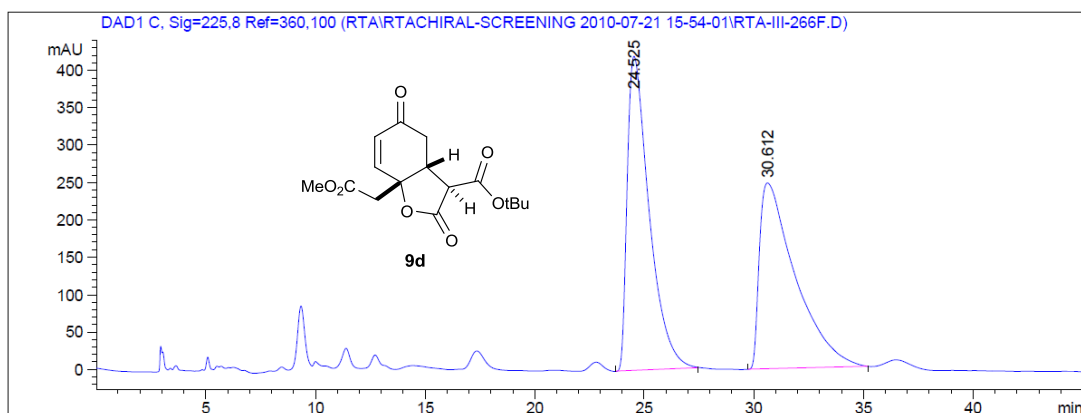

Signal 1: DAD1 C, Sig=225,8 Ref=360,100

| Peak #   | RetTime [min] | Type | Width [min] | Area [mAU*s] | Height [mAU] | Area %  |
|----------|---------------|------|-------------|--------------|--------------|---------|
| 1        | 24.525        | VB   | 1.0519      | 2.93265e4    | 420.38501    | 50.7998 |
| 2        | 30.612        | BB   | 1.6125      | 2.84031e4    | 248.67615    | 49.2002 |
| Totals : |               |      |             | 5.77296e4    | 669.06116    |         |

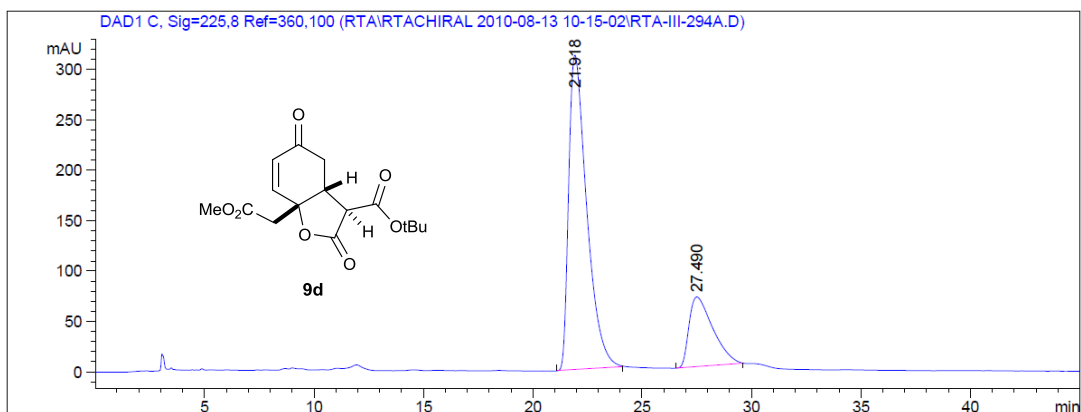

Signal 1: DAD1 C, Sig=225,8 Ref=360,100

| Peak #   | RetTime [min] | Type | Width [min] | Area [mAU*s] | Height [mAU] | Area %  |
|----------|---------------|------|-------------|--------------|--------------|---------|
| 1        | 21.918        | BB   | 0.8675      | 1.79123e4    | 312.11633    | 77.3304 |
| 2        | 27.490        | BB   | 1.1444      | 5251.05518   | 69.26980     | 22.6696 |
| Totals : |               |      |             | 2.31634e4    | 381.38613    |         |

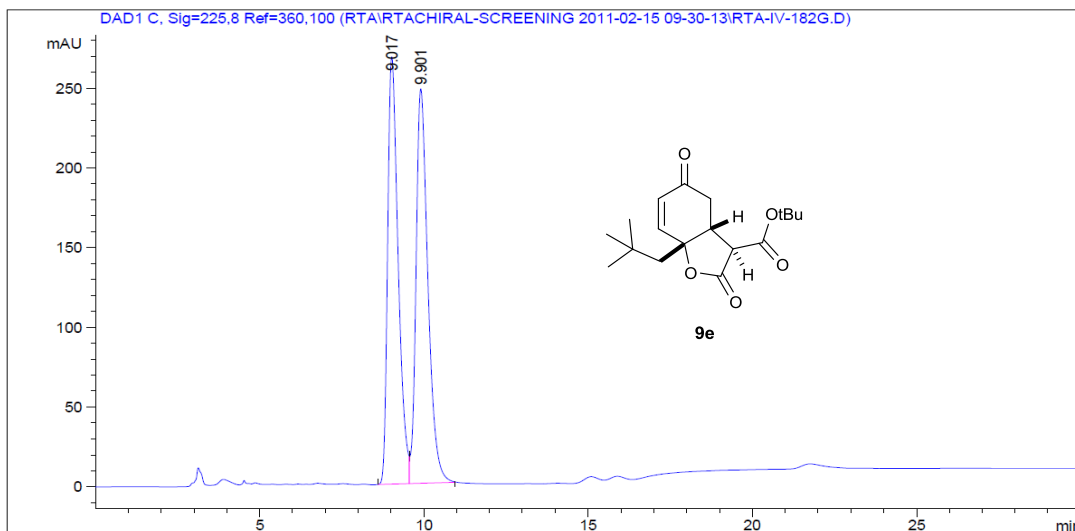

Signal 1: DAD1 C, Sig=225,8 Ref=360,100

| Peak #   | RetTime [min] | Type | Width [min] | Area [mAU*s] | Height [mAU] | Area %  |
|----------|---------------|------|-------------|--------------|--------------|---------|
| 1        | 9.017         | BV   | 0.3384      | 5987.78760   | 268.27936    | 49.0460 |
| 2        | 9.901         | VB   | 0.3790      | 6220.72998   | 247.67616    | 50.9540 |
| Totals : |               |      |             | 1.22085e4    | 515.95552    |         |

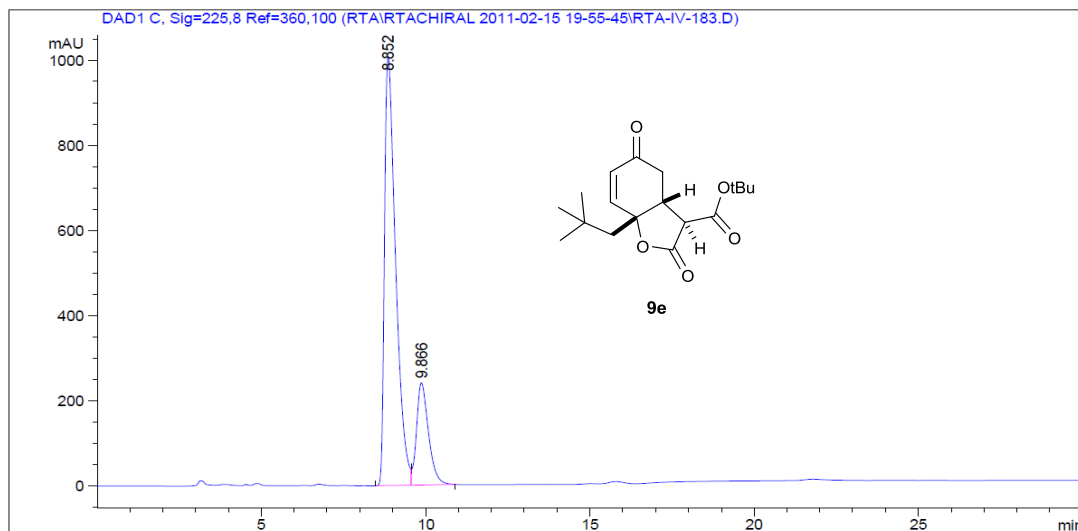

Signal 1: DAD1 C, Sig=225,8 Ref=360,100

| Peak #   | RetTime [min] | Type | Width [min] | Area [mAU*s] | Height [mAU] | Area %  |
|----------|---------------|------|-------------|--------------|--------------|---------|
| 1        | 8.852         | BV   | 0.3555      | 2.37998e4    | 1007.76569   | 79.5687 |
| 2        | 9.866         | VB   | 0.3846      | 6111.21484   | 240.36726    | 20.4313 |
| Totals : |               |      |             | 2.99110e4    | 1248.13295   |         |

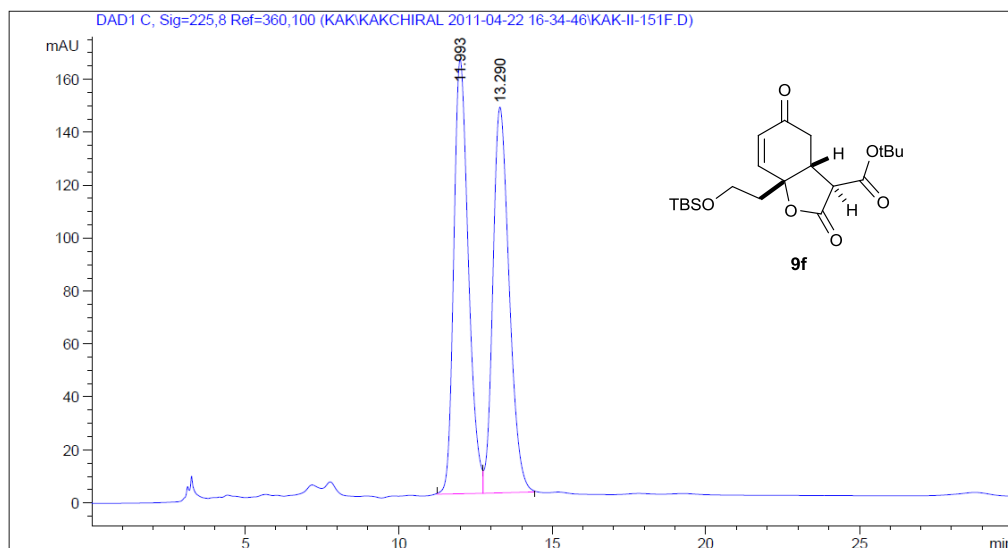

Signal 1: DAD1 C, Sig=225,8 Ref=360,100

| Peak #   | RetTime [min] | Type | Width [min] | Area [mAU*s] | Height [mAU] | Area %  |
|----------|---------------|------|-------------|--------------|--------------|---------|
| 1        | 11.993        | BV   | 0.5121      | 5460.72900   | 164.16624    | 50.3019 |
| 2        | 13.290        | VB   | 0.5699      | 5395.17236   | 145.72881    | 49.6981 |
| Totals : |               |      |             | 1.08559e4    | 309.89505    |         |

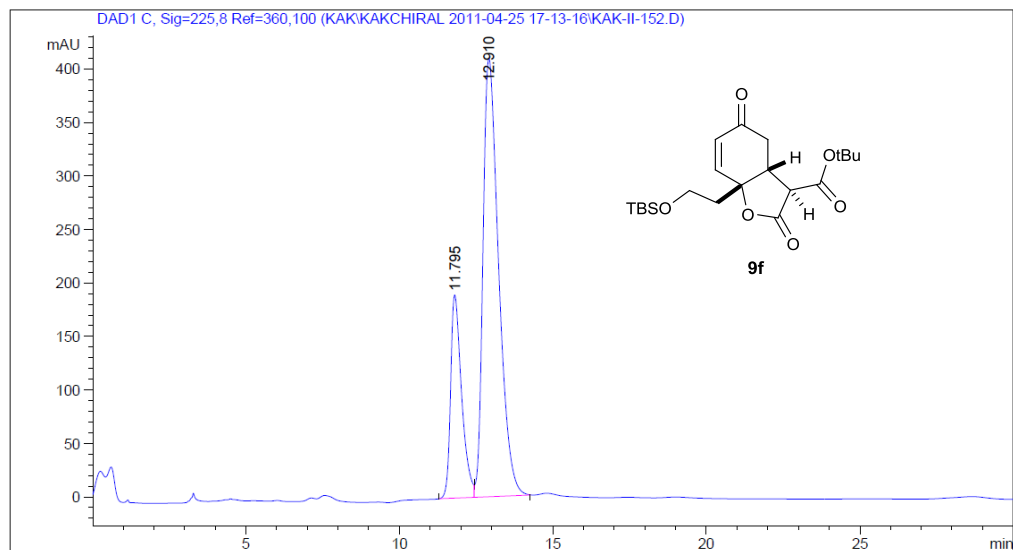

Signal 1: DAD1 C, Sig=225,8 Ref=360,100

| Peak #   | RetTime [min] | Type | Width [min] | Area [mAU*s] | Height [mAU] | Area %  |
|----------|---------------|------|-------------|--------------|--------------|---------|
| 1        | 11.795        | BV   | 0.3738      | 4756.44775   | 190.15103    | 24.6850 |
| 2        | 12.910        | VB   | 0.5388      | 1.45121e4    | 410.17517    | 75.3150 |
| Totals : |               |      |             | 1.92686e4    | 600.32620    |         |

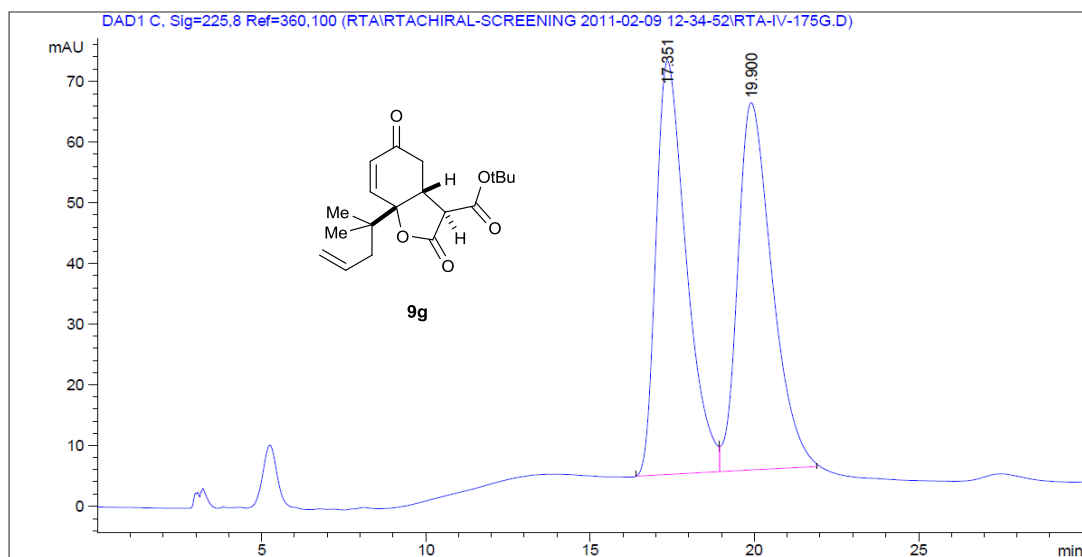

Signal 1: DAD1 C, Sig=225,8 Ref=360,100

| Peak #   | RetTime [min] | Type | Width [min] | Area [mAU*s] | Height [mAU] | Area %  |
|----------|---------------|------|-------------|--------------|--------------|---------|
| 1        | 17.351        | BV   | 0.9796      | 4358.75537   | 68.20110     | 49.8197 |
| 2        | 19.900        | VB   | 1.0800      | 4390.29785   | 60.54633     | 50.1803 |
| Totals : |               |      |             | 8749.05322   | 128.74743    |         |

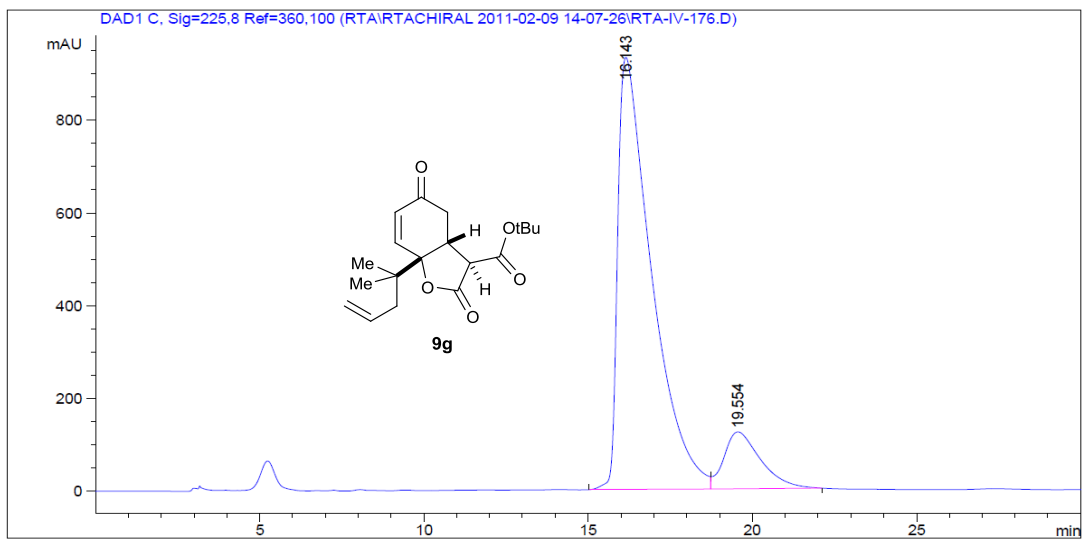

Signal 1: DAD1 C, Sig=225,8 Ref=360,100

| Peak #   | RetTime [min] | Type | Width [min] | Area [mAU*s] | Height [mAU] | Area %  |
|----------|---------------|------|-------------|--------------|--------------|---------|
| 1        | 16.143        | BV   | 1.0349      | 6.67601e4    | 932.88239    | 87.4301 |
| 2        | 19.554        | VB   | 1.1545      | 9598.15430   | 122.99047    | 12.5699 |
| Totals : |               |      |             | 7.63582e4    | 1055.87286   |         |

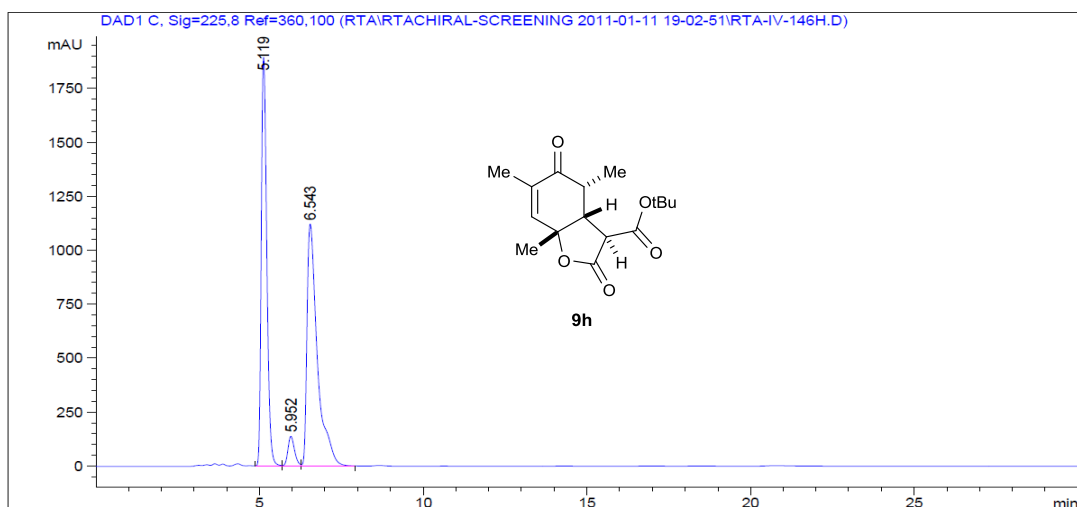

Signal 1: DAD1 C, Sig=225,8 Ref=360,100

| Peak #   | RetTime [min] | Type | Width [min] | Area [mAU*s] | Height [mAU] | Area %  |
|----------|---------------|------|-------------|--------------|--------------|---------|
| 1        | 5.119         | VV   | 0.1803      | 2.21447e4    | 1895.46582   | 45.3031 |
| 2        | 5.952         | VV   | 0.2205      | 1975.79810   | 138.44162    | 4.0420  |
| 3        | 6.543         | VB   | 0.3275      | 2.47607e4    | 1121.99731   | 50.6549 |
| Totals : |               |      |             | 4.88812e4    | 3155.90475   |         |

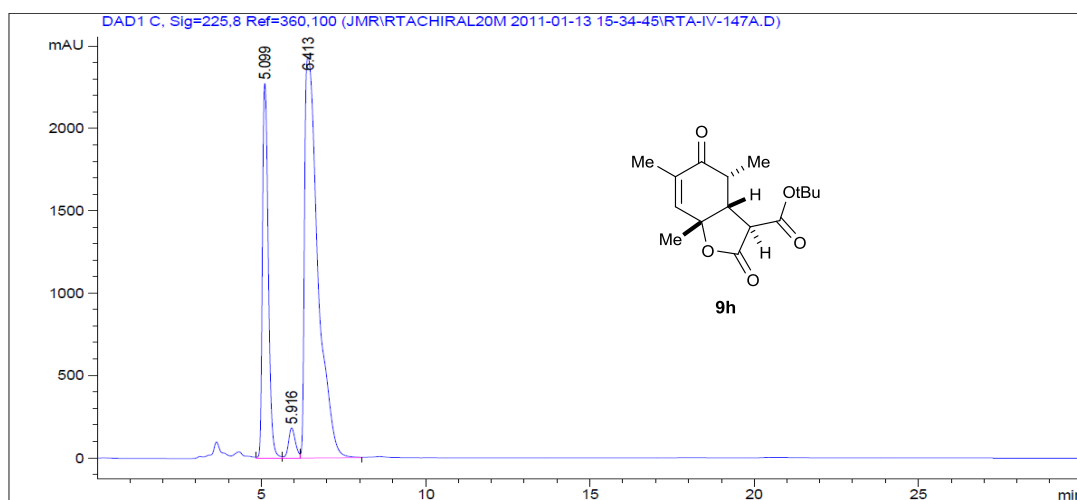

Signal 1: DAD1 C, Sig=225,8 Ref=360,100

| Peak #   | RetTime [min] | Type | Width [min] | Area [mAU*s] | Height [mAU] | Area %  |
|----------|---------------|------|-------------|--------------|--------------|---------|
| 1        | 5.099         | VV   | 0.1945      | 2.81788e4    | 2275.27051   | 28.2121 |
| 2        | 5.916         | VV   | 0.2217      | 2670.45532   | 183.64128    | 2.6736  |
| 3        | 6.413         | VB   | 0.4309      | 6.90325e4    | 2433.61670   | 69.1142 |
| Totals : |               |      |             | 9.98818e4    | 4892.52849   |         |

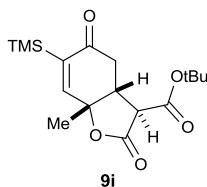

Signal 1: DAD1 C, Sig=225,8 Ref=360,100

| Peak #   | RetTime [min] | Type | Width [min] | Area [mAU*s] | Height [mAU] | Area %  |
|----------|---------------|------|-------------|--------------|--------------|---------|
| 1        | 4.733         | VV   | 0.1452      | 1.40737e4    | 1503.52515   | 49.2863 |
| 2        | 5.112         | VV   | 0.1790      | 1.44813e4    | 1198.34216   | 50.7137 |
| Totals : |               |      |             | 2.85550e4    | 2701.86731   |         |

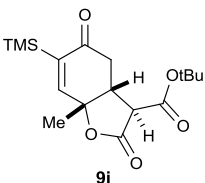

Signal 1: DAD1 C, Sig=225,8 Ref=360,100

| Peak #   | RetTime [min] | Type | Width [min] | Area [mAU*s] | Height [mAU] | Area %  |
|----------|---------------|------|-------------|--------------|--------------|---------|
| 1        | 4.746         | BV   | 0.1359      | 2441.79980   | 274.21561    | 35.2086 |
| 2        | 5.173         | VB   | 0.1646      | 4493.44629   | 414.24277    | 64.7914 |
| Totals : |               |      |             | 6935.24609   | 688.45837    |         |



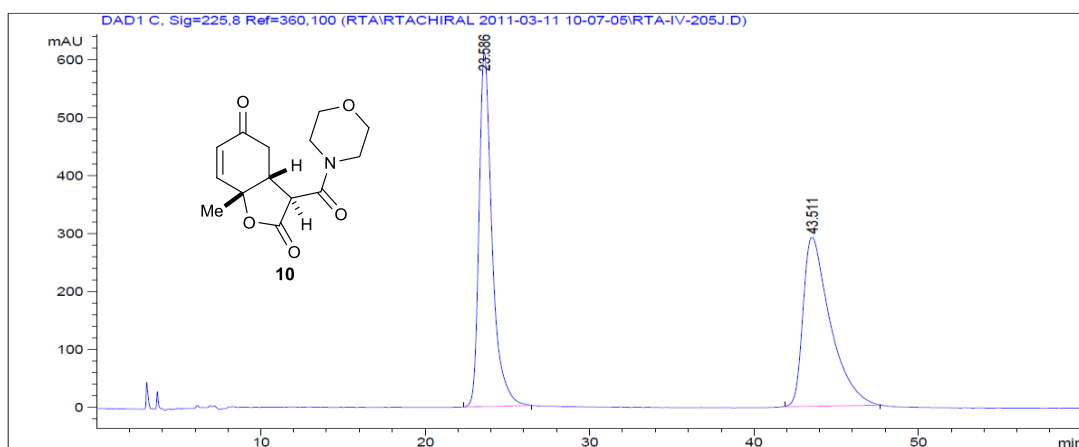

Signal 1: DAD1 C, Sig=225,8 Ref=360,100

| Peak #   | RetTime [min] | Type | Width [min] | Area [mAU*s] | Height [mAU] | Area %  |
|----------|---------------|------|-------------|--------------|--------------|---------|
| 1        | 23.586        | BB   | 0.8247      | 3.37105e4    | 611.93066    | 50.0626 |
| 2        | 43.511        | BB   | 1.6687      | 3.36262e4    | 292.17975    | 49.9374 |
| Totals : |               |      |             | 6.73367e4    | 904.11041    |         |

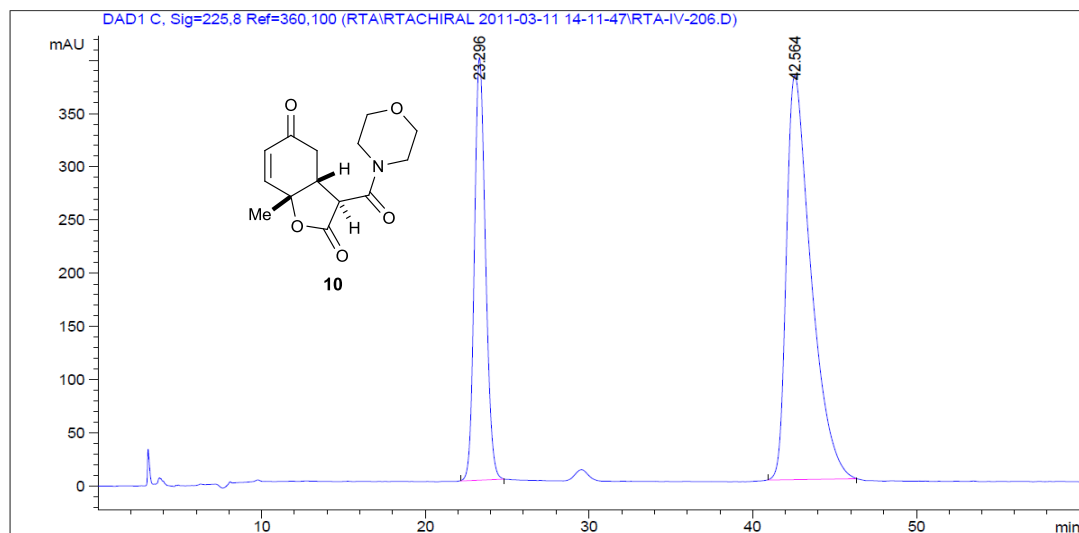

Signal 1: DAD1 C, Sig=225,8 Ref=360,100

| Peak #   | RetTime [min] | Type | Width [min] | Area [mAU*s] | Height [mAU] | Area %  |
|----------|---------------|------|-------------|--------------|--------------|---------|
| 1        | 23.296        | BB   | 0.7258      | 1.87056e4    | 396.94693    | 31.9701 |
| 2        | 42.564        | BB   | 1.5509      | 3.98040e4    | 379.73398    | 68.0299 |
| Totals : |               |      |             | 5.85097e4    | 776.68091    |         |

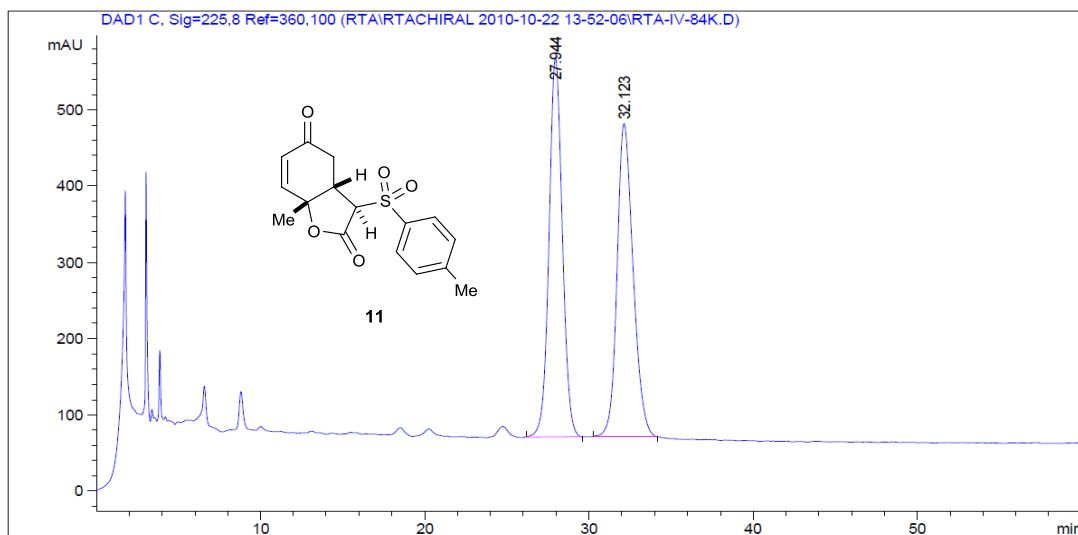

Signal 1: DAD1 C, Sig=225,8 Ref=360,100

| Peak #   | RetTime [min] | Type | Width [min] | Area [mAU*s] | Height [mAU] | Area %  |
|----------|---------------|------|-------------|--------------|--------------|---------|
| 1        | 27.944        | BB   | 0.8683      | 2.80527e4    | 497.19113    | 50.1618 |
| 2        | 32.123        | BB   | 1.0442      | 2.78717e4    | 410.48291    | 49.8382 |
| Totals : |               |      |             | 5.59243e4    | 907.67404    |         |

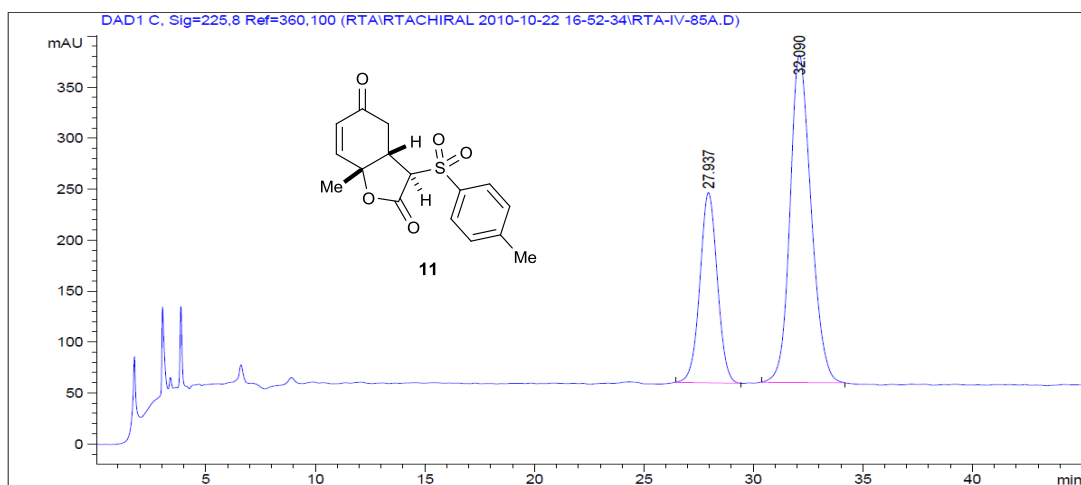

Signal 1: DAD1 C, Sig=225,8 Ref=360,100

| Peak #   | RetTime [min] | Type | Width [min] | Area [mAU*s] | Height [mAU] | Area %  |
|----------|---------------|------|-------------|--------------|--------------|---------|
| 1        | 27.937        | BB   | 0.8573      | 1.03660e4    | 186.84067    | 32.4235 |
| 2        | 32.090        | BB   | 1.0356      | 2.16047e4    | 321.65137    | 67.5765 |
| Totals : |               |      |             | 3.19707e4    | 508.49203    |         |

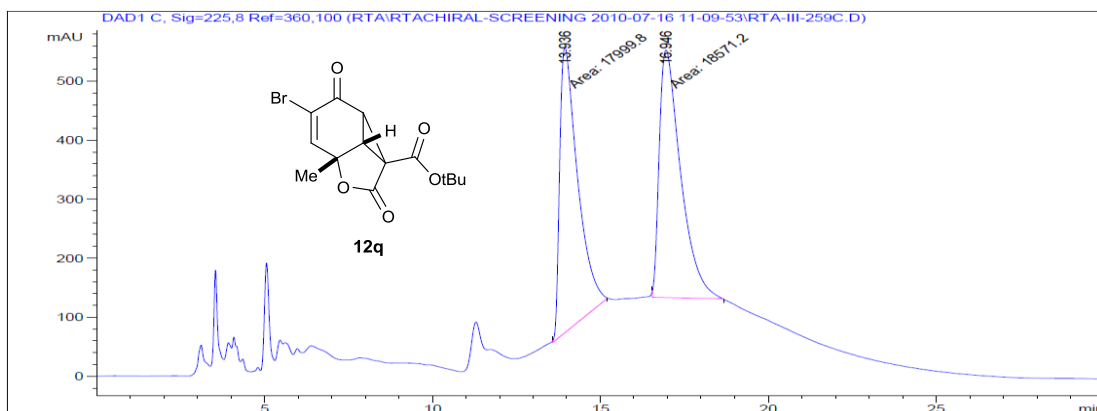

Signal 1: DAD1 C, Sig=225,8 Ref=360,100

| Peak #   | RetTime [min] | Type | Width [min] | Area [mAU*s] | Height [mAU] | Area %  |
|----------|---------------|------|-------------|--------------|--------------|---------|
| 1        | 13.936        | MM   | 0.6193      | 1.79998e4    | 484.44879    | 49.2189 |
| 2        | 16.946        | MM   | 0.7369      | 1.85712e4    | 420.01151    | 50.7811 |
| Totals : |               |      |             | 3.65710e4    | 904.46030    |         |

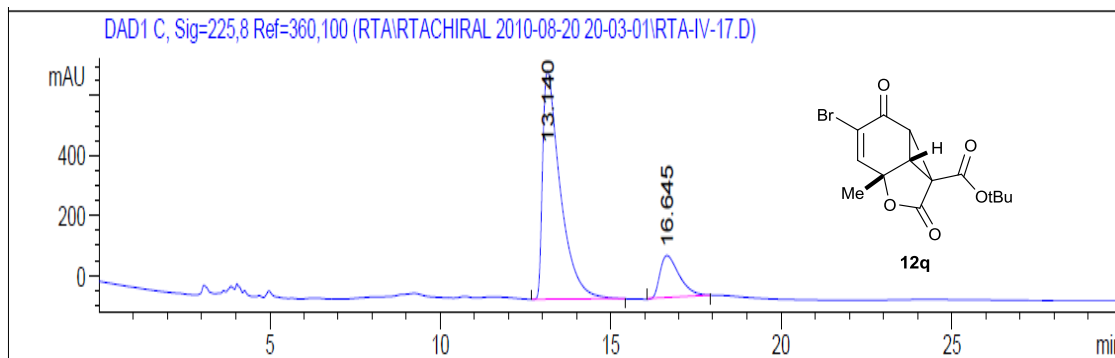

Signal 1: DAD1 C, Sig=225,8 Ref=360,100

| Peak #   | RetTime [min] | Type | Width [min] | Area [mAU*s] | Height [mAU] | Area %  |
|----------|---------------|------|-------------|--------------|--------------|---------|
| 1        | 13.140        | VB   | 0.5291      | 2.75291e4    | 762.63934    | 82.9901 |
| 2        | 16.645        | BB   | 0.6034      | 5642.45020   | 142.04649    | 17.0099 |
| Totals : |               |      |             | 3.31715e4    | 904.68584    |         |

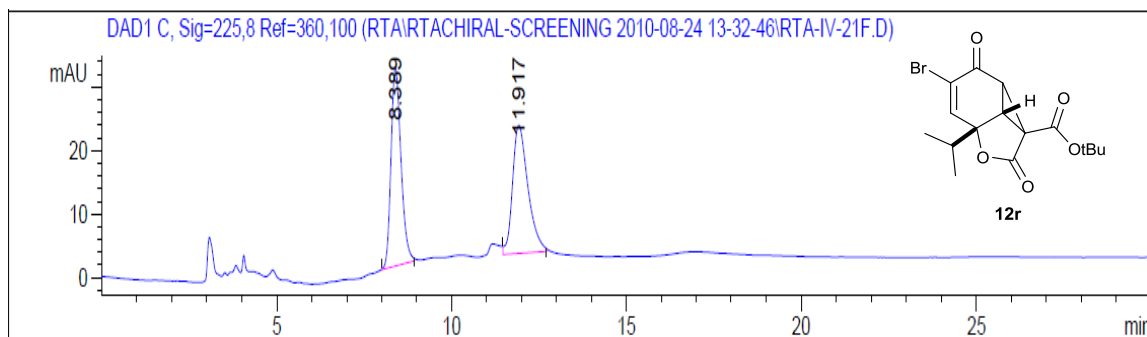

Signal 1: DAD1 C, Sig=225,8 Ref=360,100

| Peak #   | RetTime [min] | Type | Width [min] | Area [mAU*s] | Height [mAU] | Area %  |
|----------|---------------|------|-------------|--------------|--------------|---------|
| 1        | 8.389         | BB   | 0.3062      | 621.01746    | 31.20434     | 50.0388 |
| 2        | 11.917        | BB   | 0.4643      | 620.05469    | 20.18884     | 49.9612 |
| Totals : |               |      |             | 1241.07214   | 51.39318     |         |

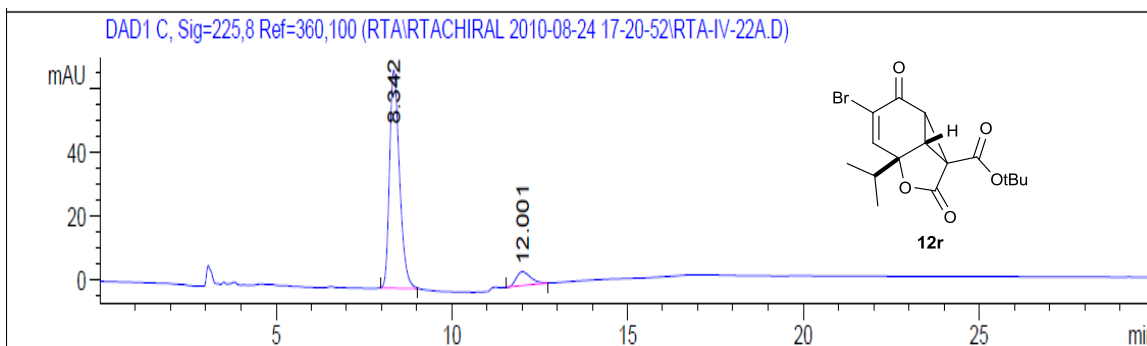

Signal 1: DAD1 C, Sig=225,8 Ref=360,100

| Peak #   | RetTime [min] | Type | Width [min] | Area [mAU*s] | Height [mAU] | Area %  |
|----------|---------------|------|-------------|--------------|--------------|---------|
| 1        | 8.342         | BB   | 0.3026      | 1357.14783   | 68.67429     | 91.0858 |
| 2        | 12.001        | BB   | 0.4555      | 132.81891    | 4.48435      | 8.9142  |
| Totals : |               |      |             | 1489.96674   | 73.15865     |         |

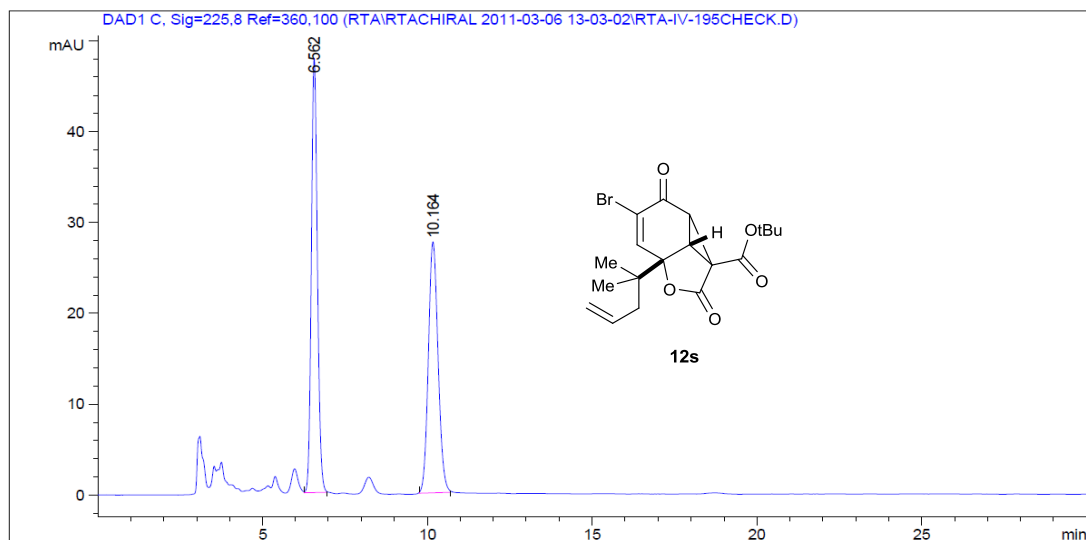

Signal 1: DAD1 C, Sig=225,8 Ref=360,100

| Peak #   | RetTime [min] | Type | Width [min] | Area [mAU*s] | Height [mAU] | Area %  |
|----------|---------------|------|-------------|--------------|--------------|---------|
| 1        | 6.562         | VB   | 0.1968      | 610.60992    | 47.86470     | 51.8827 |
| 2        | 10.164        | BB   | 0.3169      | 566.29553    | 27.65885     | 48.1173 |
| Totals : |               |      |             | 1176.90546   | 75.52355     |         |

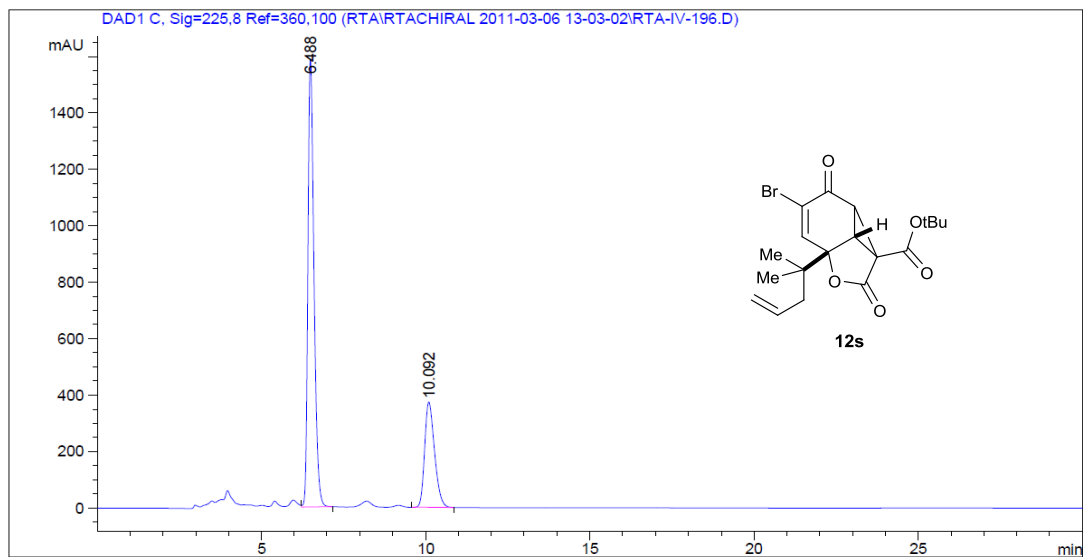

Signal 1: DAD1 C, Sig=225,8 Ref=360,100

| Peak #   | RetTime [min] | Type | Width [min] | Area [mAU*s] | Height [mAU] | Area %  |
|----------|---------------|------|-------------|--------------|--------------|---------|
| 1        | 6.488         | VB   | 0.1953      | 2.03476e4    | 1589.64600   | 72.1979 |
| 2        | 10.092        | VB   | 0.3225      | 7835.46924   | 373.82523    | 27.8021 |
| Totals : |               |      |             | 2.81830e4    | 1963.47122   |         |

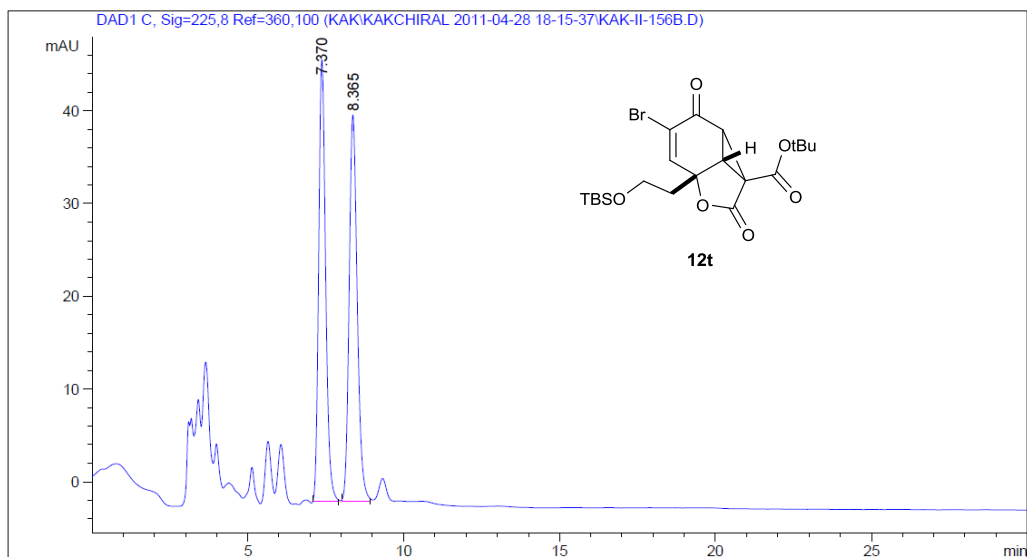

Signal 1: DAD1 C, Sig=225,8 Ref=360,100

| Peak #   | RetTime [min] | Type | Width [min] | Area [mAU*s] | Height [mAU] | Area %  |
|----------|---------------|------|-------------|--------------|--------------|---------|
| 1        | 7.370         | BB   | 0.2386      | 737.87378    | 47.67091     | 49.4908 |
| 2        | 8.365         | BB   | 0.2787      | 753.05872    | 41.68877     | 50.5092 |
| Totals : |               |      |             | 1490.93250   | 89.35967     |         |

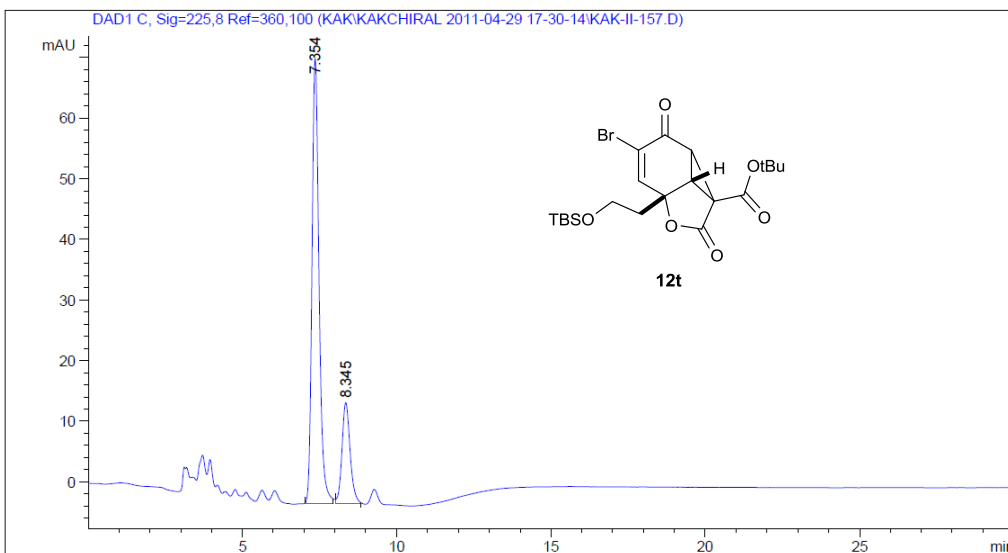

Signal 1: DAD1 C, Sig=225,8 Ref=360,100

| Peak #   | RetTime [min] | Type | Width [min] | Area [mAU*s] | Height [mAU] | Area %  |
|----------|---------------|------|-------------|--------------|--------------|---------|
| 1        | 7.354         | BB   | 0.2405      | 1160.50854   | 73.36861     | 79.0275 |
| 2        | 8.345         | BB   | 0.2811      | 307.97888    | 16.70793     | 20.9725 |
| Totals : |               |      |             | 1468.48743   | 90.07654     |         |
